# Supplementary material for: The landscape of m1A modification and its posttranscriptional regulatory functions in primary neurons
Source: eLife. 2023 Mar 7;12:e85324. doi: 10.7554/eLife.85324 (PMC9991057; doi:10.7554/eLife.85324)
Supplement: Figure 2—source data 1. [file elife-85324-fig2-data1.xlsx]

## Sheet: Control-m1A_mRNA
Chromosome	Transcript start	Transcript end	Peak ID	Score	Peak length	Transcript ID	Gene name	P value (-log10)	Fold enrichment	FDR	Gene ID	Synonyms
chr2	125099960	125100420	MACS_peak_105574	3228.29	460	uc008mcc.2	Myef2	3228.29	24.72	0	17876	9430071B01|mKIAA1341
chr8	22937988	22942175	MACS_peak_173496	3228.29	4187	NM_001081149	Kat6a	3228.29	20.05	0	244349	1500036M03|9930021N24Rik|MOZ|Myst3|Zfp220
chr5	4045897	4046941	MACS_peak_134425	3223.06	1044	NM_194462	Akap9	3223.06	14.78	0	100986	5730481H23Rik|AKAP-9|AKAP450|AW545847|C79026|G1-448-15|PRKA9|mKIAA0803|mei2-5|repro12
chr5	30888940	30889655	MACS_peak_117436	3218.15	715	uc008wwd.1	Agbl5	3218.15	45.5	0	231093	4930455N08|9430057O19Rik|CCP5
chr19	9982585	9982983	MACS_peak_91958	3212.81	398	uc008got.2	Fth1	3212.81	6.38	14.29	14319	FHC|Fth|HFt|MFH
chr13	14164108	14165141	MACS_peak_45238	3211.51	1033	uc007pmy.2	Arid4b	3211.51	21.57	25	94246	BCAA|BRCAA1|RBBP1L1|Rbp1l1|SAP180
chr4	43424183	43426128	MACS_peak_123850	3211.36	1945	uc033ibq.1	Rusc2	3211.36	26.17	22.22	100213	AI840675|mKIAA0375
chr8	70529390	70529874	MACS_peak_135059	3200.73	484	uc009mar.2	Fkbp8	3200.73	10.91	0	14232	38kDa|FKBP-38|FKBP-8|Fkbp38
chr2	134597945	134598865	MACS_peak_91307	3200.43	920	NM_029148	Tmx4	3200.43	16.07	0	52837	2810417D04Rik|4930500L08Rik|AI843224|AW046784|D2Bwg1356e|Txndc13|mKIAA1162
chr2	5957470	5957850	MACS_peak_73644	3200.07	380	NM_001081132	Upf2	3200.07	17.29	0	326622	-
chr9	103365053	103365732	MACS_peak_164596	3199.84	679	NM_175565	Cdv3	3199.84	11.41	0	321022	2510010F10Rik|C230084J24Rik|C79446|TPP36
chr2	92403769	92405820	MACS_peak_103153	3198.43	2051	NM_009963	Cry2	3198.43	29.99	16.67	12953	AV006279|D130054K12Rik
chr7	25237377	25237851	MACS_peak_122679	3188.65	474	NM_001031667	Gsk3a	3188.65	13.53	0	606496	2700086H06Rik
chr11	99209061	99210277	MACS_peak_32188	3186.33	1216	NM_020618	Smarce1	3186.33	27.95	18.75	57376	2810417B20Rik|5830412H02Rik|9030408N19Rik|Baf27
chr12	59061155	59061461	MACS_peak_38986	3182.82	306	NM_030057	Trappc6b	3182.82	15.68	17.65	78232	5830498C14Rik|C79212
chr2	113847960	113848661	MACS_peak_79787	3182.48	701	NM_181416	Arhgap11a	3182.48	12.09	0	228482	6530401L14Rik|mKIAA0013
chr9	37552536	37552904	MACS_peak_185319	3172.85	368	ENSMUST00000065668	Nrgn	3172.85	18.24	26.32	64011	0710001B06Rik|AI838505|NG|NG/RC3|Pss1|R75334|RC3
chr5	23524147	23524615	MACS_peak_135853	3155.5	468	NM_009274	Srpk2	3155.5	12.68	20	20817	AW226533|AW492537|AW547358|Wbp6|mSRPK2
chr10	60131335	60135198	MACS_peak_17357	3154.15	3863	ENSMUST00000121820	Spock2	3154.15	14.25	19.23	94214	AA407235|Gcap26|mKIAA0275
chr7	30649937	30650303	MACS_peak_161292	3147.16	366	ENSMUST00000042726	Rbm42	3147.16	19.09	16.13	68035	1700003D06Rik|3100004P22Rik
chr3	51416015	51416376	MACS_peak_97775	3143.1	361	NM_053089	Naa15	3143.1	26.42	0	74838	5730450D16Rik|6330400I15|ASTBDN|Narg1|Tbdn-1|mNAT1
chr4	130818581	130819204	MACS_peak_131049	3141.12	623	NM_011520	Sdc3	3141.12	7.26	14.29	20970	Synd3|mKIAA0468|syn-3
chr1	105663860	105664633	MACS_peak_6934	3129.42	773	NM_029349	2310035C23Rik	3129.42	21.53	13.16	227446	6430401N10|Kiaa1468|mKIAA1468
chr3	96631688	96632136	MACS_peak_89125	3128.96	448	NM_025875	Rbm8a	3128.96	22.24	0	60365	2310057C03Rik|AA673428|Rbm8
chr11	102304665	102306766	MACS_peak_28127	3116.43	2101	NM_011551	Ubtf	3116.43	22.14	0	21429	A930005G04Rik|NOR-90|Tcfubf|UBF|UBF-1|UBF1
chr5	88554482	88556016	MACS_peak_120882	3116.25	1534	NM_023054	Utp3	3116.25	15.32	0	65961	2400011K09Rik|AW557551|C87704|Crl1|Crlz1|Sas10
chr7	127972553	127973043	MACS_peak_146251	3107.53	490	uc009jxn.1	Fus	3107.53	7.45	0	233908	D430004D17Rik|D930039C12Rik|Fus1|Tls
chr4	136602231	136602723	MACS_peak_131728	3101.65	492	NM_133872	Kdm1a	3101.65	7.91	13.04	99982	1810043O07Rik|AA408884|Aof2|D4Ertd478e|Kdm1|Lsd1|mKIAA0601
chr1	30803701	30805942	MACS_peak_1767	3100	2241	NM_001081080	Phf3	3100	39.48	11.62	213109	2310061N19Rik|mKIAA0244
chr1	37998009	37998324	MACS_peak_2433	3100	315	NM_198303	Eif5b	3100	25.41	11.62	226982	A030003E17Rik|BC018347|IF2
chr1	86348473	86350696	MACS_peak_5786	3100	2223	NM_010880	Ncl	3100	25.78	11.62	17975	B530004O11Rik|C23|D0Nds28|D1Nds28|Nucl
chr1	86529964	86530698	MACS_peak_5797	3100	734	NM_008972	Ptma	3100	41.1	11.62	19231	Thym
chr1	91501004	91501424	MACS_peak_6391	3100	420	NM_028718	Traf3ip1	3100	37.16	11.62	74019	3930402D05Rik|AU041749|MIP-T3
chr1	153455757	153456753	MACS_peak_9735	3100	996	NM_007842	Dhx9	3100	132.38	11.62	13211	AI326842|Ddx9|HEL-5|NDHII|RHA|mHEL-5
chr1	154472059	154472713	MACS_peak_9788	3100	654	NM_009782	Cacna1e	3100	16.96	11.62	12290	A430040I15|BII|Cach6|Cacnl1a6|Cav2.3|Cchra1|alpha1E
chr1	156558785	156559205	MACS_peak_10043	3100	420	ENSMUST00000173929	Abl2	3100	39.58	11.62	11352	AA536808|Abll|Arg
chr1	162710282	162710829	MACS_peak_10820	3100	547	NM_001081290	Prrc2c	3100	21.1	11.62	226562	1810043M20Rik|9630039I18Rik|A630006J20|Bat2d|Bat2d1|Bat2l2|E130112L15Rik|Prrc3|mKIAA1096
chr1	171357787	171358109	MACS_peak_11465	3100	322	ENSMUST00000006579	Pfdn2	3100	15.99	11.62	18637	ESTM27|W48336
chr1	178336952	178337797	MACS_peak_12004	3100	845	ENSMUST00000037748	Hnrnpu	3100	18.9	11.62	51810	AA408410|AI256620|AL024194|AL024437|AW557595|C86794|Hnrpu|SAFA|Sp120|hnRNP U
chr1	188971211	188972683	MACS_peak_12867	3100	1472	NM_172650	Kctd3	3100	24.68	11.62	226823	4930438A20Rik|9330185B06|E330032J19Rik|NY-REN-45
chr10	34282189	34284413	MACS_peak_15723	3100	2224	NM_009433	Tspyl1	3100	22	11.62	22110	Tspyl
chr10	40349307	40349721	MACS_peak_15954	3100	414	NM_198164	Cdk19	3100	32.18	11.62	78334	2700084L06Rik|AI845279|AW228747|CDK11|Cdc2l6|mKIAA1028
chr10	63015494	63016701	MACS_peak_17633	3100	1207	NM_027425	Rufy2	3100	20.4	11.62	70432	2610111M19Rik|AI844453|Denn|LZ-FYVE|ZFYVE13
chr10	78400361	78400984	MACS_peak_19044	3100	623	NM_010925	Rrp1	3100	11.56	11.62	18114	AL033305|AL033306|AU018604|NNP-1|Nnp1
chr10	79864780	79866181	MACS_peak_19161	3100	1401	NM_181681	Lppr3	3100	20.17	11.62	NA	NA
chr10	80302136	80303355	MACS_peak_19249	3100	1219	uc007gco.1	Apc2	3100	47.49	11.62	23805	AI852447|APCL|R75424
chr10	80399121	80399550	MACS_peak_19259	3100	429	ENSMUST00000092295	Mbd3	3100	31.15	11.62	17192	AI181826|AU019209
chr10	93889537	93889992	MACS_peak_20879	3100	455	NM_019648	Metap2	3100	12.11	11.62	56307	4930584B20Rik|A930035J23Rik|AI047573|AL024412|AU014659|Amp2|Mnpep|p67|p67eIF2
chr11	30142119	30142422	MACS_peak_25159	3100	303	NM_009260	Sptbn1	3100	10.93	11.62	20742	9930031C03Rik|AL033301|SPTB2|Spnb-2|Spnb2|elf1|elf3|mKIAA4049
chr11	31870939	31873412	MACS_peak_25308	3100	2473	NM_026252	Cpeb4	3100	18.49	11.62	67579	Cpe-bp4|Cpeb-4|mCPEB-4
chr11	48815842	48817389	MACS_peak_26645	3100	1547	NM_145377	Trim41	3100	24.22	11.62	211007	AW552703|BC020156|R75223|RINCK
chr11	49712353	49712723	MACS_peak_26676	3100	370	ENSMUST00000145353	Cnot6	3100	57.23	11.62	104625	CCR4
chr11	52098680	52099150	MACS_peak_26996	3100	470	ENSMUST00000020608	Ppp2ca	3100	18.7	11.62	19052	PP2A|R75353
chr11	69123304	69124055	MACS_peak_28719	3100	751	ENSMUST00000024543	Hes7	3100	44.35	11.62	84653	bHLHb37
chr11	70393761	70395192	MACS_peak_28872	3100	1431	NM_029231	Pelp1	3100	29.23	11.62	75273	4930563C04Rik|MNAR
chr11	74723199	74723858	MACS_peak_29254	3100	659	uc007kce.2	Pafah1b1	3100	30.56	11.62	18472	LIS-1|Lis1|MMS10-U|Mdsh|Ms10u|Pafaha
chr11	83504641	83505104	MACS_peak_30673	3100	463	NM_027427	Taf15	3100	163.97	11.62	70439	2610111C21Rik|68kDa|TAFII68|Taf2n
chr11	87127074	87127494	MACS_peak_31098	3100	420	NM_197987	Trim37	3100	17.56	11.62	68729	1110032A10Rik|2810004E07Rik|AI848587|AU043018|MUL|TEF3|mKIAA0898
chr11	87979524	87981570	MACS_peak_31187	3100	2046	NM_026556	Dynll2	3100	14.83	11.62	68097	1700064A15Rik|6720463E02Rik|C87222|DLC8|DLC8b|Dlc2
chr11	94328000	94328387	MACS_peak_31621	3100	387	NM_027799	Ankrd40	3100	26.69	11.62	71452	1110011C06Rik|5530600A18Rik|Gcap15
chr11	94991034	94992918	MACS_peak_31701	3100	1884	ENSMUST00000038696	Ppp1r9b	3100	14.19	11.62	217124	SPL|Spn
chr11	98809675	98810091	MACS_peak_32134	3100	416	ENSMUST00000017384	Casc3	3100	23.58	11.62	192160	Btz|Mln51
chr11	104327971	104332090	MACS_peak_32716	3100	4119	ENSMUST00000106992	Mapt	3100	21.44	11.62	17762	AI413597|AW045860|Mtapt|Tau
chr11	106201677	106202178	MACS_peak_32984	3100	501	uc007lyj.1	Ccdc47	3100	17.83	11.62	67163	2610204L23Rik|C88307|asp4|calumin
chr11	107131273	107132127	MACS_peak_33107	3100	854	ENSMUST00000106762	Bptf	3100	22.27	11.62	207165	9430093H17Rik|Falz
chr12	29811372	29811734	MACS_peak_37155	3100	362	NM_008666	Myt1l	3100	53.46	11.62	17933	2900046C06Rik|2900093J19Rik|C630034G21Rik|Nztf1|Pmng1|Png-1|mKIAA1106
chr12	59071425	59072931	MACS_peak_38989	3100	1506	NM_008891	Pnn	3100	32.18	11.62	18949	AU045199|D12Ertd512e
chr12	102562597	102563073	MACS_peak_42808	3100	476	NM_007693	Chga	3100	21.37	11.62	12652	ChrA|cgA
chr12	108792972	108794091	MACS_peak_43375	3100	1119	ENSMUST00000021692	Yy1	3100	24.28	11.62	22632	AW488674|NF-E1
chr13	9276524	9277066	MACS_peak_44704	3100	542	NM_001081426	Dip2c	3100	15.53	11.62	208440	2900024P20Rik|9630044M06|mKIAA0934
chr13	52530419	52530836	MACS_peak_47762	3100	417	NM_001024474	Diras2	3100	36.37	11.62	68203	2900052J15Rik|AI414999
chr13	74767993	74768362	MACS_peak_49310	3100	369	uc011zby.2	Hnrnpa1l2	3100	77.96	11.62	NA	NA
chr13	92854074	92854891	MACS_peak_50268	3100	817	NM_001162945	Mtx3	3100	44.01	11.62	382793	4930470O13Rik|AA409304|AI853833|AU067765|EG624619|Gm1194|Gm6514
chr13	103752393	103752702	MACS_peak_51027	3100	309	NM_172592	Srek1	3100	15.71	11.62	218543	8430401B01|AI450757|AI462342|SRrp508|SRrp86|Sfrs12|Srsf12
chr14	31176329	31177712	MACS_peak_54955	3100	1383	NM_022656	Nisch	3100	16.14	11.62	64652	1200007D05Rik|3202002H23Rik|AW494485|I-1
chr14	49172597	49173417	MACS_peak_56225	3100	820	ENSMUST00000037362	Naa30	3100	27.1	11.62	70646	4930487N19Rik|5730533P17Rik|AI447922|AW322455|Nat12
chr14	54642160	54643048	MACS_peak_56462	3100	888	NM_019567	Acin1	3100	17.99	11.62	56215	2610036I19Rik|2610510L13Rik|Acinus|Acn|C79325|acinusL|acinusS|mKIAA0670
chr14	54894601	54894962	MACS_peak_56490	3100	361	ENSMUST00000139985	Pabpn1	3100	14.19	11.62	54196	PAB2|Pabp3|mPABII
chr14	56668247	56668564	MACS_peak_56623	3100	317	NM_023773	Mphosph8	3100	28.88	11.62	75339	1500035L22Rik|4930548G07Rik|AU040635
chr14	68087307	68087751	MACS_peak_57713	3100	444	ENSMUST00000022639	Nefl	3100	13.03	11.62	18039	AI847934|CMT2E|NF-L|NF68|Nfl
chr14	68119666	68121384	MACS_peak_57714	3100	1718	NM_008691	Nefm	3100	15.94	11.62	18040	NF-M|NF160|NF165|Nef3|Nfm
chr14	69705133	69705878	MACS_peak_57842	3100	745	NM_001146012	R3hcc1	3100	39.62	11.62	71843	1700020M16Rik|AA407796
chr14	70583294	70584937	MACS_peak_57969	3100	1643	NM_194345	Fam160b2	3100	94.1	11.62	239170	G430067P06Rik|Rai16
chr14	75323223	75323874	MACS_peak_58227	3100	651	NM_026083	Zc3h13	3100	15.42	11.62	67302	2600010B19Rik|3110050K21Rik|4930570G11Rik|C87618
chr15	25363276	25364918	MACS_peak_61935	3100	1642	NM_027395	Basp1	3100	21.07	11.62	70350	2610024P12Rik|CAP-23|CAP23|Ckap3|NAP-22|NAP22
chr15	76178518	76181899	MACS_peak_65371	3100	3381	NM_011117	Plec	3100	18.63	11.62	18810	AA591047|AU042537|EBS1|PCN|PLTN|Plec1
chr15	81399484	81400043	MACS_peak_66207	3100	559	ENSMUST00000172107	St13	3100	32.15	11.62	70356	1110007I03Rik|3110002K08Rik|AW555194|HIP|HOP|HSPABP|HSPABP1|PRO0786|SNC6|p48
chr15	98651464	98652538	MACS_peak_68039	3100	1074	uc007xnf.2	Ddx23	3100	21.31	11.62	74351	3110082M05Rik|4921506D17Rik
chr15	98737620	98740494	MACS_peak_68053	3100	2874	ENSMUST00000053183	Arf3	3100	69.34	11.62	11842	5430400P17Rik|AI854770
chr15	103244255	103245151	MACS_peak_68608	3100	896	uc007xxp.2	Hnrnpa1	3100	46.26	11.62	15382	HDP-1|Hdp|Hnrpa1|hnRNP A1|hnrnp-A1
chr16	8830099	8830685	MACS_peak_69561	3100	586	NM_001081400	1810013L24Rik	3100	25.04	11.62	69053	1110017P05Rik|3010002C02Rik|AA792997|AW124177|Gm19906|R74903
chr16	42291798	42292366	MACS_peak_73311	3100	568	NM_008083	Gap43	3100	9	11.62	14432	B-50|Basp2|GAP-43
chr16	44139808	44140111	MACS_peak_73500	3100	303	NM_028108	Naa50	3100	23.51	11.62	72117	2600005K24Rik|2810441M03Rik|AW112078|Mak3|Mak3p|Nat13|Nat5|San
chr16	90229212	90230244	MACS_peak_75899	3100	1032	NM_178923	Scaf4	3100	18.26	11.62	224432	AA517739|Sfrs15|Sra4|Srsf15
chr17	24936536	24936977	MACS_peak_78721	3100	441	NM_013931	Mapk8ip3	3100	23.41	11.62	30957	BB120594|D17Wsu15e|JIP-3|JSAP1|JSAP1a|JSAP1b|JSAP1c|JSAP1d|Jip3|Syd2|mKIAA1066
chr17	33676843	33677440	MACS_peak_80030	3100	597	uc008bzh.2	Hnrnpm	3100	21.27	11.62	76936	2610023M21Rik|AA409009|Hnrpm|mKIAA4193
chr17	36857399	36858611	MACS_peak_80310	3100	1212	NM_001025599	Trim26	3100	46.49	11.62	22670	AI462198|Zfp173|Zfp1736
chr17	47610906	47611492	MACS_peak_80929	3100	586	NM_016859	Bysl	3100	19.45	11.62	53414	Bys|Enp1
chr17	53479233	53479608	MACS_peak_81320	3100	375	NM_025887	Rab5a	3100	46.15	11.62	271457	2410015H04Rik|AI663973|AU021172|nnyRab5a
chr17	57043710	57045663	MACS_peak_81615	3100	1953	NM_025877	Slc25a23	3100	11.57	11.62	66972	2310067G05Rik|SCaMC-3
chr17	71657475	71658253	MACS_peak_82803	3100	778	NM_175639	Wdr43	3100	22.77	11.62	72515	2610318G08Rik|AU020887|AV024208|Wrd43|mKIAA0007
chr17	75538105	75539114	MACS_peak_83056	3100	1009	uc008dor.1	Fam98a	3100	19.71	11.62	72722	2810405J04Rik|AL024114
chr17	80061656	80062334	MACS_peak_83257	3100	678	uc008dqk.1	Hnrnpll	3100	39.05	11.62	72692	2510028H02Rik|2810036L13Rik|AI256697|AI852082|Hnrpll
chr18	20682591	20682963	MACS_peak_85280	3100	372	ENSMUST00000165229	Gm10269	3100	16.66	11.62	100040823	ENSMUSG00000069439
chr18	25753341	25753983	MACS_peak_85938	3100	642	NM_133195	Celf4	3100	129.03	11.62	108013	A230070D14Rik|BRUNOL-4|Brul4|Brunol4|C130060B05Rik
chr18	27598643	27599393	MACS_peak_86052	3100	750	ENSMUST00000050143	Gm7729	3100	66.89	11.62	665646	EG665646
chr19	6976981	6977324	MACS_peak_91717	3100	343	NM_008889	Ppp1r14b	3100	15.97	11.62	18938	AOM172|PHI-1|PLCB3N|Png
chr19	8819400	8820813	MACS_peak_91898	3100	1413	NM_001081196	Hnrnpul2	3100	34.24	11.62	68693	1110031M08Rik|AI465155|Hnrpul2
chr19	8871495	8871912	MACS_peak_91905	3100	417	uc008gno.1	Ubxn1	3100	7.27	11.62	225896	2B28|4930455J02Rik|D19Ertd721e|T25529
chr19	12501006	12501996	MACS_peak_92153	3100	990	NM_172442	Dtx4	3100	41.06	11.62	207521	AI449438|BC044798|D930042H13|RNF155
chr19	45006557	45008122	MACS_peak_94447	3100	1565	NM_153796	Peo1	3100	29.92	11.62	226153	D19Ertd626e|PEO|Twinl
chr19	45659775	45660312	MACS_peak_94539	3100	537	ENSMUST00000046869	Fbxw4	3100	68.25	11.62	30838	Dac|Fbw4|SHFM3|SHSF3|dactylin|dactylyn
chr19	45782931	45783520	MACS_peak_94543	3100	589	ENSMUST00000026243	Mgea5	3100	22.37	11.62	76055	2810009A20Rik|4833427O07Rik|5830447M11Rik|AA408215|Hy5|Ncoat|OGA|mKIAA0679
chr19	60766333	60766995	MACS_peak_95923	3100	662	NM_010123	Eif3a	3100	17.04	11.62	13669	A830012B05Rik|Csma|Eif3|Eif3s10|mKIAA0139
chr2	30070918	30072434	MACS_peak_98310	3100	1516	NM_023871	Set	3100	42.04	11.62	56086	2610030F17Rik|5730420M11Rik|AA407739|I-2PP2A|StF-IT-1|TAF-I
chr2	44987453	44989153	MACS_peak_99909	3100	1700	NM_015753	Zeb2	3100	33.49	11.62	24136	9130203F04Rik|D130016B08Rik|SIP1|Zfhx1b|Zfx1b|Zfxh1b
chr2	69749271	69750455	MACS_peak_101695	3100	1184	NM_001081086	Ppig	3100	15.78	11.62	228005	AU019516|AU022200|B230312B02Rik|CYP|SRCyp
chr2	102400012	102400900	MACS_peak_103705	3100	888	NM_020267	Trim44	3100	71.8	11.62	80985	Dipb|Mc7
chr2	120025712	120027341	MACS_peak_105005	3100	1629	NM_011941	Mapkbp1	3100	28.19	11.62	26390	2810483F24Rik|AW123212|JNKBP-1|Jnkbp1|mKIAA0596
chr2	121469778	121470316	MACS_peak_105241	3100	538	NM_001081975	Mfap1b	3100	33.7	11.62	100034361	-
chr2	121502331	121502869	MACS_peak_105247	3100	538	NM_026220	Mfap1a	3100	28.6	11.62	67532	4432409M24Rik|Mfap1
chr2	131177288	131180012	MACS_peak_106143	3100	2724	NM_007682	Cenpb	3100	15.57	11.62	12616	CENP-B
chr2	132792329	132794095	MACS_peak_106310	3100	1766	NM_007694	Chgb	3100	11.68	11.62	12653	Scg-1
chr2	143988147	143990266	MACS_peak_107375	3100	2119	NM_024281	Rrbp1	3100	46.36	11.62	81910	1700087N07Rik|5730465C04Rik|ES/130|mKIAA1398|mRRp0|mRRp1.8|mRRp10|mRRp15a|mRRp15b|mRRp16.8|mRRp2|mRRp41|mRRp47|mRRp5.4|p180
chr2	153316216	153317684	MACS_peak_108132	3100	1468	NM_008444	Kif3b	3100	17.54	11.62	16569	AI854312|AW549267|mKIAA0359
chr2	154657017	154657371	MACS_peak_108311	3100	354	ENSMUST00000044277	Chmp4b	3100	14.46	11.62	75608	2010012F05Rik|C76846|Snf7-2
chr2	154892189	154892795	MACS_peak_108347	3100	606	ENSMUST00000161172	Eif2s2	3100	20.44	11.62	67204	2810026E11Rik|38kDa|AA408636|AA571381|AA986487|AW822225|D2Ertd303e|EIF2|EIF2B
chr2	161052387	161052905	MACS_peak_109141	3100	518	NM_173368	Chd6	3100	16.75	11.62	71389	5430439G14Rik|6330406J24Rik|CHD-6
chr2	169633012	169633779	MACS_peak_110217	3100	767	ENSMUST00000109159	Tshz2	3100	16.36	11.62	228911	2900073F20Rik|B830045G17|Mtsh2|Sdccag33l|Tsh2|Zfp218|mKIAA4248|teashirt2
chr3	9609269	9610085	MACS_peak_111799	3100	816	NM_133218	Zfp704	3100	32.17	11.62	170753	C030026M03|C030034L19Rik|Gig1|Znf704
chr3	30818499	30820220	MACS_peak_112979	3100	1721	NM_027016	Sec62	3100	32.32	11.62	69276	3100002M17Rik|AI844545|AW545092|Dtrp1|HTP1|Tloc1
chr3	41082594	41083046	MACS_peak_113813	3100	452	NM_027558	Pgrmc2	3100	26.33	11.62	70804	4631434O19Rik|5730409G06Rik|DG6|PMBP
chr3	54481428	54482745	MACS_peak_114262	3100	1317	ENSMUST00000091130	Gm5641	3100	32.7	11.62	434807	EG434807
chr3	56182971	56183701	MACS_peak_114540	3100	730	NM_030595	Nbea	3100	15.59	11.62	26422	Lyst2|mKIAA1544
chr3	87975420	87980451	MACS_peak_116295	3100	5031	NM_016701	Nes	3100	12.43	11.62	18008	AA166324|C78523|ESTM46
chr3	88054957	88055966	MACS_peak_116306	3100	1009	NM_025663	Gpatch4	3100	27.4	11.62	66614	2610029K21Rik|Gpatc4
chr3	95945179	95947390	MACS_peak_117023	3100	2211	ENSMUST00000165307	Anp32e	3100	43.49	11.62	66471	2810018A15Rik|AI047746|AI326868|CPD1|LANP-L|LANPL|mLANP-L
chr3	108012249	108012778	MACS_peak_118076	3100	529	NM_010358	Gstm1	3100	7.76	11.62	14862	Gstb-1|Gstb1
chr3	108903105	108904762	MACS_peak_118214	3100	1657	NM_025845	Prpf38b	3100	24.93	11.62	66921	1110021E09Rik|AU018955
chr3	129830594	129830932	MACS_peak_119204	3100	338	ENSMUST00000149071	Gar1	3100	18.64	11.62	68147	AA409823|AI326794|C430047J18Rik|Nola1
chr3	145576207	145576996	MACS_peak_120052	3100	789	NM_001081094	Znhit6	3100	43.64	11.62	229937	2410019A14Rik
chr3	158011775	158012203	MACS_peak_121130	3100	428	NM_001093752	Srsf11	3100	10.77	11.62	69207	0610009J05Rik|2610019N13Rik|BF642805|Sfrs11
chr4	32982997	32983607	MACS_peak_122775	3100	610	NM_027491	Rragd	3100	24.58	11.62	52187	5730543C08Rik|AI467523|C030003H22Rik|D4Ertd174e
chr4	40947721	40948294	MACS_peak_123299	3100	573	NM_009736	Bag1	3100	29.73	11.62	12017	BAG-1|Rap46
chr4	46472086	46472488	MACS_peak_124179	3100	402	NM_130889	Anp32b	3100	87.77	11.62	67628	2410015B15Rik|PAL31|PHAPI2a|Ssp29
chr4	106911469	106911912	MACS_peak_128399	3100	443	NM_023672	Ssbp3	3100	17.07	11.62	72475	2610021L12Rik|2610200M23Rik|5730488C10Rik|AI854733|AW551939|LAST|SSDP1
chr4	109013509	109013840	MACS_peak_128712	3100	331	NM_146150	Nrd1	3100	14.95	11.62	230598	2600011I06Rik|AI875733|NRD-C|Nrdc
chr4	119294203	119294604	MACS_peak_129421	3100	401	ENSMUST00000079644	Ybx1	3100	6.96	11.62	22608	1700102N10Rik|C79409|EF1A|MSY1|Nsep1|YB-1|dbpB|mYB-1a
chr4	126177861	126178557	MACS_peak_130252	3100	696	NM_146153	Thrap3	3100	19.63	11.62	230753	9330151F09Rik|B230333E16Rik|Trap150
chr4	126242016	126242367	MACS_peak_130258	3100	351	NM_144941	Map7d1	3100	11.4	11.62	245877	AV028413|BC019977|Mtap7d1|Parcc1|Rprc1|mKIAA1187
chr4	129189759	129190072	MACS_peak_130810	3100	313	ENSMUST00000106054	Yars	3100	34.37	11.62	107271	AL024047|AU018965
chr4	129820220	129820601	MACS_peak_130894	3100	381	ENSMUST00000030578	Ptp4a2	3100	17.32	11.62	19244	Prl-2
chr4	133534227	133534542	MACS_peak_131365	3100	315	NM_010948	Nudc	3100	12.36	11.62	18221	SIG-92|Silg92
chr4	133720549	133720999	MACS_peak_131413	3100	450	NM_001080819	Arid1a	3100	11.39	11.62	93760	1110030E03Rik|BAF250a|Osa1|Smarcf1
chr4	149647372	149648899	MACS_peak_133280	3100	1527	NM_023051	Clstn1	3100	8.62	11.62	65945	1810034E21Rik|Cst-1|Cstn1
chr4	150614476	150615831	MACS_peak_133445	3100	1355	NM_001085492	Rere	3100	8.42	11.62	68703	1110033A15Rik|AI414665|ARG|ARP|ATN1L|AW742570|Atr2|DNB1|eye<m03Jus>|eyes3|mKIAA0458
chr4	152338650	152339030	MACS_peak_133775	3100	380	NM_029216	Chd5	3100	20.01	11.62	269610	4930532L22Rik|AW060752|B230399N07Rik|CHD-5
chr5	16730639	16731074	MACS_peak_135074	3100	435	ENSMUST00000073014	Gm8991	3100	279.94	11.62	668131	EG668131
chr5	29434663	29435643	MACS_peak_136579	3100	980	ENSMUST00000001611	Nom1	3100	27.5	11.62	433864	D5Kng1|Gm1040
chr5	31202667	31203284	MACS_peak_136807	3100	617	NM_008014	Ppm1g	3100	71.93	11.62	14208	AI385652|Fin13
chr5	33018815	33019154	MACS_peak_137014	3100	339	NM_011738	Ywhah	3100	22.92	11.62	22629	-
chr5	47983154	47983919	MACS_peak_138201	3100	765	NM_178804	Slit2	3100	51.25	11.62	20563	Drad-1|E030015M03Rik|E130320P19Rik|Slil3|mKIAA4141|slit-2
chr5	65536852	65537184	MACS_peak_139267	3100	332	ENSMUST00000149167	Smim14	3100	87.3	11.62	68552	1110003E01Rik|1700127H04Rik|5430439C17Rik|MAd4
chr5	74591773	74592192	MACS_peak_140104	3100	419	uc008xtm.2	Fip1l1	3100	19.6	11.62	66899	1300019H17Rik|Rje
chr5	76856330	76859154	MACS_peak_140327	3100	2824	ENSMUST00000121160	C530008M17Rik	3100	23.94	11.62	320827	2810489J07Rik|4930529A19Rik|4931405B09Rik|Kiaa1211|mKIAA1211
chr5	86816906	86817333	MACS_peak_140711	3100	427	NM_177680	Ythdc1	3100	37.33	11.62	231386	A730098D12Rik|C80342|mKIAA1966
chr5	90365666	90366185	MACS_peak_140911	3100	519	NM_030886	Ankrd17	3100	44.35	11.62	81702	4933425K22Rik|A130069E23Rik|A930008M01|AA407558|AA516750|AU040470|Foe|Gtar|Mask|mKIAA0697
chr5	93167499	93168016	MACS_peak_141154	3100	517	uc008ydx.1	2022-09-11	3100	16.95	11.62	52398	6230410I01Rik|AW548875|D5Ertd606e
chr5	99978391	99978938	MACS_peak_141515	3100	547	NM_007516	Hnrnpd	3100	40.16	11.62	11991	Auf1|Hnrpd
chr5	104092377	104093373	MACS_peak_141917	3100	996	NM_010097	Sparcl1	3100	8.78	11.62	13602	Ecm2|Sc1|hevin|mast9
chr5	105914667	105915136	MACS_peak_142116	3100	469	NM_018759	Zfp326	3100	14.06	11.62	54367	5730470H14Rik|ZAN75|Znf326
chr5	108518622	108520326	MACS_peak_142320	3100	1704	NM_007756	Cplx1	3100	19.65	11.62	12889	921-S
chr5	113771320	113771649	MACS_peak_143046	3100	329	NM_016926	Sart3	3100	25.42	11.62	53890	AU045857|mKIAA0156
chr5	117115671	117115993	MACS_peak_143537	3100	322	NM_178622	Suds3	3100	17.95	11.62	71954	2400003N08Rik|2410008L21Rik|AU067672|mSds3
chr5	117773233	117774907	MACS_peak_143710	3100	1674	ENSMUST00000180430	Ksr2	3100	65.2	11.62	333050	-
chr5	120627059	120627624	MACS_peak_144004	3100	565	NM_028041	Ddx54	3100	15.86	11.62	71990	2410015A15Rik|AI414901|DP97
chr5	120710054	120710975	MACS_peak_144018	3100	921	NM_008052	Dtx1	3100	22.24	11.62	14357	Fxit1|mKIAA4160
chr5	122158277	122158615	MACS_peak_144292	3100	338	ENSMUST00000102528	Ppp1cc	3100	24.67	11.62	19047	PP-1G|PP1|dis2m1
chr5	130448791	130449458	MACS_peak_145331	3100	667	NM_021371	Caln1	3100	38.72	11.62	140904	9630012C17Rik|Cabp8|MNCb-0849
chr5	137684358	137684753	MACS_peak_146587	3100	395	NM_178162	Agfg2	3100	77.24	11.62	231801	A630095P14Rik|Hrbl|RAB-R|RABR
chr5	140419304	140419826	MACS_peak_146928	3100	522	NM_133916	Eif3b	3100	7.05	11.62	27979	AL033316|AL033334|AL033369|AW208965|D5Wsu45e|EIF3-ETA|EIF3-P110|EIF3-P116|Eif3s9|PRT1
chr5	143264292	143264681	MACS_peak_147269	3100	389	NM_017467	Zfp316	3100	28.7	11.62	54201	Emzf1|Mzf3|Znf316
chr5	146470219	146472411	MACS_peak_147660	3100	2192	ENSMUST00000016143	Wasf3	3100	119.35	11.62	245880	Scar3|Wave3
chr6	11933252	11934019	MACS_peak_148662	3100	767	NM_029404	Phf14	3100	17.42	11.62	75725	1110001C23Rik|4932409F11Rik|5730446A07Rik|AA623952|AV297001|mKIAA0783
chr6	30304051	30304539	MACS_peak_149760	3100	488	NM_009459	Ube2h	3100	15.85	11.62	22214	1500009C23Rik|AI181839|AI326965|AI462483|AW227540|E2-20K|Gid3|N28148|Ubc8
chr6	51462497	51463254	MACS_peak_151773	3100	757	ENSMUST00000114459	Hnrnpa2b1	3100	53.75	11.62	53379	9130414A06Rik|Hnrpa2|Hnrpa2b1|hnrnp-A
chr6	86404218	86404522	MACS_peak_154062	3100	304	NM_011585	Tia1	3100	110.05	11.62	21841	2310050N03Rik|AI256674|TIA-1|mTIA-1
chr6	113168086	113171958	MACS_peak_156231	3100	3872	NM_177763	Lhfpl4	3100	26.19	11.62	269788	1190004M23Rik|AI604880|B230384L07|mKIAA4027
chr6	113702100	113702721	MACS_peak_156313	3100	621	uc009dhh.1	Tatdn2	3100	19.01	11.62	381801	AI646012|mKIAA0218
chr6	117716472	117717453	MACS_peak_156806	3100	981	ENSMUST00000101030	Gm7292	3100	143.8	11.62	640370	EG640370
chr6	124913674	124914232	MACS_peak_157605	3100	558	NM_026988	Ptms	3100	35.58	11.62	69202	2610009E16Rik
chr6	136820307	136821376	MACS_peak_158401	3100	1069	uc009emg.2	Wbp11	3100	19.92	11.62	60321	2510026P17Rik|D6Wsu113e|Npwbp|SIPP1
chr6	140623498	140624344	MACS_peak_158653	3100	846	ENSMUST00000087614	Aebp2	3100	48.73	11.62	11569	AU023766|B230313N05Rik
chr7	3629551	3629929	MACS_peak_159408	3100	378	NM_023524	Tfpt	3100	19.05	11.62	69714	2400004F01Rik|AI450389|Amida|FB1
chr7	12774112	12775658	MACS_peak_159787	3100	1546	NM_001017955	Zscan18	3100	26.01	11.62	232875	EG232875
chr7	13037620	13038273	MACS_peak_159839	3100	653	ENSMUST00000005714	Ube2m	3100	26.11	11.62	22192	2510040H03Rik|UBC12|Ubc-rs2
chr7	13258974	13261485	MACS_peak_159846	3100	2511	uc009ffk.1	6330408A02Rik	3100	37.16	11.62	321008	-
chr7	16275562	16276107	MACS_peak_159982	3100	545	NM_172297	Ccdc9	3100	23.72	11.62	243846	2600011L02Rik
chr7	16915378	16916976	MACS_peak_160088	3100	1598	NM_007590	Calm3	3100	17.47	11.62	12315	CaMA|R75142
chr7	16944681	16948828	MACS_peak_160092	3100	4147	NM_001099636	Pnmal2	3100	10.44	11.62	434128	EG434128
chr7	19004064	19006763	MACS_peak_160161	3100	2699	NM_178757	Irf2bp1	3100	49.35	11.62	272359	6330414O09Rik|C530033F24
chr7	24515036	24515682	MACS_peak_160456	3100	646	NM_175142	Zfp428	3100	8.1	11.62	232969	2410005H09Rik|AV271806|AW047854|Znf428
chr7	25754340	25754730	MACS_peak_160653	3100	390	ENSMUST00000043765	Hnrnpul1	3100	19.42	11.62	232989	E130317O14Rik|E1B-AP5|E1BAP5|Hnrnpul|Hnrpul1
chr7	28338351	28338706	MACS_peak_160928	3100	355	uc009fyi.1	Supt5	3100	25.03	11.62	20924	AL033283|AL033321|AU019549|Spt5|Supt5h
chr7	28399521	28401617	MACS_peak_160942	3100	2096	NM_175021	Samd4b	3100	41.83	11.62	233033	BC042901
chr7	28810783	28811168	MACS_peak_160993	3100	385	ENSMUST00000174548	Hnrnpl	3100	40.05	11.62	15388	C79783|D830027H13Rik|Hnrpl
chr7	30306805	30308367	MACS_peak_161257	3100	1562	NM_001081114	Clip3	3100	5.72	11.62	76686	1500005P14Rik|AI844915|Clipr-59
chr7	45376453	45377278	MACS_peak_162151	3100	825	NM_009224	Snrnp70	3100	35.76	11.62	20637	2700022N21Rik|3200002N22Rik|AI325098|R74807|Rnu1p70|Rnulp70|Snrp70|Srnp70|U1-70|U1-70K
chr7	45699842	45700339	MACS_peak_162202	3100	497	ENSMUST00000003360	Car11	3100	39.87	11.62	12348	Ca11
chr7	45798198	45798593	MACS_peak_162217	3100	395	NM_001005511	Lmtk3	3100	35.94	11.62	381983	BC059845|aatyk3
chr7	67758818	67759742	MACS_peak_164411	3100	924	NM_183312	Synm	3100	25.03	11.62	233335	4930412K21Rik|AI852401|Dmn|E130104F11|Syn|Synemin
chr7	74554410	74554780	MACS_peak_164770	3100	370	NM_023908	Slco3a1	3100	32.17	11.62	108116	5830414C08Rik|Anr1|MJAM|OATP-D|R75096|Slc21a11
chr7	121922903	121923468	MACS_peak_169325	3100	565	NM_001033318	Cog7	3100	32.83	11.62	233824	5630400E24Rik|Gm167
chr7	126863168	126864250	MACS_peak_169839	3100	1082	NM_172746	Hirip3	3100	25.68	11.62	233876	B130036O03|C86302
chr7	126883905	126884871	MACS_peak_169843	3100	966	NM_001163774	Taok2	3100	16.49	11.62	381921	1110033K02Rik|B230344N16|MAP3K17|PSK|PSK1|TAO1|TAO2|mKIAA0881
chr7	126950534	126951116	MACS_peak_169855	3100	582	NM_144926	Sez6l2	3100	38.47	11.62	233878	AI835913|AW121566|BSRP-A|Psk1
chr7	141636282	141639874	MACS_peak_171077	3100	3592	ENSMUST00000062451	Muc6	3100	35.88	11.62	353328	-
chr8	8689976	8690537	MACS_peak_171675	3100	561	NM_176849	Arglu1	3100	9.78	11.62	234023	9430010O03Rik|C130008N12
chr8	20122372	20123332	MACS_peak_173311	3100	960	uc029wqt.1	5330429B09Rik	3100	38.67	11.62	NA	NA
chr8	57513965	57514385	MACS_peak_175609	3100	420	NM_008252	Hmgb2	3100	21	11.62	97165	C80539|HMG-2|Hmg2
chr8	72304765	72305276	MACS_peak_176851	3100	511	ENSMUST00000075602	Gm10282	3100	12.99	11.62	100042405	ENSMUSG00000069996
chr8	84704729	84708677	MACS_peak_177941	3100	3948	NM_010906	Nfix	3100	9.85	11.62	18032	CTF|NF-I/X|NF1-X|NFI-X
chr8	84842055	84842844	MACS_peak_177988	3100	789	ENSMUST00000003912	Calr	3100	31.21	11.62	12317	CRT|Calregulin
chr8	85026832	85027234	MACS_peak_178024	3100	402	NM_026760	2310036O22Rik	3100	11.22	11.62	68544	1110002H14Rik|AI854688
chr8	112013601	112015036	MACS_peak_180015	3100	1435	ENSMUST00000071732	Gm6793	3100	52.42	11.62	627828	EG627828
chr8	121578457	121578806	MACS_peak_181122	3100	349	NM_133765	Fbxo31	3100	125.23	11.62	76454	1110003O08Rik|2310046N15Rik|Fbx14|Fbxo14
chr8	122383399	122384004	MACS_peak_181264	3100	605	NM_001029993	Zc3h18	3100	33.9	11.62	76014	1190001B23Rik|5830416A07Rik|Nhn1
chr9	25301411	25301736	MACS_peak_183920	3100	325	uc009opm.1	2022-09-07	3100	11.46	11.62	235072	Cdc10|E430034N22
chr9	62377553	62378812	MACS_peak_187886	3100	1259	ENSMUST00000085519	Anp32a	3100	66.14	11.62	11737	Anp32|I1PP2A|LANP|PHAP1|W91701|pp32
chr9	75445234	75445993	MACS_peak_189276	3100	759	NM_001039522	Leo1	3100	11.97	11.62	235497	Gm185
chr9	88482055	88482559	MACS_peak_189914	3100	504	ENSMUST00000069221	Syncrip	3100	38.78	11.62	56403	2610109K23Rik|4632417O19Rik|GRY-RBP|Nsap1|Nsap1l|pp68
chr9	114705053	114705362	MACS_peak_192373	3100	309	uc009rxx.1	Dync1li1	3100	10.26	11.62	235661	1110053F02Rik|Dnclic1|LIC-1
chrX	7651836	7653256	MACS_peak_193531	3100	1420	NM_009305	Syp	3100	10.32	11.62	20977	A230093K24Rik|AI848995|Syn|p38
chrX	7894518	7894867	MACS_peak_193571	3100	349	NM_019478	Pqbp1	3100	20.68	11.62	54633	PQBP-1|Sfc2|npw38
chrX	68678540	68678867	MACS_peak_195169	3100	327	NM_008031	Fmr1	3100	32.06	11.62	14265	FMRP|Fmr-1
chrX	74303730	74304689	MACS_peak_195517	3100	959	uc029xkr.1	Atp6ap1	3100	26.17	11.62	54411	16A|AC45|AI316502|AW108110|Atp6ip1|Atp6s1|C7-1|CF2|VATPS1|XAP-3|mFLJ00383
chrX	95940298	95940948	MACS_peak_196268	3100	650	NM_152822	Las1l	3100	23.8	11.62	76130	1810030A06Rik|5830482G23Rik
chrX	103185098	103186664	MACS_peak_196601	3100	1566	NM_008671	Nap1l2	3100	21.69	11.62	17954	Bpx
chrX	109004951	109006071	MACS_peak_196946	3100	1120	NM_016710	Hmgn5	3100	14.02	11.62	50887	GARP45|NBP-45|Nsbp1
chrX	136066563	136067207	MACS_peak_197357	3100	644	ENSMUST00000049130	Bex2	3100	15.35	11.62	12069	AL024066|Bex1
chrX	136200974	136201813	MACS_peak_197361	3100	839	NM_177919	Tceal5	3100	15.32	11.62	331532	6430401A05Rik
chrX	136271262	136271978	MACS_peak_197365	3100	716	NM_009750	Ngfrap1	3100	11.14	11.62	12070	AL033356|Bex3|DXWsu67e|Gcap27|Nade
chrX	136733568	136734501	MACS_peak_197391	3100	933	NM_019768	Morf4l2	3100	11.05	11.62	56397	2410017O14Rik|Mrgx|Sid393p|mKIAA0026
chrX	152341539	152342484	MACS_peak_198166	3100	945	NM_029836	Tspyl2	3100	23.31	11.62	52808	CDA1|CINAP|DENTT|DXBwg1396e|DXHXS1008E|E130307F10Rik
chrX	162760371	162760707	MACS_peak_198678	3100	336	NM_009031	Rbbp7	3100	13.17	11.62	245688	AA409861|AI173248|AU019541|BB114024|mRbAp46
chrX	163953316	163953656	MACS_peak_198731	3100	340	NM_178794	Zrsr2	3100	18.05	11.62	22184	35kDa|5031411E02Rik|A230052C13Rik|C77286|U2af1-rs2|URP
chrX	166344552	166345081	MACS_peak_198810	3100	529	NM_001177955	Gpm6b	3100	14.36	11.62	14758	AI593561|Gpm6|M6B
chr10	14523061	14523571	MACS_peak_10910	3100	510	ENSMUST00000096020	Gm10335	3100	8.71	13.56	100039571	ENSMUSG00000071532
chr10	127620617	127621148	MACS_peak_17560	3100	531	NM_008512	Lrp1	3100	19.37	13.56	16971	A2mr|AI316852|CD91|Lrp|b2b1554Clo
chr13	21716411	21716991	MACS_peak_35074	3100	580	ENSMUST00000070124	Hist1h2ai	3100	14.71	13.56	319191	H2a-291A
chr13	54598386	54598833	MACS_peak_36827	3100	447	uc007qoo.1	Cltb	3100	8.04	13.56	74325	2310046E19Rik
chr6	67272138	67273134	MACS_peak_116712	3100	996	uc009cfi.1	Serbp1	3100	8.05	13.56	66870	1200009K13Rik|9330147J08Rik|AL022786|Pairbp1
chr6	124746019	124747989	MACS_peak_120351	3100	1970	NM_007881	Atn1	3100	7.86	13.56	13498	Atr1|Drpla|atrophin-1
chr7	45466219	45466775	MACS_peak_124009	3100	556	uc009gvh.1	Bax	3100	11.83	13.56	12028	-
chr8	70868226	70868645	MACS_peak_135100	3100	419	NM_026964	Ccdc124	3100	25.11	13.56	234388	1810023B24Rik
chr1	169743532	169743920	MACS_peak_9568	3100	388	NM_009062	Rgs4	3100	18.06	12.9	19736	AA004315|AA597169|ESTM48|ESTM50
chr10	25501823	25502387	MACS_peak_12793	3100	564	NM_013511	Epb4.1l2	3100	16.29	12.9	NA	NA
chr10	115315193	115315591	MACS_peak_18893	3100	398	NM_024454	Rab21	3100	27.77	12.9	216344	9630024B22
chr11	87358448	87359023	MACS_peak_26859	3100	575	ENSMUST00000055438	Ppm1e	3100	27.08	12.9	320472	AW049266|B930008A12Rik|POPX1|PP2CH|mKIAA1072
chr11	106247491	106248689	MACS_peak_28620	3100	1198	NM_028074	Ddx42	3100	21.38	12.9	72047	1810047H21Rik|AW319508|AW556242|B430002H05Rik|RHELP|RNAHP|SF3b125
chr13	49146551	49147234	MACS_peak_40935	3100	683	NM_029361	Wnk2	3100	19.44	12.9	75607	1810073P09Rik|AW122246|ESTM15|X83337|mKIAA1760
chr13	58126723	58128556	MACS_peak_41681	3100	1833	NM_029872	Hnrnpa0	3100	7.66	12.9	77134	1110055B05Rik|3010025E17Rik|Hnrpa0|hnRNP A0
chr14	12822303	12823079	MACS_peak_45341	3100	776	NM_012061	Cadps	3100	18.91	12.9	27062	AU067781|CAPS|CAPS1|mKIAA1121
chr15	87544298	87544603	MACS_peak_57404	3100	305	NM_001252310	Fam19a5	3100	48.24	12.9	106014	TAFA5|Tafa-5|Tara-5
chr17	34603333	34603690	MACS_peak_68907	3100	357	ENSMUST00000015622	Rnf5	3100	23.16	12.9	54197	2410131O05Rik|AA407576|NG2
chr2	80580857	80581380	MACS_peak_88054	3100	523	ENSMUST00000111760	Nckap1	3100	14.66	12.9	50884	C79304|H19|Hem-2|Hem2|Nap1|mKIAA0587|mh19|p125Nap1
chr3	18054324	18056570	MACS_peak_96227	3100	2246	NM_021560	Bhlhe22	3100	11.24	12.9	59058	Beta3|Bhlhb5
chr4	129513580	129513916	MACS_peak_112129	3100	336	NM_010807	Marcksl1	3100	5.46	12.9	17357	AL022768|AW215397|AW536807|D4Bc1|F52|MacMARCKS|Macs2|Macs3|Mlp|Mrp
chr4	134473331	134473843	MACS_peak_112726	3100	512	NM_019641	Stmn1	3100	9.31	12.9	16765	19k|Lag|Lap18|Op18|P18|P19|Pig|Pp17|Pp18|Pp19|Pr22|Smn
chr7	28398825	28399331	MACS_peak_138435	3100	506	NM_019458	Paf1	3100	31.04	12.9	54624	5730511K23Rik|AA675045
chr7	89338447	89338787	MACS_peak_142738	3100	340	NM_028343	Tmem135	3100	32.63	12.9	72759	2810439K08Rik|AW319712|PMP52
chr8	120568160	120568483	MACS_peak_156064	3100	323	NM_198671	Gse1	3100	50.22	12.9	382034	2210013I18Rik|mKIAA0182
chrX	74304997	74305441	MACS_peak_168348	3100	444	ENSMUST00000015435	Gdi1	3100	18.07	12.9	14567	GDIA|GDIalpha
chrX	102068635	102070043	MACS_peak_169141	3100	1408	NM_001278534	Rgag4	3100	42.02	12.9	331474	6430402L03Rik|Mar5|Mart5|mKIAA2001
chrX	129749746	129750116	MACS_peak_169699	3100	370	NM_172493	Diap2	3100	37.74	12.9	NA	NA
chr4	43663796	43664398	MACS_peak_106219	3073.2	602	uc008squ.1	Fam221b	3073.2	15.63	13.17	242408	4930412F15Rik
chr1	42697145	42699914	MACS_peak_2351	3071.82	2769	NM_008900	Pou3f3	3071.82	12.78	13.15	18993	Brn-1|Brn1|Otf8|Skin1
chr2	79453842	79455048	MACS_peak_102456	3059.65	1206	NM_010894	Neurod1	3059.65	33.2	11.8	18012	BETA2|BHF-1|Neurod|bHLHa3
chr11	6473783	6476076	MACS_peak_20624	3056.61	2293	NM_011221	Purb	3056.61	11.8	13.05	19291	2310015K15Rik|AA114818|Cager-2|D11Bwg0414e
chr5	52184467	52184903	MACS_peak_138723	3027.03	436	NM_007839	Dhx15	3027.03	19.95	11.7	13204	DBP1|DEAH9|Ddx15|HRH2|mDEAH9
chr7	127511705	127512780	MACS_peak_169916	3023.83	1075	uc009jvt.2	1700008J07Rik	3023.83	29.34	11.69	629159	AW048743
chr17	35135717	35136235	MACS_peak_80204	3015.41	518	ENSMUST00000174478	Bag6	3015.41	11.85	11.65	224727	2410045D21Rik|AA408914|BAG-6|Bat3|D17H6S52E|G3|Scythe
chr15	83153493	83154722	MACS_peak_56881	3004.19	1229	ENSMUST00000018186	Cyb5r3	3004.19	11.46	13.14	109754	0610016L08Rik|2500002N19Rik|C85115|Dia-1|Dia1|WU:AL591952.1-001|WU:AL591952.1-002|WU:AL591952.1-003|WU:Cyb5r3
chr9	73011929	73013385	MACS_peak_189157	2983.9	1456	NM_001114328	Ccpg1	2983.9	11.56	11.73	72278	1700030B06Rik|1810073J13Rik|9430028F23Rik|AI426686|AI875170|CPR8|D9Ertd392e
chr4	76449642	76449980	MACS_peak_125957	2980.75	338	ENSMUST00000107289	Ptprd	2980.75	21.63	11.72	19266	1110002J03Rik|3000002J10Rik|B230219D21Rik|R-PTP-delta
chr8	84028469	84030118	MACS_peak_177775	2976.34	1649	NM_028877	Palm3	2976.34	13.44	11.69	74337	4432412L15Rik|AL024300
chr2	127595663	127596057	MACS_peak_90790	2939.53	394	uc008mft.1	Mrps5	2939.53	14.47	13.01	77721	1620401I16Rik|AI850294
chr18	36797878	36799068	MACS_peak_86787	2938.28	1190	NM_025594	Zmat2	2938.28	19.35	11.53	66492	2610510D14Rik|2900082I05Rik
chr4	17853090	17853487	MACS_peak_122007	2917.33	397	ENSMUST00000142434	Mmp16	2917.33	13.9	11.4	17389	MT-MMP 3|MT3-MMP|Mt3mmp
chr13	57427356	57429485	MACS_peak_41553	2910.4	2129	NM_009262	Spock1	2910.4	25.51	13.1	20745	Spock|Ticn1|testican
chr17	32336284	32336738	MACS_peak_79870	2908.79	454	NM_017476	Akap8l	2908.79	12.53	11.38	54194	HAP95|Nakap95
chr11	95748999	95750111	MACS_peak_27436	2906.24	1112	uc007laq.1	Zfp652	2906.24	12.86	13.23	268469	9530033F24Rik|ZNF652
chr8	94179822	94180327	MACS_peak_136666	2900.18	505	uc009mvx.2	Mt1	2900.18	5.37	13.98	17748	MT-I|Mt-1
chr3	60877165	60878839	MACS_peak_114762	2861.07	1674	ENSMUST00000099086	Gm8325	2861.07	17.97	11.54	666853	EG666853
chr16	24529313	24530840	MACS_peak_54535	2859.88	1527	uc029swq.1	A730098P11Rik	2859.88	26.63	13.98	NA	NA
chr5	36484587	36486567	MACS_peak_118210	2847.58	1980	NM_025725	Ccdc96	2847.58	26.1	13.46	66717	4921513E08Rik
chr11	95414097	95414404	MACS_peak_31751	2837.5	307	ENSMUST00000107722	Spop	2837.5	39.79	11.54	20747	AI315626|Pcif1|TEF2
chr1	75431330	75432319	MACS_peak_5167	2819.64	989	ENSMUST00000087122	Speg	2819.64	29.58	11.45	11790	AW125581|Apeg1|BPEG|D1Bwg1450e|SPEGalpha|SPEGbeta|mKIAA1297
chr11	78245547	78245987	MACS_peak_29876	2810.69	440	ENSMUST00000002121	Supt6	2810.69	20.6	11.42	20926	5131400N11Rik|AI132449|SPT6|Supt6h|mKIAA0162
chr7	3630844	3631421	MACS_peak_136994	2753.91	577	uc009evh.1	Prpf31	2753.91	17.78	13.45	68988	1500019O16Rik|2810404O06Rik|AW554706|PRP31|RP11
chr2	180658384	180662583	MACS_peak_111366	2750.29	4199	NM_175551	Dido1	2750.29	20.41	11.3	23856	6720461J16Rik|D130048F08Rik|DATF-1|DIO-1|Datf1|dido
chrX	93288542	93289425	MACS_peak_196086	2745.66	883	NM_007492	Arx	2745.66	15.11	11.26	11878	-
chr19	31082840	31085866	MACS_peak_93289	2736.72	3026	NM_031249	Cstf2t	2736.72	13.82	11.23	83410	64kDa|C77975|tCstF-64|tauCstF-64
chr11	52403045	52403583	MACS_peak_23193	2735.18	538	uc007ivn.1	9530068E07Rik	2735.18	12.92	13.31	213673	C85061|Kct2
chr5	14668964	14669675	MACS_peak_134914	2732.41	711	NM_011995	Pclo	2732.41	6.26	11.39	26875	Acz|Pico
chr2	119269240	119270381	MACS_peak_104868	2718.29	1141	NM_145530	Rhov	2718.29	28.43	11.34	228543	A030005A06Rik|Arhv
chr7	16875316	16875673	MACS_peak_137600	2713.6	357	NM_001081655	Dact3	2713.6	37.4	13.2	629378	EG666671|naa-3
chr14	20347793	20348121	MACS_peak_45771	2700.51	328	NM_027475	Ecd	2700.51	16.15	13.17	70601	5730461K03Rik|Hsgt1
chr5	123253787	123254758	MACS_peak_144474	2671.66	971	ENSMUST00000121964	Wdr66	2671.66	33.56	11.27	269701	4930415N18Rik|4933428F06Rik|5031404N07
chr12	91567539	91567860	MACS_peak_42110	2667.54	321	NM_031391	Gtf2a1	2667.54	20.72	11.24	83602	6330549H03Rik|AA536742|AA959775|AW060250|TfIIAa/b|Tfiia1
chr17	80290055	80290476	MACS_peak_83281	2665.34	421	NM_198942	Dhx57	2665.34	19.93	11.23	106794	AW494914
chr10	13128334	13129201	MACS_peak_14338	2655.32	867	NM_009538	Plagl1	2655.32	14.81	11.26	22634	Lot1|Zac1
chr3	90225508	90225898	MACS_peak_116668	2639.15	390	NM_026677	Rab13	2639.15	49.16	11.22	68328	0610007N03Rik|B230212B15Rik
chr2	85061887	85064016	MACS_peak_102716	2619	2129	NM_001081260	Tnks1bp1	2619	11.74	11.12	228140	Tab182|mKIAA1741
chr1	143702493	143702893	MACS_peak_9352	2615.38	400	ENSMUST00000018337	Cdc73	2615.38	34.02	11.06	214498	8430414L16Rik|C130030P16Rik|C81219|Hrpt2
chr3	96184638	96185607	MACS_peak_117059	2608.24	969	NM_022030	Sv2a	2608.24	11.16	11.02	64051	AI746429|mKIAA0736
chr5	37124876	37125275	MACS_peak_137703	2573.8	399	NM_178394	Jakmip1	2573.8	20.89	11.25	76071	5830437M04Rik|C330021K24Rik|Gababrbp|Marlin-1
chr3	9004404	9004704	MACS_peak_95887	2571.52	300	ENSMUST00000120143	Tpd52	2571.52	24.03	13.21	21985	AI043038|mD52
chr7	46099589	46100237	MACS_peak_139670	2536.65	648	NM_010602	Kcnj11	2536.65	97.86	12.91	16514	Kir6.2|mBIR
chr6	118404579	118405340	MACS_peak_156881	2533.87	761	NM_194339	Bms1	2533.87	20.36	11.22	213895	AA408648|AU020092|AU043373|BB007109|BC030906|Bms1l|mKIAA0187
chrX	104200632	104201185	MACS_peak_169328	2533.83	553	ENSMUST00000118314	C77370	2533.83	12.51	12.84	245555	A230051P11|C77386|Kiaa2022|Xpn|mKIAA2022
chr9	21424907	21425256	MACS_peak_183594	2519.11	349	NM_007871	Dnm2	2519.11	16.46	11.33	13430	Dyn2|Udnm|b2b2159Clo
chr11	102393402	102393782	MACS_peak_28132	2518.76	380	NM_016759	Rundc3a	2518.76	12.23	12.76	51799	RPIP-8|Rap2ip|Rpip8
chr11	70725887	70726502	MACS_peak_21934	2517.05	615	NM_153103	Kif1c	2517.05	18.47	13.36	16562	B430105J22Rik|D11Bwg1349e|Ltxs1|Orch3
chr3	54807198	54807791	MACS_peak_114281	2507.38	593	NM_133231	Rfxap	2507.38	8.88	11.43	170767	5730495K23Rik
chr14	12153657	12154426	MACS_peak_52657	2503.61	769	NM_008981	Ptprg	2503.61	14.73	11.41	19270	5430405N12Rik|AW046354|AW549872|RPTPgamma
chr5	115300512	115300912	MACS_peak_143306	2493.65	400	ENSMUST00000112090	Dynll1	2493.65	9.26	11.42	56455	Dlc8|Dnclc1|Pin
chr2	26964051	26964386	MACS_peak_97904	2493.47	335	NM_207234	Rexo4	2493.47	13.37	11.4	227656	Gm111|Rex4|Xpmc2h
chr18	15061767	15063582	MACS_peak_85184	2476.36	1815	NM_001142731	Kctd1	2476.36	37.81	11.48	106931	4933402K10Rik|AI661543|AW553000
chr1	93343229	93343711	MACS_peak_4893	2471.73	482	ENSMUST00000027494	Ppp1r7	2471.73	29.71	13.24	66385	2310014J01Rik|SDS22
chr10	91171037	91171619	MACS_peak_20757	2456.85	582	NM_011605	Tmpo	2456.85	15.17	11.36	21917	5630400D24Rik|AI195756|AI606875|AW214352|AW547477|LAP2|TP
chr5	142817271	142817662	MACS_peak_147220	2446.01	391	ENSMUST00000151477	Tnrc18	2446.01	30.35	11.3	231861	BC025631|EG381742|Zfp469
chr2	152394802	152398063	MACS_peak_92650	2445.8	3261	ENSMUST00000182625	Sox12	2445.8	15.23	12.61	20667	2010205A02Rik
chrX	159414571	159414892	MACS_peak_198433	2426.41	321	ENSMUST00000112471	Map7d2	2426.41	21.44	11.22	78283	1600028E09Rik|2900002G04Rik|5330432J06Rik|C030036K04Rik|Mtap7d2
chr8	123373710	123374064	MACS_peak_156439	2420.57	354	NM_025804	Tcf25	2420.57	11.01	12.59	66855	1100001J13Rik|1810041K11Rik|D8Ertd325e|Nulp1|mKIAA1049
chr4	148960968	148961794	MACS_peak_114256	2384.65	826	NM_019781	Pex14	2384.65	27.62	12.78	56273	Pex14p|R75137
chr8	111720294	111721331	MACS_peak_179962	2373.97	1037	uc009nmw.2	Bcar1	2373.97	18.93	11.25	12927	AI385681|Cas|Crkas
chr15	38518908	38519266	MACS_peak_63036	2369.54	358	NM_018745	Azin1	2369.54	16.66	11.22	54375	1700085L02Rik|AZI|Oazi|Oazin
chr15	78428563	78428867	MACS_peak_65699	2350.96	304	NM_001289671	Kctd17	2350.96	14.86	11.23	72844	2900008M13Rik|AA414907|AW742389|N28155
chr9	65794621	65795495	MACS_peak_162365	2347.21	874	NM_172536	Zfp609	2347.21	10.6	12.67	214812	9830165N24|BC016271|Znf609|mKIAA0295
chr16	36911871	36917000	MACS_peak_72441	2341.67	5129	NM_030035	Golgb1	2341.67	15.83	11.2	224139	4930428L02Rik|628101|6330407A06Rik|AU042952|C130074L01Rik|F730017E11Rik|Gm6840|mKIAA4151
chr7	45866111	45867129	MACS_peak_139638	2339.94	1018	ENSMUST00000002848	Grin2d	2339.94	47.36	12.61	14814	GluN2D|NMDAR2D|NR2D
chr8	83997671	83998565	MACS_peak_177772	2327.03	894	NM_001081415	Samd1	2327.03	13.14	11.1	666704	AA589507
chr19	47733518	47733911	MACS_peak_94891	2325.05	393	NM_026377	Sfr1	2325.05	9.34	11.09	67788	6330577E15Rik|Meir5
chr8	121907065	121907694	MACS_peak_156173	2298.98	629	ENSMUST00000045557	Slc7a5	2298.98	17.11	12.99	20539	4F2LC|D0H16S474E|LAT1|TA1
chr11	112784671	112785929	MACS_peak_29189	2294.11	1258	NM_011448	Sox9	2294.11	12.76	12.95	20682	2010306G03Rik|AV220920|mKIAA4243
chrX	7922047	7922514	MACS_peak_166760	2289.62	467	NM_013892	Pcsk1n	2289.62	6.91	12.9	30052	AI848336|KEP|PEN|PEN19|PEN20|Pan3|SAAS|SAASCT|bLEN|lLEN|proSAAS
chr12	116255650	116256251	MACS_peak_43974	2280.5	601	uc007phm.1	Wdr60	2280.5	16.67	11.17	217935	D430033N04Rik
chr3	152817136	152819858	MACS_peak_120581	2273.93	2722	ENSMUST00000044278	St6galnac5	2273.93	45.96	11.13	26938	AI851940|Siat7e
chr7	127198390	127199212	MACS_peak_169872	2247.39	822	NM_144522	Tbc1d10b	2247.39	14.88	11.1	68449	1110003P22Rik|C87963
chr15	78966293	78968711	MACS_peak_56257	2239.58	2418	NM_001039155	Triobp	2239.58	13.94	12.78	110253	AI428493|EST478828|Tara|mKIAA1662
chr14	60378285	60380926	MACS_peak_48820	2235.84	2641	NM_028113	Amer2	2235.84	14.95	12.75	72125	2600011E07Rik|Fam123a
chrX	48378943	48379330	MACS_peak_194663	2225.76	387	NM_178782	Bcorl1	2225.76	16.41	11.36	320376	6720425J07Rik|B930011H20Rik
chr7	131966459	131967595	MACS_peak_170280	2208.34	1136	NM_173410	Gpr26	2208.34	21.79	11.34	233919	9630036A11Rik|A730021D22
chr19	43674475	43674881	MACS_peak_81107	2197.06	406	NM_145156	Slc25a28	2197.06	53.85	12.77	246696	2210403D18Rik|Mfrn2|Mrs3/4
chr14	25646716	25647357	MACS_peak_54033	2192.95	641	uc007srm.2	Zmiz1	2192.95	13.04	11.26	328365	BC065120|E330020C23|ENSMUSG00000072684|Gm10397|I920194n01|Rai17|Zimp10
chr4	49649962	49650327	MACS_peak_124594	2175.3	365	NM_182999	Rnf20	2175.3	15.1	11.28	109331	4833430L21Rik|AW540162|C79397|mKIAA4116
chr11	116078572	116079596	MACS_peak_29627	2161.77	1024	NM_016852	Wbp2	2161.77	12	12.92	22378	-
chr16	32644642	32645108	MACS_peak_71752	2159.48	466	NM_016788	Tnk2	2159.48	15.03	11.29	51789	Ack|Ack-1|Ack1|Cdgip|Pyk1
chr7	127530439	127530798	MACS_peak_169921	2153.4	359	NM_001304266	Srcap	2153.4	11.06	11.35	100043597	B930091H02Rik|D030022P06Rik|F630004O05Rik
chr4	154019630	154021513	MACS_peak_133926	2068.66	1883	ENSMUST00000169622	Lrrc47	2068.66	23.49	11.48	72946	2900010D03Rik|AA960559|mKIAA1185
chr4	21873585	21874752	MACS_peak_122285	2067.59	1167	ENSMUST00000098238	Sfrs18	2067.59	8.46	11.46	NA	NA
chr11	101425084	101425610	MACS_peak_28036	2060	526	NM_172566	Rundc1	2060	28.59	13.04	217201	AW125546|D930024B17
chr11	35979970	35980527	MACS_peak_22181	2059.27	557	ENSMUST00000018993	Wwc1	2059.27	8.85	13.02	211652	AA408228|AU017197|BC037006|Kibra|mKIAA0869
chr18	33184760	33185425	MACS_peak_86345	2052.63	665	NM_009793	Camk4	2052.63	11.51	11.48	12326	A430110E23Rik|AI666733|CaMKIV|CaMKIV/Gr|D18Bwg0362e
chr17	47010141	47010532	MACS_peak_69590	2046.2	391	NM_146078	Ubr2	2046.2	11.6	13.18	224826	9930021A08Rik|AI462103|AW540746|E130209G04Rik|ENSMUSG00000043296|mKIAA0349
chr3	9250566	9252080	MACS_peak_95890	2044.61	1514	NM_177660	Zbtb10	2044.61	27.48	13.17	229055	4832414A18|AU021107|RINZF
chr15	25780973	25781864	MACS_peak_61984	2035.34	891	NM_019472	Myo10	2035.34	15.2	11.47	17909	AW048724|D15Ertd600e|mKIAA0799
chr5	122501567	122502225	MACS_peak_124082	2019.84	658	NM_009722	Atp2a2	2019.84	14.29	13.24	11938	9530097L16Rik|D5Wsu150e|SERCA2|SERCA2B|Serca2a|mKIAA4195
chr11	109650162	109650624	MACS_peak_33523	2017.81	462	uc007mct.2	Prkar1a	2017.81	11.31	11.48	19084	1300018C22Rik|RIalpha|Tse-1|Tse1
chr15	10461119	10461424	MACS_peak_61439	2014.13	305	NM_030046	Dnajc21	2014.13	25.3	11.46	78244	4930461P20Rik|9930116P15Rik
chr16	11134267	11134650	MACS_peak_60063	2012.74	383	ENSMUST00000038424	Txndc11	2012.74	19.15	13.2	106200	2810408E11Rik|AI427833|EFP1|Txdc11
chr3	94582244	94582716	MACS_peak_100120	1999.83	472	NM_029721	Snx27	1999.83	12.89	13.39	76742	5730552M22Rik|ESTM45|ESTM47|R75405
chr16	97490471	97491120	MACS_peak_76694	1991.6	649	ENSMUST00000177820	Gm9242	1991.6	67.67	11.42	668559	EG668559
chr11	77686138	77686507	MACS_peak_29764	1969.1	369	NM_001024205	Nufip2	1969.1	12	11.46	68564	1110001M19Rik|9530056D24Rik|AI256692|AI461731|PIG1|mKIAA1321
chr11	69837047	69837784	MACS_peak_24776	1968.11	737	uc007jrx.1	Nlgn2	1968.11	14.09	13.64	216856	NL2
chr15	99126577	99126887	MACS_peak_68102	1953.94	310	ENSMUST00000063517	Spats2	1953.94	18.33	11.41	72572	2700012F11Rik|59kDa|Scr59|p59
chr5	129501250	129502539	MACS_peak_145163	1936.51	1289	uc008zsw.1	Sfswap	1936.51	23.04	11.51	231769	1190005N23Rik|6330437E22Rik|AI197402|AW212079|SWAP|Sfrs8|Srsf8
chr8	84565947	84566393	MACS_peak_153335	1926.34	446	NM_007578	Cacna1a	1926.34	9.92	13.68	12286	APCA|BI|Caca1a|Cacnl1a4|Cav2.1|Ccha1a|EA2|FHM|HPCA|MHP|MHP1|SCA6|alpha1A|la|nmf352|rkr|smrl|tg
chr17	32316186	32316715	MACS_peak_79863	1921.06	529	uc012aox.1	Akap8	1921.06	19.14	11.58	56399	1200016A02Rik|AA673585|AKAP-8|AKAP95|AU015639
chr17	35850294	35851005	MACS_peak_80250	1918.77	711	NM_001010833	Mdc1	1918.77	21.87	11.56	240087	6820401C03|AA413496|Nfbd1|mKIAA0170
chr7	28962018	28962340	MACS_peak_138502	1917.01	322	ENSMUST00000068045	Actn4	1917.01	16.27	13.64	60595	C77391
chr6	29372470	29372829	MACS_peak_149595	1914.72	359	ENSMUST00000156163	Calu	1914.72	11.37	11.53	12321	9530075H20Rik
chr16	39984370	39984727	MACS_peak_62602	1914.38	357	uc007zfr.1	Lsamp	1914.38	22.71	13.63	268890	5430428I19|AW046674|B130007O04Rik|D930023J12Rik|Lam|Lamp
chr11	106036871	106037261	MACS_peak_28569	1911.25	390	NM_027946	Dcaf7	1911.25	11.07	13.6	71833	1700012F10Rik|2610037L01Rik|C86529|HAN11|Wdr68
chr8	33386324	33387531	MACS_peak_150258	1903.26	1207	ENSMUST00000070340	Purg	1903.26	14.75	13.57	75029	4930486B15Rik
chr11	68699209	68699585	MACS_peak_28638	1888.13	376	NM_175260	Myh10	1888.13	12.81	11.51	77579	5730504C04Rik|9330167F11Rik|Fltn|Myhn-2|Myhn2|NMHC II-B|NMHC-B|NMHCII-B|NMMHC II-b|NMMHC-B|NMMHC-IIB|SMemb|mKIAA3005
chr6	34745618	34746639	MACS_peak_150369	1881.52	1021	ENSMUST00000115027	Cald1	1881.52	8.37	11.48	109624	4833423D12Rik|AI195384|AV071549|AW536160|C920027I18Rik
chr15	81936981	81937313	MACS_peak_50504	1879.27	332	ENSMUST00000135663	Csdc2	1879.27	15.81	12	105859	AI415250|AI481750|Pippin
chr13	58215283	58215653	MACS_peak_41700	1871.02	370	NM_026842	Ubqln1	1871.02	9.9	13.29	56085	1110046H03Rik|1810030E05Rik|AU019746|C77538|D13Ertd372e|Da41|Dsk2|Plic-1|Plic1|Xdrp1
chr3	103279654	103280446	MACS_peak_117604	1864.51	792	NM_053170	Trim33	1864.51	20.76	11.48	94093	8030451N04Rik|AI413936|Ecto|Tif1g
chr2	117270605	117271426	MACS_peak_104709	1858.5	821	NM_026620	Fam98b	1858.5	23.68	11.49	68215	2610510H03Rik
chr8	117257018	117257401	MACS_peak_137994	1850.58	383	NM_001163262	Cmip	1850.58	7.89	11.84	74440	4933407C03Rik|5830471E12Rik|AI314065|AI464126
chr7	44246786	44247904	MACS_peak_161947	1845.91	1118	uc009gox.2	2410002F23Rik	1845.91	14.16	11.43	668661	-
chr7	127748146	127748450	MACS_peak_169952	1844.85	304	uc009jwp.1	Fbxl19	1844.85	8.95	11.41	233902	6030430O11|BC059812|Fbl19
chr11	120780744	120781903	MACS_peak_30531	1843.18	1159	NM_009053	Rfng	1843.18	9.09	13.25	19719	-
chr9	49506852	49507653	MACS_peak_186617	1843.16	801	NM_001113204	Ncam1	1843.16	9.07	11.53	17967	CD56|E-NCAM|NCAM-1|Ncam
chr1	135363669	135364426	MACS_peak_9037	1839.04	757	NM_053106	Lmod1	1839.04	29.31	11.51	93689	9530015K06Rik|SM-Lmod
chr15	12833828	12834662	MACS_peak_52709	1837.63	834	NM_026799	Drosha	1837.63	8.19	13.31	14000	1110013A17Rik|AI874853|Etohi2|Rn3|Rnasen
chr12	112959861	112960358	MACS_peak_37987	1832.77	497	NM_028193	Brf1	1832.77	23.44	13.28	72308	2510002F24Rik|GTF3B|TAF3C|TAFIII90|TFIIIB90|mTFIIIB90
chr7	105573681	105574416	MACS_peak_144343	1829.84	735	NM_009685	Apbb1	1829.84	10.33	13.26	11785	Fe65|Rir
chr12	75595634	75596200	MACS_peak_34559	1820.94	566	NM_012024	Ppp2r5e	1820.94	12.3	13.22	26932	4633401M22Rik|AI449017|B56beta
chr15	76656359	76656920	MACS_peak_55961	1819.83	561	ENSMUST00000176274	Cyhr1	1819.83	16.89	13.21	54151	1110031M01Rik|AU042374|Chrp
chr17	84958000	84958394	MACS_peak_83707	1817.16	394	NM_011151	Ppm1b	1817.16	18.27	11.47	19043	PP2CB
chr6	112946429	112947266	MACS_peak_119290	1815.08	837	NM_080448	Srgap3	1815.08	4.9	11.87	259302	AI452337|Arhgap14|D130026O08Rik|Gbi|MEGAP|WRP|mKIAA0411
chr7	118852402	118853340	MACS_peak_169120	1813.11	938	NM_023197	Knop1	1813.11	12.3	11.49	66356	2310008H09Rik|Tsg118
chr12	76327565	76329914	MACS_peak_40085	1811.86	2349	NM_001101471	Akap5	1811.86	10.79	11.48	238276	3526401B18Rik|AKAP 150|AKAP-5|AKAP150|BB098886|Gm258|P150
chr16	35154876	35157235	MACS_peak_72209	1811.43	2359	ENSMUST00000114913	Adcy5	1811.43	19.02	11.47	224129	AW121902|Ac5
chr12	41485570	41486057	MACS_peak_38045	1805.41	487	NM_010733	Lrrn3	1805.41	17.75	11.55	16981	NLRR-3
chr15	77306363	77307053	MACS_peak_56094	1805.27	690	NM_053104	Rbfox2	1805.27	12.23	13.09	93686	Fbm2|Fxh|Hrnbp2|Rbm9
chr2	25889440	25890428	MACS_peak_97789	1804.6	988	uc008itq.1	Kcnt1	1804.6	58.78	11.54	227632	C030030G16Rik|Slack|Slo2.2|slo2
chr15	78935185	78935694	MACS_peak_65769	1798.75	509	ENSMUST00000145157	Nol12	1798.75	14.16	11.5	97961	C78541|Nop25
chr5	125047801	125048534	MACS_peak_144825	1795.89	733	uc008zrc.1	Ncor2	1795.89	12.06	11.48	20602	N-CoR|SMRT|SMRTe
chr5	137030965	137033351	MACS_peak_126057	1794.85	2386	NM_001039385	Vgf	1794.85	17.99	13.02	381677	Gm1052
chr1	156366039	156366484	MACS_peak_10031	1792.31	445	ENSMUST00000102782	Gm2000	1792.31	8.9	11.45	100038991	-
chr2	144473435	144475089	MACS_peak_107402	1772.97	1654	NM_172859	Dzank1	1772.97	34.2	11.49	241688	2810039F03Rik|6330439K17Rik|6430408C01|AI851115|Ankrd64
chr7	142575531	142578146	MACS_peak_171144	1772.53	2615	uc012fxn.1	H19	1772.53	15.32	11.48	14955	AI747191
chr5	102069595	102069921	MACS_peak_141703	1770.91	326	NM_172882	Wdfy3	1770.91	15.29	11.52	72145	2610509D04Rik|ALFY|AW319683|B930017C24|BWF1|Bchs|D5Ertd66e|Ggtb3|ZFYVE25|mKIAA0993
chr5	137734839	137736354	MACS_peak_146594	1764.72	1515	NM_175521	Nyap1	1764.72	9.85	11.53	243300	6430598A04Rik
chr19	29648035	29648420	MACS_peak_93182	1762.09	385	NM_001081213	Ermp1	1762.09	18.46	11.51	226090	D19Ertd410e|D19Wsu12e|Fxna|mKIAA1815
chr3	87914901	87916132	MACS_peak_116279	1759.86	1231	NM_008231	Hdgf	1759.86	11.85	11.5	15191	AI118077|D3Ertd299e
chr10	128401394	128401923	MACS_peak_23357	1752.66	529	NM_027257	Nabp2	1752.66	11.35	11.45	69917	2610036N15Rik|Obfc2b|SSB1
chr17	33911237	33912069	MACS_peak_80073	1750.92	832	NM_007829	Daxx	1750.92	21.77	11.44	13163	-
chr10	43173975	43174530	MACS_peak_16341	1748.62	555	NM_175407	Sobp	1748.62	5.82	11.42	109205	2900009C16Rik|5330439J01Rik|JXC1|jc
chr18	5772434	5773184	MACS_peak_72845	1744.5	750	NM_011546	Zeb1	1744.5	9.99	12.9	21417	3110032K11Rik|AREB6|BZP|MEB1|Nil2|TCF-8|Tcf18|Tcf8|Tw|ZEB|Zfhep|Zfhx1a|Zfx1a|Zfx1ha|[delta]EF1
chr12	85028769	85030887	MACS_peak_41286	1743.96	2118	NM_178363	Ylpm1	1743.96	8.86	11.47	56531	A930013E17Rik|ZAP|Zap3
chr11	101738129	101738561	MACS_peak_32387	1741.11	432	NM_144831	Dhx8	1741.11	12.56	11.51	217207	Ddx8|mDEAH6|mKIAA4096
chr1	174501824	174503591	MACS_peak_9870	1739.07	1767	NM_019445	Fmn2	1739.07	19.42	12.79	54418	AU024104
chr8	26027568	26028305	MACS_peak_173740	1733.84	737	NM_207659	Hook3	1733.84	18.72	11.56	320191	5830454D03Rik|AI317159|E330005F07Rik
chr6	58905314	58907126	MACS_peak_152336	1730.25	1812	NM_021432	Nap1l5	1730.25	11.18	11.55	58243	1110020M21Rik
chr18	86394951	86395910	MACS_peak_78231	1726.64	959	NM_144946	Neto1	1726.64	30.41	12.74	246317	AI851453|Btcl1|C130005O10Rik
chr17	56575354	56576012	MACS_peak_70201	1708.2	658	NM_001029979	Safb2	1708.2	14.9	13	224902	AA389433|AI255170|mKIAA0138
chrX	37095521	37095822	MACS_peak_194273	1708.18	301	NM_026573	Upf3b	1708.18	12.6	11.49	68134	5730594O13Rik|AI317193|AW541158|RENT3B|UPF3X
chr3	84190323	84191236	MACS_peak_99313	1705.38	913	uc008pqa.2	Trim2	1705.38	7.7	12.93	80890	mKIAA0517|narf
chr5	98185023	98187348	MACS_peak_121385	1694.07	2325	NM_029947	Prdm8	1694.07	13.89	13.04	77630	4930565F05Rik|PFM5
chr5	135216589	135218294	MACS_peak_146182	1689.53	1705	NM_011714	Baz1b	1689.53	11.79	11.46	22385	C87820|WSTF|Wbscr9
chr10	80115802	80116907	MACS_peak_19212	1686.73	1105	NM_011492	Stk11	1686.73	10.05	11.49	20869	AA408040|Lkb1|Par-4|R75140
chr2	84650320	84650745	MACS_peak_102672	1677.89	425	ENSMUST00000111675	Ctnnd1	1677.89	12.67	11.41	12388	AA409437|AU019353|Catns|Ctnnd|P120|mKIAA0384
chr15	55071846	55072152	MACS_peak_54641	1675.03	306	NM_001081288	Taf2	1675.03	12.36	13.35	319944	150kDa|4732460C16Rik|AI425886|CIF150|TAF2B|TAFII-150|TAFII150
chr11	5081833	5082433	MACS_peak_23797	1671.9	600	NM_001283063	Ewsr1	1671.9	18.17	11.44	14030	Ews|Ewsh
chr4	33247947	33248787	MACS_peak_105274	1668.27	840	NM_001033225	Pnrc1	1668.27	8.84	13.28	108767	5730463C12Rik|B4-2|PRR2|Prol2
chr11	100956773	100959325	MACS_peak_32306	1664.24	2552	NM_008986	Ptrf	1664.24	17.88	11.61	19285	2310075E07Rik|AW546441|Cav-p60|Cavin
chr4	123350204	123351145	MACS_peak_129858	1656.94	941	NM_001199136	Macf1	1656.94	13.23	11.72	11426	ABP620|Acf7|Aclp7|MACF|R74989|mKIAA0465
chr8	64692642	64693040	MACS_peak_134539	1656.06	398	NM_013494	Cpe	1656.06	7.12	11.37	12876	CPH|Cph-1|Cph1|R74677|fat
chr8	71658255	71658801	MACS_peak_176776	1655.91	546	NM_001029873	Unc13a	1655.91	12.68	11.71	382018	2410078G03Rik|Munc13-1
chr6	55680963	55681263	MACS_peak_152201	1649.97	300	NM_009717	Neurod6	1649.97	16.9	11.7	11922	Atoh2|Math-2|Math2|Nex|Nex1m|bHLHa2
chr12	83660594	83661460	MACS_peak_41099	1643.01	866	uc007odl.1	Rbm25	1643.01	9.79	11.76	67039	2600011C06Rik|2610015J01Rik|A130095G20Rik|AI159652|AL023075|AU043498|RNPC7
chrX	71559666	71560586	MACS_peak_195329	1642.62	920	NM_008253	Hmgb3	1642.62	8	11.75	15354	Hmg2a|Hmg4
chr7	143459794	143460716	MACS_peak_171186	1639.65	922	NM_001161624	Cdkn1c	1639.65	26.87	11.73	12577	AL024410|CDKI|Kip2|p57(kip2)|p57Kip2
chr13	104228610	104229002	MACS_peak_51113	1639.63	392	NM_181061	Cenpk	1639.63	29.12	11.72	60411	B130045K24Rik|BB232189|C530004N04Rik|Cenp-K|Solt|Solzt
chr3	107696157	107696560	MACS_peak_118065	1633.68	403	ENSMUST00000029490	Ahcyl1	1633.68	13.64	11.76	229709	1110034F20Rik|AA409031|AA414901|Ahcy-rs3|DCAL|Irbit
chr16	91828193	91828532	MACS_peak_76143	1625.1	339	NM_001110276	Itsn1	1625.1	9.49	11.69	16443	AA517634|AA545208|AI316805|AI839402|AI848451|Ehsh1|Ese1|Itsn|Sh3p17
chr12	71309883	71310307	MACS_peak_39617	1618.55	424	NM_021532	Dact1	1618.55	11.04	11.66	59036	4921528D17Rik|AI115603|DAPPER|DAPPER1|FRODO|Frd1|Frodo1|MDpr1|MTNG3|THYEX3
chr4	148616720	148617724	MACS_peak_133135	1614.2	1004	NM_145556	Tardbp	1614.2	12.24	11.62	230908	1190002A23Rik|C85084|TDP-43|Tdp43
chr17	37045965	37046289	MACS_peak_80331	1607.95	324	NM_019439	Gabbr1	1607.95	14.61	11.64	54393	GABAB1|GABAbR1|bM573K1.1
chr17	27623086	27623465	MACS_peak_79174	1605.05	379	ENSMUST00000025050	Nudt3	1605.05	12.95	11.62	56409	1110011B09Rik|AA960325|Dipp|Dipp1
chr2	27426275	27427033	MACS_peak_97983	1602.79	758	ENSMUST00000056176	Vav2	1602.79	14.96	11.59	22325	2810040F13Rik|AI847175|Vav-2
chr14	118912441	118913750	MACS_peak_60157	1596.75	1309	uc007uzc.1	Dzip1	1596.75	19.74	11.62	66573	2510025K24Rik|2810422M04Rik
chr10	115384958	115385807	MACS_peak_18911	1596.06	849	NM_001033261	Zfc3h1	1596.06	23.29	13.85	216345	BC033596|Ccdc131|Psrc2
chr8	71483447	71484364	MACS_peak_152372	1590.17	917	uc009mdm.2	Ano8	1590.17	37.04	13.96	382014	BC053460|Tmem16h
chr11	83302951	83303426	MACS_peak_23378	1588.55	475	ENSMUST00000142680	Ap2b1	1588.55	18.84	11.71	71770	1300012O03Rik|AI788979
chr11	98682553	98682937	MACS_peak_27775	1577.05	384	NM_009439	Psmd3	1577.05	8.59	13.99	22123	AI255837|AntP91a|D11Bwg1349e|Psd3|Tstap91a
chr5	32458969	32459407	MACS_peak_136926	1576.89	438	NM_172707	Ppp1cb	1576.89	16.11	11.7	19046	1200010B19
chr8	123859094	123859530	MACS_peak_156502	1575.15	436	uc009nwp.1	Ccsap	1575.15	20.4	14.06	73420	1700054N08Rik|AI853424
chr12	113071537	113074257	MACS_peak_43916	1572.43	2720	NM_001081170	Pacs2	1572.43	22.22	11.66	217893	6720425G15Rik|AW208651|AW489976|E230011J22|Pacs1l|mKIAA0602
chr9	43803471	43807442	MACS_peak_185881	1568.43	3971	NM_021424	Pvrl1	1568.43	12.18	11.62	NA	NA
chr11	96827197	96828223	MACS_peak_24304	1565.07	1026	NM_008686	Nfe2l1	1565.07	6.96	12.02	18023	AA408798|AW212678|LCR-F1|Lcrf1|NRF1|TCF-11|TCF11
chr2	59354202	59355208	MACS_peak_100775	1562.38	1006	ENSMUST00000037903	Pkp4	1562.38	10.49	11.69	227937	5031422I09Rik|9430019K17Rik|Armrp|p0071
chr2	153345844	153346390	MACS_peak_108140	1558.69	546	ENSMUST00000109790	Asxl1	1558.69	16.31	11.73	228790	mKIAA0978
chr7	90442776	90444513	MACS_peak_142800	1551.15	1737	ENSMUST00000061767	Crebzf	1551.15	6.94	14.43	233490	1110034C16Rik|6330417B10Rik|LAZip|LAZipII|SMILE|Zf
chr3	136670065	136670901	MACS_peak_102578	1545.85	836	NM_008913	Ppp3ca	1545.85	8.7	14.39	19055	2900074D19Rik|CN|Caln|Calna|CnA
chr15	95790407	95791459	MACS_peak_58108	1534.21	1052	ENSMUST00000180649	A130051J06Rik	1534.21	41.5	14.46	791370	ENSMUSG00000053098
chr4	116075268	116075607	MACS_peak_129035	1534.07	339	ENSMUST00000030471	Lrrc41	1534.07	24.29	11.89	230654	AA409966|AW555107|D630045E04Rik|D730026A16Rik|MUF1
chr4	41135742	41136246	MACS_peak_123323	1527.33	504	ENSMUST00000040008	Ube2r2	1527.33	8.85	11.9	67615	1200003M11Rik|Cdc34b|Ubc3b
chr19	4305901	4306222	MACS_peak_91286	1518.94	321	NM_130863	Adrbk1	1518.94	10.68	11.85	110355	Adrbk-1|Bark-1|GRK2|beta ARK|betaARK1
chr17	6224673	6225873	MACS_peak_77237	1506.12	1200	uc008agg.2	Tulp4	1506.12	16.78	11.93	68842	1110057P05Rik|2210038L17Rik|Tusp
chr6	30151992	30152865	MACS_peak_149730	1501.99	873	NM_010938	Nrf1	1501.99	21.56	11.94	18181	C87038|D6Ertd415e
chr11	22972006	22974735	MACS_peak_24656	1500.12	2729	NM_011663	Zrsr1	1500.12	14.72	11.91	22183	D11Ncvs75|Irlgs2|SP2|U2af1-rs1|U2afbp-rs
chr7	79464603	79465371	MACS_peak_126094	1499.26	768	NM_017462	Polg	1499.26	14.63	12.27	18975	AA409516|PolgA
chr13	55473427	55474293	MACS_peak_48047	1496.1	866	NM_019813	Dbn1	1496.1	22.49	11.89	56320	-
chr1	135470479	135471170	MACS_peak_6718	1495.51	691	NM_173437	Nav1	1495.51	5.76	12.23	215690	9530089B19|9930003A20Rik|C230080M11Rik|Pomfil3|Unc53h1|mKIAA1151|steerin-1
chr17	10318731	10319361	MACS_peak_66681	1495.48	630	NM_021881	Qk	1495.48	13.57	14.56	19317	1110003F05Rik|1500005P18|QkI|l(17)-1Wis|l17Wis1
chr17	46661786	46662231	MACS_peak_80734	1486.31	445	uc008ctt.1	Cul7	1486.31	12.97	11.86	66515	2510004L20Rik|AA409809|C230011P08Rik|p185|p193
chr12	102757540	102758672	MACS_peak_42856	1477.72	1132	ENSMUST00000174651	Gm20604	1477.72	17.95	11.91	100859931	AK010878-Moap1
chr2	158757137	158757484	MACS_peak_109035	1474.84	347	uc008nqo.2	Ppp1r16b	1474.84	16.56	11.93	228852	ANKRD4|C130078N17Rik|TIMAP|Wdt4
chr8	110618637	110618993	MACS_peak_154929	1474.14	356	NM_146216	Vac14	1474.14	11.5	14.8	234729	AA959718|BC032215|D8Wsu151e|Tax1bp2|Trx|ingls
chr14	67072089	67072471	MACS_peak_49486	1471.2	382	NM_028032	Ppp2r2a	1471.2	9.83	14.78	71978	2410004D02Rik|mKIAA1541
chr7	99345456	99346422	MACS_peak_143797	1468.11	966	NM_009825	Serpinh1	1468.11	16.25	14.76	12406	BERF-1|Cbp1|Cbp2|Hsp47|J6|Serpinh2|gp46
chr2	151542817	151543557	MACS_peak_82392	1465.78	740	uc008ndx.1	Fkbp1a	1465.78	10.39	11.99	14225	FKBP12|Fkbp|Fkbp1
chr5	115134666	115134975	MACS_peak_123152	1465.05	309	NM_175352	Unc119b	1465.05	22.79	14.8	106840	AA407659|AI414892
chr3	67463585	67463926	MACS_peak_87545	1461.93	341	ENSMUST00000058981	Lxn	1461.93	12.41	12.08	17035	-
chr9	119322004	119322427	MACS_peak_192862	1461.8	423	NM_133985	Oxsr1	1461.8	20.01	11.89	108737	2210022N24Rik|2810422B09Rik|AI462649|AW209236|Osr1|mKIAA1101
chr3	16183182	16183520	MACS_peak_85542	1460.17	338	NM_172677	Ythdf3	1460.17	11.39	12.07	229096	9130022A11Rik
chr17	32201001	32201592	MACS_peak_68623	1458.24	591	NM_020508	Brd4	1458.24	9.87	14.93	57261	Brd5|HUNK1|MCAP|WI-11513
chr2	156475533	156476006	MACS_peak_108628	1448.08	473	NM_001006664	Epb4.1l1	1448.08	18.28	11.87	NA	NA
chr14	26638073	26638486	MACS_peak_54162	1444.36	413	ENSMUST00000022429	Arf4	1444.36	13.47	11.95	11843	AA407803
chr11	69090649	69092384	MACS_peak_24666	1443.72	1735	ENSMUST00000021273	Vamp2	1443.72	8.64	14.92	22318	Syb-2|Syb2|sybII
chr4	129620119	129621150	MACS_peak_130864	1439.61	1031	uc008uxv.1	Ccdc28b	1439.61	14.8	11.9	66264	1110002E08Rik|1810010N17Rik
chrX	151919575	151920185	MACS_peak_198104	1439.07	610	NM_021523	Huwe1	1439.07	10.28	11.89	59026	5430439H10Rik|AU041296|Arf-bp1|C430014N20Rik|C80292|Gm1718|Ib772|LASU1|Mule|Ureb1
chr2	180589244	180589621	MACS_peak_111352	1434.24	377	ENSMUST00000029087	Ogfr	1434.24	18.7	11.85	72075	2010013E17Rik
chr14	103099161	103099554	MACS_peak_50846	1433.76	393	ENSMUST00000022720	Fbxl3	1433.76	9.9	14.93	50789	AU041772|AW212966|FBK|Fbl3a|Fbxl3a|Ovtm|Play68
chr13	100060293	100061506	MACS_peak_43704	1432.4	1213	NM_001081061	Bdp1	1432.4	13.85	14.91	544971	AI662220|AW049390|AW456745|B130055N23Rik|G630013P12Rik|TAF3B1|TFC5|TFIIIB150|TFIIIB90|Tfnr|mKIAA1241
chr7	4539764	4540298	MACS_peak_159479	1431.63	534	NM_016908	Syt5	1431.63	8.44	11.82	53420	SytV
chr12	100944846	100945908	MACS_peak_42661	1430.8	1062	NM_026681	Ccdc88c	1430.8	10.84	11.81	68339	0610010D24Rik|AV000935|AW324073|Daple|mKIAA1509
chr7	90468193	90469117	MACS_peak_166008	1428.68	924	ENSMUST00000032843	Tmem126b	1428.68	22.83	11.78	68472	1110001A23Rik
chr2	4603376	4604251	MACS_peak_73487	1428.12	875	NM_172475	Frmd4a	1428.12	6.56	12.14	209630	2700017I06Rik|5330420J21|AI594879|C230040M21Rik|Frmd4|Gm13190|OTTMUSG00000010806|mKIAA1294
chr10	61738667	61739462	MACS_peak_17467	1426.83	795	NM_207000	H2afy2	1426.83	13.96	11.78	404634	macroH2A2
chr8	4524360	4525390	MACS_peak_171622	1426.41	1030	NM_026058	Cers4	1426.41	6.13	11.81	67260	2900019C14Rik|Lass4|Trh1
chr1	74855028	74857732	MACS_peak_4312	1424.86	2704	NM_009872	Cdk5r2	1424.86	8.5	15.1	12570	B230310J22Rik|p39
chr7	25270834	25273633	MACS_peak_122683	1423.71	2799	NM_001302811	Cic	1423.71	9.9	12.24	71722	1200010B10Rik|mKIAA0306
chr10	80335109	80336422	MACS_peak_16403	1417.51	1313	NM_139292	Reep6	1417.51	20.67	15.02	70335	0610011M24Rik|Dp1l1
chr10	43174698	43175747	MACS_peak_12179	1413.35	1049	uc011xdj.2	9030612E09Rik	1413.35	7.61	12.31	74530	-
chr8	48555152	48555693	MACS_peak_151068	1412.68	541	ENSMUST00000110346	Tenm3	1412.68	32.72	14.92	23965	2610100B16Rik|Odz1|Odz3|Ten-m3|mKIAA1455
chr5	142867540	142869353	MACS_peak_147226	1410.66	1813	ENSMUST00000110766	Fbxl18	1410.66	25.07	11.84	231863	AI427077|B130019G13Rik|C330021B20Rik
chr15	76085619	76087144	MACS_peak_55867	1409.1	1525	NM_144847	Nrbp2	1409.1	28.15	14.9	223649	BC011468
chr12	112737838	112739509	MACS_peak_33733	1404.98	1671	NM_001024602	Cep170b	1404.98	15.14	12.26	217882	AI466840|AW555464|Kiaa0284|mKIAA0284
chr7	73409231	73409749	MACS_peak_164572	1401.03	518	NM_177740	Rgma	1401.03	9.75	11.83	244058	BC059072|C230063O06
chr18	36281096	36281549	MACS_peak_74653	1399.48	453	ENSMUST00000051301	Pura	1399.48	30.81	14.85	19290	CAGER-1|Pur-alpha|ssCRE-BP
chr11	86757247	86757565	MACS_peak_26763	1395.32	318	ENSMUST00000103186	Cltc	1395.32	8.79	14.81	67300	3110065L21Rik|CHC|R74732
chr5	114432748	114433358	MACS_peak_143162	1390.33	610	NM_029956	Mmab	1390.33	16.83	11.75	77697	9130222L19Rik|ATR
chr11	60417144	60417844	MACS_peak_27919	1388.91	700	NM_025757	Gid4	1388.91	19.62	11.79	66771	4933439F18Rik
chr6	12554894	12555726	MACS_peak_148729	1387.59	832	NM_001164805	Thsd7a	1387.59	11.18	11.78	330267	Gm837
chrX	108743183	108743728	MACS_peak_169480	1382.8	545	NM_001081477	Brwd3	1382.8	25.49	14.84	382236	Brodl|D030064D06Rik|Gm596
chr13	101757007	101758039	MACS_peak_50938	1380.25	1032	uc007rrv.1	Pik3r1	1380.25	15.15	11.83	18708	PI3K|p50alpha|p55alpha|p85alpha
chr19	5456419	5457563	MACS_peak_91459	1379.43	1144	NM_198616	Ccdc85b	1379.43	10.72	11.86	240514	AI842788|BB115872
chr13	97135094	97135444	MACS_peak_50621	1374.11	350	uc007rnt.2	Nsa2	1374.11	4.9	11.83	59050	5730427N09Rik|LNR42|Nsa2p|Tinp1|Yr29
chr6	18433709	18435446	MACS_peak_149058	1372.93	1737	uc009ban.1	Cttnbp2	1372.93	10.22	11.82	30785	3010022N24Rik|4732477G22Rik|6430526E05|9130022E09Rik|AU040881|Cortbp2|ORF4|mKIAA1758
chr17	46446161	46447717	MACS_peak_80672	1372.15	1556	NM_001162864	Ttbk1	1372.15	16.49	11.86	106763	AU017937|AW048023|C330008L01Rik
chr5	93267422	93267797	MACS_peak_141162	1370.91	375	ENSMUST00000031331	Ccng2	1370.91	24.46	11.83	12452	-
chr8	86745698	86746162	MACS_peak_153586	1364.04	464	ENSMUST00000098532	Gm10638	1364.04	24.87	14.87	666945	ENSMUSG00000074178
chr15	79108971	79109429	MACS_peak_56285	1363.08	458	ENSMUST00000040320	Micall1	1363.08	43.3	14.86	27008	AI448246|D15Mit260|D15N2e|EST573322|EST820961|MIRab13|mKIAA1668
chr15	81744894	81745346	MACS_peak_50471	1356.49	452	NM_001081016	Zc3h7b	1356.49	10.61	12.92	20286	Gm627|Scrg3|Zc2h7b|mKIAA1031
chr10	4353141	4357939	MACS_peak_10182	1349.37	4798	NM_031185	Akap12	1349.37	6.51	13.15	83397	AI317366|SSeCKS|Srcs5|Tsga12
chr6	39420098	39420462	MACS_peak_115346	1342.39	364	ENSMUST00000031985	Mkrn1	1342.39	10.98	13.08	54484	RFP
chr3	10088172	10089618	MACS_peak_111838	1341.95	1446	ENSMUST00000061419	Gm9833	1341.95	8.18	11.83	100041480	ENSMUSG00000049230
chr8	107580419	107581319	MACS_peak_154782	1339.23	900	NM_010817	Psmd7	1339.23	9.79	14.82	17463	AW107203|Mov-34|Mov34
chr11	77930799	77931114	MACS_peak_25665	1337.49	315	ENSMUST00000093995	Sez6	1337.49	12.44	14.8	20370	BSRP-C|D11Bhm177e|sez-6
chr4	141793611	141793986	MACS_peak_100947	1336.69	375	NM_015733	Casp9	1336.69	47.4	13.18	12371	AI115399|APAF-3|AW493809|CASP-9|Caspase-9|ICE-LAP6|Mch6
chr3	101604402	101604707	MACS_peak_100872	1327.71	305	NM_144900	Atp1a1	1327.71	10.49	14.83	11928	Atpa-1|BC010319
chr6	93678178	93679002	MACS_peak_154960	1327.55	824	NM_010367	Magi1	1327.55	13.17	11.88	14924	AIP3|BAP1|Baiap1|Gukmi1|MAGI1c|Magi-1|TNRC19|WWP3|mKIAA4129
chr6	38433924	38434598	MACS_peak_129660	1323.23	674	NM_177185	Ubn2	1323.23	20.2	14.85	320538	2900060J04Rik|6030408G03Rik|BC060116|D130059P03Rik|mKIAA2030
chr3	90079520	90079863	MACS_peak_116657	1318.79	343	NM_001253738	Tpm3	1318.79	4.71	11.87	59069	TM30nm|TMnm|Tm5NM|Tpm-5|Tpm5|Trop-5|gamma-TM|hTM30nm|hTMnm
chr4	141874559	141874920	MACS_peak_132552	1318.45	361	NM_025994	Efhd2	1318.45	10.67	11.86	27984	2600015J22Rik|AA408606|D4Wsu27e
chr5	123157320	123157670	MACS_peak_144460	1317.9	350	NM_001040398	Setd1b	1317.9	8.51	11.9	208043	AA516740|BC035291|KMT2G|mKIAA1076
chr5	8622487	8622952	MACS_peak_102758	1316.3	465	NM_198620	Rundc3b	1316.3	14.53	13.49	242819	Gm440
chr11	98863597	98863902	MACS_peak_32145	1314.67	305	NM_197940	Wipf2	1314.67	15.89	11.91	68524	1110014J05Rik|5730509C05Rik|AA407487|Gm1176|Wich|Wire
chr19	5118121	5118560	MACS_peak_91417	1313.74	439	ENSMUST00000116563	Klc2	1313.74	17.06	11.9	16594	8030455F02Rik|AW212649|KLC 2|KLC-2
chr18	36748550	36749284	MACS_peak_86770	1312.6	734	uc012bbs.1	Ik	1312.6	5.58	11.89	24010	MuRED
chr12	3865984	3866705	MACS_peak_30784	1312.08	721	uc007mxa.2	Dnmt3a	1312.08	9.91	14.97	13435	MmuIIIA
chr6	135023278	135023641	MACS_peak_158167	1308.16	363	NM_026360	Ddx47	1308.16	12.17	11.89	67755	4930588A18Rik|C77285
chr2	32633640	32635058	MACS_peak_98736	1308.07	1418	NM_021515	Ak1	1308.07	22.65	11.89	11636	Ak-1|B430205N08Rik
chr5	137785051	137786701	MACS_peak_126166	1301.07	1650	NM_144913	Mepce	1301.07	11.29	15.05	231803	Bcdin3|D5Wsu46e
chr8	123527911	123528322	MACS_peak_181515	1297.7	411	uc009nwj.1	Gas8	1297.7	14.31	11.89	104346	Gas11
chr13	49261685	49263233	MACS_peak_47499	1295.55	1548	ENSMUST00000110087	Fgd3	1295.55	27.27	11.87	30938	5830461L01Rik|ZFYVE5
chr5	115272256	115272898	MACS_peak_109429	1295.13	642	ENSMUST00000112097	Rnf10	1295.13	5.41	13.7	50849	AA675014|RIE2|mKIAA0262
chr17	34895226	34896844	MACS_peak_68944	1292.65	1618	NM_198886	Zbtb12	1292.65	23.15	15.33	193736	BC020447|Bat-9|Bat9|G10|NG35
chr9	98032860	98033181	MACS_peak_164241	1289.28	321	ENSMUST00000035027	Clstn2	1289.28	14.4	15.31	64085	2900042C18Rik|AI448973|CSTN2|Cs2|Cst-2|mKIAA4134
chr9	21546893	21547230	MACS_peak_183631	1282.02	337	NM_021531	Carm1	1282.02	19.16	11.96	59035	Prmt4
chr7	127708435	127708890	MACS_peak_169948	1274.54	455	ENSMUST00000061468	Bcl7c	1274.54	8.56	11.93	12055	C230096E12Rik
chr10	120227185	120227549	MACS_peak_22623	1262.02	364	ENSMUST00000130198	Llph	1262.02	8.29	11.93	66225	1190005P17Rik
chr13	94202821	94204163	MACS_peak_50357	1257.09	1342	NM_029153	Scamp1	1257.09	15.57	11.89	107767	4930505M11Rik|AI415563|AW122395
chr2	29619719	29620063	MACS_peak_84454	1252.71	344	NM_054050	Rapgef1	1252.71	14.3	15.78	107746	4932418O06Rik|C3G|Grf2
chr8	9977706	9978019	MACS_peak_147979	1252.45	313	ENSMUST00000139793	Abhd13	1252.45	16.01	15.76	68904	1110065L07Rik|AI463703|AI788994
chr3	93444600	93448013	MACS_peak_116742	1251.97	3413	NM_001163098	Tchh	1251.97	11.89	11.85	99681	AHF|AI597080|Thh
chr7	101898372	101899619	MACS_peak_167647	1250.2	1247	ENSMUST00000106969	Tomt	1250.2	16.16	11.83	791260	Comt2|F930017I19Rik
chr1	36558015	36558381	MACS_peak_2267	1249.31	366	NM_001126047	Sema4c	1249.31	37.94	11.86	20353	AI426163|M-Sema F|Semacl1|Semaf|Semai|sema I
chr11	61448575	61449877	MACS_peak_24063	1245.28	1302	NM_009548	Rnf112	1245.28	25.19	15.89	22671	ZNF179|Zfp179|bfp
chr10	119454033	119454422	MACS_peak_19114	1244.27	389	NM_133442	Grip1	1244.27	15.35	15.85	74053	4931400F03Rik|GRIP|eb
chr7	28558861	28559805	MACS_peak_160957	1243.98	944	NM_027470	Pak4	1243.98	24.91	11.91	70584	5730488L07Rik|AW555722|mKIAA1142
chr5	137600270	137600708	MACS_peak_146564	1237.96	438	NM_001254762	Mospd3	1237.96	31.77	11.84	68929	1190005J19Rik|5133401H10Rik|Gtig2|R124
chr16	57121713	57122194	MACS_peak_74023	1230.48	481	NM_138599	Tomm70a	1230.48	8.75	11.96	28185	2610044B22Rik|D16Ium22|D16Ium22e|D16Wsu109e|Tom70|Tomm70|mKIAA0719
chr2	25316521	25316889	MACS_peak_97733	1226.99	368	uc008irm.2	Grin1	1226.99	14.25	12.01	14810	GluN1|GluRdelta1|GluRzeta1|M100174|NMD-R1|NMDAR1|NR1|Nmdar|Rgsc174
chr10	42502030	42502492	MACS_peak_16192	1222.8	462	ENSMUST00000019939	Snx3	1222.8	8.75	12.06	54198	SDP3
chr13	96088219	96088900	MACS_peak_50552	1221.39	681	NM_029210	Sv2c	1221.39	14	12.04	75209	4930527L09Rik|AI841971
chr2	150786734	150787110	MACS_peak_82334	1214.34	376	ENSMUST00000045441	Pygb	1214.34	6.53	13.88	110078	-
chr17	4994938	4996492	MACS_peak_66054	1212.99	1554	ENSMUST00000092723	Arid1b	1212.99	11.01	15.98	239985	8030481M12|9330189K18Rik|AI836955|Ardi1b|B230217J03Rik|mKIAA1235
chr1	152845212	152845595	MACS_peak_7131	1210.77	383	NM_001005507	Smg7	1210.77	15.6	13.85	226517	9430023P16Rik|mKIAA0250
chr16	33726300	33727596	MACS_peak_71917	1206.94	1296	NM_175256	Heg1	1206.94	10.39	12.08	77446	4632417D23Rik|5530401I02Rik|9530025L16Rik|BC038614|Gm629|OTTMUSG00000027315
chr18	75432317	75435409	MACS_peak_90105	1206.72	3092	NM_201354	Ctif	1206.72	18.36	12.07	269037	Gm672
chr6	125096568	125097265	MACS_peak_135473	1203.08	697	ENSMUST00000155261	Chd4	1203.08	13.61	16.09	107932	9530019N15Rik|AA617397|BC005710|D6Ertd380e|Mi-2beta|mKIAA4075
chr1	152089931	152090320	MACS_peak_8076	1194.55	389	NM_197990	1700025G04Rik	1194.55	22.14	16.18	69399	2610510E02Rik|2900042O04Rik|ENSMUSG00000073540
chr4	132006957	132007438	MACS_peak_131130	1193.71	481	NM_183428	Epb4.1	1193.71	5.87	12.17	NA	NA
chr6	36809893	36810484	MACS_peak_150481	1193.25	591	NM_008973	Ptn	1193.25	8.67	12.16	19242	HARP|HB-GAM|HBBN|HBGF-8|HBNF|OSF|Osf-1|Osf1
chr2	92388974	92389280	MACS_peak_103148	1191.6	306	NM_011162	Mapk8ip1	1191.6	12.62	12.14	19099	IB1|JIP-1|Jip1|Prkm8ip|Skip|mjip-2a
chr13	14245523	14245875	MACS_peak_45252	1189.63	352	uc007pnf.1	Hecw1	1189.63	7.5	12.17	94253	9330116H24Rik|AV273951|E130207I19Rik|Nedl1
chr18	43392989	43393377	MACS_peak_66742	1187.85	388	NM_009468	Dpysl3	1187.85	8.62	13.94	22240	CRMP-4|DRP-3|TUC4|ULIP-1|Ulip|Ulip1
chr7	97311496	97312625	MACS_peak_166941	1184.94	1129	NM_001177412	Usp35	1184.94	27.97	12.12	244144	Gm1088|Gm493
chr15	76521590	76522129	MACS_peak_49738	1181.03	539	NM_130893	Scrt1	1181.03	14.17	13.88	170729	-
chr8	110738289	110741400	MACS_peak_179793	1180.96	3111	NM_198625	Mtss1l	1180.96	4.1	12.18	244654	ABBA
chr1	60409618	60409919	MACS_peak_3311	1180.4	301	NM_198127	Abi2	1180.4	12.16	16.3	329165	8430425M24Rik|AI839867|C130078H13
chrX	135208685	135209570	MACS_peak_197316	1178.65	885	NM_025355	Tceal6	1178.65	11.9	12.24	66104	1500026B10Rik
chr7	127022136	127023168	MACS_peak_169866	1175.15	1032	NM_010772	Maz	1175.15	11.43	12.23	17188	PUR1|Pur-1|SAF-1|SAF-2
chr7	43472906	43474551	MACS_peak_161910	1172.47	1645	NM_001164518	Iglon5	1172.47	16.01	12.25	210094	A230106M20Rik|Gm1431
chr3	108412184	108415552	MACS_peak_89949	1166.05	3368	ENSMUST00000090558	Celsr2	1166.05	4.74	13.84	53883	Adgrc2|EGFL2|Flamingo1|flamingo|mKIAA0279|mfmi1
chr10	67255447	67255771	MACS_peak_17815	1162.58	324	NM_207221	Jmjd1c	1162.58	16.02	12.19	108829	5430433L24Rik|D630035I23Rik|Jmjdic|TRIP8
chr16	20516981	20517355	MACS_peak_61018	1162.38	374	ENSMUST00000003318	Dvl3	1162.38	16.29	16.44	13544	-
chr7	126491727	126493001	MACS_peak_146029	1162.08	1274	uc009jrt.1	Atxn2l	1162.08	4.58	16.43	233871	A2D|A2LG|A2RP|A2lp|Atxnl2
chr9	66845091	66845753	MACS_peak_162486	1160.94	662	NM_173413	Rab8b	1160.94	24.42	16.41	235442	5930437D16|D330025I23Rik
chr8	107367927	107369551	MACS_peak_179544	1158.16	1624	NM_018823	Nfat5	1158.16	11.62	12.21	54446	AI225870|B130038B15Rik|CAG-8|CAG80|NFATL1|OREBP|TonEBP|mKIAA0827|nfatz
chr4	32760619	32760942	MACS_peak_122727	1155.32	323	NM_001081392	Mdn1	1155.32	14.11	12.18	100019	4833432B22Rik|A130070M06|AA958993|D4Abb1e|Gm135
chr3	69126731	69127113	MACS_peak_98831	1154.58	382	ENSMUST00000029353	Kpna4	1154.58	21.86	16.4	16649	1110058D08Rik|IPOA3
chr7	64695023	64696017	MACS_peak_141092	1148.35	994	NM_007461	Apba2	1148.35	7.23	16.52	11784	X11-like|X11L|XllL|mXllL
chr5	124490122	124491124	MACS_peak_144717	1147.54	1002	ENSMUST00000031349	Snrnp35	1147.54	12.87	12.22	76167	6330548G22Rik
chr8	109562443	109562783	MACS_peak_154836	1143.65	340	NM_178380	Dhx38	1143.65	12.02	16.39	64340	5730550P09Rik|AI325984|AW540902|Ddx38|Prp16|mKIAA0224
chr8	70698240	70700581	MACS_peak_152257	1140.28	2341	NM_010592	Jund	1140.28	6.3	16.5	16478	Jund1
chr8	4245694	4247180	MACS_peak_147708	1140.27	1486	NM_011944	Map2k7	1140.27	17.93	16.49	26400	5930412N11Rik|JNKK 2|Jnkk2|MAPKK 7|MEK 7|Mapkk7|Mek7|Mkk7|Prkmk7|sek2
chr2	52857859	52858259	MACS_peak_86325	1135.92	400	ENSMUST00000090952	Fmnl2	1135.92	15.42	16.45	71409	5430425K04Rik|Man
chr14	79767019	79771312	MACS_peak_44926	1130.92	4293	uc029smd.1	Pcdh8	1130.92	6.83	14.44	18530	1700080P15Rik|Papc
chr12	110868588	110869492	MACS_peak_43573	1125.72	904	NM_028365	Zfp839	1125.72	18.95	12.39	72805	2810455K09Rik
chr3	45378397	45382425	MACS_peak_113883	1123.08	4028	NM_011043	Pcdh10	1123.08	11.33	12.37	18526	6430521D13Rik|6430703F07Rik|OL-pc|mKIAA1400
chr9	110547208	110548686	MACS_peak_192030	1122.44	1478	NM_001081340	Setd2	1122.44	13.24	12.35	235626	4921524K10Rik|BC031601|KMT3A
chr11	5098925	5099566	MACS_peak_23803	1117.52	641	ENSMUST00000101610	Rhbdd3	1117.52	20.12	12.36	279766	Ptag
chr5	149635969	149636338	MACS_peak_147960	1117.41	369	ENSMUST00000074846	Hsph1	1117.41	13.1	12.35	15505	105kDa|AI790491|Hsp105|Hsp110|hsp-E7I|hsp110/105
chr11	77045586	77046754	MACS_peak_22529	1117.38	1168	NM_001012309	Ccdc55	1117.38	9.3	14.83	NA	NA
chr4	138125809	138126634	MACS_peak_100463	1117.07	825	NM_172703	Eif4g3	1117.07	6.16	14.8	230861	1500002J22Rik|4833436O05|4930523M17Rik|G1-419-52|eIF4GII|repro8
chr3	90498661	90500107	MACS_peak_116715	1107.75	1446	NM_023215	Chtop	1107.75	15.61	12.47	66511	2500003M10Rik|Fop|Srag
chr2	130564937	130565398	MACS_peak_106025	1106.97	461	ENSMUST00000145614	Mrps26	1106.97	6.47	12.5	99045	AI648866|GI008|MRP-S13|MRP-S26|Rpms13
chr11	116827728	116828037	MACS_peak_29738	1104.45	309	NM_026280	Mxra7	1104.45	18.99	16.93	67622	1810057P16Rik|E130302J09Rik
chr9	83109993	83111106	MACS_peak_189648	1104.01	1113	uc009qwc.3	Hmgn3	1104.01	9.88	12.57	94353	1110002A15Rik|6330514M13Rik|BB071015|TRIP7
chr2	167188056	167188818	MACS_peak_110006	1103.61	762	NM_008420	Kcnb1	1103.61	16.89	12.56	16500	Kcr1-1|Kv2.1|Shab
chr8	112011401	112012339	MACS_peak_180014	1100.84	938	uc009nnh.1	Terf2ip	1100.84	8.33	12.64	57321	Rap1
chr8	126394931	126395963	MACS_peak_181947	1096.89	1032	NM_175434	Slc35f3	1096.89	55.01	12.62	210027	B230375D17Rik
chr7	127803899	127807389	MACS_peak_169966	1095.52	3490	ENSMUST00000106267	Stx1b	1095.52	11.79	12.6	56216	Stx1b2|Stx1bl|Syn1b
chrX	73673132	73674050	MACS_peak_168275	1093.29	918	NM_133987	Slc6a8	1093.29	12.55	16.95	102857	AA589632|CRT|CRTR|CT1|CTR5|Creat
chr19	16132830	16133461	MACS_peak_79369	1092.63	631	NM_008139	Gnaq	1092.63	8.34	16.94	14682	1110005L02Rik|6230401I02Rik|AA408290|AW060788|Dsk1|Dsk10|Galphaq|Gq|GqI
chr2	112652458	112652765	MACS_peak_104347	1089.44	307	NM_177652	Ryr3	1089.44	19.19	12.54	20192	AI851294|C230090H21|RYR-3
chr8	10153922	10154246	MACS_peak_171850	1087.72	324	NM_001081397	Myo16	1087.72	15.74	12.53	244281	BM140241|C230040D10Rik|Gm1105|NYAP3|mKIAA0865
chr1	194619828	194620397	MACS_peak_10012	1087.48	569	NM_008882	Plxna2	1087.48	9.93	15.02	18845	2810428A13Rik|AA589422|AW457381|OCT|PlexA2|Plxn2|mKIAA0463
chr12	80757483	80758800	MACS_peak_35047	1086.67	1317	NM_001008423	Ccdc177	1086.67	9.41	17.04	380768	Gm1568
chr15	102460369	102460719	MACS_peak_52471	1086.18	350	NM_025385	Prr13	1086.18	12.56	14.97	66151	1110020C13Rik|2010324E22Rik
chr3	92080364	92082000	MACS_peak_100059	1084.5	1636	NM_008508	Lor	1084.5	11.18	17.08	16939	AI036317|S77319
chr15	68928419	68928833	MACS_peak_55306	1082.47	414	NM_010158	Khdrbs3	1082.47	10.38	17.05	13992	Etle|SLM-2|Salp|Slm2|T-STAR
chr18	43477045	43477830	MACS_peak_87588	1077.53	785	ENSMUST00000057110	Eif3j2	1077.53	18.87	12.5	100042807	ENSMUSG00000043424|Eif3j-2|Gm9781|eIF3 p35|eIF3j-B
chr2	25583017	25583988	MACS_peak_97769	1076.62	971	NM_001024616	Rabl6	1076.62	11.72	12.5	227624	B230208H17Rik|Rbel1|Rbel1a|Rbel1b|parf
chr7	45033744	45034394	MACS_peak_139489	1074.91	650	uc009gst.1	Prr12	1074.91	13.61	17.34	233210	6720469B10|BC058674
chr11	84869344	84869798	MACS_peak_23533	1071.17	454	uc007kqx.1	Ggnbp2	1071.17	11.78	14.81	217039	AI451896|C75939|D330017P12Rik|DIF-3|Zfp403
chr16	66659635	66661047	MACS_peak_74401	1069.12	1412	NM_178721	Cadm2	1069.12	18.02	12.49	239857	2900078E11Rik|9330131D06|A830029E02Rik|Igdf4d|Igsf4d|NECL3|SynCAM 2|SynCAM2
chr18	47247103	47249584	MACS_peak_75619	1068.9	2481	NM_018744	Sema6a	1068.9	6.9	17.39	20358	A730020P05Rik|AI851735|Sema6A-1|Semaq|VIa
chr14	24003747	24004205	MACS_peak_46149	1067.07	458	NM_010610	Kcnma1	1067.07	11.99	17.39	16531	5730414M22Rik|BKCa|MaxiK|Slo|Slo1|mSlo|mSlo1
chr8	13794898	13795234	MACS_peak_131975	1066.28	336	uc009kym.1	Upf3a	1066.28	12.69	14.7	67031	2600001C03Rik|4930546M19Rik|RENT3A|UPF3
chr3	84903500	84904079	MACS_peak_99380	1065.34	579	NM_001177773	Fbxw7	1065.34	10.96	17.4	50754	1110001A17Rik|AGO|Cdc4|Fbw7|Fbwd6|Fbx30|Fbxo30|Fbxw6|SEL-10
chr7	130728522	130729828	MACS_peak_146456	1064.43	1306	NM_021314	Tacc2	1064.43	8.42	17.38	57752	mKIAA4180
chr5	19907517	19908013	MACS_peak_115997	1061.55	496	NM_015823	Magi2	1061.55	17.32	17.47	50791	AIP-1|Acvri1|Acvrinp1|Acvrip1|Magi-2|S-SCAM|mKIAA0705
chr9	72532239	72532980	MACS_peak_162999	1058.43	741	NM_001033536	Rfx7	1058.43	10.1	17.39	319758	2510005N23Rik|9930116O05Rik|D130086K05Rik|Rfxdc2
chrX	147553677	147554081	MACS_peak_170234	1054.75	404	NM_001081173	Lrch2	1054.75	15.9	17.37	210297	AI316885|mKIAA1495
chr3	90043501	90043810	MACS_peak_116650	1054.58	309	uc008qaz.2	Ubap2l	1054.58	9.13	12.63	74383	3110083O19Rik|4932431F02Rik|A430103N23Rik|C77168|Nice-4|mKIAA0144
chr13	21810366	21810918	MACS_peak_35081	1052.17	552	NM_001177544	Hist1h2ao	1052.17	8.76	14.81	665433	-
chr5	121009237	121009538	MACS_peak_110066	1050.45	301	NM_011286	Rph3a	1050.45	13.4	14.78	19894	2900002P20Rik|AU022689|AW108370
chr3	117360023	117360659	MACS_peak_101728	1049.51	636	NM_177664	Lppr4	1049.51	10.76	17.35	NA	NA
chr14	30573336	30573872	MACS_peak_54851	1043.43	536	NM_009388	Tkt	1043.43	8.91	12.77	21881	p68
chr19	4711207	4711644	MACS_peak_78547	1042.59	437	ENSMUST00000008991	Sptbn2	1042.59	6.92	17.5	20743	Spnb3|mKIAA0302
chr10	128882997	128885486	MACS_peak_23441	1042.3	2489	ENSMUST00000026408	Gdf11	1042.3	15.33	12.76	14561	BMP-11|Bmp11
chr8	87471976	87472592	MACS_peak_178204	1040.9	616	NM_019626	Cbln1	1040.9	21.58	12.75	12404	AI323299
chr15	93241308	93242596	MACS_peak_67514	1039	1288	NM_001033275	Gxylt1	1039	21.51	12.71	223827	Glt8d3|Gm1228|Gm87
chr6	17491226	17492437	MACS_peak_148941	1034.3	1211	NM_008591	Met	1034.3	13.66	12.76	17295	AI838057|HGF|HGFR|Par4|c-Met
chr10	81019588	81022470	MACS_peak_19368	1034.12	2882	ENSMUST00000055125	Diras1	1034.12	12.9	12.75	208666	Di-Ras1|Gbts1|RIG
chr10	39369763	39370190	MACS_peak_15780	1028.79	427	ENSMUST00000063091	Fyn	1028.79	6.28	12.73	14360	AI448320|AW552119
chr15	84105430	84105754	MACS_peak_66592	1022.06	324	NM_013873	Sult4a1	1022.06	16.69	12.75	29859	2400007A17Rik|AI853543|BR-STL-1|ST4A1|Sultx3
chr1	60488312	60490321	MACS_peak_3329	1020.67	2009	NM_001045513	Raph1	1020.67	7.49	17.7	77300	9430025M21Rik|C730009O10Rik|Lpd
chr3	55112165	55112491	MACS_peak_114295	1019.6	326	NM_001144987	Spg20	1019.6	27.54	12.73	229285	AI840044|C79168|SPARTIN|TAHCCP1|mKIAA0610
chr3	89164794	89165106	MACS_peak_116495	1019.11	312	ENSMUST00000121212	Clk2	1019.11	17.9	12.72	12748	AU041688
chr10	40936109	40936738	MACS_peak_11941	1016.68	629	NM_031877	Wasf1	1016.68	4.89	15.15	83767	AI195380|AI838537|Scar|WAVE|WAVE-1
chr9	44483112	44483486	MACS_peak_160254	1012.68	374	uc009pdu.1	Bcl9l	1012.68	11.22	17.68	80288	B9L|BC003321|BCL9-2|DLNB11
chr15	81586213	81586722	MACS_peak_56661	1010.66	509	NM_177821	Ep300	1010.66	11.26	17.72	328572	A430090G16|A730011L11|KAT3B|p300|p300 HAT
chr7	24081896	24082238	MACS_peak_137870	1010.56	342	NM_172483	Zfp180	1010.56	22.2	17.71	210135	2310040I01Rik|AI852378|D130011P11|HHZ168
chr15	76511554	76511951	MACS_peak_55938	1006.88	397	ENSMUST00000023214	Dgat1	1006.88	21.27	17.66	13350	ARAT|C75990|D15Ertd23e|Dgat
chr8	124662847	124663369	MACS_peak_181673	1003.39	522	NM_175149	2310022B05Rik	1003.39	8.04	12.75	69551	-
chr13	105443692	105444131	MACS_peak_51260	1003	439	NM_008308	Htr1a	1003	22.02	12.77	15550	Gpcr18
chr5	34574041	34574380	MACS_peak_137231	1000.2	339	ENSMUST00000114335	Add1	1000.2	14.57	12.77	11518	AI256389
chr15	89457134	89458370	MACS_peak_57640	998.39	1236	NM_021921	Mapk8ip2	998.39	9.89	17.64	60597	3230402N03Rik|AI847694|AW049958|IB2|Jip2|R75148
chr4	132553016	132553742	MACS_peak_131220	997.39	726	NM_172400	Dnajc8	997.39	10.92	12.81	68598	1110021D09Rik|2010009J04Rik|AL024084|AU019262|AU044514
chr13	45389741	45390043	MACS_peak_40582	996.92	302	NM_153789	Mylip	996.92	35.03	17.61	218203	9430057C20Rik|Mir
chr17	84185041	84187156	MACS_peak_63945	994.81	2115	NM_001001806	Zfp36l2	994.81	12.76	15.39	12193	Brf2|ERF2|Tis11d
chr8	121730558	121731004	MACS_peak_181143	993.72	446	NM_020605	Jph3	993.72	12.05	12.81	57340	JP-3|Jp3
chr13	97241104	97241529	MACS_peak_38762	990.5	425	NM_007930	Enc1	990.5	8.29	15.21	13803	Nrpb|PIG10
chr19	6324516	6325265	MACS_peak_91628	987.73	749	NM_001033342	Cdc42bpg	987.73	33.94	12.85	240505	BC046418|MRCKgamma
chr16	55902828	55903674	MACS_peak_73955	986.42	846	NM_028815	Cep97	986.42	26.44	12.82	74201	2810403B08Rik|4932439K18Rik|AA437768|E130116N02Rik|Lrriq2
chr8	31161790	31162473	MACS_peak_173992	985.3	683	NM_001199988	Tti2	985.3	19.7	12.81	234138	-
chr11	90638172	90638552	MACS_peak_31516	985.25	380	ENSMUST00000020851	Cox11	985.25	24.54	12.8	69802	2010004I09Rik
chr19	37021290	37021783	MACS_peak_93682	984.62	493	NM_198300	Cpeb3	984.62	19.05	12.79	208922	4831444O18Rik|CPE-BP3|mKIAA0940
chr6	37299562	37300063	MACS_peak_129576	982.07	501	ENSMUST00000090314	Dgki	982.07	7.38	17.68	320127	C130010K08Rik
chr6	131365044	131365405	MACS_peak_157970	981.64	361	NM_011733	Ybx3	981.64	8.18	12.79	56449	Csda|Dpba|MSY3|MSY4|Yb2|dbpA|oxyR
chr11	61072572	61073069	MACS_peak_27977	981.22	497	NM_010603	Kcnj12	981.22	42.36	12.79	16515	IRK-2|IRK2|Kir2.2|MB-IRK2
chr5	29735696	29736116	MACS_peak_104183	979.82	420	ENSMUST00000008733	Dnajb6	979.82	6.72	15.3	23950	Mrj|mDj4
chr12	44601164	44601846	MACS_peak_33050	977.1	682	NM_176930	Nrcam	977.1	19.9	17.64	319504	Bravo|C030017F07Rik|C130076O07Rik|mKIAA0343
chr8	70107440	70108649	MACS_peak_152115	973.9	1209	NM_007789	Ncan	973.9	8.4	17.61	13004	C230035B04|Cspg3|Cspg3-rs|Tgfbit
chr8	47674505	47675159	MACS_peak_175119	973.39	654	NM_023503	Ing2	973.39	16.66	12.95	69260	2810011M06Rik|Ing1l|Ing2b|P33ING2
chr18	37806409	37808977	MACS_peak_66288	972.11	2568	NM_033581	Pcdhgc3	972.11	6.63	15.73	93706	PC43|Pcdh2
chrX	142682290	142682898	MACS_peak_197594	972.04	608	NM_177592	Tmem164	972.04	22.09	12.93	209497	AI316850|AI852450|AW547186|F730011B02
chr4	106316212	106316786	MACS_peak_109876	971.27	574	NM_183225	Usp24	971.27	9.03	17.6	329908	2700066K03Rik|2810030C21Rik|AI414051|B130021E18|C79851
chr10	105573666	105574479	MACS_peak_21378	969.98	813	NM_177368	Tmtc2	969.98	29.94	12.92	278279	8430438D04Rik|D330034A10Rik
chr12	81493375	81493954	MACS_peak_40677	969.66	579	NM_025292	Synj2bp	969.66	20.07	12.91	24071	AA409442|ARIP2|ActRIP4|D12Wsu118e|OMP25
chr18	37143968	37146475	MACS_peak_74767	963.14	2507	NM_001003672	Pcdhac2	963.14	20.42	17.48	353237	CNRc2
chr5	38230560	38230990	MACS_peak_137840	963.07	430	NM_025281	Lyar	963.07	14.36	12.81	17089	MLZ-264
chr9	72925644	72925960	MACS_peak_163047	962.4	316	ENSMUST00000038489	Pygo1	962.4	15.73	17.45	72135	2600014C22Rik
chr8	83608174	83608542	MACS_peak_177725	960.96	368	NM_018808	Dnajb1	960.96	17.12	12.78	81489	0610007I11Rik|DjB1|HSPF1|Hdj1|Hsp40
chr19	11965843	11966296	MACS_peak_79294	960.6	453	NM_001033174	Osbp	960.6	14.28	17.41	76303	1110018F06Rik|AW559088|mKIAA4220
chr14	55092007	55092324	MACS_peak_56535	958.42	317	ENSMUST00000036328	Zfhx2	958.42	16.84	12.75	239102	ZFH-5
chr4	153482128	153482830	MACS_peak_114928	955.75	702	NM_001099299	Ajap1	955.75	20.22	17.48	230959	Gm573
chr7	15917207	15917539	MACS_peak_137430	954.88	332	NM_009156	Sepw1	954.88	7.98	17.43	20364	selW
chr2	30177592	30178429	MACS_peak_98329	953.02	837	uc008jbl.2	D2Wsu81e	953.02	11.57	12.78	227695	9930028P05|AL033358
chrX	53642487	53643763	MACS_peak_148986	946.88	1276	ENSMUST00000088779	Cxx1a	946.88	6.78	15.97	66158	1110012O05Rik|Mar8.2A/B|Mart8b
chr10	80287535	80288413	MACS_peak_16395	946.53	878	NM_001122605	Dazap1	946.53	15.7	17.54	70248	2410042M16Rik|mPrrp
chr5	134522585	134523142	MACS_peak_146077	946.31	557	NM_009990	Clip2	946.31	5.77	12.79	269713	B230327O20|CLIP-115|Clip1|Cyln2|WSCR4|mKIAA0291|wbscr4
chr1	118606907	118609462	MACS_peak_7312	942.08	2555	NM_029709	Clasp1	942.08	15.65	12.81	76707	1700030C23Rik|5730583A19Rik|B130045P17Rik|CLASP1alpha
chr9	121762618	121764121	MACS_peak_166354	941	1503	NM_001166644	Zfp651	941	14.64	17.59	270210	4732420M22Rik|BC030045|R74626
chr10	127091569	127093170	MACS_peak_17468	939.25	1601	NM_001033263	Agap2	939.25	6.04	16.02	216439	AGAP-2|Centg1|PIKE|cnt-g1|mKIAA0167
chr9	65346067	65347008	MACS_peak_162301	935.76	941	NM_016688	Pdcd7	935.76	19.08	17.66	50996	C80112|ES18
chr5	121220218	121220657	MACS_peak_144069	935.62	439	NM_181421	Gm15800	935.62	7.28	12.78	269700	A130010L24|AU042671|BC019639|EG545802|OTTMUSG00000026283|mKIAA0614
chr4	138456717	138458693	MACS_peak_132089	933.64	1976	NM_025451	Camk2n1	933.64	15.25	12.8	66259	1810006K23Rik|AI848599|AI891706
chr3	154763956	154764881	MACS_peak_103699	928.72	925	ENSMUST00000098496	BC007180	928.72	31.85	17.56	NA	NA
chr6	60815419	60815759	MACS_peak_152390	927.79	340	uc009cdp.2	Snca	927.79	5.51	12.86	20617	NACP|alphaSYN
chr2	73273124	73275105	MACS_peak_87655	926.58	1981	NM_001005343	Sp9	926.58	12.14	17.53	381373	-
chr11	70018465	70018949	MACS_peak_28840	920.15	484	ENSMUST00000108588	Dlg4	920.15	9.49	12.8	13385	Dlgh4|PSD-95|PSD95|SAP90|SAP90A
chr11	75692196	75692860	MACS_peak_29461	918.46	664	uc007keq.2	Crk	918.46	9.93	12.81	12928	Crk-I|Crk-II|Crk-III|Crk3|CrkIII|Crko|c-Crk|p38
chr6	115134901	115135460	MACS_peak_134568	916.85	559	NM_013681	Syn2	916.85	9.76	17.68	20965	2900074L19Rik|AI836018|AI841723
chr11	77982753	77983377	MACS_peak_29826	915.16	624	ENSMUST00000108360	Phf12	915.16	9.31	12.87	268448	2410142K10Rik|F630045O13|PF1|mKIAA1523
chr5	115157802	115158179	MACS_peak_109408	914.95	377	ENSMUST00000112121	Mlec	914.95	8.42	16.11	109154	2410014A08Rik|AI850530|ESTM19|X83352|mKIAA0152
chr10	45158231	45158944	MACS_peak_12276	912.75	713	NM_011156	Prep	912.75	10.26	16.19	19072	AI047692|AI450383|D10Wsu136e|PEP|Pop
chr10	31608383	31609725	MACS_peak_15363	911.66	1342	NM_001146349	Rnf217	911.66	10.21	12.98	268291	AU016819|Ibrdc1
chrX	20860510	20861609	MACS_peak_148422	902.89	1099	NM_013680	Syn1	902.89	5.13	16.62	20964	Syn-1|Syn1-S
chr2	32363197	32363656	MACS_peak_84938	902.6	459	NM_001252534	Ciz1	902.6	15.97	17.64	68379	0610038H21Rik|2900056O04Rik|LSFR1|ZNF356
chr1	187225502	187226219	MACS_peak_12809	902.38	717	NM_026367	Gpatch2	902.38	13.11	13.08	67769	5830433G22Rik|5830436K05Rik|AI427714|AI447508|AW107440|AW491060|Gpatc2
chr7	141010396	141010770	MACS_peak_147119	901.97	374	ENSMUST00000026565	Ifitm3	901.97	18.36	17.63	66141	1110004C05Rik|Cd225|Cdw217|DSPA2b|Fgls|IP15|mil-1
chr8	83669661	83670342	MACS_peak_153195	901.72	681	uc009mku.1	Ptger1	901.72	11.99	17.61	19216	42kDa|EP1|Ptgerep1
chrX	56454838	56455192	MACS_peak_167873	901.56	354	NM_172779	Ddx26b	901.56	29.59	17.6	236790	4930535D10Rik|6330505F04Rik|D130066O12
chr11	120762793	120764270	MACS_peak_27164	900.83	1477	ENSMUST00000105046	Hmga1-rs1	900.83	16.28	16.65	111241	ENSMUSG00000041059|Hmgi-rs1
chr2	165012835	165013162	MACS_peak_94133	896.56	327	NM_144892	Ncoa5	896.56	9.52	17.71	228869	CIA
chr2	154559858	154560935	MACS_peak_108288	896.27	1077	NM_007891	E2f1	896.27	24.31	13.2	13555	E2F-1|mKIAA4009
chr11	74830919	74831401	MACS_peak_29277	895.73	482	ENSMUST00000000291	Mnt	895.73	12.11	13.18	17428	Rox|bHLHd3
chr1	66425196	66425528	MACS_peak_3735	894.54	332	NM_008632	Map2	894.54	6.92	17.69	17756	G1-397-34|MAP-2|Mtap-2|Mtap2|repro4
chr5	115731121	115731621	MACS_peak_109526	894.18	500	ENSMUST00000055408	Ccdc64	894.18	11.09	16.78	75665	2210403N09Rik|BICDR-1
chr15	30646768	30647324	MACS_peak_62412	892.83	556	NM_008729	Ctnnd2	892.83	5.61	13.19	18163	Catnd2|Nprap|neurojugin
chr11	58009063	58009547	MACS_peak_27614	891.62	484	NM_028451	Larp1	891.62	10.86	13.17	73158	1810024J12Rik|3110040D16Rik|Larp|mKIAA0731
chr9	21635535	21635940	MACS_peak_183652	890.02	405	NM_011417	Smarca4	890.02	4.97	13.17	20586	Brg1|HP1-BP72|SNF2beta|SW1/SNF|b2b508.1Clo|b2b692Clo
chr5	122863986	122864591	MACS_peak_144402	889.8	605	uc008zmn.1	Rnf34	889.8	11.84	13.17	80751	AW061037|AW536122|BC004042|C88279|RIFF
chr14	34170654	34171168	MACS_peak_42228	887.33	514	ENSMUST00000104925	Rpl23a-ps3	887.33	5.23	16.89	100041163	Gm3174
chr6	71439997	71440607	MACS_peak_131374	885.84	610	NM_024288	Rmnd5a	885.84	8.83	17.68	68477	1110007A06Rik|AJ237586|AW125795|Gid2|MTA.D02.090
chr16	18283123	18284535	MACS_peak_70702	881.98	1412	uc007yne.1	Dgcr8	881.98	18.39	13.37	94223	D16H22S1742E|D16H22S788E|D16Wis2|Gy1|N41|Vo59c07|mir-1306
chr3	68494573	68495257	MACS_peak_98750	876.93	684	NM_001113419	Gm21949	876.93	8.42	17.74	100505386	Iqcj-schip1|Schip-1-iqcj|Schip1
chr2	181390866	181391468	MACS_peak_95651	874.38	602	ENSMUST00000029106	Zbtb46	874.38	20.76	17.73	72147	2610019F01Rik|4933406L05Rik|BZEL|Btbd4
chr6	6863796	6865150	MACS_peak_148434	874.16	1354	uc009awx.1	Dlx6as2	874.16	16.2	13.31	NA	NA
chrX	152233074	152233710	MACS_peak_198145	873.15	636	ENSMUST00000112584	Kdm5c	873.15	16.32	13.36	20591	D930009K15Rik|Jarid1c|Smcx|mKIAA0234
chrX	136667510	136668362	MACS_peak_169869	872.46	852	NM_001029978	Tceal3	872.46	6.24	17.7	594844	1100001D19Rik
chr7	24503511	24504539	MACS_peak_160453	867.46	1028	ENSMUST00000068023	Cadm4	867.46	5.5	13.37	260299	Igdf4c|Igsf4c|Tsll2
chr17	34970051	34972156	MACS_peak_80171	864.19	2105	NM_010479	Hspa1a	864.19	13.92	13.42	193740	Hsp70-3|Hsp70.3|Hsp72|hsp68|hsp70A1
chr8	115705471	115707794	MACS_peak_155383	863.27	2323	ENSMUST00000109104	Maf	863.27	9.35	17.78	17132	2810401A20Rik|A230108G15Rik|AW047063|c-maf
chr2	120539294	120539860	MACS_peak_80202	860.67	566	ENSMUST00000171215	Zfp106	860.67	8.13	17.47	20402	Cd-1|D2Dcr28|H3a|Sh3bp3|Znf106|sirm
chr7	127193346	127193930	MACS_peak_169871	859.14	584	NM_027353	Cd2bp2	859.14	8.95	13.37	70233	1500011B02Rik|2410024K20Rik|AW048183
chr7	97788540	97788974	MACS_peak_143644	855.72	434	uc009iju.1	Pak1	855.72	16.47	17.96	18479	AW045634|PAK-1|Paka
chr11	103649539	103650580	MACS_peak_32628	854.63	1041	NM_001033212	Rprml	854.63	16.15	13.35	104582	AW049332
chr17	70973919	70974496	MACS_peak_63280	854.19	577	ENSMUST00000038446	Myl12b	854.19	6.44	17.46	67938	1500001M02Rik|C77744|Mylc2b|RLC-B
chr11	69404005	69406173	MACS_peak_24719	852.58	2168	NM_001017426	Kdm6b	852.58	8.07	17.94	216850	1700064E03Rik|BC038313|Jmjd3|mKIAA0346
chr3	100922474	100922909	MACS_peak_117483	851	435	ENSMUST00000037409	Trim45	851	38.39	13.33	229644	4921530N01Rik
chr8	71348330	71349194	MACS_peak_176717	847.41	864	NM_001142322	Myo9b	847.41	7.46	13.36	17925	-
chr1	155932788	155933450	MACS_peak_9998	847.36	662	NM_001039184	Cep350	847.36	12.41	13.36	74081	4933409L06Rik|6430546F08Rik
chr6	85483825	85484863	MACS_peak_153957	846.28	1038	NM_001001160	Fbxo41	846.28	10.45	13.35	330369	9630017H13|D6Ertd538e
chr3	30936284	30937156	MACS_peak_112993	845.81	872	NM_153421	Phc3	845.81	8.03	13.33	241915	E030046K01Rik|Edr3|Hph3
chr7	44812255	44813520	MACS_peak_123887	844.65	1265	NM_030693	Atf5	844.65	5.13	17.45	107503	AFTA|Atf7|Atfx|ODA-10
chr11	100355689	100356141	MACS_peak_27879	843.5	452	NM_010404	Hap1	843.5	8.33	17.95	15114	HAP-1
chr19	53909111	53909414	MACS_peak_95201	842.36	303	NM_011050	Pdcd4	842.36	7.86	13.32	18569	D19Ucla1|Ma3|Tis
chr4	124751311	124751692	MACS_peak_130040	841	381	NM_008385	Inpp5b	841	15.4	13.29	16330	5PTase|AW260155|INPP5P
chr2	78869046	78869405	MACS_peak_87952	839.65	359	NM_009454	Ube2e3	839.65	8.45	18.02	22193	Ubce4|ubcM2
chr16	13948639	13949619	MACS_peak_70225	837.83	980	NM_033564	Mpv17l	837.83	17.68	13.32	93734	M-LP
chr2	29802633	29802960	MACS_peak_84503	835.52	327	ENSMUST00000080065	Slc27a4	835.52	23.65	17.98	26569	BB144259|FATP4
chr13	85288395	85289486	MACS_peak_42930	835.21	1091	NM_145452	Rasa1	835.21	7.33	17.97	218397	Gap|RasGAP|Rasa
chr5	140620577	140623531	MACS_peak_112385	833.48	2954	NM_175274	Ttyh3	833.48	5.3	17.55	78339	2900029G13Rik|AI414930|TTY3|mTTY3
chr9	108493560	108493863	MACS_peak_165205	833.03	303	NM_001168371	Usp19	833.03	17.96	17.99	71472	8430421I07Rik|AI047774|Zmynd9
chr9	7751671	7752325	MACS_peak_182489	826.68	654	ENSMUST00000098994	Gm10709	826.68	8.1	13.22	100039782	ENSMUSG00000074516
chr9	20873541	20874245	MACS_peak_158088	824.23	704	NM_175687	A230050P20Rik	824.23	13.4	18.14	319278	RyDEN
chr19	7341167	7341757	MACS_peak_91811	824.07	590	NM_007928	Mark2	824.07	13.82	13.22	13728	EMK-1|Emk|Par-1|Par-1b
chr9	110244908	110245694	MACS_peak_165400	822.05	786	NM_013884	Cspg5	822.05	7.45	18.24	29873	Caleb|Ngc
chr17	28806775	28807399	MACS_peak_79398	821.07	624	NM_001081315	Brpf3	821.07	18.39	13.17	268936	AI413466|AW493400|mKIAA1286
chr10	42274815	42275598	MACS_peak_13827	820.96	783	uc007eyo.1	Foxo3	820.96	12.41	18.25	56484	1110048B16Rik|2010203A17Rik|C76856|FKHRL1|Fkhr2|Foxo3a
chr14	55886562	55887414	MACS_peak_56603	817.77	852	NM_027143	Khnyn	817.77	14.23	13.17	219094	6330555F21|9130227C08Rik|AI605259|Kiaa0323|mKIAA0323
chr14	103688061	103688403	MACS_peak_59433	817.46	342	NM_198014	Slain1	817.46	6.73	13.15	105439	9630044O09Rik|AA675320|AW742596
chr4	141471369	141479389	MACS_peak_113665	814.42	8020	NM_019763	Spen	814.42	11.63	18.34	56381	Mint|mKIAA0929
chr4	49844382	49845769	MACS_peak_94636	814.15	1387	NM_001033351	Grin3a	814.15	19.18	18.02	242443	6430537F04|A830097C19Rik|NMDAR-L|NR3A|mKIAA1973
chr1	172498493	172498878	MACS_peak_11543	813.78	385	ENSMUST00000111235	Igsf9	813.78	28.13	13.24	93842	644ETD8|Dasm1|Kiaa1355-hp|NRT1|Ncaml|mKIAA1355
chr5	115327176	115327499	MACS_peak_143310	812.3	323	NM_025573	Srsf9	812.3	17.8	13.24	108014	25kDa|2610029M16Rik|SRp30c|Sfrs9
chr1	87213938	87214495	MACS_peak_5904	810.69	557	NM_001039169	Eif4e2	810.69	7.13	13.24	26987	2700069E09Rik|AI036339|AV129531|D0H0S6743E|Eif4el3
chr15	76249216	76249904	MACS_peak_49680	810.57	688	NM_023168	Grina	810.57	5.9	17.99	66168	1110025J15Rik|Lag|Tmbim3
chr8	47990065	47990551	MACS_peak_150981	809.81	486	NM_133791	Wwc2	809.81	10.52	18.49	52357	5330431C14Rik|AU022508|C85457|D8Ertd594e
chr8	82763619	82764491	MACS_peak_177599	808.54	872	NM_145600	Zfp330	808.54	10.29	13.3	30932	BC008086|Noa36|Znf330
chrX	101319418	101324101	MACS_peak_196486	808.49	4683	ENSMUST00000065858	Nlgn3	808.49	8.17	13.3	245537	A230085M13Rik|HNL3|NL3
chr13	107889396	107890064	MACS_peak_44124	805.94	668	uc007ruq.2	Zswim6	805.94	13.26	18.5	67263	2900036G02Rik|mKIAA1577
chr18	70568188	70568967	MACS_peak_89620	805	779	ENSMUST00000074058	Mbd2	805	9.85	13.29	17191	MBD2a
chr7	120903281	120903840	MACS_peak_169237	804.25	559	NM_007908	Eef2k	804.25	12.51	13.28	13631	C86191|eEF-2K
chr8	4212885	4215081	MACS_peak_147702	802.86	2196	NM_207203	Prr36	802.86	6.87	18.45	73072	-
chr15	76710642	76711125	MACS_peak_65464	802.85	483	ENSMUST00000137649	Lrrc14	802.85	30.12	13.36	223664	E130306I01Rik|mKIAA0014
chr13	49341548	49341910	MACS_peak_40963	802.61	362	NM_029791	Bicd2	802.61	17.05	18.43	76895	-
chr7	28466588	28467548	MACS_peak_123028	802.24	960	NM_001141921	Lrfn1	802.24	5.99	18.01	80749	BC004018|SALM2|Semo1
chr17	56597769	56599672	MACS_peak_70210	802.24	1903	uc008dck.2	Safb	802.24	14.21	18.43	224903	3110021E02Rik|5330423C17Rik|AU018122|D18386|E130307D12|HAP|HET|SAF-B1|SAFB1
chr7	140069879	140070664	MACS_peak_170957	800.93	785	NM_001190385	Caly	800.93	7.28	13.35	68566	0710001P07Rik|1110004A22Rik|Calcyon|Drd1ip
chr11	69935795	69936248	MACS_peak_24786	797.82	453	ENSMUST00000018698	Ybx2	797.82	39.2	18.51	53422	Msy2
chr19	44992135	44992638	MACS_peak_94445	797.67	503	ENSMUST00000179305	Sema4g	797.67	7.2	13.44	26456	AI507908|AW554132
chr11	23333438	23333859	MACS_peak_24678	796.08	421	NM_001190401	Usp34	796.08	8.93	13.46	17847	A530081C03Rik|Murr2
chr12	112784914	112785595	MACS_peak_43856	795.6	681	ENSMUST00000124526	Ahnak2	795.6	21.38	13.45	100041194	AI450948|Gm1185|Gm72
chr18	34846400	34847463	MACS_peak_86494	793.42	1063	NM_144865	Reep2	793.42	8.47	13.48	225362	-
chr5	34465573	34466447	MACS_peak_117858	792.98	874	NM_001243123	Fam193a	792.98	10.73	18.71	231128	-
chrX	18258420	18258968	MACS_peak_193971	792.35	548	uc009ssk.1	Kdm6a	792.35	22.76	13.47	22289	Utx
chr17	34605860	34606171	MACS_peak_68909	788.47	311	NM_001163379	Agpat1	788.47	16.08	18.75	55979	1-AGP|1-AGPAT|AW047140
chr5	139800929	139801837	MACS_peak_126414	787.3	908	NM_010757	Mafk	787.3	17.71	18.76	17135	AW061068|NF-E2|Nfe2u
chr14	93890120	93890669	MACS_peak_59083	787.26	549	NM_001271798	Pcdh9	787.26	8.32	13.54	211712	-
chr9	108139186	108139595	MACS_peak_165156	785.9	409	NM_007567	Bsn	785.9	7.7	18.79	12217	-
chr16	94570009	94570534	MACS_peak_65560	785.79	525	ENSMUST00000119878	Dyrk1a	785.79	9.99	18.78	13548	2310043O08Rik|D16Ertd272e|D16Ertd493e|Dyrk|ENSMUSG00000074897|Gm10783|Mnbh|Mp86|mmb
chr17	80727793	80728093	MACS_peak_71731	785.11	300	uc008drk.1	Map4k3	785.11	7.43	18.82	225028	4833416M01Rik|4833416M07Rik|9530052P13Rik|Glk|MAPKKKK3|MEKKK 3|MEKKK3|RAB8IPL1
chr10	13966378	13966697	MACS_peak_14428	783.99	319	NM_010437	Hivep2	783.99	11.9	13.52	15273	Gm20114|MIBP1|Schnurri-2|Shn-2
chrX	60548007	60548671	MACS_peak_195102	782.41	664	NM_001271548	Gm715	782.41	30.79	13.5	279618	-
chr19	10869538	10869940	MACS_peak_70281	781.98	402	ENSMUST00000025645	Tmem132a	781.98	7.58	18.28	98170	6720481D13Rik|Hspa5bp1|Orai1|R74613
chr2	109897245	109897959	MACS_peak_104212	780.97	714	NM_011699	Lin7c	780.97	9.66	13.5	22343	9130007B12Rik|AI303698|AU019331|AW125731|D2Ertd520e|LIN-7-C|LIN-7C|MALS-3|Veli3
chr5	3802596	3803124	MACS_peak_134392	778.52	528	NM_001003909	Ankib1	778.52	9.32	13.57	70797	2310061P20Rik|4631416I11Rik|AW494740|C80642|mKIAA1386
chr11	6599375	6602918	MACS_peak_24011	778.16	3543	NM_001081652	Nacad	778.16	6.76	13.56	192950	D230024G13Rik|mKIAA0363
chr5	37291116	37292163	MACS_peak_137751	775.67	1047	NM_007765	Crmp1	775.67	3.86	13.56	12933	CRMP-1|DRP-1|Dpysl1|ULIP-3|Ulip3
chr11	77777234	77778791	MACS_peak_22617	773.79	1557	uc007khf.1	Myo18a	773.79	6.1	18.15	360013	MAJN|MyoPDZ|MysPDZ
chr7	24978166	24979005	MACS_peak_122623	772.13	839	ENSMUST00000102858	Atp1a3	772.13	4.92	18.24	232975	Atpa-2
chr1	172082528	172082949	MACS_peak_8618	771.54	421	NM_009938	Copa	771.54	9.46	18.31	12847	AU040324|xenin
chr10	81544791	81545190	MACS_peak_14698	763.8	399	ENSMUST00000043604	Gna11	763.8	5.5	18.7	14672	Dsk7|E430025L19
chr4	123409546	123410950	MACS_peak_111242	761.72	1404	NM_001167918	D830031N03Rik	761.72	15.71	19.12	442834	Kiaa0754|mKIAA0754
chr3	133469275	133469748	MACS_peak_102477	760.59	473	uc008rkp.2	Tet2	760.59	10.57	19.13	214133	Ayu17-449|E130014J05Rik|mKIAA1546
chr11	69734025	69735566	MACS_peak_24762	760.53	1541	NM_001291068	Polr2a	760.53	8.91	19.12	20020	220kDa|Rpb1|Rpo2-1
chr15	102089865	102090195	MACS_peak_58806	759.35	330	uc011zzw.1	Eif4b	759.35	5.54	19.13	75705	2310046H11Rik|AL024095|C85189|Eif4a2
chr5	142721338	142722490	MACS_peak_112566	759.17	1152	NM_146257	Slc29a4	759.17	4.37	18.94	243328	ENT4|mPMAT
chr13	110395047	110395634	MACS_peak_44335	759.02	587	uc007rvr.1	Plk2	759.02	6.08	19.11	20620	Snk
chr6	129533191	129533536	MACS_peak_135752	756.68	345	NM_020590	Gabarapl1	756.68	7.06	19.12	57436	3110025G09Rik|9130422N19Rik|AI196471|Apg8l|Atg8l|GECI|MNCb-0091
chr19	7268306	7269088	MACS_peak_78972	755.39	782	ENSMUST00000066646	Rcor2	755.39	21.39	19.19	104383	1A13|AW122124|CoREST|Rcor|Rcor1
chr7	25315396	25316126	MACS_peak_122692	755.34	730	NM_183311	Tmem145	755.34	7.95	18.87	330485	B930076A02Rik
chr15	82169737	82170154	MACS_peak_56750	755.06	417	NM_033218	Srebf2	755.06	7.03	19.17	20788	AI608257|SREBP-2|SREBP2|SREBP2gc|bHLHd2|lop13|nuc
chr12	5031492	5032176	MACS_peak_35621	752.86	684	NM_001099628	Atad2b	752.86	9.98	13.92	320817	1110014E10Rik|BC032887|C79189|D530031C13Rik
chr4	134127405	134127806	MACS_peak_99995	752.62	401	NM_080559	Sh3bgrl3	752.62	5.18	18.9	73723	1110004L05Rik|AU022188
chr2	126742123	126742681	MACS_peak_105702	751.33	558	NM_019729	Usp8	751.33	12.19	13.95	84092	AI574262|AW557536|Ubpy|mKIAA0055
chr6	82652623	82652929	MACS_peak_117244	750.68	306	ENSMUST00000095786	Pole4	750.68	11.48	18.82	66979	2400007P05Rik|5830430F06Rik
chr7	30588354	30588726	MACS_peak_138742	750.68	372	NM_029274	Kmt2b	750.68	22.19	19.11	75410	2610014H22Rik|Mll2|Wbp7|mKIAA0304
chr12	108003085	108003602	MACS_peak_43205	748.57	517	ENSMUST00000066060	Bcl11b	748.57	8.49	13.91	58208	9130430L19Rik|AI604821|B630002E05Rik|BCL-11B|Ctip2|Rit1
chr16	4117254	4117668	MACS_peak_59048	747.88	414	NM_001025432	Crebbp	747.88	10.41	19.15	12914	AW558298|CBP|CBP/p300|KAT3A|p300/CBP
chr17	45541939	45545954	MACS_peak_61637	746.31	4015	NM_001013749	Tmem151b	746.31	6.87	18.75	210573	Gm323
chr7	25363321	25365911	MACS_peak_160585	744.77	2590	NM_001160400	Megf8	744.77	16.8	13.87	269878	AW049492|Egfl4|b2b1702.2Clo|b2b1702Clo|b2b288Clo|m687Ddg|mKIAA0817
chr2	92599706	92600148	MACS_peak_103169	743.6	442	NM_023850	Chst1	743.6	10.02	13.93	76969	2610008E20Rik|AW125896|C6ST|GST-1|Gst1|KSGAL6ST
chr11	4939286	4940699	MACS_peak_20397	742.72	1413	NM_010904	Nefh	742.72	25.19	19.21	380684	NF-H|NF200|Nfh|mKIAA0845
chr2	3304811	3305428	MACS_peak_96032	742.44	617	uc008idp.1	Nmt2	742.44	11.92	14.04	18108	A930001K02Rik|AI605445|AU044698|hNMT-2
chr5	135934322	135934641	MACS_peak_111851	738.04	319	NM_018871	Ywhag	738.04	5.82	18.98	22628	14-3-3gamma|D7Bwg1348e
chr17	34632083	34633123	MACS_peak_68917	737.15	1040	ENSMUST00000015620	Prrt1	737.15	9.79	19.2	260297	Bat-4|Bat4|D17H6S54E|DSPD1|G5b|NG5|ORF31
chr2	165812348	165812858	MACS_peak_109762	736.93	510	NM_027230	Zmynd8	736.93	7.34	14.11	228880	1110013E22Rik|2010005I16Rik|3632413B07Rik|AI316811|AL024039|Prkcbp1|RACK7
chr5	110755396	110756766	MACS_peak_108751	736.08	1370	NM_029337	Ep400	736.08	4.93	18.9	75560	1700020J09Rik|AU023439|mDomino|mKIAA1498|p400
chr7	125662075	125662447	MACS_peak_145926	735.68	372	uc009jqj.1	Gtf3c1	735.68	13.23	19.22	233863	-
chr3	62338716	62340573	MACS_peak_87338	735.17	1857	ENSMUST00000079300	Arhgef26	735.17	7.76	19.02	622434	4631416L12Rik|8430436L14Rik|AI303572|AW491953|SGEF
chr8	87959195	87959527	MACS_peak_153655	734.59	332	NM_033327	Zfp423	734.59	16.41	19.17	94187	Ebfaz|Roaz|Zfp104|Znf423|ataxia1|mKIAA0760|nur12
chr17	57031147	57031507	MACS_peak_81614	733.18	360	NM_010613	Khsrp	733.18	8.76	14.2	16549	6330409F21Rik|Fbp2|Fubp2|Ksrp
chr3	75894834	75895137	MACS_peak_115522	732.7	303	NM_175193	Golim4	732.7	18.65	14.19	73124	3110027H23Rik|GIMPC|GPP130|Golph4|P138
chr10	62581214	62581708	MACS_peak_17550	732.56	494	NM_019553	Ddx21	732.56	10.59	14.18	56200	AI255159|AL022742|D10Ertd645e|D10Wsu42e
chr11	98348403	98349174	MACS_peak_32086	731.56	771	ENSMUST00000078694	Ppp1r1b	731.56	10.31	14.19	19049	AU040756|DARPP-32|Darpp32
chr1	181921657	181922500	MACS_peak_10638	731.12	843	NM_008680	Enah	731.12	6.13	19.11	13800	Mena|NDPP-1|Ndpp1|WBP8
chr4	44167626	44168005	MACS_peak_123944	728.74	379	ENSMUST00000143337	Rnf38	728.74	14.44	14.2	73469	1700065B19Rik|2610202O07Rik|AA673263|Oip1
chr18	32079670	32080577	MACS_peak_86223	726.32	907	NM_173441	Iws1	726.32	9.39	14.15	73473	1700069O15Rik|3000008H23|AL117927|AW214353
chr7	44351556	44354644	MACS_peak_123801	725.21	3088	NM_001034115	Shank1	725.21	5.55	19.39	243961	-
chr13	78198119	78199757	MACS_peak_49628	725.06	1638	ENSMUST00000091458	Nr2f1	725.06	5.08	14.21	13865	COUP-TF1|COUP-TFI|COUPTFA|EAR3|Erbal3|SVP44|Tcfcoup1
chr2	155405474	155408450	MACS_peak_82784	724.53	2976	NM_019825	Ncoa6	724.53	6.12	19.36	56406	AIB3|ASC-2|ASC2|NRC|Ncoa7|PRIP|RAP250|mKIAA0181
chr5	88565039	88565476	MACS_peak_120883	724.47	437	NM_001289774	Rufy3	724.47	13.32	19.36	52822	2810428M05Rik|6330416M07Rik|AW455998|AW538594|D5Bwg0860e|Ripx|Rpipx
chr13	54679749	54681811	MACS_peak_41326	723.11	2062	NM_134064	Rnf44	723.11	9.29	19.33	105239	AI854545|mKIAA1100
chr5	134558466	134560171	MACS_peak_125687	722.49	1705	NM_001013751	Syna	722.49	17.48	19.38	214292	Gm453|Gm52|syncytin-A
chr15	99422217	99422908	MACS_peak_58480	722.19	691	NM_001001884	Nckap5l	722.19	12.8	19.36	380969	C230021P08Rik|Cep169
chr12	84172753	84174423	MACS_peak_35608	721.41	1670	NM_001163501	Elmsan1	721.41	10.13	19.34	238317	9430029N19Rik|C130039O16Rik|Gm260
chr5	123355940	123356536	MACS_peak_144490	720.73	596	uc008znn.2	Bcl7a	720.73	10.28	14.24	77045	4432415N06Rik|AI448316
chr17	56393717	56394106	MACS_peak_70184	720.28	389	NM_172132	Kdm4b	720.28	6.72	19.43	193796	4732474L06Rik|Jmjd2b|mKIAA0876
chr18	24603286	24603817	MACS_peak_85683	719.06	531	NM_139143	Slc39a6	719.06	13.11	14.26	106957	Ermelin
chr2	157078228	157079265	MACS_peak_83083	717.52	1037	NM_001164663	Soga1	717.52	7.69	19.3	320706	9830001H06Rik|AI426038|D430036N24Rik|Soga
chr11	75574049	75577561	MACS_peak_29425	714.05	3512	NM_173388	Slc43a2	714.05	17.79	14.34	215113	7630402D21Rik|BC042513|Lat4
chr9	27029398	27030094	MACS_peak_183974	712.72	696	NM_178027	Vps26b	712.72	6.37	14.37	69091	1810012I05Rik|2310075A12Rik|AI848392
chr8	4257645	4258647	MACS_peak_147711	711.36	1002	NM_183315	Ctxn1	711.36	4.2	19.41	330695	BC028881|Ctxn
chr7	30522225	30523846	MACS_peak_161272	710.44	1621	NM_178252	Arhgap33	710.44	3.33	14.35	233071	AW324378|NOMA-GAP|Snx26|TCGAP
chr8	88199930	88200502	MACS_peak_178283	709.24	572	NM_001164497	Papd5	709.24	7.68	14.39	214627	5730445M16Rik|5830428A09
chrX	103356475	103356889	MACS_peak_196602	708.86	414	NM_009767	Chic1	708.86	12.43	14.38	12212	Brx|ENSMUSG00000073019|Gm10454
chr16	46009693	46010413	MACS_peak_73679	707.89	720	NM_001134480	Plcxd2	707.89	12.63	14.39	433022	AW494639|EG433022
chr2	156700605	156701674	MACS_peak_83024	707.14	1069	NM_146128	Dlgap4	707.14	6.45	19.24	228836	AI225853|BC024558|DAP-4|DAP4|SAPAP-4|Sapap4|WBP16
chr5	31192581	31193139	MACS_peak_136806	705.1	558	NM_001127356	Eif2b4	705.1	14.52	14.43	13667	Eif2b
chr11	98001507	98003362	MACS_peak_32015	704.76	1855	NM_145121	Cacnb1	704.76	14	14.42	12295	CAB1|Cchb1|Cchlb1
chr11	97500108	97502402	MACS_peak_24415	703.01	2294	ENSMUST00000121799	Arhgap23	703.01	9.1	19.23	58996	A330041B18Rik
chr5	138100589	138101561	MACS_peak_146615	701.78	972	NM_029869	Zkscan1	701.78	5.98	14.48	74570	5930429A01Rik|9130423L19Rik|9230118B16Rik|AI646829|AI788588|C87323|KOX18|PHZ-37|ZNF139
chr12	8990487	8991677	MACS_peak_35874	701.69	1190	uc007nah.2	Wdr35	701.69	26.12	14.5	74682	4930459M12Rik|4931430C06|mKIAA1336
chr19	8965033	8966210	MACS_peak_91927	700.4	1177	NM_197993	Tut1	700.4	14.16	14.48	70044	2700038E08Rik|PAPD2|Rbm21|TUTase6
chr14	123277888	123278361	MACS_peak_60801	698.92	473	NM_177393	Nalcn	698.92	14.52	14.46	338370	A530023G15Rik|AI849508|Vgcnl1
chr17	35237116	35238768	MACS_peak_80215	698.38	1652	uc008cgx.2	Atp6v1g2	698.38	10.12	14.45	66237	1500002D01Rik|Atp6g2|NG38|VAG2
chr3	51560517	51560878	MACS_peak_114012	695.76	361	ENSMUST00000037141	Setd7	695.76	16.89	14.48	73251	1600028F23Rik|H3K4MT|KMT7|Set7|Set7/9|mKIAA1717
chr17	57080065	57081747	MACS_peak_62500	693.89	1682	NM_009451	Tubb4a	693.89	4.22	19.26	22153	AI325297|M(beta)4|Tubb|Tubb4
chr11	67854689	67855128	MACS_peak_28550	692.14	439	NM_173754	Usp43	692.14	28.57	14.59	216835	-
chr18	37294839	37295291	MACS_peak_74776	689.06	452	NM_053127	Pcdhb2	689.06	13.51	19.76	93873	PcdhbB
chr9	58859300	58860955	MACS_peak_187563	686.52	1655	NM_001081192	Hcn4	686.52	17.87	14.67	330953	Bcng3|Hcn3
chr5	124410069	124410382	MACS_peak_144693	685.7	313	NM_001081203	Sbno1	685.7	8.79	14.67	243272	9330180L10Rik|AI849128|AW557836|BC021875|Sbno|mSno1|sno
chr13	55569704	55571120	MACS_peak_48073	685.16	1416	NM_145382	Fam193b	685.16	15.85	14.73	212483	IRIZIO|Kiaa1931
chrX	7374568	7375830	MACS_peak_193504	683.94	1262	NM_019461	Usp27x	683.94	14.15	14.7	54651	Sfc11|Usp27
chr19	59463879	59464884	MACS_peak_95863	683.55	1005	NM_010132	Emx2	683.55	11.83	14.69	13797	Pdo
chr4	148164074	148164455	MACS_peak_133053	682.25	381	NM_176848	Fbxo2	682.25	9.26	14.72	230904	FBG1|FBX2|Fbs1|Fbs2|NFB42|Prpl4
chr11	32422022	32428144	MACS_peak_19212	682.06	6122	NM_177364	Sh3pxd2b	682.06	4.67	19.15	268396	G431001E03Rik|TSK4|fad49
chr17	47924205	47924645	MACS_peak_61973	678.49	440	ENSMUST00000113265	Foxp4	678.49	20.25	19.24	74123	1200010K03Rik|2310007G05Rik|mFKHLA
chr14	77251800	77252327	MACS_peak_44652	676.7	527	ENSMUST00000099431	Gm10132	676.7	8.88	19.24	100043755	ENSMUSG00000063556
chr2	38339280	38339805	MACS_peak_85710	676.28	525	NM_001290646	Lhx2	676.28	14.57	20.11	16870	LH2A|Lh-2|Lim2|ap|apterous
chr11	29692897	29693693	MACS_peak_18958	673.93	796	NM_194052	Rtn4	673.93	10.21	19.27	68585	1110020G17Rik|AA407876|AA409940|AA960376|ASY|C130026I10Rik|NOGO|NSP-CL|NgA|Nogo-A|Nogo-B|Nogo-C|mKIAA0886|mKIAA4153
chr7	45492894	45493949	MACS_peak_139573	671.15	1055	NM_008749	Nucb1	671.15	11.67	20.21	18220	B230337F23Rik|C77483|Calnuc|MTEST82|Nucb
chr19	6940482	6941193	MACS_peak_69939	671.12	711	NM_207220	Gpr137	671.12	13.86	19.37	107173	AI428855
chrX	7841830	7842710	MACS_peak_166736	670.76	880	NM_138604	Otud5	670.76	11.74	20.28	54644	AA407879|AI553596|BB114028|DUBA|DXImx46e|Sfc7
chr14	99301380	99302254	MACS_peak_45175	667.16	874	NM_009769	Klf5	667.16	7.91	19.28	12224	4930520J07Rik|Bteb2|CKLF|IKLF
chr9	52143955	52144426	MACS_peak_161117	666.02	471	NM_001162921	Zc3h12c	666.02	15.45	20.22	244871	A230108E06|C230027N18Rik|mKIAA1726
chr1	9745449	9748382	MACS_peak_436	663.64	2933	NM_173443	Vcpip1	663.64	11.46	15.04	70675	4932442A08|5730421J18Rik|5730538E15Rik|VCIP135|mKIAA1850
chr15	79163288	79163794	MACS_peak_65825	662.24	506	NM_011437	Sox10	662.24	19.03	15.06	20665	Dom|Sox21|gt
chr1	132390976	132391281	MACS_peak_8565	661.66	305	NM_178874	Tmcc2	661.66	7.2	15.05	68875	1110063G11Rik
chr9	79819002	79820480	MACS_peak_189531	660.65	1478	NM_001081243	Filip1	660.65	15.9	15.02	70598	5730485H21Rik|AI843021
chr6	37870810	37871474	MACS_peak_150668	659.7	664	NM_145076	Trim24	659.7	14.34	15.01	21848	A130082H20Rik|AI447469|D430004I05Rik|TIF1|TIF1-alpha|TIF1alpha|Tif1a
chr13	10360263	10360803	MACS_peak_44888	659.68	540	NM_033269	Chrm3	659.68	17.61	15	12671	Chrm-3|M3|M3R
chr6	29609365	29609887	MACS_peak_128741	658.82	522	ENSMUST00000012679	Tnpo3	658.82	9.2	20.36	320938	5730544L10Rik|C430013M08Rik|C81142|D6Ertd313e|Trn-SR|mKIAA4133
chr17	50509546	50509937	MACS_peak_69885	658.39	391	NM_013880	Plcl2	658.39	6.94	20.34	224860	PLC-L2|PRIP-2|Plce2|mKIAA1092
chr6	87628608	87629461	MACS_peak_132522	657.71	853	NM_024251	Aplf	657.71	34.8	20.35	72103	2010301N04Rik|AI452191
chr15	78173768	78174104	MACS_peak_56181	657.36	336	NM_025931	Ift27	657.36	14.19	20.36	67042	2600013G09Rik|Rabl4
chr15	99527579	99528165	MACS_peak_68176	656.56	586	NM_028224	Faim2	656.56	16.66	15.05	72393	2900002L20Rik|Lfg|Lfg2|NMP25|Nmp35|Tmbim2
chr12	113140235	113140614	MACS_peak_43934	656.33	379	NM_024223	Crip2	656.33	9.81	15.07	68337	0610010I23Rik|AW743261|C77570|CRP2|CRP4|Crp|ESP1|Hlp
chr7	90130231	90130702	MACS_peak_165975	655.48	471	NM_146194	Picalm	655.48	8.1	15.04	233489	CALM|CLTH|PAP180|fit-1|fit1|mKIAA4114
chr8	95888216	95888547	MACS_peak_178986	653.14	331	ENSMUST00000034097	Got2	653.14	11.21	15.07	14719	AL022787|FABP-pm|Got-2|Kyat4|mAspAT
chr15	77760584	77762016	MACS_peak_49861	653.13	1432	NM_022410	Myh9	653.13	8.74	19.39	17886	Fltn|Myhn-1|Myhn1|NMHCIIA|NMMHC-A|NMMHC-IIA|TU72.6
chr9	61372365	61373461	MACS_peak_143505	653.07	1096	NM_009389	Tle3	653.07	7.3	19.37	21887	2610103N05Rik|ESG|Grg3a|Grg3b|mKIAA1547
chr8	14831232	14831758	MACS_peak_148774	652.96	526	uc009kyz.1	Dlgap2	652.96	17.43	20.5	244310	6430596N04Rik|DAP2|Sapap2
chr3	34650004	34652119	MACS_peak_113476	652.93	2115	NM_011443	Sox2	652.93	5.6	15.07	20674	Sox-2|lcc|ysb
chr3	105452329	105452717	MACS_peak_101143	652.07	388	NM_001039347	Kcnd3	652.07	12.16	20.55	56543	AW045978|Kncd3|Kv4.3
chr7	65370809	65371244	MACS_peak_164126	651.09	435	NM_009386	Tjp1	651.09	12.01	15.07	21872	ZO1
chr14	35582763	35583210	MACS_peak_55453	650.27	447	ENSMUST00000043349	Grid1	650.27	21.55	15.05	14803	GluD1|GluRdelta1
chr16	20673516	20673961	MACS_peak_54259	649.47	445	ENSMUST00000115460	Eif4g1	649.47	6.95	19.56	208643	E030015G23Rik|eIF-4-gamma 1|eIF-4G 1|eIF-4G1|eIF4GI
chr15	74588686	74589464	MACS_peak_49559	648.23	778	NM_174991	Adgrb1	648.23	4.63	19.54	107831	B830018M07Rik|Bai1|R75078|mKIAA4089
chr11	97551676	97551978	MACS_peak_24422	647.95	302	NM_018873	Srcin1	647.95	8.94	19.52	56013	P140|SNIP|mKIAA1684|p140Cap
chr10	40832310	40832942	MACS_peak_15992	646.2	632	NM_027879	Cdc40	646.2	8.91	15.04	71713	1200003H23Rik|EHB3|PRP17
chr16	11403459	11403836	MACS_peak_69884	644.97	377	ENSMUST00000115814	Snx29	644.97	9.09	15.04	74478	4933437K13Rik|ENSMUSG00000079738|Gm11170|Gm1737|Gm930|Rundc2a
chr14	50924977	50925324	MACS_peak_48233	644.42	347	ENSMUST00000154288	Apex1	644.42	7.34	20.64	11792	APE|Apex|HAP1|Ref-1
chr3	105716368	105717974	MACS_peak_117939	643.84	1606	NM_175398	Fam212b	643.84	13.55	15.03	109050	6530418L21Rik|inka2
chr11	115412200	115412674	MACS_peak_26188	640.36	474	ENSMUST00000153983	Ict1	640.36	10.09	19.34	68572	1110001A02Rik|1110002E03Rik|MRP-L58
chr7	117380978	117381520	MACS_peak_145249	639.33	542	NM_175645	Xylt1	639.33	10.73	20.65	233781	8030490L12
chr10	80798197	80798805	MACS_peak_14562	639.03	608	ENSMUST00000148665	Sf3a2	639.03	12.3	19.38	20222	66kDa|AW047242|PRP11|SFA66|Sap62
chr14	32526148	32526878	MACS_peak_55098	638.81	730	NM_001081221	Ercc6	638.81	11.11	15.11	319955	4732403I04|C130058G22Rik|CSB
chr13	16026242	16027211	MACS_peak_45397	638.75	969	NM_008380	Inhba	638.75	15.19	15.11	16323	-
chr4	62522729	62524110	MACS_peak_125338	638.05	1381	ENSMUST00000030091	Pole3	638.05	11.76	15.12	59001	1810034K18Rik|YBL1
chr10	93970007	93970842	MACS_peak_20882	637.94	835	NM_001304572	Vezt	637.94	8.89	15.11	215008	A630071D13Rik|AI848282
chr15	76667203	76668196	MACS_peak_55963	637.7	993	NM_010630	Kifc2	637.7	6.28	20.6	16581	-
chr2	167055615	167056941	MACS_peak_94407	636.57	1326	NM_001033196	Znfx1	636.57	20.63	20.61	98999	AI481105|Astx3
chr9	34488703	34489158	MACS_peak_159318	636	455	uc009osg.1	Kirrel3	636	16.97	20.7	67703	1500010O20Rik|2900036G11Rik|NEPH2|SST4|mKIAA1867
chr7	44852570	44852959	MACS_peak_123897	635.4	389	NM_026270	Akt1s1	635.4	8.68	19.41	67605	1110012J22Rik|AI227026|Lobe|Lobel|PRAS40
chrX	134749680	134750204	MACS_peak_169789	634.6	524	NM_001007578	Armcx6	634.6	13.16	20.74	278097	AW060994
chr4	107834626	107834990	MACS_peak_110071	632.41	364	uc008uah.1	Lrp8	632.41	11.07	20.75	16975	4932703M08Rik|AA921429|AI848122|ApoER2|Lr8b
chr7	141190930	141191467	MACS_peak_130746	632.35	537	NM_001130443	Hras	632.35	7.42	19.49	15461	H-ras|Ha-ras|Harvey-ras|Hras-1|Hras1|Kras2|c-H-ras|c-Ha-ras|c-rasHa|ras
chr7	123000662	123002232	MACS_peak_145801	629.92	1570	NM_011247	Rbbp6	629.92	4.98	20.69	19647	4933422O15Rik|AI316869|BB233631|C030034J04Rik|C77662|P2P-R|PACT
chr8	107096121	107096547	MACS_peak_154733	629.45	426	ENSMUST00000116425	Terf2	629.45	10.08	20.66	21750	TRF2
chr7	64388728	64390131	MACS_peak_163943	628.11	1403	uc029wgh.1	Mphosph10	628.11	9.84	15.24	67973	2810453H10Rik|5730405D16Rik|AI326008
chr8	23190715	23191692	MACS_peak_173540	627.05	977	NM_018743	Agpat6	627.05	11.66	15.31	NA	NA
chr2	118689733	118690390	MACS_peak_79987	623.23	657	NM_001033254	Pak6	623.23	4.99	19.53	214230	4732456M09
chr2	97467656	97468420	MACS_peak_88904	623.08	764	NM_178725	Lrrc4c	623.08	17.39	20.91	241568	6430556C10Rik|NGL-1
chr6	41605481	41605820	MACS_peak_151174	621.87	339	NM_007680	Ephb6	621.87	9.48	15.36	13848	Cekl|Mep
chr5	110379268	110379593	MACS_peak_108687	621.76	325	NM_028596	Fbrsl1	621.76	11.34	19.51	381668	2410025L10Rik|AI467568|Gm1049|Gm29766|mKIAA1545
chr8	72460482	72461355	MACS_peak_152512	620.2	873	NM_138585	Cherp	620.2	7.81	20.9	27967	5730408I11Rik|D8Wsu96e|DAN16|Scaf6
chr3	144569733	144570216	MACS_peak_120022	618.74	483	NM_011828	Hs2st1	618.74	10.49	15.44	23908	AW214369|Hs2st|mKIAA0448
chrX	94636248	94637784	MACS_peak_196179	617.86	1536	NM_008179	Gspt2	617.86	11.02	15.46	14853	-
chr10	17947508	17948067	MACS_peak_10952	617.53	559	NM_001033432	Heca	617.53	13.87	19.51	380629	Gm869|HDC|HDCL
chr14	54686170	54687120	MACS_peak_56474	616.64	950	NM_021437	1700123O20Rik	616.64	13.02	15.49	58248	MNCb-2990
chr11	24163145	24165848	MACS_peak_18788	614.94	2703	NM_001242934	Bcl11a	614.94	12.05	19.66	14025	2810047E18Rik|BCL-11A|Ctip1|D930021L15Rik|Evi9|Evi9a|Evi9b|Evi9c|mKIAA1809
chr18	60918173	60918561	MACS_peak_88617	613.69	388	ENSMUST00000040359	Arsi	613.69	32.92	15.47	545260	BC020108
chr3	55466572	55467235	MACS_peak_114380	613.64	663	NM_001111053	Dclk1	613.64	8.99	15.49	13175	1700113D08Rik|2810480F11Rik|AI836758|Click-I|Cpg16|Dcamkl1|Dcl|Dclk|mKIAA0369
chr2	49451485	49451958	MACS_peak_76473	613	473	NM_172663	Epc2	613	14.94	19.73	227867	5830499L14|D2Ertd694e
chr6	83402666	83404824	MACS_peak_132001	612.91	2158	NM_183138	Tet3	612.91	5.21	21.05	194388	B430006D22Rik|BC037432|D230004J03Rik
chr10	117733677	117734174	MACS_peak_22299	612.22	497	NM_029875	Slc35e3	612.22	15.78	15.54	215436	9330166G04Rik|AI481200
chr8	90956382	90956714	MACS_peak_178448	610.71	332	NM_177224	Chd9	610.71	7.25	15.6	109151	1810014J18Rik|9030205D12Rik|A330063D19Rik|AD013|PRIC320|mKIAA0308
chr19	6363689	6364118	MACS_peak_69894	609.26	429	NM_011750	Sf1	609.26	9.77	19.72	22668	BBP|MZFM|WBP4|Zfp162
chr1	131827976	131828393	MACS_peak_7155	608.52	417	ENSMUST00000086559	Slc41a1	608.52	12.28	21.18	98396	AI573938|B230315F01Rik
chr1	169974246	169975388	MACS_peak_11277	607.71	1142	NM_022563	Ddr2	607.71	19.43	15.76	18214	AW495251|Ntrkr3|tyro10
chr9	13827715	13828061	MACS_peak_157729	606.93	346	ENSMUST00000059579	Fam76b	606.93	10.94	21.11	72826	2810485I05Rik|C78303
chr10	18523790	18527042	MACS_peak_11013	606.02	3252	NM_173390	Nhsl1	606.02	6.59	19.82	215819	5730409E15Rik|A630035H13Rik|A730096F01|BC013565|D10Bwg0940e|mKIAA1357
chr4	41657497	41658152	MACS_peak_93738	603.73	655	NM_016673	Cntfr	603.73	8.77	19.9	12804	Cntfralpha
chr11	82764344	82765626	MACS_peak_30605	602.31	1282	NM_025884	Zfp830	602.31	10.68	15.9	66983	2410003C20Rik|AV301118|AW048207|Ccdc16|Omcg1|Znf830
chr4	156246965	156247413	MACS_peak_134311	602.12	448	NM_001110516	Samd11	602.12	5.05	15.89	231004	BC026991|mr-s
chr19	44407385	44407709	MACS_peak_72056	601.63	324	NM_009127	Scd1	601.63	6.13	19.94	20249	AA589638|AI265570|Scd|Scd-1|ab
chr15	98803781	98807200	MACS_peak_68064	600.96	3419	NM_001013741	Ddn	600.96	7.72	15.87	13199	Gm748
chr5	93205913	93206495	MACS_peak_121236	600.36	582	NM_017367	Ccni	600.36	7.24	21.39	12453	-
chr16	21222744	21223298	MACS_peak_70915	600.33	554	NM_010143	Ephb3	600.33	25.76	15.85	13845	AW456895|Cek10|Etk2|HEK2|MDK5|Sek4|Tyro6
chrX	153139957	153140575	MACS_peak_198216	600.08	618	NM_001004154	Rragb	600.08	8.43	15.84	245670	-
chr11	98756922	98757527	MACS_peak_24572	599.94	605	uc007lhd.1	Thra	599.94	14.52	19.89	21833	6430529J03Rik|AW259572|Erba|Nr1a1|Rvr|T3R[a]|T3Ralpha|Thra1|Thra2|c-erbA-1|c-erbA-alpha|c-erbAalpha
chrX	95165599	95166539	MACS_peak_149921	599.29	940	NM_001290385	Arhgef9	599.29	15.6	19.88	236915	9630036L12Rik
chr2	28192991	28193462	MACS_peak_84295	599.12	471	ENSMUST00000113920	Olfm1	599.12	4.56	21.5	56177	AMY|AW742568|Noe1|OlfA|Pancortin|Pancortin3
chr16	18876749	18877519	MACS_peak_60917	598.6	770	NM_010435	Hira	598.6	15.22	21.51	15260	AA138857|D16Ertd95e|Gm15797|N28177|OTTMUSG00000026264|Tuple1
chr2	55596610	55597980	MACS_peak_100555	598.33	1370	NM_008426	Kcnj3	598.33	16.5	15.84	16519	GIRK-1|GIRK1|Kcnf3|Kir3.1
chr16	58670207	58670950	MACS_peak_74104	597.48	743	NM_007757	Cpox	597.48	15.19	15.83	12892	CPX|Cpo|HCP|cac|nct
chr2	144373190	144373835	MACS_peak_107392	595.27	645	NM_181417	Csrp2bp	595.27	11.7	15.91	228714	2510008M08Rik|ATAC2|AU023459|D2Ertd473e|D2Wsu131e|E430020F17
chr6	145815052	145815942	MACS_peak_158970	593.54	890	NM_027760	Rassf8	593.54	9.9	16.02	71323	5133400D11Rik|AA815821|AW123240|Hoj1|mHoj-1
chr14	20721170	20721659	MACS_peak_40896	591.36	489	NM_027996	Zswim8	591.36	5.72	20.2	268721	2310021P13Rik|4832404P21Rik|Kiaa0913|mKIAA0913
chr10	128488895	128490174	MACS_peak_20024	590.21	1279	NM_198160	Smarcc2	590.21	7.02	21.52	68094	5930405J04Rik
chr6	38603276	38603848	MACS_peak_129698	589.11	572	NM_001170849	Luc7l2	589.11	6.45	21.51	192196	4930471C18Rik|AA522013|AU015269|CGI59|Cgi74
chr11	119143042	119147816	MACS_peak_26844	587.66	4774	NM_172443	Tbc1d16	587.66	6.12	20.28	207592	B930087K01|BC026530|Tcd1d16
chr1	56871311	56871784	MACS_peak_3017	587.38	473	NM_139146	Satb2	587.38	5.52	21.42	212712	mKIAA1034
chr4	28813130	28813480	MACS_peak_122525	587.37	350	NM_010141	Epha7	587.37	21.18	16.2	13841	Cek11|Ebk|Ehk3|Hek11|Mdk1
chr7	141327278	141327725	MACS_peak_147163	586.55	447	NM_016874	Deaf1	586.55	9.41	21.41	54006	AU042387|C230009B13Rik|NUDR
chr9	37384508	37386572	MACS_peak_141595	585.44	2064	ENSMUST00000051839	Hepacam	585.44	8.86	20.48	72927	2900042E01Rik|Glialcam|Hepn1
chr4	48051245	48052201	MACS_peak_106650	584.58	956	uc008suu.1	Nr4a3	584.58	8.37	21.59	18124	AI573420|CHN|CSMF|MINOR|NOR-1|Nor1|TEC
chr3	88424727	88425141	MACS_peak_99703	584.29	414	NM_178696	Slc25a44	584.29	9.51	21.6	229517	6720482A19|B430110G05Rik
chr4	44931035	44931569	MACS_peak_124014	583.97	534	NM_138590	Zcchc7	583.97	7.65	16.17	319885	4930572I07Rik|D4Wsu132e
chr5	88886817	88887324	MACS_peak_120911	583.01	507	ENSMUST00000148750	Slc4a4	583.01	7.19	21.58	54403	AI835705|NBC|NBC1
chr8	70585553	70586028	MACS_peak_152236	581.83	475	NM_007924	Ell	581.83	11.82	21.67	13716	Ell1|Men
chr11	100850398	100850724	MACS_peak_27957	581.69	326	ENSMUST00000004143	Stat5b	581.69	26.06	21.69	20851	-
chr7	27657851	27658532	MACS_peak_138324	581.5	681	NM_001290528	Map3k10	581.5	6.75	21.72	269881	BC028668|BC046514|MST|Mlk2
chr11	69801432	69801857	MACS_peak_28809	580.72	425	ENSMUST00000102585	Fgf11	580.72	7.72	16.26	14166	Fgf-11|Fhf-3|Fhf3
chr15	44427661	44428307	MACS_peak_63433	580.18	646	NM_026149	Nudcd1	580.18	17.43	16.31	67429	4921532K09Rik|AA407246|AW260430|AW556235|CML66-L|Cml66
chr7	44816087	44816483	MACS_peak_139426	578.69	396	ENSMUST00000057195	Nup62	578.69	16.82	21.81	18226	D7Ertd649e|Nupc1|p62
chr12	34373257	34374138	MACS_peak_37550	576.5	881	NM_024124	Hdac9	576.5	11.11	16.29	79221	AV022454|D030072B18Rik|HD7B|HD9|HDRP|Hdac7b|Mitr|mKIAA0744
chr3	96727610	96727910	MACS_peak_100486	576.05	300	NM_026406	Rnf115	576.05	15.52	21.86	67845	2610028E05Rik|AU042696|Zfp364
chr10	7955800	7956230	MACS_peak_13812	575.96	430	ENSMUST00000146444	Tab2	575.96	18.24	16.27	68652	1110030N06Rik|A530078N03Rik|Map3k7ip2|mKIAA0733
chr7	141949750	141950179	MACS_peak_147238	574.04	429	NM_029426	Brsk2	574.04	16.52	21.98	75770	4833424K13Rik|SAD-A|SADA
chr2	164507274	164508221	MACS_peak_109603	571.24	947	NM_133779	Pigt	571.24	8.22	16.46	78928	2510012P17Rik|4930534E15Rik|CGI-06|NDAP|Ndap7
chr1	127397506	127397832	MACS_peak_8155	570.93	326	uc007ckq.1	Mgat5	570.93	8.7	16.46	107895	4930471A21Rik|5330407H02Rik|AI480971|GlcNAc-TV
chr4	149715821	149717269	MACS_peak_101572	569.29	1448	ENSMUST00000054459	Tmem201	569.29	11.11	21.07	230917	AV028368|D4Ertd429e|Net5|Samp1
chr12	110666562	110666945	MACS_peak_43529	569.23	383	ENSMUST00000018851	Dync1h1	569.23	9.85	16.44	13424	9930018I23Rik|AI894280|DHC1|DHC1a|DNCL|Dnchc1|Dnec1|Dnecl|Loa|MAP1C|P22|Swl|mKIAA0325
chr6	122323007	122323813	MACS_peak_120264	569.1	806	NM_007905	Phc1	569.1	6.09	21.06	13619	AW557034|Edr|Edr1|Mph1|Rae-28|rae28
chr2	28582824	28583218	MACS_peak_98086	566.28	394	NM_148928	Gtf3c5	566.28	11.32	16.46	70239	2700084A09Rik|TFIIIC63|TFiiiC2-63
chr18	35858392	35858773	MACS_peak_74564	566.25	381	NM_133687	Cxxc5	566.25	15.5	22.22	67393	4930415K17Rik
chr9	45394982	45396159	MACS_peak_186084	565.23	1177	NM_022004	Fxyd6	565.23	5.64	16.44	59095	0610030I18Rik|Php
chr2	145167753	145168197	MACS_peak_92177	565.17	444	ENSMUST00000110007	Slc24a3	565.17	12.19	22.21	94249	NCKX3
chr3	90254168	90254558	MACS_peak_100007	564.68	390	ENSMUST00000029545	Crtc2	564.68	19.58	22.18	74343	4632407F12Rik|Torc2|mTORC2
chr18	76136826	76137704	MACS_peak_90284	564.5	878	NM_145356	Zbtb7c	564.5	16.14	16.46	207259	B230208J24Rik|Kr-pok|Zbtb36
chr1	34200869	34201415	MACS_peak_2084	564.07	546	NM_133833	Dst	564.07	4.73	16.43	13518	2310001O04Rik|A830042E19Rik|AW554249|BP230|BPAG1-n|Bpag|Bpag1|Macf2|ah|athetoid|dt|mKIAA0728|nmf203|nmf339
chr17	78651740	78652623	MACS_peak_83137	562.64	883	ENSMUST00000145910	Strn	562.64	21.34	16.41	268980	AU022939|D130055P19
chr7	127489688	127491513	MACS_peak_146169	562.48	1825	NM_010183	Fbrs	562.48	10.71	22.27	14123	Fbs|Fbs1
chr18	46525617	46525971	MACS_peak_87828	562.13	354	NM_173423	Fem1c	562.13	15.13	16.38	240263	2610312A07Rik|3632443A22Rik|AI646567
chr2	163995502	163995871	MACS_peak_83725	559.09	369	ENSMUST00000131288	Ywhab	559.09	6.94	21.38	54401	1300003C17Rik
chr6	135209032	135209431	MACS_peak_135959	557.84	399	NM_028982	8430419L09Rik	557.84	8.89	22.4	NA	NA
chr2	20848232	20850385	MACS_peak_97367	557.39	2153	NM_001081364	Arhgap21	557.39	6.48	16.48	71435	5530401C11Rik|AA416458|ARHGAP10
chr13	46501847	46502211	MACS_peak_47266	556.76	364	ENSMUST00000021802	Cap2	556.76	17.88	16.49	67252	2810452G09Rik|AV045235
chr19	29805281	29806009	MACS_peak_80192	556.65	728	NM_172836	9930021J03Rik	556.65	7.77	22.38	240613	ENSMUSG00000048936|Gm9832|mKIAA2026
chr11	120560364	120561260	MACS_peak_35049	556.29	896	NM_011032	P4hb	556.29	7.8	16.48	18453	ERp59|PDI|Pdia1|Thbp
chr18	79086550	79087180	MACS_peak_90600	554.71	630	NM_053099	Setbp1	554.71	6.31	16.6	240427	C130092E12|Seb|mKIAA0437
chr6	82091793	82092226	MACS_peak_131903	553.46	433	NM_145570	Eva1a	553.46	17.95	22.37	232146	BC014699|Fam176a|Tmem166
chr14	24157734	24158754	MACS_peak_41198	552.71	1020	NM_027726	Dlg5	552.71	5.49	21.41	71228	4933429D20Rik|T25557|mKIAA0583
chr7	4715332	4715997	MACS_peak_137098	552.43	665	NM_001003920	Brsk1	552.43	9.22	22.39	381979	Gm1100|SAD-B|SADB
chr12	24994811	24995156	MACS_peak_32012	552.41	345	uc007nez.1	Kidins220	552.41	6.25	22.38	77480	3110039L19Rik|AI194387|AI316525|C330002I19Rik|mKIAA1250
chr17	35262750	35263186	MACS_peak_61339	551.76	436	ENSMUST00000172785	H2-D1	551.76	6.36	21.43	14964	H-2D|H2-D
chr1	36068399	36069184	MACS_peak_1419	550.85	785	NM_015818	Hs6st1	550.85	7.32	21.4	50785	6Ost1
chr7	81893638	81893945	MACS_peak_165450	550.6	307	uc009ics.1	Hdgfrp3	550.6	6.54	16.72	29877	2700022B06Rik|HRP-3
chr8	108947254	108950378	MACS_peak_154819	550.52	3124	NM_007496	Zfhx3	550.52	13.5	22.46	11906	A230102L03Rik|Atbf1|Sci|WBP9|mKIAA4228
chr18	72350355	72351069	MACS_peak_89837	549.96	714	NM_007831	Dcc	549.96	7.55	16.75	13176	C030036D22Rik|Igdcc1
chr8	95825353	95825956	MACS_peak_178977	548.79	603	ENSMUST00000074053	Gm10094	548.79	9.06	16.73	NA	NA
chr4	44012537	44013008	MACS_peak_123904	548.28	471	uc008srh.1	Clta	548.28	3.95	16.74	12757	AV026556|Lca
chr12	111803748	111804386	MACS_peak_43743	547.94	638	NM_028875	Xrcc3	547.94	20.34	16.73	74335	-
chr13	20591953	20592294	MACS_peak_45606	547.07	341	uc007ppq.2	Elmo1	547.07	11.87	16.72	140580	6330578D22Rik|C230095H21Rik|CED-12
chr7	36768627	36771446	MACS_peak_139065	542.22	2819	NM_172298	Tshz3	542.22	6.56	22.79	243931	A630038G13Rik|Tsh3|Zfp537|mKIAA1474|teashirt3
chr8	4200867	4201728	MACS_peak_171564	541.76	861	uc009ktc.1	Evi5l	541.76	16.39	16.75	213027	1700084G18Rik|2310039H16Rik|3110007G05Rik|B130050I23Rik
chr9	98992512	98992940	MACS_peak_190624	540.56	428	uc009rds.1	Faim	540.56	6.41	16.79	23873	-
chr19	47050450	47050845	MACS_peak_94784	540.05	395	NM_027654	Pcgf6	540.05	14.8	16.8	71041	4933407A11Rik|AI604840|MBLR|Rnf134
chr6	97617189	97617657	MACS_peak_155324	539.88	468	NM_145148	Frmd4b	539.88	12.6	16.81	232288	6030440G05Rik|C87375|GOBLIN|GRSP1|R74720|mKIAA1013
chr13	93303756	93305302	MACS_peak_50289	538.41	1546	ENSMUST00000109494	Homer1	538.41	10.09	16.91	26556	PSD-Zip45|SYN47|Ves-1|homer-1|vesl-1
chr18	57878677	57879544	MACS_peak_76028	537.84	867	NM_009194	Slc12a2	537.84	12.52	22.88	20496	9330166H04Rik|Nkcc1|mBSC2|sy-ns
chr4	43039965	43040301	MACS_peak_123773	537.4	336	NM_001253353	Fam214b	537.4	10.3	16.96	230088	B230312A22Rik
chr8	111033841	111034263	MACS_peak_137547	536.44	422	NM_146217	Aars	536.44	7.22	21.85	234734	AI316495|C76919|sti
chr4	134853037	134853345	MACS_peak_131583	536.16	308	NM_025382	Tmem57	536.16	14.15	16.95	66146	1110007C24Rik|9230118A01Rik|AI317300|AI606104|C61
chr8	31159682	31160577	MACS_peak_149998	535.91	895	NM_026453	Mak16	535.91	10.06	22.88	67920	2600016B03Rik|AI314911|Rbm13
chr8	26978567	26980342	MACS_peak_149841	533.89	1775	NM_001101502	Zfp703	533.89	10.81	22.91	353310	1110032O19Rik|AI430822|AL022941|Csmn1|End2|Zeppo1|Znf703|Zpo1
chr4	135324818	135325280	MACS_peak_112813	533.63	462	NM_016799	Srrm1	533.63	9.24	22.89	51796	AA407769|POP101|Srm160
chr18	36560602	36561055	MACS_peak_86736	533.36	453	NM_175375	Ankhd1	533.36	14.32	17.04	108857	1110004O12Rik|4933432B13Rik|9130019P20Rik|A530027J04Rik|A630021B20Rik|AA571404|Mask|mFLJ00246|mKIAA1085
chr7	16158803	16160511	MACS_peak_137481	533.35	1708	NM_148946	Slc8a2	533.35	6.23	22.88	110891	Ncx2
chr6	136587044	136587683	MACS_peak_120986	531.6	639	NM_019426	Atf7ip	531.6	4.68	21.91	54343	2610204M12Rik|AM|Mcaf1
chr2	91982454	91983007	MACS_peak_103087	531.5	553	NM_011957	Creb3l1	531.5	11.15	17.01	26427	Oasis
chr7	111779312	111779977	MACS_peak_144715	531.13	665	NM_173739	Galnt18	531.13	14.45	22.89	233733	2900011G21Rik|BC024988|Galntl4
chr10	29143305	29144194	MACS_peak_11505	530.9	889	ENSMUST00000070359	Gm9996	530.9	7.22	21.98	791368	ENSMUSG00000056316
chr7	16429530	16429910	MACS_peak_137544	529.82	380	NM_198631	Zc3h4	529.82	6.52	22.87	330474	Bwq1|Gm768|Kiaa1064-hp|mKIAA1064
chr9	45126104	45127340	MACS_peak_142200	529.6	1236	NM_001014761	Scn2b	529.6	9.01	21.91	72821	2810451E09Rik|AI840361|Gm183
chr15	96582855	96583573	MACS_peak_58209	528.83	718	uc007xkk.2	Slc38a1	528.83	20.27	22.84	105727	AA408026|AA409865|AL022800|AU015942|NAT2
chr17	91236786	91237535	MACS_peak_84396	527.95	749	ENSMUST00000057074	Gm6741	527.95	24.54	17.03	627235	EG627235
chr6	146997970	146998281	MACS_peak_159101	527.23	311	uc009esp.1	Ppfibp1	527.23	13.59	17.07	67533	4632409B19Rik|AW214454|AW261454
chr4	129729734	129730325	MACS_peak_99478	527.05	591	uc008uye.2	Khdrbs1	527.05	6.15	22.13	20218	Sam68|p62|p68
chr10	17723937	17725244	MACS_peak_10934	526.53	1307	NM_010828	Cited2	526.53	10.02	22.1	17684	AI835299|ER154-like|Mrg1|Msg2|p35srj
chr11	115603924	115604243	MACS_peak_29535	526.07	319	ENSMUST00000058109	Mrps7	526.07	8.76	22.92	50529	MRP-S7|Rpms7
chr2	152081528	152082182	MACS_peak_107972	524.09	654	NM_001160410	Scrt2	524.09	30.66	17.06	545474	AW060659
chr11	46311934	46312358	MACS_peak_26439	522.75	424	NM_001252460	Cyfip2	522.75	9.93	17.13	76884	1500004I01Rik|6430511D02Rik|AA930218|AU022376|Pir121|mKIAA1168
chr8	22974875	22975261	MACS_peak_149555	521.14	386	NM_001110783	Ank1	521.14	16.5	22.97	11733	Ank-1|nb|pale
chr11	118354960	118355506	MACS_peak_29996	521.02	546	ENSMUST00000017610	Timp2	521.02	5.21	22.95	21858	D11Bwg1104e|Timp-2
chr10	93641048	93641508	MACS_peak_20855	520.01	460	NM_021320	Ntn4	520.01	16.95	17.16	57764	-
chr6	113842131	113842645	MACS_peak_156354	519.86	514	NM_009723	Atp2b2	519.86	7.73	17.16	11941	D6Abb2e|Gena300|PMCA2|Tmy|dfw|jog|wms|wri
chrX	69360479	69360838	MACS_peak_168079	519.62	359	NM_008032	Aff2	519.62	9.63	23.05	14266	FMR2P|Fmr2|Ox19|Oxh
chr4	8854845	8855514	MACS_peak_104277	519.55	669	NM_001277149	Chd7	519.55	10.4	23.04	320790	A730019I05Rik|Cycn|Cyn|Dz|Edy|Flo|GENA 47|GENA 60|Gena 52|Lda|Mt|Obt|Todo|WBE1|Whi|metis
chr19	24875685	24876179	MACS_peak_70828	518.18	494	ENSMUST00000073080	Gm10053	518.18	7.82	22.25	672195	CYCS|ENSMUSG00000058927
chr10	42828890	42830076	MACS_peak_16240	517.76	1186	NM_153055	Sec63	517.76	13.05	17.23	140740	5730478J10Rik|AI649014|AW319215
chr9	106368631	106369323	MACS_peak_164884	516.91	692	NM_153459	Dusp7	516.91	16.33	23.01	235584	AU015694|Mkpx|Pyst2
chr11	42133087	42133790	MACS_peak_26215	516.23	703	NM_010250	Gabra1	516.23	11.63	17.23	14394	Gabra-1
chr14	47310414	47311113	MACS_peak_42808	516.04	699	NM_178684	Mapk1ip1l	516.04	7.46	22.31	218975	9130202B12|C130032J12Rik
chr5	136982193	136982687	MACS_peak_112010	513.1	494	ENSMUST00000034953	Znhit1	513.1	7.21	22.43	70103	2700001K05Rik|ZNFN4A1
chr6	124769248	124769550	MACS_peak_135429	512.3	302	ENSMUST00000149652	Eno2	512.3	18.47	23.06	13807	AI837106|D6Ertd375e|Eno-2|NSE
chr7	27195780	27196107	MACS_peak_160688	512.15	327	NM_001243888	BC024978	512.15	5.45	17.34	414069	-
chr6	88084472	88084794	MACS_peak_117833	511.15	322	NM_133933	Rpn1	511.15	4.09	22.51	103963	AU018702|D6Wsu137e|Rpn-1
chrX	134804588	134807013	MACS_peak_169793	510.88	2425	NM_026139	Armcx2	510.88	16.61	23.02	67416	3230401N03Rik|AI043003|ALEX2
chr15	85577507	85578070	MACS_peak_66788	510.67	563	NM_001163634	Wnt7b	510.67	11.36	17.35	22422	Wnt-7b
chr15	80878866	80881349	MACS_peak_56561	510.16	2483	uc007wvu.2	Tnrc6b	510.16	6.45	23.04	213988	2700090M07Rik|A730065C02Rik|AI848765|D230019K20Rik
chr7	19176420	19176761	MACS_peak_160200	510.03	341	ENSMUST00000117338	Eml2	510.03	13.25	17.38	72205	1600029N02Rik
chr4	128773130	128774637	MACS_peak_99330	509.68	1507	NM_001081098	Zfp362	509.68	5.87	22.43	230761	-
chrX	103821354	103821988	MACS_peak_169297	508.89	634	NM_009197	Slc16a2	508.89	10.42	23.09	20502	AW105741|Mct8|Xpct
chr17	24076474	24076856	MACS_peak_67395	508.86	382	NM_011062	Pdpk1	508.86	10.8	23.08	18607	Pdk1
chr8	104419013	104420682	MACS_peak_179194	507.71	1669	NM_001013380	Dync1li2	507.71	9.37	17.41	234663	AA409702|C920003I06|Dncli2|Dnclic2|LIC2
chr6	48025089	48025818	MACS_peak_151564	507.5	729	NM_001081382	Zfp777	507.5	7.77	17.4	72306	2500002G23Rik
chr5	77308906	77310086	MACS_peak_107081	507.42	1180	NM_019836	Noa1	507.42	8.51	22.58	56412	2610024G14Rik|AU022345|AtNOS1|mAtNOS1
chr3	88894819	88896571	MACS_peak_99780	507.29	1752	NM_027389	Gon4l	507.29	7.62	23.08	76022	1500041I23Rik|2610100B20Rik|3632445O20Rik|5430404N14Rik|AA387005
chr11	120542887	120543748	MACS_peak_35047	507.04	861	NM_001033231	Fam195b	507.04	11.57	17.42	192173	-
chr2	29124991	29125549	MACS_peak_84392	506.98	558	NM_198033	Setx	506.98	11.6	23.07	269254	A130090N03|A930037J23Rik|AOA2|AW060766|Als4|SCAR1|Sen1|mKIAA0625
chr12	80518989	80519345	MACS_peak_40487	506.45	356	NM_001081421	Galnt16	506.45	11.16	17.39	108760	5730405L21Rik|AI415388|Galntl1|mpp-GalNAc-T16
chr18	20673630	20673954	MACS_peak_85278	506.39	324	NM_013697	Ttr	506.39	7	17.41	22139	AA408768|AI787086|D17860|prealbumin
chr4	127233534	127234019	MACS_peak_111765	505.95	485	NM_198618	Dlgap3	505.95	8.13	23.08	242667	BC058433|DAP-3|DAP3|Prpl8|Sapap3
chr19	6227764	6228531	MACS_peak_69856	505.56	767	ENSMUST00000025695	Ppp2r5b	505.56	6.48	22.63	225849	B'beta|BC026670
chr14	30519039	30519677	MACS_peak_47005	505.49	638	NM_133761	Dcp1a	505.49	20.71	23.12	75901	1110066A22Rik|4930568L04Rik|AU019772|D14Ertd817e|Mitc1|SMIF
chr7	126928878	126929298	MACS_peak_146088	505.11	420	NM_172747	Kctd13	505.11	8.29	23.11	233877	1500003N18Rik|AV259508|PDIP1alpha|Pdip1|Poldip1
chr5	112475028	112475586	MACS_peak_122713	504.58	558	NM_019982	Sez6l	504.58	4.61	23.12	56747	AI843918|AIG1|AW539724|Acig1|BSRP-B|mKIAA0927
chr2	155990215	155992774	MACS_peak_108533	503.67	2559	NM_008383	Cep250	503.67	6.16	17.41	16328	AW490617|B230210E21Rik|Cep2|Inmp
chr7	25079534	25082354	MACS_peak_160511	502.25	2820	NM_175477	Zfp574	502.25	8.54	17.41	232976	A630056B21Rik|Znf574
chrX	101254527	101255181	MACS_peak_169083	502.13	654	NM_018789	Foxo4	502.13	16.74	23.2	54601	Afxh|Mllt7|afx
chr7	126760596	126760913	MACS_peak_129721	501.35	317	uc009jsn.1	Mapk3	501.35	10.53	22.79	26417	Erk-1|Erk1|Ert2|Esrk1|Mnk1|Mtap2k|Prkm3|p44|p44erk1|p44mapk
chr7	97685424	97686168	MACS_peak_167009	501.16	744	NM_001081267	Rsf1	501.16	7.62	17.43	233532	4832420A03Rik|C030033M12Rik|Gm164|Hbxap|XAP8|p325
chr8	70352777	70353273	MACS_peak_135009	501.14	496	NM_030680	Upf1	501.14	6.42	22.83	19704	B430202H16Rik|NORF1|PNORF-1|Rent1|Upflp
chr12	113136517	113137190	MACS_peak_43933	500.67	673	NM_054081	Mta1	500.67	9.43	17.42	116870	-
chr18	60984776	60987946	MACS_peak_67572	500.63	3170	NM_009792	Camk2a	500.63	5.85	22.79	12322	CaMKII|R74975|mKIAA0968
chr17	65849753	65850195	MACS_peak_82030	500.46	442	NM_009067	Ralbp1	500.46	6.86	17.43	19765	RLIP76|Rip1
chr7	99979971	99980370	MACS_peak_167317	500.43	399	NM_175388	Rnf169	500.43	9.33	17.43	108937	2900057K09Rik
chr10	80634213	80634641	MACS_peak_19294	500.38	428	NM_134002	Csnk1g2	500.38	6.66	17.43	103236	2810429I12Rik|AI463719
chr15	36608313	36608973	MACS_peak_47786	500.21	660	NM_008774	Pabpc1	500.21	4.61	22.78	18458	PABP|Pabp1|PabpI|Pabpl1|ePAB
chr16	90386396	90386716	MACS_peak_65173	499.65	320	NM_015755	Hunk	499.65	12.06	23.31	26559	Bstk1|Mak-v
chr4	126967815	126968135	MACS_peak_111725	499.49	320	ENSMUST00000106108	Zmym4	499.49	9.83	23.36	67785	6330503C17Rik|AI480785|AW493829|CDIR|D630001M21|MYM|Zfp262|Znf262|mKIAA0425
chr3	53856428	53857995	MACS_peak_114234	498.57	1567	NM_026435	Ufm1	498.57	11.74	17.42	67890	1810045K17Rik|AI132708|AI463323|ENSMUSG00000074598|Gm10726
chr9	67043577	67043962	MACS_peak_188537	498.27	385	ENSMUST00000113690	Tpm1	498.27	6.76	17.44	22003	AA986836|AI854628|TM2|Tm3|Tmpa|Tpm-1|alpha-TM
chr17	63499024	63500580	MACS_peak_70465	496.68	1556	NM_015794	Fbxl17	496.68	7.05	23.38	50758	6330576B01Rik|AI452053|BB073797|C130023C01Rik|Fbx13|Fbxo13
chr6	56797482	56797794	MACS_peak_152242	495.48	312	NM_145958	Kbtbd2	495.48	15.16	17.45	210973	BC022962|Bklhd1|mKIAA1489
chr9	106451983	106452918	MACS_peak_164893	494.42	935	NM_029631	Abhd14b	494.42	22.16	23.6	76491	1810013B01Rik
chr12	112180450	112181734	MACS_peak_43784	493.1	1284	NM_001097621	Kif26a	493.1	28.3	17.47	668303	mKIAA1236
chr4	133338995	133339324	MACS_peak_112590	493.06	329	ENSMUST00000043305	Wdtc1	493.06	17.27	23.62	230796	Gm695|adipose|adp
chr2	166154946	166155285	MACS_peak_94292	492.56	339	NM_001252578	Sulf2	492.56	16.3	23.62	72043	2010004N24Rik|AU020235|MSulf-2|mKIAA1247
chr4	155221551	155222592	MACS_peak_102291	491.64	1041	ENSMUST00000030917	Ski	491.64	5.24	23.22	20481	2310012I02Rik|2610001A11Rik|AA062172|AA589460|BC004088
chr8	105695207	105695568	MACS_peak_137092	490.79	361	NM_001033320	Rltpr	490.79	7.68	23.32	234695	CARMIL2|CG1399-PB|D130029J02Rik|Gm585
chrX	136139854	136140376	MACS_peak_150717	489.24	522	NM_212457	Bex4	489.24	4.64	23.31	406217	-
chr5	24482265	24483184	MACS_peak_103696	488.59	919	NM_001256431	Agap3	488.59	7.14	23.33	213990	AGAP-3|AV028425|Centg3|Crag|Crag.|MRIP-1|cnt-g3
chr5	111417441	111421883	MACS_peak_122587	488.23	4442	ENSMUST00000094463	Mn1	488.23	7.7	23.68	433938	AA003644|AA009236
chr7	132315663	132317575	MACS_peak_146563	487.8	1912	uc012fvc.1	Gm10584	487.8	14.4	23.66	100043682	ENSMUSG00000073814
chr10	69533707	69534284	MACS_peak_13378	486.46	577	NM_146005	Ank3	486.46	5.36	23.26	11735	2900054D09Rik|AI314020|Ank-3|AnkG|Ankyrin-3|Ankyrin-G
chr1	43189120	43189480	MACS_peak_2926	486.17	360	uc007avm.2	Rpl29	486.17	7.19	17.73	19944	Rpl43
chr7	63937966	63938915	MACS_peak_141017	486.06	949	NM_021366	Klf13	486.06	5.64	23.72	50794	0610043C13Rik|9430029L20Rik|Bteb3|FKLF-2|FKLF2|NSLP1|RFLAT-1|RFLAT1
chr2	152847963	152848297	MACS_peak_82494	485.55	334	NM_028109	Tpx2	485.55	22.1	23.26	72119	2610005B21Rik|DIL2|REPP86|p100
chr8	84670478	84673304	MACS_peak_136047	484.46	2826	NM_025788	Nacc1	484.46	5.38	23.26	66830	2010001H03Rik|4930511N13Rik|Btbd14b|Nac1
chr5	72957292	72957652	MACS_peak_120208	484.36	360	NM_153567	Slain2	484.36	10.75	23.86	75991	5033405K12Rik|8030444K12Rik|AI596370
chr13	63533263	63533666	MACS_peak_42081	484.14	403	NM_008957	Ptch1	484.14	11.68	23.91	19206	A230106A15Rik|Ptc|Ptc1|Ptch|mes
chr15	92769495	92770963	MACS_peak_67509	483.9	1468	NM_001164593	Pdzrn4	483.9	8.75	17.79	239618	1110017D07Rik|LNX4|SAMCAP3L|mKIAA3027
chr2	37358879	37359253	MACS_peak_75945	483.14	374	ENSMUST00000112940	Pdcl	483.14	8.4	23.41	67466	1200011E13Rik|AW108059|PhLP1
chr2	121170435	121171149	MACS_peak_90249	482.7	714	uc008lxt.3	Zscan29	482.7	18.53	23.92	99334	AW125441|Zfp690
chr11	69998396	69999132	MACS_peak_28835	482.58	736	NM_030064	Phf23	482.58	5.77	17.86	78246	2022-06-01
chr19	61224543	61225033	MACS_peak_82493	482.55	490	NM_009970	Csf2ra	482.55	8.81	23.9	12982	CD116|Csfgmra|GM-CSF-Ra|GM-CSFR
chr11	120990934	120991333	MACS_peak_30559	482.09	399	NM_027874	Csnk1d	482.09	10.24	23.98	104318	1200006A05Rik|AA409348|D930010H05Rik
chr1	58646607	58647296	MACS_peak_3788	481.44	689	ENSMUST00000081455	Gm10068	481.44	12.79	17.98	NA	NA
chr2	35719852	35720741	MACS_peak_99253	481.31	889	NM_001001602	Dab2ip	481.31	10.05	17.97	69601	2310011D08Rik|AI480459|Aip1|mKIAA1743
chr7	19561810	19562398	MACS_peak_160292	480.69	588	NM_199149	Ppp1r37	480.69	10.09	17.99	232947	Gm158|Lrrc68
chr11	85311243	85311923	MACS_peak_26629	480.57	680	ENSMUST00000020835	Ppm1d	480.57	15.82	24.05	53892	AV338790|Wip1
chr9	21766870	21767767	MACS_peak_158289	478.69	897	NM_145611	Kank2	478.69	30.77	24.07	235041	AI504612|Ankrd25|BC010245
chr17	86963131	86963747	MACS_peak_64210	477.66	616	NM_145491	Rhoq	477.66	10.54	23.6	104215	Arhq|TC10A|Tc10
chr7	27364070	27364690	MACS_peak_138239	477.49	620	NM_032610	Sptbn4	477.49	11.36	24.1	80297	1700022P15Rik|5830426A08Rik|ROSA62|SpbIV|Spnb4|dyn|lnd|nmf261|nmf379|qv
chr5	115011142	115011615	MACS_peak_123117	476.86	473	ENSMUST00000031530	Sppl3	476.86	8.22	24.08	74585	4833416I09Rik|Psl4|Usmg3
chr17	27753229	27753995	MACS_peak_79204	476.03	766	NM_001033279	D17Wsu92e	476.03	6.98	18.07	224647	AU020189|C030010A15|C80239
chr15	99972718	99973287	MACS_peak_68225	475.44	569	uc011zzi.1	2310068J16Rik	475.44	13.23	18.09	70281	-
chr3	105004233	105006128	MACS_peak_117834	475.17	1895	NM_030249	Cttnbp2nl	475.17	7.82	18.08	80281	AA552995|AA589392|AU018624|BC003236|mKIAA1433
chr7	143286509	143288379	MACS_peak_171180	474.63	1870	uc012fxx.1	Kcnq1ot1	474.63	12.57	18.07	63830	Kvlqt1-as|Lit1|Tssc8
chr4	126743749	126745271	MACS_peak_99012	473.92	1522	NM_011986	Ncdn	473.92	3.48	23.65	26562	AU042419|MMS10-AE|Ms10ae|mKIAA0607|norbin
chr13	81782819	81783325	MACS_peak_49704	472.56	506	uc007ric.1	AK144545	472.56	14.66	18.08	NA	NA
chr11	116147903	116148228	MACS_peak_29643	472.25	325	uc007mkf.1	Fbf1	472.25	6.03	24.06	217335	1110033G01Rik|5930413D20|mKIAA1863
chr4	141723056	141723419	MACS_peak_132535	472.19	363	NM_001017966	Ddi2	472.19	14.39	18.07	68817	1110056G13Rik|1700027M01Rik|9130022E05Rik|AI604911|AU040698
chr4	43442228	43443638	MACS_peak_106186	471.14	1410	ENSMUST00000060864	Tesk1	471.14	13.56	24.1	21754	AI326901
chr6	86956258	86956572	MACS_peak_132453	470.52	314	NM_177762	Aak1	470.52	4.96	24.15	269774	5530400K14Rik|9630042K20|AU067724|AU067726|BC028270|C79663|D6Ertd245e|R75501|mKIAA1048
chr5	142401496	142402041	MACS_peak_126651	469.97	545	NM_199068	Foxk1	469.97	14.2	24.1	17425	A630048H08Rik|AI463295|ENSMUSG00000075577|Gm10868|Mnf
chr1	182446273	182446736	MACS_peak_12542	469.6	463	NM_173378	Trp53bp2	469.6	11.5	18.12	209456	53BP2|AI746547|ASPP2|PPP1R13A|Tp53bp2|X98550
chr5	122443803	122444462	MACS_peak_144336	469.54	659	NM_019805	Anapc7	469.54	8.88	18.12	56317	APC7|AW545589
chr8	70597490	70598120	MACS_peak_135073	467.6	630	uc009may.1	Ssbp4	467.6	10.06	23.95	76900	1210002E11Rik|AW743380|Sspb4
chr14	64590272	64593961	MACS_peak_57415	467.26	3689	uc007uil.1	A930011O12Rik	467.26	7.36	18.16	NA	NA
chr17	35220174	35220976	MACS_peak_68991	466.62	802	NM_010909	Nfkbil1	466.62	12.36	24.23	18038	Def-7|IKBL
chr13	66996967	66997402	MACS_peak_48901	466.06	435	NM_008959	Ptdss1	466.06	6.97	18.17	19210	AU044268|AW539008|PSS-1|mKIAA0024
chr8	34807296	34808173	MACS_peak_133368	465.36	877	ENSMUST00000033930	Dusp4	465.36	20.5	24.02	319520	2700078F24Rik|AI844617|BB104621|E130306H24Rik|MKP2
chr16	72742125	72742958	MACS_peak_74839	465.32	833	uc007zqz.1	Robo1	465.32	6.72	18.14	19876	AW494633|AW742721|DUTT1|Gm310
chr5	52368158	52369262	MACS_peak_119221	464.83	1104	NM_011435	Sod3	464.83	18.4	24.27	20657	AI314465|EC-SOD
chrX	160833867	160834834	MACS_peak_151580	464.63	967	NM_001024624	Cdkl5	464.63	4.27	24.07	382253	BC038161|Stk9
chr6	4600855	4601301	MACS_peak_113395	463.93	446	ENSMUST00000015333	Casd1	463.93	10.78	24.04	213819	Cas1|Cast1
chr7	127342822	127344875	MACS_peak_129797	463.89	2053	NM_146202	Zfp768	463.89	7.81	24.07	233890	BC026432|Znf768
chr16	17673068	17673398	MACS_peak_53985	463.38	330	NM_033609	Med15	463.38	6.74	24.05	94112	A230074L19Rik|AW536074|Pcqap|mPcqap
chr7	101836570	101836951	MACS_peak_144170	462.94	381	NM_010567	Inppl1	462.94	20.51	24.23	16332	51C|SHIP2
chr17	12218984	12219645	MACS_peak_77900	462.67	661	ENSMUST00000024594	Agpat4	462.67	7.87	18.15	68262	1500003P24Rik
chr10	20333253	20333572	MACS_peak_14706	462.38	319	uc007enx.1	Bclaf1	462.38	5.58	18.14	72567	2610102K23Rik|2700025J07Rik|2810454G14Rik|5730534O06Rik|AI450190|AW556225|Btf|mKIAA0164
chr15	76062669	76063047	MACS_peak_65360	462.08	378	NM_134089	Scrib	462.08	9.44	18.12	105782	AI118201|CRIB|Crc|SCRIB1|Scrb1|mKIAA0147|vartul
chr15	22713819	22714876	MACS_peak_47087	461.87	1057	NM_001165971	Gm5803	461.87	9.87	24.06	545091	EG545091
chr12	72761210	72761631	MACS_peak_34386	461.03	421	NM_008910	Ppm1a	461.03	8.89	24.35	19042	2310003C21Rik|2900017D14Rik|AI427932|AU017636|MMPa-2|MPPa-1
chr11	94629766	94630109	MACS_peak_24171	460.63	343	ENSMUST00000021239	Lrrc59	460.63	7.39	24.14	98238	AA959742|C78668
chr6	113492686	113493338	MACS_peak_156286	460.49	652	NM_133930	Creld1	460.49	8.55	18.14	171508	AI843811
chr4	120286838	120287349	MACS_peak_129633	460.45	511	ENSMUST00000102656	Foxo6	460.45	12.05	18.16	329934	-
chr6	124860818	124862122	MACS_peak_135445	460.28	1304	NM_013533	Gpr162	460.28	7.89	24.37	14788	A-2|BC031437|Grca
chr7	144409461	144411868	MACS_peak_147506	459.72	2407	NM_001081370	Shank2	459.72	4.96	24.47	210274	ProSAP1|mKIAA1022
chr1	186704428	186704789	MACS_peak_12784	459.57	361	NM_009367	Tgfb2	459.57	23.93	18.2	21808	BB105277|Tgf-beta2|Tgfb-2
chr5	118187180	118188373	MACS_peak_123598	459.51	1193	NM_007545	Hrk	459.51	14.42	24.45	12123	AI838259|Bid3|DP5|harakiri
chr1	158362303	158362865	MACS_peak_8691	458.96	562	NM_007495	Astn1	458.96	6.73	24.44	11899	Astn|GC14|mKIAA0289
chr9	80066902	80067572	MACS_peak_145011	458.57	670	NM_146003	Senp6	458.57	7.27	24.09	215351	2810017C20Rik|E130319N12Rik|Susp1|mKIAA0797
chr17	35979126	35980236	MACS_peak_69068	457.5	1110	ENSMUST00000055454	Prr3	457.5	5.9	24.39	75210	4930540G07Rik|Cat56
chr5	37289097	37289530	MACS_peak_105189	457.49	433	ENSMUST00000114154	Evc	457.49	6.47	24.08	59056	-
chr2	31572650	31572953	MACS_peak_84803	457.39	303	NM_001033389	Fubp3	457.39	13.88	24.37	320267	A330051M14Rik|AV006371|FBP3|Marta2
chr11	69343272	69344478	MACS_peak_24704	457.3	1206	NM_146019	Chd3	457.3	3.55	24.37	216848	2600010P09Rik|AF020312|Chd7|Prp7|Prp9-1
chr3	88502752	88503386	MACS_peak_88470	456.08	634	ENSMUST00000149068	Lmna	456.08	5.84	24.13	16905	Dhe
chr10	59104171	59104879	MACS_peak_12799	455.86	708	uc007fdl.1	Sh3rf3	455.86	11.59	24.12	237353	4831416G18Rik|Igfbp5-ip|Sh3md4|Sh3rf31
chrX	41401300	41401655	MACS_peak_194356	455.78	355	NM_016886	Gria3	455.78	17.35	18.28	53623	2900064I19Rik|GluA3|GluR-C|GluR-K3|Glur-3|Glur3|Gluralpha3
chr11	102994046	102995172	MACS_peak_32553	455.64	1126	ENSMUST00000021313	Dcakd	455.64	6.75	18.27	68087	3010024O21Rik|6720485C15Rik|AI849483
chr10	80153815	80154133	MACS_peak_19220	455.08	318	NM_021565	Midn	455.08	6.91	18.25	59090	3000003C15Rik
chr12	84417286	84418205	MACS_peak_41222	454.99	919	NM_025525	Rnf113a2	454.99	8.21	18.25	66381	2310020H19Rik|AI426758|Rnf113a
chr5	25313979	25315875	MACS_peak_103791	454.73	1896	NM_001081383	Kmt2c	454.73	6.17	24.09	231051	E330008K23Rik|HALR|Mll3|mKIAA1506
chr9	98424709	98425051	MACS_peak_190609	453.31	342	NM_011254	Rbp1	453.31	6.38	18.3	19659	CRBPI|Crbp|Rbp-1
chr2	122368646	122369162	MACS_peak_90460	452.75	516	ENSMUST00000125826	Shf	452.75	15.6	24.53	435684	-
chr17	47323277	47323662	MACS_peak_80888	452.7	385	NM_172622	Trerf1	452.7	14.9	18.29	224829	9430096I18Rik|AI429294|B830015H24|RAPA|Trep-132|Trep132
chr13	23421470	23422335	MACS_peak_39510	451.86	865	NM_013924	Abt1	451.86	22.55	24.48	30946	-
chr8	36216063	36217416	MACS_peak_174476	450.65	1353	NM_001081150	Lonrf1	450.65	14.64	18.34	244421	-
chr5	31543593	31543913	MACS_peak_136851	448.93	320	uc008wyr.2	Slc4a1ap	448.93	8.38	18.42	20534	kanadaptin
chr13	37946856	37947663	MACS_peak_46556	446.26	807	NM_001177869	Rreb1	446.26	7.73	18.42	68750	1110037N09Rik|AA414966|B930013M22Rik
chr12	109032181	109034351	MACS_peak_33374	446.24	2170	NM_001163175	Begain	446.24	7	24.42	380785	BM948371|Gm897
chr12	67220969	67222549	MACS_peak_34021	443.66	1580	NM_207010	Mdga2	443.66	9.27	24.68	320772	6720489L24Rik|9330209L04Rik|Adp|Mamdc1
chr16	32246493	32247158	MACS_peak_71711	443.2	665	ENSMUST00000042732	Fbxo45	443.2	9.9	18.47	268882	2610017J04Rik|AI463119|BC026799
chr11	51743346	51744000	MACS_peak_23135	442.72	654	uc007iuo.1	Sec24a	442.72	8.21	24.7	77371	-
chr3	25433465	25434460	MACS_peak_112337	442.5	995	NM_138666	Nlgn1	442.5	6.81	18.49	192167	6330415N05Rik|BB179718|NL1|Nlg1|mKIAA1070
chr14	55112954	55114178	MACS_peak_48455	442.19	1224	uc007tyj.2	Jph4	442.19	7.21	24.74	319984	9330157P13Rik|JP-4|JPHL1
chr6	72788709	72789243	MACS_peak_131537	442.05	534	ENSMUST00000069536	Tcf7l1	442.05	16.32	24.73	21415	Tcf-3|Tcf3|bHLHb21
chr11	98149315	98149616	MACS_peak_27714	441.5	301	NM_028149	Fbxl20	441.5	30.68	24.7	72194	2610511F20Rik|4632423N09Rik|AI849362|AL117906|C86145|Fbl2|Scr|mKIAA4147
chr17	80406491	80406958	MACS_peak_63705	440.96	467	uc008drh.1	Sos1	440.96	5.09	24.67	20662	4430401P03Rik|9630010N06|AI449023
chr12	80259986	80260371	MACS_peak_40444	440.25	385	NM_134156	Actn1	440.25	10.3	18.5	109711	3110023F10Rik|Actn1a
chr15	44752086	44752458	MACS_peak_63465	439.33	372	NM_178765	Sybu	439.33	9.64	18.51	319613	Golsyn
chr10	86731828	86732409	MACS_peak_17304	439.31	581	ENSMUST00000070435	Fabp3-ps1	439.31	24.82	24.86	14074	Fabph-3|Fabph-ps1|Fabph3
chr10	52690500	52691169	MACS_peak_12457	438.52	669	NM_178675	Slc35f1	438.52	10.45	24.69	215085	Duf6|E130016L02
chr1	156035757	156036480	MACS_peak_7490	438.44	723	NM_144791	Tor1aip1	438.44	5.96	24.68	208263	LAP1|Lap1B
chr9	70502939	70503378	MACS_peak_188920	438.36	439	uc009qoc.1	Rnf111	438.36	12.86	18.53	93836	ARK|Arkadia
chr17	65613219	65613555	MACS_peak_70555	437.62	336	NM_013933	Vapa	437.62	9.65	24.94	30960	33kDa|VAP33
chr12	72085838	72086183	MACS_peak_34316	436.99	345	NM_024205	Jkamp	436.99	9.91	24.96	104771	1200003C05Rik|2310047L11Rik|Jamp
chr15	83121831	83122149	MACS_peak_56875	436.81	318	ENSMUST00000166019	Rrp7a	436.81	7.84	24.95	74778	1110014J01Rik|AA408146|Kheg1
chr10	81230491	81230833	MACS_peak_19400	436.78	342	ENSMUST00000047408	Atcay	436.78	8.47	18.55	16467	3322401A10Rik|BB077577|BNIP-H|CLAC|hes|ji
chr7	4992851	4995340	MACS_peak_137135	436.62	2489	ENSMUST00000162731	Zfp579	436.62	5.6	24.99	68490	1110003A17Rik|Znf579
chr6	134248273	134248804	MACS_peak_135855	436.28	531	NM_007961	Etv6	436.28	8.54	24.96	14011	AW123102|AW557856|Tel
chr3	101377805	101378492	MACS_peak_89473	435.54	687	NM_207205	Igsf3	435.54	7.6	24.63	78908	1700016K10Rik|2810035F16Rik|4833439O17Rik|mKIAA0466
chr4	105157346	105157963	MACS_peak_97293	435.21	617	NM_080555	Ppap2b	435.21	3.91	24.64	NA	NA
chr8	124894544	124897705	MACS_peak_156654	435.17	3161	NM_198103	Exoc8	435.17	9.16	24.99	102058	AI414418|EXO84|Exo84p|R74783|SEC84
chr15	103313894	103315225	MACS_peak_58936	434.24	1331	NM_013866	Zfp385a	434.24	7.12	25.04	29813	Hzf|Zfp385|Znf385a
chr12	86678699	86680326	MACS_peak_31912	433.99	1627	NM_177354	Vash1	433.99	6.97	24.64	238328	AI834978|D930046M13Rik|G630009D10Rik
chr3	89075975	89076277	MACS_peak_99816	433.26	302	NM_138679	Ash1l	433.26	13.78	24.99	192195	8030453L17Rik|Ash1|E430018P19Rik|Kmt2h
chr5	124477779	124478365	MACS_peak_144713	432.24	586	ENSMUST00000031347	Rilpl2	432.24	6.67	18.7	80291	-
chr1	22538285	22538623	MACS_peak_1311	432.03	338	NM_001012623	Rims1	432.03	6.64	18.69	116837	C030033M19Rik|RIM1|RIM1a|RIM1alpha|Rab3ip1|Rim|Serg1|mKIAA0340
chr13	100488065	100488935	MACS_peak_50861	432	870	uc007rqw.1	Gtf2h2	432	16.79	18.69	23894	44kDa|BTF2 p44|BTF2-p44|Btf2p44|p44
chr5	140523540	140525199	MACS_peak_112381	431.82	1659	NM_021528	Chst12	431.82	6.98	24.84	59031	AI595374|C4S-2|C4ST2
chr13	64185272	64186537	MACS_peak_48796	431.5	1265	NM_019986	Habp4	431.5	5.84	18.74	56541	4933413D03Rik|4933428J01Rik
chr5	134314382	134314760	MACS_peak_146023	431.08	378	NM_010365	Gtf2i	431.08	10.26	18.72	14886	6030441I21Rik|BAP-135|Diws1t|GtfII-I|Spin|TFII-I|WBSCR6
chr17	27709863	27711078	MACS_peak_79198	430.82	1215	NM_011861	Pacsin1	430.82	6.81	18.73	23969	A830061D09Rik|H74|mKIAA1379|syndapin
chr10	81147969	81149958	MACS_peak_19383	429.77	1989	NM_010731	Zbtb7a	429.77	8.96	18.79	16969	9030619K07Rik|9130006G12Rik|AI452336|FBI-1|Lrf|Pokemon|Zbtb7
chr6	91499756	91500137	MACS_peak_132959	429.7	381	NM_009531	Xpc	429.7	11.03	25.13	22591	-
chr8	111449158	111450691	MACS_peak_179892	427.8	1533	NM_176923	Wdr59	427.8	16.65	18.84	319481	5430401O09Rik|Cdw12
chr17	78934755	78936067	MACS_peak_83185	427.62	1312	NM_001024806	Cebpz	427.62	13.3	18.83	12607	AI848081|CBF2|Cbf|Cebpa-rs1
chr6	124430812	124431732	MACS_peak_135404	427.43	920	NM_153508	Clstn3	427.43	7.07	25.12	232370	CSTN3|Cs3|Cst-3|mKIAA0726
chr19	6464390	6465636	MACS_peak_91668	426.95	1246	uc008git.2	Nrxn2	426.95	15.02	18.84	18190	6430591O13Rik|mKIAA0921
chr14	69785166	69787735	MACS_peak_57851	426.5	2569	NM_153514	Rhobtb2	426.5	9.35	18.82	246710	Dbc2|E130206H14Rik|mKIAA0717
chr6	85340342	85342361	MACS_peak_132226	425.68	2019	NM_001003955	Rab11fip5	425.68	6.76	25.07	52055	9130206P09Rik|C75969|D6Ertd32e|GAF1|RIP11
chr1	58902879	58904182	MACS_peak_3142	425.27	1303	NM_172406	Trak2	425.27	6.78	25.08	70827	2900022D04Rik|4733401O11Rik|AI480836|AW046271|Als2cr3|CALS-C|GRIF-1|GRIF1|OIP98|mKIAA0549
chr1	127490837	127491660	MACS_peak_6893	425.09	823	NM_028135	Tmem163	425.09	20.15	25.08	72160	2610024A01Rik|SV31
chr7	44444874	44445212	MACS_peak_123820	424.94	338	NM_198250	Lrrc4b	424.94	7.14	25.07	272381	A830007M12|Lrig4
chr1	17097225	17097889	MACS_peak_1022	424.4	664	NM_020604	Jph1	424.4	13.38	18.83	57339	ENSMUSG00000054314|JP-1|Jp1
chr19	4811171	4811634	MACS_peak_69617	424.17	463	NM_019869	Rbm14	424.17	6.7	25.09	56275	1300007E16Rik|PSP2|Sytip|p16|p16K
chr7	30361932	30362772	MACS_peak_123290	423.94	840	NM_175478	Lrfn3	423.94	11.02	25.11	233067	A530045B06Rik|SALM4
chr1	127796611	127797238	MACS_peak_6924	422.33	627	uc007clb.1	Ccnt2	422.33	17.95	25.3	72949	2900041I18Rik|C81304|CycT2|CycT2a|CycT2b
chr19	5717705	5720407	MACS_peak_91516	422.24	2702	NM_001114597	Ehbp1l1	422.24	14.61	18.83	114601	G430002G23Rik
chr5	101765129	101765489	MACS_peak_108020	422.22	360	NM_173370	Cds1	422.22	7.6	25.27	74596	4833409J18Rik|AI314024|AW125888
chr9	67973281	67973760	MACS_peak_162615	421.28	479	uc009qmu.1	Vps13c	421.28	10.94	25.28	320528	AI552542|AV026040|C230055H22Rik|W51662|chorein
chr2	151728018	151728464	MACS_peak_92593	421.24	446	uc008nem.1	Psmf1	421.24	14.89	25.26	228769	AW048666|BC012260|PI31
chrX	73965810	73966357	MACS_peak_149413	420.75	547	NM_008224	Hcfc1	420.75	4.79	25.46	15161	AW060991|HCF|HCF1
chr2	32452144	32452949	MACS_peak_75411	420.29	805	NM_194335	Naif1	420.29	17.84	25.48	71254	2310007O20Rik|4933440H19Rik
chr6	147091139	147092367	MACS_peak_136755	420.05	1228	NM_001081237	Klhl42	420.05	11.15	25.3	232539	A330079N23Rik|AI450355|C230080I20Rik|Ctb9|Klhdc5|mKIAA1340
chr9	44047338	44048579	MACS_peak_142065	419.89	1241	NM_009382	Thy1	419.89	7.12	25.43	21838	CD90|T25|Thy-1|Thy-1.2|Thy1.1|Thy1.2
chr2	70825192	70825728	MACS_peak_87443	419.79	536	ENSMUST00000038584	Tlk1	419.79	10.21	25.31	228012	4930545J15Rik
chr14	121035563	121035925	MACS_peak_60480	419.71	362	ENSMUST00000026635	Farp1	419.71	9.97	18.86	223254	AW228844|BC030329|Cdep
chrX	98937792	98938288	MACS_peak_196339	419.41	496	NM_207633	Yipf6	419.41	10.24	18.87	77929	A430107J06Rik
chr15	98634763	98635213	MACS_peak_68038	419.33	450	ENSMUST00000003442	Cacnb3	419.33	16.52	18.86	12297	Beta3|CAB3|Ca(v)beta3|Cchb3
chr4	72199981	72200919	MACS_peak_125742	419.19	938	ENSMUST00000074216	Tle1	419.19	13.41	18.86	21885	C230057C06Rik|Estm14|Grg-1|Grg1|Tle4l
chr9	30942561	30943601	MACS_peak_184722	418.97	1040	ENSMUST00000068135	Adamts8	418.97	17.06	18.85	30806	METH-2|METH2
chr1	159614748	159615072	MACS_peak_8850	418.48	324	ENSMUST00000097514	Gm10530	418.48	17.57	25.36	100038672	ENSMUSG00000073528
chr3	96154768	96155692	MACS_peak_100417	417.77	924	NM_001025613	Otud7b	417.77	9.49	25.44	229603	2900060B22Rik|4930463P07Rik|AI462125|CEZANNE|Trabid2|Za20d1
chr9	70656294	70657619	MACS_peak_162861	417.57	1325	ENSMUST00000098589	Gm10642	417.57	6.64	25.43	100379146	ENSMUSG00000074213
chr13	38345715	38346587	MACS_peak_35770	417.48	872	NM_007556	Bmp6	417.48	9.19	25.39	12161	D13Wsu115e|Vgr1
chr13	24801656	24803509	MACS_peak_35269	416.9	1853	NM_024473	BC005537	416.9	6.11	25.46	79555	8030460C05Rik|C78201
chr14	54884373	54888095	MACS_peak_56489	416.64	3722	ENSMUST00000133397	Bcl2l2	416.64	18.62	18.97	12050	AW048834|Bcl-w|Gtrgal2|Gtrosa41|bclw|c98
chr9	59750895	59751345	MACS_peak_187707	415.61	450	ENSMUST00000128341	Myo9a	415.61	5.59	18.99	270163	4732465J09Rik|C130068I12Rik|C230003M11
chr4	126612795	126614371	MACS_peak_111656	415.31	1576	NM_001013755	5730409E04Rik	415.31	15.93	25.48	230757	7530403E16Rik|AI849033
chr7	5097571	5098178	MACS_peak_137158	415.08	607	NM_010147	Epn1	415.08	4.15	25.51	13854	AA269831|Ibp1
chr5	137746847	137747859	MACS_peak_112091	414.37	1012	NM_023910	Tsc22d4	414.37	10.66	25.57	78829	0610009M14Rik|1700023B23Rik|AI415410|Thg-1pit|Tilz2
chr7	27280753	27282150	MACS_peak_138215	414.32	1397	NM_010950	Numbl	414.32	7.77	25.58	18223	nbl
chr10	63338564	63339050	MACS_peak_15021	413.8	486	ENSMUST00000120239	Sirt1	413.8	17.38	25.65	93759	AA673258|SIR2L1|Sir2|Sir2a|Sir2alpha
chr17	34956954	34959238	MACS_peak_61298	413.73	2284	NM_010478	Hspa1b	413.73	4.98	25.55	15511	Hsp70|Hsp70-1|Hsp70.1|hsp68
chrX	152208769	152209665	MACS_peak_170429	413.22	896	NM_001005475	Iqsec2	413.22	5.98	25.65	245666	Brag1
chr1	172172328	172173164	MACS_peak_9778	413.02	836	uc007dpr.2	Dcaf8	413.02	8.04	25.66	98193	AA408877|AA433120|AA792214|AU018973|C76055|D1Dau35e|D1Ucla4|H326|Wdr42a
chrX	72913902	72914293	MACS_peak_195370	412.46	391	NM_019405	Cetn2	412.46	11.09	19.02	26370	1110034A02Rik|AI326150|Calt|caltractin
chr15	8444124	8444463	MACS_peak_52473	412.29	339	NM_027707	Nipbl	412.29	12.71	25.64	71175	Idn3
chr4	119220159	119220862	MACS_peak_110830	412.15	703	ENSMUST00000141112	AU022252	412.15	20.21	25.63	230696	AI450326
chr5	28389502	28389817	MACS_peak_117223	411.94	315	NM_028234	Rbm33	411.94	8.9	25.62	381626	3200001K10Rik|6430512A10Rik|AA386890|Prr8
chr2	160646607	160647032	MACS_peak_109071	411.38	425	uc008nqx.1	Top1	411.38	5.79	19.02	21969	AI467334|D130064I21Rik|Top-1
chr12	69681514	69681852	MACS_peak_39406	411.24	338	NM_001135559	Sos2	411.24	18.29	19.01	20663	SOS-2|mSOS-2
chr11	3452208	3452956	MACS_peak_23530	411.09	748	NM_145355	Rnf185	411.09	22.6	19.02	193670	-
chr3	89430239	89430729	MACS_peak_88637	410.77	490	NM_001293768	Pygo2	410.77	7.4	25.74	68911	1190004M21Rik
chr1	182483993	182484372	MACS_peak_12555	410.46	379	uc007dyf.1	Capn2	410.46	6.54	19.06	12334	AI326419|Capa-2|Capa2|m-calpain|m-calpin
chr17	83631073	83631895	MACS_peak_71901	410.03	822	NM_153512	Kcng3	410.03	19.43	25.6	225030	KV6.3|Kv10.1a|Kv10.1b
chr17	32361460	32361964	MACS_peak_79877	409.87	504	NM_011717	Wiz	409.87	9.01	19.07	22404	-
chr8	3279028	3279617	MACS_peak_131138	409.37	589	NM_010568	Insr	409.37	7.21	25.8	16337	4932439J01Rik|CD220|D630014A15Rik|IR|IR-A|IR-B
chr18	35964829	35965219	MACS_peak_74571	408.82	390	NM_028707	Psd2	408.82	15.18	25.56	74002	6330404E20Rik|AW125584|EFA6C
chr5	131437937	131440693	MACS_peak_125171	408.75	2756	NM_177047	Auts2	408.75	9.41	25.54	319974	2700063G02Rik|A730011F23Rik|D830032G16Rik
chr11	115163340	115163951	MACS_peak_33949	407.92	611	NM_012030	Slc9a3r1	407.92	6.75	19.06	26941	EBP-50|NHE-RF|NHERF-1|NHERF1
chr4	129354062	129354504	MACS_peak_130834	407.75	442	NM_028603	Zbtb8a	407.75	11.58	19.06	73680	2410081M15Rik|AI480941
chr14	25927297	25927672	MACS_peak_46389	407.73	375	NM_026679	Tmem254a	407.73	21.05	25.53	66039	0610008K04Rik|0610010A22Rik|AA960404|D14Ertd449e|Tmem254
chr2	18219470	18219899	MACS_peak_83582	407.47	429	NM_007869	Dnajc1	407.47	19	25.62	13418	4733401K02Rik|AA960110|D230036H06Rik|Dnajl1|ERdj1|ERj1p|MTJ1
chr16	50224680	50225293	MACS_peak_73799	407.08	613	NM_027444	Bbx	407.08	8.59	19.08	70508	5530401J07Rik|5730403O13Rik
chr3	107500367	107500740	MACS_peak_101320	407	373	NM_172271	Slc6a17	407	7.07	25.59	229706	D130012J15Rik|Ntt4
chr19	59300868	59301688	MACS_peak_82361	406.05	820	NM_001033222	Pdzd8	406.05	6.18	25.63	107368	A630041P07Rik|AV329468|AW228944|Pdzk8
chr2	150407136	150407486	MACS_peak_107789	405.56	350	NM_001177550	Zfp442	405.56	21.31	19.12	668923	OTTMUSG00000015730|ZIPO-II
chr16	32877306	32877766	MACS_peak_54976	405.28	460	uc007yzn.1	1700021K19Rik	405.28	9.86	26.1	NA	NA
chr8	11448188	11449287	MACS_peak_172083	404.02	1099	NM_009932	Col4a2	404.02	9.6	19.16	12827	Col4a-2
chr11	75795520	75796057	MACS_peak_25369	403.66	537	NM_007873	Doc2b	403.66	6.31	25.56	13447	-
chr7	19221439	19222975	MACS_peak_137728	402.93	1536	NM_175668	Gpr4	402.93	14.07	25.52	319197	-
chr15	79546194	79546661	MACS_peak_65893	401.85	467	NM_199080	Ddx17	401.85	4.08	19.23	67040	2610007K22Rik|A430025E01Rik|AI047725|C80929|Gm926|p72
chr14	55657878	55658741	MACS_peak_48497	401.14	863	NM_023397	Mdp1	401.14	11.88	25.55	67881	1810034K20Rik|AI035604
chr19	60580327	60581023	MACS_peak_73250	401.05	696	NM_030197	Cacul1	401.05	4.18	26.17	78832	2700078E11Rik|2810417M16Rik|9830127L17Rik|AI450346|D130033C15Rik
chr1	190170267	190170680	MACS_peak_12977	400.52	413	NM_008937	Prox1	400.52	16.5	19.23	19130	A230003G05Rik
chr4	119627619	119628170	MACS_peak_110909	400.23	551	NM_172699	Foxj3	400.23	7.9	25.62	230700	C330039G02Rik|Fhd6
chr16	92465832	92466169	MACS_peak_65443	399.79	337	NM_001081549	Rcan1	399.79	14.49	25.62	54720	Adapt78|CALP1L|CSP1|DSC1|Dscr1|MCIP1|RCN1
chr15	81811413	81811720	MACS_peak_56702	399.64	307	NM_017376	Tef	399.64	10.66	25.63	21685	2310028D20Rik
chr6	113374608	113375259	MACS_peak_156263	399.4	651	uc009dfr.1	Tada3	399.4	8.79	19.24	101206	1110004B19Rik|ADA3|AI987856|Tada3l
chr4	118225798	118226377	MACS_peak_129320	399.11	579	NM_011213	Ptprf	399.11	4.82	19.24	19268	AA591035|LAR|LARS|RPTP-LAR
chr10	29146563	29147753	MACS_peak_15225	398.85	1190	NM_026138	Soga3	398.85	4.28	19.27	67412	6330407J23Rik
chr8	82990346	82990794	MACS_peak_177639	397.9	448	uc029wub.1	Rnf150	397.9	25.72	19.24	330812	A630007N06Rik|C030044C12Rik|Greul5|mKIAA1214
chr2	164907652	164907958	MACS_peak_94106	397.38	306	NM_199027	Zfp335	397.38	11.69	25.73	329559	1810045J01Rik|NIF-1|Nif1|Znf335
chr5	121593361	121593751	MACS_peak_110165	397.24	390	NM_009656	Aldh2	397.24	6.99	26.26	11669	AHD-M1|ALDH-E2|ALDHI|Ahd-5|Ahd5
chr11	108920799	108921193	MACS_peak_25759	396.67	394	ENSMUST00000140821	Axin2	396.67	15.75	26.23	12006	Axi1|Axil|Conductin
chr9	108263480	108263815	MACS_peak_191762	396.45	335	NM_010017	Dag1	396.45	5.7	19.29	13138	D9Wsu13e|DG|Dp427|Dp71
chr9	60869574	60872283	MACS_peak_143502	394.31	2709	NM_028283	Uaca	394.31	5.54	26.16	72565	2700059D02Rik|nucling
chr4	133061375	133066277	MACS_peak_131302	393.91	4902	NM_146155	Ahdc1	393.91	6.41	19.36	230793	D030015G18Rik
chr19	7482938	7483291	MACS_peak_91832	393.78	353	NM_053076	Rtn3	393.78	4.37	19.36	20168	RTN3-A1
chr1	162477679	162478107	MACS_peak_8078	393.01	428	ENSMUST00000159707	Gm10176	393.01	6.14	26.24	100049562	ENSMUSG00000066752
chr3	95495627	95496062	MACS_peak_100275	392.69	435	NM_009709	Arnt	392.69	7.24	25.8	11863	D3Ertd557e|Drnt|ESTM42|Hif1b|W08714|bHLHe2|mKIAA4051
chr12	111377096	111377718	MACS_peak_43680	392.28	622	NM_183016	Cdc42bpb	392.28	7.66	19.42	217866	MRCKb
chr1	150361590	150362137	MACS_peak_9408	392.13	547	NM_145511	BC003331	392.13	7.17	19.42	226499	1810053E15Rik|Odr4|odr-4
chr18	60567370	60567705	MACS_peak_76185	391.77	335	uc008fal.1	Rbm22	391.77	9.24	25.77	66810	8430430L24Rik
chr12	108202075	108203334	MACS_peak_33203	391.57	1259	NM_009832	Ccnk	391.57	8.57	26.38	12454	AW123198|AW413594|CPR4|CycK
chr4	155996188	155996518	MACS_peak_134262	391.5	330	NM_011341	Sdf4	391.5	5.13	19.42	20318	Cab45
chrX	7947124	7947767	MACS_peak_166763	391.13	643	ENSMUST00000154244	Hdac6	391.13	14.6	25.78	15185	Hd6|Hdac5|Sfc6|mHDA2
chr4	66185123	66185508	MACS_peak_125546	390.06	385	NM_019514	Astn2	390.06	11.39	19.5	56079	1d8|Astnl|bM452J22.1
chr17	36964833	36965534	MACS_peak_80319	389.9	701	NM_029602	Znrd1as	389.9	18.97	19.48	76416	1700022C21Rik|AI746295|Znrd1-as
chr12	12939609	12940616	MACS_peak_31380	389.56	1007	uc007nbf.2	Mycn	389.56	5.08	25.86	18109	N-myc|Nmyc|Nmyc-1|Nmyc1|bHLHe37|c-nmyc
chr2	30255167	30257332	MACS_peak_75107	389.24	2165	NM_177725	Lrrc8a	389.24	6.08	26.3	241296	Lrrc8|mKIAA1437
chr19	47464063	47464411	MACS_peak_94862	389.02	348	NM_008018	Sh3pxd2a	389.02	7.58	19.51	14218	2310014D11Rik|AA589508|AI256723|AI413738|C230050L11|EG329070|Fish|Gm5098|Sh3md1|TSK5|Tks5
chr2	29227577	29228221	MACS_peak_74934	388.96	644	NM_133500	Ntng2	388.96	6.9	26.26	171171	2610016D08Rik|Lmnt2
chr8	111258770	111259216	MACS_peak_155057	388.9	446	ENSMUST00000003404	Glg1	388.9	6.09	25.83	20340	AI593353|AW537898|CFR|CFR-1|ESL-1|MG-160|MG160|Selel
chr7	128253155	128253657	MACS_peak_146275	388.52	502	NM_001289550	Tgfb1i1	388.52	23.32	25.87	21804	ARA55|Hic5|TSC-5|hic-5
chr7	126829211	126830199	MACS_peak_146073	387.43	988	NM_026884	Fam57b	387.43	5.91	25.87	68952	1500016O10Rik|A330104J06Rik|AI413816|AW060769
chr9	65141153	65141553	MACS_peak_162283	387.31	400	ENSMUST00000034961	Igdcc3	387.31	14.07	25.92	19289	2810401C09Rik|AI851425|Punc|WI-14920
chr12	25095662	25096092	MACS_peak_36842	385.93	430	NM_010496	Id2	385.93	7.41	19.56	15902	AI255428|C78922|Idb2|bHLHb26
chr11	3289868	3292081	MACS_peak_17743	385.91	2213	uc007hsj.2	Patz1	385.91	6.71	26.49	56218	8430401L15Rik|AI447519|Mazr|Patz|Zfp278
chr6	122837820	122838204	MACS_peak_135382	385.62	384	NM_021899	Foxj2	385.62	13.97	25.92	60611	Fhx
chr14	52008227	52009662	MACS_peak_56351	385.37	1435	NM_027248	Zfp219	385.37	10.69	19.58	69890	2010302A17Rik
chr16	17925210	17925927	MACS_peak_54040	384.93	717	NM_153150	Slc25a1	384.93	6.32	26.61	13358	1300019P08Rik|2610100G11Rik|AI194714|Ctp|Dgsj|Slc20a3
chr2	25982781	25983282	MACS_peak_84058	384.79	501	NM_001276359	Camsap1	384.79	7.73	26.13	227634	9530003A05Rik|C77823|PRO2405
chr4	156237342	156237728	MACS_peak_102424	384.02	386	uc029vbi.1	Noc2l	384.02	8.44	26.67	57741	AA410003|AF155546|NIR
chr2	71543643	71544924	MACS_peak_77804	383.63	1281	NM_010054	Dlx2	383.63	7.13	26.72	13392	AW121999|Dlx-2|Tes-1
chr17	35149098	35149600	MACS_peak_68984	383.52	502	ENSMUST00000174805	Prrc2a	383.52	3.74	26.13	53761	3110039B05Rik|Bat-2|Bat2|D17H6S51E|G2|Wbp12|mKIAA4178
chr12	108361513	108362234	MACS_peak_37437	383.03	721	NM_010010	Cyp46a1	383.03	8.63	26.19	13116	Cyp46
chr8	124433798	124434338	MACS_peak_156596	382.77	540	ENSMUST00000140012	Pgbd5	382.77	7.91	26.19	209966	2900019M05Rik|AI854313
chr11	85311360	85312111	MACS_peak_30888	382.6	751	uc007krm.1	AK053727	382.6	11.82	19.73	NA	NA
chr16	30601013	30602124	MACS_peak_71532	382.13	1111	NM_177632	Fam43a	382.13	25.57	19.73	224093	Tuf1
chr9	44715313	44716665	MACS_peak_142149	382.08	1352	NM_153537	Phldb1	382.08	7.08	26.69	102693	AU041016|D330037A14Rik|Ll5a
chr10	79682194	79682590	MACS_peak_19126	378.85	396	NM_177613	Cdc34	378.85	8.05	19.82	216150	AI327276|UBE2R1
chr7	119859379	119859915	MACS_peak_169156	378.49	536	NM_173408	Dcun1d3	378.49	7.5	19.82	233805	1700020A13Rik|BC030335
chr6	53680935	53681426	MACS_peak_130666	377.34	491	uc009bzi.1	Creb5	377.34	16.96	26.27	231991	9430076C15Rik|CRE-BPa|Crebpa|D430026C09Rik
chr5	34000779	34003508	MACS_peak_104629	377.3	2729	NM_001001985	Nat8l	377.3	7.56	26.85	269642	1110038O08Rik|Shati
chr6	42351474	42351969	MACS_peak_151195	374.69	495	NM_011777	Zyx	374.69	7.77	19.83	22793	9530098H06Rik|R75157
chr11	94473375	94474198	MACS_peak_27308	373.28	823	NM_009783	Cacna1g	373.28	12.15	26.25	12291	Cav3.1d|[a]1G|a1G|alpha-1G|mKIAA1123
chr3	103741377	103741841	MACS_peak_117658	373.27	464	NM_010432	Hipk1	373.27	8.03	19.88	15257	1110062K04Rik|Myak
chr16	18426355	18426800	MACS_peak_60879	373.21	445	ENSMUST00000115609	Comt	373.21	8.98	26.23	12846	Comt1|D16Wsu103e|D330014B15Rik
chr4	145622663	145624279	MACS_peak_113998	373.19	1616	ENSMUST00000105739	Gm13212	373.19	11.53	26.23	433801	OTTMUSG00000010965
chr1	75236464	75236948	MACS_peak_3738	372.72	484	ENSMUST00000055223	Dnajb2	372.72	7.28	26.92	56812	2700059H22Rik|Dnajb10|Hsj1|mDj8
chr2	102449365	102451792	MACS_peak_103706	372.13	2427	NM_010218	Fjx1	372.13	9.64	19.84	14221	-
chr11	120483014	120483822	MACS_peak_35044	372.01	808	uc007msx.2	Hgs	372.01	5.41	19.89	15239	Hgr|Hrs|ZFYVE8|tn
chr1	115684755	115685218	MACS_peak_7185	371.13	463	ENSMUST00000043725	Cntnap5a	371.13	18.49	19.93	636808	Caspr5-1|EG636808
chr5	32136471	32136805	MACS_peak_104456	370.91	334	NM_008037	Fosl2	370.91	4.92	26.92	14284	Fra-2
chr2	13077209	13077607	MACS_peak_96870	370.04	398	NM_009105	Rsu1	370.04	8.97	19.93	20163	RsuI|rsp-1
chr3	146812637	146812960	MACS_peak_91432	369.93	323	ENSMUST00000102515	Prkacb	369.93	6.89	26.94	18749	CbPKA|Pkacb
chr6	148831163	148831467	MACS_peak_136850	368.8	304	NM_001081113	Ipo8	368.8	17.96	26.44	320727	6230418K12Rik|Abcc10|C130009K11Rik|MRP7|OM-1|Om1|Ranbp8
chr12	108274337	108275417	MACS_peak_43259	368.59	1080	NM_001159910	Ccdc85c	368.59	5.84	19.88	668158	EG668158|Gm265|Gm9010
chr19	10842543	10843059	MACS_peak_92072	368.44	516	NM_023044	Slc15a3	368.44	17.41	19.88	65221	Ci1|cI-1
chr2	35165647	35166018	MACS_peak_99197	367.78	371	uc008jjy.1	Cep110	367.78	11.64	19.91	NA	NA
chr15	76070181	76070627	MACS_peak_65361	367.18	446	NM_028364	Puf60	367.18	11.15	19.9	67959	2410104I19Rik|2810454F19Rik|SIAHBP1
chr17	36951422	36951792	MACS_peak_80317	366.76	370	NM_029632	Ppp1r11	366.76	6.95	19.92	76497	1500041B02Rik|AV117883|Hcgv|Tcte5|Tctex-5|Tctex5
chr9	44319534	44320282	MACS_peak_142113	366.73	748	NM_027909	C2cd2l	366.73	6.44	27.03	71764	1300006O23Rik|Tmem24
chr6	99520596	99521162	MACS_peak_133587	366.54	566	ENSMUST00000177227	Foxp1	366.54	11.75	26.5	108655	3110052D19Rik|4932443N09Rik|AI461938|AW494214
chr19	10948277	10949266	MACS_peak_92086	366.14	989	NM_023731	Ccdc86	366.14	7.33	19.88	108673	4933411H20Rik|6720480F16Rik|D19Ertd678e
chr4	55080665	55083068	MACS_peak_124823	365.71	2403	NM_172867	Zfp462	365.71	12.46	19.92	242466	6030417H05|9430078C22Rik|Gt4-2|Zfpip
chr3	53516351	53517041	MACS_peak_97960	365.59	690	NM_172862	Frem2	365.59	16.36	26.54	242022	6030440P17Rik|8430406N05Rik|Gm409|b2b1562Clo|my|ne|nv1
chr7	19271513	19271854	MACS_peak_122408	365.21	341	NM_009499	Vasp	365.21	8.08	27.05	22323	-
chr7	133123140	133123483	MACS_peak_130259	365.11	343	NM_009980	Ctbp2	365.11	12.02	27.08	13017	AA407280|D7Ertd45e|Gtrgeo6|Ribeye
chr12	75630839	75631458	MACS_peak_30705	364.83	619	NM_028203	Wdr89	364.83	4.87	27.13	72338	2600001A11Rik
chrX	20617502	20618082	MACS_peak_148393	364.49	580	NM_001167775	Rbm10	364.49	10.74	27.11	236732	E430039K10Rik
chr5	124862014	124862424	MACS_peak_124514	364.08	410	ENSMUST00000036206	Ccdc92	364.08	8.44	26.75	215707	AW050178|D5Bwg0834e
chr18	37323329	37323715	MACS_peak_86839	364.02	386	NM_053130	Pcdhb5	364.02	17.91	19.99	93876	Pcdhb4A|PcdhbE
chr2	73436959	73437691	MACS_peak_87669	363.67	732	NM_153138	Wipf1	363.67	16.73	26.7	215280	AI115543|D2Ertd120e|WIP|Waspip
chr18	37514430	37515425	MACS_peak_74827	363.65	995	NM_053146	Pcdhb21	363.65	22.84	26.7	93892	Pcdhb18|PcdhbU
chr11	69681662	69681970	MACS_peak_24756	363.56	308	NM_030702	Senp3	363.56	11.48	26.69	80886	AA408656|Smt3ip|Smt3ip1
chr5	136987018	136987803	MACS_peak_146504	362.55	785	NM_011962	Plod3	362.55	10.61	20.01	26433	AI414586|LH3
chr8	106885691	106886526	MACS_peak_154692	361.97	835	NM_145412	Chtf8	361.97	8.08	26.87	214987	5830457O10Rik|Ctf8|Derpc
chr1	134332289	134332928	MACS_peak_6598	360.95	639	NM_001144855	Ppfia4	360.95	7.79	27.41	68507	100042382|1110008G13Rik|AI448359|AI852265|C81506|Gm3812
chr13	54999621	54999924	MACS_peak_41364	360.83	303	NM_153131	Unc5a	360.83	10.01	26.94	107448	Unc5h1|mKIAA1976
chr18	37751778	37752240	MACS_peak_74868	360.69	462	NM_033579	Pcdhgb7	360.69	8.52	26.95	93704	-
chr8	120145202	120145663	MACS_peak_180964	359.54	461	NM_172286	6430548M08Rik	359.54	6.92	20.23	234797	AW049007|Kiaa0513|mKIAA0513
chrX	120364793	120365308	MACS_peak_197085	359.18	515	NM_001271809	Pcdh11x	359.18	8.34	20.25	245578	PCDHX|PCDHX11|Pcdh11
chr13	118386629	118387344	MACS_peak_44675	359.02	715	ENSMUST00000181168	B430218F22Rik	359.02	11.93	26.93	100306874	ENSMUSG00000058378
chr8	33599620	33600018	MACS_peak_150270	358.35	398	NM_017374	Ppp2cb	358.35	6.93	26.92	19053	AI115466|D8Ertd766e|PP2Ac
chr7	3110217	3111874	MACS_peak_121684	357.2	1657	ENSMUST00000069044	Gm7353	357.2	14.32	27.54	664817	EG664817
chr9	46012819	46013130	MACS_peak_160570	357.07	311	NM_027498	Sik3	357.07	9.46	27.09	70661	5730525O22Rik|9030204A07Rik|AI447252|AI846254|AI849445|Qsk|SIK-3|mKIAA0999
chr12	95695356	95695941	MACS_peak_36500	356.97	585	ENSMUST00000110117	Flrt2	356.97	8.09	27.08	399558	-
chr18	10181224	10181792	MACS_peak_73040	355.73	568	NM_009071	Rock1	355.73	13.92	27.11	19877	1110055K06Rik|Rock-I
chr4	151083676	151084200	MACS_peak_101741	355.7	524	NM_001081557	Camta1	355.7	4.24	27.45	100072	1810059M14Rik|2310058O09Rik|AI316882|AW987475|mKIAA0833
chr6	35051061	35051559	MACS_peak_114970	355.05	498	NM_016877	Cnot4	355.05	7.76	27.43	53621	Not4|Not4h|Not4hp
chr2	36082828	36084070	MACS_peak_85513	354.44	1242	NM_008500	Lhx6	354.44	10.13	27.15	16874	Lhx6.1
chr4	42461709	42462729	MACS_peak_93861	353.5	1020	uc029usi.1	4933409K07Rik	353.5	11.06	27.56	108816	AV071682|b1402
chr11	94557101	94558357	MACS_peak_24164	352.52	1256	NM_153807	Acsf2	352.52	5.65	27.57	264895	-
chr8	84872257	84872832	MACS_peak_153426	352.23	575	NM_001168244	Syce2	352.23	13.03	27.05	71846	1700013H19Rik|AA407907|Cesc1
chr16	91269768	91271939	MACS_peak_57934	352.13	2171	NM_016968	Olig1	352.13	3.13	27.57	50914	AI836478|AW494459|Bhlhb6|Olg-1|Oligo1|bHLHe21
chrX	74366378	74367586	MACS_peak_168360	351.78	1208	NM_145405	Ubl4	351.78	18.96	27.07	NA	NA
chr8	69134773	69136159	MACS_peak_176371	351.52	1386	ENSMUST00000185176	Lzts1	351.52	6.47	20.52	211134	F37|FEZ1|PSD-Zip70
chr7	3303531	3303959	MACS_peak_159368	351.18	428	NM_011102	Prkcg	351.18	8.78	20.55	18752	PKCgamma|Pkcc|Prkcc
chr9	80310292	80311390	MACS_peak_189589	350.89	1098	NM_001039546	Myo6	350.89	14.94	20.56	17920	BC029719|Tlc|sv
chr18	67205358	67206295	MACS_peak_76786	350.08	937	NM_024190	Chmp1b	350.08	13.76	27.22	67064	2810405I11Rik|Chmp1b1
chr15	99316460	99317018	MACS_peak_52061	348.33	558	ENSMUST00000145482	Prpf40b	348.33	4.78	27.94	54614	2610317D23Rik|Hypc
chr15	74748529	74751427	MACS_peak_65273	348.18	2898	NM_011838	Lynx1	348.18	8.26	20.64	23936	AI838844|SLURP-2
chr5	111284991	111287203	MACS_peak_122570	348.04	2212	NM_001267622	Ttc28	348.04	5.06	27.27	209683	2310015L07Rik|6030435N04|AI428795|AI851761|BC002262|TPRBK
chr14	54875689	54876796	MACS_peak_48412	347.91	1107	NM_001167908	Ppp1r3e	347.91	9.44	27.25	105651	A630071A11Rik|AW049239|Gm1211
chr9	100737977	100738284	MACS_peak_164368	347.88	307	uc009rey.1	Stag1	347.88	11.7	27.24	20842	AU045003|SA-1|Scc3
chr4	129010562	129011368	MACS_peak_130781	347.62	806	NM_016895	Ak2	347.62	8.43	20.65	11637	Ak-2|D4Ertd220e
chr11	53350766	53351129	MACS_peak_20404	347.54	363	NM_033565	Aff4	347.54	4.49	27.93	93736	AF5Q31|Alf4|Laf4l|MCEF
chr3	103914429	103915153	MACS_peak_100971	347.52	724	NM_172684	Rsbn1	347.52	4.69	27.23	229675	C230004D03Rik|E330004N01|Rosbin|Rsbn|Rsbp|mKIAA3002
chr4	129142534	129143361	MACS_peak_130799	347.31	827	NM_027402	Fndc5	347.31	16.53	20.68	384061	1500001L03Rik|AI836596|C87088|PeP|Pxp
chr6	107529725	107530243	MACS_peak_133812	346.93	518	NM_008516	Lrrn1	346.93	5.69	27.28	16979	2810047E21Rik|NLRR-1
chrX	60891365	60893430	MACS_peak_149138	345.81	2065	NM_009237	Sox3	345.81	7.7	28.12	20675	Sox-3
chr1	133914444	133915310	MACS_peak_8861	345.58	866	NM_054077	Prelp	345.58	11.34	20.69	116847	7330409J17Rik|SLRR2A
chr3	127837148	127837492	MACS_peak_102271	344.64	344	NM_145964	Ap1ar	344.64	4.15	27.53	211556	AA407621|C78909|Gadkin
chr15	78718403	78718741	MACS_peak_56224	344.53	338	uc007wrg.1	Elfn2	344.53	9.3	27.53	207393	6330514E13|AW048948|BC094219|Lrrc62|Ppp1r29
chr3	129878605	129878935	MACS_peak_102329	344.48	330	NM_023196	Pla2g12a	344.48	7.76	27.53	66350	2310004B05Rik|GXII|GXII-1|GXII-1-PLA2|Pla2g12|Rossy|mGXII-1
chr6	90716207	90716529	MACS_peak_132818	343.95	322	NM_001134383	Iqsec1	343.95	20.19	27.56	232227	AW561907|BC026481|BRAG2|D6Ertd349e|cI-43
chr9	108452316	108452739	MACS_peak_165202	342.44	423	NM_030075	Klhdc8b	342.44	11.75	27.62	78267	4931406O17Rik
chr17	25990066	25990885	MACS_peak_78906	342.08	819	NM_153140	Rab11fip3	342.08	4.39	20.86	215445	Cart1|D030060O14Rik|Rab11-FIP3|mKIAA0665
chr11	97362550	97363423	MACS_peak_27557	341.85	873	NM_138657	Socs7	341.85	7.1	27.57	192157	2310063P06Rik|C85125|Nap4
chr4	139574719	139575597	MACS_peak_113392	341.09	878	NM_001205173	Iffo2	341.09	8.99	27.68	212632	C79267
chr1	86045862	86046572	MACS_peak_4874	340.96	710	NM_001144992	2810459M11Rik	340.96	10.48	27.68	72792	-
chr12	111833127	111833894	MACS_peak_33662	340.82	767	NM_011625	Ppp1r13b	340.82	6.13	28.58	21981	AI449786|ASPP1|AW545810|Tp53bp2|Trp53bp2|p85
chr10	9900530	9901079	MACS_peak_12067	340.56	549	ENSMUST00000141722	Stxbp5	340.56	7	27.76	78808	0710001E20Rik|4930565N16Rik|AW742610|LGL3|mKIAA1006
chr2	168268473	168269331	MACS_peak_94547	340.39	858	NM_001081134	Kcng1	340.39	12.06	27.76	241794	AW536275|OTTMUSG00000016048
chr15	98843594	98846546	MACS_peak_51995	340.12	2952	NM_001033276	Kmt2d	340.12	4.15	28.57	381022	ALR|BC032281|BC058659|C430014K11Rik|KMT2B|Mll2|Mll4
chr11	88981068	88982167	MACS_peak_31431	340	1099	NM_016706	Coil	340	11.14	20.99	12812	C79982|Cln80|p80|p80-coilin
chr1	72857936	72862508	MACS_peak_4977	339.8	4572	ENSMUST00000027377	Igfbp5	339.8	8.51	20.97	16011	AI256729|AW208790|IGFBP-5|IGFBP-5P
chr1	134040215	134041162	MACS_peak_8863	339.8	947	NM_021355	Fmod	339.8	10.26	20.97	14264	AI131919|AU041740|SLRR2E
chr1	134955491	134955942	MACS_peak_7600	339.27	451	ENSMUST00000112163	Ppp1r12b	339.27	7.39	27.81	329251	1810037O03Rik|9530009M10Rik|AI132431|Mypt2
chr1	134560170	134560542	MACS_peak_6623	338.87	372	ENSMUST00000047714	Kdm5b	338.87	5.04	28.6	75605	2010009J12Rik|2210016I17Rik|AW556288|D1Ertd202e|Jarid1b|PLU-1|PUT1|Plu1|RBBP2H1A|Rb-Bp2|mKIAA4034
chr10	28465757	28466060	MACS_peak_15193	338.53	303	NM_008983	Ptprk	338.53	5.54	21.11	19272	AI853699|PTPk|RPTPkappa
chr10	111164801	111165196	MACS_peak_18756	338.4	395	NM_175489	Osbpl8	338.4	7.17	27.85	237542	AA536976|AA536995|C730029P18Rik|D330025H14Rik|ORP-8
chr7	45872771	45873101	MACS_peak_162240	338.38	330	ENSMUST00000002855	Kdelr1	338.38	12.64	21.12	68137	8030486F04Rik|AW215843|Erd2.1
chr7	19076199	19076701	MACS_peak_137686	337.88	502	NM_010058	Dmwd	337.88	7.04	27.87	13401	DMR-N9|Dm9
chr2	30285726	30286354	MACS_peak_84596	337.87	628	NM_177648	Dolk	337.87	6.88	27.86	227697	BC026973|Tmem15|mKIAA1094
chr15	57953487	57953821	MACS_peak_64060	337.64	334	uc007vsx.1	Tbc1d31	337.64	14.82	21.15	210544	4B3|D330013L20Rik|Gm85|Wdr67
chr7	128271378	128272615	MACS_peak_129915	337.54	1237	NM_145590	BC017158	337.54	7.74	28.68	233913	-
chr18	54897164	54899619	MACS_peak_67178	337.53	2455	NM_175751	Zfp608	337.53	3.96	28.67	269023	4932417D18Rik|D430007A19Rik|Znf608
chr11	116541338	116542038	MACS_peak_34200	337.07	700	NM_173755	Ube2o	337.07	6.1	21.15	217342	9630022H21|B230113M03Rik|E2-230K|mKIAA1734
chr11	98709410	98709757	MACS_peak_27783	336.6	347	uc007lhc.1	Med24	336.6	15.26	27.89	23989	911GSE|AU040102|AW547152|D11Ertd307e|DRIP100|Gse2|Pparb2|Pparbp2|R75526|Thrap4|Trap100
chr8	11561417	11562575	MACS_peak_172105	336.49	1158	NM_011919	Ing1	336.49	6.74	21.12	26356	2610028J21Rik|AA407184|AI875420|mING1h|p33Ing1|p37Ing1b
chr1	75247040	75247620	MACS_peak_5142	336.28	580	NM_008985	Ptprn	336.28	12.87	21.11	19275	IA-2|mIA-A|mKIAA4064
chr6	115993488	115995005	MACS_peak_156697	336.25	1517	NM_026376	Plxnd1	336.25	8.37	21.11	67784	6230425C21Rik|b2b1863Clo|b2b553Clo
chr19	3768021	3768340	MACS_peak_78414	336.12	319	NM_144871	Suv420h1	336.12	12.41	27.91	225888	AA117471|C630029K18Rik|KMT5B|Suv4-20h1
chr2	119547327	119547627	MACS_peak_80084	335.69	300	NM_172857	Exd1	335.69	10.68	28.85	241624	4932702D22Rik|Exdl1|mExd1
chr16	20619214	20620243	MACS_peak_61040	335.46	1029	NM_028420	Camk2n2	335.46	3.98	27.87	73047	2900075A18Rik
chr15	64312348	64312673	MACS_peak_48945	335.43	325	NM_001276462	Asap1	335.43	6.88	28.84	13196	AV239055|DEF-1|Ddef1|PAP|mKIAA1249|s19
chr15	19013191	19013791	MACS_peak_61804	335.1	600	NM_009865	Cdh10	335.1	7.27	21.21	320873	A830016G23Rik|C030003B10Rik|C030011H18Rik
chr1	125435284	125435727	MACS_peak_7829	335.06	443	NM_023735	Actr3	335.06	7.18	21.2	74117	1200003A09Rik|Arp3
chr3	96577876	96578588	MACS_peak_117088	334.56	712	NM_027241	Polr3gl	334.56	18.39	21.16	69870	2010003I19Rik
chr5	76998191	76999517	MACS_peak_140348	333.81	1326	NM_025691	Srp72	333.81	10.24	21.14	66661	5730576P14Rik|72kDa|AI132477|BC019196|C77589
chr11	96064951	96065388	MACS_peak_27454	333.69	437	ENSMUST00000100528	Ube2z	333.69	6.21	27.91	268470	AW049199|C030047H17Rik|D11Moh35
chr7	127776669	127777347	MACS_peak_146217	332.67	678	ENSMUST00000047075	Setd1a	332.67	9.26	27.95	233904	BC010250|KMT2F|Nsccn1|mKIAA0339|mNSC1
chr4	117550761	117551259	MACS_peak_110612	331.87	498	uc008uiu.2	Eri3	331.87	9.04	27.93	140546	PINT1|Prnpip1
chr5	75933816	75934203	MACS_peak_120409	331.49	387	NM_010612	Kdr	331.49	16.59	27.9	16542	6130401C07|Flk-1|Flk1|Krd-1|Ly73|VEGFR-2|VEGFR2|sVEGFR-2
chr5	30711563	30712002	MACS_peak_117385	331.4	439	uc008wvw.1	Dpysl5	331.4	17.42	27.92	65254	CRAM|CRMP-5|Crmp5
chr4	155624882	155625654	MACS_peak_102344	331.21	772	uc008wec.1	Cdk11b	331.21	8.56	29.02	12537	AA989746|CDK11-p110|CDK11-p46|CDK11-p58|Cdc11b|Cdc2l1|Cdc2l2|Cdk11|p58
chr12	81729081	81729836	MACS_peak_35226	330.99	755	NM_177395	Map3k9	330.99	9.31	27.96	338372	E130314H24Rik|Mlk1|Prke1
chr19	30174990	30175441	MACS_peak_71165	330.81	451	NM_138595	Gldc	330.81	5.39	28.98	104174	D030049L12Rik|D19Wsu57e
chr6	101150523	101152068	MACS_peak_133670	330.5	1545	NM_018884	Pdzrn3	330.5	7.67	27.91	55983	1110020C07Rik|AI429718|AL023082|LNX3|SEMACAP3|Semcap3
chr17	26508132	26508519	MACS_peak_78994	330.24	387	ENSMUST00000025025	Dusp1	330.24	11.49	21.18	19252	3CH134|MKP1|Ptpn16|U19515|erp|mkp-1
chr10	62539289	62539984	MACS_peak_17543	330.14	695	uc007fhj.1	2510003E04Rik	330.14	16.94	21.17	NA	NA
chr18	34220923	34221276	MACS_peak_74384	329.63	353	ENSMUST00000171187	Apc	329.63	5.19	27.98	11789	AI047805|AU020952|AW124434|CC1|Min|mAPC
chr19	4097181	4097507	MACS_peak_78458	329.44	326	ENSMUST00000025779	Cdk2ap2	329.44	10.12	28	52004	5830466O21Rik|D19Ertd144e|Doc-1r
chr1	167284775	167285099	MACS_peak_9473	328.85	324	NM_030724	Uck2	328.85	8.6	28.01	80914	AA407809|AI481316|AU018180|AU020720|TSA903|UK|UMK|Umpk
chr18	35650674	35652153	MACS_peak_86560	328.84	1479	NM_001270646	Prob1	328.84	23.54	21.19	381148	Gm1614
chr4	116463735	116464183	MACS_peak_129108	327.43	448	ENSMUST00000106485	Mast2	327.43	7.15	21.26	17776	MAST205|Mtssk
chr1	54647267	54647772	MACS_peak_3456	327.39	505	NM_001081433	Ankrd44	327.39	9.59	21.26	329154	4930444A19Rik|A130096K20|E130014H08Rik|PP6-ARS-B
chr5	23778072	23778496	MACS_peak_116672	326.9	424	NM_178403	Pus7	326.9	5.7	28.11	78697	C330017I15Rik
chr7	3414838	3415648	MACS_peak_136988	326.83	810	ENSMUST00000182222	Cacng8	326.83	14.2	28.12	81905	-
chr6	66896548	66896989	MACS_peak_131287	326.28	441	ENSMUST00000114222	Gng12	326.28	8.82	28.16	14701	2010305F15Rik|AA536815|AI115529|AI314170|AI842738
chr13	117602358	117603095	MACS_peak_52027	326.15	737	NM_010408	Hcn1	326.15	13.77	21.3	15165	Bcng1|C630013B14Rik|HAC2
chr8	27120765	27121874	MACS_peak_173805	326.12	1109	NM_054044	Adgra3	326.12	20.35	21.29	70693	3830613O22Rik|AU044632|Gpr125|Tem5-like
chr15	40655041	40655583	MACS_peak_63202	325.8	542	NM_011766	Zfpm2	325.8	8.44	21.28	22762	B330005D23Rik|FOG-2|FOG2
chrX	20848565	20849616	MACS_peak_167185	325.75	1051	ENSMUST00000122312	Araf	325.75	12.7	28.16	11836	1200013E08Rik|A-Raf|AW495444|Araf1
chr7	139007303	139007801	MACS_peak_170802	325.62	498	NM_028708	Jakmip3	325.62	6.87	21.27	74004	6330417G02Rik|AI593226|mKIAA4091
chr15	82015881	82016693	MACS_peak_50520	325.39	812	uc007wxy.1	Xrcc6	325.39	9.88	29.21	14375	70kDa|G22p1|Ku70
chr2	156311845	156312402	MACS_peak_93171	324.07	557	NM_020255	Scand1	324.07	5.15	28.28	19018	2310003H23Rik|Leap1|PGC-2|Ppargc2
chrX	159255781	159256188	MACS_peak_151466	323.42	407	NM_148945	Rps6ka3	323.42	9.96	29.29	110651	MAPKAPK-1b|MPK-9|Rsk2|S6K-alpha3|p90RSK3|pp90RSK2
chr7	47091246	47091570	MACS_peak_162426	323.16	324	uc009haa.2	Ptpn5	323.16	6.82	21.39	19259	Step
chr10	70097120	70097581	MACS_peak_15370	323.12	461	NM_001111121	Ccdc6	323.12	13.16	28.37	76551	2810012H18Rik|AA536681|AA960498|AW061011
chr3	88568080	88569725	MACS_peak_88483	323.11	1645	NM_033526	Ubqln4	323.11	6.39	29.29	94232	A1Up|A1u|AI663987|CIP75|UBIN
chr17	46501799	46502247	MACS_peak_69452	322.03	448	uc008ctd.1	Cul9	322.03	7.3	28.42	78309	1810035I07Rik|Cul-9|Parc|mKIAA0708
chr1	87406819	87407201	MACS_peak_5930	321.24	382	uc007bwv.1	Gigyf2	321.24	5.27	21.43	227331	2610016F01Rik|A830080H02Rik|AI852361|AW259676|BC006835|Tnrc15|mKIAA0642
chr12	55213839	55215129	MACS_peak_29890	320.95	1290	NM_028527	Fam177a	320.95	7.06	29.36	73385	1700047I17Rik|1700047I17Rik1|C14orf24|D730001C10Rik|Fam177a1
chr9	63377122	63377902	MACS_peak_188037	320.67	780	ENSMUST00000034920	Map2k5	320.67	8.22	21.41	23938	AI324775|AI428457|MEK5|Mapkk5|Prkmk5
chr12	16576947	16577255	MACS_peak_36154	320.35	308	NM_015763	Lpin1	320.35	9.22	21.43	14245	4631420P06|Kiaa0188|Lipin1|fld|mKIAA0188
chr2	160364469	160367065	MACS_peak_83328	319.68	2596	NM_010658	Mafb	319.68	11.74	29.28	16658	Kreisler|Krml|Krml1|kr
chr5	134702632	134703824	MACS_peak_125713	319.57	1192	NM_007925	Eln	319.57	14.33	28.52	13717	AI385707|AI480567|E030024M20Rik
chr11	97688822	97690358	MACS_peak_24445	319.55	1536	NM_009545	Pcgf2	319.55	10.46	29.25	22658	Mel18|Rnf110|Zfp144|mel-18
chrX	142351378	142351908	MACS_peak_197582	319.08	530	NM_207625	Acsl4	319.08	10.62	21.52	50790	9430020A05Rik|ACS4|AU018108|Facl4|Lacs4
chr11	83418464	83421037	MACS_peak_26404	318.03	2573	uc007kow.1	Rasl10b	318.03	6.45	28.66	276952	B230331P10Rik|Gm729|VTS58635
chr2	107294928	107295898	MACS_peak_89392	317.6	970	NM_021275	Kcna4	317.6	8.74	28.63	16492	Kv1.4
chr4	125052403	125052855	MACS_peak_111447	317.36	452	NM_145552	Gnl2	317.36	7.24	28.61	230737	BC003262|HUMAUANTIG|Ngp-1
chr5	115997673	115998052	MACS_peak_123293	317.12	379	uc008zeu.1	Cit	317.12	10.67	28.62	12704	C030025P15Rik|CRIK|CRIK-SK|Cit-k
chr11	116437993	116438619	MACS_peak_29698	316.87	626	NM_176902	Ubald2	316.87	10.31	28.61	319370	1110014K08Rik|D030012E24Rik|Fam100b
chr19	5080634	5083101	MACS_peak_91413	316.75	2467	NM_001001885	Tmem151a	316.75	8.73	21.62	381199	AW125688|Gm961|Tmem151
chr3	89339152	89339953	MACS_peak_116528	316.6	801	uc008pyv.1	Adam15	316.6	6.88	21.64	11490	AD56|MDC15
chrX	159627271	159627691	MACS_peak_170737	316.5	420	NM_001135727	Sh3kbp1	316.5	10.45	28.69	58194	1200007H22Rik|1700125L08Rik|5830464D22Rik|AI447724|Cin85|IN85|Ruk|Seta
chr17	31527309	31528401	MACS_peak_79761	315.57	1092	NM_030087	Ndufv3	315.57	7.77	21.67	78330	1500032D16Rik
chr4	140246301	140246811	MACS_peak_132308	315.55	510	NM_198610	Igsf21	315.55	6.5	21.67	230868	BC055811|Gm141
chr4	139963795	139964251	MACS_peak_132226	315.45	456	NM_173427	Klhdc7a	315.45	17.09	21.68	242721	B230308G19Rik
chr7	25242985	25245531	MACS_peak_160555	315.45	2546	NM_010155	Erf	315.45	14.01	21.67	13875	-
chr12	108554719	108555213	MACS_peak_37484	315.03	494	NM_007965	Evl	315.03	6.35	28.7	14026	AI528774
chr5	43233462	43235088	MACS_peak_118559	314.75	1626	NM_175937	Cpeb2	314.75	4.5	28.67	231207	A630055H10Rik|Cpe-bp2
chr1	184845545	184845845	MACS_peak_12667	313.85	300	NM_133684	2022-03-02	313.85	6.47	21.7	67247	2810484M10Rik|Mosc2|mARC1
chr18	12190129	12190590	MACS_peak_73160	313.85	461	NM_008720	Npc1	313.85	12.38	28.69	18145	A430089E03Rik|C85354|D18Ertd139e|D18Ertd723e|lcsd|nmf164|spm
chrX	134689216	134696466	MACS_peak_169785	313.43	7250	NM_001202500	Armcx4	313.43	11.98	28.69	100503043	AI448196|Gm195
chr9	60712988	60713405	MACS_peak_187811	313.38	417	ENSMUST00000038407	Larp6	313.38	11.11	21.71	67557	5430431G03Rik|AI552438|Achn
chr17	69383839	69384225	MACS_peak_63091	313.38	386	ENSMUST00000112676	Zbtb14	313.38	17.77	29.46	22666	ZF5|Zfp161|b2b1982Clo
chr9	37656997	37657312	MACS_peak_141619	313.32	315	NM_025289	Tbrg1	313.32	8.76	29.45	21376	AA408552|AA409675|Niam|Tb-5|mFLJ00213
chr4	122871396	122871813	MACS_peak_129809	313.04	417	uc012dkr.1	Cap1	313.04	5.77	21.72	12331	-
chr7	112427781	112428100	MACS_peak_128514	312.98	319	NM_020606	Parva	312.98	7.55	29.45	57342	2010012A22Rik|5430400F08Rik|AI225929|AU042898|Actp|CH-ILKBP|Parvin
chr13	46727359	46727940	MACS_peak_47305	312.65	581	ENSMUST00000021803	Nup153	312.65	7.16	21.71	218210	B130015D15Rik|C88147
chr4	137594139	137594516	MACS_peak_100351	312.65	377	ENSMUST00000105840	Usp48	312.65	8.15	29.47	170707	2810449C13Rik|AI115503|BC021769|D330022K21Rik|Usp31
chr12	33249850	33250763	MACS_peak_37438	312.47	913	NM_028139	Atxn7l1	312.47	13.2	21.72	380753	2810423G08Rik|Atxn7l4
chr11	62373075	62373622	MACS_peak_28124	312	547	NM_001252313	Ncor1	312	7.72	21.72	20185	5730405M06Rik|A230020K14Rik|N-CoR|RIP13|Rxrip13|mKIAA1047
chr1	155558119	155558859	MACS_peak_9938	311.9	740	NM_026683	Acbd6	311.9	6.6	21.7	72482	0610010G04Rik|2610100E10Rik
chr10	82985496	82985982	MACS_peak_16790	311.39	486	NM_021439	Chst11	311.39	10.88	28.87	58250	1110020P09Rik|C4ST|C4ST-1|C4ST1|C4s
chr11	98836784	98837673	MACS_peak_24585	310.92	889	NM_001080925	Rapgefl1	310.92	5.57	29.62	268480	B230105J10
chr9	22057803	22058386	MACS_peak_183722	310.45	583	NM_177318	Zfp653	310.45	7.17	21.75	319601	E430039K05Rik|Znf653
chr6	137380173	137380647	MACS_peak_136209	309.17	474	NM_011216	Ptpro	309.17	5.13	28.82	19277	D28|GLEPP1|PTPBK|PTPROt|PTPU2|PTPoc|PTPphi|Ptpn15|R-PTP-O
chr16	31274845	31275277	MACS_peak_54840	308.84	432	NM_025800	Ppp1r2	308.84	4.66	29.58	66849	0610025N14Rik|2310007G06Rik|4930440J04Rik|5430408E15Rik|D16Ertd248e|IPP-2
chr11	72607260	72607635	MACS_peak_22054	308.39	375	NM_025985	Ube2g1	308.39	11.47	29.56	67128	2700059C12Rik|AI256795|AU014992|AW552068|D130023C12Rik
chr3	107748044	107749169	MACS_peak_101345	307.6	1125	uc008qxn.1	Csf1	307.6	4.98	28.86	12977	C87615|Csfm|MCSF|op
chr10	62838175	62840378	MACS_peak_17602	307.27	2203	NM_027384	Tet1	307.27	7.46	21.97	52463	2510010B09Rik|AA517754|BB001228|Cxxc6|D10Ertd17e|LCX|mKIAA1676
chr4	155345449	155345789	MACS_peak_102315	306.83	340	NM_001039079	Prkcz	306.83	8.77	29.58	18762	AI098070|C80388|Pkcz|R74924|aPKCzeta|nPKC-zeta|zetaPKC
chr15	96369919	96372762	MACS_peak_58190	306.81	2843	NM_175251	Arid2	306.81	10.39	28.87	77044	1700124K17Rik|4432409D24Rik|zipzap/p200
chr8	12757013	12757352	MACS_peak_148358	306.65	339	ENSMUST00000033818	Atp11a	306.65	10.55	28.91	50770	4930558F19Rik|AU040868|Atpc1h|Ih
chr19	24476347	24477474	MACS_peak_70820	306.6	1127	NM_026520	Fam122a	306.6	7.23	29.56	68034	2410124L17Rik|2900009I07Rik|ENSMUSG00000051082|Gm9849
chr1	183135354	183135876	MACS_peak_9456	306.59	522	NM_026866	Disp1	306.59	13.48	29.55	68897	1190008H24Rik|DispA
chr4	120131721	120132629	MACS_peak_98381	305.62	908	NM_010657	Hivep3	305.62	6.08	29.6	16656	2900056N03Rik|A130075N07|AI848000|E030045D18Rik|KBP-1|KBP1|Krc|Rc|Schnurri-3|Shn3|Zas3
chr4	42612829	42613253	MACS_peak_93882	304.89	424	NM_011335	Ccl21b	304.89	6.39	29.56	100042493	6CKBAC1|6Ckine|AI159701|CKb9|SLC|Scya21|Scya21a|TCA4
chr6	35539538	35539888	MACS_peak_115001	304.76	350	NM_008098	Mtpn	304.76	8.26	29.55	14489	5033418D15Rik|Gcdp|V1
chr8	47287879	47289402	MACS_peak_150891	304.71	1523	NM_001114311	Stox2	304.71	5.28	29.18	71069	4933409N07Rik|AI449080|AI835114|mKIAA1392
chr9	44842532	44842916	MACS_peak_160311	303.88	384	NM_001081049	Kmt2a	303.88	5.7	29.31	214162	6430520K01|ALL-1|All1|Cxxc7|HRX|HTRX1|Mll|Mll1|mKIAA4050
chr3	135439166	135439798	MACS_peak_102536	303.8	632	uc008rlq.1	Ube2d3	303.8	5.44	29.28	66105	1100001F19Rik|9430029A22Rik|AA414951
chrX	53669176	53670408	MACS_peak_148987	303.5	1232	NM_001018063	Cxx1b	303.5	6.35	29.89	553127	Mart8c
chr17	83350930	83351239	MACS_peak_71857	302.79	309	NM_199466	Eml4	302.79	13.02	29.4	78798	4930443C24Rik|AI644019
chr1	87509899	87510215	MACS_peak_4389	302.6	316	ENSMUST00000166055	Neu2	302.6	8.18	29.95	23956	MBS|MSS|MTS
chr11	61489686	61491686	MACS_peak_21172	302.58	2000	uc007jht.1	Mapk7	302.58	6.65	29.93	23939	BMK-1|BMK1|ERK-5|ERK5|Erk5-T|PRKM7
chr6	120958240	120960038	MACS_peak_157352	302.56	1798	NM_001270475	Mical3	302.56	4.85	22.18	194401	C130040D16Rik|Mical-3|mKIAA1364
chr9	110380971	110381485	MACS_peak_146873	302.15	514	NM_001001144	Scap	302.15	5.92	29.88	235623	9530044G19|mKIAA0199
chr10	62269059	62270056	MACS_peak_13070	301.87	997	NM_010438	Hk1	301.87	4.01	29.9	15275	BB404130|Hk-1|Hk1-s|dea|mHk1-s
chr2	30972859	30973301	MACS_peak_98434	301.38	442	NM_144885	BC005624	301.38	5.56	22.22	227707	-
chr16	12267423	12268200	MACS_peak_60280	300.87	777	NM_028277	Shisa9	300.87	7.52	29.55	72555	2700045P11Rik|Ckamp44
chr11	76027427	76027782	MACS_peak_29491	300.62	355	NM_029658	Fam101b	300.62	14.48	22.28	76566	1500005K14Rik|RefilinB|cfm
chr18	61696836	61697976	MACS_peak_67640	300.57	1140	NM_172832	Pcyox1l	300.57	8.22	29.93	240334	BC060677|C630049M13
chr5	138194491	138195513	MACS_peak_112118	300.33	1022	NM_177878	Mblac1	300.33	12.17	29.9	330216	-
chr15	61987421	61988278	MACS_peak_54884	300.26	857	uc007vyi.1	Myc	300.26	6.84	29.55	17869	AU016757|Myc2|Niard|Nird|bHLHe39
chr7	105752988	105756069	MACS_peak_128111	300.13	3081	NM_001162943	Dchs1	300.13	5.25	29.88	233651	3110041P15Rik|C130033F22Rik|CDH25|FIB1|Gm165|PCDH16
chr6	125053489	125053891	MACS_peak_135470	300	402	NM_016845	Acrbp	300	13.16	29.59	54137	OY-TES-1|sp32
chr11	3516260	3517240	MACS_peak_23542	299.89	980	uc007htc.1	Selm	299.89	9.09	22.31	114679	1500040L08Rik|A230103K18|Sepm
chr11	107670034	107670671	MACS_peak_25572	299.83	637	NM_198298	Helz	299.83	9.84	29.87	78455	3110078M01Rik|9430093I07Rik|9630002H22Rik|AI851979|DRHC
chr12	53149285	53150576	MACS_peak_33354	299.69	1291	NM_198111	Akap6	299.69	9.35	29.57	238161	AI482140|Akapalpha|Akapbeta|PRKA
chr15	57821031	57823751	MACS_peak_64042	299.5	2720	NM_199449	Zhx2	299.5	12.79	22.32	387609	Afr-1|Afr1|Raf|mKIAA0854
chr17	87975049	87975405	MACS_peak_72324	299.43	356	NM_010830	Msh6	299.43	13.33	29.61	17688	AU044881|AW550279|GTBP|Gtmbp
chr1	10037661	10038159	MACS_peak_459	299.35	498	uc033fib.1	Cops5	299.35	8.58	22.33	26754	AI303502|CSN5|Jab1|Mov34|Sgn5
chr11	8433735	8434638	MACS_peak_24059	298.9	903	NM_001083587	Tns3	298.9	6.05	22.37	319939	BC023928|F830010I22Rik|TEM6|Tens1
chr17	34592262	34592774	MACS_peak_80131	298.85	512	ENSMUST00000038149	Pbx2	298.85	15.63	22.36	18515	AU043397|G17
chr18	34862464	34864805	MACS_peak_65944	298.81	2341	NM_007913	Egr1	298.81	7.03	29.96	13653	A530045N19Rik|ETR103|Egr-1|Krox-1|Krox-24|Krox24|NGF1-A|NGFI-A|NGFIA|TIS8|Zenk|Zfp-6|Zif268|egr
chr7	108934414	108934807	MACS_peak_128155	298.68	393	NM_025344	Eif3f	298.68	4.99	29.97	66085	0610037M02Rik|AA409853|Eif3s5
chr5	114364017	114365866	MACS_peak_123018	298.43	1849	NM_026145	Kctd10	298.43	7.41	29.47	330171	AW536343|C87062|mBACURD3
chr11	116918862	116919543	MACS_peak_26433	298.22	681	NM_172948	Mgat5b	298.22	5.6	30.02	268510	C330018B01|GnT-IX|mGnTVB
chr4	137728874	137729861	MACS_peak_100382	298.09	987	NM_029563	Rap1gap	298.09	5.52	30.04	110351	1300019I11Rik|2310004O14Rik|AI427470|ARPP-90|Gap|Rap1GAP1|Rap1ga1
chr9	72979743	72980196	MACS_peak_189151	298.05	453	NM_001198789	Ccpg1os	298.05	12.06	22.36	546143	EG546143|Gm5918
chrX	8175710	8176051	MACS_peak_193602	298.05	341	NM_172478	Tbc1d25	298.05	13.16	22.36	209815	6330576A08Rik|DXHXS7927e|Oatl1
chr17	25015430	25015782	MACS_peak_60067	297.89	352	uc029tbe.1	Cramp1l	297.89	8.35	30.05	57354	5830477H08Rik|AI256853|AI790734|Cramp1|Tce4|mKIAA1426
chr12	31487185	31488303	MACS_peak_32407	297.66	1118	NM_134048	Cbll1	297.66	6.45	29.52	104836	AI467391|Hakai|c-Cbl-like
chr2	84677850	84678174	MACS_peak_102673	297.52	324	NM_025868	Tmx2	297.52	6.11	22.35	66958	2310042M24Rik|AA589631|Txndc14
chr9	110052047	110053522	MACS_peak_146813	297.45	1475	uc009rtd.2	Map4	297.45	4.99	30.06	17758	AA407148|MAP-4|Mtap-4|Mtap4
chr13	104631362	104631738	MACS_peak_51129	296.96	376	NM_026072	Cwc27	296.96	8.03	22.38	67285	3110009E13Rik|NY-CO-10|Sdccag10
chr7	89980411	89980983	MACS_peak_126738	296.93	572	ENSMUST00000107234	Eed	296.93	9.08	30.09	13626	ENSMUSG00000039373|l(7)5Rn|l7Rn5|lusk
chr4	130018660	130019280	MACS_peak_99503	296.21	620	NM_173071	Adgrb2	296.21	8.72	30.16	230775	Bai2
chr12	5375101	5375682	MACS_peak_31110	296.03	581	NM_001164493	Klhl29	296.03	8.64	29.66	208439	A230106N14Rik|Gm68|Kbtbd9|mKIAA1921
chr16	18224217	18225215	MACS_peak_60830	295.91	998	NM_172151	Zdhhc8	295.91	4.89	29.66	27801	D16H22S1738E|DHHC-8|E330009O14Rik|Op53c05|ZDHHCL1
chr4	151995825	151996258	MACS_peak_101903	295.77	433	ENSMUST00000055688	Phf13	295.77	10.96	30.13	230936	BC029632|Phf5|SPOC1
chr1	180862357	180862841	MACS_peak_10535	295.6	484	NM_145943	Sde2	295.6	9.96	29.66	208768	-
chr5	122264149	122264460	MACS_peak_124045	295.48	311	NM_001039153	Tctn1	295.48	16.89	29.64	654470	G730031O11Rik|Tect1
chr9	44379622	44379937	MACS_peak_160241	295.27	315	ENSMUST00000160902	Hyou1	295.27	14.39	29.65	12282	AI415631|CBP-140|Cab140|Grp170|Orp150
chr1	75505212	75506452	MACS_peak_5188	294.08	1240	NM_178884	Obsl1	294.08	9.67	22.35	98733	AW822216
chr12	116281221	116281672	MACS_peak_38062	293.83	451	NM_028731	Esyt2	293.83	11.22	29.71	52635	2410017M09Rik|4921504I16Rik|CHR2SYT|D12Ertd551e|Fam62b
chr9	101074726	101075420	MACS_peak_145935	293.49	694	ENSMUST00000085177	Msl2	293.49	5.82	30.23	77853	E130103E02Rik|Msl2l1|Rnf184
chr18	73572846	73573776	MACS_peak_77243	292.94	930	NM_001039214	Mex3c	292.94	5.84	29.72	240396	A130001D14Rik|BC035207|BM-013|Rkhd2
chr11	97149361	97149712	MACS_peak_31862	292.61	351	NM_198100	Tbkbp1	292.61	4.89	22.45	73174	3110043L15Rik|ProSAPiP2|SINTBAD
chr19	59075454	59076038	MACS_peak_73189	292.48	584	NM_175172	4930506M07Rik	292.48	8.59	30.32	NA	NA
chr14	8297488	8298797	MACS_peak_52421	292.12	1309	NM_183187	Fam107a	292.12	10.48	22.44	268709	DRR1
chr1	79703631	79704241	MACS_peak_4495	291.97	610	NM_001111279	Wdfy1	291.97	15.25	29.73	69368	1700013B03Rik|1700120F24Rik|FENS-1|Jr1|WDF1|ZFYVE17|mKIAA1435
chr2	164967982	164968454	MACS_peak_109656	291.88	472	ENSMUST00000099092	Slc12a5	291.88	9.61	22.44	57138	KCC2|mKIAA1176
chr5	98854438	98855422	MACS_peak_121391	291.02	984	NM_173404	Bmp3	291.02	21.59	29.87	110075	9530029I04Rik
chr11	77137005	77138295	MACS_peak_29679	290.97	1290	NM_176965	Efcab5	290.97	10.6	22.47	319634	4930563A03Rik
chr10	72309224	72309791	MACS_peak_13627	290.9	567	ENSMUST00000061324	Gm9923	290.9	8.27	30.33	100040505	ENSMUSG00000053830
chr1	97024910	97025834	MACS_peak_6675	290.84	924	ENSMUST00000054664	Gm6430	290.84	11.33	22.45	623430	EG623430|ENSMUSG00000044757
chr3	154733321	154733626	MACS_peak_120872	290.57	305	NM_175176	Erich3	290.57	12.71	22.45	209601	1700013E18Rik|4922501L14Rik|5031409G23Rik|AI596448|Gm133
chr18	59408883	59409759	MACS_peak_67473	290.49	876	NM_001081328	Chsy3	290.49	17.65	30.33	78923	4833446K15Rik|AI662215
chr2	90757335	90757686	MACS_peak_102841	290.33	351	NM_018828	Fnbp4	290.33	5.95	22.43	55935	FBP30|Fnbp30|mKIAA1014
chr9	48831742	48833099	MACS_peak_142547	289.96	1357	NM_001033324	Zbtb16	289.96	7.06	30.34	235320	AI467657|PLZF|Zfp145|lu
chr1	39535553	39536337	MACS_peak_2704	289.56	784	uc007ati.1	Cnot11	289.56	11.34	22.51	52846	2410015L18Rik|C40|D1Bwg0212e
chr2	156144232	156144589	MACS_peak_93143	289.31	357	NM_025946	Romo1	289.31	6.36	29.84	67067	2010100O12Rik|AI853864
chr11	21370186	21370879	MACS_peak_18603	289.2	693	uc007ids.3	Ugp2	289.2	11.8	30.32	216558	UDPGP|UGPase
chr3	95134087	95134996	MACS_peak_100207	289.2	909	NM_153121	Lysmd1	289.2	11.85	29.86	217779	2610022K04Rik|AI415311
chr7	15987478	15989440	MACS_peak_137442	288.7	1962	NM_001081418	Gltscr1	288.7	8.47	29.85	243842	-
chr4	124657648	124660592	MACS_peak_98705	288.66	2944	NM_011141	Pou3f1	288.66	4.08	30.43	18991	Oct-6|Oct6|Otf-6|Otf6|Scip|Test1|Tst-1|Tst1
chr3	89754825	89756370	MACS_peak_116605	288.53	1545	NM_009602	Chrnb2	288.53	12.4	22.52	11444	Acrb-2|Acrb2|C030030P04Rik|[b]2-nAchR
chr15	90643322	90643713	MACS_peak_67295	286.88	391	NM_001033851	Cpne8	286.88	11.62	22.58	66871	1200003E11Rik|1500031E20Rik
chr16	23889580	23889941	MACS_peak_71129	286.77	361	NM_009215	Sst	286.77	3.89	22.59	20604	SOM|SRIF|SS|Smst
chr11	69846643	69847075	MACS_peak_21839	286.74	432	uc007jsa.2	Plscr3	286.74	10.94	30.45	70310	2210403O21Rik|2610037N06Rik|ESTM3|X83310
chr15	84804759	84805110	MACS_peak_57128	286.68	351	NM_001081166	Phf21b	286.68	9.65	29.84	271305	A730032D07Rik
chr18	46607503	46608080	MACS_peak_87831	286.24	577	NM_010120	Eif1a	286.24	6.92	22.6	13664	C76390|Ef1a|Eftu|Eif4c|eIF-1A|eIF-4C
chr1	72851997	72852474	MACS_peak_3572	286.2	477	ENSMUST00000047328	Igfbp2	286.2	3.96	30.52	16008	AI255832|IBP-2|Igfbp-2|mIGFBP-2
chr16	31956938	31958335	MACS_peak_71671	286.14	1397	NM_026554	Ncbp2	286.14	9.36	22.6	68092	20kDa|5930413E18Rik|AA536802|AI843301|C79367
chr12	32378788	32380149	MACS_peak_37353	286.12	1361	NM_001162903	Ccdc71l	286.12	7.58	22.59	72123	2010109K11Rik|AV375874
chr11	16257723	16258086	MACS_peak_24222	285.82	363	NM_145967	Vstm2a	285.82	8.66	22.58	211739	Vstm2
chr9	51008740	51009073	MACS_peak_142701	285.23	333	NM_178710	Sik2	285.23	11.62	30.6	235344	G630080D20Rik|Snf1lk2
chr11	85825201	85826001	MACS_peak_30960	285.03	800	NM_138681	Bcas3	285.03	11.04	22.6	192197	1500019F07Rik|2610028P08Rik|AU021018|BC028339|K20D4|rudhira
chr4	98115229	98116216	MACS_peak_108950	284.8	987	NM_010905	Nfia	284.8	11.88	29.9	18027	1110047K16Rik|9430022M17Rik|CTF|NF1-A|NF1A
chr13	58113141	58113592	MACS_peak_37129	284.52	451	ENSMUST00000160860	Klhl3	284.52	9.3	30.62	100503085	7530408C15Rik|AI430941|EG627648
chr6	92174077	92175208	MACS_peak_154805	284.03	1131	NM_025578	Mrps25	284.03	8.06	22.63	64658	2810429N01Rik|Rpms25
chr7	16614471	16614993	MACS_peak_137575	283.91	522	NM_172739	Arhgap35	283.91	7.28	29.88	232906	6430596G11Rik|AI841135|Grlf1|mKIAA1722|p190A|p190RhoGAP
chr7	45013479	45013973	MACS_peak_123930	283.88	494	uc009gsr.1	Scaf1	283.88	8.29	30.59	233208	AI480556|SR-A1
chr18	61310562	61311071	MACS_peak_76309	283.79	509	NM_133249	Ppargc1b	283.79	9.21	29.87	170826	4631412G21Rik|Perc
chr15	100936270	100936600	MACS_peak_52339	283.73	330	NM_011323	Scn8a	283.73	7.41	30.6	20273	AI853486|C630029C19Rik|NaCh6|Nav1.6|dmu|med|mnd-2|mnd2|nmf2|nmf335|nmf58|nur14|seal
chr19	45023541	45024204	MACS_peak_72081	283.6	663	NM_145503	Lzts2	283.6	5.61	30.62	226154	BC014695|LAPSER1|mKIAA1813
chr8	105696664	105698328	MACS_peak_154536	283.53	1664	uc009ndq.1	Acd	283.53	7.89	29.86	497652	-
chr1	135371056	135371996	MACS_peak_9039	283.18	940	ENSMUST00000041240	Shisa4	283.18	5.04	22.66	77552	9330132O05Rik|Tmem58|mShisa4
chr10	80586514	80587030	MACS_peak_16440	283.01	516	NM_145421	Abhd17a	283.01	6.61	29.87	216169	1700013O15Rik|BC005632|D10Bwg1364e|Fam108a
chr12	82425012	82425455	MACS_peak_35329	282.95	443	NM_172579	Sipa1l1	282.95	6.85	29.89	217692	4931426N11Rik|AW213287|Spar|mKIAA0440
chr8	124860746	124861271	MACS_peak_139095	282.59	525	uc009nxt.2	2810004N23Rik	282.59	3.51	30.61	66523	3110004G14Rik|Ayu21-55|Gt(pU21)55Imeg|GtAyu21-55
chr1	43749635	43750085	MACS_peak_2444	282.19	450	ENSMUST00000126008	Uxs1	282.19	20.07	29.97	67883	1600025I13Rik|AI451869|AI649125|AW550562
chr4	152271473	152271855	MACS_peak_133767	281.87	382	NM_133348	Acot7	281.87	5.5	22.73	70025	2410041A17Rik|Ach1|Act|Bach|CTE-IIa|Cte-II|Lach1
chr12	24660182	24660883	MACS_peak_36757	281.78	701	NM_178357	Klf11	281.78	11.4	22.73	194655	9830142A17|D12Ertd427e|Tieg2|Tieg2b|Tieg3
chr14	19977145	19977627	MACS_peak_40828	281.55	482	ENSMUST00000159073	Gng2	281.55	7.9	30.6	14702	-
chr10	127059397	127060184	MACS_peak_19844	281.11	787	NM_001033262	2022-03-09	281.11	13	30.04	216438	AI608492|BC019560
chr17	15826011	15826586	MACS_peak_59667	281.08	575	NM_178615	Rgmb	281.08	10.42	30.6	68799	1110059F19Rik|DRAGON
chr3	89401968	89403301	MACS_peak_88623	281.05	1333	ENSMUST00000129308	Flad1	281.05	8.91	30.59	319945	A930017E24Rik|Pp591
chr2	9951113	9953058	MACS_peak_83169	281.02	1945	ENSMUST00000114909	Taf3	281.02	8.65	30.07	209361	140kDa|4933439M23Rik|AW539625|TAF140|TAFII-140|TAFII140|mTAFII140
chr3	87525606	87526049	MACS_peak_88348	280.93	443	uc008psj.2	Etv3	280.93	10.89	30.58	27049	AI414410|METS|Pe1
chr6	72615523	72616449	MACS_peak_153084	280.56	926	NM_009443	Tgoln1	280.56	8.43	22.75	22134	AU015504|D6Ertd384e|TGN38|TGN38A|Ttgn1
chr10	127171615	127172340	MACS_peak_17476	280.23	725	NM_008080	B4galnt1	280.23	5.81	30.63	14421	4933429D13Rik|Gal-NAc-T|GalNAc-T|GalNAcT|Galgt1|Ggm-2|Ggm2
chr9	45752688	45753656	MACS_peak_186227	279.85	968	NM_001081270	Dscaml1	279.85	4.6	22.77	114873	4921507G06Rik|4930435C18Rik|BB239540|mKIAA1132
chr2	32278804	32279131	MACS_peak_98668	279.61	327	NM_175190	Swi5	279.61	8.36	22.81	72931	1500019F05Rik|2900010J23Rik|AI046671
chr18	80256306	80257118	MACS_peak_90647	279.46	812	uc008fsy.2	Pqlc1	279.46	7.75	22.81	66943	2310009N05Rik|4933425L21Rik|5730564E11Rik|C78974
chr10	103214833	103216112	MACS_peak_21307	279.01	1279	NM_029134	Lrriq1	279.01	11.45	22.82	74978	4930503E15Rik|Gm1557
chr11	102604430	102604920	MACS_peak_28166	279.01	490	NM_020510	Fzd2	279.01	8.51	30.05	57265	AL033370|AW456835|Fz10|Fzd10|Mfz10|Mfz10a
chr19	8941874	8942382	MACS_peak_91922	278.77	508	ENSMUST00000096240	Mta2	278.77	6.76	22.83	23942	AW550797|Mata1l1|Mta1l1|mmta2
chr8	86884821	86885258	MACS_peak_136269	278.67	437	NM_030563	N4bp1	278.67	6.45	30.56	80750	AI481586|C81621
chr8	102661600	102662189	MACS_peak_179083	278.09	589	uc009mzv.1	Cdh11	278.09	11.17	22.86	12552	Cad11|OSF-4
chr17	56445847	56447470	MACS_peak_62395	278.04	1623	uc008dcd.2	Ptprs	278.04	9.42	30.59	19280	AL022616|PTP|PTP-NU3|PTPNU-3|PTPsigma|Ptpt9|R-PTP-S|RPTPsigma
chr19	47579677	47580343	MACS_peak_72452	276.62	666	ENSMUST00000026043	Slk	276.62	6.46	30.94	20874	9A2|AV021402|AW411554|Etk4|SMAK|Stk2|mKIAA0204|mSLK
chr11	28583281	28584308	MACS_peak_21447	275.97	1027	NM_181577	Ccdc85a	275.97	9.47	30.35	216613	-
chr6	121412507	121413616	MACS_peak_157447	275.32	1109	NM_001033354	Iqsec3	275.32	7.67	23.03	243621	AK122446|BRAG3|mKIAA1110|synarfGEF
chr5	145129528	145130375	MACS_peak_147538	275.23	847	NM_001033313	Pdap1	275.23	3.51	23.06	231887	HASPP28|PAP|PAP1
chr7	68230444	68231168	MACS_peak_141515	275.18	724	NM_010513	Igf1r	275.18	12.37	30.36	16001	A330103N21Rik|CD221|D930020L01|IGF-1R|hyft
chr1	34579223	34579613	MACS_peak_1350	275.11	390	ENSMUST00000062557	1700101I19Rik	275.11	11.51	31.09	73589	-
chr5	77280702	77281543	MACS_peak_140356	274.95	841	NM_011263	Rest	274.95	7.92	23.03	19712	2610008J04Rik|AA407358|NRSF|REST4
chr19	23945709	23949597	MACS_peak_70770	274.95	3888	NM_177034	Apba1	274.95	2.99	31.06	319924	6430513E09Rik|Lin-10|Mint|Mint1|Urop11|X11|X11alpha
chr18	39374566	39375664	MACS_peak_75121	274.85	1098	NM_175164	Arhgap26	274.85	10.72	30.38	71302	1810044B20Rik|2610010G17Rik|4933432P15Rik|AI853435|mKIAA0621
chr1	95313740	95314250	MACS_peak_6654	273.86	510	NM_026321	Fam174a	273.86	7.29	23.15	67698	2310044D20Rik|Fam174|Naa6|Tmem157
chr5	31479969	31481530	MACS_peak_136834	273.84	1561	NM_172993	Zfp512	273.84	7.74	23.15	269639	2500002M11Rik|AI450173|D230008H22|Znf512
chr8	25602283	25602736	MACS_peak_173668	273.84	453	ENSMUST00000139966	Whsc1l1	273.84	5.21	23.16	234135	6720429E03|A530023P05|AI528490|NSD3|WHISTLE
chr9	40345907	40346290	MACS_peak_159757	273.39	383	uc009ozo.1	Gramd1b	273.39	7.96	30.51	235283	3222402H23|A930008A22Rik|AI593249|mKIAA1201
chr5	117273672	117275219	MACS_peak_109679	272.41	1547	ENSMUST00000092889	Taok3	272.41	7.75	31.02	330177	2900006A08Rik|A130052D22|A430105I05Rik
chr9	121297533	121297833	MACS_peak_147628	272.15	300	uc009sda.1	Trak1	272.15	10.22	31.01	67095	2310001H13Rik|AI413908|AI467545|hyrt|mKIAA1042
chr7	128237540	128238589	MACS_peak_170011	271.55	1049	NM_146205	Armc5	271.55	9.19	23.37	233912	AW049683|BC032200
chr16	4879616	4880315	MACS_peak_52735	271.34	699	ENSMUST00000037843	Ubald1	271.34	11.94	31.09	207740	1500031H01Rik|BC013706|Fam100a
chr18	31942996	31948015	MACS_peak_65721	271.23	5019	ENSMUST00000064016	Gpr17	271.23	11.14	31.06	574402	AI853548
chr10	79554545	79554884	MACS_peak_16258	271.21	339	ENSMUST00000164895	Mier2	271.21	18.29	30.65	70427	2700087H15Rik|mKIAA1193
chr5	121817283	121818093	MACS_peak_123951	270.55	810	NM_008507	Sh2b3	270.55	12.84	30.58	16923	AI429800|Lnk
chr3	94870987	94871314	MACS_peak_100161	270.52	327	NM_172683	Pogz	270.52	10.72	30.57	229584	9530006B08Rik
chr9	103498801	103500208	MACS_peak_146145	269.96	1407	NM_178638	Tmem108	269.96	3.93	31.39	81907	AI462967|B130017P16Rik|R74726
chrX	151067012	151067451	MACS_peak_170320	269.95	439	NM_008001	Fgd1	269.95	8.23	30.61	14163	ZFYVE3
chr17	27556603	27557066	MACS_peak_60420	269.55	463	NM_016660	Hmga1	269.55	7.07	31.48	15361	AL023995|Hmga1a|Hmga1b|Hmgi|Hmgiy|Hmgy
chr11	120276057	120276873	MACS_peak_27077	269.15	816	NM_198423	Bahcc1	269.15	6.89	31.56	268515	B930044J06|BC060615
chr19	24130854	24131473	MACS_peak_79793	268.37	619	NM_011597	Tjp2	268.37	5.11	30.92	21873	ZO-2
chr13	100833100	100833427	MACS_peak_43767	268.31	327	NM_022885	Slc30a5	268.31	7.21	30.91	69048	1810010K08Rik|AF233321|ZNT5|ZTL1|ZnT-5|Zntl1
chr11	95009878	95010576	MACS_peak_27362	267.94	698	NM_146025	Samd14	267.94	7.88	30.96	217125	AI839049|AI854782|BC034054
chr6	119953649	119954316	MACS_peak_157249	267.15	667	uc009dmv.2	Wnk1	267.15	5.55	23.5	232341	6430573H23Rik|EG406236|Hsn2|Prkwnk1|mKIAA0344
chr13	69573489	69575040	MACS_peak_42336	267.11	1551	NM_175283	Srd5a1	267.11	11.26	30.95	78925	0610031P22Rik|4930435F02Rik|S5AR 1|Srd5a-1
chr5	137106839	137107708	MACS_peak_146514	267.09	869	ENSMUST00000054384	Trim56	267.09	14.53	23.51	384309	A130009K11Rik|Gm452|RNF109
chr3	89234179	89235292	MACS_peak_99849	266.54	1113	NM_183037	Trim46	266.54	5.87	30.93	360213	TRIFIC
chrX	73065380	73066810	MACS_peak_195388	266.36	1430	NM_153169	Pnma3	266.36	10.46	23.59	245468	-
chr13	24036184	24036608	MACS_peak_35167	266.2	424	NM_026825	Lrrc16a	266.2	5.33	31.63	68732	1110037D04Rik|AI425970|CARMIL|CARML1|D130057M20|Lrrc16
chr4	147940894	147942057	MACS_peak_101289	266	1163	NM_029841	2510039O18Rik	266	8.03	31.61	77034	Kiaa2013
chr10	93310751	93311159	MACS_peak_15782	265.66	408	NM_013508	Elk3	265.66	19.78	31.68	13713	D430049E23Rik|Erp|Etrp|Net|Sap-2
chrX	12079817	12080553	MACS_peak_166917	264.55	736	NM_029510	Bcor	264.55	10.93	31.11	71458	2900008C10Rik|5830466J11Rik|8430401K06Rik|BcorR|D930024N20Rik|mKIAA1575
chr2	173227737	173228343	MACS_peak_94782	264.38	606	NM_022995	Pmepa1	264.38	5.34	31.14	65112	2210418I02Rik|AW455466|Erg1.2|N4wbp4|Stag1|Tmepai
chr3	88168631	88172086	MACS_peak_88432	264.19	3455	ENSMUST00000001455	Mef2d	264.19	7.06	31.74	17261	C80750
chr6	87980420	87981482	MACS_peak_117810	264.17	1062	NM_198622	H1fx	264.17	7.61	31.73	243529	Gm461|H1.10|H1X
chr2	170347351	170347937	MACS_peak_110313	264.02	586	NM_029815	Bcas1	264.02	16.13	23.55	76960	2210416M21Rik|9030223A09Rik|AI841227|NABC1
chr10	60184488	60184908	MACS_peak_17363	263.96	420	NM_016803	Chst3	263.96	10.44	23.55	53374	C6ST|C6ST-1|GST-0
chr5	23497727	23498294	MACS_peak_103547	263.88	567	NM_026984	Kmt2e	263.88	5.82	31.74	69188	1810033J14Rik|9530077A04Rik|D230038D11Rik|Mll5|NKp44L
chr19	36917919	36919277	MACS_peak_93665	263.27	1358	NM_028263	Fgfbp3	263.27	9.63	23.55	72514	2610306H15Rik|Fgf-bp3
chr11	17051817	17052348	MACS_peak_18404	263.26	531	ENSMUST00000058159	Cnrip1	263.26	5.38	31.75	380686	1500041B16Rik|3110054C06Rik|5330437A18Rik|AI854501|C2orf32
chr9	102729267	102729578	MACS_peak_146069	262.9	311	NM_019764	Amotl2	262.9	7.84	31.76	56332	AW549739|C79691|Lccp|MASCOT|mKIAA0989
chr3	108435587	108435966	MACS_peak_101429	262.87	379	uc008qzc.2	Sars	262.87	8	31.22	20226	Sars1|Strs|serRS
chr7	127866111	127867363	MACS_peak_146235	262.55	1252	NM_146259	Zfp668	262.55	10.86	31.26	244219	BC030314|E130018B19Rik|Znf668
chr1	75142247	75142638	MACS_peak_4324	262.11	391	uc007bnr.1	Cnppd1	262.11	11.39	31.31	69171	1810031K17Rik|AU043960
chr4	133672318	133672647	MACS_peak_131402	261.95	329	NM_178698	Pigv	261.95	8.01	23.56	230801	B330013B03|D430024F16Rik
chr15	12592080	12592910	MACS_peak_61600	261.68	830	uc007vhq.1	Pdzd2	261.68	9.76	23.56	68070	4930537L06Rik|A930022H17Rik|Gm21706|Gm82|Pdzk3|mKIAA0300
chr11	69599735	69601412	MACS_peak_21804	261.63	1677	ENSMUST00000047889	Atp1b2	261.63	4.12	31.81	11932	Amog|Atpb-2
chr2	112239467	112240057	MACS_peak_89485	261.61	590	ENSMUST00000028554	Lpcat4	261.61	10.62	31.34	99010	AI505034|Agpat7|Aytl3|LPEAT2
chr15	8246905	8247255	MACS_peak_52438	260.77	350	NM_001162906	2410089E03Rik	260.77	15.16	31.41	73692	4732468D17Rik|Hug|Jbts17|b2b012Clo
chr5	24842184	24842624	MACS_peak_136065	260.72	440	ENSMUST00000030787	Rheb	260.72	7.63	23.59	19744	Rheb1
chr2	178141932	178142499	MACS_peak_95202	260.7	567	NM_028806	Phactr3	260.7	8.53	31.39	74189	1500003N10Rik|4930415A02Rik|H17739|Scapin1|Scapinin|mKIAA4224
chr3	88686343	88686750	MACS_peak_88497	260.62	407	uc008pwe.2	2810403A07Rik	260.62	5.86	31.91	74200	A430106P18Rik|AI256352|AI451678|Blom7|Kiaa0907
chr3	95762753	95766420	MACS_peak_116979	260	3667	NM_001081293	Rprd2	260	9.93	23.62	75137	2810036A19Rik|4930535B03Rik|6720469I21Rik|AL022841|AL022940|AU021304|BB077382|mKIAA0460
chr7	125878778	125881238	MACS_peak_169703	259.04	2460	NM_001101488	Gsg1l	259.04	11.19	23.64	269994	AI852434|C230098I05Rik|G630023A01Rik|Gm637|g1l
chr5	115453825	115455625	MACS_peak_109458	258.92	1800	ENSMUST00000150779	Msi1	258.92	6.48	32	17690	Msi1h|Musahi1|m-Msi-1
chr13	68999083	68999541	MACS_peak_49059	258.62	458	NM_153534	Adcy2	258.62	11.45	23.65	210044	mKIAA1060
chr10	127498368	127499384	MACS_peak_17533	258.43	1016	NM_027900	R3hdm2	258.43	9.12	31.99	71750	1300003K24Rik|AU041262|mKIAA1002
chr6	31528457	31529036	MACS_peak_128980	258.43	579	NM_013723	Podxl	258.43	6.25	31.59	27205	AW121214|Ly102|PC|PCLP-1|Pclp1
chr5	17729141	17729619	MACS_peak_115930	258.02	478	NM_013657	Sema3c	258.02	7.9	31.62	20348	1110036B02Rik|SemE|Semae
chr1	89888690	89889360	MACS_peak_5325	257.98	670	NM_178119	Agap1	257.98	3.92	31.61	347722	Centg2|Ggap1|R75364|mKIAA1099
chr5	114380606	114380975	MACS_peak_143145	257.63	369	NM_054093	Ube3b	257.63	7.03	23.75	117146	AI449831|AU020130
chr3	108150790	108151943	MACS_peak_101384	257.45	1153	NM_175470	Gpr61	257.45	9.98	31.71	229714	-
chr5	30588169	30588588	MACS_peak_136695	257.36	419	NM_010608	Kcnk3	257.36	9.71	23.74	16527	TASK|Task-1|cTBAK-1
chr5	138170809	138171241	MACS_peak_146624	257.26	432	ENSMUST00000147920	Mcm7	257.26	13.84	23.75	17220	AI747533|Mcmd7|mCDC47
chr7	44601868	44604727	MACS_peak_123848	256.94	2859	NM_008422	Kcnc3	256.94	6.1	32.01	16504	KShIIID|Kcr2-3|Kv3.3
chrX	56609834	56610187	MACS_peak_194928	255.51	353	NM_172780	Slc9a6	255.51	10.07	23.75	236794	3732426M05|6430520C02Rik|NHE6|mKIAA0267
chr8	3453913	3456600	MACS_peak_131160	255.27	2687	uc009krk.1	Arhgef18	255.27	10.88	32.16	102098	AI467246|D030053O22Rik
chr2	92059489	92060279	MACS_peak_88517	255.19	790	uc008kxg.1	AK039132	255.19	13.34	31.75	NA	NA
chr5	140685603	140686094	MACS_peak_146964	254.71	491	uc009ahz.1	Iqce	254.71	8.02	23.91	74239	1700028P05Rik|mKIAA1023
chr11	3683698	3684076	MACS_peak_23560	254.39	378	NM_198162	Morc2a	254.39	5.64	23.91	74522	8430403M08Rik|Zcwcc1
chr11	70640357	70642055	MACS_peak_28911	254.39	1698	NM_010326	Gp1ba	254.39	10.82	23.91	14723	GPIba|GPIbalpha
chr19	6141036	6141406	MACS_peak_69854	254.22	370	ENSMUST00000025893	Arl2	254.22	9.71	32.34	56327	2610009M23Rik|AI115441|AW553335
chr11	79014537	79015439	MACS_peak_25795	253.64	902	ENSMUST00000018478	Ksr1	253.64	8.64	31.87	16706	AW492498|B-KSR1|D11Bhm183e|D11Bhm184e|Ksr|RSU2|hb
chr12	72303656	72304418	MACS_peak_30516	253.21	762	NM_153457	Rtn1	253.21	5.08	32.48	104001	Nsp
chr4	120505152	120505513	MACS_peak_111067	253.19	361	uc008unf.2	Scmh1	253.19	6.35	31.91	29871	AI315320|AI851618|Scml1|Scml3
chrX	71970436	71970949	MACS_peak_168193	253.09	513	NM_001081135	Prrg3	253.09	13.75	31.96	208748	Gm368
chr7	118984256	118984645	MACS_peak_145473	252.79	389	NM_022420	Gprc5b	252.79	10.87	31.97	64297	AW125761|Raig2
chr13	93441014	93441621	MACS_peak_50316	252.4	607	NM_021310	Jmy	252.4	6.92	23.99	57748	-
chr14	55503836	55504152	MACS_peak_48468	252.37	316	NM_001024645	Lrrc16b	252.37	7.15	32	268747	CARMIL3|mFLJ00240
chr16	96525389	96525763	MACS_peak_76519	252.19	374	NM_008791	Pcp4	252.19	3.31	23.98	18546	P16Rimb19|Pcp-4|Pep19
chr17	23674883	23675524	MACS_peak_59904	251.93	641	NM_181821	Hcfc1r1	251.93	4.34	32.52	353502	HPIP
chr10	79716633	79717219	MACS_peak_19132	251.73	586	NM_008226	Hcn2	251.73	4.44	24	15166	BCNG2|HAC1|trls
chr7	73939118	73943464	MACS_peak_125771	251.54	4346	ENSMUST00000026896	St8sia2	251.54	3.51	32.59	20450	AI323367|ST8SiaII|STX|Siat8b
chr4	109676591	109677072	MACS_peak_128787	251.06	481	ENSMUST00000102724	Faf1	251.06	8.16	24.06	14084	AA408698|Dffrx|Fam
chr13	88821471	88822048	MACS_peak_38240	250.9	577	NM_010103	Edil3	250.9	8.04	32.66	13612	Del-1|Del1
chr8	3606503	3606820	MACS_peak_147667	250.85	317	NM_027171	Camsap3	250.85	6.32	32.08	69697	2310057J16Rik|Kiaa1543|Nezha
chr18	38590295	38590755	MACS_peak_74973	250.84	460	NM_011898	Spry4	250.84	7.73	32.07	24066	A030006O18Rik|sprouty4
chr7	110059529	110060037	MACS_peak_128266	250.73	508	ENSMUST00000098110	AA474408	250.73	3.75	32.74	767812	-
chr3	95172254	95174050	MACS_peak_116885	250.67	1796	NM_011351	Sema6c	250.67	6.63	24.05	20360	Semay|mKIAA1869
chr10	126978716	126979301	MACS_peak_23174	250.61	585	NM_001113470	Ctdsp2	250.61	7.89	24.04	52468	AI586070|D10Ertd73e|OS-4|OS4|SCP2
chr9	44798798	44799242	MACS_peak_186035	249.67	444	uc009pen.1	Tmem25	249.67	16.13	24.07	71687	0610039J01Rik|AI429491
chrX	155622959	155623327	MACS_peak_170567	249.61	368	NM_001093750	Ptchd1	249.61	8.6	32.14	211612	9630036J22Rik|AI848149|Gm387
chr15	76948543	76948919	MACS_peak_49816	249.44	376	NM_054099	1110038F14Rik	249.44	4.88	32.99	117171	-
chr8	109723963	109724932	MACS_peak_137395	249.36	969	NM_029468	Zfp821	249.36	6.29	33	75871	4930566A11Rik|Znf821
chr1	92831644	92832097	MACS_peak_4827	249.26	453	ENSMUST00000045970	Gpc1	249.26	5.84	32.99	14733	AI462976
chr2	153407491	153411829	MACS_peak_82581	248.99	4338	NM_001001986	Nol4l	248.99	5.73	33	329540	4931410H15|8430427H17Rik|AI429157|Gm1636
chr4	150643947	150644368	MACS_peak_101711	248.81	421	NM_173774	Slc45a1	248.81	7.48	33	242773	C230078B22|Dnb5
chr9	20428485	20429075	MACS_peak_183390	248.69	590	NM_011753	Zfp26	248.69	15.04	24.2	22688	5033428C05Rik|KRAB15|Zfp-26|Zfp70|Zfp81-rs1|mKIAA4196|mkr-3|mszf14|mszf52
chr2	24678875	24679643	MACS_peak_83882	248.65	768	NM_001042528	Cacna1b	248.65	3.57	32.18	12287	AW050276|AW060892|AW822256|Cav2.2|Cchn1a|alpha(1B)
chr11	87777092	87778606	MACS_peak_26888	248.59	1514	uc007kup.2	Bzrap1	248.59	7.93	32.16	207777	D230016K05|PRAX-1|mKIAA0612
chr2	157943856	157944719	MACS_peak_83203	248.44	863	NM_198627	Vstm2l	248.44	4.31	32.92	277432	Gm691
chr3	132904657	132905053	MACS_peak_119352	248.35	396	NM_033525	Npnt	248.35	8.26	24.2	114249	1110009H02Rik|AA682063|AI314031|Nctn|POEM
chr16	73894941	73895830	MACS_peak_74925	247.98	889	NM_175549	Robo2	247.98	8.72	24.27	268902	2600013A04Rik|9430089E08Rik|BB097918|D230004I22Rik|mKIAA1568
chr2	84880387	84880869	MACS_peak_88187	247.63	482	NM_199223	Rtn4rl2	247.63	6.98	32.18	269295	Ngr2|Ngrh1|Ngrl3
chr2	26407766	26409219	MACS_peak_97860	247.56	1453	NM_033134	Inpp5e	247.56	9.08	24.28	64436	1200002L24Rik|72kDa|mKIAA0123
chr14	32085412	32086053	MACS_peak_42138	247.43	641	ENSMUST00000022462	Oxnad1	247.43	9.32	33.19	218885	2410002F01Rik|AW492292|BC019806
chr4	148056290	148057271	MACS_peak_101314	247.22	981	NM_010840	Mthfr	247.22	14.62	33.2	17769	AI323986
chr17	33939747	33940304	MACS_peak_61205	246.92	557	ENSMUST00000173363	H2-Ke2	246.92	8.5	33.17	NA	NA
chr3	130068411	130068978	MACS_peak_90722	246.75	567	ENSMUST00000076703	Gm9396	246.75	5.24	33.25	668844	EG668844
chr10	11079838	11080956	MACS_peak_10676	246.5	1118	uc007ejh.2	Grm1	246.5	10.98	33.31	14816	4930455H15Rik|ENSMUSG00000075319|Gm10828|Gprc1a|mGluR1|nmf373|rcw|wobl
chr5	130876198	130876556	MACS_peak_125097	246.47	358	NM_145218	Wbscr17	246.47	17.55	32.01	212996	AA388321|E330012B09Rik
chr2	90905665	90906110	MACS_peak_88313	246.32	445	NM_025991	Kbtbd4	246.32	10.9	32.03	67136	2510026C23Rik
chr14	62605872	62608486	MACS_peak_57142	246.03	2614	ENSMUST00000039064	Fam124a	246.03	5.99	24.24	629059	EG629059
chr14	52232544	52232930	MACS_peak_48309	245.71	386	NM_201637	Chd8	245.71	4.51	32.05	67772	5830451P18Rik|AU015341|Duplin|HELSNF1|mKIAA1564
chr4	124838318	124838917	MACS_peak_111410	245.57	599	NM_008636	Mtf1	245.57	11.7	32.05	17764	MTF-1|Thyls
chr12	16894977	16895330	MACS_peak_36173	245.49	353	NM_009072	Rock2	245.49	4.75	24.3	19878	B230113H15Rik|ROKalpha|Rho-kinase|Rock-II|Rock2m|mKIAA0619
chr14	111675114	111675723	MACS_peak_59643	245.37	609	NM_198865	Slitrk5	245.37	7.57	24.28	75409	2610019D03Rik
chr8	72494557	72497106	MACS_peak_135288	245.32	2549	ENSMUST00000058534	Med26	245.32	10.28	33.41	70625	5730493L18Rik|AI414941|AW495270|Crsp7
chr4	152016699	152017515	MACS_peak_133717	245.22	816	NM_001033352	Klhl21	245.22	10.73	24.28	242785	1810045K06Rik|D330008A20|mKIAA0469
chr2	65022459	65022782	MACS_peak_86978	245.01	323	ENSMUST00000028252	Grb14	245.01	5.77	32.02	50915	AI505286
chr9	79692027	79692432	MACS_peak_189518	244.51	405	uc009quu.1	Col12a1	244.51	15.43	24.27	12816	-
chr19	50677906	50678527	MACS_peak_81713	244.08	621	ENSMUST00000072685	Sorcs1	244.08	8.34	32.08	58178	Sorcs|mSorCS
chr10	81398353	81401071	MACS_peak_19438	244.04	2718	NM_008688	Nfic	244.04	4.85	24.33	18029	1110019L22Rik|1500041O16Rik|AA589446|AI746521|NF1-C
chr1	74351757	74353618	MACS_peak_3636	243.54	1861	NM_019999	Pnkd	243.54	3.16	33.34	56695	2210013N15Rik|2810403H05Rik|AI854243|Brp17|MNCb-5687|MR-1|Tahccp2
chr7	101321488	101322033	MACS_peak_127848	243.4	545	ENSMUST00000172630	Stard10	243.4	9.37	33.35	56018	AV048538|CGI-52|NY-C0-28|PC-TP2|PCTP2|Pctpl|Sdccag28|SdccagG28|TISP-81
chr11	66525308	66525892	MACS_peak_28436	243.3	584	NM_001034874	Shisa6	243.3	6.21	24.4	380702	Gm879|ckamp52
chr7	118740225	118740775	MACS_peak_129090	243.27	550	ENSMUST00000059390	9030624J02Rik	243.27	10.44	33.36	71517	2610029J22Rik
chr7	83891999	83892475	MACS_peak_165562	242.99	476	NM_023403	Mesdc2	242.99	4.9	24.43	67943	2210015O11Rik|AW537813|mKIAA0081|mesd|msd
chr2	18046016	18048449	MACS_peak_97170	242.78	2433	NM_028317	Skida1	242.78	7.67	24.45	72668	2810030E01Rik|5730507N06Rik|BB088113
chrX	53608519	53609122	MACS_peak_148985	242.25	603	ENSMUST00000169626	Cxx1c	242.25	4.94	33.37	72865	2900027G03Rik|Mar8.1|Mart8a
chr17	71002107	71002554	MACS_peak_63289	242	447	ENSMUST00000148960	Myl12a	242	7.81	33.41	67268	2900073G15Rik|AI838292|C80200
chr5	74000701	74001224	MACS_peak_140021	241.96	523	NM_177561	Usp46	241.96	6.56	24.51	69727	1190009E20Rik|2410018I08Rik|AI451644
chr11	77785679	77786372	MACS_peak_25625	241.87	693	ENSMUST00000092883	Gm10277	241.87	19.43	32.18	791303	ENSMUSG00000069804
chr2	173659759	173660141	MACS_peak_84445	241.36	382	ENSMUST00000029024	Rab22a	241.36	11.38	33.44	19334	3732413A17Rik|AI662177|AW319644|AW550514|E130120E14Rik|Rab22
chr5	143651240	143651791	MACS_peak_147351	241.35	551	NM_001163548	Cyth3	241.35	9.35	24.61	19159	AI648983|ARNO3|CLM3|Grp1|Pscd3
chr7	66109514	66110227	MACS_peak_125450	241.29	713	NM_001081163	Chsy1	241.29	6.82	33.46	269941	mKIAA0990
chr14	100022621	100023168	MACS_peak_45209	241.14	547	NM_010636	Klf12	241.14	4.71	33.45	16597	2700063E05Rik|AI225908|AI315654|AP-2rep|B130052C06Rik|D530033K05Rik
chr3	81036608	81037554	MACS_peak_99184	241.09	946	NM_019971	Pdgfc	241.09	9.6	32.19	54635	1110064L01Rik|AI647969|PDGF-C
chr7	79875324	79876335	MACS_peak_165126	240.62	1011	NM_009682	Ap3s2	240.62	7.67	24.59	11778	[s]3B
chr11	88192596	88193968	MACS_peak_26959	240.24	1372	NM_198013	Cuedc1	240.24	4.73	32.2	103841	AI841487|C330016O16Rik
chr17	56626365	56626875	MACS_peak_62427	240.2	510	uc008dco.2	Lonp1	240.2	5.23	33.5	74142	1200017E13Rik|LON|Prss15
chr14	30352924	30353486	MACS_peak_54833	239.82	562	NM_001083616	Cacna1d	239.82	7.5	24.58	12289	8430418G19Rik|C79217|Cach3|Cacn4|Cacnl1a2|Cav1.3|Cchl1a|Cchl1a2|D-LTCC
chr14	73325522	73325822	MACS_peak_49834	239.74	300	ENSMUST00000022701	Rb1	239.74	15.04	32.29	19645	Rb|Rb-1|pRb
chr4	42957317	42958793	MACS_peak_106116	239.52	1476	ENSMUST00000037872	Dnajb5	239.52	5.93	32.31	56323	1110058L06Rik|AI462558|Hsc40|Hsp40-3
chr17	25844399	25844755	MACS_peak_60179	239.29	356	NM_145999	Rhot2	239.29	6.86	33.68	214952	Arht2|Miro2
chr2	131520094	131521171	MACS_peak_81135	238.16	1077	uc029uet.1	Smox	238.16	5.24	33.91	228608	B130066H01Rik|PAO|PAOh1|SMO
chr7	4715685	4716368	MACS_peak_159500	237.93	683	ENSMUST00000086363	Tmem150b	237.93	8.51	24.79	330460	A630041N19|Tmem224
chr9	62419491	62421413	MACS_peak_143568	237.8	1922	NM_175484	Coro2b	237.8	4.69	33.92	235431	CLIPINC|E130012P22Rik
chr8	84916552	84916909	MACS_peak_136096	237.79	357	uc009moe.1	Mast1	237.79	5.58	33.91	56527	9430008B02Rik|SAST|SAST170
chr10	94220680	94221074	MACS_peak_20927	237.7	394	ENSMUST00000020209	Ndufa12	237.7	11.44	24.79	66414	2410011G03Rik|AW112974
chr10	90576516	90577195	MACS_peak_15584	237.67	679	ENSMUST00000182113	Anks1b	237.67	4.6	33.9	77531	AIDA-1b|C030032C09Rik|E530015N03Rik|ENSMUSG00000078431|Gm10937|Gm1555
chr6	120364098	120364778	MACS_peak_157267	237.42	680	NM_145997	Kdm5a	237.42	5.76	24.79	214899	AA409370|C76986|Jarid1a|RBP2|Rbbp2
chr8	61349399	61349702	MACS_peak_134439	236.88	303	NM_021506	Sh3rf1	236.88	7.96	33.89	59009	2200003J05Rik|Posh|R75531|Sh3md2
chr8	79371783	79372364	MACS_peak_177439	236.79	581	NM_008539	Smad1	236.79	3.72	24.76	17125	AI528653|Madh1|Madr1|Mlp1|MusMLP
chr9	108826319	108830040	MACS_peak_146737	236.33	3721	NM_080437	Celsr3	236.33	5.61	33.93	107934	Adgrc3|Fmi1|flamingo|mKIAA0812
chr3	86084367	86085357	MACS_peak_116065	236.3	990	ENSMUST00000182666	Sh3d19	236.3	5.55	24.78	27059	AW011754|Kryn
chr5	123445467	123446307	MACS_peak_110495	236.27	840	NM_177582	Mlxip	236.27	6.91	33.92	208104	AW228700|Mir|bHLHe36
chr9	22157731	22158358	MACS_peak_140554	236.16	627	ENSMUST00000123680	Pigyl	236.16	5.86	33.9	66268	1810008A14Rik|PIG-Y|Pigy
chr5	34562743	34563561	MACS_peak_137228	235.82	818	NM_011893	Sh3bp2	235.82	13.1	24.81	24055	3BP2
chr15	51882150	51882559	MACS_peak_63735	235.76	409	NM_030132	Utp23	235.76	9.63	24.82	78581	1700010I21Rik|AI662478|BB238373|D530033C11Rik
chr17	7945613	7946303	MACS_peak_66485	235.53	690	NM_025789	Rsph3a	235.53	10.55	32.37	66832	1700012G05Rik|4930524H12Rik|R74860|Rshl2|Rshl2a
chr4	62689498	62690626	MACS_peak_107463	235.4	1128	NM_134257	Rgs3	235.4	5.27	32.38	50780	4930506N09Rik|C2PA-RGS3|C2pa|PDZ-RGS3|RGS3S
chr3	89380343	89381294	MACS_peak_88617	235.35	951	NM_009565	Zbtb7b	235.35	8.28	34.22	22724	Thpok|Zfp67|c-Krox
chr12	69322100	69322556	MACS_peak_39366	235.2	456	uc007nsd.1	Nemf	235.2	5.37	24.81	66244	1500011I12Rik|4933405E14Rik|Sdccag1
chr11	31359362	31360516	MACS_peak_21681	235.11	1154	ENSMUST00000020546	Stc2	235.11	9.58	32.36	20856	AW125853|Stc2l|mustc2
chr9	102354281	102354693	MACS_peak_164488	234.95	412	NM_173447	Ephb1	234.95	7.93	32.38	270190	9330129L11|AW488255|C130099E04Rik|Cek6|ENSMUSG00000074119|Elk|Elkh|Hek6|Net
chr10	85102626	85102997	MACS_peak_15122	234.92	371	NM_001013028	Tmem263	234.92	9.64	34.26	103266	AI597468
chr14	63177682	63178119	MACS_peak_43670	234.3	437	NM_010191	Fdft1	234.3	4.68	34.3	14137	SQS|SS
chr6	83160911	83162891	MACS_peak_131965	234.04	1980	uc009cmx.2	1700003E16Rik	234.04	6.15	32.47	71837	AU041756
chr5	135161479	135162170	MACS_peak_146167	234.02	691	NM_013763	Tbl2	234.02	9.77	24.89	27368	C76179|WS-bTRP
chr16	17277971	17278657	MACS_peak_60683	233.5	686	NM_177473	Tmem191c	233.5	6	32.59	224019	4933405M22Rik|D16Bwg1494e|MNCb-4137
chr1	181211075	181211978	MACS_peak_10588	233.47	903	NM_145514	Wdr26	233.47	7.56	32.58	226757	1600024A01Rik|AA693241|AI447817|AU044014|C77982|Gid7
chr12	76404369	76406545	MACS_peak_40101	233.33	2176	NM_008301	Hspa2	233.33	8.97	24.96	15512	70kDa|HSP70.2|HSP70A2|Hsp70-2
chr4	103115271	103115660	MACS_peak_109417	233.21	389	ENSMUST00000134533	Mier1	233.21	7.87	32.62	71148	4933425I22Rik|5830411K19Rik|er1
chr7	80589636	80589951	MACS_peak_165233	233.18	315	NM_173863	Crtc3	233.18	6.86	24.95	70461	2610312F20Rik|6332415K15Rik|AI429792|BC011210|TORC3
chr12	3426856	3427212	MACS_peak_30685	232.94	356	NM_172421	Asxl2	232.94	8.86	32.6	75302	4930556B16Rik|mKIAA1685
chr7	30554468	30555443	MACS_peak_138735	232.88	975	ENSMUST00000044048	Hspb6	232.88	13.17	32.59	243912	AA387366|Gm479|Hsp20
chr6	118089815	118090171	MACS_peak_119803	232.58	356	NM_027526	Rasgef1a	232.58	5.92	34.55	70727	6330404M18Rik|AI835194
chr13	21363509	21364051	MACS_peak_45639	232.56	542	uc007pqf.1	Zscan12	232.56	9.23	24.96	22758	2510038J07Rik|FPM315|Zfp96|mKIAA0426|zfp-96
chr7	123123901	123124332	MACS_peak_169535	232.22	431	NM_144925	Tnrc6a	232.22	8.93	24.98	233833	2010321I05Rik|3110054G10Rik|AW557223|CAGH26|D130023A07Rik|GW182|Tnrc6
chr19	45047575	45047890	MACS_peak_81223	231.98	315	NM_053197	Sfxn3	231.98	11.6	32.61	94280	-
chrX	93675101	93675476	MACS_peak_196119	230.85	375	ENSMUST00000045898	Pcyt1b	230.85	7.16	25.08	236899	AW045697|CTTbeta
chr16	52452392	52453234	MACS_peak_56448	230.58	842	ENSMUST00000023312	Alcam	230.58	9.57	34.62	11658	AI853494|BEN|CD166|DM-GRASP|MuSC|SC1
chr11	76571030	76571535	MACS_peak_25495	230.38	505	ENSMUST00000072740	Abr	230.38	7.29	32.83	109934	-
chr8	33653453	33653779	MACS_peak_174334	230.3	326	NM_010344	Gsr	230.3	5.66	25.13	14782	AI325518|D8Ertd238e|Gr-1|Gr1
chr13	48804334	48804722	MACS_peak_40868	230.09	388	NM_011078	Phf2	230.09	7.97	32.82	18676	GRC5
chr1	59629994	59630326	MACS_peak_3859	230.06	332	NM_001013771	Gm973	230.06	6.97	25.15	381260	AW554518
chr19	46285659	46286510	MACS_peak_81364	229.82	851	NM_178930	Gbf1	229.82	7.57	32.82	107338	1700083E03Rik|AI035702|AW049900|mKIAA0248
chrX	85614174	85615429	MACS_peak_195842	229.68	1255	NM_025729	Tab3	229.68	8.53	25.17	66724	4921526G09Rik|Map3k7ip3|mKIAA4135
chr2	25500888	25501217	MACS_peak_97757	229.35	329	uc008isk.1	Fbxw5	229.35	7.03	25.2	30839	AI159739|Fbw5
chr13	74406395	74407317	MACS_peak_42496	229.25	922	ENSMUST00000090860	Gm10116	229.25	5.04	32.76	NA	NA
chr12	98574156	98574712	MACS_peak_36576	229.07	556	uc007oqg.1	Kcnk10	229.07	8.99	32.75	72258	1700024D23Rik|3010005K24Rik|Trek2
chr4	129473774	129474245	MACS_peak_130850	228.81	471	NM_133889	Bsdc1	228.81	6.59	25.26	100383	1110063F24Rik|AW011758
chr17	15704966	15705312	MACS_peak_78231	228.52	346	NM_007690	Chd1	228.52	7.66	25.26	12648	4930525N21Rik|AI851787|AW555109
chr16	14099792	14101266	MACS_peak_53737	228.41	1474	NM_144518	2900011O08Rik	228.41	3.56	35.05	67254	MINP
chr15	78409987	78410664	MACS_peak_65697	227.61	677	uc007wpf.2	Mpst	227.61	5.56	25.23	246221	Mst
chr14	16574857	16575476	MACS_peak_45491	227.27	619	NM_011243	Rarb	227.27	10.34	33.01	218772	A830025K23|Hap|Nr1b2
chr19	5664634	5665247	MACS_peak_78698	227.07	613	NM_144868	Pcnxl3	227.07	10.43	33.01	NA	NA
chr1	106712285	106713141	MACS_peak_6071	226.9	856	NM_177410	Bcl2	226.9	10.48	33.01	12043	AW986256|Bcl-2|C430015F12Rik|D630044D05Rik|D830018M01Rik
chrX	94367153	94367501	MACS_peak_149865	226.68	348	NM_001199337	Apoo	226.68	6.54	35.37	68316	0610008C08Rik|1110019O03Rik
chr9	107399754	107400283	MACS_peak_146510	226.27	529	ENSMUST00000010210	Cacna2d2	226.27	7.84	35.34	56808	Cacna2d|a2d2|du|mKIAA0558|td|torpid
chr9	41157298	41157814	MACS_peak_141766	226.03	516	ENSMUST00000044155	Ubash3b	226.03	6.4	35.36	72828	2810457I06Rik|BB125008|TULA-2|p70
chr5	53213129	53213452	MACS_peak_119305	225.97	323	NM_172710	Sel1l3	225.97	17.51	32.94	231238	2310045A20Rik|AI429585|mKIAA0746
chr6	82911952	82914104	MACS_peak_117254	225.65	2152	NM_011350	Sema4f	225.65	5.98	35.35	20355	Sema W
chr11	20543252	20543760	MACS_peak_21018	225.4	508	NM_021372	Sertad2	225.4	13.94	32.97	58172	AB041541|AU021878|Kiaa0127|MNCb-1504|SEI-2|Sei2|TRIP-Br2|mKIAA0127
chr11	3494932	3495261	MACS_peak_20189	225.18	329	uc029rkf.1	Inpp5j	225.18	10.98	33.02	170835	Pib5pa|Pipp
chr1	62795720	62796205	MACS_peak_4161	225	485	NM_001077406	Nrp2	225	16.28	25.37	18187	1110048P06Rik|Np-2|Np2|Npn-2|Npn2
chr4	140721099	140723220	MACS_peak_100799	224.83	2121	NM_173867	Rcc2	224.83	4.05	35.48	108911	2610510H01Rik|2610529N02Rik|AA536646|AA675016|Td60|mKIAA1470
chr17	32143243	32143791	MACS_peak_60998	224.34	548	NM_008716	Notch3	224.34	9.43	35.55	18131	AW229011|N3|hpbk
chr5	81794263	81796050	MACS_peak_140572	223.86	1787	ENSMUST00000036068	Lphn3	223.86	6.01	25.44	NA	NA
chr5	41843931	41844315	MACS_peak_118545	223.51	384	NM_001081422	Bod1l	223.51	8.34	33.14	665775	A230054D04Rik|AI853319|FAM44A|mKIAA1327
chr4	139291002	139291820	MACS_peak_132153	223.32	818	NM_009798	Capzb	223.32	3.46	25.44	12345	1700120C01Rik|AI325129|CPB1|CPB2|CPbeat2|CPbeta1|CPbeta2|Cappb1
chr1	192137738	192138040	MACS_peak_13150	223.2	302	NM_144814	Rcor3	223.2	10.65	25.45	214742	4921514E24Rik|C730034D20Rik|E130101E15Rik
chr13	21513399	21514075	MACS_peak_45665	223.16	676	NM_139141	Zkscan8	223.16	17.02	25.45	93681	2510038J07Rik|D430019P06Rik|LD5-1|Zfp192
chr1	52727022	52727462	MACS_peak_2741	223.15	440	ENSMUST00000087701	Mfsd6	223.15	9.56	33.21	98682	2210010L05Rik|9630025I22Rik|AI836200|AW212394|MMR2
chr4	123715863	123716326	MACS_peak_129931	222.94	463	ENSMUST00000106207	Ndufs5	222.94	4.58	25.48	595136	AI256693
chr5	65597548	65598524	MACS_peak_119712	221.95	976	NM_016786	Ube2k	221.95	8.93	33.28	53323	AW492011|D5Ertd601e|E2-25k|HIP-2|Hip2|Hypg|Lig
chr6	38696921	38698596	MACS_peak_150811	221.84	1675	ENSMUST00000161779	Hipk2	221.84	8.37	25.59	15258	1110014O20Rik|B230339E18Rik|Stank
chr8	70895109	70895507	MACS_peak_176658	221.3	398	NM_029751	Rpl18a	221.3	6.98	25.62	76808	2510019J09Rik
chr6	15720660	15720963	MACS_peak_148875	221.06	303	NM_175088	Mdfic	221.06	12.11	25.62	16543	Kdt1|Mdfid
chr11	109230422	109231898	MACS_peak_33462	220.77	1476	NM_001165934	Rgs9	220.77	10.46	25.61	19739	RGS9-1|Rgs9-2
chr1	19104363	19104797	MACS_peak_1069	220.75	434	NM_153154	Tfap2d	220.75	15.83	25.62	226896	Tcfap2d
chr6	29405870	29406191	MACS_peak_114369	220.74	321	NM_145574	Ccdc136	220.74	4.89	35.74	232664	4921511K06Rik|BC006583
chr3	59264921	59265284	MACS_peak_98384	220.68	363	NM_177855	Med12l	220.68	8.75	33.49	329650	A130035F20|A630079M02|AU044581|TRALPUSH
chr4	133369705	133370907	MACS_peak_99887	220.67	1202	ENSMUST00000030669	Slc9a1	220.67	5.19	35.74	20544	AW554487|Apnh|Mir5122|Nhe1|mir-5122|swe
chr11	69106452	69107069	MACS_peak_24671	220.49	617	NM_011065	Per1	220.49	5.99	33.56	18626	Hftm|Per|m-rigui|mPer1
chr17	10839760	10840311	MACS_peak_66715	219.99	551	ENSMUST00000041463	Pacrg	219.99	16.23	33.6	69310	1700008H23Rik
chrX	101222261	101222563	MACS_peak_196466	219.9	302	NM_018875	Snx12	219.9	8.87	25.66	55988	2610001F05Rik|AW045757|SDP8
chr4	103214663	103215164	MACS_peak_109440	219.78	501	ENSMUST00000150285	Slc35d1	219.78	12.01	33.62	242585	AI834976|C330011J09|UGTREL7|mKIAA0260
chr12	102369066	102369712	MACS_peak_37030	219.07	646	NM_177620	Rin3	219.07	17.27	33.63	217835	6430500K07|C86933
chr7	141447369	141447707	MACS_peak_147176	219.02	338	ENSMUST00000084434	Rplp2	219.02	4.64	33.61	67186	2700049I22Rik
chr6	38298891	38299259	MACS_peak_150747	218.82	368	NM_172467	Zc3hav1l	218.82	13.28	25.65	209032	B130055L09Rik|E430016P22Rik
chr1	128186757	128187254	MACS_peak_8269	218.72	497	uc007cli.1	R3hdm1	218.72	5.26	25.65	226412	R3hdm
chr11	5281726	5282505	MACS_peak_20462	218.6	779	NM_001080924	Znrf3	218.6	15.06	33.63	407821	Gm1167
chr5	150800577	150801017	MACS_peak_127530	218.58	440	NM_175310	Pds5b	218.58	5.92	33.62	100710	AI646570|AS3|AW212954|Aprin|mKIAA0979
chr11	19924374	19924956	MACS_peak_20928	218.05	582	ENSMUST00000093299	Spred2	218.05	6.31	33.66	114716	C79158
chr19	10182887	10183264	MACS_peak_70175	217.24	377	NM_146094	Fads1	217.24	5.8	36.08	76267	0710001O03Rik|A930006B21Rik|AI317215|DSD
chrX	142966207	142966728	MACS_peak_197653	217.02	521	NM_019496	Ammecr1	217.02	10.21	25.8	56068	6230420G18Rik
chr11	106920180	106920715	MACS_peak_33078	216.98	535	NM_025481	Smurf2	216.98	11.44	25.79	66313	2810411E22Rik|AI558114|AI649275
chr5	122988867	122989306	MACS_peak_144424	216.29	439	ENSMUST00000118027	Kdm2b	216.29	10.29	25.88	30841	Cxxc2|Fbl10|Fbxl10|Jhdm1b|PCCX2
chr4	108478872	108479628	MACS_peak_110120	216.21	756	NM_175472	Zcchc11	216.21	8.6	33.4	230594	6030404K05Rik|9230115F04Rik|PPAPD3|mKIAA0191
chr14	57699257	57700558	MACS_peak_43329	216.02	1301	NM_015771	Lats2	216.02	5.89	36.22	50523	4932411G09Rik|AV277261|AW228608
chr17	51811767	51813445	MACS_peak_81286	215.71	1678	ENSMUST00000152830	Satb1	215.71	11.41	25.93	20230	2610306G12Rik|AW413156
chr1	38534905	38535291	MACS_peak_1751	215.6	386	NM_001290814	Aff3	215.6	5.83	36.14	16764	3222402O04Rik|A730046J16|LAF-4|Laf4
chr17	28315598	28316187	MACS_peak_60568	214.8	589	NM_001163819	Fance	214.8	9.16	36.38	72775	2810451D06Rik|AI415634|AW209126
chr17	46735838	46736908	MACS_peak_61787	214.75	1070	NM_028065	Cnpy3	214.75	4.65	36.35	72029	1600025D17Rik|2410050O22Rik|AI413153|CAG4A|ERDA5|PRAT4A|Tnrc5
chr15	89354563	89355612	MACS_peak_57626	214.68	1049	uc007xgf.2	Lmf2	214.68	10.67	33.57	105847	AI451006|Tmem112b|Tmem153
chr16	60604863	60605531	MACS_peak_63755	214.19	668	NM_007938	Epha6	214.19	12.47	33.57	13840	Ehk2|Hek12|m-ehk2
chr11	6193153	6193476	MACS_peak_18140	214.16	323	NM_173748	Nudcd3	214.16	5.87	36.36	209586	AI427847|BC024322|mKIAA1068
chr1	81240883	81241969	MACS_peak_3940	214.09	1086	NM_172849	Nyap2	214.09	8.34	36.36	241134	9430031J16Rik|Jr6|Kiaa1486
chr10	117073914	117074879	MACS_peak_22256	214.03	965	NM_177798	Frs2	214.03	4.3	25.99	327826	4732458E18|C330018A15Rik|Frs2alpha|SNT1
chr6	125306570	125306950	MACS_peak_135499	213.95	380	NM_010736	Ltbr	213.95	8.26	33.58	17000	AI256028|CD18|LTbetaR|Ltar|TNF-R-III|TNFCR|TNFR-RP|TNFR2-RP|TNFRrp|Tnfbr|Tnfrsf3
chr2	112262312	112262692	MACS_peak_79628	213.75	380	NM_025403	Nop10	213.75	3.29	36.35	66181	1110036B12Rik|NOP10P|Nola3
chr5	123684251	123684618	MACS_peak_124290	212.99	367	ENSMUST00000111566	Clip1	212.99	10.75	33.66	56430	1110007I12Rik|4631429H07Rik|AV017631|C81039|CLIP-170|CLIP170|CYLN1|Clip50|Rsn|mKIAA4046|restin
chr11	115800665	115802141	MACS_peak_29572	212.85	1476	NM_080643	Caskin2	212.85	10.45	33.63	140721	1600028L06Rik|mKIAA1139
chr7	24585152	24586138	MACS_peak_137950	212.67	986	NM_001033205	Zfp575	212.67	7.24	33.61	101544	AI326876|Znf575
chr9	21404695	21405363	MACS_peak_140416	212.66	668	NM_010561	Ilf3	212.66	5.45	36.48	16201	MBII-26|MPHOSPH4|NF90|NFAR
chr15	101845425	101846279	MACS_peak_68481	212.52	854	NM_008473	Krt1	212.52	6.17	26.03	16678	Krt-2.1|Krt2-1|Krt86
chr7	49408632	49409104	MACS_peak_162661	212.42	472	uc009hbg.2	Nav2	212.42	4.41	26.03	78286	5330421F07Rik|AU067780|BQ960892|HELAD1|POMFIL2|RAINB1|RAINB2|Unc53H2|mKIAA3015
chr4	74188829	74189383	MACS_peak_125780	212.02	554	NM_172869	Frmd3	212.02	7.5	26.07	242506	4.1O|9430066I12Rik|EPB41L4O|P410
chr15	5176485	5176972	MACS_peak_52298	211.6	487	NM_001013367	Prkaa1	211.6	8.32	33.77	105787	AI194361|AI450832|AL024255|AMPKalpha1|C130083N04Rik
chr19	46044829	46045214	MACS_peak_81338	211.54	385	ENSMUST00000152946	Ldb1	211.54	5.28	33.73	16825	CLIM2|NLI
chr14	65975580	65975992	MACS_peak_44022	210.95	412	NM_013492	Clu	210.95	4.32	36.66	12759	AI893575|ApoJ|Cli|D14Ucla3|SP-40|Sgp-2|Sgp2|Sugp-2
chr7	19372923	19373346	MACS_peak_137754	210.48	423	NM_001010836	Ppp1r13l	210.48	18.89	33.81	333654	AV260376|IASPP|Nkip1|wa3
chr8	11728104	11728416	MACS_peak_148231	210.47	312	NM_001113517	Arhgef7	210.47	6.86	33.82	54126	Cool|PIX|Pak3bp|betaPix|betaPix-b|betaPix-c|cool-1|mKIAA0142|p85Cool1|p85SPR
chr7	6131584	6132626	MACS_peak_159571	210	1042	NM_001013012	Zfp787	210	8.14	26.05	67109	2210018M03Rik|Znf787
chr7	27257299	27257832	MACS_peak_138202	209.83	533	NM_133770	Adck4	209.83	11.15	33.87	76889	0610012P18Rik
chr11	101170724	101171351	MACS_peak_28002	209.5	627	ENSMUST00000043397	Plekhh3	209.5	11.26	33.87	217198	BC020025
chr19	5637482	5637841	MACS_peak_78688	209.46	359	ENSMUST00000025867	Rela	209.46	9.74	33.86	19697	p65
chr19	47178819	47179551	MACS_peak_72396	209.4	732	NM_021360	Neurl1a	209.4	6.96	36.65	18011	2410129E16Rik|AI450910|AI481072|Neu1|Neur1|Neurl|Neurl1|Nlz|Rnf67
chr10	79983909	79984232	MACS_peak_19190	209.35	323	NM_001003949	Tmem259	209.35	9.56	26.06	216157	AC087114.7gm2|ORF61|R32184_3|mFLJ00277
chr17	49456021	49458747	MACS_peak_81103	209.06	2726	NM_001008231	Daam2	209.06	5.08	26.11	76441	2310016D11Rik|AI843643|AW557870
chr16	38450128	38450483	MACS_peak_62511	208.95	355	NM_007414	Adprh	208.95	6.2	33.85	11544	Arh1
chr9	64340622	64341153	MACS_peak_162183	208.95	531	ENSMUST00000120760	Dis3l	208.95	11.61	33.84	213550	AV340375
chr6	5484173	5484866	MACS_peak_148301	208.91	693	NM_013743	Pdk4	208.91	16.11	26.11	27273	AV005916
chr6	120493427	120493807	MACS_peak_135175	208.36	380	NM_033567	Cecr6	208.36	11.57	33.94	94047	AW048664
chr16	5050067	5050781	MACS_peak_68885	208.21	714	NM_026666	Ubn1	208.21	9.29	26.17	170644	1110029L11Rik|2610108L02Rik|AA673476|AW124741
chr18	62949874	62950196	MACS_peak_88802	208.17	322	NM_133237	Apcdd1	208.17	14.94	26.18	494504	AB023957|AU041258|Drapc1|EIG180
chr9	21238609	21239332	MACS_peak_158162	207.88	723	NM_016679	Keap1	207.88	8.71	33.97	50868	INRF2|mKIAA0132
chr10	89640199	89641116	MACS_peak_20400	207.28	917	NM_198021	Scyl2	207.28	7.33	26.2	213326	AU015688|AW536445|BC030932|CVAK104|D10Ertd802e
chr4	142141486	142141796	MACS_peak_113756	206.83	310	NM_001109684	Kazn	206.83	7.43	33.75	71529	2310007B04Rik|9030409G11Rik|AI256607|AI666764|AW061099|Kaz|Kazrin
chr18	74304727	74305031	MACS_peak_89957	206.77	304	NM_028948	Cfap53	206.77	11.48	26.2	74453	4933415I03Rik|Ccdc11
chr17	26961435	26962498	MACS_peak_67896	206.74	1063	NM_001281491	Syngap1	206.74	5.93	33.76	240057	Gm1963|Syngap
chr9	43105178	43105718	MACS_peak_160138	206.68	540	NM_027144	Arhgef12	206.68	6.73	33.76	69632	2310014B11Rik|AU019857|Larg|mKIAA0382
chr14	124676509	124677127	MACS_peak_61067	206.11	618	NM_207667	Fgf14	206.11	9.47	26.21	14169	FHF-4|Fhf4|mFHF-4(1B)
chr17	26138685	26139041	MACS_peak_67790	205.83	356	NM_009733	Axin1	205.83	11.11	33.92	12005	AI316800|Axin|Fu|Kb|Ki|fused|kinky|knobbly
chr2	118901452	118901757	MACS_peak_80010	205.69	305	ENSMUST00000036578	Bahd1	205.69	7.95	37.28	228536	AL022997|AW541238|Gm117|mKIAA0945
chr18	60712722	60713632	MACS_peak_67512	205.2	910	uc008fat.1	Ndst1	205.2	6.01	37.34	15531	1200015G06Rik|Hsst|NDST-1|b2b2230Clo
chr2	150904356	150904741	MACS_peak_82359	205.14	385	ENSMUST00000056149	Abhd12	205.14	4.99	37.35	76192	1500011G07Rik|6330583M11Rik|AI431047|AW547313
chr15	89532889	89533454	MACS_peak_51294	205.11	565	ENSMUST00000167173	Shank3	205.11	4.79	37.34	58234	AI841104|SHANK3c-3|SHANK3c-4|Shank3b
chr8	66860216	66861046	MACS_peak_134723	205.1	830	NM_001163564	Naf1	205.1	4.52	37.34	234344	Gm174
chr2	179975412	179975820	MACS_peak_95447	205.1	408	NM_001081092	Taf4a	205.1	10.67	33.89	NA	NA
chr8	69817722	69818762	MACS_peak_176445	205.08	1040	uc009lxs.1	Gmip	205.08	12.48	26.23	78816	5031419I10Rik
chr2	153267354	153267839	MACS_peak_92776	204.71	485	NM_080463	Pofut1	204.71	7.12	33.93	140484	O-FucT-1|mKIAA0180
chr18	35771558	35772012	MACS_peak_74544	204.5	454	NM_019912	Ube2d2a	204.5	5.49	33.93	56550	1500034D03Rik|Ubc2e|Ube2d2|ubc4
chr8	90347862	90348343	MACS_peak_136414	204.36	481	ENSMUST00000109621	Tox3	204.36	8.81	37.37	244579	500-9|BC052044|C230068E13|CAGF9|Tnrc9
chr19	47067747	47068318	MACS_peak_94786	204.04	571	NM_177342	Taf5	204.04	14.53	26.31	226182	6330528C20Rik|AV117817
chr7	38019109	38019552	MACS_peak_139141	204	443	NM_011274	Uri1	204	9.22	33.97	19777	C80913|NNX3|Rmp
chr19	10577156	10577804	MACS_peak_79228	203.98	648	NM_201351	Cyb561a3	203.98	10.32	33.96	225912	2310004G04Rik|Cybasc3|Lcytb
chr6	56714904	56715214	MACS_peak_130876	203.76	310	NM_030235	Avl9	203.76	7.68	34.01	78937	5830411G16Rik|D730049P16Rik|mKIAA0241
chr17	26922904	26923302	MACS_peak_60353	203.67	398	NM_053173	Kifc5b	203.67	9.87	37.4	16580	Hset|KNSL2|Kifc5a
chr13	44906232	44906735	MACS_peak_47058	203.59	503	NM_021878	Jarid2	203.59	4.95	26.36	16468	Jmj|jumonji
chr16	93739153	93739479	MACS_peak_76272	203.57	326	uc007zzu.1	Dopey2	203.57	5.79	26.36	70028	0610038M01Rik|2610510B01Rik|AI503246|C21orf5|mKIAA0933
chr14	8665977	8666290	MACS_peak_40114	203.42	313	NM_028934	4930452B06Rik	203.42	13.3	37.35	74430	4933406L09Rik|AI854000
chr11	102162585	102164167	MACS_peak_24896	203.23	1582	ENSMUST00000021297	Lsm12	203.23	4.71	37.35	268490	1110032E16Rik|1110059P07|2600001B17Rik
chrX	99136129	99137013	MACS_peak_150031	202.61	884	NM_010110	Efnb1	202.61	5.51	37.38	13641	Cek5-L|EFL-3|Elk-L|Epl2|Eplg2|LERK-2|Lerk2|Stra1
chr10	80386660	80387659	MACS_peak_16409	202.56	999	ENSMUST00000105350	Mex3d	202.56	5.11	34.09	237400	BC059858|Rkhd1
chr7	19591992	19592609	MACS_peak_160302	202.51	617	uc009fmn.1	Clasrp	202.51	11.34	26.4	53609	Clasp|Sfrs16|Srsf16|Swap2
chr17	83224194	83224879	MACS_peak_83511	202.25	685	NM_134117	Pkdcc	202.25	7.9	26.44	106522	AI115348|AW548124|Adtk1|ESTM17|MAd1|Sgk493|Vlk|X83346
chr17	29887446	29888629	MACS_peak_68346	202.24	1183	ENSMUST00000171691	Mdga1	202.24	8.46	34.09	74762	1200011I03Rik|GPIM|Mamdc3
chr16	15887285	15888452	MACS_peak_53812	202.11	1167	NM_007679	Cebpd	202.11	6.31	37.43	12609	c/EBPdelta
chr6	136808247	136809086	MACS_peak_158396	201.76	839	NM_177688	H2afj	201.76	3.46	26.46	232440	E130307C13
chr13	107414170	107414767	MACS_peak_39253	201.56	597	ENSMUST00000061241	Apoo-ps	201.56	14.33	37.47	621156	Apoo|EG621156
chr7	30186941	30187533	MACS_peak_138702	201.55	592	NM_009795	Capns1	201.55	5.3	34.18	12336	Capa-4|Capa4|Capn4|D7Ertd146e
chr7	28787916	28788497	MACS_peak_138479	201.31	581	NM_022432	Sirt2	201.31	3.85	34.18	64383	5730427M03Rik|SIR2L2|Sir2l
chr13	19619293	19619830	MACS_peak_34982	201.22	537	NM_134065	Epdr1	201.22	4.98	37.52	105298	AU040950|AV006210|Epdm2|Epdr2|MERP-1|MERP-2|MERP2|Ucc1
chr14	57916279	57917375	MACS_peak_56778	201.2	1096	NM_028643	Micu2	201.2	5.74	26.51	68514	1110008L20Rik|4833427E09Rik|AU041871|Efha1|Smhs2
chr3	37311965	37312446	MACS_peak_97498	201.16	481	ENSMUST00000140956	Cetn4	201.16	15.65	34.17	207175	-
chr6	23838794	23839377	MACS_peak_128507	200.96	583	NM_153163	Cadps2	200.96	9.23	34.17	320405	A230044C21Rik|Caps-2|Caps2|Cpd2
[truncated: 2,048 more rows]

## Sheet: OGDR1.5h-m1A_mRNA
Chromosome	Transcript start	Transcript end	Peak ID	Score	Peak length	Transcript ID	Gene name	P value (-log10)	Fold enrichment	FDR	Gene ID	Synonyms
chr15	12833828	12834662	MACS_peak_63573	3233.06	834	NM_026799	Drosha	3233.06	9.7	0	14000	1110013A17Rik|AI874853|Etohi2|Rn3|Rnasen
chr5	120710054	120710975	MACS_peak_150291	3228.29	921	NM_008052	Dtx1	3228.29	24.15	0	14357	Fxit1|mKIAA4160
chr17	35155365	35157207	MACS_peak_82988	3220.51	1842	NM_020027	Prrc2a	3220.51	9.42	0	53761	3110039B05Rik|Bat-2|Bat2|D17H6S51E|G2|Wbp12|mKIAA4178
chr8	22937988	22942623	MACS_peak_180923	3217.04	4635	NM_001081149	Kat6a	3217.04	21.43	0	244349	1500036M03|9930021N24Rik|MOZ|Myst3|Zfp220
chrX	162760371	162760707	MACS_peak_187241	3204.51	336	NM_009031	Rbbp7	3204.51	12.85	0	245688	AA409861|AI173248|AU019541|BB114024|mRbAp46
chr6	34745618	34746639	MACS_peak_153969	3204.15	1021	ENSMUST00000115027	Cald1	3204.15	10.09	25	109624	4833423D12Rik|AI195384|AV071549|AW536160|C920027I18Rik
chr5	140419304	140419826	MACS_peak_153432	3199.88	522	NM_133916	Eif3b	3199.88	8.6	0	27979	AL033316|AL033334|AL033369|AW208965|D5Wsu45e|EIF3-ETA|EIF3-P110|EIF3-P116|Eif3s9|PRT1
chr11	107131273	107132127	MACS_peak_31453	3193.84	854	ENSMUST00000106762	Bptf	3193.84	26.2	0	207165	9430093H17Rik|Falz
chr1	93343098	93343711	MACS_peak_6638	3166.65	613	ENSMUST00000027494	Ppp1r7	3166.65	44.48	6.25	66385	2310014J01Rik|SDS22
chrX	74304997	74305441	MACS_peak_204189	3165.89	444	ENSMUST00000015435	Gdi1	3165.89	18.41	5.88	14567	GDIA|GDIalpha
chrX	74303730	74304689	MACS_peak_199627	3152.29	959	uc029xkr.1	Atp6ap1	3152.29	33.27	12.5	54411	16A|AC45|AI316502|AW108110|Atp6ip1|Atp6s1|C7-1|CF2|VATPS1|XAP-3|mFLJ00383
chrX	152341539	152342484	MACS_peak_202344	3148.01	945	NM_029836	Tspyl2	3148.01	20.06	11.11	52808	CDA1|CINAP|DENTT|DXBwg1396e|DXHXS1008E|E130307F10Rik
chr5	130448791	130449458	MACS_peak_137014	3147.44	667	NM_021371	Caln1	3147.44	28.04	9.09	140904	9630012C17Rik|Cabp8|MNCb-0849
chr7	141010396	141010770	MACS_peak_174601	3144.78	374	ENSMUST00000026565	Ifitm3	3144.78	20.28	10	66141	1110004C05Rik|Cd225|Cdw217|DSPA2b|Fgls|IP15|mil-1
chr16	44139808	44140111	MACS_peak_74823	3139.35	303	NM_028108	Naa50	3139.35	24.97	7.69	72117	2600005K24Rik|2810441M03Rik|AW112078|Mak3|Mak3p|Nat13|Nat5|San
chr19	8871495	8871912	MACS_peak_86484	3138.37	417	uc008gno.1	Ubxn1	3138.37	8.49	8.33	225896	2B28|4930455J02Rik|D19Ertd721e|T25529
chr12	108792972	108794091	MACS_peak_45400	3138.31	1119	ENSMUST00000021692	Yy1	3138.31	19.92	4.76	22632	AW488674|NF-E1
chr14	68119608	68121384	MACS_peak_59716	3137.72	1776	NM_008691	Nefm	3137.72	14.43	4.55	18040	NF-M|NF160|NF165|Nef3|Nfm
chr17	84184117	84187156	MACS_peak_86582	3128.96	3039	NM_001001806	Zfp36l2	3128.96	20.74	4.17	12193	Brf2|ERF2|Tis11d
chr13	49146551	49147234	MACS_peak_44935	3128.01	683	NM_029361	Wnk2	3128.01	21.76	6.25	75607	1810073P09Rik|AW122246|ESTM15|X83337|mKIAA1760
chr11	94991034	94992918	MACS_peak_32562	3121.18	1884	ENSMUST00000038696	Ppp1r9b	3121.18	16.35	5.56	217124	SPL|Spn
chr16	90229217	90230244	MACS_peak_70990	3117.31	1027	NM_178923	Scaf4	3117.31	15.43	5.88	224432	AA517739|Sfrs15|Sra4|Srsf15
chr5	30888940	30889664	MACS_peak_142827	3111.82	724	uc008wwd.1	Agbl5	3111.82	63.92	3.45	231093	4930455N08|9430057O19Rik|CCP5
chr1	30803485	30805942	MACS_peak_1512	3100	2457	NM_001081080	Phf3	3100	40.3	5.87	213109	2310061N19Rik|mKIAA0244
chr1	37998009	37998324	MACS_peak_2191	3100	315	NM_198303	Eif5b	3100	24.6	5.87	226982	A030003E17Rik|BC018347|IF2
chr1	86350265	86350696	MACS_peak_5733	3100	431	NM_010880	Ncl	3100	12.78	5.87	17975	B530004O11Rik|C23|D0Nds28|D1Nds28|Nucl
chr1	86529964	86530671	MACS_peak_5739	3100	707	NM_008972	Ptma	3100	26.5	5.87	19231	Thym
chr1	91501004	91501424	MACS_peak_6424	3100	420	NM_028718	Traf3ip1	3100	35.51	5.87	74019	3930402D05Rik|AU041749|MIP-T3
chr1	153455836	153456753	MACS_peak_9902	3100	917	NM_007842	Dhx9	3100	84.77	5.87	13211	AI326842|Ddx9|HEL-5|NDHII|RHA|mHEL-5
chr1	156366039	156366484	MACS_peak_10208	3100	445	ENSMUST00000102782	Gm2000	3100	23.55	5.87	100038991	-
chr1	162710282	162710829	MACS_peak_10993	3100	547	NM_001081290	Prrc2c	3100	17.66	5.87	226562	1810043M20Rik|9630039I18Rik|A630006J20|Bat2d|Bat2d1|Bat2l2|E130112L15Rik|Prrc3|mKIAA1096
chr1	178336952	178337797	MACS_peak_12322	3100	845	ENSMUST00000037748	Hnrnpu	3100	16.3	5.87	51810	AA408410|AI256620|AL024194|AL024437|AW557595|C86794|Hnrpu|SAFA|Sp120|hnRNP U
chr10	4353141	4357939	MACS_peak_13923	3100	4798	NM_031185	Akap12	3100	8.73	5.87	83397	AI317366|SSeCKS|Srcs5|Tsga12
chr10	13127141	13129658	MACS_peak_14724	3100	2517	NM_009538	Plagl1	3100	22.06	5.87	22634	Lot1|Zac1
chr10	25501823	25502387	MACS_peak_15463	3100	564	NM_013511	Epb4.1l2	3100	13.26	5.87	NA	NA
chr10	34282189	34284287	MACS_peak_16108	3100	2098	NM_009433	Tspyl1	3100	25.82	5.87	22110	Tspyl
chr10	63017028	63018742	MACS_peak_18174	3100	1714	NM_027425	Rufy2	3100	18.05	5.87	70432	2610111M19Rik|AI844453|Denn|LZ-FYVE|ZFYVE13
chr10	78404924	78405286	MACS_peak_19608	3100	362	NM_010925	Rrp1	3100	12.99	5.87	18114	AL033305|AL033306|AU018604|NNP-1|Nnp1
chr10	80399121	80399550	MACS_peak_19861	3100	429	ENSMUST00000092295	Mbd3	3100	39.15	5.87	17192	AI181826|AU019209
chr10	93889537	93889891	MACS_peak_21558	3100	354	NM_019648	Metap2	3100	15.79	5.87	56307	4930584B20Rik|A930035J23Rik|AI047573|AL024412|AU014659|Amp2|Mnpep|p67|p67eIF2
chr10	127620617	127621148	MACS_peak_23942	3100	531	NM_008512	Lrp1	3100	29	5.87	16971	A2mr|AI316852|CD91|Lrp|b2b1554Clo
chr11	6404989	6406132	MACS_peak_24747	3100	1143	NM_028601	Zmiz2	3100	12.87	5.87	52915	Zimp7
chr11	6469436	6476076	MACS_peak_24759	3100	6640	NM_011221	Purb	3100	30.14	5.87	19291	2310015K15Rik|AA114818|Cager-2|D11Bwg0414e
chr11	31870939	31873412	MACS_peak_26148	3100	2473	NM_026252	Cpeb4	3100	26.43	5.87	67579	Cpe-bp4|Cpeb-4|mCPEB-4
chr11	35979970	35980527	MACS_peak_26612	3100	557	ENSMUST00000018993	Wwc1	3100	11.95	5.87	211652	AA408228|AU017197|BC037006|Kibra|mKIAA0869
chr11	49712353	49712723	MACS_peak_27407	3100	370	ENSMUST00000145353	Cnot6	3100	36.41	5.87	104625	CCR4
chr11	52098680	52099150	MACS_peak_27737	3100	470	ENSMUST00000020608	Ppp2ca	3100	29.45	5.87	19052	PP2A|R75353
chr11	52403045	52403588	MACS_peak_27765	3100	543	uc007ivn.1	9530068E07Rik	3100	15.68	5.87	213673	C85061|Kct2
chr11	69090649	69092384	MACS_peak_29668	3100	1735	ENSMUST00000021273	Vamp2	3100	14.37	5.87	22318	Syb-2|Syb2|sybII
chr11	69733996	69735566	MACS_peak_29761	3100	1570	ENSMUST00000058470	Polr2a	3100	11.53	5.87	20020	220kDa|Rpb1|Rpo2-1
chr11	77686138	77686507	MACS_peak_30796	3100	369	NM_001024205	Nufip2	3100	27.46	5.87	68564	1110001M19Rik|9530056D24Rik|AI256692|AI461731|PIG1|mKIAA1321
chr11	83504641	83505104	MACS_peak_31693	3100	463	NM_027427	Taf15	3100	78.03	5.87	70439	2610111C21Rik|68kDa|TAFII68|Taf2n
chr11	98809696	98810091	MACS_peak_33422	3100	395	ENSMUST00000017384	Casc3	3100	26.14	5.87	192160	Btz|Mln51
chr11	112782209	112783015	MACS_peak_35218	3100	806	NM_011448	Sox9	3100	11.32	5.87	20682	2010306G03Rik|AV220920|mKIAA4243
chr11	120578024	120579430	MACS_peak_36855	3100	1406	NM_133796	Arhgdia	3100	10.13	5.87	192662	5330430M07Rik|Gdi-1|Rho-GDI|RhoDGI|RhoGDI-1
chr12	27340333	27342718	MACS_peak_38685	3100	2385	NM_009234	Sox11	3100	9.13	5.87	20666	1110038H03Rik|6230403H02Rik|AI836553|end1
chr12	29811372	29811734	MACS_peak_38866	3100	362	NM_008666	Myt1l	3100	34.92	5.87	17933	2900046C06Rik|2900093J19Rik|C630034G21Rik|Nztf1|Pmng1|Png-1|mKIAA1106
chr12	59071425	59072863	MACS_peak_40723	3100	1438	NM_008891	Pnn	3100	20.33	5.87	18949	AU045199|D12Ertd512e
chr12	102562597	102563073	MACS_peak_44788	3100	476	NM_007693	Chga	3100	21.31	5.87	12652	ChrA|cgA
chr13	54598494	54598833	MACS_peak_50039	3100	339	uc007qoo.1	Cltb	3100	13.83	5.87	74325	2310046E19Rik
chr13	58126862	58128556	MACS_peak_50402	3100	1694	NM_029872	Hnrnpa0	3100	10.25	5.87	77134	1110055B05Rik|3010025E17Rik|Hnrpa0|hnRNP A0
chr13	99429211	99435701	MACS_peak_52858	3100	6490	NM_008634	Map1b	3100	9.15	5.87	17755	A230055D22|AI843217|LC1|MAP5|Mtap-5|Mtap1b|Mtap5
chr14	31176329	31177712	MACS_peak_56874	3100	1383	NM_022656	Nisch	3100	17.79	5.87	64652	1200007D05Rik|3202002H23Rik|AW494485|I-1
chr14	49172597	49173417	MACS_peak_58155	3100	820	ENSMUST00000037362	Naa30	3100	45.03	5.87	70646	4930487N19Rik|5730533P17Rik|AI447922|AW322455|Nat12
chr14	54642160	54643048	MACS_peak_58392	3100	888	NM_019567	Acin1	3100	17.49	5.87	56215	2610036I19Rik|2610510L13Rik|Acinus|Acn|C79325|acinusL|acinusS|mKIAA0670
chr14	54894601	54894962	MACS_peak_58435	3100	361	ENSMUST00000139985	Pabpn1	3100	20.88	5.87	54196	PAB2|Pabp3|mPABII
chr14	69705133	69705878	MACS_peak_59849	3100	745	NM_001146012	R3hcc1	3100	30.16	5.87	71843	1700020M16Rik|AA407796
chr14	75323223	75323874	MACS_peak_60271	3100	651	NM_026083	Zc3h13	3100	13.23	5.87	67302	2600010B19Rik|3110050K21Rik|4930570G11Rik|C87618
chr15	25363300	25364918	MACS_peak_63792	3100	1618	NM_027395	Basp1	3100	23.79	5.87	70350	2610024P12Rik|CAP-23|CAP23|Ckap3|NAP-22|NAP22
chr15	81399484	81400043	MACS_peak_68329	3100	559	ENSMUST00000172107	St13	3100	31.02	5.87	70356	1110007I03Rik|3110002K08Rik|AW555194|HIP|HOP|HSPABP|HSPABP1|PRO0786|SNC6|p48
chr15	98737620	98740494	MACS_peak_70434	3100	2874	ENSMUST00000053183	Arf3	3100	58.79	5.87	11842	5430400P17Rik|AI854770
chr15	103244255	103245182	MACS_peak_71159	3100	927	uc007xxp.2	Hnrnpa1	3100	26.12	5.87	15382	HDP-1|Hdp|Hnrpa1|hnRNP A1|hnrnp-A1
chr16	8830099	8830685	MACS_peak_72094	3100	586	NM_001081400	1810013L24Rik	3100	18.41	5.87	69053	1110017P05Rik|3010002C02Rik|AA792997|AW124177|Gm19906|R74903
chr16	24529313	24530784	MACS_peak_73793	3100	1471	uc029swq.1	A730098P11Rik	3100	35.3	5.87	NA	NA
chr16	33726300	33727596	MACS_peak_74617	3100	1296	NM_175256	Heg1	3100	14.87	5.87	77446	4632417D23Rik|5530401I02Rik|9530025L16Rik|BC038614|Gm629|OTTMUSG00000027315
chr16	42291798	42292366	MACS_peak_75861	3100	568	NM_008083	Gap43	3100	9.61	5.87	14432	B-50|Basp2|GAP-43
chr16	44138961	44139305	MACS_peak_76090	3100	344	ENSMUST00000114666	Atp6v1a	3100	35.27	5.87	11964	AI647066|Atp6a1|Atp6a2|Atp6v1a1|VA68|VPP2
chr17	24936536	24936977	MACS_peak_81203	3100	441	NM_013931	Mapk8ip3	3100	22.41	5.87	30957	BB120594|D17Wsu15e|JIP-3|JSAP1|JSAP1a|JSAP1b|JSAP1c|JSAP1d|Jip3|Syd2|mKIAA1066
chr17	33677081	33677440	MACS_peak_82760	3100	359	uc008bzh.2	Hnrnpm	3100	15.9	5.87	76936	2610023M21Rik|AA409009|Hnrpm|mKIAA4193
chr17	53479233	53479608	MACS_peak_84236	3100	375	NM_025887	Rab5a	3100	44.7	5.87	271457	2410015H04Rik|AI663973|AU021172|nnyRab5a
chr17	57043710	57045663	MACS_peak_84599	3100	1953	NM_025877	Slc25a23	3100	17.41	5.87	66972	2310067G05Rik|SCaMC-3
chr17	80061656	80062334	MACS_peak_86220	3100	678	uc008dqk.1	Hnrnpll	3100	28.23	5.87	72692	2510028H02Rik|2810036L13Rik|AI256697|AI852082|Hnrpll
chr18	25753341	25753983	MACS_peak_89175	3100	642	NM_133195	Celf4	3100	86.35	5.87	108013	A230070D14Rik|BRUNOL-4|Brul4|Brunol4|C130060B05Rik
chr19	5425936	5427294	MACS_peak_94973	3100	1358	NM_001256515	AI837181	3100	17.5	5.87	107242	Bles03|N28173
chr19	8819400	8820813	MACS_peak_95514	3100	1413	NM_001081196	Hnrnpul2	3100	29.47	5.87	68693	1110031M08Rik|AI465155|Hnrpul2
chr19	9982367	9982983	MACS_peak_95601	3100	616	uc008got.2	Fth1	3100	12.76	5.87	14319	FHC|Fth|HFt|MFH
chr19	45659775	45660312	MACS_peak_98505	3100	537	ENSMUST00000046869	Fbxw4	3100	27.45	5.87	30838	Dac|Fbw4|SHFM3|SHSF3|dactylin|dactylyn
chr19	45782931	45783520	MACS_peak_98516	3100	589	ENSMUST00000026243	Mgea5	3100	21.3	5.87	76055	2810009A20Rik|4833427O07Rik|5830447M11Rik|AA408215|Hy5|Ncoat|OGA|mKIAA0679
chr19	47733518	47733911	MACS_peak_98890	3100	393	NM_026377	Sfr1	3100	18.06	5.87	67788	6330577E15Rik|Meir5
chr19	60766333	60766995	MACS_peak_99985	3100	662	NM_010123	Eif3a	3100	16.13	5.87	13669	A830012B05Rik|Csma|Eif3|Eif3s10|mKIAA0139
chr2	5957470	5957850	MACS_peak_100558	3100	380	NM_001081132	Upf2	3100	22.55	5.87	326622	-
chr2	30070918	30072484	MACS_peak_102726	3100	1566	NM_023871	Set	3100	27.24	5.87	56086	2610030F17Rik|5730420M11Rik|AA407739|I-2PP2A|StF-IT-1|TAF-I
chr2	44987774	44989153	MACS_peak_104501	3100	1379	NM_015753	Zeb2	3100	24.07	5.87	24136	9130203F04Rik|D130016B08Rik|SIP1|Zfhx1b|Zfx1b|Zfxh1b
chr2	69749271	69750439	MACS_peak_106119	3100	1168	NM_001081086	Ppig	3100	11.92	5.87	228005	AU019516|AU022200|B230312B02Rik|CYP|SRCyp
chr2	102400012	102400900	MACS_peak_108235	3100	888	NM_020267	Trim44	3100	53.99	5.87	80985	Dipb|Mc7
chr2	113847960	113848661	MACS_peak_109053	3100	701	NM_181416	Arhgap11a	3100	25.47	5.87	228482	6530401L14Rik|mKIAA0013
chr2	121469778	121470316	MACS_peak_109834	3100	538	NM_001081975	Mfap1b	3100	25.87	5.87	100034361	-
chr2	121502331	121502869	MACS_peak_109840	3100	538	NM_026220	Mfap1a	3100	22.28	5.87	67532	4432409M24Rik|Mfap1
chr2	132792329	132794095	MACS_peak_111053	3100	1766	NM_007694	Chgb	3100	11.83	5.87	12653	Scg-1
chr2	143988147	143990266	MACS_peak_111858	3100	2119	NM_024281	Rrbp1	3100	36	5.87	81910	1700087N07Rik|5730465C04Rik|ES/130|mKIAA1398|mRRp0|mRRp1.8|mRRp10|mRRp15a|mRRp15b|mRRp16.8|mRRp2|mRRp41|mRRp47|mRRp5.4|p180
chr2	148875152	148875576	MACS_peak_112254	3100	424	ENSMUST00000028938	Cst3	3100	8.15	5.87	13010	CysC
chr2	154657017	154657371	MACS_peak_112866	3100	354	ENSMUST00000044277	Chmp4b	3100	19.5	5.87	75608	2010012F05Rik|C76846|Snf7-2
chr2	154892396	154892795	MACS_peak_112903	3100	399	ENSMUST00000161172	Eif2s2	3100	19.08	5.87	67204	2810026E11Rik|38kDa|AA408636|AA571381|AA986487|AW822225|D2Ertd303e|EIF2|EIF2B
chr2	161052387	161052905	MACS_peak_113844	3100	518	NM_173368	Chd6	3100	19.17	5.87	71389	5430439G14Rik|6330406J24Rik|CHD-6
chr3	9609269	9610085	MACS_peak_116659	3100	816	NM_133218	Zfp704	3100	33.93	5.87	170753	C030026M03|C030034L19Rik|Gig1|Znf704
chr3	30818499	30820355	MACS_peak_117839	3100	1856	NM_027016	Sec62	3100	31.84	5.87	69276	3100002M17Rik|AI844545|AW545092|Dtrp1|HTP1|Tloc1
chr3	41082594	41083046	MACS_peak_118689	3100	452	NM_027558	Pgrmc2	3100	34.24	5.87	70804	4631434O19Rik|5730409G06Rik|DG6|PMBP
chr3	54481428	54482727	MACS_peak_119202	3100	1299	ENSMUST00000091130	Gm5641	3100	175.29	5.87	434807	EG434807
chr3	56182971	56183701	MACS_peak_119513	3100	730	NM_030595	Nbea	3100	15.15	5.87	26422	Lyst2|mKIAA1544
chr3	87975420	87980451	MACS_peak_121224	3100	5031	NM_016701	Nes	3100	9.02	5.87	18008	AA166324|C78523|ESTM46
chr3	88054957	88055955	MACS_peak_121234	3100	998	NM_025663	Gpatch4	3100	24.7	5.87	66614	2610029K21Rik|Gpatc4
chr3	108012249	108012778	MACS_peak_123380	3100	529	NM_010358	Gstm1	3100	11.14	5.87	14862	Gstb-1|Gstb1
chr3	108902940	108904762	MACS_peak_123527	3100	1822	NM_025845	Prpf38b	3100	17.41	5.87	66921	1110021E09Rik|AU018955
chr3	145576207	145576996	MACS_peak_125518	3100	789	NM_001081094	Znhit6	3100	24.2	5.87	229937	2410019A14Rik
chr4	106911469	106911912	MACS_peak_133550	3100	443	NM_023672	Ssbp3	3100	23.73	5.87	72475	2610021L12Rik|2610200M23Rik|5730488C10Rik|AI854733|AW551939|LAST|SSDP1
chr4	109013509	109013840	MACS_peak_133908	3100	331	NM_146150	Nrd1	3100	10.21	5.87	230598	2600011I06Rik|AI875733|NRD-C|Nrdc
chr4	119294203	119294604	MACS_peak_134745	3100	401	ENSMUST00000079644	Ybx1	3100	10.58	5.87	22608	1700102N10Rik|C79409|EF1A|MSY1|Nsep1|YB-1|dbpB|mYB-1a
chr4	126177861	126178557	MACS_peak_135544	3100	696	NM_146153	Thrap3	3100	16.14	5.87	230753	9330151F09Rik|B230333E16Rik|Trap150
chr4	126232239	126232766	MACS_peak_135554	3100	527	NM_144941	Map7d1	3100	22.47	5.87	245877	AV028413|BC019977|Mtap7d1|Parcc1|Rprc1|mKIAA1187
chr4	129820220	129820601	MACS_peak_136311	3100	381	ENSMUST00000030578	Ptp4a2	3100	23.31	5.87	19244	Prl-2
chr4	130818581	130819204	MACS_peak_136530	3100	623	NM_011520	Sdc3	3100	13.69	5.87	20970	Synd3|mKIAA0468|syn-3
chr4	133720549	133720999	MACS_peak_136968	3100	450	NM_001080819	Arid1a	3100	21.54	5.87	93760	1110030E03Rik|BAF250a|Osa1|Smarcf1
chr4	150406195	150406664	MACS_peak_139311	3100	469	NM_001085492	Rere	3100	20.57	5.87	68703	1110033A15Rik|AI414665|ARG|ARP|ATN1L|AW742570|Atr2|DNB1|eye<m03Jus>|eyes3|mKIAA0458
chr4	152338650	152339030	MACS_peak_139709	3100	380	NM_029216	Chd5	3100	21.55	5.87	269610	4930532L22Rik|AW060752|B230399N07Rik|CHD-5
chr5	16730639	16731074	MACS_peak_141084	3100	435	ENSMUST00000073014	Gm8991	3100	82.6	5.87	668131	EG668131
chr5	29434663	29435643	MACS_peak_142629	3100	980	ENSMUST00000001611	Nom1	3100	26.59	5.87	433864	D5Kng1|Gm1040
chr5	31202667	31203284	MACS_peak_142891	3100	617	NM_008014	Ppm1g	3100	47.51	5.87	14208	AI385652|Fin13
chr5	33018815	33019154	MACS_peak_143144	3100	339	NM_011738	Ywhah	3100	31	5.87	22629	-
chr5	36484587	36486412	MACS_peak_143747	3100	1825	NM_025725	Ccdc96	3100	16.35	5.87	66717	4921513E08Rik
chr5	52184512	52184903	MACS_peak_144718	3100	391	NM_007839	Dhx15	3100	21.44	5.87	13204	DBP1|DEAH9|Ddx15|HRH2|mDEAH9
chr5	65536788	65537184	MACS_peak_145260	3100	396	ENSMUST00000149167	Smim14	3100	64.14	5.87	68552	1110003E01Rik|1700127H04Rik|5430439C17Rik|MAd4
chr5	74591773	74592192	MACS_peak_146096	3100	419	uc008xtm.2	Fip1l1	3100	20.78	5.87	66899	1300019H17Rik|Rje
chr5	76856330	76859154	MACS_peak_146342	3100	2824	ENSMUST00000121160	C530008M17Rik	3100	18.16	5.87	320827	2810489J07Rik|4930529A19Rik|4931405B09Rik|Kiaa1211|mKIAA1211
chr5	86816906	86817333	MACS_peak_146748	3100	427	NM_177680	Ythdc1	3100	22.37	5.87	231386	A730098D12Rik|C80342|mKIAA1966
chr5	90365666	90366185	MACS_peak_146969	3100	519	NM_030886	Ankrd17	3100	58.16	5.87	81702	4933425K22Rik|A130069E23Rik|A930008M01|AA407558|AA516750|AU040470|Foe|Gtar|Mask|mKIAA0697
chr5	99978391	99978938	MACS_peak_147550	3100	547	NM_007516	Hnrnpd	3100	38.97	5.87	11991	Auf1|Hnrpd
chr5	104092377	104093373	MACS_peak_148015	3100	996	NM_010097	Sparcl1	3100	10.34	5.87	13602	Ecm2|Sc1|hevin|mast9
chr5	113771320	113771649	MACS_peak_149244	3100	329	NM_016926	Sart3	3100	30.36	5.87	53890	AU045857|mKIAA0156
chr5	115272256	115272898	MACS_peak_149547	3100	642	ENSMUST00000112097	Rnf10	3100	11.08	5.87	50849	AA675014|RIE2|mKIAA0262
chr5	115300512	115300912	MACS_peak_149555	3100	400	ENSMUST00000112090	Dynll1	3100	23.17	5.87	56455	Dlc8|Dnclc1|Pin
chr5	117115671	117115993	MACS_peak_149832	3100	322	NM_178622	Suds3	3100	22.91	5.87	71954	2400003N08Rik|2410008L21Rik|AU067672|mSds3
chr5	122158277	122158615	MACS_peak_150597	3100	338	ENSMUST00000102528	Ppp1cc	3100	21.83	5.87	19047	PP-1G|PP1|dis2m1
chr5	123158392	123158944	MACS_peak_150830	3100	552	NM_001040398	Setd1b	3100	18.9	5.87	208043	AA516740|BC035291|KMT2G|mKIAA1076
chr5	125385965	125388264	MACS_peak_151330	3100	2299	NM_019639	Ubc	3100	4.49	5.87	22190	2700054O04Rik|AI194771|Rps27a|TI-225|Uba52|Ubb
chr6	51461919	51463254	MACS_peak_158365	3100	1335	ENSMUST00000114459	Hnrnpa2b1	3100	18.01	5.87	53379	9130414A06Rik|Hnrpa2|Hnrpa2b1|hnrnp-A
chr6	58905892	58907126	MACS_peak_158942	3100	1234	NM_021432	Nap1l5	3100	12.94	5.87	58243	1110020M21Rik
chr6	67272138	67273527	MACS_peak_159338	3100	1389	uc009cfi.1	Serbp1	3100	10.54	5.87	66870	1200009K13Rik|9330147J08Rik|AL022786|Pairbp1
chr6	86404218	86404522	MACS_peak_160640	3100	304	NM_011585	Tia1	3100	180.98	5.87	21841	2310050N03Rik|AI256674|TIA-1|mTIA-1
chr6	124746019	124747989	MACS_peak_164220	3100	1970	NM_007881	Atn1	3100	14.38	5.87	13498	Atr1|Drpla|atrophin-1
chr6	124913674	124914232	MACS_peak_164249	3100	558	NM_026988	Ptms	3100	29.54	5.87	69202	2610009E16Rik
chr6	140623498	140624344	MACS_peak_165368	3100	846	ENSMUST00000087614	Aebp2	3100	37.59	5.87	11569	AU023766|B230313N05Rik
chr7	13037620	13038273	MACS_peak_166619	3100	653	ENSMUST00000005714	Ube2m	3100	23.72	5.87	22192	2510040H03Rik|UBC12|Ubc-rs2
chr7	16915378	16916976	MACS_peak_166918	3100	1598	NM_007590	Calm3	3100	20.39	5.87	12315	CaMA|R75142
chr7	16944681	16948828	MACS_peak_166922	3100	4147	NM_001099636	Pnmal2	3100	13.86	5.87	434128	EG434128
chr7	19004064	19006763	MACS_peak_167002	3100	2699	NM_178757	Irf2bp1	3100	45.8	5.87	272359	6330414O09Rik|C530033F24
chr7	24515036	24515682	MACS_peak_167349	3100	646	NM_175142	Zfp428	3100	12.04	5.87	232969	2410005H09Rik|AV271806|AW047854|Znf428
chr7	25237377	25237851	MACS_peak_167476	3100	474	NM_001031667	Gsk3a	3100	16.85	5.87	606496	2700086H06Rik
chr7	25293167	25294159	MACS_peak_167492	3100	992	NM_027882	Cic	3100	14.44	5.87	71722	1200010B10Rik|mKIAA0306
chr7	25754340	25754730	MACS_peak_167599	3100	390	ENSMUST00000043765	Hnrnpul1	3100	31.54	5.87	232989	E130317O14Rik|E1B-AP5|E1BAP5|Hnrnpul|Hnrpul1
chr7	28338351	28338706	MACS_peak_167913	3100	355	uc009fyi.1	Supt5	3100	28.65	5.87	20924	AL033283|AL033321|AU019549|Spt5|Supt5h
chr7	28399521	28401617	MACS_peak_167926	3100	2096	NM_175021	Samd4b	3100	31.68	5.87	233033	BC042901
chr7	28810671	28811168	MACS_peak_167984	3100	497	ENSMUST00000174548	Hnrnpl	3100	34.61	5.87	15388	C79783|D830027H13Rik|Hnrpl
chr7	45376453	45377278	MACS_peak_169296	3100	825	NM_009224	Snrnp70	3100	28.12	5.87	20637	2700022N21Rik|3200002N22Rik|AI325098|R74807|Rnu1p70|Rnulp70|Snrp70|Srnp70|U1-70|U1-70K
chr7	45798198	45798593	MACS_peak_169382	3100	395	NM_001005511	Lmtk3	3100	45.31	5.87	381983	BC059845|aatyk3
chr7	73417316	73419868	MACS_peak_171567	3100	2552	NM_177740	Rgma	3100	11.22	5.87	244058	BC059072|C230063O06
chr7	74554410	74554780	MACS_peak_171735	3100	370	NM_023908	Slco3a1	3100	42.88	5.87	108116	5830414C08Rik|Anr1|MJAM|OATP-D|R75096|Slc21a11
chr7	99345434	99346422	MACS_peak_173923	3100	988	NM_009825	Serpinh1	3100	18.36	5.87	12406	BERF-1|Cbp1|Cbp2|Hsp47|J6|Serpinh2|gp46
chr7	133708923	133709295	MACS_peak_177613	3100	372	NM_001302085	Uros	3100	66.2	5.87	22276	AI415298|UROIIIS|Uros3
chr8	8689976	8690537	MACS_peak_179031	3100	561	NM_176849	Arglu1	3100	13.21	5.87	234023	9430010O03Rik|C130008N12
chr8	57513965	57514338	MACS_peak_183021	3100	373	NM_008252	Hmgb2	3100	17.3	5.87	97165	C80539|HMG-2|Hmg2
chr8	70698847	70700616	MACS_peak_184062	3100	1769	NM_010592	Jund	3100	12.05	5.87	16478	Jund1
chr8	72304718	72305276	MACS_peak_184305	3100	558	ENSMUST00000075602	Gm10282	3100	21.47	5.87	100042405	ENSMUSG00000069996
chr8	84704711	84708677	MACS_peak_185404	3100	3966	NM_010906	Nfix	3100	14.46	5.87	18032	CTF|NF-I/X|NF1-X|NFI-X
chr8	84842070	84842844	MACS_peak_185449	3100	774	ENSMUST00000003912	Calr	3100	18.73	5.87	12317	CRT|Calregulin
chr8	85026832	85027234	MACS_peak_185497	3100	402	NM_026760	2310036O22Rik	3100	15.05	5.87	68544	1110002H14Rik|AI854688
chr8	94179822	94180327	MACS_peak_186335	3100	505	uc009mvx.2	Mt1	3100	7.36	5.87	17748	MT-I|Mt-1
chr8	111720378	111721331	MACS_peak_187738	3100	953	uc009nmw.2	Bcar1	3100	32.43	5.87	12927	AI385681|Cas|Crkas
chr8	112013432	112015036	MACS_peak_187805	3100	1604	ENSMUST00000071732	Gm6793	3100	30.07	5.87	627828	EG627828
chr8	120568160	120568483	MACS_peak_188775	3100	323	NM_198671	Gse1	3100	48.93	5.87	382034	2210013I18Rik|mKIAA0182
chr8	121578457	121578806	MACS_peak_188842	3100	349	NM_133765	Fbxo31	3100	227.01	5.87	76454	1110003O08Rik|2310046N15Rik|Fbx14|Fbxo14
chr8	122383399	122384004	MACS_peak_188979	3100	605	NM_001029993	Zc3h18	3100	24.69	5.87	76014	1190001B23Rik|5830416A07Rik|Nhn1
chr9	21424907	21425256	MACS_peak_191231	3100	349	NM_007871	Dnm2	3100	23.89	5.87	13430	Dyn2|Udnm|b2b2159Clo
chr9	62377553	62378812	MACS_peak_195866	3100	1259	ENSMUST00000085519	Anp32a	3100	45.75	5.87	11737	Anp32|I1PP2A|LANP|PHAP1|W91701|pp32
chr9	88482055	88482559	MACS_peak_198329	3100	504	ENSMUST00000069221	Syncrip	3100	30.85	5.87	56403	2610109K23Rik|4632417O19Rik|GRY-RBP|Nsap1|Nsap1l|pp68
chr9	103365053	103365732	MACS_peak_199450	3100	679	NM_175565	Cdv3	3100	12.04	5.87	321022	2510010F10Rik|C230084J24Rik|C79446|TPP36
chrX	7894518	7894867	MACS_peak_202165	3100	349	NM_019478	Pqbp1	3100	21.43	5.87	54633	PQBP-1|Sfc2|npw38
chrX	68678540	68678867	MACS_peak_203818	3100	327	NM_008031	Fmr1	3100	28.01	5.87	14265	FMRP|Fmr-1
chrX	109005003	109006071	MACS_peak_205656	3100	1068	NM_016710	Hmgn5	3100	9.17	5.87	50887	GARP45|NBP-45|Nsbp1
chrX	136066563	136067207	MACS_peak_206086	3100	644	ENSMUST00000049130	Bex2	3100	19.96	5.87	12069	AL024066|Bex1
chrX	136271262	136271897	MACS_peak_206098	3100	635	NM_009750	Ngfrap1	3100	14.81	5.87	12070	AL033356|Bex3|DXWsu67e|Gcap27|Nade
chrX	170010673	170011063	MACS_peak_207576	3100	390	ENSMUST00000180251	Gm21887	3100	18.15	5.87	NA	NA
chr1	38996140	38996499	MACS_peak_2408	3100	359	NM_026850	Pdcl3	3100	58.32	5.8	68833	1110061A19Rik|C80025|Viaf1
chr1	143702493	143702893	MACS_peak_9491	3100	400	ENSMUST00000018337	Cdc73	3100	25.9	5.8	214498	8430414L16Rik|C130030P16Rik|C81219|Hrpt2
chr10	10335702	10336028	MACS_peak_14522	3100	326	NM_001127353	Adgb	3100	22.26	5.8	215772	9130014G24Rik
chr10	91171037	91171619	MACS_peak_21395	3100	582	NM_011605	Tmpo	3100	15.82	5.8	21917	5630400D24Rik|AI195756|AI606875|AW214352|AW547477|LAP2|TP
chr11	30142119	30142422	MACS_peak_25824	3100	303	NM_009260	Sptbn1	3100	11.19	5.8	20742	9930031C03Rik|AL033301|SPTB2|Spnb-2|Spnb2|elf1|elf3|mKIAA4049
chr11	74723998	74724670	MACS_peak_30036	3100	672	ENSMUST00000021091	Pafah1b1	3100	44.81	5.8	18472	LIS-1|Lis1|MMS10-U|Mdsh|Ms10u|Pafaha
chr11	94328000	94328387	MACS_peak_32493	3100	387	NM_027799	Ankrd40	3100	19.43	5.8	71452	1110011C06Rik|5530600A18Rik|Gcap15
chr13	74767975	74768457	MACS_peak_50557	3100	482	uc011zby.2	Hnrnpa1l2	3100	73.21	5.8	NA	NA
chr14	70583294	70585183	MACS_peak_58983	3100	1889	NM_194345	Fam160b2	3100	59.15	5.8	239170	G430067P06Rik|Rai16
chr15	25780973	25781864	MACS_peak_62904	3100	891	NM_019472	Myo10	3100	14.79	5.8	17909	AW048724|D15Ertd600e|mKIAA0799
chr17	6738343	6739467	MACS_peak_78580	3100	1124	NM_009510	Ezr	3100	13.21	5.8	22350	AW146364|R75297|Vil2|p81
chr19	12501006	12501996	MACS_peak_94230	3100	990	NM_172442	Dtx4	3100	30.25	5.8	207521	AI449438|BC044798|D930042H13|RNF155
chr3	95945179	95947388	MACS_peak_119968	3100	2209	ENSMUST00000165307	Anp32e	3100	28.73	5.8	66471	2810018A15Rik|AI047746|AI326868|CPD1|LANP-L|LANPL|mLANP-L
chr3	96631688	96632127	MACS_peak_120070	3100	439	NM_025875	Rbm8a	3100	32.56	5.8	60365	2310057C03Rik|AA673428|Rbm8
chr3	158011890	158012203	MACS_peak_124191	3100	313	NM_001093752	Srsf11	3100	11.42	5.8	69207	0610009J05Rik|2610019N13Rik|BF642805|Sfrs11
chr4	40947721	40948294	MACS_peak_126176	3100	573	NM_009736	Bag1	3100	25.64	5.8	12017	BAG-1|Rap46
chr4	46472086	46472543	MACS_peak_127080	3100	457	ENSMUST00000102926	Anp32b	3100	37.21	5.8	67628	2410015B15Rik|PAL31|PHAPI2a|Ssp29
chr4	133534227	133534542	MACS_peak_134279	3100	315	NM_010948	Nudc	3100	8.48	5.8	18221	SIG-92|Silg92
chr4	134473331	134473843	MACS_peak_134416	3100	512	NM_019641	Stmn1	3100	11.15	5.8	16765	19k|Lag|Lap18|Op18|P18|P19|Pig|Pp17|Pp18|Pp19|Pr22|Smn
chr5	65537232	65537546	MACS_peak_142407	3100	314	ENSMUST00000142407	Ube2k	3100	51.66	5.8	53323	AW492011|D5Ertd601e|E2-25k|HIP-2|Hip2|Hypg|Lig
chr5	93167499	93167881	MACS_peak_144381	3100	382	uc008ydx.1	2022-09-11	3100	22.31	5.8	52398	6230410I01Rik|AW548875|D5Ertd606e
chr5	117773977	117774893	MACS_peak_147036	3100	916	ENSMUST00000180430	Ksr2	3100	39.4	5.8	333050	-
chr5	146470509	146472411	MACS_peak_151184	3100	1902	ENSMUST00000016143	Wasf3	3100	65.66	5.8	245880	Scar3|Wave3
chr7	3629551	3629929	MACS_peak_163021	3100	378	NM_023524	Tfpt	3100	25.43	5.8	69714	2400004F01Rik|AI450389|Amida|FB1
chr7	28398825	28399372	MACS_peak_164695	3100	547	NM_019458	Paf1	3100	35.8	5.8	54624	5730511K23Rik|AA675045
chr7	78902229	78902830	MACS_peak_168486	3100	601	NM_026531	Aen	3100	63.79	5.8	68048	2700083B06Rik|Isg20l1
chr7	126863168	126864250	MACS_peak_173261	3100	1082	NM_172746	Hirip3	3100	14.45	5.8	233876	B130036O03|C86302
chr8	109562443	109562783	MACS_peak_183477	3100	340	NM_178380	Dhx38	3100	16.25	5.8	64340	5730550P09Rik|AI325984|AW540902|Ddx38|Prp16|mKIAA0224
chr8	123420606	123422015	MACS_peak_185236	3100	1409	ENSMUST00000071134	Tubb3	3100	10.61	5.8	22152	3200002H15Rik|M(beta)3|M(beta)6
chr9	106891070	106891415	MACS_peak_195411	3100	345	ENSMUST00000069036	Manf	3100	23.05	5.8	74840	3230402M22Rik|AA407711|AA408789|AA673178|Armet|D17914|D18Mgi17
chrX	129749744	129750116	MACS_peak_201363	3100	372	NM_172493	Diap2	3100	23.36	5.8	NA	NA
chrX	166344552	166345081	MACS_peak_202948	3100	529	NM_001177955	Gpm6b	3100	11.31	5.8	14758	AI593561|Gpm6|M6B
chr11	97800333	97801114	MACS_peak_30275	3100	781	ENSMUST00000129828	Lasp1	3100	51.51	11.11	16796	AA408629|Def-4|SH3P6|Tg(Col1a1-lacZ)1Ngma
chr15	78428563	78428867	MACS_peak_61523	3100	304	NM_001289671	Kctd17	3100	23.54	11.11	72844	2900008M13Rik|AA414907|AW742389|N28155
chr18	20682591	20682963	MACS_peak_80196	3100	372	ENSMUST00000165229	Gm10269	3100	11.49	11.11	100040823	ENSMUSG00000069439
chr4	95049847	95052222	MACS_peak_119283	3100	2375	NM_010591	Jun	3100	10.03	11.11	16476	AP-1|Junc|c-jun
chr6	30304051	30304539	MACS_peak_141300	3100	488	NM_009459	Ube2h	3100	13.62	11.11	22214	1500009C23Rik|AI181839|AI326965|AI462483|AW227540|E2-20K|Gid3|N28148|Ubc8
chr16	35154876	35157235	MACS_peak_67881	3095.39	2359	ENSMUST00000114913	Adcy5	3095.39	28.7	11.09	224129	AW121902|Ac5
chr17	56597769	56599672	MACS_peak_84509	3090.41	1903	uc008dck.2	Safb	3090.41	18.02	5.86	224903	3110021E02Rik|5330423C17Rik|AU018122|D18386|E130307D12|HAP|HET|SAF-B1|SAFB1
chr16	4084047	4086198	MACS_peak_71310	3074.74	2151	NM_001025432	Crebbp	3074.74	12.21	5.85	12914	AW558298|CBP|CBP/p300|KAT3A|p300/CBP
chr8	117257018	117257401	MACS_peak_188133	3072.35	383	NM_001163262	Cmip	3072.35	17.34	5.84	74440	4933407C03Rik|5830471E12Rik|AI314065|AI464126
chr1	154472059	154472713	MACS_peak_9992	3064.47	654	NM_009782	Cacna1e	3064.47	25.03	5.75	12290	A430040I15|BII|Cach6|Cacnl1a6|Cav2.3|Cchra1|alpha1E
chr4	43663797	43664448	MACS_peak_129017	3064.34	651	uc008squ.1	Fam221b	3064.34	14.71	5.83	242408	4930412F15Rik
chr9	75445234	75445993	MACS_peak_193126	3055.4	759	NM_001039522	Leo1	3055.4	14.2	5.85	235497	Gm185
chr3	16183182	16183520	MACS_peak_116914	3047.7	338	NM_172677	Ythdf3	3047.7	24.9	5.79	229096	9130022A11Rik
chr11	106036871	106037261	MACS_peak_31271	3041.59	390	NM_027946	Dcaf7	3041.59	15.87	11.3	71833	1700012F10Rik|2610037L01Rik|C86529|HAN11|Wdr68
chrX	95940298	95940948	MACS_peak_204916	3041	650	NM_152822	Las1l	3041	14.25	5.76	76130	1810030A06Rik|5830482G23Rik
chr18	36748550	36749284	MACS_peak_81614	3004.41	734	uc012bbs.1	Ik	3004.41	10	11.21	24010	MuRED
chr2	151542817	151543228	MACS_peak_112438	2991.77	411	uc008ndx.1	Fkbp1a	2991.77	14.23	5.65	14225	FKBP12|Fkbp|Fkbp1
chr4	48051245	48052201	MACS_peak_129538	2989.7	956	uc008suu.1	Nr4a3	2989.7	23.22	5.64	18124	AI573420|CHN|CSMF|MINOR|NOR-1|Nor1|TEC
chr13	9276524	9277066	MACS_peak_45999	2986.43	542	NM_001081426	Dip2c	2986.43	20.68	5.73	208440	2900024P20Rik|9630044M06|mKIAA0934
chr7	90442728	90444377	MACS_peak_172974	2964.23	1649	ENSMUST00000061767	Crebzf	2964.23	9.56	5.59	233490	1110034C16Rik|6330417B10Rik|LAZip|LAZipII|SMILE|Zf
chr4	136602231	136602723	MACS_peak_137365	2962.26	492	NM_133872	Kdm1a	2962.26	10.59	5.58	99982	1810043O07Rik|AA408884|Aof2|D4Ertd478e|Kdm1|Lsd1|mKIAA0601
chr8	123373710	123374064	MACS_peak_185227	2957.56	354	NM_025804	Tcf25	2957.56	14.89	5.69	66855	1100001J13Rik|1810041K11Rik|D8Ertd325e|Nulp1|mKIAA1049
chr3	67463585	67463926	MACS_peak_120013	2957.23	341	ENSMUST00000058981	Lxn	2957.23	13.89	5.57	17035	-
chr7	127972553	127972969	MACS_peak_177077	2936.01	416	uc009jxn.1	Fus	2936.01	7.45	5.53	233908	D430004D17Rik|D930039C12Rik|Fus1|Tls
chr3	60877165	60878839	MACS_peak_117676	2928.29	1674	ENSMUST00000099086	Gm8325	2928.29	22.73	5.76	666853	EG666853
chr7	142575531	142578146	MACS_peak_178433	2923.53	2615	uc012fxn.1	H19	2923.53	12.47	5.52	14955	AI747191
chr11	102305181	102306766	MACS_peak_30802	2920.57	1585	NM_011551	Ubtf	2920.57	19.03	11.03	21429	A930005G04Rik|NOR-90|Tcfubf|UBF|UBF-1|UBF1
chr7	44812255	44813520	MACS_peak_169146	2916.96	1265	NM_030693	Atf5	2916.96	12.82	5.51	107503	AFTA|Atf7|Atfx|ODA-10
chr6	11933252	11934019	MACS_peak_152131	2914.83	767	NM_029404	Phf14	2914.83	13.87	5.74	75725	1110001C23Rik|4932409F11Rik|5730446A07Rik|AA623952|AV297001|mKIAA0783
chr5	105914667	105915224	MACS_peak_133766	2911.45	557	NM_018759	Zfp326	2911.45	17.23	10.97	54367	5730470H14Rik|ZAN75|Znf326
chr2	84650320	84650745	MACS_peak_105412	2906.21	425	ENSMUST00000111675	Ctnnd1	2906.21	15.14	5.71	12388	AA409437|AU019353|Catns|Ctnnd|P120|mKIAA0384
chr9	107614137	107615098	MACS_peak_200030	2889.39	961	NM_008138	Gnai2	2889.39	8.36	5.45	14678	C76432|Galphai2|Gia|Gnai-2
chr3	94582244	94582716	MACS_peak_121900	2881.08	472	NM_029721	Snx27	2881.08	22.58	5.43	76742	5730552M22Rik|ESTM45|ESTM47|R75405
chr6	113168086	113171958	MACS_peak_159664	2866.39	3872	NM_177763	Lhfpl4	2866.39	21.39	5.65	269788	1190004M23Rik|AI604880|B230384L07|mKIAA4027
chr11	59662494	59662948	MACS_peak_28550	2841.32	454	NM_012027	Mprip	2841.32	17.22	5.32	26936	9530046C02|AA536749|AI647711|C76423|RIP3|Rhoip3|mKIAA0864|p116Rip
chr10	43174698	43175621	MACS_peak_16803	2837.19	923	uc011xdj.2	9030612E09Rik	2837.19	15.54	5.31	74530	-
chr15	83153493	83154722	MACS_peak_62303	2824.53	1229	ENSMUST00000018186	Cyb5r3	2824.53	9.15	10.92	109754	0610016L08Rik|2500002N19Rik|C85115|Dia-1|Dia1|WU:AL591952.1-001|WU:AL591952.1-002|WU:AL591952.1-003|WU:Cyb5r3
chr13	55473427	55474293	MACS_peak_45504	2824.19	866	NM_019813	Dbn1	2824.19	17.78	10.9	56320	-
chr7	130728522	130729828	MACS_peak_177332	2818	1306	NM_021314	Tacc2	2818	12.98	5.29	57752	mKIAA4180
chr5	88554482	88556041	MACS_peak_146760	2816.9	1559	NM_023054	Utp3	2816.9	14.12	5.28	65961	2400011K09Rik|AW557551|C87704|Crl1|Crlz1|Sas10
chr17	47610906	47611492	MACS_peak_83878	2816.47	586	NM_016859	Bysl	2816.47	26.65	5.27	53414	Bys|Enp1
chr4	116075268	116075607	MACS_peak_131795	2815.14	339	ENSMUST00000030471	Lrrc41	2815.14	29.36	5.55	230654	AA409966|AW555107|D630045E04Rik|D730026A16Rik|MUF1
chr4	141471369	141479389	MACS_peak_138269	2813.35	8020	NM_019763	Spen	2813.35	16.75	5.26	56381	Mint|mKIAA0929
chr5	137684358	137684753	MACS_peak_150040	2800.31	395	NM_178162	Agfg2	2800.31	55.84	5.63	231801	A630095P14Rik|Hrbl|RAB-R|RABR
chr6	136820320	136821376	MACS_peak_161942	2796.43	1056	uc009emg.2	Wbp11	2796.43	24.65	5.62	60321	2510026P17Rik|D6Wsu113e|Npwbp|SIPP1
chr8	70529390	70530209	MACS_peak_180183	2782.93	819	uc009mar.2	Fkbp8	2782.93	22.04	5.57	14232	38kDa|FKBP-38|FKBP-8|Fkbp38
chr8	70868226	70868645	MACS_peak_180240	2775.5	419	NM_026964	Ccdc124	2775.5	17.1	5.56	234388	1810023B24Rik
chr7	28962018	28962340	MACS_peak_168022	2765.27	322	ENSMUST00000068045	Actn4	2765.27	21.46	5.16	60595	C77391
chr13	54379511	54383917	MACS_peak_49153	2764.45	4406	NM_009946	Cplx2	2764.45	16.74	5.53	12890	921-L|AI413745|AW492120
chr5	140620577	140623531	MACS_peak_138614	2761.3	2954	NM_175274	Ttyh3	2761.3	7.04	10.71	78339	2900029G13Rik|AI414930|TTY3|mTTY3
chr17	75538112	75539114	MACS_peak_85964	2760.69	1002	uc008dor.1	Fam98a	2760.69	23.74	5.13	72722	2810405J04Rik|AL024114
chr7	89338447	89338787	MACS_peak_172881	2747.22	340	NM_028343	Tmem135	2747.22	45.17	5.11	72759	2810439K08Rik|AW319712|PMP52
chr5	108518646	108520326	MACS_peak_148438	2743.63	1680	NM_007756	Cplx1	2743.63	23.19	5.1	12889	921-S
chr11	106247491	106248802	MACS_peak_34057	2731.49	1311	NM_028074	Ddx42	2731.49	17.56	5.48	72047	1810047H21Rik|AW319508|AW556242|B430002H05Rik|RHELP|RNAHP|SF3b125
chr6	83402666	83404824	MACS_peak_160216	2728.21	2158	NM_183138	Tet3	2728.21	6.96	5.33	194388	B430006D22Rik|BC037432|D230004J03Rik
chr6	118404579	118405340	MACS_peak_160325	2716.08	761	NM_194339	Bms1	2716.08	21.56	5.44	213895	AA408648|AU020092|AU043373|BB007109|BC030906|Bms1l|mKIAA0187
chr13	23751087	23751593	MACS_peak_43211	2715.79	506	uc007put.1	Hist1h2ab	2715.79	7.16	10.83	319172	H2A.1|H2a-53
chr11	78245547	78245987	MACS_peak_30957	2706.44	440	ENSMUST00000002121	Supt6	2706.44	27.56	5.29	20926	5131400N11Rik|AI132449|SPT6|Supt6h|mKIAA0162
chr13	103752393	103752702	MACS_peak_52261	2699.45	309	NM_172592	Srek1	2699.45	13.08	5.55	218543	8430401B01|AI450757|AI462342|SRrp508|SRrp86|Sfrs12|Srsf12
chr4	8751323	8753399	MACS_peak_126924	2693.36	2076	uc008rxy.1	Chd7	2693.36	8.59	5.28	320790	A730019I05Rik|Cycn|Cyn|Dz|Edy|Flo|GENA 47|GENA 60|Gena 52|Lda|Mt|Obt|Todo|WBE1|Whi|metis
chr11	98682553	98682937	MACS_peak_33388	2683.78	384	NM_009439	Psmd3	2683.78	16.54	5.4	22123	AI255837|AntP91a|D11Bwg1349e|Psd3|Tstap91a
chr11	116078573	116079596	MACS_peak_35790	2673.49	1023	NM_016852	Wbp2	2673.49	13.51	5.37	22378	-
chr6	112946429	112947266	MACS_peak_162716	2668.34	837	NM_080448	Srgap3	2668.34	8.39	5.35	259302	AI452337|Arhgap14|D130026O08Rik|Gbi|MEGAP|WRP|mKIAA0411
chr16	97490428	97491103	MACS_peak_77961	2662.73	675	ENSMUST00000177820	Gm9242	2662.73	79.91	5.6	668559	EG668559
chr11	69404005	69406173	MACS_peak_29716	2660.75	2168	NM_001017426	Kdm6b	2660.75	13.39	5.34	216850	1700064E03Rik|BC038313|Jmjd3|mKIAA0346
chr9	44505583	44507870	MACS_peak_193758	2657.93	2287	NM_030256	Bcl9l	2657.93	16.07	5.33	80288	B9L|BC003321|BCL9-2|DLNB11
chr8	20550303	20550748	MACS_peak_176973	2651.7	445	uc029wre.1	5330429B09Rik	2651.7	26.17	5.58	NA	NA
chr7	126883905	126884914	MACS_peak_173266	2637.61	1009	NM_001163774	Taok2	2637.61	20.46	5.54	381921	1110033K02Rik|B230344N16|MAP3K17|PSK|PSK1|TAO1|TAO2|mKIAA0881
chr10	14523061	14523571	MACS_peak_14902	2634.23	510	ENSMUST00000096020	Gm10335	2634.23	9.66	5.53	100039571	ENSMUSG00000071532
chr9	114705053	114705369	MACS_peak_200928	2626.02	316	uc009rxx.1	Dync1li1	2626.02	13	5.3	235661	1110053F02Rik|Dnclic1|LIC-1
chr7	12774112	12775658	MACS_peak_163413	2624.54	1546	NM_001017955	Zscan18	2624.54	20.64	5.49	232875	EG232875
chr5	135934322	135934641	MACS_peak_152710	2618.09	319	NM_018871	Ywhag	2618.09	9.83	5.42	22628	14-3-3gamma|D7Bwg1348e
chr8	121907065	121907694	MACS_peak_188916	2615.6	629	ENSMUST00000045557	Slc7a5	2615.6	20.54	5.4	20539	4F2LC|D0H16S474E|LAT1|TA1
chr11	100956732	100959325	MACS_peak_33666	2615.2	2593	ENSMUST00000060792	Ptrf	2615.2	17.81	5.39	19285	2310075E07Rik|AW546441|Cav-p60|Cavin
chr11	70725887	70726502	MACS_peak_29690	2612.38	615	NM_153103	Kif1c	2612.38	15.28	5.46	16562	B430105J22Rik|D11Bwg1349e|Ltxs1|Orch3
chr11	95414097	95414404	MACS_peak_32632	2611.6	307	ENSMUST00000107722	Spop	2611.6	38.14	5.45	20747	AI315626|Pcif1|TEF2
chr10	40349307	40349721	MACS_peak_16448	2588.08	414	NM_198164	Cdk19	2588.08	30.28	5.41	78334	2700084L06Rik|AI845279|AW228747|CDK11|Cdc2l6|mKIAA1028
chr14	68086486	68086806	MACS_peak_58699	2576.91	320	NM_010910	Nefl	2576.91	19.7	5.4	18039	AI847934|CMT2E|NF-L|NF68|Nfl
chr7	45046838	45050128	MACS_peak_169221	2570.9	3290	NM_175022	Prr12	2570.9	9.21	5.31	233210	6720469B10|BC058674
chr11	104327971	104332090	MACS_peak_34203	2552.61	4119	ENSMUST00000106992	Mapt	2552.61	15.44	5.42	17762	AI413597|AW045860|Mtapt|Tau
chr16	20531079	20532187	MACS_peak_73453	2547.81	1108	NM_007889	Dvl3	2547.81	9.85	5.41	13544	-
chr6	88849194	88849988	MACS_peak_161017	2546.49	794	NM_176973	Podxl2	2546.49	10.41	5.41	319655	D130074J02Rik|PODLX2
chr17	32201001	32201592	MACS_peak_82549	2533.39	591	NM_020508	Brd4	2533.39	14.49	5.38	57261	Brd5|HUNK1|MCAP|WI-11513
chrX	7922047	7922514	MACS_peak_202172	2530.95	467	NM_013892	Pcsk1n	2530.95	9.48	5.36	30052	AI848336|KEP|PEN|PEN19|PEN20|Pan3|SAAS|SAASCT|bLEN|lLEN|proSAAS
chr17	35135717	35136235	MACS_peak_82983	2527.11	518	ENSMUST00000174478	Bag6	2527.11	16.92	5.35	224727	2410045D21Rik|AA408914|BAG-6|Bat3|D17H6S52E|G3|Scythe
chrX	53669184	53670408	MACS_peak_203541	2527.11	1224	NM_001018063	Cxx1b	2527.11	12.7	5.36	553127	Mart8c
chr7	13258980	13261269	MACS_peak_163455	2520.31	2289	uc009ffk.1	6330408A02Rik	2520.31	19.26	5.4	321008	-
chr9	73011929	73013080	MACS_peak_197480	2517.86	1151	NM_001114328	Ccpg1	2517.86	14.34	5.34	72278	1700030B06Rik|1810073J13Rik|9430028F23Rik|AI426686|AI875170|CPR8|D9Ertd392e
chr15	87544298	87544603	MACS_peak_62881	2517.26	305	NM_001252310	Fam19a5	2517.26	48.13	10.82	106014	TAFA5|Tafa-5|Tara-5
chr5	30711563	30712002	MACS_peak_140025	2516.7	439	uc008wvw.1	Dpysl5	2516.7	24.17	5.39	65254	CRAM|CRMP-5|Crmp5
chr3	54807198	54807791	MACS_peak_119228	2503.87	593	NM_133231	Rfxap	2503.87	16.14	5.31	170767	5730495K23Rik
chr2	121299268	121307372	MACS_peak_109797	2474.64	8104	NM_032393	Map1a	2474.64	18.51	5.24	17754	6330416M19Rik|AI853608|Mtap-1|Mtap1|Mtap1a|moth1
chr4	17853090	17853487	MACS_peak_125071	2451.37	397	ENSMUST00000142434	Mmp16	2451.37	14.8	5.37	17389	MT-MMP 3|MT3-MMP|Mt3mmp
chr11	29692897	29693693	MACS_peak_25908	2445.5	796	NM_194052	Rtn4	2445.5	15.49	5.16	68585	1110020G17Rik|AA407876|AA409940|AA960376|ASY|C130026I10Rik|NOGO|NSP-CL|NgA|Nogo-A|Nogo-B|Nogo-C|mKIAA0886|mKIAA4153
chr11	106201829	106202178	MACS_peak_34450	2431.61	349	uc007lyj.1	Ccdc47	2431.61	16.68	5.14	67163	2610204L23Rik|C88307|asp4|calumin
chrX	153498231	153500470	MACS_peak_206937	2423.93	2239	NM_018798	Ubqln2	2423.93	9.02	5.12	54609	Chap1|Dsk2|HRIHFB2157|Plic-2|Plic2
chr14	12822303	12823079	MACS_peak_54075	2402.77	776	NM_012061	Cadps	2402.77	19.87	5.72	27062	AU067781|CAPS|CAPS1|mKIAA1121
chr8	70527644	70527956	MACS_peak_180182	2401.2	312	ENSMUST00000117580	Kxd1	2401.2	18.9	5.72	75620	0610030B01Rik|2810422J05Rik|C78305
chr11	98756922	98757235	MACS_peak_33100	2398.64	313	uc007lhd.1	Thra	2398.64	17.78	5.71	21833	6430529J03Rik|AW259572|Erba|Nr1a1|Rvr|T3R[a]|T3Ralpha|Thra1|Thra2|c-erbA-1|c-erbA-alpha|c-erbAalpha
chr12	91567539	91567860	MACS_peak_43232	2395.8	321	NM_031391	Gtf2a1	2395.8	19.47	5.7	83602	6330549H03Rik|AA536742|AA959775|AW060250|TfIIAa/b|Tfiia1
chr11	101425084	101425610	MACS_peak_33420	2392.9	526	NM_172566	Rundc1	2392.9	32.59	5.7	217201	AW125546|D930024B17
chrX	10717983	10719702	MACS_peak_197890	2360.34	1719	NM_001166635	Mid1ip1	2360.34	8.34	5.76	68041	3110038L01Rik|Mig12|S14R
chr2	180659222	180662583	MACS_peak_114242	2329.76	3361	NM_175551	Dido1	2329.76	17.79	5.67	23856	6720461J16Rik|D130048F08Rik|DATF-1|DIO-1|Datf1|dido
chr3	34650004	34652145	MACS_peak_106983	2328.31	2141	NM_011443	Sox2	2328.31	6.29	10.57	20674	Sox-2|lcc|ysb
chr19	16132830	16133461	MACS_peak_95940	2310.16	631	NM_008139	Gnaq	2310.16	13.16	4.9	14682	1110005L02Rik|6230401I02Rik|AA408290|AW060788|Dsk1|Dsk10|Galphaq|Gq|GqI
chr4	76449642	76449980	MACS_peak_131165	2306.65	338	ENSMUST00000107289	Ptprd	2306.65	26.3	4.9	19266	1110002J03Rik|3000002J10Rik|B230219D21Rik|R-PTP-delta
chr17	56575354	56576012	MACS_peak_84501	2300.27	658	NM_001029979	Safb2	2300.27	17.42	4.88	224902	AA389433|AI255170|mKIAA0138
chr7	67758818	67759742	MACS_peak_171392	2294.97	924	NM_183312	Synm	2294.97	34.95	4.86	233335	4930412K21Rik|AI852401|Dmn|E130104F11|Syn|Synemin
chr2	13574090	13574994	MACS_peak_91516	2293.53	904	ENSMUST00000028062	Vim	2293.53	4.16	10.46	22352	-
chr10	43173975	43174530	MACS_peak_16877	2286.26	555	NM_175407	Sobp	2286.26	10	5.78	109205	2900009C16Rik|5330439J01Rik|JXC1|jc
chrX	37095521	37095822	MACS_peak_198461	2277.53	301	NM_026573	Upf3b	2277.53	20.98	5.76	68134	5730594O13Rik|AI317193|AW541158|RENT3B|UPF3X
chr10	127285531	127286572	MACS_peak_23852	2271.93	1041	NM_033072	Mbd6	2271.93	19.23	4.83	110962	D10Wsu93e
chr4	33247947	33248787	MACS_peak_128113	2263.87	840	NM_001033225	Pnrc1	2263.87	11.76	4.81	108767	5730463C12Rik|B4-2|PRR2|Prol2
chr7	126272618	126273099	MACS_peak_176766	2262.09	481	NM_145587	Sbk1	2262.09	12.9	4.81	104175	Sbk
chr7	30584993	30587029	MACS_peak_168336	2260.87	2036	NM_029274	Kmt2b	2260.87	16.66	4.8	75410	2610014H22Rik|Mll2|Wbp7|mKIAA0304
chr5	115157802	115158179	MACS_peak_149519	2239.32	377	ENSMUST00000112121	Mlec	2239.32	9.06	4.76	109154	2410014A08Rik|AI850530|ESTM19|X83352|mKIAA0152
chr15	38518908	38519266	MACS_peak_65096	2237.64	358	NM_018745	Azin1	2237.64	20.7	4.75	54375	1700085L02Rik|AZI|Oazi|Oazin
chr10	127262767	127263302	MACS_peak_23849	2237.53	535	NM_008447	Kif5a	2237.53	16.53	4.75	16572	D10Bwg0738e|Khc|Kif5|Kns|mKIAA4086
chr8	72460853	72461355	MACS_peak_166661	2236.99	502	NM_138585	Cherp	2236.99	12.69	10.36	27967	5730408I11Rik|D8Wsu96e|DAN16|Scaf6
chr2	85061887	85064016	MACS_peak_107167	2234.72	2129	NM_001081260	Tnks1bp1	2234.72	9.48	4.74	228140	Tab182|mKIAA1741
chr8	11004469	11008458	MACS_peak_179347	2224.69	3989	ENSMUST00000040514	Irs2	2224.69	15.41	4.72	384783	Irs-2
chr7	126950534	126951116	MACS_peak_176879	2219.98	582	NM_144926	Sez6l2	2219.98	22.05	4.7	233878	AI835913|AW121566|BSRP-A|Psk1
chr1	152765906	152766351	MACS_peak_9784	2218.98	445	ENSMUST00000111857	Rgl1	2218.98	19.4	5.8	19731	Rgl|mKIAA0959
chr18	37806409	37808977	MACS_peak_90241	2203.32	2568	NM_033581	Pcdhgc3	2203.32	10.06	4.76	93706	PC43|Pcdh2
chr11	87979524	87981570	MACS_peak_32000	2202.25	2046	NM_026556	Dynll2	2202.25	12.09	5.75	68097	1700064A15Rik|6720463E02Rik|C87222|DLC8|DLC8b|Dlc2
chr19	31082938	31085106	MACS_peak_97140	2187.51	2168	NM_031249	Cstf2t	2187.51	12.09	4.71	83410	64kDa|C77975|tCstF-64|tauCstF-64
chr11	48815842	48817391	MACS_peak_27357	2170.8	1549	NM_145377	Trim41	2170.8	22.75	4.81	211007	AW552703|BC020156|R75223|RINCK
chr7	132057461	132057813	MACS_peak_173823	2153.98	352	uc009kbv.2	Cpxm2	2153.98	79.66	5.76	55987	4632435C11Rik|CPX-2|Cpx2
chr5	23524147	23524615	MACS_peak_139081	2153.08	468	NM_009274	Srpk2	2153.08	13.93	5.75	20817	AW226533|AW492537|AW547358|Wbp6|mSRPK2
chr8	71480435	71481242	MACS_peak_180327	2152.06	807	NM_001164679	Ano8	2152.06	23.64	5.74	382014	BC053460|Tmem16h
chr11	72767512	72767910	MACS_peak_29881	2139.06	398	NM_009671	Ankfy1	2139.06	12.43	5.72	11736	Ankhzn|ZFYVE14|mKIAA1255
chr11	87358448	87359023	MACS_peak_31948	2135.76	575	ENSMUST00000055438	Ppm1e	2135.76	27.66	5.71	320472	AW049266|B930008A12Rik|POPX1|PP2CH|mKIAA1072
chrX	136213999	136214583	MACS_peak_206096	2124.08	584	NM_009052	Bex1	2124.08	7.52	4.72	19716	AA407839|AU018692|Bex4|Rex3
chr2	155405474	155408450	MACS_peak_112977	2122.77	2976	NM_019825	Ncoa6	2122.77	15.8	4.71	56406	AIB3|ASC-2|ASC2|NRC|Ncoa7|PRIP|RAP250|mKIAA0181
chr10	29146563	29147753	MACS_peak_15736	2117.31	1190	NM_026138	Soga3	2117.31	8.2	5.66	67412	6330407J23Rik
chr19	23892734	23894020	MACS_peak_96468	2114.29	1286	NM_177034	Apba1	2114.29	8.89	4.7	319924	6430513E09Rik|Lin-10|Mint|Mint1|Urop11|X11|X11alpha
chr5	14668964	14669675	MACS_peak_140948	2112.28	711	NM_011995	Pclo	2112.28	8.25	4.69	26875	Acz|Pico
chr5	115327176	115327499	MACS_peak_149558	2110.23	323	NM_025573	Srsf9	2110.23	37.05	4.68	108014	25kDa|2610029M16Rik|SRp30c|Sfrs9
chr13	104228610	104229002	MACS_peak_52353	2106.29	392	NM_181061	Cenpk	2106.29	40.36	5.64	60411	B130045K24Rik|BB232189|C530004N04Rik|Cenp-K|Solt|Solzt
chr18	75432453	75434038	MACS_peak_91872	2104.73	1585	NM_201354	Ctif	2104.73	25.8	5.63	269037	Gm672
chr9	49506852	49507653	MACS_peak_194491	2103.55	801	NM_001113204	Ncam1	2103.55	6.36	4.78	17967	CD56|E-NCAM|NCAM-1|Ncam
chrY	90785441	90785979	MACS_peak_203326	2098.38	538	NM_133362	Erdr1	2098.38	14.15	5.6	170942	edr
chrX	20860510	20861609	MACS_peak_202708	2093.93	1099	NM_013680	Syn1	2093.93	8.04	4.76	20964	Syn-1|Syn1-S
chr8	84565947	84566393	MACS_peak_181503	2092.34	446	NM_007578	Cacna1a	2092.34	14.85	5.57	12286	APCA|BI|Caca1a|Cacnl1a4|Cav2.1|Ccha1a|EA2|FHM|HPCA|MHP|MHP1|SCA6|alpha1A|la|nmf352|rkr|smrl|tg
chr7	127803899	127807389	MACS_peak_177034	2088.12	3490	ENSMUST00000106267	Stx1b	2088.12	16.91	4.76	56216	Stx1b2|Stx1bl|Syn1b
chr4	43424742	43426128	MACS_peak_116523	2085	1386	uc033ibq.1	Rusc2	2085	20.02	10.12	100213	AI840675|mKIAA0375
chr11	109650282	109650624	MACS_peak_35109	2080.8	342	uc007mct.2	Prkar1a	2080.8	12.96	4.74	19084	1300018C22Rik|RIalpha|Tse-1|Tse1
chr18	34846400	34847463	MACS_peak_89710	2073.81	1063	NM_144865	Reep2	2073.81	15.66	4.73	225362	-
chr15	98651464	98652538	MACS_peak_69327	2068.24	1074	uc007xnf.2	Ddx23	2068.24	14.21	5.5	74351	3110082M05Rik|4921506D17Rik
chr3	129830594	129830932	MACS_peak_124608	2061.58	338	ENSMUST00000149071	Gar1	2061.58	18.96	4.71	68147	AA409823|AI326794|C430047J18Rik|Nola1
chr14	56668247	56668564	MACS_peak_53118	2057.44	317	NM_023773	Mphosph8	2057.44	25.22	10.13	75339	1500035L22Rik|4930548G07Rik|AU040635
chr4	43442223	43443638	MACS_peak_128982	2053.65	1415	ENSMUST00000060864	Tesk1	2053.65	18.66	4.78	21754	AI326901
chr19	45006557	45008375	MACS_peak_98411	2044.07	1818	NM_153796	Peo1	2044.07	27.39	4.77	226153	D19Ertd626e|PEO|Twinl
chr7	45466219	45466775	MACS_peak_169317	2040.6	556	uc009gvh.1	Bax	2040.6	16.01	4.86	12028	-
chr8	64692642	64693040	MACS_peak_179581	2008.7	398	NM_013494	Cpe	2008.7	8.65	5.82	12876	CPH|Cph-1|Cph1|R74677|fat
chr2	180589306	180589621	MACS_peak_114228	2003.27	315	ENSMUST00000029087	Ogfr	2003.27	36.6	5.8	72075	2010013E17Rik
chr7	127511777	127512869	MACS_peak_176960	1998.76	1092	uc009jvt.2	1700008J07Rik	1998.76	30.01	4.86	629159	AW048743
chr12	100944846	100945908	MACS_peak_43866	1998.39	1062	NM_026681	Ccdc88c	1998.39	9.56	5.88	68339	0610010D24Rik|AV000935|AW324073|Daple|mKIAA1509
chr10	115315193	115315591	MACS_peak_22688	1990.35	398	NM_024454	Rab21	1990.35	17.82	4.84	216344	9630024B22
chr17	27623086	27623465	MACS_peak_81741	1987.1	379	ENSMUST00000025050	Nudt3	1987.1	16.39	4.83	56409	1110011B09Rik|AA960325|Dipp|Dipp1
chr3	18054324	18056908	MACS_peak_116954	1979.89	2584	NM_021560	Bhlhe22	1979.89	13.66	4.8	59058	Beta3|Bhlhb5
chr17	47010141	47010532	MACS_peak_75932	1978.21	391	NM_146078	Ubr2	1978.21	11.72	10.01	224826	9930021A08Rik|AI462103|AW540746|E130209G04Rik|ENSMUSG00000043296|mKIAA0349
chr8	110738289	110741400	MACS_peak_187538	1970.68	3111	NM_198625	Mtss1l	1970.68	7.32	4.8	244654	ABBA
chr3	87914901	87916132	MACS_peak_119104	1970.48	1231	NM_008231	Hdgf	1970.48	10.35	5.84	15191	AI118077|D3Ertd299e
chr4	138456717	138457539	MACS_peak_137773	1959.55	822	NM_025451	Camk2n1	1959.55	17.89	4.77	66259	1810006K23Rik|AI848599|AI891706
chr15	78966293	78968842	MACS_peak_67825	1958.22	2549	NM_001039155	Triobp	1958.22	15.82	4.76	110253	AI428493|EST478828|Tara|mKIAA1662
chr9	65794621	65795495	MACS_peak_196434	1956.35	874	NM_172536	Zfp609	1956.35	9.37	4.76	214812	9830165N24|BC016271|Znf609|mKIAA0295
chrX	136201114	136201813	MACS_peak_206093	1947.75	699	NM_177919	Tceal5	1947.75	13.01	4.73	331532	6430401A05Rik
chr16	32644642	32645108	MACS_peak_74430	1944.89	466	NM_016788	Tnk2	1944.89	15.01	4.72	51789	Ack|Ack-1|Ack1|Cdgip|Pyk1
chr3	103279657	103280446	MACS_peak_120582	1936.97	789	NM_053170	Trim33	1936.97	32.36	5.77	94093	8030451N04Rik|AI413936|Ecto|Tif1g
chr18	47247091	47249584	MACS_peak_91143	1936.06	2493	NM_018744	Sema6a	1936.06	8.78	4.69	20358	A730020P05Rik|AI851735|Sema6A-1|Semaq|VIa
chr9	21635535	21635940	MACS_peak_191300	1933.46	405	NM_011417	Smarca4	1933.46	9.04	4.68	20586	Brg1|HP1-BP72|SNF2beta|SW1/SNF|b2b508.1Clo|b2b692Clo
chrX	159414571	159414892	MACS_peak_207089	1923.93	321	ENSMUST00000112471	Map7d2	1923.93	33.63	4.65	78283	1600028E09Rik|2900002G04Rik|5330432J06Rik|C030036K04Rik|Mtap7d2
chr15	102460369	102460719	MACS_peak_71069	1923.52	350	NM_025385	Prr13	1923.52	33.19	4.65	66151	1110020C13Rik|2010324E22Rik
chr5	142903114	142903941	MACS_peak_153751	1922.61	827	ENSMUST00000100497	Actb	1922.61	7.33	4.64	11461	Actx|E430023M04Rik|beta-actin
chr11	77777234	77778926	MACS_peak_30805	1922.45	1692	uc007khf.1	Myo18a	1922.45	10.13	4.64	360013	MAJN|MyoPDZ|MysPDZ
chr8	70895018	70895507	MACS_peak_180243	1915.01	489	NM_029751	Rpl18a	1915.01	8	5.78	76808	2510019J09Rik
chr4	132006957	132007438	MACS_peak_134019	1909.59	481	NM_183428	Epb4.1	1909.59	9.8	5.77	NA	NA
chr2	152393961	152398063	MACS_peak_112546	1909.06	4102	ENSMUST00000182625	Sox12	1909.06	18.78	4.6	20667	2010205A02Rik
chr10	60131335	60135198	MACS_peak_17912	1908.86	3863	ENSMUST00000121820	Spock2	1908.86	16.63	5.76	94214	AA407235|Gcap26|mKIAA0275
chr5	125047801	125048534	MACS_peak_151236	1905.84	733	uc008zrc.1	Ncor2	1905.84	15.44	4.59	20602	N-CoR|SMRT|SMRTe
chr17	84958000	84958394	MACS_peak_86687	1902.92	394	NM_011151	Ppm1b	1902.92	21	4.58	19043	PP2CB
chr10	128883213	128885465	MACS_peak_22203	1899.91	2252	ENSMUST00000026408	Gdf11	1899.91	14.95	9.69	14561	BMP-11|Bmp11
chr8	107367048	107369551	MACS_peak_187257	1894.26	2503	NM_018823	Nfat5	1894.26	13.01	4.57	54446	AI225870|B130038B15Rik|CAG-8|CAG80|NFATL1|OREBP|TonEBP|mKIAA0827|nfatz
chr3	107696157	107696560	MACS_peak_123355	1893.7	403	ENSMUST00000029490	Ahcyl1	1893.7	14.27	4.56	229709	1110034F20Rik|AA409031|AA414901|Ahcy-rs3|DCAL|Irbit
chr17	35850294	35851005	MACS_peak_81791	1887.35	711	NM_001010833	Mdc1	1887.35	16.64	5.73	240087	6820401C03|AA413496|Nfbd1|mKIAA0170
chrX	53642487	53643763	MACS_peak_203539	1884.77	1276	ENSMUST00000088779	Cxx1a	1884.77	9.8	4.55	66158	1110012O05Rik|Mar8.2A/B|Mart8b
chr13	97241104	97241529	MACS_peak_52728	1878.75	425	NM_007930	Enc1	1878.75	11.66	4.63	13803	Nrpb|PIG10
chr6	38433924	38434598	MACS_peak_154368	1870.74	674	NM_177185	Ubn2	1870.74	19.1	5.69	320538	2900060J04Rik|6030408G03Rik|BC060116|D130059P03Rik|mKIAA2030
chr10	42502030	42502492	MACS_peak_16632	1866.17	462	ENSMUST00000019939	Snx3	1866.17	11.49	4.71	54198	SDP3
chr15	25984365	25985183	MACS_peak_63874	1859.22	818	NM_144523	Zfp622	1859.22	17.19	4.7	52521	1110033B05Rik|D15Ertd806e|ZPR9|Znf622
chr10	17947508	17948067	MACS_peak_14952	1855.17	559	NM_001033432	Heca	1855.17	23.24	4.69	380629	Gm869|HDC|HDCL
chr2	78869046	78869405	MACS_peak_106874	1852.6	359	NM_009454	Ube2e3	1852.6	14.45	4.69	22193	Ubce4|ubcM2
chr18	15061767	15063582	MACS_peak_87014	1851.53	1815	NM_001142731	Kctd1	1851.53	33.86	5.63	106931	4933402K10Rik|AI661543|AW553000
chr4	129514716	129515985	MACS_peak_122967	1849.12	1269	ENSMUST00000062356	Marcksl1	1849.12	4.64	9.57	17357	AL022768|AW215397|AW536807|D4Bc1|F52|MacMARCKS|Macs2|Macs3|Mlp|Mrp
chr17	25565952	25568081	MACS_peak_81339	1847.55	2129	NM_011447	Sox8	1847.55	13.86	4.67	20681	-
chr15	36608313	36608973	MACS_peak_64867	1845.4	660	NM_008774	Pabpc1	1845.4	6.19	4.67	18458	PABP|Pabp1|PabpI|Pabpl1|ePAB
chr1	74855028	74857466	MACS_peak_4981	1844.65	2438	NM_009872	Cdk5r2	1844.65	13.29	4.66	12570	B230310J22Rik|p39
chr3	62338677	62340573	MACS_peak_108274	1842.81	1896	ENSMUST00000079300	Arhgef26	1842.81	14.98	9.55	622434	4631416L12Rik|8430436L14Rik|AI303572|AW491953|SGEF
chr9	37544491	37545331	MACS_peak_174509	1841.98	840	ENSMUST00000065668	Nrgn	1841.98	19.31	9.54	64011	0710001B06Rik|AI838505|NG|NG/RC3|Pss1|R75334|RC3
chr14	12153657	12154426	MACS_peak_53895	1830.33	769	NM_008981	Ptprg	1830.33	14.81	5.58	19270	5430405N12Rik|AW046354|AW549872|RPTPgamma
chrX	7651836	7653256	MACS_peak_202106	1823.1	1420	NM_009305	Syp	1823.1	8.47	4.71	20977	A230093K24Rik|AI848995|Syn|p38
chr13	14164108	14165506	MACS_peak_42732	1820.69	1398	uc007pmy.2	Arid4b	1820.69	18	9.42	94246	BCAA|BRCAA1|RBBP1L1|Rbp1l1|SAP180
chr6	125096568	125097265	MACS_peak_164277	1818.88	697	ENSMUST00000155261	Chd4	1818.88	18.55	4.7	107932	9530019N15Rik|AA617397|BC005710|D6Ertd380e|Mi-2beta|mKIAA4075
chr5	142771304	142772303	MACS_peak_153713	1818.8	999	NM_178242	Tnrc18	1818.8	8.2	4.79	231861	BC025631|EG381742|Zfp469
chr1	135363669	135364385	MACS_peak_9092	1808.55	716	NM_053106	Lmod1	1808.55	17.13	4.76	93689	9530015K06Rik|SM-Lmod
chr7	30522225	30523846	MACS_peak_168310	1804.01	1621	NM_178252	Arhgap33	1804.01	6.65	4.75	233071	AW324378|NOMA-GAP|Snx26|TCGAP
chr4	32982997	32983607	MACS_peak_128078	1800.84	610	NM_027491	Rragd	1800.84	22.16	4.74	52187	5730543C08Rik|AI467523|C030003H22Rik|D4Ertd174e
chr11	22972643	22974638	MACS_peak_25528	1797.55	1995	NM_011663	Zrsr1	1797.55	16.48	4.74	22183	D11Ncvs75|Irlgs2|SP2|U2af1-rs1|U2afbp-rs
chr9	25303522	25304049	MACS_peak_187501	1794.97	527	uc009opm.1	2022-09-07	1794.97	6.32	5.67	235072	Cdc10|E430034N22
chr10	128401467	128401923	MACS_peak_23996	1794.46	456	NM_027257	Nabp2	1794.46	11.75	5.67	69917	2610036N15Rik|Obfc2b|SSB1
chr10	79819040	79820896	MACS_peak_19725	1787.48	1856	NM_023128	Palm	1787.48	8.33	4.7	18483	-
chr12	116255649	116256251	MACS_peak_45328	1787.03	602	uc007phm.1	Wdr60	1787.03	14.66	5.72	217935	D430033N04Rik
chr11	83302951	83303426	MACS_peak_31379	1782.66	475	ENSMUST00000142680	Ap2b1	1782.66	35.09	5.7	71770	1300012O03Rik|AI788979
chr7	6707264	6711731	MACS_peak_163267	1779.12	4467	NM_008817	Peg3	1779.12	12.19	5.68	18616	AL022617|ASF-1|End4|Gcap4|Pw1|Zfp102|mKIAA0287
chr14	20347793	20348121	MACS_peak_50226	1775.66	328	NM_027475	Ecd	1775.66	17.35	9.12	70601	5730461K03Rik|Hsgt1
chr5	123720720	123721044	MACS_peak_136282	1774.25	324	NM_027494	Zcchc8	1774.25	38.18	9.11	70650	5730565F05Rik
chr1	174501824	174503591	MACS_peak_10940	1772.82	1767	NM_019445	Fmn2	1772.82	15.22	9.1	54418	AU024104
chr7	121922904	121923468	MACS_peak_172750	1769.66	564	NM_001033318	Cog7	1769.66	15.35	5.64	233824	5630400E24Rik|Gm167
chr2	169633012	169633779	MACS_peak_104277	1768.55	767	ENSMUST00000109159	Tshz2	1768.55	13.11	9.07	228911	2900073F20Rik|B830045G17|Mtsh2|Sdccag33l|Tsh2|Zfp218|mKIAA4248|teashirt2
chr19	30174990	30175441	MACS_peak_97108	1767.11	451	NM_138595	Gldc	1767.11	16.29	4.73	104174	D030049L12Rik|D19Wsu57e
chr2	29619719	29620063	MACS_peak_102591	1761.45	344	NM_054050	Rapgef1	1761.45	21.02	4.72	107746	4932418O06Rik|C3G|Grf2
chr11	86757247	86757565	MACS_peak_29282	1761.32	318	ENSMUST00000103186	Cltc	1761.32	10.67	9.04	67300	3110065L21Rik|CHC|R74732
chr9	110246064	110247390	MACS_peak_200479	1760.52	1326	uc009rtt.1	Cspg5	1760.52	7.19	4.71	29873	Caleb|Ngc
chr11	101738129	101738561	MACS_peak_33452	1760.26	432	NM_144831	Dhx8	1760.26	18.22	5.63	217207	Ddx8|mDEAH6|mKIAA4096
chr2	32633640	32635058	MACS_peak_103274	1759.37	1418	NM_021515	Ak1	1759.37	23.43	4.7	11636	Ak-1|B430205N08Rik
chr15	98803781	98807200	MACS_peak_70441	1757.41	3419	NM_001013741	Ddn	1757.41	8.77	4.69	13199	Gm748
chr2	80580857	80581380	MACS_peak_96964	1747.98	523	ENSMUST00000111760	Nckap1	1747.98	18.28	9.06	50884	C79304|H19|Hem-2|Hem2|Nap1|mKIAA0587|mh19|p125Nap1
chr14	60378285	60380893	MACS_peak_58908	1745.41	2608	NM_028113	Amer2	1745.41	16.43	4.66	72125	2600011E07Rik|Fam123a
chr11	102896665	102897200	MACS_peak_33987	1742.96	535	NM_010277	Gfap	1742.96	7.98	4.66	14580	AI836096
chr11	69837047	69837784	MACS_peak_29790	1738.56	737	uc007jrx.1	Nlgn2	1738.56	15.61	4.74	216856	NL2
chr2	165012835	165013162	MACS_peak_112525	1726.49	327	NM_144892	Ncoa5	1726.49	12.07	5.6	228869	CIA
chr4	120094375	120099450	MACS_peak_134868	1725.11	5075	NM_010657	Hivep3	1725.11	14.59	4.71	16656	2900056N03Rik|A130075N07|AI848000|E030045D18Rik|KBP-1|KBP1|Krc|Rc|Schnurri-3|Shn3|Zas3
chr17	13887981	13888977	MACS_peak_79409	1721.17	996	NM_010806	Mllt4	1721.17	10.68	5.58	17356	5033403D15Rik|AF6|Af-6|Afadin|Gm314|I-afadin|S-afadin
chr11	99209118	99210277	MACS_peak_30469	1720.68	1159	NM_020618	Smarce1	1720.68	18.77	9.09	57376	2810417B20Rik|5830412H02Rik|9030408N19Rik|Baf27
chr10	127078906	127080771	MACS_peak_23806	1718.68	1865	NM_001033263	Agap2	1718.68	9.41	4.69	216439	AGAP-2|Centg1|PIKE|cnt-g1|mKIAA0167
chr18	86394951	86395910	MACS_peak_92817	1709.9	959	NM_144946	Neto1	1709.9	19.82	5.54	246317	AI851453|Btcl1|C130005O10Rik
chr18	80971180	80974625	MACS_peak_94135	1709.58	3445	uc008ftl.2	Sall3	1709.58	8.39	4.68	20689	B130022O04Rik|Msal|Msal-1|Sal|Salt|Spalt
chr2	150786734	150787110	MACS_peak_112358	1708.9	376	ENSMUST00000045441	Pygb	1708.9	7.51	4.66	110078	-
chr3	108412184	108415552	MACS_peak_123464	1708.41	3368	ENSMUST00000090558	Celsr2	1708.41	7.82	4.65	53883	Adgrc2|EGFL2|Flamingo1|flamingo|mKIAA0279|mfmi1
chr10	40936109	40936738	MACS_peak_16449	1707.96	629	NM_031877	Wasf1	1707.96	7.99	4.65	83767	AI195380|AI838537|Scar|WAVE|WAVE-1
chr9	83110177	83111106	MACS_peak_198040	1703	929	uc009qwc.3	Hmgn3	1703	10.5	4.72	94353	1110002A15Rik|6330514M13Rik|BB071015|TRIP7
chr16	39984370	39984727	MACS_peak_75463	1702.04	357	uc007zfr.1	Lsamp	1702.04	28.06	4.71	268890	5430428I19|AW046674|B130007O04Rik|D930023J12Rik|Lam|Lamp
chr8	13794899	13795234	MACS_peak_162729	1701.74	335	uc009kym.1	Upf3a	1701.74	19.68	9.11	67031	2600001C03Rik|4930546M19Rik|RENT3A|UPF3
chr2	20848473	20850385	MACS_peak_101566	1694.13	1912	NM_001081364	Arhgap21	1694.13	10.01	4.79	71435	5530401C11Rik|AA416458|ARHGAP10
chr15	78935185	78935694	MACS_peak_67815	1690.14	509	ENSMUST00000145157	Nol12	1690.14	18.26	4.78	97961	C78541|Nop25
chr4	138216295	138216740	MACS_peak_137726	1686.7	445	ENSMUST00000105827	Hp1bp3	1686.7	24.33	4.77	15441	Hp1bp74
chr19	44293675	44294411	MACS_peak_98349	1684.15	736	NM_009128	Scd2	1684.15	10.29	4.76	20250	Mir5114|Scd-2|mir-5114|swty
chr4	22485673	22488366	MACS_peak_127675	1681.39	2693	NM_008899	Pou3f2	1681.39	9.82	4.74	18992	9430075J19Rik|A230098E07Rik|Brn-2|Brn2|OTF-7|Otf7|oct-7
chr8	70352777	70353273	MACS_peak_183963	1680.3	496	NM_030680	Upf1	1680.3	13.61	4.73	19704	B430202H16Rik|NORF1|PNORF-1|Rent1|Upflp
chr6	113702100	113702721	MACS_peak_159773	1677.21	621	uc009dhh.1	Tatdn2	1677.21	12.27	5.6	381801	AI646012|mKIAA0218
chr13	57428981	57429485	MACS_peak_49466	1671.75	504	NM_009262	Spock1	1671.75	27.54	5.66	20745	Spock|Ticn1|testican
chr4	138125809	138126634	MACS_peak_137692	1665.17	825	NM_172703	Eif4g3	1665.17	8.01	4.71	230861	1500002J22Rik|4833436O05|4930523M17Rik|G1-419-52|eIF4GII|repro8
chr2	52424589	52424901	MACS_peak_94930	1664.9	312	ENSMUST00000036541	Arl5a	1664.9	15.52	8.95	75423	2410015N24Rik|2810410P22Rik|AA408731|AW610751|Arl5|T25534
chr2	4603376	4604251	MACS_peak_100367	1655.85	875	NM_172475	Frmd4a	1655.85	12.25	4.69	209630	2700017I06Rik|5330420J21|AI594879|C230040M21Rik|Frmd4|Gm13190|OTTMUSG00000010806|mKIAA1294
chrX	102068151	102070101	MACS_peak_200688	1655.77	1950	NM_001278534	Rgag4	1655.77	28.3	5.6	331474	6430402L03Rik|Mar5|Mart5|mKIAA2001
chr2	73273124	73275092	MACS_peak_106490	1646.08	1968	NM_001005343	Sp9	1646.08	17.66	4.66	381373	-
chr8	46209021	46209508	MACS_peak_182360	1646.01	487	NM_007450	Slc25a4	1646.01	7.61	4.66	11739	AU019225|Ant1
chr19	59463879	59464527	MACS_peak_99910	1635.57	648	NM_010132	Emx2	1635.57	14.06	4.64	13797	Pdo
chr13	54679747	54681811	MACS_peak_50055	1633.5	2064	NM_134064	Rnf44	1633.5	9.52	4.63	105239	AI854545|mKIAA1100
chr8	110618637	110618993	MACS_peak_187504	1626.73	356	NM_146216	Vac14	1626.73	19.61	4.62	234729	AA959718|BC032215|D8Wsu151e|Tax1bp2|Trx|ingls
chr11	6599375	6602918	MACS_peak_24782	1626.02	3543	NM_001081652	Nacad	1626.02	10.49	4.61	192950	D230024G13Rik|mKIAA0363
chr9	65032777	65033338	MACS_peak_191869	1622.89	561	uc009qcr.1	Dpp8	1622.89	14.37	5.49	74388	2310004I03Rik|4932434F09Rik|AI666706|DPP VIII
chr15	10486048	10486699	MACS_peak_62427	1622.77	651	uc007vgi.1	Rad1	1622.77	28.03	5.49	19355	mRAD1
chr19	6976981	6977324	MACS_peak_93711	1621.87	343	NM_008889	Ppp1r14b	1621.87	12.04	5.56	18938	AOM172|PHI-1|PLCB3N|Png
chr2	25982781	25983282	MACS_peak_102052	1604.68	501	NM_001276359	Camsap1	1604.68	20.39	4.65	227634	9530003A05Rik|C77823|PRO2405
chr7	4992918	4995340	MACS_peak_166356	1600.25	2422	ENSMUST00000162731	Zfp579	1600.25	12.31	4.72	68490	1110003A17Rik|Znf579
chr11	96827197	96828223	MACS_peak_33014	1598.97	1026	NM_008686	Nfe2l1	1598.97	7.1	4.71	18023	AA408798|AW212678|LCR-F1|Lcrf1|NRF1|TCF-11|TCF11
chr14	25646716	25647600	MACS_peak_56084	1598.56	884	uc007srm.2	Zmiz1	1598.56	19.99	4.7	328365	BC065120|E330020C23|ENSMUSG00000072684|Gm10397|I920194n01|Rai17|Zimp10
chr11	75574558	75577575	MACS_peak_30425	1598.55	3017	ENSMUST00000042561	Slc43a2	1598.55	18.36	4.7	215113	7630402D21Rik|BC042513|Lat4
chr3	136670065	136670901	MACS_peak_112797	1598.16	836	NM_008913	Ppp3ca	1598.16	13.18	9.01	19055	2900074D19Rik|CN|Caln|Calna|CnA
chr19	6531267	6533217	MACS_peak_86274	1597.56	1950	NM_001205234	Nrxn2	1597.56	6.24	8.99	18190	6430591O13Rik|mKIAA0921
chr7	64695023	64696017	MACS_peak_171006	1596.92	994	NM_007461	Apba2	1596.92	10.59	4.68	11784	X11-like|X11L|XllL|mXllL
chr1	152845212	152845595	MACS_peak_9793	1596.87	383	NM_001005507	Smg7	1596.87	23.89	5.53	226517	9430023P16Rik|mKIAA0250
chr10	39369763	39370190	MACS_peak_14932	1594.51	427	ENSMUST00000063091	Fyn	1594.51	8.97	8.97	14360	AI448320|AW552119
chr14	26638073	26638486	MACS_peak_56241	1591.79	413	ENSMUST00000022429	Arf4	1591.79	20.16	4.67	11843	AA407803
chr4	129189759	129190072	MACS_peak_136208	1590.02	313	ENSMUST00000106054	Yars	1590.02	31.67	4.82	107271	AL024047|AU018965
chr9	7751671	7752325	MACS_peak_190221	1589.77	654	ENSMUST00000098994	Gm10709	1589.77	11.94	4.82	100039782	ENSMUSG00000074516
chr10	80115802	80116907	MACS_peak_19792	1588.21	1105	NM_011492	Stk11	1588.21	13.95	4.8	20869	AA408040|Lkb1|Par-4|R75140
chr9	37384508	37386543	MACS_peak_193061	1587.22	2035	NM_175189	Hepacam	1587.22	7.07	4.8	72927	2900042E01Rik|Glialcam|Hepn1
chr13	58215283	58215653	MACS_peak_50423	1583.85	370	NM_026842	Ubqln1	1583.85	9.69	4.78	56085	1110046H03Rik|1810030E05Rik|AU019746|C77538|D13Ertd372e|Da41|Dsk2|Plic-1|Plic1|Xdrp1
chr17	70973919	70974496	MACS_peak_85607	1579.51	577	ENSMUST00000038446	Myl12b	1579.51	8.63	4.77	67938	1500001M02Rik|C77744|Mylc2b|RLC-B
chr6	93678119	93679002	MACS_peak_146163	1579.49	883	NM_010367	Magi1	1579.49	12.77	9.15	14924	AIP3|BAP1|Baiap1|Gukmi1|MAGI1c|Magi-1|TNRC19|WWP3|mKIAA4129
chr17	57021088	57022970	MACS_peak_84594	1578.38	1882	NM_010613	Khsrp	1578.38	9.43	4.76	16549	6330409F21Rik|Fbp2|Fubp2|Ksrp
chr5	29735687	29736116	MACS_peak_142666	1578.04	429	ENSMUST00000008733	Dnajb6	1578.04	14.64	4.75	23950	Mrj|mDj4
chr8	83997671	83998565	MACS_peak_185217	1573.89	894	NM_001081415	Samd1	1573.89	14.21	4.74	666704	AA589507
chr5	36794930	36795944	MACS_peak_143790	1572.34	1014	NM_026242	Mrfap1	1572.34	7.72	4.72	67568	9130413I22Rik|AL022827|Pam14
chr7	105573681	105574416	MACS_peak_174591	1568.37	735	NM_009685	Apbb1	1568.37	13.24	4.79	11785	Fe65|Rir
chr13	78198119	78199757	MACS_peak_50814	1558.12	1638	ENSMUST00000091458	Nr2f1	1558.12	9.69	5.49	13865	COUP-TF1|COUP-TFI|COUPTFA|EAR3|Erbal3|SVP44|Tcfcoup1
chr16	91044005	91044543	MACS_peak_78349	1553.89	538	ENSMUST00000118522	Paxbp1	1553.89	16.47	4.74	67367	1810007M14Rik|C21orf66|Gcfc|Gcfc1|Pax3/7bp
chr13	73938864	73939182	MACS_peak_46578	1549.32	318	uc007rel.1	Brd9	1549.32	12.68	9.06	105246	AL022779
chr4	135324818	135325280	MACS_peak_137208	1546.29	462	NM_016799	Srrm1	1546.29	14.8	4.72	51796	AA407769|POP101|Srm160
chr12	112737838	112739509	MACS_peak_45957	1545.06	1671	NM_001024602	Cep170b	1545.06	7.59	4.71	217882	AI466840|AW555464|Kiaa0284|mKIAA0284
chr11	116336344	116338830	MACS_peak_35861	1539.66	2486	NM_027258	Rnf157	1539.66	12.96	4.7	217340	2610036E23Rik|A130073L17Rik|mKIAA1917
chr12	80108422	80110548	MACS_peak_42225	1538.91	2126	NM_007564	Zfp36l1	1538.91	8.21	4.69	12192	AW742437|AW743212|Berg36|Brf1|D530020L18Rik|ERF1|TIS11b|cMG1
chr3	51416015	51416376	MACS_peak_116825	1533.11	361	NM_053089	Naa15	1533.11	22.86	5.54	74838	5730450D16Rik|6330400I15|ASTBDN|Narg1|Tbdn-1|mNAT1
chr1	169742999	169743920	MACS_peak_11512	1530.38	921	NM_009062	Rgs4	1530.38	21.14	5.54	19736	AA004315|AA597169|ESTM48|ESTM50
chr12	76327565	76329957	MACS_peak_41143	1530.35	2392	NM_001101471	Akap5	1530.35	11.53	5.54	238276	3526401B18Rik|AKAP 150|AKAP-5|AKAP150|BB098886|Gm258|P150
chr5	31201582	31202042	MACS_peak_142890	1529.47	460	NM_001177901	Zfp513	1529.47	12.32	4.66	101023	AW990386|D430028M17Rik|Znf513
chr16	91828193	91828532	MACS_peak_77351	1527.99	339	NM_001110276	Itsn1	1527.99	10.99	5.53	16443	AA517634|AA545208|AI316805|AI839402|AI848451|Ehsh1|Ese1|Itsn|Sh3p17
chr2	30177592	30178429	MACS_peak_102757	1527.8	837	uc008jbl.2	D2Wsu81e	1527.8	26.11	4.66	227695	9930028P05|AL033358
chr9	13252487	13252798	MACS_peak_186386	1527.72	311	NM_025534	Ccdc82	1527.72	18.09	5.52	66396	2310043N13Rik
chr4	55350041	55350427	MACS_peak_130004	1513.82	386	NM_009011	Rad23b	1513.82	6.49	4.7	19359	0610007D13Rik|AV001138|HR23B|mHR23B|p58
chr1	133914444	133915421	MACS_peak_8896	1513.06	977	NM_054077	Prelp	1513.06	22.02	4.7	116847	7330409J17Rik|SLRR2A
chr6	29372470	29372851	MACS_peak_153129	1512.97	381	ENSMUST00000156163	Calu	1512.97	13.01	5.48	12321	9530075H20Rik
chr5	38230560	38230990	MACS_peak_141272	1511.39	430	NM_025281	Lyar	1511.39	19.9	5.47	17089	MLZ-264
chr1	194619828	194620397	MACS_peak_13686	1507.24	569	NM_008882	Plxna2	1507.24	13.22	4.76	18845	2810428A13Rik|AA589422|AW457381|OCT|PlexA2|Plxn2|mKIAA0463
chr11	87127074	87127494	MACS_peak_31883	1504.93	420	NM_197987	Trim37	1504.93	10.02	5.45	68729	1110032A10Rik|2810004E07Rik|AI848587|AU043018|MUL|TEF3|mKIAA0898
chr1	72851997	72852474	MACS_peak_4769	1504.28	477	ENSMUST00000047328	Igfbp2	1504.28	6.64	4.83	16008	AI255832|IBP-2|Igfbp-2|mIGFBP-2
chr15	76249216	76249904	MACS_peak_67366	1503.82	688	NM_023168	Grina	1503.82	7.03	4.82	66168	1110025J15Rik|Lag|Tmbim3
chr8	70107440	70108649	MACS_peak_183873	1503.49	1209	NM_007789	Ncan	1503.49	13.4	4.82	13004	C230035B04|Cspg3|Cspg3-rs|Tgfbit
chr18	27598643	27599393	MACS_peak_80882	1501.2	750	ENSMUST00000050143	Gm7729	1501.2	13.22	8.85	665646	EG665646
chr5	112475028	112475586	MACS_peak_149022	1499.74	558	NM_019982	Sez6l	1499.74	12.59	4.8	56747	AI843918|AIG1|AW539724|Acig1|BSRP-B|mKIAA0927
chr17	71657475	71657905	MACS_peak_84379	1498.49	430	NM_175639	Wdr43	1498.49	15.04	5.5	72515	2610318G08Rik|AU020887|AV024208|Wrd43|mKIAA0007
chr2	109917646	109918305	MACS_peak_108784	1497.74	659	NM_172671	Lgr4	1497.74	23.68	4.79	107515	9130225G07|A330106J01Rik|A930009A08Rik|Gpr48
chr8	107580589	107581319	MACS_peak_183382	1493.65	730	NM_010817	Psmd7	1493.65	8.87	5.49	17463	AW107203|Mov-34|Mov34
chr9	61372365	61373461	MACS_peak_195770	1493.12	1096	NM_009389	Tle3	1493.12	9.13	4.85	21887	2610103N05Rik|ESG|Grg3a|Grg3b|mKIAA1547
chr11	69343272	69344478	MACS_peak_29698	1489.04	1206	NM_146019	Chd3	1489.04	7	4.83	216848	2600010P09Rik|AF020312|Chd7|Prp7|Prp9-1
chr8	4257645	4258647	MACS_peak_161846	1485.07	1002	NM_183315	Ctxn1	1485.07	6.69	8.77	330695	BC028881|Ctxn
chr7	5097571	5098178	MACS_peak_166387	1482.93	607	NM_010147	Epn1	1482.93	7.9	4.82	13854	AA269831|Ibp1
chr4	141874559	141874920	MACS_peak_135619	1481.17	361	NM_025994	Efhd2	1481.17	11.66	5.6	27984	2600015J22Rik|AA408606|D4Wsu27e
chr2	127595663	127596057	MACS_peak_110443	1475.94	394	uc008mft.1	Mrps5	1475.94	13.48	4.8	77721	1620401I16Rik|AI850294
chr5	23501523	23503462	MACS_peak_141861	1474.16	1939	NM_026984	Kmt2e	1474.16	15.43	4.79	69188	1810033J14Rik|9530077A04Rik|D230038D11Rik|Mll5|NKp44L
chr19	6057966	6058325	MACS_peak_95116	1473.71	359	NM_001190436	Fau	1473.71	7.82	4.79	14109	MNSFbeta
chrX	136170507	136171049	MACS_peak_206091	1472.27	542	NM_025703	Tceal8	1472.27	12.38	4.78	66684	3930402F23Rik
chr11	95748999	95750147	MACS_peak_30014	1470.8	1148	uc007laq.1	Zfp652	1470.8	7.75	8.7	268469	9530033F24Rik|ZNF652
chr10	127094270	127096372	MACS_peak_23789	1469.99	2102	NM_177614	Os9	1469.99	11.45	5.57	216440	4632413K17Rik|AU022351
chr10	79863144	79864771	MACS_peak_19755	1468.29	1627	ENSMUST00000165704	Ptbp1	1468.29	17.83	5.56	19205	AA407203|AL033359|HNRPI|PTB-1|PTB2|PTB3|PTB4|Ptb|pPTB
chr8	124662847	124663369	MACS_peak_189460	1467.1	522	NM_175149	2310022B05Rik	1467.1	13.07	4.77	69551	-
chr5	143264292	143264681	MACS_peak_153810	1465.83	389	NM_017467	Zfp316	1465.83	12.73	4.75	54201	Emzf1|Mzf3|Znf316
chr2	32363197	32363656	MACS_peak_101450	1463.84	459	NM_001252534	Ciz1	1463.84	18.88	5.54	68379	0610038H21Rik|2900056O04Rik|LSFR1|ZNF356
chr4	127021300	127022220	MACS_peak_135734	1459.27	920	NM_023603	Sfpq	1459.27	6.04	4.8	71514	1110004P21Rik|2810416M14Rik|5730453G22Rik|9030402K04Rik|AU021830|D4Ertd314e|Gm12940|OTTMUSG00000009329|PSF|REP1
chr9	72532239	72532980	MACS_peak_192927	1456.52	741	NM_001033536	Rfx7	1456.52	9.1	5.59	319758	2510005N23Rik|9930116O05Rik|D130086K05Rik|Rfxdc2
chr16	11134267	11134650	MACS_peak_71118	1454.5	383	ENSMUST00000038424	Txndc11	1454.5	45.48	5.58	106200	2810408E11Rik|AI427833|EFP1|Txdc11
chr16	17277971	17278585	MACS_peak_73027	1453.04	614	NM_177473	Tmem191c	1453.04	12.36	4.78	224019	4933405M22Rik|D16Bwg1494e|MNCb-4137
chr6	39420098	39420462	MACS_peak_142417	1452.76	364	ENSMUST00000031985	Mkrn1	1452.76	12.4	8.66	54484	RFP
chr17	4994938	4996492	MACS_peak_79370	1449.96	1554	ENSMUST00000092723	Arid1b	1449.96	11.3	4.77	239985	8030481M12|9330189K18Rik|AI836955|Ardi1b|B230217J03Rik|mKIAA1235
chr3	93444558	93448045	MACS_peak_110041	1445.52	3487	NM_001163098	Tchh	1445.52	13.32	8.6	99681	AHF|AI597080|Thh
chr10	80311032	80318263	MACS_peak_19847	1440.51	7231	ENSMUST00000105359	Apc2	1440.51	6.85	4.74	23805	AI852447|APCL|R75424
chr1	135470479	135471170	MACS_peak_9125	1434.45	691	NM_173437	Nav1	1434.45	8.39	4.72	215690	9530089B19|9930003A20Rik|C230080M11Rik|Pomfil3|Unc53h1|mKIAA1151|steerin-1
chr2	27426275	27427033	MACS_peak_102284	1432.07	758	ENSMUST00000056176	Vav2	1432.07	19.69	4.71	22325	2810040F13Rik|AI847175|Vav-2
chr8	71658255	71658801	MACS_peak_184236	1431.73	546	NM_001029873	Unc13a	1431.73	15.95	4.71	382018	2410078G03Rik|Munc13-1
chr7	127708435	127708914	MACS_peak_177011	1431.66	479	ENSMUST00000061468	Bcl7c	1431.66	11.94	4.71	12055	C230096E12Rik
chr15	88978515	88978893	MACS_peak_68386	1427.46	378	ENSMUST00000042594	Mlc1	1427.46	14.09	5.61	170790	AW048630|BB074274|Kiaa0027-hp|LVM|MLC|VL|WKL1|mKIAA0027
chr5	137746847	137747859	MACS_peak_153048	1421.92	1012	NM_023910	Tsc22d4	1421.92	17.3	4.81	78829	0610009M14Rik|1700023B23Rik|AI415410|Thg-1pit|Tilz2
chr3	75894834	75895137	MACS_peak_118329	1421.77	303	NM_175193	Golim4	1421.77	15.86	5.59	73124	3110027H23Rik|GIMPC|GPP130|Golph4|P138
chr9	54699558	54699860	MACS_peak_194940	1421.03	302	NM_021422	Dnaja4	1421.03	32.08	4.8	58233	1110021L12Rik|AV358213|Dj4|Hsj4|mmDjA4
chr7	15937837	15938230	MACS_peak_166681	1420.24	393	uc009fgs.1	Gltscr2	1420.24	23.95	4.8	68077	5330430H08Rik|9430097C02Rik|AU041936|AW536441|PICT-1|R74911
chr11	77930806	77931114	MACS_peak_30854	1418.72	308	ENSMUST00000093995	Sez6	1418.72	10.39	4.79	20370	BSRP-C|D11Bhm177e|sez-6
chr15	36790683	36790988	MACS_peak_64878	1415.42	305	NM_011740	Ywhaz	1415.42	5.18	4.78	22631	1110013I11Rik|14-3-3zeta|AI596267|AL022924|AU020854
chr2	125100119	125100420	MACS_peak_108343	1413.2	301	uc008mcc.2	Myef2	1413.2	14.71	5.6	17876	9430071B01|mKIAA1341
chr7	126491710	126493001	MACS_peak_159908	1411.24	1291	uc009jrt.1	Atxn2l	1411.24	7.1	8.49	233871	A2D|A2LG|A2RP|A2lp|Atxnl2
chr5	102069595	102069921	MACS_peak_133368	1407.46	326	NM_172882	Wdfy3	1407.46	15.13	8.45	72145	2610509D04Rik|ALFY|AW319683|B930017C24|BWF1|Bchs|D5Ertd66e|Ggtb3|ZFYVE25|mKIAA0993
chr7	30306805	30308367	MACS_peak_152184	1403.47	1562	NM_001081114	Clip3	1403.47	7.18	8.41	76686	1500005P14Rik|AI844915|Clipr-59
chr17	80290055	80290476	MACS_peak_84898	1401.04	421	NM_198942	Dhx57	1401.04	22.27	5.56	106794	AW494914
chr6	99692678	99693818	MACS_peak_162126	1399.1	1140	NM_008158	Gpr27	1399.1	16.94	4.78	14761	-
chr4	155221551	155222592	MACS_peak_140153	1395.83	1041	ENSMUST00000030917	Ski	1395.83	11.59	4.78	20481	2310012I02Rik|2610001A11Rik|AA062172|AA589460|BC004088
chr7	30649937	30650292	MACS_peak_165096	1394.71	355	ENSMUST00000042726	Rbm42	1394.71	13.48	5.53	68035	1700003D06Rik|3100004P22Rik
chr2	157078228	157079265	MACS_peak_111517	1390.82	1037	NM_001164663	Soga1	1390.82	10.13	5.52	320706	9830001H06Rik|AI426038|D430036N24Rik|Soga
chr2	26964051	26964386	MACS_peak_102194	1390.58	335	NM_207234	Rexo4	1390.58	15.99	4.82	227656	Gm111|Rex4|Xpmc2h
chr4	62523718	62524110	MACS_peak_130539	1390.13	392	ENSMUST00000030091	Pole3	1390.13	11.23	4.81	59001	1810034K18Rik|YBL1
chr5	47983154	47985218	MACS_peak_141592	1389.29	2064	NM_178804	Slit2	1389.29	33.08	5.51	20563	Drad-1|E030015M03Rik|E130320P19Rik|Slil3|mKIAA4141|slit-2
chr14	103099161	103099554	MACS_peak_61431	1387.42	393	ENSMUST00000022720	Fbxl3	1387.42	12.35	4.79	50789	AU041772|AW212966|FBK|Fbl3a|Fbxl3a|Ovtm|Play68
chr11	118354960	118355506	MACS_peak_36263	1383.84	546	ENSMUST00000017610	Timp2	1383.84	8.21	4.77	21858	D11Bwg1104e|Timp-2
chr10	42761495	42761888	MACS_peak_16774	1382.36	393	NM_153055	Sec63	1382.36	21.87	5.56	140740	5730478J10Rik|AI649014|AW319215
chr13	55569704	55571120	MACS_peak_50205	1381.75	1416	NM_145382	Fam193b	1381.75	14.63	4.77	212483	IRIZIO|Kiaa1931
chr12	59061155	59061461	MACS_peak_40719	1380.55	306	NM_030057	Trappc6b	1380.55	10.61	4.77	78232	5830498C14Rik|C79212
chr15	77306363	77307032	MACS_peak_66638	1378.03	669	NM_053104	Rbfox2	1378.03	15.55	5.53	93686	Fbm2|Fxh|Hrnbp2|Rbm9
chr13	21722043	21722523	MACS_peak_46852	1376.74	480	NM_178200	Hist1h2bm	1376.74	13.58	5.53	319186	H2b-291b
chr14	26579549	26579862	MACS_peak_56222	1376.63	313	NM_145969	Dennd6a	1376.63	17.31	4.76	211922	Fam116a
chr4	129730002	129730325	MACS_peak_136309	1370.09	323	uc008uye.2	Khdrbs1	1370.09	6.96	4.73	20218	Sam68|p62|p68
chr3	10088172	10089618	MACS_peak_114811	1365.6	1446	ENSMUST00000061419	Gm9833	1365.6	10.97	5.49	100041480	ENSMUSG00000049230
chr5	122501567	122502225	MACS_peak_147709	1362.79	658	NM_009722	Atp2a2	1362.79	11.2	5.47	11938	9530097L16Rik|D5Wsu150e|SERCA2|SERCA2B|Serca2a|mKIAA4195
chr17	37048420	37049467	MACS_peak_83162	1354.82	1047	uc008clz.1	Gabbr1	1354.82	12.28	4.81	54393	GABAB1|GABAbR1|bM573K1.1
chr13	98815075	98815429	MACS_peak_51923	1351.82	354	NM_172591	Fcho2	1351.82	14.81	5.42	218503	5832424M12Rik|AA387320
chr2	79635355	79635744	MACS_peak_105213	1351.22	389	ENSMUST00000111785	Ssfa2	1351.22	8.65	5.42	70599	5730488C15Rik|CS-1|CS1|KRAP|SPAG13|mKIAA1927
chr2	134598312	134598865	MACS_peak_111092	1343.07	553	NM_029148	Tmx4	1343.07	11.47	4.78	52837	2810417D04Rik|4930500L08Rik|AI843224|AW046784|D2Bwg1356e|Txndc13|mKIAA1162
chr9	22051589	22052023	MACS_peak_191423	1334.75	434	NM_010487	Elavl3	1334.75	12.67	4.77	15571	2600009P04Rik|Huc|PLE21|mHuC
chr5	120627059	120627487	MACS_peak_147331	1331.63	428	NM_028041	Ddx54	1331.63	10.8	5.43	71990	2410015A15Rik|AI414901|DP97
chr9	118555572	118559783	MACS_peak_201311	1329.98	4211	NM_018748	Golga4	1329.98	15.06	4.75	54214	AI225887|AU019508|Olp-1
chr5	92939976	92943139	MACS_peak_147213	1327.14	3163	NM_015756	Shroom3	1327.14	9.14	4.74	27428	AL022960|D5Ertd287e|Shrm|Shrm3
chr8	33386324	33387531	MACS_peak_177942	1326	1207	ENSMUST00000070340	Purg	1326	13.66	5.47	75029	4930486B15Rik
chr9	108204890	108209661	MACS_peak_200178	1325.98	4771	NM_010017	Dag1	1325.98	8.61	4.73	13138	D9Wsu13e|DG|Dp427|Dp71
chr17	57080065	57081747	MACS_peak_84607	1324.82	1682	NM_009451	Tubb4a	1324.82	5.96	4.72	22153	AI325297|M(beta)4|Tubb|Tubb4
chr10	120227185	120227549	MACS_peak_23203	1324.35	364	ENSMUST00000130198	Llph	1324.35	13.4	4.72	66225	1190005P17Rik
chr5	37291116	37292153	MACS_peak_143928	1317.01	1037	NM_007765	Crmp1	1317.01	5.69	4.69	12933	CRMP-1|DRP-1|Dpysl1|ULIP-3|Ulip3
chr2	25272510	25273537	MACS_peak_100269	1307.9	1027	uc008ire.2	Anapc2	1307.9	13.82	5.37	99152	9230107K09Rik|AL024279|Apc2|Emi4|Imi4|mKIAA1406
chr5	149050587	149051300	MACS_peak_151374	1306.92	713	ENSMUST00000110505	Hmgb1	1306.92	17.6	5.36	15289	HMG-1|Hmg1|SBP-1|p30
chr7	16875316	16875673	MACS_peak_166909	1306.5	357	NM_001081655	Dact3	1306.5	26.6	4.65	629378	EG666671|naa-3
chr12	79172219	79172667	MACS_peak_38187	1304.5	448	ENSMUST00000055262	Vti1b	1304.5	12.76	8.64	53612	AU015348|GES30|MVti1b|SNARE|Vti1-rp1
chr2	153316216	153317684	MACS_peak_110876	1301.71	1468	NM_008444	Kif3b	1301.71	13.72	5.34	16569	AI854312|AW549267|mKIAA0359
chr2	32204008	32204324	MACS_peak_103163	1300.98	316	NM_172661	Prrc2b	1300.98	6.54	4.64	227723	5830434P21Rik|AI173903|Bat2l|Bat2l1|D430039P21|mKIAA0515
chr4	141793611	141793986	MACS_peak_124795	1296.12	375	NM_015733	Casp9	1296.12	44.77	8.61	12371	AI115399|APAF-3|AW493809|CASP-9|Caspase-9|ICE-LAP6|Mch6
chr1	42697145	42700112	MACS_peak_2596	1295.49	2967	NM_008900	Pou3f3	1295.49	8.73	4.69	18993	Brn-1|Brn1|Otf8|Skin1
chr2	117270605	117271329	MACS_peak_107473	1283.86	724	NM_026620	Fam98b	1283.86	23.75	5.34	68215	2610510H03Rik
chr4	32760619	32760942	MACS_peak_125732	1282.19	323	NM_001081392	Mdn1	1282.19	14.91	5.33	100019	4833432B22Rik|A130070M06|AA958993|D4Abb1e|Gm135
chr7	144409461	144411868	MACS_peak_178676	1281.65	2407	NM_001081370	Shank2	1281.65	8.4	4.76	210274	ProSAP1|mKIAA1022
chr7	45699842	45700339	MACS_peak_169363	1281.55	497	ENSMUST00000003360	Car11	1281.55	19.67	4.76	12348	Ca11
chr17	14990546	14991577	MACS_peak_80563	1280.65	1031	NM_001123370	9030025P20Rik	1280.65	16.82	4.76	100041574	D17Zt9e
chr8	11312515	11312826	MACS_peak_179399	1273.5	311	NM_009931	Col4a1	1273.5	12	4.81	12826	Bru|Col4a-1|Raw|Svc
chr10	81565471	81566371	MACS_peak_20164	1261.65	900	NM_010347	Aes	1261.65	10.8	4.85	14797	AL024115|Esp1|Grg|Grg-5|Grg5|Tle5
chr7	65370809	65371244	MACS_peak_154651	1260.4	435	NM_009386	Tjp1	1260.4	12.31	8.5	21872	ZO1
chr12	85028770	85030887	MACS_peak_42396	1256.52	2117	NM_178363	Ylpm1	1256.52	9.13	5.25	56531	A930013E17Rik|ZAP|Zap3
chr8	61549570	61550245	MACS_peak_179467	1255.34	675	NM_001293772	Palld	1255.34	7.64	5.23	72333	2410003B16Rik|6030492A02
chr13	51847868	51848474	MACS_peak_45213	1252.15	606	NM_011817	Gadd45g	1252.15	8.72	8.43	23882	AI327420|C86281|CR6|DDIT2|OIG37
chr15	82169737	82170154	MACS_peak_68492	1251.74	417	NM_033218	Srebf2	1251.74	7.68	4.83	20788	AI608257|SREBP-2|SREBP2|SREBP2gc|bHLHd2|lop13|nuc
chr5	131437802	131440693	MACS_peak_148936	1250.98	2891	NM_177047	Auts2	1250.98	13.87	5.22	319974	2700063G02Rik|A730011F23Rik|D830032G16Rik
chr14	39471971	39473088	MACS_peak_57660	1250.14	1117	NM_008734	Nrg3	1250.14	10.38	4.82	18183	ska
chr11	98154597	98158469	MACS_peak_30326	1248.83	3872	NM_013634	Med1	1248.83	8.92	8.42	19014	AI480703|CRSP210|DRIP205|PBP|Pparbp|TRAP220|l11Jus15
chr15	76521611	76522129	MACS_peak_66460	1248.39	518	NM_130893	Scrt1	1248.39	14.64	5.21	170729	-
chr1	22805560	22805994	MACS_peak_1195	1245.12	434	ENSMUST00000097808	Rims1	1245.12	12.01	4.81	116837	C030033M19Rik|RIM1|RIM1a|RIM1alpha|Rab3ip1|Rim|Serg1|mKIAA0340
chr5	34465573	34466447	MACS_peak_140640	1244.53	874	NM_001243123	Fam193a	1244.53	14.7	5.2	231128	-
chr18	84012608	84016241	MACS_peak_94273	1238.99	3633	NM_001081300	Tshz1	1238.99	8.04	4.8	110796	5730407I04Rik|D18Bwg1409e|Mtsh1|NY-CO-33|Sdccag33|Tsh1|mKIAA4206|teashirt1
chr2	84742168	84742700	MACS_peak_105430	1237.49	532	ENSMUST00000181711	Gm19426	1237.49	44.34	5.23	100502874	-
chr11	77470484	77472378	MACS_peak_30764	1232.47	1894	ENSMUST00000145934	Ankrd13b	1232.47	9.72	4.77	268445	AW124583|B930093C12Rik
chr13	100060298	100061506	MACS_peak_52053	1231.91	1208	NM_001081061	Bdp1	1231.91	12.04	5.21	544971	AI662220|AW049390|AW456745|B130055N23Rik|G630013P12Rik|TAF3B1|TFC5|TFIIIB150|TFIIIB90|Tfnr|mKIAA1241
chr15	74588686	74589464	MACS_peak_67212	1231.89	778	NM_174991	Adgrb1	1231.89	10.18	4.76	107831	B830018M07Rik|Bai1|R75078|mKIAA4089
chr3	90079520	90079863	MACS_peak_119542	1231.55	343	NM_001253738	Tpm3	1231.55	7.13	5.2	59069	TM30nm|TMnm|Tm5NM|Tpm-5|Tpm5|Trop-5|gamma-TM|hTM30nm|hTMnm
chr1	36558015	36558361	MACS_peak_2080	1229.82	346	NM_001126047	Sema4c	1229.82	56.66	5.24	20353	AI426163|M-Sema F|Semacl1|Semaf|Semai|sema I
chr1	75431346	75432066	MACS_peak_5053	1227.98	720	NM_007463	Speg	1227.98	17.85	4.81	11790	AW125581|Apeg1|BPEG|D1Bwg1450e|SPEGalpha|SPEGbeta|mKIAA1297
chr19	5493380	5494031	MACS_peak_86032	1227.4	651	NM_007687	Cfl1	1227.4	6.28	8.38	12631	AA959946|Cof
chr13	23621711	23622558	MACS_peak_46947	1225.38	847	uc007puj.2	Hist1h1e	1225.38	5.63	5.23	50709	H1-4|H1.4|H1e|H1f4|H1s-4|H1var2
chr8	83667878	83670408	MACS_peak_185161	1224.42	2530	uc009mku.1	Ptger1	1224.42	12.55	4.79	19216	42kDa|EP1|Ptgerep1
chrX	7947124	7947767	MACS_peak_202181	1223.91	643	ENSMUST00000154244	Hdac6	1223.91	24.48	4.79	15185	Hd6|Hdac5|Sfc6|mHDA2
chr3	88168631	88170918	MACS_peak_121264	1223.07	2287	ENSMUST00000001455	Mef2d	1223.07	11.28	4.79	17261	C80750
chr2	153345844	153346390	MACS_peak_112700	1222.38	546	ENSMUST00000109790	Asxl1	1222.38	13.46	4.78	228790	mKIAA0978
chr6	42351474	42351969	MACS_peak_142674	1220.12	495	NM_011777	Zyx	1220.12	13.22	8.33	22793	9530098H06Rik|R75157
chr13	21810366	21810918	MACS_peak_47685	1215.21	552	NM_001177544	Hist1h2ao	1215.21	10.07	4.82	665433	-
chr9	110386730	110388651	MACS_peak_200512	1211.4	1921	NM_001081043	Ptpn23	1211.4	6.26	4.81	104831	AI462446|PTP-TD14
chr10	95563661	95564167	MACS_peak_21753	1210.78	506	NM_027722	Nudt4	1210.78	9.05	4.81	71207	4933436C10Rik|DIPP2|DIPP2alpha|DIPP2beta|HDCMB47P
chr12	75595634	75596200	MACS_peak_41715	1208.14	566	NM_012024	Ppp2r5e	1208.14	12.23	4.79	26932	4633401M22Rik|AI449017|B56beta
chr9	58489607	58490392	MACS_peak_195448	1207.31	785	uc009pxa.1	6030419C18Rik	1207.31	20.24	4.78	319477	-
chr5	31192581	31193139	MACS_peak_140149	1203.19	558	NM_001127356	Eif2b4	1203.19	17.14	5.46	13667	Eif2b
chr13	110395047	110395607	MACS_peak_53751	1201.72	560	uc007rvr.1	Plk2	1201.72	14.56	4.76	20620	Snk
chr1	66425196	66425528	MACS_peak_4282	1199.79	332	NM_008632	Map2	1199.79	8.64	4.76	17756	G1-397-34|MAP-2|Mtap-2|Mtap2|repro4
chr9	79792973	79793441	MACS_peak_193419	1197.01	468	ENSMUST00000120690	Tmem30a	1197.01	9.17	5.44	69981	2010200I23Rik|AW540225|Cdc50a|D9Wsu20e
chr1	72873805	72874884	MACS_peak_4772	1196.81	1079	ENSMUST00000027377	Igfbp5	1196.81	9.21	4.74	16011	AI256729|AW208790|IGFBP-5|IGFBP-5P
chr12	67220969	67222549	MACS_peak_41004	1196.38	1580	NM_207010	Mdga2	1196.38	25.62	4.74	320772	6720489L24Rik|9330209L04Rik|Adp|Mamdc1
chr13	21716411	21716964	MACS_peak_47671	1195.84	553	ENSMUST00000070124	Hist1h2ai	1195.84	9	4.73	319191	H2a-291A
chr3	146812637	146812960	MACS_peak_125664	1194.54	323	ENSMUST00000102515	Prkacb	1194.54	15.73	4.73	18749	CbPKA|Pkacb
chr15	98949840	98951014	MACS_peak_70466	1194.16	1174	ENSMUST00000097014	Tuba1a	1194.16	5.16	4.73	22142	Tuba-1|Tuba1
chr8	4524414	4525716	MACS_peak_175310	1192.19	1302	NM_026058	Cers4	1192.19	9.31	5.48	67260	2900019C14Rik|Lass4|Trh1
chr3	89164794	89165106	MACS_peak_119361	1191.05	312	ENSMUST00000121212	Clk2	1191.05	14.23	5.47	12748	AU041688
chrX	152272708	152275262	MACS_peak_206826	1190.03	2554	NM_013668	Kdm5c	1190.03	12.9	4.71	20591	D930009K15Rik|Jarid1c|Smcx|mKIAA0234
chr7	89980411	89980983	MACS_peak_169463	1188.27	572	ENSMUST00000107234	Eed	1188.27	17.58	5.46	13626	ENSMUSG00000039373|l(7)5Rn|l7Rn5|lusk
chr17	34895236	34896844	MACS_peak_81692	1185.8	1608	NM_198886	Zbtb12	1185.8	20.95	5.44	193736	BC020447|Bat-9|Bat9|G10|NG35
chr7	118852402	118853340	MACS_peak_172557	1185.29	938	NM_023197	Knop1	1185.29	10.09	5.49	66356	2310008H09Rik|Tsg118
chr12	112959861	112960358	MACS_peak_46002	1183.02	497	NM_028193	Brf1	1183.02	14.77	4.74	72308	2510002F24Rik|GTF3B|TAF3C|TAFIII90|TFIIIB90|mTFIIIB90
chr18	34862464	34864751	MACS_peak_89711	1182.1	2287	NM_007913	Egr1	1182.1	14.71	4.73	13653	A530045N19Rik|ETR103|Egr-1|Krox-1|Krox-24|Krox24|NGF1-A|NGFI-A|NGFIA|TIS8|Zenk|Zfp-6|Zif268|egr
chr1	131827976	131828393	MACS_peak_8531	1179.89	417	ENSMUST00000086559	Slc41a1	1179.89	17.53	4.79	98396	AI573938|B230315F01Rik
chr18	78856483	78859931	MACS_peak_93885	1178.55	3448	NM_053099	Setbp1	1178.55	5.38	4.78	240427	C130092E12|Seb|mKIAA0437
chr5	115134666	115134975	MACS_peak_146623	1178.26	309	NM_175352	Unc119b	1178.26	21.97	5.58	106840	AA407659|AI414892
chr7	16275463	16276107	MACS_peak_163603	1174.98	644	NM_172297	Ccdc9	1174.98	18.87	5.57	243846	2600011L02Rik
chr2	125505088	125506477	MACS_peak_110228	1173.44	1389	ENSMUST00000066157	Gm9913	1173.44	27.93	4.76	100036535	ENSMUSG00000053615
chrX	48378943	48379330	MACS_peak_183602	1170.39	387	NM_178782	Bcorl1	1170.39	15.73	8.3	320376	6720425J07Rik|B930011H20Rik
chr1	188971686	188972683	MACS_peak_13213	1169.86	997	NM_172650	Kctd3	1169.86	16.04	4.75	226823	4930438A20Rik|9330185B06|E330032J19Rik|NY-REN-45
chrX	163953273	163953656	MACS_peak_207368	1167.55	383	NM_178794	Zrsr2	1167.55	14.7	4.75	22184	35kDa|5031411E02Rik|A230052C13Rik|C77286|U2af1-rs2|URP
chr17	32336284	32336738	MACS_peak_81363	1163.7	454	NM_017476	Akap8l	1163.7	10.59	5.53	54194	HAP95|Nakap95
chr2	164507274	164508194	MACS_peak_114289	1162.24	920	NM_133779	Pigt	1162.24	11.01	4.71	78928	2510012P17Rik|4930534E15Rik|CGI-06|NDAP|Ndap7
chr3	45378397	45382492	MACS_peak_118765	1160.83	4095	NM_011043	Pcdh10	1160.83	9.66	4.7	18526	6430521D13Rik|6430703F07Rik|OL-pc|mKIAA1400
chr9	98032860	98033181	MACS_peak_198962	1158.75	321	ENSMUST00000035027	Clstn2	1158.75	17.58	4.7	64085	2900042C18Rik|AI448973|CSTN2|Cs2|Cst-2|mKIAA4134
chr6	94699461	94700158	MACS_peak_158712	1158.45	697	ENSMUST00000032105	Lrig1	1158.45	13.33	5.49	16206	D6Bwg0781e|Img|LIG-1
chr15	81744847	81745346	MACS_peak_68395	1158.13	499	NM_001081016	Zc3h7b	1158.13	15.47	4.69	20286	Gm627|Scrg3|Zc2h7b|mKIAA1031
chr8	84969856	84970344	MACS_peak_185484	1157.54	488	ENSMUST00000125893	Prdx2	1157.54	8.02	4.69	21672	AL022839|Band-8|NkefB|PRP|PrxII|TDX1|TPx|TPx-B|TR|TSA|Tdpx1|Torin
chr17	35979126	35980236	MACS_peak_75359	1156.26	1110	ENSMUST00000055454	Prr3	1156.26	10.55	8.33	75210	4930540G07Rik|Cat56
chr16	66659495	66660903	MACS_peak_69766	1154.95	1408	NM_178721	Cadm2	1154.95	25	8.32	239857	2900078E11Rik|9330131D06|A830029E02Rik|Igdf4d|Igsf4d|NECL3|SynCAM 2|SynCAM2
chr8	4212885	4215081	MACS_peak_178918	1154.89	2196	NM_207203	Prr36	1154.89	8.79	4.72	73072	-
chr13	21753376	21753912	MACS_peak_43113	1153.73	536	NM_178183	Hist1h2ak	1153.73	7.16	8.3	319169	-
chr16	57121713	57122194	MACS_peak_76617	1153.52	481	NM_138599	Tomm70a	1153.52	10.68	4.71	28185	2610044B22Rik|D16Ium22|D16Ium22e|D16Wsu109e|Tom70|Tomm70|mKIAA0719
chr9	98992512	98992939	MACS_peak_179777	1153.2	427	uc009rds.1	Faim	1153.2	6.9	8.37	23873	-
chr8	108946316	108950646	MACS_peak_187362	1153.03	4330	NM_007496	Zfhx3	1153.03	20.98	4.7	11906	A230102L03Rik|Atbf1|Sci|WBP9|mKIAA4228
chr15	79163288	79163794	MACS_peak_61667	1151.89	506	NM_011437	Sox10	1151.89	21.24	8.35	20665	Dom|Sox21|gt
chr10	7919113	7920614	MACS_peak_14174	1150.96	1501	NM_138667	Tab2	1150.96	8.78	4.69	68652	1110030N06Rik|A530078N03Rik|Map3k7ip2|mKIAA0733
chr17	36857399	36858819	MACS_peak_83144	1149.55	1420	NM_001025599	Trim26	1149.55	24.22	4.68	22670	AI462198|Zfp173|Zfp1736
chr16	91269768	91271917	MACS_peak_78419	1149.44	2149	NM_016968	Olig1	1149.44	4.36	4.67	50914	AI836478|AW494459|Bhlhb6|Olg-1|Oligo1|bHLHe21
chr13	54736670	54740613	MACS_peak_50063	1149.11	3943	ENSMUST00000135343	Gprin1	1149.11	7.61	4.66	26913	GRIN1|Z16
chr8	83932328	83934606	MACS_peak_185203	1149.06	2278	ENSMUST00000098595	Gm10644	1149.06	13.39	4.66	100126034	ENSMUSG00000074219
chr6	86956258	86956572	MACS_peak_160746	1146.65	314	NM_177762	Aak1	1146.65	10.79	4.65	269774	5530400K14Rik|9630042K20|AU067724|AU067726|BC028270|C79663|D6Ertd245e|R75501|mKIAA1048
chr8	33599620	33600018	MACS_peak_181701	1143.23	398	NM_017374	Ppp2cb	1143.23	13.16	4.63	19053	AI115466|D8Ertd766e|PP2Ac
chr19	55741809	55742530	MACS_peak_99392	1141.15	721	NM_009333	Tcf7l2	1141.15	24.31	4.62	21416	TCF4B|TCF4E|Tcf-4|Tcf4|mTcf-4B|mTcf-4E
chr3	107330790	107333289	MACS_peak_123306	1140.54	2499	NM_001045807	Rbm15	1140.54	14.47	4.62	229700	C230088J01Rik|mKIAA1438
chr7	143459794	143460716	MACS_peak_174867	1138.37	922	NM_001161624	Cdkn1c	1138.37	27.52	5.43	12577	AL024410|CDKI|Kip2|p57(kip2)|p57Kip2
chr15	99126577	99126887	MACS_peak_70483	1136.66	310	ENSMUST00000063517	Spats2	1136.66	18.9	4.66	72572	2700012F11Rik|59kDa|Scr59|p59
chr8	70509520	70509945	MACS_peak_184013	1133.69	425	ENSMUST00000124967	Uba52	1133.69	6.38	4.71	22186	D8Ertd21e|Gm1863|Rps27a|Ubb|Ubc
chr8	121730558	121731004	MACS_peak_188870	1131.35	446	NM_020605	Jph3	1131.35	19.1	4.7	57340	JP-3|Jp3
chr7	125662060	125662447	MACS_peak_173079	1130.89	387	uc009jqj.1	Gtf3c1	1130.89	17.12	5.45	233863	-
chr3	105716368	105718710	MACS_peak_120911	1129.4	2342	NM_175398	Fam212b	1129.4	17.61	5.5	109050	6530418L21Rik|inka2
chr16	20673516	20673961	MACS_peak_73483	1127.27	445	ENSMUST00000115460	Eif4g1	1127.27	9.7	4.68	208643	E030015G23Rik|eIF-4-gamma 1|eIF-4G 1|eIF-4G1|eIF4GI
chr17	50509546	50509937	MACS_peak_84098	1126.26	391	NM_013880	Plcl2	1126.26	9.69	4.67	224860	PLC-L2|PRIP-2|Plce2|mKIAA1092
chr18	43392989	43393377	MACS_peak_89407	1125.4	388	NM_009468	Dpysl3	1125.4	9.92	5.48	22240	CRMP-4|DRP-3|TUC4|ULIP-1|Ulip|Ulip1
chr8	84726388	84726844	MACS_peak_185410	1125.3	456	ENSMUST00000098571	G430095P16Rik	1125.3	7.31	4.66	619292	-
chr3	90225508	90225911	MACS_peak_121725	1124.18	403	NM_026677	Rab13	1124.18	13.68	4.66	68328	0610007N03Rik|B230212B15Rik
chr2	92388974	92389280	MACS_peak_107662	1123.75	306	NM_011162	Mapk8ip1	1123.75	13.95	4.71	19099	IB1|JIP-1|Jip1|Prkm8ip|Skip|mjip-2a
chr5	66998646	66999388	MACS_peak_145503	1120.46	742	uc008xpk.1	Limch1	1120.46	7.64	4.75	77569	3732412D22Rik|mKIAA1102
chr3	89773608	89774038	MACS_peak_121650	1119.97	430	NM_027315	Ube2q1	1119.97	14.98	4.75	70093	1110002C01Rik|2310012M18Rik|AI854014|Gtap|NICE-5|PRO3094|Ube2q
chr15	99422079	99422908	MACS_peak_70545	1119.26	829	NM_001001884	Nckap5l	1119.26	16.63	4.74	380969	C230021P08Rik|Cep169
chr18	32079670	32080577	MACS_peak_81034	1118.94	907	NM_173441	Iws1	1118.94	10.9	8.38	73473	1700069O15Rik|3000008H23|AL117927|AW214353
chr14	67072089	67072471	MACS_peak_54108	1118.68	382	NM_028032	Ppp2r2a	1118.68	6.1	8.37	71978	2410004D02Rik|mKIAA1541
chr3	96184638	96185607	MACS_peak_120019	1116.58	969	NM_022030	Sv2a	1116.58	10.66	5.45	64051	AI746429|mKIAA0736
chrX	71555916	71556237	MACS_peak_184153	1114.42	321	NM_001293623	Hmgb3	1114.42	12.46	8.33	15354	Hmg2a|Hmg4
chr1	152089931	152090320	MACS_peak_9704	1114.38	389	NM_197990	1700025G04Rik	1114.38	19.55	5.44	69399	2610510E02Rik|2900042O04Rik|ENSMUSG00000073540
chr15	98862775	98864209	MACS_peak_63899	1114.18	1434	NM_001033276	Kmt2d	1114.18	6.18	8.32	381022	ALR|BC032281|BC058659|C430014K11Rik|KMT2B|Mll2|Mll4
chrX	136667510	136668378	MACS_peak_186076	1111.72	868	ENSMUST00000060904	Tceal3	1111.72	8.2	8.3	594844	1100001D19Rik
chr2	52857859	52858259	MACS_peak_104894	1109.3	400	ENSMUST00000090952	Fmnl2	1109.3	12.12	4.7	71409	5430425K04Rik|Man
chr4	123735550	123736864	MACS_peak_122039	1107.66	1314	NM_023423	Akirin1	1107.66	21.62	8.25	68050	6330407G11Rik
chr6	55677869	55679671	MACS_peak_155738	1105.5	1802	NM_009717	Neurod6	1105.5	20.03	5.42	11922	Atoh2|Math-2|Math2|Nex|Nex1m|bHLHa2
chr10	105573666	105574479	MACS_peak_22055	1104.74	813	NM_177368	Tmtc2	1104.74	21.69	4.68	278279	8430438D04Rik|D330034A10Rik
chr15	76656359	76656920	MACS_peak_61286	1103.09	561	ENSMUST00000176274	Cyhr1	1103.09	15.44	8.21	54151	1110031M01Rik|AU042374|Chrp
chr10	128310170	128310513	MACS_peak_23974	1099.31	343	NM_133992	Pan2	1099.31	32.06	5.4	103135	1200014O24Rik|AI047843|AW742773|Usp52|mKIAA0710
chr2	131177288	131180012	MACS_peak_109049	1098.92	2724	NM_007682	Cenpb	1098.92	9.78	5.39	12616	CENP-B
chr8	12757013	12757352	MACS_peak_179688	1097.94	339	ENSMUST00000033818	Atp11a	1097.94	24.25	4.69	50770	4930558F19Rik|AU040868|Atpc1h|Ih
chr18	73572860	73573776	MACS_peak_91604	1097.14	916	NM_001039214	Mex3c	1097.14	7.73	5.38	240396	A130001D14Rik|BC035207|BM-013|Rkhd2
chr6	72788709	72789254	MACS_peak_159681	1097	545	ENSMUST00000069536	Tcf7l1	1097	17.94	4.68	21415	Tcf-3|Tcf3|bHLHb21
chr7	101998299	102001659	MACS_peak_174412	1095.43	3360	NM_133947	Numa1	1095.43	4.92	4.67	101706	6720401E04Rik|AA764025|AL022610|AU014979|NuMA
chrX	20617502	20618082	MACS_peak_202677	1094.68	580	NM_001167775	Rbm10	1094.68	17.19	4.72	236732	E430039K10Rik
chr8	40510652	40511304	MACS_peak_182047	1094.22	652	uc009lmq.2	Cnot7	1094.22	13.16	4.72	18983	AU022737|CAF-1|Caf1|Pop2
chr3	9004404	9004723	MACS_peak_116600	1093.97	319	ENSMUST00000120143	Tpd52	1093.97	18.15	4.71	21985	AI043038|mD52
chr9	121297533	121297833	MACS_peak_201579	1092.31	300	uc009sda.1	Trak1	1092.31	18.54	4.7	67095	2310001H13Rik|AI413908|AI467545|hyrt|mKIAA1042
chr9	108487475	108487848	MACS_peak_180853	1090.59	373	NM_008483	Lamb2	1090.59	8.48	8.13	16779	AW211941|Lamb-2|Lams|npht
chr7	73939118	73941184	MACS_peak_171631	1088.56	2066	ENSMUST00000026896	St8sia2	1088.56	7.11	4.68	20450	AI323367|ST8SiaII|STX|Siat8b
chr9	56635074	56635628	MACS_peak_195173	1088.47	554	ENSMUST00000114256	Lingo1	1088.47	12.1	4.68	235402	4930471K13Rik|AV148400|LERN1|LINGO-1|Lrrn6a|UNQ201
chr15	95790378	95791484	MACS_peak_70053	1088.24	1106	ENSMUST00000180649	A130051J06Rik	1088.24	21.86	4.67	791370	ENSMUSG00000053098
chr5	124490122	124491124	MACS_peak_148134	1087.98	1002	ENSMUST00000031349	Snrnp35	1087.98	15.15	5.39	76167	6330548G22Rik
chr10	120977783	120979332	MACS_peak_23250	1086.12	1549	ENSMUST00000119093	Lemd3	1086.12	11.18	4.66	380664	AI316861|Man1
chr11	120110065	120110536	MACS_peak_36143	1086.08	471	NM_024249	Slc38a10	1086.08	10.74	5.44	72055	1810073N04Rik
chrX	103185135	103186503	MACS_peak_185382	1084.48	1368	NM_008671	Nap1l2	1084.48	17.3	8.09	17954	Bpx
chr19	6363689	6364118	MACS_peak_95187	1083.54	429	NM_011750	Sf1	1083.54	16.44	4.64	22668	BBP|MZFM|WBP4|Zfp162
chr19	47014697	47015819	MACS_peak_98782	1081.15	1122	NM_146100	Ina	1081.15	5.04	4.62	226180	AV028420|NF-66|NF66
chr8	84028305	84030177	MACS_peak_185227	1079.52	1872	NM_028877	Palm3	1079.52	12.59	4.66	74337	4432412L15Rik|AL024300
chr17	80727793	80728093	MACS_peak_86342	1078.99	300	uc008drk.1	Map4k3	1078.99	13.74	4.65	225028	4833416M01Rik|4833416M07Rik|9530052P13Rik|Glk|MAPKKKK3|MEKKK 3|MEKKK3|RAB8IPL1
chr1	87213938	87214495	MACS_peak_5945	1078.65	557	NM_001039169	Eif4e2	1078.65	10.23	5.46	26987	2700069E09Rik|AI036339|AV129531|D0H0S6743E|Eif4el3
chr5	104459449	104460225	MACS_peak_145167	1075.99	776	ENSMUST00000086831	Pkd2	1075.99	11.83	5.44	18764	C030034P18Rik|PC2|TRPP2
chr15	76171076	76178385	MACS_peak_67348	1075.74	7309	NM_011117	Plec	1075.74	12.77	4.64	18810	AA591047|AU042537|EBS1|PCN|PLTN|Plec1
chr5	110379268	110379593	MACS_peak_148626	1074.48	325	NM_028596	Fbrsl1	1074.48	11.18	4.68	381668	2410025L10Rik|AI467568|Gm1049|Gm29766|mKIAA1545
chr7	45813008	45813878	MACS_peak_169387	1074.14	870	uc009gxg.1	Cyth2	1074.14	9.6	4.67	19158	ARNO|CLM2|Pscd2
chr11	70393761	70395192	MACS_peak_29622	1072.93	1431	NM_029231	Pelp1	1072.93	16.47	5.43	75273	4930563C04Rik|MNAR
chr9	30942561	30943601	MACS_peak_188165	1070.85	1040	ENSMUST00000068135	Adamts8	1070.85	22.5	5.48	30806	METH-2|METH2
chr7	79464603	79465371	MACS_peak_168562	1069.96	768	NM_017462	Polg	1069.96	13.55	5.47	18975	AA409516|PolgA
chr9	60869574	60872283	MACS_peak_195762	1069.72	2709	NM_028283	Uaca	1069.72	7.88	4.66	72565	2700059D02Rik|nucling
chr10	108332687	108333311	MACS_peak_22229	1069.44	624	NM_054056	Pawr	1069.44	11.36	4.65	114774	2310001G03Rik|PAR4|Par-4
chr18	70568188	70568967	MACS_peak_84144	1067.45	779	ENSMUST00000074058	Mbd2	1067.45	12.29	7.95	17191	MBD2a
chr12	3865984	3866450	MACS_peak_33782	1067.4	466	uc007mxa.2	Dnmt3a	1067.4	7.56	7.94	13435	MmuIIIA
chr11	58009063	58009547	MACS_peak_28362	1066.69	484	NM_028451	Larp1	1066.69	18.89	4.64	73158	1810024J12Rik|3110040D16Rik|Larp|mKIAA0731
chr15	30646768	30647324	MACS_peak_58437	1065.62	556	NM_008729	Ctnnd2	1065.62	9.2	7.93	18163	Catnd2|Nprap|neurojugin
chrX	104200632	104201185	MACS_peak_205452	1064.83	553	ENSMUST00000118314	C77370	1064.83	11.58	4.64	245555	A230051P11|C77386|Kiaa2022|Xpn|mKIAA2022
chr7	36769533	36771123	MACS_peak_168731	1064.67	1590	NM_172298	Tshz3	1064.67	15.89	4.64	243931	A630038G13Rik|Tsh3|Zfp537|mKIAA1474|teashirt3
chr7	141636282	141639874	MACS_peak_178340	1063.04	3592	ENSMUST00000062451	Muc6	1063.04	12.59	4.67	353328	-
chr4	150248485	150248879	MACS_peak_139275	1062.43	394	ENSMUST00000080926	Eno1	1062.43	8.06	4.67	13806	0610008I15|AL022784|Eno-1|MBP-1
chr7	127746774	127747137	MACS_peak_177015	1062.23	363	NM_172748	Fbxl19	1062.23	18.57	4.67	233902	6030430O11|BC059812|Fbl19
chr19	5118121	5118560	MACS_peak_93355	1060.67	439	ENSMUST00000116563	Klc2	1060.67	20.56	5.52	16594	8030455F02Rik|AW212649|KLC 2|KLC-2
chr7	127557967	127561079	MACS_peak_160068	1055.06	3112	NM_001304266	Srcap	1055.06	6.53	8	100043597	B930091H02Rik|D030022P06Rik|F630004O05Rik
chr13	94285219	94285734	MACS_peak_52459	1053.9	515	ENSMUST00000022197	Scamp1	1053.9	14.12	4.79	107767	4930505M11Rik|AI415563|AW122395
chr1	156558785	156559205	MACS_peak_10241	1053.18	420	ENSMUST00000173929	Abl2	1053.18	17.57	5.54	11352	AA536808|Abll|Arg
chr1	180332111	180334230	MACS_peak_12557	1051.07	2119	NM_001081175	Itpkb	1051.07	18.67	4.77	320404	1110033J02Rik|E130307H12Rik
chr18	20673630	20674166	MACS_peak_87141	1049.46	536	NM_013697	Ttr	1049.46	13.71	5.52	22139	AA408768|AI787086|D17860|prealbumin
chr8	123859094	123859530	MACS_peak_189337	1049.02	436	uc009nwp.1	Ccsap	1049.02	20.94	4.76	73420	1700054N08Rik|AI853424
chr2	155990215	155992774	MACS_peak_111282	1048.96	2559	NM_008383	Cep250	1048.96	6.05	5.51	16328	AW490617|B230210E21Rik|Cep2|Inmp
chr6	90659597	90662955	MACS_peak_161190	1044.63	3358	NM_001134384	Iqsec1	1044.63	15.42	4.74	232227	AW561907|BC026481|BRAG2|D6Ertd349e|cI-43
chr14	118233621	118237030	MACS_peak_62045	1044.02	3409	NM_177753	Sox21	1044.02	13.3	4.74	223227	Sox25
chr11	102393402	102393782	MACS_peak_33893	1041.19	380	NM_016759	Rundc3a	1041.19	10.54	4.72	51799	RPIP-8|Rap2ip|Rpip8
chr3	90008056	90008361	MACS_peak_121687	1040.09	305	uc008qar.1	Ubap2l	1040.09	22.08	4.72	74383	3110083O19Rik|4932431F02Rik|A430103N23Rik|C77168|Nice-4|mKIAA0144
chr7	44854591	44855421	MACS_peak_165790	1038.47	830	NM_026270	Akt1s1	1038.47	13.73	5.47	67605	1110012J22Rik|AI227026|Lobe|Lobel|PRAS40
chr9	43803471	43807419	MACS_peak_175021	1037.84	3948	NM_021424	Pvrl1	1037.84	13.45	7.99	NA	NA
chrX	108743084	108743770	MACS_peak_201085	1037.7	686	NM_001081477	Brwd3	1037.7	20.05	5.47	382236	Brodl|D030064D06Rik|Gm596
chr4	83485716	83486200	MACS_peak_131673	1035.65	484	uc008tla.1	Psip1	1035.65	8.5	4.7	101739	AA408851|AU015605|Dfs70|Ledgfa|Ledgfb|Psip2
chr2	37358945	37359253	MACS_peak_102186	1032.35	308	ENSMUST00000112940	Pdcl	1032.35	15.57	5.43	67466	1200011E13Rik|AW108059|PhLP1
chr6	22875501	22875884	MACS_peak_155826	1031.76	383	NM_001081306	Ptprz1	1031.76	9.88	4.68	19283	AI850339|DSD-1-PG|PTPbeta|PTPzeta|Ptprz|Ptpz|R-PTP-zeta|RPTPz|Rptpbeta
chr16	31663908	31664321	MACS_peak_74274	1029.17	413	ENSMUST00000115201	Dlg1	1029.17	19.69	4.67	13383	B130052P05Rik|Dlgh1|E-dlg/SAP97|SAP-97|SAP97|mKIAA4187
chr2	3304811	3305413	MACS_peak_100082	1028.75	602	uc008idp.1	Nmt2	1028.75	17.69	4.67	18108	A930001K02Rik|AI605445|AU044698|hNMT-2
chr5	122284364	122284909	MACS_peak_147653	1028.6	545	ENSMUST00000053426	Pptc7	1028.6	19.71	5.42	320717	9130017A15Rik|AA672638|AI848390|TA-PP2C
chr7	127587876	127588595	MACS_peak_176983	1027.05	719	NM_001033040	Gm166	1027.05	17.59	4.66	NA	NA
chr6	37299562	37300067	MACS_peak_157271	1024.18	505	ENSMUST00000090314	Dgki	1024.18	11.68	4.65	320127	C130010K08Rik
chr4	82504730	82505779	MACS_peak_131582	1023.9	1049	NM_008687	Nfib	1023.9	11.86	4.65	18028	6720429L07Rik|CTF|E030026I10Rik|NF-I/B|NF1-B|NFI-B
chr8	105617315	105618725	MACS_peak_168998	1022.57	1410	NM_001081241	Fam65a	1022.57	11.82	7.96	75687	2310066E14Rik|AI837433
chr15	57821031	57823751	MACS_peak_65037	1021.45	2720	NM_199449	Zhx2	1021.45	13.45	5.44	387609	Afr-1|Afr1|Raf|mKIAA0854
chr16	55903124	55903653	MACS_peak_69382	1020.8	529	NM_028815	Cep97	1020.8	27.49	8.02	74201	2810403B08Rik|4932439K18Rik|AA437768|E130116N02Rik|Lrriq2
chr5	88886817	88887324	MACS_peak_143950	1019.8	507	ENSMUST00000148750	Slc4a4	1019.8	7.22	5.44	54403	AI835705|NBC|NBC1
chr6	66896548	66896989	MACS_peak_144001	1015.53	441	ENSMUST00000114222	Gng12	1015.53	15.88	7.98	14701	2010305F15Rik|AA536815|AI115529|AI314170|AI842738
chr1	60409618	60409919	MACS_peak_3826	1013.99	301	NM_198127	Abi2	1013.99	8.02	5.41	329165	8430425M24Rik|AI839867|C130078H13
chrX	101254527	101255273	MACS_peak_185207	1012.21	746	NM_018789	Foxo4	1012.21	29.16	7.96	54601	Afxh|Mllt7|afx
chr9	108139186	108139595	MACS_peak_200158	1011.22	409	NM_007567	Bsn	1011.22	15.57	4.66	12217	-
chr3	101604402	101604707	MACS_peak_120514	1010.77	305	NM_144900	Atp1a1	1010.77	9.57	5.37	11928	Atpa-1|BC010319
chr6	83117022	83118898	MACS_peak_160156	1010.72	1876	NM_020619	Mogs	1010.72	17.93	4.65	57377	1810017N02Rik|AI181835|Gcs1
chr18	74216130	74216482	MACS_peak_84451	1009.88	352	ENSMUST00000025444	Cxxc1	1009.88	18.94	7.93	74322	2410002I16Rik|5830420C16Rik|AI426635|Cfp1|Cgbp|PHF18
chrX	136732941	136734501	MACS_peak_201576	1008.26	1560	ENSMUST00000033797	Morf4l2	1008.26	9.31	5.36	56397	2410017O14Rik|Mrgx|Sid393p|mKIAA0026
chr11	5098925	5099566	MACS_peak_24544	1008.25	641	ENSMUST00000101610	Rhbdd3	1008.25	33.57	4.7	279766	Ptag
chr3	95495321	95496198	MACS_peak_122073	1005.4	877	NM_009709	Arnt	1005.4	17.22	4.69	11863	D3Ertd557e|Drnt|ESTM42|Hif1b|W08714|bHLHe2|mKIAA4051
chr1	128244180	128244552	MACS_peak_8296	1005.35	372	NM_026390	Ubxn4	1005.35	12.95	4.69	67812	1300013G12Rik|Ubxd2|mKIAA0242
chr10	119454033	119454422	MACS_peak_22960	1004.27	389	NM_133442	Grip1	1004.27	13.9	4.73	74053	4931400F03Rik|GRIP|eb
chr4	128773310	128774637	MACS_peak_136118	1004.18	1327	NM_001081098	Zfp362	1004.18	6.71	4.73	230761	-
chr2	49451485	49451958	MACS_peak_102914	1004.04	473	NM_172663	Epc2	1004.04	17.14	5.33	227867	5830499L14|D2Ertd694e
chr14	77251800	77252327	MACS_peak_54836	1003.54	527	ENSMUST00000099431	Gm10132	1003.54	10.37	8.01	100043755	ENSMUSG00000063556
chr12	41485570	41486057	MACS_peak_35967	997.44	487	NM_010733	Lrrn3	997.44	17.79	7.97	16981	NLRR-3
chr5	111417441	111421883	MACS_peak_148885	996.74	4442	ENSMUST00000094463	Mn1	996.74	8.73	4.74	433938	AA003644|AA009236
chr4	154019630	154021513	MACS_peak_139863	993.3	1883	ENSMUST00000169622	Lrrc47	993.3	18.58	4.72	72946	2900010D03Rik|AA960559|mKIAA1185
chr1	171357787	171358320	MACS_peak_11734	993.02	533	ENSMUST00000006579	Pfdn2	993.02	21.59	4.72	18637	ESTM27|W48336
chr19	10869538	10869906	MACS_peak_86699	989.54	368	ENSMUST00000025645	Tmem132a	989.54	11.14	7.9	98170	6720481D13Rik|Hspa5bp1|Orai1|R74613
chr11	77045654	77046754	MACS_peak_30459	988.3	1100	NM_001012309	Ccdc55	988.3	9.67	5.3	NA	NA
chr1	187225502	187226219	MACS_peak_13124	986.37	717	NM_026367	Gpatch2	986.37	13.8	5.3	67769	5830433G22Rik|5830436K05Rik|AI427714|AI447508|AW107440|AW491060|Gpatc2
chr9	62419491	62421413	MACS_peak_195870	984.87	1922	NM_175484	Coro2b	984.87	7.23	4.68	235431	CLIPINC|E130012P22Rik
chr7	126948270	126949159	MACS_peak_159987	981.62	889	uc009jtn.1	Asphd1	981.62	24.85	7.84	233879	A830007L07Rik|Gm168
chr1	36807883	36808476	MACS_peak_2042	981.54	593	NM_018872	Tmem131	981.54	12.6	4.67	56030	2610524E03Rik|CC28|D1Bwg0491e|Neg|RW1|YR-23|mKIAA0257
chr9	27029398	27030094	MACS_peak_191689	975.63	696	NM_178027	Vps26b	975.63	15.17	4.63	69091	1810012I05Rik|2310075A12Rik|AI848392
chr7	29180276	29180659	MACS_peak_164810	975.07	383	NM_026545	Psmd8	975.07	9.28	5.34	57296	6720456J22Rik|AA407360|AL033291|AL033322|AL033323|C76433
chr18	36560602	36561055	MACS_peak_88642	972.91	453	NM_175375	Ankhd1	972.91	22.83	5.34	108857	1110004O12Rik|4933432B13Rik|9130019P20Rik|A530027J04Rik|A630021B20Rik|AA571404|Mask|mFLJ00246|mKIAA1085
chr3	144569733	144570216	MACS_peak_125481	970.25	483	NM_011828	Hs2st1	970.25	15.97	4.62	23908	AW214369|Hs2st|mKIAA0448
chr4	41135742	41136246	MACS_peak_126202	968.97	504	ENSMUST00000040008	Ube2r2	968.97	7.35	5.31	67615	1200003M11Rik|Cdc34b|Ubc3b
chr8	83608179	83608542	MACS_peak_181307	966.54	363	NM_018808	Dnajb1	966.54	15.26	5.29	81489	0610007I11Rik|DjB1|HSPF1|Hdj1|Hsp40
chr14	79767295	79771312	MACS_peak_60771	964.39	4017	uc029smd.1	Pcdh8	964.39	9.15	4.58	18530	1700080P15Rik|Papc
chr7	127784847	127785736	MACS_peak_177028	963.17	889	NM_178029	Setd1a	963.17	12.09	4.58	233904	BC010250|KMT2F|Nsccn1|mKIAA0339|mNSC1
chr4	127194561	127195713	MACS_peak_135766	963.03	1152	NM_198618	Dlgap3	963.03	10.65	4.62	242667	BC058433|DAP-3|DAP3|Prpl8|Sapap3
chr11	102294948	102295312	MACS_peak_33536	960.43	364	ENSMUST00000107134	Atxn7l3	960.43	16.06	5.26	217218	E030022H21Rik
chr8	10153922	10154246	MACS_peak_175541	960.29	324	NM_001081397	Myo16	960.29	24.41	5.25	244281	BM140241|C230040D10Rik|Gm1105|NYAP3|mKIAA0865
chr11	94557101	94558357	MACS_peak_32810	959.52	1256	NM_153807	Acsf2	959.52	11.55	4.64	264895	-
chr13	107889396	107890064	MACS_peak_48474	958.56	668	uc007ruq.2	Zswim6	958.56	22.43	7.72	67263	2900036G02Rik|mKIAA1577
chr13	97135094	97135444	MACS_peak_47792	958.43	350	uc007rnt.2	Nsa2	958.43	4.95	7.71	59050	5730427N09Rik|LNR42|Nsa2p|Tinp1|Yr29
chr8	70912905	70914994	MACS_peak_184101	957.74	2089	NM_173013	Map1s	957.74	10.39	4.64	270058	6430517J16Rik|Bpy2ip1|Map8|Mtap1s|VCY2IP1
chr1	60488290	60490321	MACS_peak_3784	954.86	2031	NM_001045513	Raph1	954.86	8.07	4.67	77300	9430025M21Rik|C730009O10Rik|Lpd
chr16	16983381	16983739	MACS_peak_72960	953.18	358	NM_011949	Mapk1	953.18	10.37	4.66	26413	9030612K14Rik|AA407128|AU018647|C78273|ERK|Erk2|MAPK2|PRKM2|Prkm1|p41mapk|p42mapk
chr11	120762793	120764391	MACS_peak_36899	950.73	1598	ENSMUST00000105046	Hmga1-rs1	950.73	29.18	4.66	111241	ENSMUSG00000041059|Hmgi-rs1
chr11	3976193	3976778	MACS_peak_24250	945.01	585	ENSMUST00000042344	4930556J24Rik	945.01	9.38	5.33	75342	-
chr1	155932788	155933450	MACS_peak_10179	944.03	662	NM_001039184	Cep350	944.03	16.41	5.32	74081	4933409L06Rik|6430546F08Rik
chrX	99466321	99468600	MACS_peak_205045	943.9	2279	NM_001290555	Pja1	943.9	6.49	4.68	18744	praja-1
chr12	108274337	108275411	MACS_peak_44512	942.98	1074	NM_001159910	Ccdc85c	942.98	14.31	5.31	668158	EG668158|Gm265|Gm9010
chr12	113071537	113072887	MACS_peak_41661	942.96	1350	NM_001081170	Pacs2	942.96	15.36	7.77	217893	6720425G15Rik|AW208651|AW489976|E230011J22|Pacs1l|mKIAA0602
chr6	145815052	145815942	MACS_peak_149881	941.98	890	NM_027760	Rassf8	941.98	11.17	7.83	71323	5133400D11Rik|AA815821|AW123240|Hoj1|mHoj-1
chr6	117716472	117717438	MACS_peak_163370	940.71	966	ENSMUST00000101030	Gm7292	940.71	7.94	4.71	640370	EG640370
chr15	79418083	79419187	MACS_peak_67938	940.48	1104	NM_013767	Csnk1e	940.48	8.98	4.7	27373	AI426939|AI551861|AW457082|CK1epsilon|CKIe|KC1epsilon|tau
chr10	84440114	84440597	MACS_peak_20596	939.75	483	ENSMUST00000020220	Nuak1	939.75	12.6	4.69	77976	AU014801|AW494241|B230104P22Rik|Omphk1
chr19	11965843	11966296	MACS_peak_95819	939.57	453	NM_001033174	Osbp	939.57	21.2	4.69	76303	1110018F06Rik|AW559088|mKIAA4220
chr1	172082528	172082949	MACS_peak_11771	939.27	421	NM_009938	Copa	939.27	15.07	4.69	12847	AU040324|xenin
chr7	117380978	117381520	MACS_peak_175845	938.86	542	NM_175645	Xylt1	938.86	12.99	4.69	233781	8030490L12
chr19	53909111	53909414	MACS_peak_99228	938.57	303	NM_011050	Pdcd4	938.57	7.76	4.69	18569	D19Ucla1|Ma3|Tis
chr16	36911896	36917000	MACS_peak_73845	938.17	5104	NM_030035	Golgb1	938.17	9.32	5.32	224139	4930428L02Rik|628101|6330407A06Rik|AU042952|C130074L01Rik|F730017E11Rik|Gm6840|mKIAA4151
chr2	118745757	118746893	MACS_peak_107545	938.03	1136	NM_001301269	Inafm2	938.03	8.24	5.32	100043272	5430417L22Rik|ENSMUSG00000074918
chr15	84105430	84105754	MACS_peak_68812	937.46	324	NM_013873	Sult4a1	937.46	20.17	4.68	29859	2400007A17Rik|AI853543|BR-STL-1|ST4A1|Sultx3
chr18	36797878	36798755	MACS_peak_88693	936.68	877	NM_025594	Zmat2	936.68	10.94	5.36	66492	2610510D14Rik|2900082I05Rik
chr5	93268313	93268759	MACS_peak_147267	936.3	446	ENSMUST00000121127	Ccng2	936.3	14.67	4.67	12452	-
chr6	38875798	38876179	MACS_peak_157530	935.91	381	NM_010433	Hipk2	935.91	13.24	4.66	15258	1110014O20Rik|B230339E18Rik|Stank
chr4	124751311	124751692	MACS_peak_132797	929.77	381	NM_008385	Inpp5b	929.77	18.15	5.4	16330	5PTase|AW260155|INPP5P
chrX	93288542	93289425	MACS_peak_200191	928.51	883	NM_007492	Arx	928.51	13.64	5.39	11878	-
chr9	21546893	21547230	MACS_peak_191275	928.28	337	NM_021531	Carm1	928.28	15.99	4.63	59035	Prmt4
chr5	4045897	4046941	MACS_peak_137694	927.08	1044	NM_194462	Akap9	927.08	10.91	5.37	100986	5730481H23Rik|AKAP-9|AKAP450|AW545847|C79026|G1-448-15|PRKA9|mKIAA0803|mei2-5|repro12
chrX	10176002	10176829	MACS_peak_197833	925.92	827	NM_001177950	Rpgr	925.92	16.58	5.37	19893	Rp3h
chr8	123527911	123528322	MACS_peak_185270	924.21	411	uc009nwj.1	Gas8	924.21	16.93	5.36	104346	Gas11
chr1	190170267	190170680	MACS_peak_12314	921.04	413	NM_008937	Prox1	921.04	25.32	8.05	19130	A230003G05Rik
chr12	108554719	108555213	MACS_peak_45343	919.37	494	NM_007965	Evl	919.37	8.71	4.58	14026	AI528774
chr11	80300911	80301271	MACS_peak_30997	917.88	360	NM_139228	Rhbdl3	917.88	26.89	5.41	246104	AI847581|Rhbdl4|Rhomr1|Vrho
chr15	55071846	55072152	MACS_peak_59811	916.94	306	NM_001081288	Taf2	916.94	19.03	8.06	319944	150kDa|4732460C16Rik|AI425886|CIF150|TAF2B|TAFII-150|TAFII150
chr9	44715313	44716665	MACS_peak_193788	916.83	1352	NM_153537	Phldb1	916.83	12.13	4.58	102693	AU041016|D330037A14Rik|Ll5a
chr5	43233462	43235088	MACS_peak_144121	916.43	1626	NM_175937	Cpeb2	916.43	7.77	4.62	231207	A630055H10Rik|Cpe-bp2
chr13	38345715	38346587	MACS_peak_48634	914.93	872	NM_007556	Bmp6	914.93	8.96	4.61	12161	D13Wsu115e|Vgr1
chr5	115731121	115731621	MACS_peak_149665	913.97	500	ENSMUST00000055408	Ccdc64	913.97	13.6	4.65	75665	2210403N09Rik|BICDR-1
chr5	137030965	137033351	MACS_peak_152936	913.92	2386	NM_001039385	Vgf	913.92	11.96	4.65	381677	Gm1052
chr2	71530956	71533981	MACS_peak_96384	913.64	3025	uc008kav.1	Dlx1	913.64	6.64	8.1	13390	Dlx|Dlx-1
chr7	141949750	141950179	MACS_peak_178353	913.44	429	NM_029426	Brsk2	913.44	33.23	4.64	75770	4833424K13Rik|SAD-A|SADA
chr12	86880948	86884814	MACS_peak_43371	911.94	3866	NM_145836	Irf2bpl	911.94	5.37	4.64	238330	6430527G18Rik|Eap1
chr11	69632970	69633398	MACS_peak_29743	911.81	428	NM_011814	Fxr2	911.81	9.91	4.64	23879	Fxr2h
chr10	80156364	80158368	MACS_peak_19805	910.61	2004	NM_021565	Midn	910.61	11.1	4.67	59090	3000003C15Rik
chr1	75550754	75551382	MACS_peak_5088	910.25	628	uc007bpw.2	Slc4a3	910.25	14.26	4.67	20536	A930038D23Rik|Ae3
chr6	124431136	124431732	MACS_peak_164177	909.4	596	NM_153508	Clstn3	909.4	12.04	4.7	232370	CSTN3|Cs3|Cst-3|mKIAA0726
chr14	34170654	34171168	MACS_peak_56180	908.8	514	ENSMUST00000104925	Rpl23a-ps3	908.8	5.07	5.4	100041163	Gm3174
chr5	34574041	34574344	MACS_peak_143398	908.26	303	ENSMUST00000114335	Add1	908.26	15.81	4.69	11518	AI256389
chr11	82764344	82765578	MACS_peak_31603	907.07	1234	NM_025884	Zfp830	907.07	13.35	4.69	66983	2410003C20Rik|AV301118|AW048207|Ccdc16|Omcg1|Znf830
chr2	59354202	59355208	MACS_peak_103547	907.04	1006	ENSMUST00000037903	Pkp4	907.04	13.37	5.39	227937	5031422I09Rik|9430019K17Rik|Armrp|p0071
chr12	108003085	108003602	MACS_peak_45215	906.01	517	ENSMUST00000066060	Bcl11b	906.01	13.79	4.68	58208	9130430L19Rik|AI604821|B630002E05Rik|BCL-11B|Ctip2|Rit1
chr6	129533191	129533536	MACS_peak_148884	905.08	345	NM_020590	Gabarapl1	905.08	9.3	8.08	57436	3110025G09Rik|9130422N19Rik|AI196471|Apg8l|Atg8l|GECI|MNCb-0091
chr2	92403698	92405291	MACS_peak_107668	904.92	1593	NM_009963	Cry2	904.92	19.39	4.68	12953	AV006279|D130054K12Rik
chr7	108934414	108934807	MACS_peak_174705	904.63	393	NM_025344	Eif3f	904.63	7.14	4.67	66085	0610037M02Rik|AA409853|Eif3s5
chr17	25830509	25831843	MACS_peak_80258	902.5	1334	NM_028101	Jmjd8	902.5	10.78	5.45	72106	2610003J06Rik
chr5	23778072	23778499	MACS_peak_139154	901.3	427	NM_178403	Pus7	901.3	12.94	5.44	78697	C330017I15Rik
chr6	120958240	120960038	MACS_peak_163944	901.01	1798	NM_001270475	Mical3	901.01	8.25	4.66	194401	C130040D16Rik|Mical-3|mKIAA1364
chr5	129501250	129502820	MACS_peak_151584	900.86	1570	uc008zsw.1	Sfswap	900.86	20.07	4.65	231769	1190005N23Rik|6330437E22Rik|AI197402|AW212079|SWAP|Sfrs8|Srsf8
chr2	29227577	29228221	MACS_peak_92828	899.66	644	NM_133500	Ntng2	899.66	14.31	8.23	171171	2610016D08Rik|Lmnt2
chr9	46211669	46212562	MACS_peak_175525	898.89	893	NM_027498	Sik3	898.89	9.34	8.22	70661	5730525O22Rik|9030204A07Rik|AI447252|AI846254|AI849445|Qsk|SIK-3|mKIAA0999
chr7	126489551	126489911	MACS_peak_176799	896.86	360	NM_001163713	Tufm	896.86	5.09	4.63	233870	2300002G02Rik|C76308|C76389|EF-TuMT|EFTU
chr8	26027571	26028738	MACS_peak_163815	896.03	1167	NM_207659	Hook3	896.03	17.35	8.2	320191	5830454D03Rik|AI317159|E330005F07Rik
chr2	174346241	174346744	MACS_peak_113475	895.11	503	ENSMUST00000087871	Gnas	895.11	4.12	5.47	14683	5530400H20Rik|A930027G11Rik|C130027O20Rik|GPSA|GSP|Galphas|Gnas1|Gnasxl|Gs-alpha|Gsa|Nesp|Nesp55|Nespl|Oed-Sml|Oedsml|P1|P2|P3|PHP1A|PHP1B|POH|SCG6
chr18	60712722	60713632	MACS_peak_91910	894	910	uc008fat.1	Ndst1	894	16.76	4.63	15531	1200015G06Rik|Hsst|NDST-1|b2b2230Clo
chr3	69126731	69127113	MACS_peak_120188	893.06	382	ENSMUST00000029353	Kpna4	893.06	17.83	4.62	16649	1110058D08Rik|IPOA3
chr1	169974628	169975356	MACS_peak_11517	892.73	728	NM_022563	Ddr2	892.73	17.1	4.61	18214	AW495251|Ntrkr3|tyro10
chr3	68494573	68495257	MACS_peak_118014	892.12	684	NM_001113419	Gm21949	892.12	9.39	5.49	100505386	Iqcj-schip1|Schip-1-iqcj|Schip1
chr11	88192596	88194140	MACS_peak_32312	891.61	1544	NM_198013	Cuedc1	891.61	10.83	4.6	103841	AI841487|C330016O16Rik
chr17	74338986	74339445	MACS_peak_85875	888.83	459	NM_016962	Spast	888.83	6.59	4.59	50850	Spg4|mKIAA1083
chr6	18433677	18435446	MACS_peak_155603	887.55	1769	uc009ban.1	Cttnbp2	887.55	9.04	4.66	30785	3010022N24Rik|4732477G22Rik|6430526E05|9130022E09Rik|AU040881|Cortbp2|ORF4|mKIAA1758
chr14	20721170	20721659	MACS_peak_55534	886.9	489	NM_027996	Zswim8	886.9	8.63	4.66	268721	2310021P13Rik|4832404P21Rik|Kiaa0913|mKIAA0913
chr9	44847403	44850054	MACS_peak_193828	885.64	2651	NM_001081049	Kmt2a	885.64	7.42	4.66	214162	6430520K01|ALL-1|All1|Cxxc7|HRX|HTRX1|Mll|Mll1|mKIAA4050
chr15	102089865	102090195	MACS_peak_70997	885.33	330	uc011zzw.1	Eif4b	885.33	6.8	4.66	75705	2310046H11Rik|AL024095|C85189|Eif4a2
chr11	120990934	120991333	MACS_peak_36946	884.89	399	NM_027874	Csnk1d	884.89	15.55	4.65	104318	1200006A05Rik|AA409348|D930010H05Rik
chr5	98185023	98187378	MACS_peak_133082	884.88	2355	NM_029947	Prdm8	884.88	12.11	8.13	77630	4930565F05Rik|PFM5
chr17	78200247	78201099	MACS_peak_85983	883.7	852	NM_015800	Crim1	883.7	11.7	4.64	50766	AU015004
chr4	119619934	119620348	MACS_peak_134803	882.61	414	NM_172699	Foxj3	882.61	19.59	4.63	230700	C330039G02Rik|Fhd6
chr3	145647065	145647968	MACS_peak_125530	882.54	903	NM_010516	Cyr61	882.54	6.25	4.63	16007	AI325051|CCN1|Igfbp10
chr15	89457134	89458370	MACS_peak_69528	881.71	1236	NM_021921	Mapk8ip2	881.71	8.52	4.62	60597	3230402N03Rik|AI847694|AW049958|IB2|Jip2|R75148
chr6	122323007	122323813	MACS_peak_160943	880.71	806	NM_007905	Phc1	880.71	10.26	5.46	13619	AW557034|Edr|Edr1|Mph1|Rae-28|rae28
chr4	41657497	41658152	MACS_peak_116184	879.37	655	NM_016673	Cntfr	879.37	12.12	8.3	12804	Cntfralpha
chr11	24163145	24165299	MACS_peak_25676	879.26	2154	NM_001242934	Bcl11a	879.26	14.8	4.61	14025	2810047E18Rik|BCL-11A|Ctip1|D930021L15Rik|Evi9|Evi9a|Evi9b|Evi9c|mKIAA1809
chr1	58902796	58904182	MACS_peak_3563	878.98	1386	NM_172406	Trak2	878.98	13.15	4.61	70827	2900022D04Rik|4733401O11Rik|AI480836|AW046271|Als2cr3|CALS-C|GRIF-1|GRIF1|OIP98|mKIAA0549
chr11	119272869	119273452	MACS_peak_36506	878.58	583	uc007mqh.2	Gaa	878.58	8.53	4.6	14387	E430018M07Rik
chr4	123664465	123664780	MACS_peak_135206	877.12	315	uc008upq.1	Macf1	877.12	22.8	4.59	11426	ABP620|Acf7|Aclp7|MACF|R74989|mKIAA0465
chr12	102757540	102758423	MACS_peak_44844	876.91	883	ENSMUST00000174651	Gm20604	876.91	14.02	4.59	100859931	AK010878-Moap1
chr9	20873541	20874252	MACS_peak_191081	876.25	711	NM_175687	A230050P20Rik	876.25	13.56	4.58	319278	RyDEN
chr4	155624882	155625654	MACS_peak_140223	876.08	772	uc008wec.1	Cdk11b	876.08	15.78	4.58	12537	AA989746|CDK11-p110|CDK11-p46|CDK11-p58|Cdc11b|Cdc2l1|Cdc2l2|Cdk11|p58
chr1	86045862	86046572	MACS_peak_5676	874.92	710	NM_001144992	2810459M11Rik	874.92	12.5	4.57	72792	-
chr4	148165964	148166424	MACS_peak_138919	873.76	460	ENSMUST00000047951	Fbxo2	873.76	10.7	4.56	230904	FBG1|FBX2|Fbs1|Fbs2|NFB42|Prpl4
chr11	97689785	97690358	MACS_peak_30245	872.71	573	NM_009545	Pcgf2	872.71	10.11	8.34	22658	Mel18|Rnf110|Zfp144|mel-18
chr13	24801656	24803509	MACS_peak_47902	872.41	1853	NM_024473	BC005537	872.41	8.11	4.55	79555	8030460C05Rik|C78201
chr11	117654812	117655331	MACS_peak_36080	872.08	519	ENSMUST00000106344	Tnrc6c	872.08	13.79	4.55	217351	9930033H14Rik|mKIAA1582
chr8	47990065	47990551	MACS_peak_182610	872.02	486	NM_133791	Wwc2	872.02	10.7	4.55	52357	5330431C14Rik|AU022508|C85457|D8Ertd594e
chr4	155847379	155847904	MACS_peak_140292	871.88	525	NM_010091	Dvl1	871.88	12.53	4.55	13542	Dvl|mKIAA4029
chr13	49341548	49341910	MACS_peak_49603	868.18	362	NM_029791	Bicd2	868.18	14.4	4.56	76895	-
chr2	163995034	163995365	MACS_peak_114234	866.47	331	ENSMUST00000018470	Ywhab	866.47	7.57	4.55	54401	1300003C17Rik
chr14	30518919	30519677	MACS_peak_56735	864.87	758	NM_133761	Dcp1a	864.87	13.26	4.54	75901	1110066A22Rik|4930568L04Rik|AU019772|D14Ertd817e|Mitc1|SMIF
chr5	115453825	115455698	MACS_peak_135027	864.17	1873	ENSMUST00000150779	Msi1	864.17	11.7	8.39	17690	Msi1h|Musahi1|m-Msi-1
chr11	53350766	53351129	MACS_peak_27834	863.76	363	NM_033565	Aff4	863.76	5.42	4.53	93736	AF5Q31|Alf4|Laf4l|MCEF
chr12	49382882	49386464	MACS_peak_39187	863.17	3582	NM_001160112	Foxg1	863.17	7.41	5.37	15228	2900064B05Rik|BF-1|Bf1|Hfh9|Hfhbf1
chr10	28465757	28466060	MACS_peak_15637	863.03	303	NM_008983	Ptprk	863.03	11.29	4.53	19272	AI853699|PTPk|RPTPkappa
chr15	61987421	61988278	MACS_peak_66328	862.88	857	uc007vyi.1	Myc	862.88	12.93	4.53	17869	AU016757|Myc2|Niard|Nird|bHLHe39
chrX	7375023	7375830	MACS_peak_202076	861.91	807	NM_019461	Usp27x	861.91	28.31	4.52	54651	Sfc11|Usp27
chr12	24660182	24660911	MACS_peak_38497	860.99	729	NM_178357	Klf11	860.99	27.35	4.52	194655	9830142A17|D12Ertd427e|Tieg2|Tieg2b|Tieg3
chr5	19907517	19908013	MACS_peak_138431	860.99	496	NM_015823	Magi2	860.99	15.35	5.4	50791	AIP-1|Acvri1|Acvrinp1|Acvrip1|Magi-2|S-SCAM|mKIAA0705
chr3	88502752	88503386	MACS_peak_121322	859.73	634	ENSMUST00000149068	Lmna	859.73	8.26	4.5	16905	Dhe
chr5	121220218	121220657	MACS_peak_150344	857.13	439	NM_181421	Gm15800	857.13	12.09	4.49	269700	A130010L24|AU042671|BC019639|EG545802|OTTMUSG00000026283|mKIAA0614
chr10	88503584	88504008	MACS_peak_21018	856.39	424	ENSMUST00000117440	Chpt1	856.39	16.96	4.49	212862	-
chr3	105004298	105006128	MACS_peak_120794	856.28	1830	NM_030249	Cttnbp2nl	856.28	11.73	5.42	80281	AA552995|AA589392|AU018624|BC003236|mKIAA1433
chr8	48555152	48555693	MACS_peak_178957	855.57	541	ENSMUST00000110346	Tenm3	855.57	25.4	5.41	23965	2610100B16Rik|Odz1|Odz3|Ten-m3|mKIAA1455
chr1	172026997	172027331	MACS_peak_11759	855.33	334	uc007dpi.1	Vangl2	855.33	22.83	5.41	93840	C530001F03Rik|Lootl|Lp|Lpp1|Ltap|Vang1l2|loop-tail|ska17|ska<m17Jus>|stbm|strabismus
chr6	38194383	38197089	MACS_peak_157379	854.72	2706	NM_194061	D630045J12Rik	854.72	8.98	4.48	330286	Kiaa1549|mKIAA1549
chr7	24503511	24504539	MACS_peak_167346	852.19	1028	ENSMUST00000068023	Cadm4	852.19	7.68	4.5	260299	Igdf4c|Igsf4c|Tsll2
chr12	84172753	84174423	MACS_peak_43003	851.69	1670	NM_001163501	Elmsan1	851.69	13.34	4.5	238317	9430029N19Rik|C130039O16Rik|Gm260
chr19	10182887	10183264	MACS_peak_95632	849.87	377	NM_146094	Fads1	849.87	12.51	4.49	76267	0710001O03Rik|A930006B21Rik|AI317215|DSD
chr3	126941609	126947807	MACS_peak_112258	849.56	6198	ENSMUST00000182112	Ank2	849.56	5.45	8.48	109676	100043364|AI835472|AW491075|Ank-2|Gm4392
chr3	57574822	57575257	MACS_peak_119549	845.17	435	NM_133784	Wwtr1	845.17	12.19	4.47	97064	2310058J06Rik|2610021I22Rik|C78399|Taz
chr2	91982341	91983007	MACS_peak_107572	842.04	666	NM_011957	Creb3l1	842.04	18.21	4.45	26427	Oasis
chr5	36483787	36484285	MACS_peak_143746	842.01	498	NM_001170454	Tada2b	842.01	18.41	4.45	231151	AA474455|Gm145
chr11	120271358	120273104	MACS_peak_36789	840.77	1746	NM_198423	Bahcc1	840.77	10.88	4.45	268515	B930044J06|BC060615
chr5	28338995	28339308	MACS_peak_139784	839.49	313	NM_028234	Rbm33	839.49	10.53	5.53	381626	3200001K10Rik|6430512A10Rik|AA386890|Prr8
chr12	99195908	99196813	MACS_peak_43524	838.91	905	NM_183186	Foxn3	838.91	13.57	5.52	71375	5430426H20Rik|AA589593|AW556347|Ches1|Ches1l|HTLFL1
chr8	122889638	122896156	MACS_peak_189112	836.72	6518	NM_001081379	Ankrd11	836.72	7.9	4.42	77087	2410104C19Rik|3010027A04Rik|6330578C09Rik|9530048I21Rik|AA930108|Gm176|Yod
chr4	44931035	44931545	MACS_peak_126875	836.58	510	NM_138590	Zcchc7	836.58	10.15	5.54	319885	4930572I07Rik|D4Wsu132e
chr12	55492299	55492647	MACS_peak_39870	836.39	348	NM_010907	Nfkbia	836.39	10.44	5.53	18035	AI462015|Nfkbi
chr3	105665456	105667589	MACS_peak_123204	834.57	2133	uc008qux.1	Kcnd3	834.57	28.38	4.41	56543	AW045978|Kncd3|Kv4.3
chr7	44490069	44490970	MACS_peak_169073	834.56	901	NM_197991	Emc10	834.56	9.76	4.41	69683	2310044H10Rik|5430410O10Rik|Inm02|Mirta22
chr19	5273973	5274527	MACS_peak_93385	831.35	554	NM_030109	Sf3b2	831.35	9.81	5.6	319322	145kDa|2610311M13Rik|2810441F20Rik|B230398H18Rik|SAP145|SF3b1|SF3b145|SF3b150
chr19	37174056	37174985	MACS_peak_95896	829.29	929	NM_198300	Cpeb3	829.29	9.13	5.59	208922	4831444O18Rik|CPE-BP3|mKIAA0940
chr11	94473375	94474198	MACS_peak_32804	824.95	823	NM_009783	Cacna1g	824.95	46.55	4.48	12291	Cav3.1d|[a]1G|a1G|alpha-1G|mKIAA1123
chr3	92080479	92082000	MACS_peak_121825	824.77	1521	NM_008508	Lor	824.77	11.36	4.48	16939	AI036317|S77319
chr5	111284991	111289709	MACS_peak_148868	823.39	4718	NM_001267622	Ttc28	823.39	7.15	4.55	209683	2310015L07Rik|6030435N04|AI428795|AI851761|BC002262|TPRBK
chr6	85340342	85342361	MACS_peak_160491	823.23	2019	NM_001003955	Rab11fip5	823.23	9.85	4.55	52055	9130206P09Rik|C75969|D6Ertd32e|GAF1|RIP11
chr10	58813358	58814126	MACS_peak_17603	823.11	768	NM_172788	Sh3rf3	823.11	11.43	4.54	237353	4831416G18Rik|Igfbp5-ip|Sh3md4|Sh3rf31
chr3	87174395	87174747	MACS_peak_119031	820.75	352	NM_130867	Kirrel	820.75	17.25	5.63	170643	6720469N11Rik|Kirrel1|Neph1
chr13	85288395	85289486	MACS_peak_52000	819.78	1091	NM_145452	Rasa1	819.78	7.95	4.64	218397	Gap|RasGAP|Rasa
chr2	167188056	167188818	MACS_peak_112896	818.75	762	NM_008420	Kcnb1	818.75	20.12	5.62	16500	Kcr1-1|Kv2.1|Shab
chr11	51756076	51756919	MACS_peak_27679	817.57	843	uc007iun.1	Sec24a	817.57	20.06	4.63	77371	-
chr12	83660594	83661463	MACS_peak_42174	816.93	869	uc007odl.1	Rbm25	816.93	9.47	5.61	67039	2600011C06Rik|2610015J01Rik|A130095G20Rik|AI159652|AL023075|AU043498|RNPC7
chr16	11253213	11254325	MACS_peak_72346	816.76	1112	uc007yfg.1	Gspt1	816.76	6.02	4.63	14852	AI314175|AI326449|AV307676|C79774|G1st|Gst-1
chr9	67049018	67049348	MACS_peak_196630	815.87	330	ENSMUST00000113707	Tpm1	815.87	8.72	4.63	22003	AA986836|AI854628|TM2|Tm3|Tmpa|Tpm-1|alpha-TM
chrX	103821354	103821988	MACS_peak_200864	814.56	634	NM_009197	Slc16a2	814.56	15.49	5.6	20502	AW105741|Mct8|Xpct
chr11	23333438	23333799	MACS_peak_25428	812.81	361	NM_001190401	Usp34	812.81	17.9	5.58	17847	A530081C03Rik|Murr2
chr15	89351120	89351887	MACS_peak_69511	812.67	767	NM_178919	Lmf2	812.67	10.05	4.61	105847	AI451006|Tmem112b|Tmem153
chr8	47287879	47289402	MACS_peak_182471	812.57	1523	NM_001114311	Stox2	812.57	9.75	4.61	71069	4933409N07Rik|AI449080|AI835114|mKIAA1392
chr3	133469275	133469767	MACS_peak_122497	812.05	492	uc008rkp.2	Tet2	812.05	11.7	5.58	214133	Ayu17-449|E130014J05Rik|mKIAA1546
chr3	90509190	90509498	MACS_peak_119613	811.61	308	NM_023215	Chtop	811.61	15.83	5.61	66511	2500003M10Rik|Fop|Srag
chr4	133338995	133339324	MACS_peak_134252	811.48	329	ENSMUST00000043305	Wdtc1	811.48	15.17	5.61	230796	Gm695|adipose|adp
chr2	167056150	167056941	MACS_peak_114751	810.65	791	NM_001033196	Znfx1	810.65	17.47	4.68	98999	AI481105|Astx3
chr6	71439997	71440599	MACS_peak_159414	810.63	602	NM_024288	Rmnd5a	810.63	13.72	4.68	68477	1110007A06Rik|AJ237586|AW125795|Gid2|MTA.D02.090
chrX	134692606	134696410	MACS_peak_185992	809.96	3804	NM_001202500	Armcx4	809.96	7.71	8.81	100503043	AI448196|Gm195
chr7	101898372	101899583	MACS_peak_174387	809.63	1211	ENSMUST00000106969	Tomt	809.63	18.05	4.67	791260	Comt2|F930017I19Rik
chr15	68928419	68928833	MACS_peak_66750	809.31	414	NM_010158	Khdrbs3	809.31	11.53	4.66	13992	Etle|SLM-2|Salp|Slm2|T-STAR
chr17	35899816	35900872	MACS_peak_83073	808.96	1056	ENSMUST00000141662	Atat1	808.96	8.01	4.66	73242	0610011P08Rik|2610008K08Rik|2610110G12Rik|3110080J08Rik|Mec17|TAT
chr4	129984869	129985307	MACS_peak_133756	808.09	438	NM_001290714	Adgrb2	808.09	16.51	5.58	230775	Bai2
chr13	52530419	52530836	MACS_peak_45225	807.61	417	NM_001024474	Diras2	807.61	22.9	8.78	68203	2900052J15Rik|AI414999
chr7	49452398	49453705	MACS_peak_169875	805.82	1307	uc009hbk.1	Nav2	805.82	6.23	4.64	78286	5330421F07Rik|AU067780|BQ960892|HELAD1|POMFIL2|RAINB1|RAINB2|Unc53H2|mKIAA3015
chr11	70606600	70607144	MACS_peak_29900	804.92	544	uc007jvn.1	Mink1	804.92	22.08	4.63	50932	B55|MINK|Map4k6|Ysk2
chr15	85577507	85578070	MACS_peak_69023	804.73	563	NM_001163634	Wnt7b	804.73	14.02	4.63	22422	Wnt-7b
chr15	22713819	22714834	MACS_peak_57959	802.58	1015	NM_001165971	Gm5803	802.58	11.51	8.72	545091	EG545091
chr8	87959195	87959595	MACS_peak_185839	801.26	400	NM_033327	Zfp423	801.26	14.28	4.61	94187	Ebfaz|Roaz|Zfp104|Znf423|ataxia1|mKIAA0760|nur12
chr3	135439166	135439798	MACS_peak_124876	801.13	632	uc008rlq.1	Ube2d3	801.13	8.11	4.61	66105	1100001F19Rik|9430029A22Rik|AA414951
chr2	158757137	158757502	MACS_peak_113688	799.76	365	uc008nqo.2	Ppp1r16b	799.76	25.04	4.6	228852	ANKRD4|C130078N17Rik|TIMAP|Wdt4
chr1	56971111	56972502	MACS_peak_3426	798.75	1391	ENSMUST00000042857	Satb2	798.75	10.56	4.59	212712	mKIAA1034
chr17	33939747	33940304	MACS_peak_81578	795.51	557	ENSMUST00000173363	H2-Ke2	795.51	12.65	5.5	NA	NA
chr17	33916904	33919325	MACS_peak_81572	794.91	2421	NM_020625	Zbtb22	794.91	8.37	5.49	81630	1110008J20Rik|AI265210|AI415166|Bing1|Zfp297
chr12	72303656	72304418	MACS_peak_41442	794.28	762	NM_153457	Rtn1	794.28	8.39	4.64	104001	Nsp
chr7	127022136	127023168	MACS_peak_173312	793.35	1032	NM_010772	Maz	793.35	11.14	5.48	17188	PUR1|Pur-1|SAF-1|SAF-2
chr9	50752887	50753477	MACS_peak_194657	791.24	590	ENSMUST00000034562	Cryab	791.24	8.51	4.69	12955	Crya-2|Crya2|HspB5|P23
chr19	8713341	8713897	MACS_peak_95493	790.08	556	NM_008577	Slc3a2	790.08	11.89	4.68	17254	4F2|4F2HC|AI314110|Cd98|Ly-10|Ly-m10|Ly10|Mdu1|Mgp-2hc|NACAE
chr12	109459606	109460712	MACS_peak_45469	789.4	1106	NM_010052	Dlk1	789.4	15.23	4.67	13386	AW742678|DLK-1|DlkI|FA1|Ly107|Peg9|SCP1|ZOG|pG2|pref-1
chr5	139970977	139974521	MACS_peak_153358	788.34	3544	NM_175522	Elfn1	788.34	12.58	4.67	243312	A930017N06Rik|AI197272|Ppp1r28
chr7	100928574	100932144	MACS_peak_174213	788.12	3570	NM_001081116	Arhgef17	788.12	11.3	4.66	207212	8030463K16|AI428794|AW558066|BC035332|mKIAA0337
chr6	131365104	131365405	MACS_peak_164677	787.12	301	NM_011733	Ybx3	787.12	9.86	4.7	56449	Csda|Dpba|MSY3|MSY4|Yb2|dbpA|oxyR
chr11	120780830	120781903	MACS_peak_36283	786.98	1073	NM_009053	Rfng	786.98	7.83	5.48	19719	-
chr17	46446161	46447717	MACS_peak_83582	785.56	1556	NM_001162864	Ttbk1	785.56	15.77	4.69	106763	AU017937|AW048023|C330008L01Rik
chr9	119322004	119322427	MACS_peak_201406	785.23	423	NM_133985	Oxsr1	785.23	22.64	4.69	108737	2210022N24Rik|2810422B09Rik|AI462649|AW209236|Osr1|mKIAA1101
chr10	45158231	45158900	MACS_peak_16939	785.08	669	NM_011156	Prep	785.08	11.18	4.68	19072	AI047692|AI450383|D10Wsu136e|PEP|Pop
chr15	76736455	76737809	MACS_peak_67499	784.66	1354	NM_198420	Arhgap39	784.66	12.82	4.68	223666	9530053N22|AI843066|D15Wsu169e|Kiaa1688|Porf-2
chr7	46396467	46398247	MACS_peak_169459	783.38	1780	NM_008421	Kcnc1	783.38	6.92	4.67	16502	C230009H10Rik|KShIIIB|KV4|Kcr2-1|Kv3.1|NGK2|Shaw
chr5	118155063	118155458	MACS_peak_150051	782.45	395	NM_172721	Fbxw8	782.45	11.45	4.66	231672	4930438M06Rik|FBW6|FBW8|FBXO29|Fbx29
chr14	54464146	54464611	MACS_peak_58357	781.55	465	NM_022993	Lrp10	781.55	19.66	4.66	65107	Lrp9
chr11	116852567	116853094	MACS_peak_35965	781.25	527	NM_011358	Srsf2	781.25	6.55	4.66	20382	D11Wsu175e|MRF-1|Pr264|SC35|Sfrs10|Sfrs2
chr19	47050450	47050845	MACS_peak_98787	781.2	395	NM_027654	Pcgf6	781.2	12.42	4.65	71041	4933407A11Rik|AI604840|MBLR|Rnf134
chr3	96727610	96727910	MACS_peak_122322	780.07	300	NM_026406	Rnf115	780.07	16.28	4.64	67845	2610028E05Rik|AU042696|Zfp364
chr11	102994067	102995172	MACS_peak_34007	779.91	1105	NM_026551	Dcakd	779.91	11.7	4.64	68087	3010024O21Rik|6720485C15Rik|AI849483
chr7	28049103	28049700	MACS_peak_151821	779.67	597	uc012fgo.1	Psmc4	779.67	9.65	8.81	23996	CIP21|MIP224
chr14	74947383	74947877	MACS_peak_60255	777.12	494	NM_001033439	Lrch1	777.12	18.08	4.66	380916	4832412D13Rik|AI552548|AW215503|Chdc1|mKIAA1016
chr17	35956818	35957589	MACS_peak_75353	777	771	NM_013854	Abcf1	777	15.23	8.82	224742	AU041969|Abc50|D17Wsu166e|GCN20
chr8	124793018	124794905	MACS_peak_171326	775.89	1887	NM_198632	Trim67	775.89	5.84	8.9	330863	D130049O21Rik|TNL
chr6	30747553	30748987	MACS_peak_156408	774.65	1434	NM_017478	Copg2	774.65	11.74	4.66	54160	AW227625|gamma-2-COP
chr7	90468193	90469161	MACS_peak_169516	774.24	968	ENSMUST00000032843	Tmem126b	774.24	20.88	5.58	68472	1110001A23Rik
chr11	60185095	60192025	MACS_peak_28658	773.69	6930	uc007jfl.1	Rai1	773.69	8.93	4.65	19377	Gt1
chr16	84954796	84955432	MACS_peak_77926	772.29	636	NM_007471	App	772.29	8.36	4.69	11820	Abeta|Abpp|Adap|Ag|Cvap|E030013M08Rik|betaApp
chr4	156237342	156237728	MACS_peak_140373	772.19	386	uc029vbi.1	Noc2l	772.19	10.87	4.68	57741	AA410003|AF155546|NIR
chr8	123332712	123333020	MACS_peak_185214	770.17	308	NM_172287	Spire2	770.17	23.3	5.6	234857	BC026502|Spir-2|Spir2
chr1	105663860	105664633	MACS_peak_7011	769.2	773	NM_029349	2310035C23Rik	769.2	17.63	4.71	227446	6430401N10|Kiaa1468|mKIAA1468
chr4	132553016	132553742	MACS_peak_136719	768.83	726	NM_172400	Dnajc8	768.83	11.34	4.7	68598	1110021D09Rik|2010009J04Rik|AL024084|AU019262|AU044514
chr15	79125066	79125674	MACS_peak_67869	768.25	608	uc007wsp.2	Micall1	768.25	12.55	4.7	27008	AI448246|D15Mit260|D15N2e|EST573322|EST820961|MIRab13|mKIAA1668
chr9	80066902	80067572	MACS_peak_197907	768.04	670	NM_146003	Senp6	768.04	10.86	4.7	215351	2810017C20Rik|E130319N12Rik|Susp1|mKIAA0797
chr3	104219644	104220406	MACS_peak_122998	767.51	762	NM_133853	Magi3	767.51	11.25	4.69	99470	4732496O19Rik|6530407C02Rik|AA407180|AI120132|mKIAA1634
chr17	46555327	46556162	MACS_peak_82335	767.09	835	NM_020493	Srf	767.09	9.04	5.69	20807	AW049942|AW240594
chrX	71117480	71119394	MACS_peak_203911	766.98	1914	NM_001081354	Mamld1	766.98	8.37	4.69	333639	G630014P10Rik
chr7	18957535	18965319	MACS_peak_166989	765.17	7784	NM_001029877	Nova2	765.17	17.64	4.69	384569	Gm1424
chr4	153432047	153432853	MACS_peak_126121	762.59	806	NM_001099299	Ajap1	762.59	19.82	9.01	230959	Gm573
chr5	137734839	137736354	MACS_peak_153043	761.5	1515	NM_175521	Nyap1	761.5	8	4.71	243300	6430598A04Rik
chr7	127016442	127020327	MACS_peak_176904	760.35	3885	ENSMUST00000032918	Pagr1a	760.35	12.71	4.7	67278	2900092E17Rik|C77040|PA1|PAGR1
chr13	93303756	93305302	MACS_peak_52357	759.88	1546	ENSMUST00000109494	Homer1	759.88	14.64	4.69	26556	PSD-Zip45|SYN47|Ves-1|homer-1|vesl-1
chr19	5456460	5457563	MACS_peak_94977	759.78	1103	NM_198616	Ccdc85b	759.78	8.89	4.69	240514	AI842788|BB115872
chr19	59300878	59301708	MACS_peak_99888	759.48	830	NM_001033222	Pdzd8	759.48	11.08	4.69	107368	A630041P07Rik|AV329468|AW228944|Pdzk8
chr3	129878605	129878935	MACS_peak_122313	759.07	330	NM_023196	Pla2g12a	759.07	18.61	5.7	66350	2310004B05Rik|GXII|GXII-1|GXII-1-PLA2|Pla2g12|Rossy|mGXII-1
chr3	84903500	84904079	MACS_peak_109246	758.69	579	NM_001177773	Fbxw7	758.69	10.65	9.13	50754	1110001A17Rik|AGO|Cdc4|Fbw7|Fbwd6|Fbx30|Fbxo30|Fbxw6|SEL-10
chr10	80798197	80798805	MACS_peak_19959	758.68	608	ENSMUST00000148665	Sf3a2	758.68	13.74	4.69	20222	66kDa|AW047242|PRP11|SFA66|Sap62
chr17	35681566	35682518	MACS_peak_83034	757.14	952	NM_007584	Ddr1	757.14	6.27	4.68	12305	6030432F18|AI323681|CD167a|Cak|Nep|PTK3A
chr11	119143042	119147816	MACS_peak_36457	754.52	4774	NM_172443	Tbc1d16	754.52	7.13	4.66	207592	B930087K01|BC026530|Tcd1d16
chr8	70768460	70769232	MACS_peak_180223	754.49	772	ENSMUST00000143785	Pik3r2	754.49	7.44	5.79	18709	p85beta
chr4	28813130	28813478	MACS_peak_115441	754.2	348	NM_010141	Epha7	754.2	14.19	9.15	13841	Cek11|Ebk|Ehk3|Hek11|Mdk1
chr2	29125064	29125549	MACS_peak_102517	753.77	485	NM_198033	Setx	753.77	14.14	4.65	269254	A130090N03|A930037J23Rik|AOA2|AW060766|Als4|SCAR1|Sen1|mKIAA0625
chr4	154340720	154342137	MACS_peak_139916	753.15	1417	NM_027504	Prdm16	753.15	12.72	4.65	70673	5730557K01Rik|csp1|mel1
chr14	24003747	24004205	MACS_peak_50599	753.11	458	NM_010610	Kcnma1	753.11	10.61	9.13	16531	5730414M22Rik|BKCa|MaxiK|Slo|Slo1|mSlo|mSlo1
chrX	57065645	57066847	MACS_peak_203622	752.81	1202	NM_028242	Htatsf1	752.81	9.37	4.65	72459	1600023H17Rik|2600017A12Rik|2700077B20Rik|TAT-SF1
chr4	123409563	123411911	MACS_peak_135143	752.51	2348	NM_001167918	D830031N03Rik	752.51	17.07	4.65	442834	Kiaa0754|mKIAA0754
chr1	87406807	87407201	MACS_peak_5882	752.26	394	uc007bwv.1	Gigyf2	752.26	8.25	4.65	227331	2610016F01Rik|A830080H02Rik|AI852361|AW259676|BC006835|Tnrc15|mKIAA0642
chrX	74366955	74367586	MACS_peak_204206	751.5	631	NM_145405	Ubl4	751.5	20.07	4.64	NA	NA
chr12	110666562	110666945	MACS_peak_45616	750.68	383	ENSMUST00000018851	Dync1h1	750.68	9.28	4.63	13424	9930018I23Rik|AI894280|DHC1|DHC1a|DNCL|Dnchc1|Dnec1|Dnecl|Loa|MAP1C|P22|Swl|mKIAA0325
chrX	56454838	56455316	MACS_peak_203569	746.8	478	NM_172779	Ddx26b	746.8	22.76	4.62	236790	4930535D10Rik|6330505F04Rik|D130066O12
chr5	149635969	149636338	MACS_peak_154527	746.77	369	ENSMUST00000074846	Hsph1	746.77	17.54	4.62	15505	105kDa|AI790491|Hsp105|Hsp110|hsp-E7I|hsp110/105
chrX	52164615	52165252	MACS_peak_203490	745.01	637	ENSMUST00000033450	Gpc4	745.01	6.15	4.64	14735	9530073D23Rik|AF311610|AI385680|AI661372|K-glypican
chr4	141015476	141015971	MACS_peak_124634	744.36	495	NM_008546	Mfap2	744.36	13.06	9.1	17150	AI893631|Magp|Magp1
chr10	81544791	81545190	MACS_peak_18555	743.69	399	ENSMUST00000043604	Gna11	743.69	6.65	9.1	14672	Dsk7|E430025L19
chr7	123000583	123002366	MACS_peak_172921	742.47	1783	NM_011247	Rbbp6	742.47	9.39	5.83	19647	4933422O15Rik|AI316869|BB233631|C030034J04Rik|C77662|P2P-R|PACT
chrX	147553677	147554081	MACS_peak_206564	739.19	404	NM_001081173	Lrch2	739.19	14.86	4.69	210297	AI316885|mKIAA1495
chr9	110547208	110548883	MACS_peak_200554	737.44	1675	NM_001081340	Setd2	737.44	11.11	4.68	235626	4921524K10Rik|BC031601|KMT3A
chr7	127342794	127344875	MACS_peak_176934	737.39	2081	NM_146202	Zfp768	737.39	9.92	4.67	233890	BC026432|Znf768
chr1	182019529	182019980	MACS_peak_12787	737.11	451	NM_008680	Enah	737.11	13.29	4.67	13800	Mena|NDPP-1|Ndpp1|WBP8
chr7	4145265	4146238	MACS_peak_166237	736.37	973	NM_172736	Leng8	736.37	6.85	4.66	232798	AW049671
chr7	24081896	24082238	MACS_peak_167279	736.02	342	NM_172483	Zfp180	736.02	29.79	4.66	210135	2310040I01Rik|AI852378|D130011P11|HHZ168
chr19	10948277	10949266	MACS_peak_95781	735.4	989	NM_023731	Ccdc86	735.4	7.61	4.66	108673	4933411H20Rik|6720480F16Rik|D19Ertd678e
chr1	164457760	164458355	MACS_peak_11126	735.28	595	NM_009721	Atp1b1	735.28	10.12	5.79	11931	Atp4b|Atpb|Atpb-1|NKbeta1
chr11	102436980	102438909	MACS_peak_33901	735.13	1929	NM_199200	Fam171a2	735.13	7.37	4.65	217219	-
chr11	30771725	30772224	MACS_peak_25897	734.89	499	ENSMUST00000041231	Psme4	734.89	11.47	5.78	103554	AA409398|AU041366|TEMO|mKIAA0077
chr7	44879390	44880104	MACS_peak_169169	734.8	714	uc009grr.1	Med25	734.8	7.64	4.65	75613	2610034E13Rik|2610529E18Rik|ESTM2
chr19	6324516	6325478	MACS_peak_95175	732.98	962	NM_001033342	Cdc42bpg	732.98	19.57	4.71	240505	BC046418|MRCKgamma
chr17	27907500	27908178	MACS_peak_81823	732.3	678	uc008bpu.1	Taf11	732.3	15.4	4.7	68776	1110038O14Rik|28kDa|AI115401|AL024207|AW552398|PRO214|TAF2I|TAFII28
chr17	7945613	7946303	MACS_peak_79879	732.29	690	NM_025789	Rsph3a	732.29	20.22	4.7	66832	1700012G05Rik|4930524H12Rik|R74860|Rshl2|Rshl2a
chr17	35837996	35838306	MACS_peak_83050	732.22	310	ENSMUST00000001566	Tubb5	732.22	8.44	4.7	22154	AA408537|AI596182|B130022C14Rik|M(beta)5
chr3	9250566	9252080	MACS_peak_105609	731.68	1514	NM_177660	Zbtb10	731.68	17.3	9.06	229055	4832414A18|AU021107|RINZF
chr11	116138258	116138621	MACS_peak_35266	731.42	363	uc007mke.1	Mrpl38	731.42	7.68	5.79	60441	1110036N21Rik|4733401F03Rik|MRP-L3|R75240|Rpml3
chr10	67255447	67255775	MACS_peak_18375	731.1	328	NM_207221	Jmjd1c	731.1	11.65	5.79	108829	5430433L24Rik|D630035I23Rik|Jmjdic|TRIP8
chr5	144100435	144100776	MACS_peak_153954	730.53	341	NM_001081109	Lmtk2	730.53	12.83	4.69	231876	2900041G10Rik|A330101P12Rik|BREK|KPI-2|KPI2|aatyk2|cprk
chr11	69998300	69999132	MACS_peak_29823	728.27	832	NM_030064	Phf23	728.27	12.96	4.68	78246	2022-06-01
chr1	182446273	182446736	MACS_peak_12823	727.99	463	NM_173378	Trp53bp2	727.99	21.48	4.67	209456	53BP2|AI746547|ASPP2|PPP1R13A|Tp53bp2|X98550
chr11	70018465	70018949	MACS_peak_29601	727.48	484	ENSMUST00000108588	Dlg4	727.48	10.79	5.79	13385	Dlgh4|PSD-95|PSD95|SAP90|SAP90A
chr10	80409632	80410274	MACS_peak_19865	726.41	642	NM_011548	Tcf3	726.41	10.96	4.66	21423	A1|AA408400|ALF2|AW209082|E12|E12/E47|E2A|E47|ME2|Pan1|Pan2|TCF-3|Tcfe2a|VDIR|bHLHb21
chr4	148960575	148961794	MACS_peak_136268	726.27	1219	NM_019781	Pex14	726.27	17.75	5.78	56273	Pex14p|R75137
chr8	84676340	84677252	MACS_peak_167602	726.22	912	NM_025788	Nacc1	726.22	6.76	9.06	66830	2010001H03Rik|4930511N13Rik|Btbd14b|Nac1
chr19	43674475	43674881	MACS_peak_98248	725.87	406	NM_145156	Slc25a28	725.87	21.78	4.66	246696	2210403D18Rik|Mfrn2|Mrs3/4
chr5	32459010	32459407	MACS_peak_143030	725.41	397	NM_172707	Ppp1cb	725.41	13.4	4.66	19046	1200010B19
chrX	101319418	101323676	MACS_peak_200639	724.38	4258	ENSMUST00000065858	Nlgn3	724.38	8.59	5.8	245537	A230085M13Rik|HNL3|NL3
chr7	27195780	27196107	MACS_peak_167647	723.83	327	NM_001243888	BC024978	723.83	7.73	4.69	414069	-
chr11	3289868	3292045	MACS_peak_24207	723.69	2177	uc007hsj.2	Patz1	723.69	7.45	4.68	56218	8430401L15Rik|AI447519|Mazr|Patz|Zfp278
chr11	96064951	96065388	MACS_peak_32987	723.66	437	ENSMUST00000100528	Ube2z	723.66	17.06	4.68	268470	AW049199|C030047H17Rik|D11Moh35
chrX	6172341	6173015	MACS_peak_202032	723.59	674	ENSMUST00000103006	Nudt10	723.59	19.95	4.68	102954	AI853080|Dipp3a
chr2	120539294	120539686	MACS_peak_109624	721.43	392	uc008lwe.1	Zfp106	721.43	7.43	4.7	20402	Cd-1|D2Dcr28|H3a|Sh3bp3|Znf106|sirm
chr7	27280753	27282150	MACS_peak_167686	721.36	1397	NM_010950	Numbl	721.36	5.97	4.7	18223	nbl
chr5	134702714	134703824	MACS_peak_152493	721.26	1110	NM_007925	Eln	721.26	9.01	4.7	13717	AI385707|AI480567|E030024M20Rik
chr1	167226083	167226521	MACS_peak_11345	720.98	438	NM_030724	Uck2	720.98	14.26	4.69	80914	AA407809|AI481316|AU018180|AU020720|TSA903|UK|UMK|Umpk
chr2	130632826	130635464	MACS_peak_110739	720.12	2638	NM_197945	Lzts3	720.12	11.71	4.72	241638	Prosapip1
chr17	45541939	45545954	MACS_peak_83425	719.9	4015	NM_001013749	Tmem151b	719.9	9.08	4.72	210573	Gm323
chr10	115384958	115385807	MACS_peak_22700	719.78	849	NM_001033261	Zfc3h1	719.78	14.33	4.72	216345	BC033596|Ccdc131|Psrc2
chr2	79454001	79455048	MACS_peak_106892	719.34	1047	NM_010894	Neurod1	719.34	19.66	4.71	18012	BETA2|BHF-1|Neurod|bHLHa3
chr10	80287535	80288413	MACS_peak_19839	717.34	878	NM_001122605	Dazap1	717.34	18.44	4.7	70248	2410042M16Rik|mPrrp
chr10	79864780	79866181	MACS_peak_18183	717.31	1401	NM_181681	Lppr3	717.31	8.96	8.94	NA	NA
chr4	21873585	21874957	MACS_peak_125307	717.05	1372	ENSMUST00000098238	Sfrs18	717.05	8.87	5.83	NA	NA
chr3	30936284	30937156	MACS_peak_117853	716.09	872	NM_153421	Phc3	716.09	9.21	4.69	241915	E030046K01Rik|Edr3|Hph3
chr4	129010562	129011388	MACS_peak_136175	714.73	826	NM_016895	Ak2	714.73	14.57	4.68	11637	Ak-2|D4Ertd220e
chr14	55092007	55092324	MACS_peak_53006	714.48	317	ENSMUST00000036328	Zfhx2	714.48	12.29	8.94	239102	ZFH-5
chr10	76442564	76442912	MACS_peak_17773	713.72	348	NM_008787	Pcnt	713.72	24.45	8.92	18541	AW476095|C86676|KEN|Pcnt2|kendrin|m239Asp|m275Asp
chr2	26021396	26021760	MACS_peak_102066	713.15	364	NM_133835	Ubac1	713.15	10.22	4.71	98766	1110033G07Rik|AA407978|GBDR1|Gdbr1|Kpc2|Ubadc1
chr6	29609365	29609887	MACS_peak_141195	712.29	522	ENSMUST00000012679	Tnpo3	712.29	10.37	8.9	320938	5730544L10Rik|C430013M08Rik|C81142|D6Ertd313e|Trn-SR|mKIAA4133
chr19	4305901	4306222	MACS_peak_93181	711.47	321	NM_130863	Adrbk1	711.47	9.39	5.86	110355	Adrbk-1|Bark-1|GRK2|beta ARK|betaARK1
chr8	88199930	88200502	MACS_peak_181998	710.7	572	NM_001164497	Papd5	710.7	12.72	5.86	214627	5730445M16Rik|5830428A09
chr8	84246234	84246693	MACS_peak_185284	710.46	459	NM_001007571	D8Ertd738e	710.46	9.46	4.77	101966	AA589584
chr16	49699232	49699549	MACS_peak_75097	708.56	317	ENSMUST00000046777	Ift57	708.56	11.46	5.84	73916	4833420A15Rik|Esrrbl1|Hippi|MHS4R2
chr2	28205658	28206099	MACS_peak_92697	708.04	441	ENSMUST00000028177	Olfm1	708.04	20.93	8.85	56177	AMY|AW742568|Noe1|OlfA|Pancortin|Pancortin3
chr19	6234632	6235099	MACS_peak_95149	706.94	467	NM_198168	Ppp2r5b	706.94	7.12	4.77	225849	B'beta|BC026670
chr5	134522585	134523142	MACS_peak_152451	706.47	557	NM_009990	Clip2	706.47	8.01	4.77	269713	B230327O20|CLIP-115|Clip1|Cyln2|WSCR4|mKIAA0291|wbscr4
chr16	38089071	38090613	MACS_peak_75247	704.4	1542	NM_019827	Gsk3b	704.4	8.75	4.76	56637	7330414F15Rik|8430431H08Rik|C86142|GSK-3|GSK-3beta|GSK3
chr6	122828156	122828503	MACS_peak_164142	704.26	347	NM_021899	Foxj2	704.26	16.06	4.76	60611	Fhx
chr11	5081550	5082433	MACS_peak_22568	703.5	883	NM_001283063	Ewsr1	703.5	9.32	8.86	14030	Ews|Ewsh
chrX	77795547	77796278	MACS_peak_204352	702.71	731	ENSMUST00000036333	Prkx	702.71	19.69	4.75	19108	PKX1|Pkare
chr12	85638772	85639296	MACS_peak_43240	702.57	524	NM_030887	Jdp2	702.57	16.32	4.75	81703	Jundm2|Jundp2|TIF
chr6	134248273	134248804	MACS_peak_161599	702.51	531	NM_007961	Etv6	702.51	12.51	5.88	14011	AW123102|AW557856|Tel
chr15	97744769	97745666	MACS_peak_70272	702.1	897	NM_144850	Rapgef3	702.1	20.49	4.78	223864	2310016P22Rik|9330170P05Rik|Epac|Epac1
chr8	3453037	3453981	MACS_peak_178841	701.94	944	uc009krk.1	Arhgef18	701.94	21.06	4.78	102098	AI467246|D030053O22Rik
chr3	117360023	117360608	MACS_peak_123889	701.93	585	NM_177664	Lppr4	701.93	9.67	4.78	NA	NA
chr15	98533901	98534269	MACS_peak_70390	701.48	368	NM_133714	Kansl2	701.48	6.74	4.77	69612	2310037I24Rik|B930009D17
chr17	69383839	69384220	MACS_peak_85347	701.44	381	ENSMUST00000112676	Zbtb14	701.44	33.02	4.77	22666	ZF5|Zfp161|b2b1982Clo
chr7	99979971	99980458	MACS_peak_174042	700.95	487	NM_175388	Rnf169	700.95	12.03	4.77	108937	2900057K09Rik
chr2	156475533	156476006	MACS_peak_111379	700.86	473	NM_001006664	Epb4.1l1	700.86	13.48	5.91	NA	NA
chr8	95825353	95825868	MACS_peak_182742	700.53	515	ENSMUST00000074053	Gm10094	700.53	8.57	5.91	NA	NA
chr19	60580327	60581023	MACS_peak_99979	700.46	696	NM_030197	Cacul1	700.46	9.28	4.76	78832	2700078E11Rik|2810417M16Rik|9830127L17Rik|AI450346|D130033C15Rik
chr9	65346079	65347008	MACS_peak_191931	700.36	929	NM_016688	Pdcd7	700.36	13.79	5.9	50996	C80112|ES18
chr4	149647372	149648899	MACS_peak_125560	699.58	1527	NM_023051	Clstn1	699.58	6.42	8.91	65945	1810034E21Rik|Cst-1|Cstn1
chr12	113140235	113140614	MACS_peak_46059	699.22	379	NM_024223	Crip2	699.22	13.67	4.79	68337	0610010I23Rik|AW743261|C77570|CRP2|CRP4|Crp|ESP1|Hlp
chr5	137784460	137786701	MACS_peak_153059	696.91	2241	NM_144913	Mepce	696.91	13.22	4.77	231803	Bcdin3|D5Wsu46e
chr2	165812348	165812858	MACS_peak_112636	696.64	510	NM_027230	Zmynd8	696.64	14.08	5.94	228880	1110013E22Rik|2010005I16Rik|3632413B07Rik|AI316811|AL024039|Prkcbp1|RACK7
chr10	62598231	62598891	MACS_peak_18139	695.98	660	NM_019553	Ddx21	695.98	4.42	5.96	56200	AI255159|AL022742|D10Ertd645e|D10Wsu42e
chr5	8622487	8622952	MACS_peak_127018	695.95	465	NM_198620	Rundc3b	695.95	11.74	9	242819	Gm440
chr7	131966459	131967595	MACS_peak_173806	694.1	1136	NM_173410	Gpr26	694.1	15.92	5.95	233919	9630036A11Rik|A730021D22
chr5	65435623	65435946	MACS_peak_142388	693.38	323	ENSMUST00000031103	Ugdh	693.38	16.49	5.94	22235	Udpgdh
chr5	75044179	75044748	MACS_peak_146133	692.8	569	ENSMUST00000075452	Chic2	692.8	15.44	4.75	74277	1700081B18Rik|4930502K01Rik|BTL
chr6	82652623	82652929	MACS_peak_157094	692.54	306	ENSMUST00000095786	Pole4	692.54	13.38	5.97	66979	2400007P05Rik|5830430F06Rik
chr13	101757075	101758039	MACS_peak_53035	691.58	964	uc007rrv.1	Pik3r1	691.58	12.2	4.74	18708	PI3K|p50alpha|p55alpha|p85alpha
chr7	27673342	27674598	MACS_peak_167806	691.27	1256	uc009fwv.1	Map3k10	691.27	10.27	4.74	269881	BC028668|BC046514|MST|Mlk2
chr2	126742154	126742681	MACS_peak_110328	691.12	527	NM_019729	Usp8	691.12	7.91	4.77	84092	AI574262|AW557536|Ubpy|mKIAA0055
chr6	39522655	39523759	MACS_peak_157626	690.46	1104	NM_172477	Dennd2a	690.46	10.25	4.76	209773	B930096L08Rik|C130031G22|mKIAA1277
chr14	52232544	52232930	MACS_peak_57295	689.97	386	NM_201637	Chd8	689.97	7.48	5.95	67772	5830451P18Rik|AU015341|Duplin|HELSNF1|mKIAA1564
chr2	179975412	179976646	MACS_peak_116046	689.93	1234	NM_001081092	Taf4a	689.93	26.61	4.76	NA	NA
[truncated: 4,598 more rows]

## Sheet: OGDR3h-m1A_mRNA
Chromosome	Transcript start	Transcript end	Peak ID	Score	Peak length	Transcript ID	Gene name	P value (-log10)	Fold enrichment	FDR	Gene ID	Synonyms
[truncated: 4,948 more rows]
