# Supplementary material for: The landscape of m1A modification and its posttranscriptional regulatory functions in primary neurons
Source: eLife. 2023 Mar 7;12:e85324. doi: 10.7554/eLife.85324 (PMC9991057; doi:10.7554/eLife.85324)
Supplement: Figure 2—source data 2. [file elife-85324-fig2-data2.xlsx]

## Sheet: Down-OGDR1.5h_vs_Control
Chromosome	Transcript start	Transcript end	Peak ID	Score	Peak length	Transcript ID	Gene name	Fold change	P value	FDR	Regulation	Gene ID	Synonyms
chr2	163862821	163863160	diffreps_peak_00085175	6.20486	339	ENSMUST00000044734	Rims4	2.58472	6.23943e-07	2.19131e-05	down	241770	6530406L02|Rim4
chr11	53186281	53186740	diffreps_peak_00020394	12.5734	459	NM_177059	Fstl4	7.31172	2.67073e-13	2.37958e-09	down	320027	B230374F23Rik|SPIG1|mKIAA1061
chr11	67688041	67688420	diffreps_peak_00021700	6.12627	379	NM_008088	Gas7	3.25691	7.47709e-07	2.51059e-05	down	14457	AW124766|B230343A10Rik|Gas7-cb
chr10	128128101	128128480	diffreps_peak_00017415	6.69153	379	NM_054078	Baz2a	3.1278	2.03458e-07	9.11542e-06	down	116848	AA415431|C030005G16Rik|C78388|Tip5|Walp3|mKIAA0314
chr19	58809161	58809560	diffreps_peak_00074765	6.43025	399	uc008iay.1	Hspa12a	2.83724	3.71321e-07	1.45746e-05	down	73442	1700063D12Rik|AI118035|AI840429|AW048913|AW556406|D5Mgi40|Gm19925|mKIAA0417
chr17	34632121	34632800	diffreps_peak_00061911	6.79051	679	ENSMUST00000015620	Prrt1	2.38904	1.6199e-07	7.61551e-06	down	260297	Bat-4|Bat4|D17H6S54E|DSPD1|G5b|NG5|ORF31
chrX	103185461	103186240	diffreps_peak_00155732	5.44539	779	NM_008671	Nap1l2	2.60572	3.58597e-06	8.8187e-05	down	17954	Bpx
chr7	127805061	127805560	diffreps_peak_00134394	5.43716	499	ENSMUST00000106267	Stx1b	2.78123	3.65456e-06	8.96587e-05	down	56216	Stx1b2|Stx1bl|Syn1b
chr1	43033601	43033940	diffreps_peak_00001856	8.28527	339	NM_053107	Gpr45	158.2	5.1848e-09	6.4985e-07	down	93690	9230112G11Rik|AW046772
chr11	11114015	11114380	diffreps_peak_00018387	7.32719	365	NM_177033	Vwc2	18.3012	4.70772e-08	3.01402e-06	down	319922	A930041G11Rik|G11|PSST739|UNQ739|cradin
chr1	125872421	125872800	diffreps_peak_00005434	6.06584	379	NM_027677	Gpr39	2.23224	8.59322e-07	2.79876e-05	down	71111	4933415E13Rik
chr7	4539861	4540298	diffreps_peak_00124590	5.97508	437	NM_016908	Syt5	2.42955	1.05906e-06	3.31242e-05	down	53420	SytV
chr11	98348501	98349174	diffreps_peak_00025451	6.39068	673	ENSMUST00000078694	Ppp1r1b	2.38161	4.06747e-07	1.56327e-05	down	19049	AU040756|DARPP-32|Darpp32
chr2	119269200	119269880	diffreps_peak_00081538	5.80678	680	NM_145530	Rhov	2.60854	1.56035e-06	4.50999e-05	down	228543	A030005A06Rik|Arhv
chr9	89603001	89603360	diffreps_peak_00150495	7.93663	359	NM_153509	AF529169	41.2826	1.1571e-08	1.12753e-06	down	209743	DD1|Kiaa1024
chr18	33193981	33194360	diffreps_peak_00066972	6.26016	379	NM_009793	Camk4	3.41691	5.49334e-07	1.98367e-05	down	12326	A430110E23Rik|AI666733|CaMKIV|CaMKIV/Gr|D18Bwg0362e
chr10	89575641	89576040	diffreps_peak_00015228	5.54018	399	NM_182959	Slc17a8	6.95023	2.88284e-06	7.40502e-05	down	216227	BC042593|Vglut3
chr4	42922361	42922693	diffreps_peak_00095841	6.46434	332	ENSMUST00000139100	N28178	2.23757	3.43286e-07	1.37052e-05	down	NA	NA
chr14	70079161	70079900	diffreps_peak_00044179	7.68312	739	NM_018781	Egr3	3.2985	2.07436e-08	1.67557e-06	down	13655	Pilot
chr7	45699842	45700339	diffreps_peak_00128454	5.37518	497	ENSMUST00000003360	Car11	2.21186	4.2152e-06	0.000100736	down	12348	Ca11
chr15	84105430	84105754	diffreps_peak_00050638	6.41528	324	NM_013873	Sult4a1	2.08248	3.84343e-07	1.49767e-05	down	29859	2400007A17Rik|AI853543|BR-STL-1|ST4A1|Sultx3
chr2	79454621	79455048	diffreps_peak_00079797	5.69033	427	NM_010894	Neurod1	2.30858	2.04017e-06	5.62019e-05	down	18012	BETA2|BHF-1|Neurod|bHLHa3
chr19	4476934	4477280	diffreps_peak_00070776	5.11645	346	ENSMUST00000059295	Syt12	4.96175	7.64807e-06	0.00016186	down	171180	-
chr13	52530441	52530836	diffreps_peak_00037396	5.87138	395	NM_001024474	Diras2	2.99165	1.34469e-06	4.02105e-05	down	68203	2900052J15Rik|AI414999
chr2	92059661	92060180	diffreps_peak_00080303	7.27567	519	uc008kxg.1	AK039132	9.1425	5.3007e-08	3.2877e-06	down	NA	NA
chr6	37806601	37806940	diffreps_peak_00117950	6.52333	339	uc009bjh.1	Atp6v0c	17.9909	2.99685e-07	1.23818e-05	down	11984	Atp6c|Atp6c2|Atp6l|Atpl|Atpl-rs1|PL16|VATL|Vma3
chr13	54749569	54749874	diffreps_peak_00037583	5.8313	305	ENSMUST00000135343	Gprin1	2.28571	1.4747e-06	4.33581e-05	down	26913	GRIN1|Z16
chr19	6532721	6533080	diffreps_peak_00071413	6.81637	359	NM_020253	Nrxn2	2.13399	1.52627e-07	7.28594e-06	down	18190	6430591O13Rik|mKIAA0921
chr11	61449221	61449877	diffreps_peak_00021305	5.85672	656	NM_009548	Rnf112	2.65428	1.39086e-06	4.12959e-05	down	22671	ZNF179|Zfp179|bfp
chr12	71309883	71310307	diffreps_peak_00031597	6.29715	424	NM_021532	Dact1	2.05067	5.0449e-07	1.85076e-05	down	59036	4921528D17Rik|AI115603|DAPPER|DAPPER1|FRODO|Frd1|Frodo1|MDpr1|MTNG3|THYEX3
chr5	98275210	98275520	diffreps_peak_00109780	8.30303	310	NM_010203	Fgf5	164.3	4.977e-09	6.3117e-07	down	14176	Fgf-5|HBGF-5|angora|go
chr13	45389741	45390043	diffreps_peak_00036848	6.28434	302	NM_153789	Mylip	2.44207	5.19584e-07	1.89413e-05	down	218203	9430057C20Rik|Mir
chr11	4939201	4939940	diffreps_peak_00017982	6.29582	739	NM_010904	Nefh	2.32712	5.06032e-07	1.85476e-05	down	380684	NF-H|NF200|Nfh|mKIAA0845
chr7	51622341	51622720	diffreps_peak_00129008	8.20622	379	NM_080853	Slc17a6	2.3148	6.21991e-09	7.44091e-07	down	140919	2900073D12Rik|DNPI|VGLUT2
chr5	134216135	134216480	diffreps_peak_00114106	6.31916	345	NM_053266	Gtf2ird2	3.70847	4.79559e-07	1.77551e-05	down	114674	1700012P16Rik
chr7	27656621	27656986	diffreps_peak_00126642	5.95847	365	NM_001290528	Map3k10	2.04082	1.10035e-06	3.4207e-05	down	269881	BC028668|BC046514|MST|Mlk2
chr5	108519741	108520326	diffreps_peak_00110520	5.2723	585	NM_007756	Cplx1	2.44577	5.34201e-06	0.000120976	down	12889	921-S
chr9	37552536	37552900	diffreps_peak_00146683	6.02632	364	ENSMUST00000065668	Nrgn	2.92345	9.41201e-07	3.00761e-05	down	64011	0710001B06Rik|AI838505|NG|NG/RC3|Pss1|R75334|RC3
chr11	6600501	6600920	diffreps_peak_00018307	5.68637	419	NM_001081652	Nacad	2.1806	2.05889e-06	5.6611e-05	down	192950	D230024G13Rik|mKIAA0363
chr2	32788121	32788500	diffreps_peak_00077518	5.53449	379	NM_009295	Stxbp1	2.30788	2.92083e-06	7.49414e-05	down	20910	AI317162|AI326233|MMS10-G|Ms10g|Munc-18a|Munc18-1|N-sec1|Rb-sec1|Sxtbp1|Unc18-1|Unc18h|nsec1
chr19	23947261	23947580	diffreps_peak_00072426	6.21446	319	NM_177034	Apba1	2.18167	6.10289e-07	2.15217e-05	down	319924	6430513E09Rik|Lin-10|Mint|Mint1|Urop11|X11|X11alpha
chr3	38981881	38982320	diffreps_peak_00088425	5.88891	439	NM_183221	Fat4	2.02093	1.29149e-06	3.8898e-05	down	329628	6030410K14Rik|9430004M15
chrX	155622959	155623327	diffreps_peak_00156981	6.57846	368	NM_001093750	Ptchd1	2.77173	2.63959e-07	1.12528e-05	down	211612	9630036J22Rik|AI848149|Gm387
chr11	98002741	98003362	diffreps_peak_00025367	5.40549	621	NM_145121	Cacnb1	2.03132	3.93104e-06	9.50756e-05	down	12295	CAB1|Cchb1|Cchlb1
chr11	50122581	50122960	diffreps_peak_00020075	5.60417	379	NM_001290750	Rnf130	2.15527	2.48791e-06	6.55826e-05	down	59044	2510042A13Rik|G1RZFP|G1rp|GOLIATH|GP
chr14	99301921	99302254	diffreps_peak_00045054	7.98756	333	NM_009769	Klf5	3.08111	1.02905e-08	1.04968e-06	down	12224	4930520J07Rik|Bteb2|CKLF|IKLF
chr7	130392601	130392960	diffreps_peak_00134580	6.47354	359	NM_013799	Ate1	3.00499	3.36097e-07	1.3497e-05	down	11907	AI225793|AW547406
chr7	99319381	99319760	diffreps_peak_00131781	6.55062	379	NM_001048167	Map6	2.82065	2.81439e-07	1.18078e-05	down	17760	2810411E12Rik|Map-6|Mtap6|STOP
chr7	127806961	127807389	diffreps_peak_00134396	6.05176	428	NM_024414	Stx1b	2.03022	8.8764e-07	2.87155e-05	down	56216	Stx1b2|Stx1bl|Syn1b
chr10	127092321	127092840	diffreps_peak_00017143	6.34685	519	NM_001033263	Agap2	2.24443	4.49932e-07	1.69025e-05	down	216439	AGAP-2|Centg1|PIKE|cnt-g1|mKIAA0167
chr2	28229441	28229780	diffreps_peak_00076668	6.3643	339	NM_019498	Olfm1	2.37534	4.32213e-07	1.64114e-05	down	56177	AMY|AW742568|Noe1|OlfA|Pancortin|Pancortin3
chr9	114978568	114978900	diffreps_peak_00152496	7.88427	332	ENSMUST00000183104	Osbpl10	2.73162	1.30537e-08	1.22037e-06	down	74486	4933433D06Rik|C820004B04Rik|OPR-10|ORP-10
chr6	28416481	28416860	diffreps_peak_00117129	5.0719	379	ENSMUST00000090511	Gcc1	76.4	8.47427e-06	0.000174358	down	74375	4932417P04Rik
chr1	134332289	134332660	diffreps_peak_00006284	9.64427	371	NM_001144855	Ppfia4	2.57563	2.26845e-10	7.20723e-08	down	68507	100042382|1110008G13Rik|AI448359|AI852265|C81506|Gm3812
chr12	111828981	111829340	diffreps_peak_00034668	9.69088	359	NM_011625	Ppp1r13b	3.42502	2.03762e-10	6.61747e-08	down	21981	AI449786|ASPP1|AW545810|Tp53bp2|Trp53bp2|p85
chr17	57087456	57087782	diffreps_peak_00063844	10.5289	326	NM_009451	Tubb4a	2.64144	2.95871e-11	1.75745e-08	down	22153	AI325297|M(beta)4|Tubb|Tubb4
chr9	45126381	45126980	diffreps_peak_00147346	6.54799	599	NM_001014761	Scn2b	3.10821	2.83143e-07	1.18512e-05	down	72821	2810451E09Rik|AI840361|Gm183
chr2	92599706	92600148	diffreps_peak_00080397	7.23869	442	NM_023850	Chst1	2.55409	5.77179e-08	3.49216e-06	down	76969	2610008E20Rik|AW125896|C6ST|GST-1|Gst1|KSGAL6ST
chr6	86107901	86108260	diffreps_peak_00120301	6.3954	359	NM_001271860	Add2	2.45554	4.0235e-07	1.55175e-05	down	11519	2900072M03Rik|add97
chr11	67683337	67683680	diffreps_peak_00021698	6.31239	343	NM_008088	Gas7	2.02514	4.87091e-07	1.79723e-05	down	14457	AW124766|B230343A10Rik|Gas7-cb
chr1	37624901	37625280	diffreps_peak_00001432	5.40685	379	NM_028096	2010300C02Rik	5.37913	3.91876e-06	9.48124e-05	down	72097	-
chr16	49912841	49913200	diffreps_peak_00056625	5.7246	359	ENSMUST00000084838	Cd47	2.62571	1.8854e-06	5.25458e-05	down	16423	9130415E20Rik|AA407862|AI848868|AW108519|B430305P08Rik|IAP|Itgp
chr2	36083201	36083740	diffreps_peak_00077950	6.19449	539	NM_008500	Lhx6	3.79724	6.39009e-07	2.23122e-05	down	16874	Lhx6.1
chr2	168268468	168269331	diffreps_peak_00085841	6.48688	863	NM_001081134	Kcng1	2.63906	3.25925e-07	1.31634e-05	down	241794	AW536275|OTTMUSG00000016048
chr6	55679261	55679671	diffreps_peak_00119066	5.27078	410	NM_009717	Neurod6	2.46369	5.36065e-06	0.000121319	down	11922	Atoh2|Math-2|Math2|Nex|Nex1m|bHLHa2
chr7	44357421	44357780	diffreps_peak_00127842	6.31799	359	NM_001034115	Shank1	2.33543	4.8085e-07	1.77877e-05	down	243961	-
chr18	33184781	33185240	diffreps_peak_00066971	5.38042	459	NM_009793	Camk4	2.06932	4.16464e-06	9.97251e-05	down	12326	A430110E23Rik|AI666733|CaMKIV|CaMKIV/Gr|D18Bwg0362e
chr12	29827041	29827500	diffreps_peak_00030147	6.47114	459	NM_008666	Myt1l	2.59531	3.37956e-07	1.35475e-05	down	17933	2900046C06Rik|2900093J19Rik|C630034G21Rik|Nztf1|Pmng1|Png-1|mKIAA1106
chr11	28583701	28584200	diffreps_peak_00018947	6.13867	499	NM_181577	Ccdc85a	2.31968	7.26651e-07	2.45362e-05	down	216613	-
chr13	99425201	99425660	diffreps_peak_00039372	5.07024	459	NM_008634	Map1b	2.07965	8.50667e-06	0.000174867	down	17755	A230055D22|AI843217|LC1|MAP5|Mtap-5|Mtap1b|Mtap5
chr17	25809084	25809386	diffreps_peak_00060362	5.91569	302	NM_001164225	Fbxl16	2.05544	1.21425e-06	3.70286e-05	down	214931	BC042620|Scirr1
chr6	135715681	135716340	diffreps_peak_00123663	5.06322	659	ENSMUST00000053880	Grin2b	3.0453	8.64531e-06	0.000177183	down	14812	AW490526|GluN2B|NR2B|Nmdar2b
chr1	75247040	75247500	diffreps_peak_00003425	6.25562	460	NM_008985	Ptprn	2.70853	5.55116e-07	1.99857e-05	down	19275	IA-2|mIA-A|mKIAA4064
chrX	42532541	42532940	diffreps_peak_00154105	6.294	399	NM_011855	Tenm1	2.44719	5.08158e-07	1.86155e-05	down	23963	Odz1|Odz2|TCAP-1|Ten-m1|ten-1
chr17	8341981	8342320	diffreps_peak_00059227	5.42743	339	NM_178774	Prr18	3.1147	3.73744e-06	9.12767e-05	down	320111	9630019K15Rik
chr11	118490081	118490500	diffreps_peak_00028121	5.69488	419	NM_001024931	Rbfox3	2.6755	2.0189e-06	5.57249e-05	down	52897	Fox-3|Hrnbp3|NeuN|Neuna60
chr7	111779312	111779720	diffreps_peak_00132733	5.69434	408	NM_173739	Galnt18	2.16039	2.02143e-06	5.5768e-05	down	233733	2900011G21Rik|BC024988|Galntl4
chr4	152271473	152271855	diffreps_peak_00104292	8.59499	382	NM_133348	Acot7	2.17073	2.54102e-09	4.0618e-07	down	70025	2410041A17Rik|Ach1|Act|Bach|CTE-IIa|Cte-II|Lach1
chr13	105443692	105444020	diffreps_peak_00039723	6.11446	328	NM_008308	Htr1a	2.4279	7.68325e-07	2.56586e-05	down	15550	Gpcr18
chr5	137734839	137735160	diffreps_peak_00114841	7.46582	321	NM_175521	Nyap1	2.14989	3.42122e-08	2.3961e-06	down	243300	6430598A04Rik
chr2	92971561	92971960	diffreps_peak_00080412	5.45705	399	ENSMUST00000111274	Prdm11	22.4	3.49099e-06	8.66835e-05	down	100042784	8030443D09Rik|AA163972|Gm707
chr8	14831301	14831758	diffreps_peak_00136851	6.02881	457	uc009kyz.1	Dlgap2	2.14061	9.35809e-07	2.99504e-05	down	244310	6430596N04Rik|DAP2|Sapap2
chr1	72428121	72428820	diffreps_peak_00003163	6.15027	699	NM_001045533	2022-03-04	2.19648	7.07507e-07	2.40204e-05	down	381270	BC056494|mKIAA1399
chr2	79454021	79454520	diffreps_peak_00079795	5.75394	499	NM_010894	Neurod1	2.08046	1.76223e-06	4.97617e-05	down	18012	BETA2|BHF-1|Neurod|bHLHa3
chr16	23889580	23889880	diffreps_peak_00054874	6.44392	300	NM_009215	Sst	2.37295	3.59812e-07	1.41962e-05	down	20604	SOM|SRIF|SS|Smst
chr12	85139141	85139640	diffreps_peak_00032822	7.70155	499	NM_146244	Rps6kl1	2.92295	1.98815e-08	1.62321e-06	down	238323	A830084F09Rik|AW046440
chr4	121016781	121017247	diffreps_peak_00100033	5.7493	466	NM_133716	Smap2	2.08505	1.78116e-06	5.01453e-05	down	69780	1810031K02Rik|AA408614|Smap1l
chr11	81151941	81152400	diffreps_peak_00023748	9.12745	459	NM_007384	Asic2	3.61681	7.45675e-10	1.71119e-07	down	11418	ACIC2|Accn1|BNC1|BNaC1|BNaC1a|Mdeg
chr4	124659221	124659660	diffreps_peak_00100259	6.49988	439	NM_011141	Pou3f1	2.36213	3.16316e-07	1.28921e-05	down	18991	Oct-6|Oct6|Otf-6|Otf6|Scip|Test1|Tst-1|Tst1
chr1	56795381	56795700	diffreps_peak_00002297	7.71623	319	NM_139146	Satb2	3.24143	1.92209e-08	1.59147e-06	down	212712	mKIAA1034
chr19	10858481	10859000	diffreps_peak_00071997	5.23269	519	NM_133804	Tmem132a	2.35503	5.85202e-06	0.000130055	down	98170	6720481D13Rik|Hspa5bp1|Orai1|R74613
chr15	92397141	92397505	diffreps_peak_00051537	7.46693	364	NM_001164593	Pdzrn4	122.6	3.41247e-08	2.39161e-06	down	239618	1110017D07Rik|LNX4|SAMCAP3L|mKIAA3027
chr10	41070821	41071180	diffreps_peak_00011533	10.579	359	NM_199058	Gpr6	10.2719	2.63641e-11	1.63219e-08	down	140741	AI852874|Gm233
chr14	68086486	68086806	diffreps_peak_00044057	5.13457	320	NM_010910	Nefl	2.14709	7.3355e-06	0.000156604	down	18039	AI847934|CMT2E|NF-L|NF68|Nfl
chr7	44357941	44358280	diffreps_peak_00127843	7.13402	339	NM_001034115	Shank1	2.13238	7.34477e-08	4.14983e-06	down	243961	-
chr9	79818001	79818440	diffreps_peak_00150218	6.61698	439	NM_001081243	Filip1	2.813	2.41555e-07	1.04698e-05	down	70598	5730485H21Rik|AI843021
chr11	103650141	103650580	diffreps_peak_00026269	6.65845	439	NM_001033212	Rprml	6.57899	2.19559e-07	9.67813e-06	down	104582	AW049332
chr6	13838721	13839179	diffreps_peak_00116717	8.02607	458	NM_145066	Gpr85	2.39896	9.41748e-09	9.83637e-07	down	64450	2900026B03Rik
chr7	44603461	44604000	diffreps_peak_00127993	5.45583	539	NM_008422	Kcnc3	3.14144	3.50079e-06	8.68847e-05	down	16504	KShIIID|Kcr2-3|Kv3.3
chr7	44353881	44354200	diffreps_peak_00127839	7.6594	319	NM_001034115	Shank1	2.14676	2.1908e-08	1.73677e-06	down	243961	-
chr19	8678961	8679340	diffreps_peak_00071684	5.74584	379	NM_007698	Chrm1	3.26429	1.7954e-06	5.05255e-05	down	12669	Chrm-1|M1|M1R
chr7	73740021	73740380	diffreps_peak_00130117	9.41094	359	ENSMUST00000169090	A830073O21Rik	18.5432	3.88203e-10	1.07359e-07	down	320262	-
chr2	27110961	27111320	diffreps_peak_00076506	9.02699	359	NM_175427	Fam163b	3.26662	9.39744e-10	2.03216e-07	down	109349	C630035N08Rik
chr1	121504781	121505160	diffreps_peak_00005321	6.31388	379	NM_029955	Ccdc93	2.1438	4.85425e-07	1.79307e-05	down	70829	4633402D15Rik|9230102M16Rik
chr11	98325601	98325920	diffreps_peak_00025440	6.39483	319	NM_010895	Neurod2	2.20936	4.02873e-07	1.55275e-05	down	18013	Ndrf|bHLHa1
chr10	116418001	116418340	diffreps_peak_00016318	5.90238	339	NM_021452	Kcnmb4	2.05428	1.25205e-06	3.79499e-05	down	58802	1700058G18Rik|2900045G12Rik
chr5	128759501	128760140	diffreps_peak_00113447	7.47777	639	uc008zsk.2	Rimbp2	4.6114	3.32835e-08	2.34791e-06	down	231760	A930033C01Rik|mKIAA0318
chr7	126446001	126446400	diffreps_peak_00133926	7.46379	399	uc009jrd.1	Rabep2	119.2	3.43728e-08	2.39924e-06	down	70314	2610011A08Rik|AI462746|Fra
chr17	27710221	27710620	diffreps_peak_00060761	5.9363	399	NM_011861	Pacsin1	2.79764	1.15797e-06	3.56572e-05	down	23969	A830061D09Rik|H74|mKIAA1379|syndapin
chr2	120700701	120701020	diffreps_peak_00081743	5.57721	319	ENSMUST00000140843	Stard9	87.1	2.6472e-06	6.90357e-05	down	668880	4831403C07Rik|E230025N21Rik|Kif16a|mKIAA1300
chr10	61739041	61739360	diffreps_peak_00012484	5.72146	319	NM_207000	H2afy2	2.28618	1.89908e-06	5.28911e-05	down	404634	macroH2A2
chr8	29219241	29219636	diffreps_peak_00137677	6.58723	395	NM_153135	Unc5d	2.44532	2.58686e-07	1.10695e-05	down	210801	D930029E11Rik|Unc5h4|mKIAA1777
chr15	75909734	75910040	diffreps_peak_00049137	5.11952	306	NM_178646	Tigd5	3.82579	7.59422e-06	0.000160887	down	105734	AA409802|AA409995|AI666797
chr10	60132821	60133300	diffreps_peak_00012376	5.34608	479	NM_052994	Spock2	2.38957	4.5073e-06	0.000105442	down	94214	AA407235|Gcap26|mKIAA0275
chr9	58860101	58860420	diffreps_peak_00148690	5.26787	319	NM_001081192	Hcn4	2.43306	5.3967e-06	0.000121879	down	330953	Bcng3|Hcn3
chr10	78814481	78814825	diffreps_peak_00013718	6.4274	344	NM_009200	Slc1a6	4.24085	3.73763e-07	1.4648e-05	down	20513	EAAT4
chr3	96185121	96185607	diffreps_peak_00091186	5.28049	486	NM_022030	Sv2a	2.95909	5.2421e-06	0.00011907	down	64051	AI746429|mKIAA0736
chr7	126950534	126951100	diffreps_peak_00134097	8.44239	566	NM_144926	Sez6l2	2.28227	3.61086e-09	5.16012e-07	down	233878	AI835913|AW121566|BSRP-A|Psk1
chr16	20702661	20703020	diffreps_peak_00054674	6.1386	359	NM_133778	Fam131a	2.56367	7.26773e-07	2.45363e-05	down	78408	2900046G09Rik
chr17	57080065	57080740	diffreps_peak_00063838	5.92176	675	NM_009451	Tubb4a	2.34545	1.19741e-06	3.66415e-05	down	22153	AI325297|M(beta)4|Tubb|Tubb4
chr9	37544881	37545331	diffreps_peak_00146681	6.23229	450	NM_022029	Nrgn	2.85782	5.85749e-07	2.08613e-05	down	64011	0710001B06Rik|AI838505|NG|NG/RC3|Pss1|R75334|RC3
chr15	98804781	98805260	diffreps_peak_00052082	7.34928	479	NM_001013741	Ddn	2.63734	4.4742e-08	2.90798e-06	down	13199	Gm748
chr4	136945941	136946315	diffreps_peak_00102347	6.12966	374	NM_007939	Epha8	3.30556	7.41895e-07	2.49564e-05	down	13842	AW047546|Eek|Hek3|mKIAA1459
chr3	138069741	138070260	diffreps_peak_00093203	7.48251	519	ENSMUST00000163080	1110002E22Rik	30.8444	3.29222e-08	2.32908e-06	down	100039528	AI415341|Gm2292
chr15	79484421	79485040	diffreps_peak_00049878	5.97964	619	NM_008427	Kcnj4	2.61437	1.048e-06	3.28485e-05	down	16520	IRK3|Kcnf2|MB-IRK3
chr15	44752086	44752420	diffreps_peak_00047870	6.6524	334	NM_178765	Sybu	2.57125	2.22637e-07	9.78644e-06	down	319613	Golsyn
chr11	6601761	6602140	diffreps_peak_00018308	6.63581	379	NM_001081652	Nacad	2.01505	2.31307e-07	1.01198e-05	down	192950	D230024G13Rik|mKIAA0363
chr15	98805301	98805800	diffreps_peak_00052083	5.78109	499	NM_001013741	Ddn	2.20057	1.65544e-06	4.72946e-05	down	13199	Gm748
chr2	118663302	118663720	diffreps_peak_00081448	7.51949	418	ENSMUST00000099557	Pak6	2.14304	3.0235e-08	2.2004e-06	down	214230	4732456M09
chr6	128408101	128408520	diffreps_peak_00123425	5.08865	419	NM_021717	Nrip2	6.18584	8.15364e-06	0.00016927	down	60345	AW491344|NIX1
chr11	28576941	28577345	diffreps_peak_00018944	6.11883	404	NM_181577	Ccdc85a	2.34047	7.6062e-07	2.5436e-05	down	216613	-
chr17	24639861	24640220	diffreps_peak_00060111	6.4461	359	NM_023055	Slc9a3r2	2.27403	3.58016e-07	1.41441e-05	down	65962	0610011L07Rik|1200011K07Rik|2010007A20Rik|E3karp|NHERF-2|Nherf2|Octs2|Sip-1|Sip1|Sryip1|Tka-1
chr2	144473341	144473680	diffreps_peak_00083271	8.38902	339	NM_172859	Dzank1	6.85953	4.083e-09	5.60427e-07	down	241688	2810039F03Rik|6330439K17Rik|6430408C01|AI851115|Ankrd64
chr9	111366141	111366780	diffreps_peak_00152333	5.34231	639	NM_001164659	Trank1	2.10227	4.54666e-06	0.000106096	down	320429	A230061D21Rik|C030048J01Rik|Gm187|Lba1
chr3	107458241	107458640	diffreps_peak_00092011	7.82451	399	NM_145922	Kcnc4	5.262	1.49794e-08	1.32139e-06	down	99738	AI850292|KSHIIIC|Kcr2-4|Kv3.4
chr2	58822041	58822400	diffreps_peak_00078828	8.04296	359	NM_001001178	Ccdc148	107.9	9.05824e-09	9.58822e-07	down	227933	5830402J09
chr7	142081901	142082300	diffreps_peak_00135430	6.46805	399	NM_008748	Dusp8	2.02353	3.4037e-07	1.36179e-05	down	18218	5530400B01Rik|AI593498|Nttp1
chr5	128758021	128758420	diffreps_peak_00113444	6.23787	399	uc008zsk.2	Rimbp2	2.31704	5.78263e-07	2.06737e-05	down	231760	A930033C01Rik|mKIAA0318
chr1	56796681	56797244	diffreps_peak_00002298	5.66748	563	NM_139146	Satb2	2.11148	2.1504e-06	5.85148e-05	down	212712	mKIAA1034
chr18	68254008	68254380	diffreps_peak_00069294	6.46747	372	NM_172631	Ldlrad4	2.22441	3.40826e-07	1.36309e-05	down	52662	8230401C20Rik|A430083H02|A430108L08Rik|C18orf1|D18Ertd653e|D330030L18Rik
chr1	188972161	188972683	diffreps_peak_00009446	5.04874	522	NM_172650	Kctd3	2.03062	8.93841e-06	0.000182062	down	226823	4930438A20Rik|9330185B06|E330032J19Rik|NY-REN-45
chr7	67733121	67733740	diffreps_peak_00129963	6.37039	619	NM_201639	Synm	2.36824	4.26197e-07	1.6222e-05	down	233335	4930412K21Rik|AI852401|Dmn|E130104F11|Syn|Synemin
chr5	146833281	146833720	diffreps_peak_00115997	6.13905	439	ENSMUST00000099272	Rpl21	2.00407	7.26015e-07	2.45228e-05	down	19933	8430440E03Rik|L21
chr10	77900141	77900900	diffreps_peak_00013604	5.24762	759	NM_145152	Lrrc3	2.08513	5.65428e-06	0.000126663	down	237387	1300011L04Rik|C21orf102
chr1	74855961	74856940	diffreps_peak_00003377	6.28196	979	NM_009872	Cdk5r2	2.38234	5.22441e-07	1.90299e-05	down	12570	B230310J22Rik|p39
chr14	66361074	66361680	diffreps_peak_00043973	5.76589	606	NM_019675	Stmn4	2.2368	1.71441e-06	4.86604e-05	down	56471	Lagl|R75359|RB3
chr5	37245763	37246096	diffreps_peak_00107536	6.45581	333	NM_007765	Crmp1	2.18895	3.50096e-07	1.38851e-05	down	12933	CRMP-1|DRP-1|Dpysl1|ULIP-3|Ulip3
chr2	180499975	180500500	diffreps_peak_00086776	6.025	525	NM_018766	Ntsr1	2.37561	9.44054e-07	3.0139e-05	down	18216	NT-1R|NTR-1|NTR1
chr19	10450441	10450820	diffreps_peak_00071946	6.15979	379	NM_018801	Syt7	2.46043	6.92159e-07	2.36163e-05	down	54525	AI851541|B230112P13Rik
chr13	57429121	57429485	diffreps_peak_00037818	5.36565	364	NM_009262	Spock1	2.90114	4.30869e-06	0.00010225	down	20745	Spock|Ticn1|testican
chr8	70257121	70257440	diffreps_peak_00139318	5.54262	319	uc009lzn.1	Sugp2	2.01972	2.86667e-06	7.36901e-05	down	234373	Sfrs14|Srsf14|mKIAA0365
chr1	75216221	75216593	diffreps_peak_00003409	6.59971	372	NM_009447	Tuba4a	2.32491	2.51357e-07	1.08235e-05	down	22145	M[a]4|Tuba4
chr11	75770921	75771640	diffreps_peak_00022959	6.15001	719	NM_007873	Doc2b	2.67557	7.07923e-07	2.40279e-05	down	13447	-
chr10	60134201	60135198	diffreps_peak_00012378	6.67661	997	ENSMUST00000121820	Spock2	2.27372	2.10567e-07	9.37451e-06	down	94214	AA407235|Gcap26|mKIAA0275
chr2	164967982	164968454	diffreps_peak_00085320	7.88302	472	ENSMUST00000099092	Slc12a5	2.25228	1.30913e-08	1.22221e-06	down	57138	KCC2|mKIAA1176
chr17	63050661	63051120	diffreps_peak_00063905	7.22462	459	NM_015794	Fbxl17	10.1711	5.96187e-08	3.56091e-06	down	50758	6330576B01Rik|AI452053|BB073797|C130023C01Rik|Fbx13|Fbxo13
chr12	78963541	78964120	diffreps_peak_00032082	5.89495	579	NM_178745	Tmem229b	2.15317	1.27364e-06	3.84564e-05	down	268567	6330442E10Rik|9830138K24|AU019070
chr9	37544491	37544820	diffreps_peak_00146680	6.34226	329	ENSMUST00000065668	Nrgn	2.91482	4.54717e-07	1.70371e-05	down	64011	0710001B06Rik|AI838505|NG|NG/RC3|Pss1|R75334|RC3
chr7	18964701	18965280	diffreps_peak_00125518	6.16239	579	NM_001029877	Nova2	2.07504	6.88037e-07	2.35074e-05	down	384569	Gm1424
chr1	36322901	36323420	diffreps_peak_00001296	6.65453	519	NM_145996	Arid5a	83.9	2.21552e-07	9.74742e-06	down	214855	D430024K22Rik|Mrf1
chr13	96088301	96088900	diffreps_peak_00039248	6.02146	599	NM_029210	Sv2c	2.50803	9.51793e-07	3.03341e-05	down	75209	4930527L09Rik|AI841971
chr7	67735041	67735880	diffreps_peak_00129965	6.22354	839	NM_201639	Synm	2.04569	5.97664e-07	2.11679e-05	down	233335	4930412K21Rik|AI852401|Dmn|E130104F11|Syn|Synemin
chr8	87472061	87472592	diffreps_peak_00141151	6.52489	531	NM_019626	Cbln1	3.01006	2.98616e-07	1.23426e-05	down	12404	AI323299
chr7	47133255	47133560	diffreps_peak_00128754	11.9869	305	NM_013643	Ptpn5	5.06822	1.03061e-12	3.3e-09	down	19259	Step
chr9	79819441	79819940	diffreps_peak_00150220	5.61449	499	NM_001081243	Filip1	2.05242	2.42944e-06	6.43073e-05	down	70598	5730485H21Rik|AI843021
chr3	89755341	89755700	diffreps_peak_00090603	6.31116	359	NM_009602	Chrnb2	2.90414	4.88472e-07	1.80076e-05	down	11444	Acrb-2|Acrb2|C030030P04Rik|[b]2-nAchR
chr10	70187690	70188080	diffreps_peak_00012913	9.05974	390	ENSMUST00000135607	Ccdc6	3.26902	8.71482e-10	1.93609e-07	down	76551	2810012H18Rik|AA536681|AA960498|AW061011
chr7	99317471	99317820	diffreps_peak_00131780	6.80247	349	NM_001048167	Map6	2.23107	1.5759e-07	7.46175e-06	down	17760	2810411E12Rik|Map-6|Mtap6|STOP
chr2	136100901	136101228	diffreps_peak_00082907	11.3829	327	NM_172858	Pak7	3.20714	4.14111e-12	6.6512e-09	down	241656	2900083L08Rik|6430627N20|Pak5
chr13	54738301	54739000	diffreps_peak_00037575	6.97295	699	NM_012014	Gprin1	2.24328	1.06427e-07	5.50119e-06	down	26913	GRIN1|Z16
chr10	79865441	79866000	diffreps_peak_00013860	5.11912	559	NM_181681	Lppr3	2.00552	7.60122e-06	0.000160969	down	NA	NA
chr7	56716464	56716860	diffreps_peak_00129136	6.2242	396	ENSMUST00000068911	Gabrg3	10.0327	5.96763e-07	2.1147e-05	down	14407	B230362M20Rik|Gabrg-3
chrX	136201121	136201813	diffreps_peak_00156266	5.28769	692	NM_177919	Tceal5	2.08746	5.15602e-06	0.000117427	down	331532	6430401A05Rik
chr3	89314421	89315000	diffreps_peak_00090480	6.42779	579	ENSMUST00000029673	Efna3	2.29073	3.73428e-07	1.46404e-05	down	13638	AW494418|EFL-2|Ehk1-L|Epl3|LERK-3
chr2	55597501	55597820	diffreps_peak_00078752	6.2608	319	NM_008426	Kcnj3	3.42742	5.48524e-07	1.9818e-05	down	16519	GIRK-1|GIRK1|Kcnf3|Kir3.1
chr11	82445121	82445500	diffreps_peak_00023888	5.15064	379	NM_023438	Tmem132e	7.25468	7.06904e-06	0.000151737	down	270893	Gm644
chr18	77458761	77459140	diffreps_peak_00069998	6.17405	379	NM_001164504	Rnf165	2.6987	6.69806e-07	2.31324e-05	down	225743	2900024M11Rik|AI427432|Akd2|Ark2c|G630064H08Rik|Gm96
chr10	79864780	79865280	diffreps_peak_00013859	5.09009	500	NM_181681	Lppr3	2.54576	8.12657e-06	0.000168815	down	NA	NA
chr11	6125121	6125520	diffreps_peak_00018223	6.67397	399	uc007hya.2	Nudcd3	2.04456	2.1185e-07	9.41323e-06	down	209586	AI427847|BC024322|mKIAA1068
chr19	32675457	32675820	diffreps_peak_00072933	5.28086	363	uc008hfp.1	Atad1	10.9114	5.23771e-06	0.000118989	down	67979	4921525H23Rik|AW107648|Thorase
chr1	72536121	72536520	diffreps_peak_00003178	9.34946	399	NM_001045533	2022-03-04	2.10908	4.47239e-10	1.17653e-07	down	381270	BC056494|mKIAA1399
chr3	94775921	94776236	diffreps_peak_00090863	5.08829	315	uc008qha.2	Cgn	3.02952	8.16044e-06	0.000169351	down	70737	6330408J11Rik
chr19	6464741	6465260	diffreps_peak_00071350	6.6703	519	uc008git.2	Nrxn2	4.01285	2.13649e-07	9.46032e-06	down	18190	6430591O13Rik|mKIAA0921
chr7	140070361	140070664	diffreps_peak_00135165	5.93972	303	NM_026769	Caly	2.29934	1.1489e-06	3.54205e-05	down	68566	0710001P07Rik|1110004A22Rik|Calcyon|Drd1ip
chr13	83662306	83662700	diffreps_peak_00038780	5.88124	394	NM_001170537	Mef2c	2.2237	1.31451e-06	3.94926e-05	down	17260	5430401D19Rik|9930028G15Rik|AV011172|Mef2
chrX	93675101	93675420	diffreps_peak_00155273	7.50315	319	ENSMUST00000045898	Pcyt1b	2.92854	3.1394e-08	2.25901e-06	down	236899	AW045697|CTTbeta
chr11	5520741	5521080	diffreps_peak_00018096	6.65651	339	NM_013842	Xbp1	2.16446	2.2054e-07	9.71299e-06	down	22433	D11Ertd39e|TREB-5|TREB5|XBP-1
chr4	137299161	137299560	diffreps_peak_00102368	5.36363	399	ENSMUST00000045747	Wnt4	61.9	4.3288e-06	0.00010225	down	22417	Wnt-4
chr4	120134721	120135080	diffreps_peak_00099895	9.98443	359	NM_010657	Hivep3	2.6773	1.03651e-10	4.04882e-08	down	16656	2900056N03Rik|A130075N07|AI848000|E030045D18Rik|KBP-1|KBP1|Krc|Rc|Schnurri-3|Shn3|Zas3
chr11	120615321	120615740	diffreps_peak_00028744	6.53655	419	uc029rqf.1	Pcyt2	2.23982	2.90704e-07	1.20912e-05	down	68671	1110033E03Rik|ET
chr11	76020641	76021020	diffreps_peak_00022974	6.76245	379	NM_029658	Fam101b	3.43648	1.72804e-07	8.00455e-06	down	76566	1500005K14Rik|RefilinB|cfm
chr13	16026401	16026900	diffreps_peak_00035704	6.42237	499	NM_008380	Inhba	3.35057	3.78118e-07	1.47922e-05	down	16323	-
chr2	55437341	55437900	diffreps_peak_00078744	10.6787	559	NM_008426	Kcnj3	2.67146	2.09536e-11	1.42184e-08	down	16519	GIRK-1|GIRK1|Kcnf3|Kir3.1
chrX	20860510	20861609	diffreps_peak_00153852	5.98023	1099	NM_013680	Syn1	2.06313	1.04657e-06	3.28225e-05	down	20964	Syn-1|Syn1-S
chr9	56620321	56620820	diffreps_peak_00148400	6.09958	499	NM_181074	Lingo1	2.02511	7.951e-07	2.6291e-05	down	235402	4930471K13Rik|AV148400|LERN1|LINGO-1|Lrrn6a|UNQ201
chr3	18056181	18056580	diffreps_peak_00087402	5.83378	399	NM_021560	Bhlhe22	2.30282	1.46629e-06	4.31605e-05	down	59058	Beta3|Bhlhb5
chr6	135714861	135715180	diffreps_peak_00123662	6.75027	319	ENSMUST00000053880	Grin2b	2.79424	1.77719e-07	8.1878e-06	down	14812	AW490526|GluN2B|NR2B|Nmdar2b
chr9	59717721	59718040	diffreps_peak_00148788	8.50441	319	ENSMUST00000128944	Gramd2	5.64532	3.13036e-09	4.71009e-07	down	546134	BC064463
chr11	42133481	42133790	diffreps_peak_00019714	6.42232	309	NM_010250	Gabra1	3.16378	3.78165e-07	1.47922e-05	down	14394	Gabra-1
chr7	105610481	105611000	diffreps_peak_00132360	6.06205	519	ENSMUST00000057525	Trim3	2.01579	8.66863e-07	2.81818e-05	down	55992	BERP1|HAC1|Rnf22
chr15	99497521	99498120	diffreps_peak_00052283	6.2008	599	NM_028224	Faim2	3.17007	6.29802e-07	2.20697e-05	down	72393	2900002L20Rik|Lfg|Lfg2|NMP25|Nmp35|Tmbim2
chr16	42248761	42249114	diffreps_peak_00056302	6.75431	353	NM_008083	Gap43	2.44152	1.76072e-07	8.12105e-06	down	14432	B-50|Basp2|GAP-43
chr6	126708328	126708707	diffreps_peak_00123245	5.88028	379	NM_013568	Kcna6	2.44475	1.31742e-06	3.95451e-05	down	16494	Kv1.6|MK1.6
chr1	56794641	56795120	diffreps_peak_00002296	6.1667	479	NM_139146	Satb2	2.22877	6.81241e-07	2.33219e-05	down	212712	mKIAA1034

## Sheet: Down-OGDR3h_vs_Control
Chromosome	Transcript start	Transcript end	Peak ID	Score	Peak length	Transcript ID	Gene name	Fold change	P value	FDR	Regulation	Gene ID	Synonyms
chr10	41070821	41071180	diffreps_peak_00010931	11.0853	359	NM_199058	Gpr6	12.7273	8.21593e-12	4.74753e-09	down	140741	AI852874|Gm233
chr2	168260901	168261240	diffreps_peak_00081421	11.5824	339	ENSMUST00000109191	Kcng1	12.9244	2.61576e-12	2.30358e-09	down	241794	AW536275|OTTMUSG00000016048
chr7	47133255	47133560	diffreps_peak_00122149	12.0239	305	NM_013643	Ptpn5	6.82979	9.46561e-13	1.45574e-09	down	19259	Step
chr1	56796921	56797244	diffreps_peak_00002189	6.50076	323	NM_139146	Satb2	2.38393	3.15672e-07	8.53998e-06	down	212712	mKIAA1034
chrX	135208901	135209570	diffreps_peak_00148230	5.68742	669	NM_025355	Tceal6	2.03085	2.05392e-06	3.9797e-05	down	66104	1500026B10Rik
chr1	75509641	75509980	diffreps_peak_00003306	6.40725	339	NM_010564	Inha	3.56472	3.91515e-07	1.01441e-05	down	16322	AW555078
chr3	136670065	136670901	diffreps_peak_00088357	5.30038	836	NM_008913	Ppp3ca	2.05759	5.00749e-06	8.41761e-05	down	19055	2900074D19Rik|CN|Caln|Calna|CnA
chrX	44367881	44368340	diffreps_peak_00146272	7.39122	459	ENSMUST00000115057	Dcaf12l2	5.90029	4.06234e-08	1.78898e-06	down	245403	A130007F10Rik|Wdr40c
chr11	53186281	53186740	diffreps_peak_00019243	9.10247	459	NM_177059	Fstl4	6.6689	7.89825e-10	1.1819e-07	down	320027	B230374F23Rik|SPIG1|mKIAA1061
chr7	127019601	127020355	diffreps_peak_00127341	5.83917	754	NM_001102563	Prrt2	2.04575	1.44819e-06	2.96654e-05	down	69017	1500031I19Rik|AI195361|DSPB3
chr17	34632083	34632760	diffreps_peak_00058590	7.7819	677	ENSMUST00000015620	Prrt1	2.61381	1.65233e-08	9.5321e-07	down	260297	Bat-4|Bat4|D17H6S54E|DSPD1|G5b|NG5|ORF31
chr11	69555881	69556269	diffreps_peak_00020779	6.59343	388	NM_007911	Efnb3	2.01303	2.55017e-07	7.22554e-06	down	13643	EFL-6|ELF-3|Elk-L3|Epl8|LERK-8|NLERK-2
chr14	99298841	99299160	diffreps_peak_00042758	8.93502	319	NM_009769	Klf5	2.2672	1.1614e-09	1.56743e-07	down	12224	4930520J07Rik|Bteb2|CKLF|IKLF
chr11	35798081	35798680	diffreps_peak_00018394	6.28945	599	NM_001004147	Fbll1	2.69646	5.13507e-07	1.25944e-05	down	237730	AI595406
chr13	57435821	57436172	diffreps_peak_00035835	6.42412	351	uc007qte.2	Spock1	2.76199	3.76596e-07	9.84823e-06	down	20745	Spock|Ticn1|testican
chr2	25180757	25181080	diffreps_peak_00072224	8.92261	323	NM_025980	Nrarp	125.3	1.19507e-09	1.59766e-07	down	67122	2700054M22Rik
chr19	8837961	8838271	diffreps_peak_00068020	7.07796	310	NM_010316	Gng3	2.10153	8.35674e-08	3.04092e-06	down	14704	-
chr2	27110761	27111320	diffreps_peak_00072524	5.3989	559	NM_175427	Fam163b	2.10683	3.9912e-06	6.94092e-05	down	109349	C630035N08Rik
chr13	57428041	57428460	diffreps_peak_00035830	9.20337	419	NM_009262	Spock1	2.1012	6.26085e-10	9.93742e-08	down	20745	Spock|Ticn1|testican
chr11	94541141	94541480	diffreps_peak_00023293	10.2328	339	NM_001013381	Rsad1	112.6	5.85107e-11	1.65587e-08	down	237926	B430319G23|BC056485
chr7	18963101	18963500	diffreps_peak_00119210	6.83263	399	NM_001029877	Nova2	3.08451	1.47019e-07	4.66007e-06	down	384569	Gm1424
chr8	120153921	120154260	diffreps_peak_00136197	6.4329	339	NM_001163762	6430548M08Rik	2.40797	3.69062e-07	9.69659e-06	down	234797	AW049007|Kiaa0513|mKIAA0513
chr7	45699842	45700339	diffreps_peak_00121885	5.64001	497	ENSMUST00000003360	Car11	3.38248	2.29083e-06	4.37086e-05	down	12348	Ca11
chr9	22017361	22017880	diffreps_peak_00138250	5.50693	519	NM_010487	Elavl3	2.18979	3.11222e-06	5.64594e-05	down	15571	2600009P04Rik|Huc|PLE21|mHuC
chr15	99527579	99527880	diffreps_peak_00049522	6.6035	301	NM_028224	Faim2	4.18458	2.49174e-07	7.08226e-06	down	72393	2900002L20Rik|Lfg|Lfg2|NMP25|Nmp35|Tmbim2
chr8	45381661	45382020	diffreps_peak_00131245	6.0096	359	NM_153535	Fam149a	10.5738	9.78143e-07	2.13604e-05	down	212326	AW213256|mKIAA4166
chr2	118792101	118792460	diffreps_peak_00077248	6.60845	359	NM_170593	Disp2	2.51715	2.46349e-07	7.01702e-06	down	214240	AI840597|B230210L08Rik|DispB|mKIAA1742
chr18	68254008	68254380	diffreps_peak_00065738	6.58071	372	NM_172631	Ldlrad4	2.43843	2.62598e-07	7.36879e-06	down	52662	8230401C20Rik|A430083H02|A430108L08Rik|C18orf1|D18Ertd653e|D330030L18Rik
chr1	75216201	75216593	diffreps_peak_00003207	7.19373	392	NM_009447	Tuba4a	2.89269	6.40139e-08	2.48286e-06	down	22145	M[a]4|Tuba4
chr17	34630632	34631060	diffreps_peak_00058588	7.28842	428	NM_030890	Prrt1	2.55503	5.14736e-08	2.12882e-06	down	260297	Bat-4|Bat4|D17H6S54E|DSPD1|G5b|NG5|ORF31
chr3	96185101	96185600	diffreps_peak_00086468	5.3393	499	NM_022030	Sv2a	3.17594	4.5783e-06	7.80191e-05	down	64051	AI746429|mKIAA0736
chr9	49506852	49507653	diffreps_peak_00140401	6.03575	801	NM_001113204	Ncam1	2.39591	9.20971e-07	2.03626e-05	down	17967	CD56|E-NCAM|NCAM-1|Ncam
chr5	98275210	98275520	diffreps_peak_00104377	6.21809	310	NM_010203	Fgf5	8.09709	6.05221e-07	1.43677e-05	down	14176	Fgf-5|HBGF-5|angora|go
chr2	158610761	158611160	diffreps_peak_00080387	7.09417	399	NM_009508	Slc32a1	2.10371	8.05064e-08	2.96709e-06	down	22348	R75019|VGAT|Viaat
chr2	36083161	36083600	diffreps_peak_00073855	6.32997	439	NM_008500	Lhx6	5.11588	4.67764e-07	1.1701e-05	down	16874	Lhx6.1
chr9	37552536	37552900	diffreps_peak_00139268	5.97905	364	ENSMUST00000065668	Nrgn	2.63349	1.04942e-06	2.26743e-05	down	64011	0710001B06Rik|AI838505|NG|NG/RC3|Pss1|R75334|RC3
chr1	37624901	37625280	diffreps_peak_00001387	7.84803	379	NM_028096	2010300C02Rik	6.05093	1.41895e-08	8.59307e-07	down	72097	-
chr2	169633421	169633779	diffreps_peak_00081478	5.71064	358	ENSMUST00000109159	Tshz2	2.15665	1.94699e-06	3.80296e-05	down	228911	2900073F20Rik|B830045G17|Mtsh2|Sdccag33l|Tsh2|Zfp218|mKIAA4248|teashirt2
chr11	83419361	83419900	diffreps_peak_00022543	6.50653	539	NM_001013386	Rasl10b	2.16287	3.11508e-07	8.44617e-06	down	276952	B230331P10Rik|Gm729|VTS58635
chr11	120615321	120615740	diffreps_peak_00026927	10.8076	419	uc029rqf.1	Pcyt2	3.07254	1.55754e-11	6.72504e-09	down	68671	1110033E03Rik|ET
chr1	75247040	75247500	diffreps_peak_00003223	6.25211	460	NM_008985	Ptprn	2.61431	5.5961e-07	1.35179e-05	down	19275	IA-2|mIA-A|mKIAA4064
chr18	43393061	43393377	diffreps_peak_00064500	6.68421	316	NM_009468	Dpysl3	2.17314	2.06914e-07	6.1233e-06	down	22240	CRMP-4|DRP-3|TUC4|ULIP-1|Ulip|Ulip1
chr13	10360481	10360803	diffreps_peak_00033586	6.94412	322	NM_033269	Chrm3	2.48023	1.13732e-07	3.81974e-06	down	12671	Chrm-3|M3|M3R
chr13	57429141	57429485	diffreps_peak_00035832	5.31057	344	NM_009262	Spock1	2.89969	4.89132e-06	8.26152e-05	down	20745	Spock|Ticn1|testican
chr13	14192021	14192440	diffreps_peak_00033740	6.21334	419	uc007pnb.1	Arid4b	3.08525	6.11867e-07	1.4496e-05	down	94246	BCAA|BRCAA1|RBBP1L1|Rbp1l1|SAP180
chr14	55116121	55116620	diffreps_peak_00041022	7.06597	499	NM_177049	Jph4	2.4751	8.59074e-08	3.09935e-06	down	319984	9330157P13Rik|JP-4|JPHL1
chr8	14831321	14831758	diffreps_peak_00129924	6.10299	437	uc009kyz.1	Dlgap2	2.29171	7.88884e-07	1.79133e-05	down	244310	6430596N04Rik|DAP2|Sapap2
chr9	44048221	44048579	diffreps_peak_00139643	6.71316	358	NM_009382	Thy1	2.43161	1.93573e-07	5.81604e-06	down	21838	CD90|T25|Thy-1|Thy-1.2|Thy1.1|Thy1.2
chr18	33184841	33185280	diffreps_peak_00063504	5.20532	439	NM_009793	Camk4	2.18453	6.23269e-06	0.000101171	down	12326	A430110E23Rik|AI666733|CaMKIV|CaMKIV/Gr|D18Bwg0362e
chr12	111828981	111829340	diffreps_peak_00032791	6.83736	359	NM_011625	Ppp1r13b	2.35876	1.45425e-07	4.61765e-06	down	21981	AI449786|ASPP1|AW545810|Tp53bp2|Trp53bp2|p85
chr10	81461901	81462240	diffreps_peak_00013693	8.89491	339	NM_176954	Celf5	3.18107	1.27376e-09	1.68469e-07	down	319586	4930565A21Rik|Brunol5
chr12	105490901	105491220	diffreps_peak_00032175	5.91991	319	NM_001252508	D430019H16Rik	2.01457	1.20252e-06	2.53555e-05	down	268595	AI852661
chr8	87472221	87472592	diffreps_peak_00134022	6.80249	371	NM_019626	Cbln1	3.24168	1.57582e-07	4.9148e-06	down	12404	AI323299
chr13	99425181	99425680	diffreps_peak_00037405	5.23518	499	NM_008634	Map1b	2.25215	5.81866e-06	9.52998e-05	down	17755	A230055D22|AI843217|LC1|MAP5|Mtap-5|Mtap1b|Mtap5
chr12	102562597	102563073	diffreps_peak_00031993	5.09124	476	NM_007693	Chga	2.82216	8.10519e-06	0.000126884	down	12652	ChrA|cgA
chr7	67735241	67735840	diffreps_peak_00123326	6.36723	599	NM_201639	Synm	2.41958	4.29311e-07	1.09013e-05	down	233335	4930412K21Rik|AI852401|Dmn|E130104F11|Syn|Synemin
chr3	89755341	89755760	diffreps_peak_00085893	6.50449	419	NM_009602	Chrnb2	4.28392	3.12976e-07	8.47761e-06	down	11444	Acrb-2|Acrb2|C030030P04Rik|[b]2-nAchR
chr4	133497627	133498020	diffreps_peak_00096660	6.50425	393	NM_001081156	Trnp1	2.59338	3.13145e-07	8.48014e-06	down	69539	2300002D11Rik|Trnp
chr12	71309883	71310307	diffreps_peak_00029755	6.61689	424	NM_021532	Dact1	2.35414	2.41606e-07	6.90474e-06	down	59036	4921528D17Rik|AI115603|DAPPER|DAPPER1|FRODO|Frd1|Frodo1|MDpr1|MTNG3|THYEX3
chr5	118169781	118170128	diffreps_peak_00106434	6.87903	347	NM_007545	Hrk	2.50487	1.3212e-07	4.30291e-06	down	12123	AI838259|Bid3|DP5|harakiri
chr2	136115961	136116300	diffreps_peak_00078661	8.60006	339	uc008moj.1	Pak7	5.54432	2.51153e-09	2.73991e-07	down	241656	2900083L08Rik|6430627N20|Pak5
chr17	25809084	25809386	diffreps_peak_00057215	5.93037	302	NM_001164225	Fbxl16	2.25969	1.17391e-06	2.48712e-05	down	214931	BC042620|Scirr1
chr7	144284384	144284700	diffreps_peak_00128732	6.71605	316	NM_001081370	Shank2	3.72659	1.92285e-07	5.78524e-06	down	210274	ProSAP1|mKIAA1022
chr7	108950361	108950771	diffreps_peak_00125787	5.97377	410	uc009jdd.1	Tub	2.42433	1.06225e-06	2.29217e-05	down	22141	rd5|tub
chr13	83662306	83662620	diffreps_peak_00036783	6.02212	314	NM_001170537	Mef2c	2.49089	9.50332e-07	2.08306e-05	down	17260	5430401D19Rik|9930028G15Rik|AV011172|Mef2
chr14	99301421	99301880	diffreps_peak_00042761	6.35967	459	NM_009769	Klf5	2.10226	4.36852e-07	1.10701e-05	down	12224	4930520J07Rik|Bteb2|CKLF|IKLF
chr1	134332289	134332660	diffreps_peak_00005858	8.46124	371	NM_001144855	Ppfia4	2.8776	3.45746e-09	3.32273e-07	down	68507	100042382|1110008G13Rik|AI448359|AI852265|C81506|Gm3812
chr11	30891721	30892060	diffreps_peak_00018044	6.03465	339	NM_175490	Gpr75	69.1	9.23323e-07	2.03643e-05	down	237716	-
chr16	96161441	96161760	diffreps_peak_00055409	6.41529	319	uc008acs.1	Lca5l	97.3	3.84333e-07	1.00024e-05	down	385668	4921526F01Rik|Lcca5l
chr1	74856021	74856420	diffreps_peak_00003173	7.29059	399	NM_009872	Cdk5r2	2.82694	5.12163e-08	2.12216e-06	down	12570	B230310J22Rik|p39
chr11	6600501	6600840	diffreps_peak_00017200	11.0017	339	NM_001081652	Nacad	2.87739	9.9599e-12	5.09884e-09	down	192950	D230024G13Rik|mKIAA0363
chr3	89314361	89314780	diffreps_peak_00085781	5.22152	419	ENSMUST00000029673	Efna3	2.93466	6.00461e-06	9.79016e-05	down	13638	AW494418|EFL-2|Ehk1-L|Epl3|LERK-3
chr7	45793123	45793460	diffreps_peak_00121917	5.85501	337	NM_001005511	Lmtk3	2.34601	1.39633e-06	2.87544e-05	down	381983	BC059845|aatyk3
chr6	55679261	55679671	diffreps_peak_00113040	5.32042	410	NM_009717	Neurod6	2.48793	4.78169e-06	8.10396e-05	down	11922	Atoh2|Math-2|Math2|Nex|Nex1m|bHLHa2
chr19	59075454	59075800	diffreps_peak_00070902	7.59341	346	NM_175172	4930506M07Rik	2.01254	2.55031e-08	1.2793e-06	down	NA	NA
chr13	54738241	54738740	diffreps_peak_00035620	9.29228	499	NM_012014	Gprin1	2.34087	5.10171e-10	8.48397e-08	down	26913	GRIN1|Z16
chr11	42000241	42000580	diffreps_peak_00018631	5.90271	339	NM_008073	Gabrg2	2.3227	1.2511e-06	2.62377e-05	down	14406	GABAA-R|Gabrg-2|gamma2
chr7	51622341	51622720	diffreps_peak_00122383	9.53347	379	NM_080853	Slc17a6	3.30582	2.9277e-10	5.5003e-08	down	140919	2900073D12Rik|DNPI|VGLUT2
chr10	127092241	127092820	diffreps_peak_00016173	7.22118	579	NM_001033263	Agap2	2.78599	6.00929e-08	2.36979e-06	down	216439	AGAP-2|Centg1|PIKE|cnt-g1|mKIAA0167
chr5	108519761	108520326	diffreps_peak_00105057	5.3573	565	NM_007756	Cplx1	2.62699	4.39242e-06	7.52912e-05	down	12889	921-S
chr1	154471337	154471651	diffreps_peak_00006545	5.90637	314	NM_009782	Cacna1e	2.34051	1.2406e-06	2.60533e-05	down	12290	A430040I15|BII|Cach6|Cacnl1a6|Cav2.3|Cchra1|alpha1E
chr17	34823992	34824324	diffreps_peak_00058612	5.58245	332	NM_019442	Stk19	2.35591	2.61546e-06	4.86393e-05	down	54402	G11|RP1
chr11	67687981	67688420	diffreps_peak_00020471	6.18913	439	NM_008088	Gas7	3.79546	6.46956e-07	1.51769e-05	down	14457	AW124766|B230343A10Rik|Gas7-cb
chr1	72536121	72536500	diffreps_peak_00003003	10.5086	379	NM_001045533	2022-03-04	2.27975	3.10009e-11	1.05134e-08	down	381270	BC056494|mKIAA1399
chr11	75770921	75771580	diffreps_peak_00021639	6.35427	659	NM_007873	Doc2b	4.00068	4.42318e-07	1.11858e-05	down	13447	-
chr10	60134221	60135198	diffreps_peak_00011768	6.90164	977	ENSMUST00000121820	Spock2	2.42378	1.25418e-07	4.12669e-06	down	94214	AA407235|Gcap26|mKIAA0275
chr7	3330145	3330460	diffreps_peak_00118121	6.21983	315	NM_011102	Prkcg	2.80805	6.02792e-07	1.43186e-05	down	18752	PKCgamma|Pkcc|Prkcc
chr11	116986161	116986640	diffreps_peak_00026122	6.22998	479	NM_172948	Mgat5b	2.2062	5.88876e-07	1.4052e-05	down	268510	C330018B01|GnT-IX|mGnTVB
chr2	181390981	181391468	diffreps_peak_00082398	5.87097	487	NM_027656	Zbtb46	2.00915	1.34594e-06	2.7876e-05	down	72147	2610019F01Rik|4933406L05Rik|BZEL|Btbd4
chr9	56620281	56620820	diffreps_peak_00140839	6.28048	539	NM_181074	Lingo1	2.19966	5.24223e-07	1.28112e-05	down	235402	4930471K13Rik|AV148400|LERN1|LINGO-1|Lrrn6a|UNQ201
chr5	37245763	37246096	diffreps_peak_00102178	6.50839	333	NM_007765	Crmp1	2.28241	3.10178e-07	8.41357e-06	down	12933	CRMP-1|DRP-1|Dpysl1|ULIP-3|Ulip3
chr6	113842131	113842645	diffreps_peak_00115801	5.08558	514	NM_009723	Atp2b2	2.33243	8.21154e-06	0.000128387	down	11941	D6Abb2e|Gena300|PMCA2|Tmy|dfw|jog|wms|wri
chr2	120700701	120701020	diffreps_peak_00077489	5.86617	319	ENSMUST00000140843	Stard9	88.6	1.36092e-06	2.81187e-05	down	668880	4831403C07Rik|E230025N21Rik|Kif16a|mKIAA1300
chr9	108107381	108107760	diffreps_peak_00144104	6.17311	379	NM_007567	Bsn	2.04561	6.71261e-07	1.56619e-05	down	12217	-
chr17	27710221	27710860	diffreps_peak_00057572	6.65661	639	NM_011861	Pacsin1	4.15128	2.2049e-07	6.42624e-06	down	23969	A830061D09Rik|H74|mKIAA1379|syndapin
chr6	13839641	13839942	diffreps_peak_00110786	7.6401	301	ENSMUST00000060442	Gpr85	2.45088	2.29033e-08	1.18545e-06	down	64450	2900026B03Rik
chr8	105281561	105281880	diffreps_peak_00134827	5.18759	319	NM_028888	4931428F04Rik	2.41116	6.49249e-06	0.000104723	down	74356	AI426165|Kiaa0895l
chr9	111366121	111366720	diffreps_peak_00144603	5.32152	599	NM_001164659	Trank1	2.03543	4.76963e-06	8.08904e-05	down	320429	A230061D21Rik|C030048J01Rik|Gm187|Lba1
chr13	54749569	54749874	diffreps_peak_00035625	6.08637	305	ENSMUST00000135343	Gprin1	2.87342	8.19649e-07	1.84723e-05	down	26913	GRIN1|Z16
chr9	86806481	86806800	diffreps_peak_00142827	7.06754	319	uc029xfe.2	Snap91	2.52545	8.55974e-08	3.09305e-06	down	20616	91kDa|AP180|F1-20|mKIAA0656
chr7	47132277	47132717	diffreps_peak_00122148	7.46753	440	ENSMUST00000033142	Ptpn5	2.08692	3.4078e-08	1.58e-06	down	19259	Step
chr10	128128101	128128480	diffreps_peak_00016424	11.7434	379	NM_054078	Baz2a	11.7184	1.80565e-12	1.96828e-09	down	116848	AA415431|C030005G16Rik|C78388|Tip5|Walp3|mKIAA0314
chrX	20860661	20861609	diffreps_peak_00145972	5.18784	948	NM_013680	Syn1	2.09965	6.48867e-06	0.000104676	down	20964	Syn-1|Syn1-S
chr7	126829241	126830120	diffreps_peak_00127257	6.00989	879	NM_026884	Fam57b	2.11731	9.77487e-07	2.13527e-05	down	68952	1500016O10Rik|A330104J06Rik|AI413816|AW060769
chr2	180499975	180500480	diffreps_peak_00082257	6.17696	505	NM_018766	Ntsr1	2.7692	6.65337e-07	1.55419e-05	down	18216	NT-1R|NTR-1|NTR1
chr11	53188041	53188380	diffreps_peak_00019245	6.71283	339	ENSMUST00000036796	Fstl4	4.72291	1.93718e-07	5.81894e-06	down	320027	B230374F23Rik|SPIG1|mKIAA1061
chr5	121859481	121859860	diffreps_peak_00106791	6.99667	379	ENSMUST00000111752	Cux2	2.12763	1.0077e-07	3.48899e-06	down	13048	1700051K22Rik|Cutl2|Cux-2|ENSMUSG00000072641
chr9	22018321	22018740	diffreps_peak_00138251	5.95363	419	NM_010487	Elavl3	2.25543	1.11269e-06	2.37645e-05	down	15571	2600009P04Rik|Huc|PLE21|mHuC
chr15	79108971	79109280	diffreps_peak_00047247	6.07605	309	ENSMUST00000040320	Micall1	2.46766	8.39366e-07	1.88514e-05	down	27008	AI448246|D15Mit260|D15N2e|EST573322|EST820961|MIRab13|mKIAA1668
chr11	116343547	116343920	diffreps_peak_00026016	7.92719	373	uc007mkz.1	Rnf157	14.8879	1.18252e-08	7.64928e-07	down	217340	2610036E23Rik|A130073L17Rik|mKIAA1917
chr7	34675821	34676320	diffreps_peak_00120993	9.25348	499	uc009gji.1	Chst8	4.16979	5.57856e-10	9.05681e-08	down	68947	1500011J21Rik|AI426009
chr5	117955081	117955680	diffreps_peak_00106400	6.88888	599	ENSMUST00000142742	Nos1	3.05626	1.29158e-07	4.22278e-06	down	18125	2310005C01Rik|N-NOS|NC-NOS|NO|NOS|NOS-I|Nos-1|bNOS|nNOS
chr1	136177361	136177700	diffreps_peak_00006070	10.3942	339	NM_001039472	Kif21b	2.23876	4.03458e-11	1.27052e-08	down	16565	2610511N21Rik|mKIAA0449
chr13	112700228	112700580	diffreps_peak_00038029	8.14105	352	uc007rwp.1	Slc38a9	7.80905	7.22687e-09	5.54643e-07	down	268706	4833412L08Rik|6720411P22Rik|9130023D20Rik|9430067K09Rik|A730092C09
chr16	42291901	42292366	diffreps_peak_00053371	5.01939	465	NM_008083	Gap43	2.12905	9.56342e-06	0.000146521	down	14432	B-50|Basp2|GAP-43
chr12	108361513	108362160	diffreps_peak_00032314	7.42297	647	NM_010010	Cyp46a1	2.24615	3.776e-08	1.69678e-06	down	13116	Cyp46
chr10	74990861	74991240	diffreps_peak_00012543	10.2684	379	uc007fpu.1	Gnaz	2.15477	5.3905e-11	1.56808e-08	down	14687	AI847979|Gz
chr9	111392501	111392820	diffreps_peak_00144610	6.58233	319	NM_001164659	Trank1	2.15703	2.61619e-07	7.35798e-06	down	320429	A230061D21Rik|C030048J01Rik|Gm187|Lba1
chr5	117774001	117774960	diffreps_peak_00106388	5.34843	959	ENSMUST00000180430	Ksr2	3.20997	4.48296e-06	7.66248e-05	down	333050	-
chr1	127677430	127677740	diffreps_peak_00005292	11.4674	310	NM_028135	Tmem163	3.53512	3.40912e-12	2.70537e-09	down	72160	2610024A01Rik|SV31
chr15	75566941	75567255	diffreps_peak_00046645	6.47612	314	ENSMUST00000127095	Ly6h	2.63412	3.34101e-07	8.93543e-06	down	23934	-
chr17	25820101	25820480	diffreps_peak_00057227	7.97312	379	NM_001164225	Fbxl16	2.28887	1.06384e-08	7.14723e-07	down	214931	BC042620|Scirr1
chrX	111659781	111660240	diffreps_peak_00147999	7.46064	459	NM_001080549	Hdx	11.2127	3.46226e-08	1.59927e-06	down	245596	D030011N01Rik|Gm380
chr15	77995001	77995360	diffreps_peak_00047061	6.42445	359	NM_007583	Cacng2	2.41467	3.76313e-07	9.84278e-06	down	12300	AW060990|B230105C07Rik|B930041E13Rik|stargazer|stargazin|stg|wag|waggler
chr10	28465757	28466060	diffreps_peak_00010402	8.24587	303	NM_008983	Ptprk	2.1379	5.6772e-09	4.71063e-07	down	19272	AI853699|PTPk|RPTPkappa
chr11	81151941	81152400	diffreps_peak_00022382	6.245	459	NM_007384	Asic2	2.91667	5.68857e-07	1.36813e-05	down	11418	ACIC2|Accn1|BNC1|BNaC1|BNaC1a|Mdeg
chr2	55437341	55437900	diffreps_peak_00074620	7.1095	559	NM_008426	Kcnj3	3.03814	7.77133e-08	2.89426e-06	down	16519	GIRK-1|GIRK1|Kcnf3|Kir3.1
chr17	57080261	57080740	diffreps_peak_00060409	5.26049	479	NM_009451	Tubb4a	2.61179	5.48916e-06	9.08111e-05	down	22153	AI325297|M(beta)4|Tubb|Tubb4
chr9	20873661	20874280	diffreps_peak_00137881	7.01852	619	NM_175687	A230050P20Rik	2.0612	9.5825e-08	3.36761e-06	down	319278	RyDEN
chr5	30622861	30623180	diffreps_peak_00101210	12.5955	319	NM_010608	Kcnk3	21.6512	2.53811e-13	8.98318e-10	down	16527	TASK|Task-1|cTBAK-1
chr2	119269201	119269900	diffreps_peak_00077309	6.04492	699	NM_145530	Rhov	4.06778	9.01736e-07	1.99863e-05	down	228543	A030005A06Rik|Arhv
chr11	4941081	4941400	diffreps_peak_00016920	8.12565	319	NM_010904	Nefh	3.91898	7.48773e-09	5.69596e-07	down	380684	NF-H|NF200|Nfh|mKIAA0845
chr5	35280421	35280920	diffreps_peak_00101820	7.2152	499	NM_007418	Adra2c	3.98264	6.09251e-08	2.39537e-06	down	11553	Adra-2c|[a]2C|alpha2-C4|alpha2C
chr15	98806141	98807200	diffreps_peak_00049341	5.53335	1059	NM_001013741	Ddn	2.21831	2.92854e-06	5.3573e-05	down	13199	Gm748
chr17	25820541	25820960	diffreps_peak_00057228	6.24291	419	NM_001164225	Fbxl16	2.41076	5.71597e-07	1.37255e-05	down	214931	BC042620|Scirr1
chr7	24978321	24978660	diffreps_peak_00119680	6.18797	339	uc009fre.1	Atp1a3	2.68055	6.48676e-07	1.5209e-05	down	232975	Atpa-2
chr9	45126381	45126980	diffreps_peak_00139885	6.78515	599	NM_001014761	Scn2b	4.40977	1.64001e-07	5.07353e-06	down	72821	2810451E09Rik|AI840361|Gm183
chr6	127768672	127769120	diffreps_peak_00117099	5.92015	448	NM_201371	Prmt8	2.02692	1.20186e-06	2.53463e-05	down	381813	Hrmt1l3|Hrmt1l4
chr11	103650181	103650580	diffreps_peak_00024674	6.81317	399	NM_001033212	Rprml	9.59949	1.53754e-07	4.82421e-06	down	104582	AW049332
chr11	61448961	61449877	diffreps_peak_00020095	5.95444	916	NM_009548	Rnf112	2.89726	1.1106e-06	2.37254e-05	down	22671	ZNF179|Zfp179|bfp
chr5	114611141	114611460	diffreps_peak_00105901	5.54466	319	NM_001004180	Fam222a	4.84454	2.85324e-06	5.23935e-05	down	433940	-
chr10	49495437	49495760	diffreps_peak_00011283	7.58674	323	uc007fai.1	Grik2	25.3478	2.58979e-08	1.29287e-06	down	14806	AW124492|GluK2|Glur-6|Glur6|Glurbeta2
chr11	36007561	36007900	diffreps_peak_00018464	6.29297	339	NM_011856	Tenm2	2.59191	5.09362e-07	1.25097e-05	down	23964	Odz2|Odz3|Ten-2|Ten-m2
chr8	9207321	9207700	diffreps_peak_00129130	6.95172	379	NM_173446	Fam155a	6.7351	1.11759e-07	3.7714e-06	down	270028	6430500D16|AW121567|Tmem28
chr4	99194001	99194452	diffreps_peak_00093237	6.91715	451	NM_175029	Atg4c	4.0411	1.21017e-07	4.00481e-06	down	242557	Apg4-C|Apg4c|Atg4cl|Autl1
chr9	8972021	8972420	diffreps_peak_00137380	6.48022	399	ENSMUST00000104915	Gm16485	97.6	3.30965e-07	8.87145e-06	down	791396	ENSMUSG00000022845
chr4	120095181	120095800	diffreps_peak_00094858	8.84285	619	NM_010657	Hivep3	2.08324	1.43598e-09	1.84512e-07	down	16656	2900056N03Rik|A130075N07|AI848000|E030045D18Rik|KBP-1|KBP1|Krc|Rc|Schnurri-3|Shn3|Zas3
chr4	127194921	127195500	diffreps_peak_00095644	6.08063	579	NM_198618	Dlgap3	2.19883	8.30558e-07	1.86842e-05	down	242667	BC058433|DAP-3|DAP3|Prpl8|Sapap3
chr10	77900301	77900640	diffreps_peak_00012879	5.50245	339	NM_145152	Lrrc3	2.49262	3.14447e-06	5.69546e-05	down	237387	1300011L04Rik|C21orf102
chr16	42248801	42249114	diffreps_peak_00053361	7.33222	313	NM_008083	Gap43	2.77121	4.65351e-08	1.97544e-06	down	14432	B-50|Basp2|GAP-43
chr7	27531999	27532340	diffreps_peak_00120187	7.69969	341	ENSMUST00000117095	Pld3	2.30727	1.9967e-08	1.08209e-06	down	18807	Sam-9
chr15	76667341	76667700	diffreps_peak_00046904	7.10504	359	NM_010630	Kifc2	2.23363	7.85162e-08	2.91506e-06	down	16581	-
chr1	43033601	43033940	diffreps_peak_00001749	7.11315	339	NM_053107	Gpr45	13.8362	7.70643e-08	2.87927e-06	down	93690	9230112G11Rik|AW046772
chr7	16945381	16945740	diffreps_peak_00119126	5.72782	359	NM_001099636	Pnmal2	2.14411	1.87147e-06	3.67827e-05	down	434128	EG434128
chr17	46443081	46443440	diffreps_peak_00059391	7.56311	359	NM_001162864	Ttbk1	2.20673	2.73458e-08	1.34553e-06	down	106763	AU017937|AW048023|C330008L01Rik
chr1	127490781	127491120	diffreps_peak_00005283	7.28383	339	NM_028135	Tmem163	10.6495	5.20198e-08	2.14414e-06	down	72160	2610024A01Rik|SV31
chr2	163454661	163455020	diffreps_peak_00080738	11.1332	359	NM_144891	Gdap1l1	4.72577	7.35933e-12	4.46493e-09	down	228858	Gdap1l
chr10	60132781	60133300	diffreps_peak_00011767	5.13898	519	NM_052994	Spock2	2.30455	7.26133e-06	0.000115367	down	94214	AA407235|Gcap26|mKIAA0275
chr7	67733121	67733740	diffreps_peak_00123324	6.30748	619	NM_201639	Synm	2.16424	4.92633e-07	1.21712e-05	down	233335	4930412K21Rik|AI852401|Dmn|E130104F11|Syn|Synemin
chr7	101421690	101421995	diffreps_peak_00125421	7.5168	305	NM_001008548	Pde2a	2.64303	3.04232e-08	1.45544e-06	down	207728	CGS-PDE|cGSPDE
chr6	135715641	135716280	diffreps_peak_00117385	5.05655	639	ENSMUST00000053880	Grin2b	3.06443	8.77918e-06	0.000136146	down	14812	AW490526|GluN2B|NR2B|Nmdar2b
chr6	142963941	142964452	diffreps_peak_00117758	6.46506	511	NM_011374	St8sia1	3.05693	3.42722e-07	9.12908e-06	down	20449	9330109E03Rik|GD3S|Sia-T|Siat8|Siat8a
chr1	135435141	135435560	diffreps_peak_00005965	5.94778	419	NM_173437	Nav1	2.05837	1.12778e-06	2.40531e-05	down	215690	9530089B19|9930003A20Rik|C230080M11Rik|Pomfil3|Unc53h1|mKIAA1151|steerin-1
chr1	56871361	56871784	diffreps_peak_00002199	8.76881	423	NM_139146	Satb2	2.0024	1.70291e-09	2.0932e-07	down	212712	mKIAA1034
chr7	126950534	126951116	diffreps_peak_00127308	8.59232	582	NM_144926	Sez6l2	2.37433	2.55668e-09	2.77324e-07	down	233878	AI835913|AW121566|BSRP-A|Psk1
chr7	47078261	47078740	diffreps_peak_00122135	6.40565	479	NM_013643	Ptpn5	2.59248	3.92958e-07	1.01735e-05	down	19259	Step
chr19	6401501	6401860	diffreps_peak_00067613	5.81173	359	ENSMUST00000113472	Rasgrp2	3.04986	1.54267e-06	3.12778e-05	down	19395	CDC25L|Caldaggef1
chr14	96518481	96518820	diffreps_peak_00042710	5.06101	339	NM_053105	Klhl1	69.9	8.68942e-06	0.000134891	down	93688	mKIAA1490
chr19	5729881	5730200	diffreps_peak_00067456	7.92814	319	uc008gez.1	Fam89b	9.25773	1.17994e-08	7.63505e-07	down	17826	1110021A21Rik|MMTV|Mtvr2
chr1	56795321	56795700	diffreps_peak_00002187	6.84508	379	NM_139146	Satb2	2.51327	1.42862e-07	4.55669e-06	down	212712	mKIAA1034
chr10	79864780	79865260	diffreps_peak_00013107	5.10497	480	NM_181681	Lppr3	2.58314	7.85284e-06	0.000123597	down	NA	NA
chr11	76571061	76571500	diffreps_peak_00021731	5.85846	439	ENSMUST00000072740	Abr	2.23334	1.38529e-06	2.85508e-05	down	109934	-
chr18	37955421	37956420	diffreps_peak_00064111	5.77115	999	ENSMUST00000176104	Rell2	2.20264	1.69376e-06	3.38841e-05	down	225392	4631403P03Rik|ependolin
chr8	87469841	87470320	diffreps_peak_00134021	7.02583	479	NM_019626	Cbln1	2.29196	9.42254e-08	3.32626e-06	down	12404	AI323299
chr10	123264481	123265280	diffreps_peak_00016017	5.96539	799	NM_182807	Fam19a2	2.0787	1.08296e-06	2.32951e-05	down	268354	6330575M02|FAM19A2 TAFA-2|TAFA2|Tafa-2
chr18	33193941	33194420	diffreps_peak_00063505	5.78404	479	NM_009793	Camk4	2.31307	1.64421e-06	3.30394e-05	down	12326	A430110E23Rik|AI666733|CaMKIV|CaMKIV/Gr|D18Bwg0362e
chr11	97511141	97511860	diffreps_peak_00023697	6.44043	719	NM_018873	Srcin1	2.43129	3.62723e-07	9.5655e-06	down	56013	P140|SNIP|mKIAA1684|p140Cap
chrX	93675101	93675420	diffreps_peak_00147327	7.39868	319	ENSMUST00000045898	Pcyt1b	2.6644	3.99317e-08	1.76715e-06	down	236899	AW045697|CTTbeta
chr11	70018465	70018949	diffreps_peak_00020998	6.0179	484	ENSMUST00000108588	Dlg4	2.00429	9.59632e-07	2.10067e-05	down	13385	Dlgh4|PSD-95|PSD95|SAP90|SAP90A
chr11	115410881	115411260	diffreps_peak_00025759	5.34333	379	ENSMUST00000106539	Ict1	6	4.53597e-06	7.74508e-05	down	68572	1110001A02Rik|1110002E03Rik|MRP-L58
chr3	37643301	37643700	diffreps_peak_00083771	5.3802	399	NM_011896	Spry1	4.33616	4.16679e-06	7.19146e-05	down	24063	sprouty1|spry-1
chr15	98804761	98805620	diffreps_peak_00049340	7.29117	859	NM_001013741	Ddn	2.73352	5.11479e-08	2.11984e-06	down	13199	Gm748
chr2	164968081	164968454	diffreps_peak_00080941	10.4761	373	NM_020333	Slc12a5	2.33328	3.34153e-11	1.10736e-08	down	57138	KCC2|mKIAA1176
chr1	75427901	75428240	diffreps_peak_00003261	5.49904	339	NM_007463	Speg	4.10363	3.1693e-06	5.71344e-05	down	11790	AW125581|Apeg1|BPEG|D1Bwg1450e|SPEGalpha|SPEGbeta|mKIAA1297
chr7	3693374	3693820	diffreps_peak_00118228	5.27716	446	ENSMUST00000108630	Tsen34	2.08621	5.28246e-06	8.82228e-05	down	66078	0610027F08Rik|Leng5
chr7	16960501	16960980	diffreps_peak_00119131	5.91603	479	NM_001007569	Pnmal1	2.89766	1.2133e-06	2.55421e-05	down	71691	0710005I19Rik
chr17	24639761	24640220	diffreps_peak_00056992	6.38253	459	NM_023055	Slc9a3r2	2.22559	4.14452e-07	1.05931e-05	down	65962	0610011L07Rik|1200011K07Rik|2010007A20Rik|E3karp|NHERF-2|Nherf2|Octs2|Sip-1|Sip1|Sryip1|Tka-1
chr12	109032741	109033120	diffreps_peak_00032436	6.53574	379	NM_001163175	Begain	2.90132	2.91247e-07	7.99076e-06	down	380785	BM948371|Gm897
chr7	44603461	44604000	diffreps_peak_00121518	5.87888	539	NM_008422	Kcnc3	3.37122	1.32166e-06	2.74791e-05	down	16504	KShIIID|Kcr2-3|Kv3.3
chr2	136100901	136101228	diffreps_peak_00078659	11.3329	327	NM_172858	Pak7	3.6427	4.6467e-12	3.3401e-09	down	241656	2900083L08Rik|6430627N20|Pak5
chr6	135732281	135732760	diffreps_peak_00117388	5.56922	479	NM_008171	Grin2b	2.13147	2.6964e-06	4.99668e-05	down	14812	AW490526|GluN2B|NR2B|Nmdar2b
chr11	101274974	101275520	diffreps_peak_00024326	5.67091	546	NM_175638	Wnk4	3.09845	2.13347e-06	4.11614e-05	down	69847	2010002J11Rik|Pha2b|Prkwnk4
chr14	31374881	31375201	diffreps_peak_00039884	5.97277	320	NM_011894	Sh3bp5	2.06224	1.06471e-06	2.29698e-05	down	24056	AI606498|SH3BP-5|Sab
chr19	10450501	10450840	diffreps_peak_00068226	6.53042	339	NM_018801	Syt7	4.55475	2.94837e-07	8.07139e-06	down	54525	AI851541|B230112P13Rik
chr9	89603001	89603360	diffreps_peak_00142926	6.26239	359	NM_153509	AF529169	6.92473	5.46525e-07	1.3255e-05	down	209743	DD1|Kiaa1024
chr5	100078061	100078840	diffreps_peak_00104477	7.58838	779	NM_182841	Tmem150c	3.71117	2.58002e-08	1.28963e-06	down	231503	-
chr6	71707560	71707960	diffreps_peak_00113419	5.59378	400	ENSMUST00000121469	Reep1	3.24819	2.54815e-06	4.76064e-05	down	52250	D6Ertd253e
chrX	159414571	159414892	diffreps_peak_00149030	6.2932	321	ENSMUST00000112471	Map7d2	2.17163	5.09094e-07	1.25062e-05	down	78283	1600028E09Rik|2900002G04Rik|5330432J06Rik|C030036K04Rik|Mtap7d2
chr4	120131721	120132060	diffreps_peak_00094875	11.9348	339	NM_010657	Hivep3	3.61428	1.16189e-12	1.53709e-09	down	16656	2900056N03Rik|A130075N07|AI848000|E030045D18Rik|KBP-1|KBP1|Krc|Rc|Schnurri-3|Shn3|Zas3
chr12	85139141	85139480	diffreps_peak_00030970	5.90601	339	NM_146244	Rps6kl1	3.37823	1.24163e-06	2.60665e-05	down	238323	A830084F09Rik|AW046440
chr13	14316481	14317140	diffreps_peak_00033757	5.72978	659	NM_001081348	Hecw1	2.08014	1.86304e-06	3.66351e-05	down	94253	9330116H24Rik|AV273951|E130207I19Rik|Nedl1
chr7	99317471	99317860	diffreps_peak_00125086	6.8882	389	NM_001048167	Map6	2.29684	1.2936e-07	4.22802e-06	down	17760	2810411E12Rik|Map-6|Mtap6|STOP
chr15	12592080	12592380	diffreps_peak_00044255	7.3609	300	NM_001081064	Pdzd2	2.06468	4.35608e-08	1.8824e-06	down	68070	4930537L06Rik|A930022H17Rik|Gm21706|Gm82|Pdzk3|mKIAA0300
chr7	100227393	100227780	diffreps_peak_00125222	6.11951	387	ENSMUST00000084935	Pgm2l1	2.24578	7.59426e-07	1.73496e-05	down	70974	4931406N15Rik|AI553438|BM32A
chr3	92081061	92082000	diffreps_peak_00086064	5.98013	939	NM_008508	Lor	3.13714	1.0468e-06	2.26253e-05	down	16939	AI036317|S77319
chr4	120267261	120267800	diffreps_peak_00094882	8.688	539	NM_194060	Foxo6	2.36458	2.05115e-09	2.38669e-07	down	329934	-
chr1	162477761	162478120	diffreps_peak_00007186	7.54973	359	ENSMUST00000159707	Gm10176	2.09526	2.82012e-08	1.37467e-06	down	100049562	ENSMUSG00000066752
chr13	16026481	16026880	diffreps_peak_00033816	5.60575	399	NM_008380	Inhba	3.19768	2.47887e-06	4.64608e-05	down	16323	-
chr10	79735101	79735460	diffreps_peak_00013053	6.67504	359	NM_008226	Hcn2	2.51806	2.11328e-07	6.23153e-06	down	15166	BCNG2|HAC1|trls
chr9	56635074	56635628	diffreps_peak_00140843	5.58611	554	ENSMUST00000114256	Lingo1	2.51413	2.59349e-06	4.83125e-05	down	235402	4930471K13Rik|AV148400|LERN1|LINGO-1|Lrrn6a|UNQ201
chr18	67477921	67478280	diffreps_peak_00065640	6.2664	359	uc008fmj.1	Slmo1	3.0366	5.41501e-07	1.31573e-05	down	225655	A230074A19Rik|BC019561|Prelid3a
chr4	126753061	126753429	diffreps_peak_00095558	6.75614	368	NM_011986	Ncdn	2.12945	1.75333e-07	5.36297e-06	down	26562	AU042419|MMS10-AE|Ms10ae|mKIAA0607|norbin
chr2	168268468	168269331	diffreps_peak_00081425	6.56745	863	NM_001081134	Kcng1	2.87415	2.70739e-07	7.5386e-06	down	241794	AW536275|OTTMUSG00000016048
chr19	10858081	10859000	diffreps_peak_00068277	5.60077	919	NM_133804	Tmem132a	2.85438	2.50745e-06	4.69301e-05	down	98170	6720481D13Rik|Hspa5bp1|Orai1|R74613
chr12	78963461	78964120	diffreps_peak_00030218	6.02472	659	NM_178745	Tmem229b	2.51636	9.44673e-07	2.07318e-05	down	268567	6330442E10Rik|9830138K24|AU019070
chr11	42133441	42133790	diffreps_peak_00018632	6.41176	349	NM_010250	Gabra1	3.15297	3.87475e-07	1.00526e-05	down	14394	Gabra-1
chr11	11114015	11114380	diffreps_peak_00017283	8.35792	365	NM_177033	Vwc2	154.6	4.38613e-09	3.90387e-07	down	319922	A930041G11Rik|G11|PSST739|UNQ739|cradin
chr5	113939381	113939700	diffreps_peak_00105783	10.6017	319	ENSMUST00000159592	Ssh1	10.7633	2.50226e-11	9.21018e-09	down	231637	AW551225|Gm1394|Gm1395|SSH-1|mSSH-1L
chr2	157944221	157944560	diffreps_peak_00080327	6.60248	339	NM_198627	Vstm2l	3.8531	2.49757e-07	7.09678e-06	down	277432	Gm691
chr2	92599706	92600148	diffreps_peak_00076254	7.39592	442	NM_023850	Chst1	2.78433	4.01864e-08	1.77597e-06	down	76969	2610008E20Rik|AW125896|C6ST|GST-1|Gst1|KSGAL6ST
chr2	58822041	58822400	diffreps_peak_00074704	5.26311	359	NM_001001178	Ccdc148	7.45578	5.45624e-06	9.03191e-05	down	227933	5830402J09
chr7	45803631	45804020	diffreps_peak_00121934	6.14319	389	NM_001005511	Lmtk3	2.17371	7.19132e-07	1.65972e-05	down	381983	BC059845|aatyk3
chr11	98837101	98837673	diffreps_peak_00024040	5.09192	572	NM_001080925	Rapgefl1	2.04314	8.09237e-06	0.000126744	down	268480	B230105J10
chr12	12939621	12940000	diffreps_peak_00027627	5.79331	379	NM_008709	Mycn	2.03341	1.60951e-06	3.24309e-05	down	18109	N-myc|Nmyc|Nmyc-1|Nmyc1|bHLHe37|c-nmyc
chr8	3604361	3605076	diffreps_peak_00128932	5.04503	715	NM_027171	Camsap3	2.25776	9.01509e-06	0.000139445	down	69697	2310057J16Rik|Kiaa1543|Nezha
chr6	135724721	135725080	diffreps_peak_00117386	9.64088	359	ENSMUST00000053880	Grin2b	2.5271	2.28623e-10	4.51597e-08	down	14812	AW490526|GluN2B|NR2B|Nmdar2b
chr15	83791938	83792258	diffreps_peak_00048022	8.68468	320	ENSMUST00000172115	Mpped1	2.52844	2.06691e-09	2.40363e-07	down	223726	6230403M19|AW456965|D15Bwg0669e
chr11	50122321	50122840	diffreps_peak_00018945	5.53702	519	NM_001290750	Rnf130	2.46674	2.90388e-06	5.32135e-05	down	59044	2510042A13Rik|G1RZFP|G1rp|GOLIATH|GP
chr10	61580281	61580600	diffreps_peak_00011850	5.2906	319	NM_153542	Lrrc20	3.21855	5.12152e-06	8.5831e-05	down	216011	BC036304
chr9	28921041	28921440	diffreps_peak_00138581	7.48324	399	NM_177906	Opcml	2.89085	3.28668e-08	1.54138e-06	down	330908	2900075O15Rik|3732419F12|AI844366|B930023M13Rik|C230027C17|Gm181|Obcam
chr15	99497521	99498120	diffreps_peak_00049517	7.11252	599	NM_028224	Faim2	5.41513	7.71758e-08	2.88127e-06	down	72393	2900002L20Rik|Lfg|Lfg2|NMP25|Nmp35|Tmbim2
chr2	169885401	169885760	diffreps_peak_00081513	6.70761	359	NM_080455	Tshz2	2.70004	1.9606e-07	5.8721e-06	down	228911	2900073F20Rik|B830045G17|Mtsh2|Sdccag33l|Tsh2|Zfp218|mKIAA4248|teashirt2
chr8	106264841	106265160	diffreps_peak_00135095	6.14714	319	NM_021491	Smpd3	2.50577	7.12624e-07	1.64681e-05	down	58994	4631433G07Rik|AI427456|AW537966|fro|nSMase2
chr8	31089541	31089895	diffreps_peak_00130752	5.36192	354	ENSMUST00000036631	Dusp26	2.6289	4.34586e-06	7.45833e-05	down	66959	2310043K02Rik|Skrp3
chr6	37806581	37806900	diffreps_peak_00111967	6.26204	319	uc009bjh.1	Atp6v0c	11.0136	5.46967e-07	1.32609e-05	down	11984	Atp6c|Atp6c2|Atp6l|Atpl|Atpl-rs1|PL16|VATL|Vma3
chr3	107500421	107500740	diffreps_peak_00087291	6.42926	319	NM_172271	Slc6a17	2.34217	3.72173e-07	9.7628e-06	down	229706	D130012J15Rik|Ntt4
chr14	99301921	99302254	diffreps_peak_00042762	6.17555	333	NM_009769	Klf5	2.28183	6.67492e-07	1.55831e-05	down	12224	4930520J07Rik|Bteb2|CKLF|IKLF
chr3	18056101	18056560	diffreps_peak_00082844	5.59531	459	NM_021560	Bhlhe22	2.21106	2.53915e-06	4.7474e-05	down	59058	Beta3|Bhlhb5
chr9	44302409	44302720	diffreps_peak_00139693	5.31904	311	uc009pcs.2	Hinfp	2.52899	4.79685e-06	8.12757e-05	down	102423	AA589481|HiNF-P|Mizf
chr11	75795520	75796057	diffreps_peak_00021645	6.16042	537	NM_007873	Doc2b	2.08481	6.91159e-07	1.60581e-05	down	13447	-
chr5	146833321	146833720	diffreps_peak_00110080	5.1909	399	ENSMUST00000099272	Rpl21	2.07199	6.44316e-06	0.000104088	down	19933	8430440E03Rik|L21
chr19	6497827	6498300	diffreps_peak_00067680	5.81073	473	ENSMUST00000113458	Nrxn2	2.04825	1.54623e-06	3.13307e-05	down	18190	6430591O13Rik|mKIAA0921
chr11	28583741	28584200	diffreps_peak_00017855	6.14562	459	NM_181577	Ccdc85a	2.30536	7.15125e-07	1.65163e-05	down	216613	-
chr10	43021121	43021460	diffreps_peak_00011097	5.7864	339	NM_175407	Sobp	2.74691	1.6353e-06	3.28904e-05	down	109205	2900009C16Rik|5330439J01Rik|JXC1|jc
chr2	53133761	53134140	diffreps_peak_00074568	6.87794	379	NM_172409	Fmnl2	7.71795	1.32454e-07	4.3113e-06	down	71409	5430425K04Rik|Man
chr14	55113701	55114080	diffreps_peak_00041019	5.83326	379	NM_177049	Jph4	2.49684	1.46805e-06	3.00134e-05	down	319984	9330157P13Rik|JP-4|JPHL1
chr15	89523760	89524219	diffreps_peak_00048661	7.33239	459	uc033gwe.1	Shank3	2.27929	4.6517e-08	1.97538e-06	down	58234	AI841104|SHANK3c-3|SHANK3c-4|Shank3b

## Sheet: Up-OGDR1.5h_vs_Control
Chromosome	Transcript start	Transcript end	Peak ID	Score	Peak length	Transcript ID	Gene name	Fold change	P value	FDR	Regulation	Gene ID	Synonyms
chr3	87975420	87975740	diffreps_peak_00090102	10.0965	320	NM_016701	Nes	2.30155	8.00809e-11	3.38366e-08	up	18008	AA166324|C78523|ESTM46
chr8	108955961	108956620	diffreps_peak_00142447	7.19016	659	NM_007496	Zfhx3	2.11246	6.4542e-08	3.78005e-06	up	11906	A230102L03Rik|Atbf1|Sci|WBP9|mKIAA4228
chr6	48833810	48834139	diffreps_peak_00118660	9.03029	329	NM_001164209	Tmem176b	3.77644	9.32641e-10	2.02433e-07	up	65963	1810009M01Rik|Clast1|Lr8
chr3	98146241	98147300	diffreps_peak_00091471	7.76603	1059	NM_010928	Notch2	2.78698	1.71383e-08	1.46113e-06	up	18129	AI853703|N2
chr11	94558001	94558357	diffreps_peak_00024788	7.12167	356	NM_153807	Acsf2	2.23743	7.55662e-08	4.22987e-06	up	264895	-
chr4	123664465	123664780	diffreps_peak_00100188	7.53867	315	uc008upq.1	Macf1	2.47636	2.89291e-08	2.13403e-06	up	11426	ABP620|Acf7|Aclp7|MACF|R74989|mKIAA0465
chrM	10061	10540	diffreps_peak_00153232	6.2196	479	uc009vfb.1	Gm10222	2.6254	6.03112e-07	2.1332e-05	up	100142658	ENSMUSG00000067736
chr15	25812401	25812740	diffreps_peak_00046828	7.89976	339	NM_019472	Myo10	2.4186	1.25962e-08	1.19636e-06	up	17909	AW048724|D15Ertd600e|mKIAA0799
chr4	129010961	129011380	diffreps_peak_00101135	8.68248	419	NM_016895	Ak2	2.16298	2.07742e-09	3.5447e-07	up	11637	Ak-2|D4Ertd220e
chr17	32122281	32122620	diffreps_peak_00061450	9.69604	339	NM_008716	Notch3	7.48495	2.01353e-10	6.54962e-08	up	18131	AW229011|N3|hpbk
chr5	52741573	52741900	diffreps_peak_00108058	8.07029	327	NM_025951	Pi4k2b	2.65208	8.5056e-09	9.20776e-07	up	67073	2610042N09Rik|4933409G22Rik
chr5	113087381	113087760	diffreps_peak_00111194	6.33022	379	NM_172884	2900026A02Rik	4.15466	4.67495e-07	1.73916e-05	up	243219	8430408O14Rik|A530094D01|AW539426|Gm449|Kiaa1671|mKIAA1671
chr4	123471521	123471880	diffreps_peak_00100153	6.62054	359	NM_001199136	Macf1	2.76255	2.39584e-07	1.04042e-05	up	11426	ABP620|Acf7|Aclp7|MACF|R74989|mKIAA0465
chr6	90599601	90599960	diffreps_peak_00120757	6.05557	359	ENSMUST00000130418	Aldh1l1	4.40341	8.79892e-07	2.85397e-05	up	107747	1810048F20Rik|FDH|Fthfd|Neut2
chr10	103214981	103215440	diffreps_peak_00015839	7.12627	459	NM_029134	Lrriq1	3.33975	7.47697e-08	4.19981e-06	up	74978	4930503E15Rik|Gm1557
chr2	83724401	83724800	diffreps_peak_00079899	9.12614	399	NM_008402	Itgav	2.74903	7.47924e-10	1.71251e-07	up	16410	1110004F14Rik|2610028E01Rik|CD51|D430040G12Rik
chr10	13130441	13131680	diffreps_peak_00010390	10.2817	1239	NM_009538	Plagl1	2.28171	5.22786e-11	2.58253e-08	up	22634	Lot1|Zac1
chr10	128933812	128934140	diffreps_peak_00017650	9.0159	328	NM_008398	Itga7	3.02512	9.64058e-10	2.07018e-07	up	16404	[a]7|alpha7
chr3	90263561	90263960	diffreps_peak_00090706	7.6797	399	NM_028881	Crtc2	4.60073	2.09074e-08	1.68548e-06	up	74343	4632407F12Rik|Torc2|mTORC2
chr11	60712920	60713280	diffreps_peak_00021241	9.05469	360	NM_008502	Llgl1	3.36382	8.81672e-10	1.94487e-07	up	16897	AI325176|Lgl1|Llglh|Mgl1
chr7	112427705	112428100	diffreps_peak_00132816	5.38493	395	NM_020606	Parva	2.08594	4.12166e-06	9.88922e-05	up	57342	2010012A22Rik|5430400F08Rik|AI225929|AU042898|Actp|CH-ILKBP|Parvin
chr7	118489641	118489980	diffreps_peak_00133356	9.18628	339	NM_001033380	Itpripl2	8.23721	6.51203e-10	1.55717e-07	up	319622	C130081G24|E030018N11Rik
chr15	83158561	83158925	diffreps_peak_00050509	6.18663	364	uc007xad.1	Cyb5r3	2.17703	6.5069e-07	2.26198e-05	up	109754	0610016L08Rik|2500002N19Rik|C85115|Dia-1|Dia1|WU:AL591952.1-001|WU:AL591952.1-002|WU:AL591952.1-003|WU:Cyb5r3
chr11	3330641	3331004	diffreps_peak_00017715	6.80865	363	ENSMUST00000045153	Pik3ip1	2.03143	1.55363e-07	7.38015e-06	up	216505	1500004A08Rik|5830455E04Rik|Crkd|Hgfl
chr6	29736261	29736900	diffreps_peak_00117274	11.5709	639	uc009bee.1	AK053708	6.72816	2.68624e-12	5.50483e-09	up	NA	NA
chr19	17119321	17119700	diffreps_peak_00072241	7.358	379	NM_181348	Prune2	5.03516	4.38532e-08	2.86504e-06	up	353211	6330414G02Rik|A230083H22Rik|A330102H22Rik|Bmcc1|mKIAA0367
chr19	59170161	59170540	diffreps_peak_00074808	5.21694	379	ENSMUST00000172821	Vax1	6.44785	6.06823e-06	0.000133657	up	22326	-
chr7	65370809	65371244	diffreps_peak_00129796	9.76078	435	NM_009386	Tjp1	2.43969	1.73469e-10	5.84679e-08	up	21872	ZO1
chr7	81092241	81092700	diffreps_peak_00130701	5.52379	459	NM_054085	Alpk3	3.31505	2.99369e-06	7.64628e-05	up	116904	AW319487|D330016D04|MAK|Midori|mKIAA1330
chr8	45050780	45051280	diffreps_peak_00138178	10.1278	500	NM_001081286	Fat1	2.47582	7.45101e-11	3.23498e-08	up	14107	2310038E12Rik|AU023433|Fath|mFat1
chr8	80879901	80880519	diffreps_peak_00140308	6.64494	618	NM_001301298	Gab1	2.02313	2.26494e-07	9.93254e-06	up	14388	AA408973|AW107238
chr2	79635351	79635744	diffreps_peak_00079802	7.24259	393	ENSMUST00000111785	Ssfa2	2.00759	5.7202e-08	3.47017e-06	up	70599	5730488C15Rik|CS-1|CS1|KRAP|SPAG13|mKIAA1927
chr3	34650004	34650920	diffreps_peak_00088262	7.39412	916	NM_011443	Sox2	2.07796	4.03536e-08	2.71026e-06	up	20674	Sox-2|lcc|ysb
chr1	59483361	59483780	diffreps_peak_00002436	11.4627	419	NM_008057	Fzd7	5.74947	3.44559e-12	6.25431e-09	up	14369	Fz7
chr16	23965181	23965560	diffreps_peak_00054875	6.29209	379	NM_009744	Bcl6	11.0196	5.10394e-07	1.86841e-05	up	12053	Bcl5
chr5	139970977	139971460	diffreps_peak_00115194	7.5807	483	NM_175522	Elfn1	3.40525	2.62604e-08	1.98578e-06	up	243312	A930017N06Rik|AI197272|Ppp1r28
chr3	57457181	57457520	diffreps_peak_00088973	8.69705	339	NM_133784	Wwtr1	3.19199	2.00886e-09	3.45941e-07	up	97064	2310058J06Rik|2610021I22Rik|C78399|Taz
chr1	172368920	172369220	diffreps_peak_00008463	11.6044	300	NM_001039484	Kcnj10	3.44395	2.48678e-12	5.30841e-09	up	16513	BIR10|BIRK-1|Kir1.2|Kir4.1
chr7	142575801	142578146	diffreps_peak_00135462	9.61838	2345	uc012fxn.1	H19	3.28633	2.4078e-10	7.54469e-08	up	14955	AI747191
chr7	16869841	16870160	diffreps_peak_00125396	6.11401	319	NM_178900	Prkd2	6.98182	7.69108e-07	2.56779e-05	up	101540	AI325941|PKD2
chr14	55092007	55092324	diffreps_peak_00043199	5.39081	317	ENSMUST00000036328	Zfhx2	2.12719	4.06624e-06	9.78545e-05	up	239102	ZFH-5
chr7	116134581	116134940	diffreps_peak_00133134	8.32374	359	NM_001305189	Plekha7	3.57176	4.74524e-09	6.17022e-07	up	233765	A430081P20Rik|AI414265
chr9	60871801	60872283	diffreps_peak_00148858	9.05205	482	NM_028283	Uaca	3.16393	8.87061e-10	1.94837e-07	up	72565	2700059D02Rik|nucling
chr11	100571439	100571900	diffreps_peak_00025773	5.54929	461	NM_028918	Ttc25	2.81853	2.82298e-06	7.27496e-05	up	74407	4933404O19Rik
chr7	118984301	118984645	diffreps_peak_00133435	10.8997	344	NM_022420	Gprc5b	2.04402	1.25992e-11	1.07764e-08	up	64297	AW125761|Raig2
chr1	139170901	139171240	diffreps_peak_00006663	6.81635	339	NM_181347	Dennd1b	28.9394	1.52633e-07	7.28594e-06	up	329260	4632404N19Rik|4930467M19Rik|6820401H01Rik|F730008N07Rik
chr15	88913897	88914340	diffreps_peak_00051169	7.72954	443	NM_172818	Ttll8	5.71893	1.86406e-08	1.55663e-06	up	239591	1700019P01Rik|4933401B17
chr7	105745441	105745920	diffreps_peak_00132396	6.86633	479	NM_009906	Tpp1	2.0055	1.36043e-07	6.68333e-06	up	12751	Cln2|LPIC|TPP-1|TPP-I
chr4	98923901	98924243	diffreps_peak_00098097	8.13722	342	NM_146144	Usp1	2.97598	7.29084e-09	8.34593e-07	up	230484	-
chr6	72626370	72626860	diffreps_peak_00119551	6.82759	490	NM_009332	Tcf7l1	2.49409	1.48733e-07	7.14974e-06	up	21415	Tcf-3|Tcf3|bHLHb21
chr10	9674504	9674840	diffreps_peak_00010258	7.17179	336	NM_177271	Samd5	2.14386	6.73303e-08	3.89988e-06	up	320825	E130306M17Rik
chr1	74396161	74396760	diffreps_peak_00003309	11.0968	599	NM_153088	Ctdsp1	3.52314	8.00216e-12	9.32219e-09	up	227292	GIP|NLIIF|Nif3|SCP1
chr12	86077621	86077960	diffreps_peak_00032932	7.2413	339	NM_009368	Tgfb3	3.8302	5.73721e-08	3.47946e-06	up	21809	TGF-beta-3|Tgfb-3
chr1	135324901	135325270	diffreps_peak_00006389	8.87729	369	NM_053106	Lmod1	4.68959	1.32652e-09	2.60882e-07	up	93689	9530015K06Rik|SM-Lmod
chr1	172371041	172371380	diffreps_peak_00008466	5.2892	339	NM_001039484	Kcnj10	3.11574	5.13804e-06	0.000117082	up	16513	BIR10|BIRK-1|Kir1.2|Kir4.1
chr7	4936907	4937220	diffreps_peak_00124725	8.11949	313	NM_173008	Ssc5d	6.90227	7.59474e-09	8.57955e-07	up	269855	A430110N23Rik|S5D-SRCRB
chr9	67049021	67049406	diffreps_peak_00149475	10.5176	385	ENSMUST00000113707	Tpm1	4.0346	3.03697e-11	1.79675e-08	up	22003	AA986836|AI854628|TM2|Tm3|Tmpa|Tpm-1|alpha-TM
chr7	19371281	19371646	diffreps_peak_00125702	5.45737	365	NM_001010836	Ppp1r13l	2.26671	3.48844e-06	8.66307e-05	up	333654	AV260376|IASPP|Nkip1|wa3
chrX	130464141	130464520	diffreps_peak_00156144	7.83166	379	NM_172493	Diap2	12.1176	1.47346e-08	1.30374e-06	up	NA	NA
chr1	73913941	73914620	diffreps_peak_00003219	10.5566	679	NM_027884	Tns1	3.15911	2.77615e-11	1.68316e-08	up	21961	1110018I21Rik|1200014E20Rik|AI648117|E030018G17Rik|E030037J05Rik|Tns
chr16	38601561	38602280	diffreps_peak_00055989	8.74262	719	NM_020260	Arhgap31	2.48508	1.80875e-09	3.21475e-07	up	12549	5830477L08Rik|AU041750|Cdgap|D330026I07Rik
chr8	40918401	40918860	diffreps_peak_00138117	8.7792	459	NM_007514	Slc7a2	2.74587	1.66266e-09	3.03947e-07	up	11988	20.5|AI158848|Atrc2|CAT-2|Cat2|Tea
chr9	58312841	58313212	diffreps_peak_00148620	7.30192	371	NM_010729	Loxl1	3.33546	4.98981e-08	3.13857e-06	up	16949	Loxl
chr5	92941501	92941940	diffreps_peak_00109622	6.02192	439	NM_015756	Shroom3	2.42194	9.50775e-07	3.0319e-05	up	27428	AL022960|D5Ertd287e|Shrm|Shrm3
chr8	89031561	89032080	diffreps_peak_00141271	5.7103	519	NM_021390	Sall1	2.01166	1.94851e-06	5.40115e-05	up	58198	Msal-3
chr12	85933281	85933674	diffreps_peak_00032917	6.17068	393	NM_001081423	Ttll5	3.31943	6.75031e-07	2.32647e-05	up	320244	1700048H13Rik|2310009M18Rik|4930556H18Rik|AI428864|D630041K24Rik|R75373|Stamp|mKIAA0998
chr17	27020241	27020940	diffreps_peak_00060642	7.51634	699	NM_007523	Bak1	2.06715	3.04554e-08	2.21082e-06	up	12018	Bak|N-BAK1|N-Bak
chrX	145450441	145450820	diffreps_peak_00156579	5.65509	379	NM_153319	Amot	2.71965	2.21264e-06	5.99062e-05	up	27494	CAG-2|D0Kist1|Sii6
chr11	102888281	102888721	diffreps_peak_00026186	9.39699	440	NM_010277	Gfap	2.3997	4.0088e-10	1.09708e-07	up	14580	AI836096
chr18	60918261	60918561	diffreps_peak_00068704	6.87118	300	ENSMUST00000040359	Arsi	3.20238	1.3453e-07	6.63188e-06	up	545260	BC020108
chr9	69384021	69384360	diffreps_peak_00149679	8.48173	339	NM_013646	Rora	7.80541	3.29811e-09	4.85556e-07	up	19883	9530021D13Rik|Nr1f1|ROR1|ROR2|ROR3|nmf267|sg|staggerer|tmgc26
chr2	131246363	131246780	diffreps_peak_00082625	8.68497	417	NM_144888	Mavs	3.16333	2.06551e-09	3.5275e-07	up	228607	D430028G21Rik|IPS-1|Visa|cardif
chr11	94951472	94951860	diffreps_peak_00024842	9.42282	388	ENSMUST00000001547	Col1a1	3.518	3.77726e-10	1.05602e-07	up	12842	Col1a-1|Cola-1|Cola1|Mov-13|Mov13
chr16	20173321	20173720	diffreps_peak_00054524	5.35354	399	uc007ypi.2	Yeats2	2.42145	4.4306e-06	0.000104087	up	208146	BC042768|mKIAA1197
chr1	170301021	170301640	diffreps_peak_00008149	8.50062	619	NM_001198955	Gm7694	3.73848	3.15775e-09	4.73725e-07	up	665574	EG665574
chr7	79693721	79694100	diffreps_peak_00130479	5.67714	379	NM_029835	Ticrr	5.18689	2.10311e-06	5.75028e-05	up	77011	5730590G19Rik|BC028450|Lrrk1
chr15	76177701	76178385	diffreps_peak_00049205	10.6571	684	NM_011117	Plec	3.1591	2.20234e-11	1.45587e-08	up	18810	AA591047|AU042537|EBS1|PCN|PLTN|Plec1
chr5	134702881	134703300	diffreps_peak_00114246	7.66553	419	NM_007925	Eln	3.10641	2.1601e-08	1.71708e-06	up	13717	AI385707|AI480567|E030024M20Rik
chr10	13127141	13127480	diffreps_peak_00010387	10.1632	339	NM_009538	Plagl1	2.11753	6.86731e-11	3.09978e-08	up	22634	Lot1|Zac1
chr14	52006301	52006720	diffreps_peak_00042904	7.16609	419	NM_027248	Zfp219	2.40259	6.8219e-08	3.93912e-06	up	69890	2010302A17Rik
chr11	73137201	73137720	diffreps_peak_00022643	7.15755	519	NM_010353	Gsg2	2.12582	6.95748e-08	3.99079e-06	up	14841	Haspin
chr17	34027481	34028160	diffreps_peak_00061801	7.29165	679	uc008cav.1	Slc39a7	2.18738	5.10921e-08	3.2009e-06	up	14977	AA408174|AI117660|AL024048|H-2Ke4|H2-Ke4|Ke-4|Ke4|Ring5|Zip7
chr3	89393034	89393362	diffreps_peak_00090512	12.0312	328	ENSMUST00000029677	Zbtb7b	4.40572	9.30635e-13	3.23446e-09	up	22724	Thpok|Zfp67|c-Krox
chr6	22875501	22875884	diffreps_peak_00117019	7.80019	383	NM_001081306	Ptprz1	2.16268	1.5842e-08	1.37795e-06	up	19283	AI850339|DSD-1-PG|PTPbeta|PTPzeta|Ptprz|Ptpz|R-PTP-zeta|RPTPz|Rptpbeta
chr5	134703401	134703824	diffreps_peak_00114247	6.14794	423	NM_007925	Eln	2.34104	7.11319e-07	2.41219e-05	up	13717	AI385707|AI480567|E030024M20Rik
chr1	69538561	69538920	diffreps_peak_00003092	7.9821	359	NM_011770	Ikzf2	12.8039	1.04208e-08	1.06138e-06	up	22779	A730095J18Rik|Helios|Zfpn1a2|Znfn1a2
chr10	42562181	42562760	diffreps_peak_00011642	7.93001	579	NM_152229	Nr2e1	2.23307	1.17488e-08	1.13945e-06	up	21907	Mtl1|Mtll|TLL|Tlx|XTLL|fierce|frc|tailless
chr5	3344118	3344520	diffreps_peak_00104952	7.95715	402	uc008wgu.1	Cdk6	3.46009	1.10369e-08	1.09954e-06	up	12571	AI504062|Crk2
chr2	17348501	17348840	diffreps_peak_00075743	5.22955	339	NM_028757	Nebl	4.58498	5.89449e-06	0.000130588	up	74103	1200007O21Rik|A630080F05Rik|BB140644|D830029A09Rik|Lnebl
chr7	116158061	116158379	diffreps_peak_00133140	8.38575	318	NM_172743	Plekha7	4.07475	4.11389e-09	5.63534e-07	up	233765	A430081P20Rik|AI414265
chr6	128374861	128375180	diffreps_peak_00123423	9.0296	319	NM_008021	Foxm1	6.88861	9.34104e-10	2.02433e-07	up	14235	AA408308|AW554517|BB238854|Fkh16|Foxm1b|HFH-11B|MPHOSPH2|Mpm2|WIN
chr12	24708751	24709060	diffreps_peak_00029914	10.7383	309	ENSMUST00000153058	Rrm2	3.10513	1.82697e-11	1.29102e-08	up	20135	AA407299|R2
chr10	108332687	108333311	diffreps_peak_00015982	9.23099	624	NM_054056	Pawr	3.25694	5.87503e-10	1.43498e-07	up	114774	2310001G03Rik|PAR4|Par-4
chr1	170299361	170299780	diffreps_peak_00008147	8.15563	419	NM_001198955	Gm7694	6.19788	6.9883e-09	8.09092e-07	up	665574	EG665574
chr1	71029001	71029320	diffreps_peak_00003109	5.00046	319	NM_007525	Bard1	12.875	9.9894e-06	0.000199912	up	12021	ENSMUSG00000060893|ENSMUSG00000073653
chr4	118437001	118437352	diffreps_peak_00099700	6.7831	351	ENSMUST00000006565	Cdc20	2.33908	1.64778e-07	7.71123e-06	up	107995	2310042N09Rik|C87100|p55CDC
chr4	56877361	56877800	diffreps_peak_00096741	11.0327	439	NM_175518	Tmem245	3.2599	9.27507e-12	9.47984e-09	up	242474	A630051L19Rik|AI957324|D730040F13Rik
chr19	28531301	28531700	diffreps_peak_00072693	7.73772	399	NM_175459	Glis3	2.02601	1.82926e-08	1.53389e-06	up	226075	4833409N03Rik|E330013K21Rik
chr6	66896548	66896989	diffreps_peak_00119357	9.73184	441	ENSMUST00000114222	Gng12	2.13759	1.8542e-10	6.15844e-08	up	14701	2010305F15Rik|AA536815|AI115529|AI314170|AI842738
chr7	135697521	135697840	diffreps_peak_00134951	8.48027	319	NM_001081117	Mki67	2.38017	3.30923e-09	4.85879e-07	up	17345	D630048A14Rik|Ki-67|Ki67
chr7	28359881	28360240	diffreps_peak_00126769	8.25944	359	NM_138752	Plekhg2	3.23386	5.50255e-09	6.80519e-07	up	101497	AI194308|Clg|Cslg
chr9	71724561	71724960	diffreps_peak_00149820	5.25034	399	NM_026599	Cgnl1	4.07123	5.61903e-06	0.00012608	up	68178	4933421H10Rik|9930020M10Rik|AI503810|Jacop
chr8	89030921	89031440	diffreps_peak_00141270	6.49218	519	NM_021390	Sall1	2.23564	3.21972e-07	1.30423e-05	up	58198	Msal-3
chr9	58246974	58247360	diffreps_peak_00148611	7.50832	386	NM_008884	Pml	5.29602	3.1023e-08	2.23775e-06	up	18854	1200009E24Rik|AI661194|Trim19
chr13	103833861	103834240	diffreps_peak_00039577	10.7836	379	NM_001005868	Erbb2ip	2.77853	1.64587e-11	1.24919e-08	up	59079	1700028E05Rik|Erbin|mKIAA1225
chr17	25567161	25568081	diffreps_peak_00060306	10.2962	920	NM_011447	Sox8	2.84629	5.056e-11	2.52095e-08	up	20681	-
chr2	91982421	91983007	diffreps_peak_00080288	10.4228	586	NM_011957	Creb3l1	2.09275	3.7773e-11	2.05324e-08	up	26427	Oasis
chr12	80168141	80168480	diffreps_peak_00032155	5.16894	339	NM_134156	Actn1	2.36529	6.77741e-06	0.000146521	up	109711	3110023F10Rik|Actn1a
chr12	112614894	112615520	diffreps_peak_00034738	6.11231	626	NM_198411	Inf2	4.30088	7.7213e-07	2.5762e-05	up	70435	2610204M08Rik|AA589465|AW125550|EG629699
chr13	37946856	37947663	diffreps_peak_00036487	8.08724	807	NM_001177869	Rreb1	2.11575	8.18021e-09	8.993e-07	up	68750	1110037N09Rik|AA414966|B930013M22Rik
chr7	101823892	101824420	diffreps_peak_00132190	7.37325	528	NM_010567	Inppl1	3.48604	4.23396e-08	2.80475e-06	up	16332	51C|SHIP2
chr11	100958581	100959325	diffreps_peak_00025834	8.70061	744	NM_008986	Ptrf	3.01256	1.99247e-09	3.43986e-07	up	19285	2310075E07Rik|AW546441|Cav-p60|Cavin
chr15	58111141	58111520	diffreps_peak_00048196	9.56368	379	uc007vtg.1	Atad2	5.42105	2.73097e-10	8.15815e-08	up	70472	2610509G12Rik
chr4	109981604	109981920	diffreps_peak_00099175	6.92865	316	NM_172296	Dmrta2	5.68884	1.17856e-07	5.96488e-06	up	242620	Dmrt5
chr15	25807735	25808188	diffreps_peak_00046826	7.71659	453	NM_019472	Myo10	2.15661	1.92048e-08	1.59078e-06	up	17909	AW048724|D15Ertd600e|mKIAA0799
chr11	116334321	116335680	diffreps_peak_00027689	9.86525	1359	uc007mkw.1	Foxj1	2.70367	1.36379e-10	4.91174e-08	up	15223	FKHL-13|HFH-4|Hfh4
chr1	184830361	184830700	diffreps_peak_00009335	5.07936	339	uc007dyr.1	2022-03-02	6.16667	8.32984e-06	0.000171922	up	67247	2810484M10Rik|Mosc2|mARC1
chr13	22035201	22035580	diffreps_peak_00035986	8.04795	379	NM_175659	Hist1h2ah	2.79212	8.95469e-09	9.51793e-07	up	319168	-
chr11	121429841	121430220	diffreps_peak_00028900	10.7145	379	NM_181420	Fn3krp	3.76098	1.92975e-11	1.34127e-08	up	238024	FN3K-RP
chr12	86078481	86079041	diffreps_peak_00032934	8.91593	560	NM_009368	Tgfb3	2.59603	1.21357e-09	2.45019e-07	up	21809	TGF-beta-3|Tgfb-3
chr4	82330021	82330426	diffreps_peak_00097670	7.6498	405	uc008tkg.3	Nfib	2.14575	2.23975e-08	1.76503e-06	up	18028	6720429L07Rik|CTF|E030026I10Rik|NF-I/B|NF1-B|NFI-B
chr12	81026807	81027158	diffreps_peak_00032266	10.0187	351	NM_022316	Smoc1	2.56387	9.57754e-11	3.81106e-08	up	64075	2600002F22Rik|AI848508|SRG
chr17	25570301	25570686	diffreps_peak_00060311	10.8487	385	NM_011447	Sox8	3.31962	1.41683e-11	1.13467e-08	up	20681	-
chr10	4353341	4355480	diffreps_peak_00009906	8.63264	2139	NM_031185	Akap12	2.04302	2.33004e-09	3.84142e-07	up	83397	AI317366|SSeCKS|Srcs5|Tsga12
chr18	34863821	34864300	diffreps_peak_00067159	5.2897	479	NM_007913	Egr1	3.03501	5.13221e-06	0.000117027	up	13653	A530045N19Rik|ETR103|Egr-1|Krox-1|Krox-24|Krox24|NGF1-A|NGFI-A|NGFIA|TIS8|Zenk|Zfp-6|Zif268|egr
chrX	58031061	58031560	diffreps_peak_00154451	8.74789	499	NM_009575	Zic3	16.0455	1.78692e-09	3.18425e-07	up	22773	Bn|Ka
chrM	3141	3707	diffreps_peak_00153225	5.30642	566	ENSMUST00000082392	mt-Nd1	2.13839	4.93835e-06	0.000113568	up	NA	NA
chr2	118814002	118814309	diffreps_peak_00081470	6.53998	307	NM_026412	Knstrn	2.963	2.88417e-07	1.20232e-05	up	51944	1700025D04Rik|C15orf23|D2Ertd750e|SKAP|Traf4af1
chr1	45502820	45503280	diffreps_peak_00001982	8.48141	460	NM_007737	Col5a2	3.47475	3.30059e-09	4.85556e-07	up	12832	1110014L14Rik
chr7	28371741	28372060	diffreps_peak_00126777	8.66107	319	NM_001290542	Plekhg2	4.10899	2.1824e-09	3.687e-07	up	101497	AI194308|Clg|Cslg
chr17	84185561	84187120	diffreps_peak_00065115	8.34591	1559	NM_001001806	Zfp36l2	2.81895	4.50908e-09	5.98737e-07	up	12193	Brf2|ERF2|Tis11d
chr17	25471741	25472160	diffreps_peak_00060302	6.46366	419	NM_027951	Tekt4	4.79479	3.43828e-07	1.37215e-05	up	71840	1700010L19Rik
chr9	50763061	50763420	diffreps_peak_00148028	6.45439	359	NM_023483	1110032A03Rik	11.4831	3.51244e-07	1.39225e-05	up	68721	4930500N06Rik|c11orf1
chr8	33929475	33929863	diffreps_peak_00137912	8.40033	388	NM_019733	Rbpms	3.84772	3.97806e-09	5.48595e-07	up	19663	2010300K22Rik|2700019M19Rik|AU017537|RBP-MS|hermes
chr3	89380343	89381340	diffreps_peak_00090509	7.37757	997	NM_009565	Zbtb7b	2.2314	4.19206e-08	2.78556e-06	up	22724	Thpok|Zfp67|c-Krox
chr14	54577021	54577640	diffreps_peak_00043006	10.7707	619	NM_010590	Ajuba	4.36283	1.69536e-11	1.26541e-08	up	16475	Jub
chr14	70180901	70181231	diffreps_peak_00044209	8.75978	330	NM_011366	Sorbs3	4.29601	1.7387e-09	3.13008e-07	up	20410	SCAM-1|SH3P3|Sh3d4|vinexin-g
chr9	32696021	32696465	diffreps_peak_00146380	6.98044	444	ENSMUST00000034534	Ets1	3.30611	1.04608e-07	5.43259e-06	up	23871	AI196000|AI448617|D230050P06|Ets-1|Tpl1|vs
chr7	28362161	28362708	diffreps_peak_00126771	11.0202	547	NM_138752	Plekhg2	2.60492	9.54515e-12	9.47984e-09	up	101497	AI194308|Clg|Cslg
chr9	20783241	20783591	diffreps_peak_00145118	5.81505	350	uc009ojg.1	Col5a3	4.81864	1.53093e-06	4.44367e-05	up	53867	-
chr7	45216981	45217450	diffreps_peak_00128286	6.86764	469	uc009guf.1	Tead2	2.23857	1.35633e-07	6.67182e-06	up	21677	ETF|Etdf|TEAD-2|TEF-4|TEF4
chr6	82557861	82558200	diffreps_peak_00119823	5.08108	339	NM_009313	Tacr1	57.8	8.29703e-06	0.000171332	up	21336	Nk1r|Spr|Tac1r
chr4	40805761	40806140	diffreps_peak_00095401	5.77494	379	NM_022305	B4galt1	5.93304	1.67904e-06	4.78288e-05	up	14595	B-1,4-GalT|B-1,4-GalT1|GalT|Ggtb|Ggtb2|b4Gal-T1|beta-1,4-GalT|beta-1,4-GalT1|beta4Gal-T1
chr7	66262101	66262480	diffreps_peak_00129873	6.23911	379	NM_146191	Lrrk1	4.14789	5.76615e-07	2.06417e-05	up	233328	AW319595|C230002E15Rik|D130026O16Rik|mKIAA1790
chr6	72788709	72789254	diffreps_peak_00119587	9.62178	545	ENSMUST00000069536	Tcf7l1	3.03964	2.38901e-10	7.5068e-08	up	21415	Tcf-3|Tcf3|bHLHb21
chr16	18398021	18398380	diffreps_peak_00054422	7.35587	359	uc007ynp.2	Arvcf	2.68463	4.40682e-08	2.87696e-06	up	11877	-
chr1	64737221	64737620	diffreps_peak_00002782	6.09068	399	NM_022721	Fzd5	5.55102	8.11555e-07	2.67487e-05	up	14367	5330434N09Rik|AI427138|Fz-5|Fz5|mFz5
chr11	112782209	112783015	diffreps_peak_00027086	8.77928	806	NM_011448	Sox9	2.33441	1.66233e-09	3.03947e-07	up	20682	2010306G03Rik|AV220920|mKIAA4243
chr12	75400241	75400620	diffreps_peak_00031817	8.00046	379	NM_023275	Rhoj	12.9871	9.98933e-09	1.02714e-06	up	80837	1110005O19Rik|AW210585|Arhj|TC10L|TCL
chr16	33726421	33727596	diffreps_peak_00055417	6.08812	1175	NM_175256	Heg1	3.16977	8.16359e-07	2.68789e-05	up	77446	4632417D23Rik|5530401I02Rik|9530025L16Rik|BC038614|Gm629|OTTMUSG00000027315
chr18	4920561	4920874	diffreps_peak_00065733	7.22149	313	uc008dyn.2	Svil	3.43695	6.00499e-08	3.57624e-06	up	225115	AU024053|B430302E16Rik
chr3	107760041	107760440	diffreps_peak_00092071	12.3269	399	NM_007778	Csf1	6.59882	4.71088e-13	2.57788e-09	up	12977	C87615|Csfm|MCSF|op
chr4	148164074	148164455	diffreps_peak_00103655	7.18879	381	NM_176848	Fbxo2	2.0426	6.47452e-08	3.78654e-06	up	230904	FBG1|FBX2|Fbs1|Fbs2|NFB42|Prpl4
chr1	134040215	134040880	diffreps_peak_00006248	11.0643	665	NM_021355	Fmod	2.31693	8.62396e-12	9.32219e-09	up	14264	AI131919|AU041740|SLRR2E
chr18	31944521	31945500	diffreps_peak_00066876	10.9608	979	NM_001025381	Gpr17	2.24171	1.09448e-11	1.0103e-08	up	574402	AI853548
chr11	50291941	50292336	diffreps_peak_00020123	8.89611	395	NM_175334	Maml1	4.05688	1.27024e-09	2.53217e-07	up	103806	AI644666|AW743257|D930008C07Rik|Mam-1|Mam1|mKIAA0200
chr4	154341261	154342000	diffreps_peak_00104518	7.77687	739	NM_027504	Prdm16	3.28484	1.67161e-08	1.43389e-06	up	70673	5730557K01Rik|csp1|mel1
chr16	38608902	38609420	diffreps_peak_00055992	8.51151	518	NM_020260	Arhgap31	3.57599	3.07957e-09	4.65403e-07	up	12549	5830477L08Rik|AU041750|Cdgap|D330026I07Rik
chr14	69244101	69244480	diffreps_peak_00044080	5.09928	379	NM_026331	Slc25a37	19.9697	7.95648e-06	0.000166106	up	67712	1700020E22Rik|4930513O14Rik|4930526G11Rik|AI848481|C330015G08Rik|Mfrn|Mfrn1|Mscp|frascati|mitoferrin
chr3	89448672	89449000	diffreps_peak_00090550	10.3129	328	NM_146131	Pbxip1	2.55441	4.8654e-11	2.46795e-08	up	229534	4732463H20Rik
chr14	51988981	51989480	diffreps_peak_00042892	7.01513	499	NM_198249	Arhgef40	2.51631	9.65761e-08	5.10078e-06	up	268739	E130112L23Rik|Gm669|Solo
chr17	21991301	21991640	diffreps_peak_00059858	8.12251	339	ENSMUST00000153985	Zfp943	24.5	7.54214e-09	8.53573e-07	up	74670	4930432O21Rik
chr1	135363669	135364420	diffreps_peak_00006392	7.89661	751	NM_053106	Lmod1	3.00257	1.2688e-08	1.20043e-06	up	93689	9530015K06Rik|SM-Lmod
chr18	13971363	13971720	diffreps_peak_00066108	6.55389	357	uc008edc.1	Zfp521	3.204	2.79327e-07	1.17419e-05	up	225207	B930086A16Rik|Evi3|Znf521
chr5	139973061	139973380	diffreps_peak_00115198	9.41651	319	NM_175522	Elfn1	2.89455	3.83256e-10	1.06739e-07	up	243312	A930017N06Rik|AI197272|Ppp1r28
chr14	57691421	57691770	diffreps_peak_00043428	7.26131	349	NM_015771	Lats2	3.57459	5.47881e-08	3.37011e-06	up	50523	4932411G09Rik|AV277261|AW228608
chr1	133914444	133915420	diffreps_peak_00006244	7.04655	976	NM_054077	Prelp	2.94657	8.98354e-08	4.82182e-06	up	116847	7330409J17Rik|SLRR2A
chr18	36647681	36648100	diffreps_peak_00067405	6.95755	419	NM_175375	Ankhd1	2.4737	1.10269e-07	5.64643e-06	up	108857	1110004O12Rik|4933432B13Rik|9130019P20Rik|A530027J04Rik|A630021B20Rik|AA571404|Mask|mFLJ00246|mKIAA1085
chr12	85475861	85476320	diffreps_peak_00032863	5.1961	459	NM_010234	Fos	2.81785	6.36654e-06	0.000139121	up	14281	D12Rfj1|c-fos|cFos
chr14	69767471	69767791	diffreps_peak_00044158	7.64696	320	NM_020275	Tnfrsf10b	3.88297	2.25445e-08	1.77351e-06	up	21933	DR5|KILLER|Ly98|MK|TRAILR2|TRICK2A|TRICK2B|TRICKB
chr9	13620961	13621320	diffreps_peak_00144783	10.5659	359	NM_001013813	Maml2	2.72502	2.71679e-11	1.65206e-08	up	270118	5930431H10|BC032967
chr14	28505001	28505400	diffreps_peak_00041751	7.40504	399	ENSMUST00000063465	Wnt5a	3.3132	3.93512e-08	2.65879e-06	up	22418	8030457G12Rik|Wnt-5a
chr9	44933101	44933420	diffreps_peak_00147339	7.89783	319	uc009pev.2	Ube4a	3.92265	1.26522e-08	1.1987e-06	up	140630	4732444G18Rik|9930123J21Rik|UFD2b
chr4	154528581	154528931	diffreps_peak_00104559	8.28623	350	NM_027504	Prdm16	3.2544	5.1733e-09	6.48806e-07	up	70673	5730557K01Rik|csp1|mel1
chr7	142653381	142653860	diffreps_peak_00135465	8.73367	479	NM_010514	Igf2	4.29871	1.84641e-09	3.26505e-07	up	16002	AL033362|Igf-2|Igf-II|M6pr|Mpr|Peg2
chr6	128228121	128228479	diffreps_peak_00123399	5.84009	358	NM_011567	Tead4	6.77917	1.44515e-06	4.26546e-05	up	21679	ETFR-2|Etfr2|FR-19|Rtef1|TEAD-4|TEF-3|Tcf13r1|Tef3|Tefr|Tefr1|Tefr1a
chr9	79599721	79600040	diffreps_peak_00150194	6.61736	319	NM_001290308	Col12a1	2.65468	2.41344e-07	1.04629e-05	up	12816	-
chr4	132074901	132075400	diffreps_peak_00101575	5.04867	499	ENSMUST00000094662	Gm10300	2.68758	8.93987e-06	0.000182073	up	100379259	ENSMUSG00000070717
chr11	119027898	119028800	diffreps_peak_00028279	6.6125	902	NM_007623	Cbx2	2.4435	2.44063e-07	1.05584e-05	up	12416	M33|MOD2|pc
chr5	116125181	116125640	diffreps_peak_00111785	7.14662	459	ENSMUST00000050178	Ccdc60	5.08486	7.13474e-08	4.06139e-06	up	269693	AU018954|C130098D09
chr10	83192901	83193220	diffreps_peak_00014772	9.14188	319	NM_021439	Chst11	4.4926	7.21312e-10	1.6646e-07	up	58250	1110020P09Rik|C4ST|C4ST-1|C4ST1|C4s
chr11	112784671	112785620	diffreps_peak_00027088	8.59689	949	NM_011448	Sox9	2.26116	2.52993e-09	4.05356e-07	up	20682	2010306G03Rik|AV220920|mKIAA4243
chr18	84086041	84086400	diffreps_peak_00070395	5.84224	359	NM_001081300	Tshz1	3.18622	1.43799e-06	4.24859e-05	up	110796	5730407I04Rik|D18Bwg1409e|Mtsh1|NY-CO-33|Sdccag33|Tsh1|mKIAA4206|teashirt1
chrX	150569341	150569700	diffreps_peak_00156657	6.66267	359	ENSMUST00000112720	Apex2	11.4412	2.17436e-07	9.60757e-06	up	77622	C430040P13Rik|ape2
chr2	180984231	180984560	diffreps_peak_00086850	5.03173	329	ENSMUST00000094214	9230112E08Rik	4.19289	9.29547e-06	0.000188298	up	320800	-
chr3	34651001	34651580	diffreps_peak_00088263	7.68941	579	NM_011443	Sox2	2.156	2.04453e-08	1.65735e-06	up	20674	Sox-2|lcc|ysb
chr19	25411141	25411540	diffreps_peak_00072492	11.8251	399	NM_181404	Kank1	3.24785	1.49577e-12	3.98082e-09	up	107351	A930031B09Rik|AU015049|AW121052|Ankrd15|D330024H06Rik|mKIAA0172
chr18	35653101	35653420	diffreps_peak_00067217	6.9729	319	NM_001270646	Prob1	80.5	1.06439e-07	5.50119e-06	up	381148	Gm1614
chr4	45013461	45013820	diffreps_peak_00096132	6.67062	359	ENSMUST00000095105	1700055D18Rik	72.6	2.13492e-07	9.45542e-06	up	73405	-
chr4	106748061	106748480	diffreps_peak_00098767	12.1855	419	NM_025590	Acot11	3.84975	6.52424e-13	2.72856e-09	up	329910	1110020M10Rik|2010309H15Rik|AW060409|BFIT|BFIT1|Thea|Them1|mKIAA0707
chr6	128372941	128373560	diffreps_peak_00123421	9.8924	619	NM_008021	Foxm1	2.35261	1.28116e-10	4.68841e-08	up	14235	AA408308|AW554517|BB238854|Fkh16|Foxm1b|HFH-11B|MPHOSPH2|Mpm2|WIN
chr16	36875541	36876020	diffreps_peak_00055845	9.88723	479	ENSMUST00000135406	Golgb1	4.41132	1.2965e-10	4.71914e-08	up	224139	4930428L02Rik|628101|6330407A06Rik|AU042952|C130074L01Rik|F730017E11Rik|Gm6840|mKIAA4151
chr4	63313161	63313479	diffreps_peak_00097116	5.07319	318	uc008tfv.1	Col27a1	3.13613	8.44902e-06	0.000173926	up	373864	5730512J02Rik|AI449266
chr7	141470581	141470980	diffreps_peak_00135325	5.79892	399	NM_009842	Cd151	3.05826	1.58885e-06	4.57558e-05	up	12476	PETA-3|SFA-1|Tspan24
chr14	118235701	118236640	diffreps_peak_00045575	9.37028	939	NM_177753	Sox21	2.34039	4.26307e-10	1.13901e-07	up	223227	Sox25
chr16	57628241	57628817	diffreps_peak_00056848	12.2041	576	NM_007739	Col8a1	4.02733	6.24962e-13	2.72493e-09	up	12837	Col8a-1
chr7	15987478	15987980	diffreps_peak_00125093	6.77955	502	NM_001081418	Gltscr1	2.20383	1.66131e-07	7.75578e-06	up	243842	-
chr12	76109821	76110180	diffreps_peak_00031889	5.65167	359	NM_001005510	Syne2	2.38915	2.23011e-06	6.02757e-05	up	319565	6820443O06Rik|AW546258|Cpfl8|D12Ertd777e|NUA|Nesp2g|dice|mKIAA1011
chr4	100095790	100096240	diffreps_peak_00098157	5.365	450	NM_013845	Ror1	2.27249	4.31516e-06	0.00010225	up	26563	2810404D04Rik|Ntrkr1
chr4	154021721	154022140	diffreps_peak_00104487	6.91152	419	NM_001163721	Smim1	4.32362	1.22597e-07	6.15468e-06	up	68859	0610011H04Rik|1190007F08Rik|2700009I11Rik
chr13	41311861	41312170	diffreps_peak_00036595	8.12329	309	NM_017464	Nedd9	2.97986	7.52848e-09	8.52841e-07	up	18003	Cas-L|CasL|HEF1|MEF1|Nedd-9|p105
chr5	123357741	123358060	diffreps_peak_00112854	5.8761	319	uc008znn.2	Bcl7a	10.0476	1.33014e-06	3.98338e-05	up	77045	4432415N06Rik|AI448316
chr4	118225798	118226100	diffreps_peak_00099608	9.67115	302	NM_011213	Ptprf	2.52126	2.13232e-10	6.85983e-08	up	19268	AA591035|LAR|LARS|RPTP-LAR
chr4	149897901	149898240	diffreps_peak_00103948	7.95272	339	NM_029035	Spsb1	7.2732	1.11501e-08	1.10599e-06	up	74646	1110014L01Rik|4930422J18Rik|AI596360|AI854583|SSB-1|SSB1
chr9	37385801	37386572	diffreps_peak_00146666	8.23688	771	ENSMUST00000051839	Hepacam	2.13011	5.79593e-09	7.05411e-07	up	72927	2900042E01Rik|Glialcam|Hepn1
chr15	74748541	74748880	diffreps_peak_00049083	5.98557	339	NM_011838	Lynx1	2.44441	1.03379e-06	3.25075e-05	up	23936	AI838844|SLURP-2
chr4	135450501	135450860	diffreps_peak_00102113	8.29416	359	NM_028995	Nipal3	3.51369	5.07974e-09	6.40601e-07	up	74552	9130020G22Rik|AI480660|Npal3
chr3	87977681	87980040	diffreps_peak_00090103	6.91035	2359	NM_016701	Nes	2.31586	1.22929e-07	6.16833e-06	up	18008	AA166324|C78523|ESTM46
chr14	55066861	55067240	diffreps_peak_00043158	8.95127	379	NM_001039198	Zfhx2	2.66176	1.11875e-09	2.31345e-07	up	239102	ZFH-5
chr18	80635701	80636076	diffreps_peak_00070238	5.57028	375	NM_198429	Nfatc1	2.95005	2.68982e-06	6.99602e-05	up	18018	2210017P03Rik|AI449492|AV076380|NF-ATc|NFAT2|NFATc|Nfatcb
chr9	53667161	53667511	diffreps_peak_00148172	5.64255	350	ENSMUST00000034529	Cul5	2.07417	2.27744e-06	6.11277e-05	up	75717	4921514I20Rik|8430423K24Rik|AI852817|C030032G03Rik|C330021I08Rik|VACM-1|VACM1
chr11	105988581	105988940	diffreps_peak_00026492	5.09928	359	NM_001281819	Ace	19.9697	7.95648e-06	0.000166106	up	11421	AW208573|CD143
chr19	42147388	42147900	diffreps_peak_00073449	5.53315	512	NM_183195	Marveld1	2.66873	2.92987e-06	7.51578e-05	up	277010	AI504298|Mrvldc1
chr19	34878681	34879440	diffreps_peak_00072999	6.69811	759	NM_001114339	Pank1	2.26076	2.00397e-07	9.00193e-06	up	75735	Pank|Pank1b
chr1	127823181	127823680	diffreps_peak_00005708	8.28229	499	NM_011737	Map3k19	5.72253	5.2205e-09	6.5321e-07	up	22625	Ysk4
chr2	137083021	137083440	diffreps_peak_00082959	6.10422	419	NM_013822	Jag1	3.03729	7.86655e-07	2.61169e-05	up	16449	ABE2|Gsfabe2|Htu|Ozz|Ser-1
chr7	99346041	99346380	diffreps_peak_00131793	5.0908	339	NM_009825	Serpinh1	2.06466	8.1133e-06	0.000168699	up	12406	BERF-1|Cbp1|Cbp2|Hsp47|J6|Serpinh2|gp46
chr10	13128361	13129180	diffreps_peak_00010389	6.94662	819	NM_009538	Plagl1	2.0801	1.13079e-07	5.76584e-06	up	22634	Lot1|Zac1
chr8	108794141	108794969	diffreps_peak_00142430	8.66731	828	NM_007496	Zfhx3	2.32543	2.15123e-09	3.6524e-07	up	11906	A230102L03Rik|Atbf1|Sci|WBP9|mKIAA4228
chr17	28837561	28838000	diffreps_peak_00061010	6.95725	439	NM_001081315	Brpf3	2.98999	1.10344e-07	5.64773e-06	up	268936	AI413466|AW493400|mKIAA1286
chr9	59972161	59972480	diffreps_peak_00148812	6.12084	319	NM_172444	Thsd4	14.9048	7.57111e-07	2.53476e-05	up	207596	ADAMTSL-6|ADAMTSL6|AI585901|Adamtsl4|B230114P05Rik
chr14	122464641	122464980	diffreps_peak_00046006	6.06495	339	NM_022987	Zic5	68.9	8.61096e-07	2.80276e-05	up	65100	1700049L20Rik|Opr
chr3	69067701	69068020	diffreps_peak_00089417	5.37138	319	ENSMUST00000029353	Kpna4	9.58824	4.25223e-06	0.000101356	up	16649	1110058D08Rik|IPOA3
chr1	90778841	90779160	diffreps_peak_00004420	5.29909	319	NM_001243008	Col6a3	8.5	5.0224e-06	0.000115047	up	12835	AI507288|Col6a-3
chr1	170300101	170300620	diffreps_peak_00008148	11.3236	519	NM_001198955	Gm7694	3.15613	4.74625e-12	6.99737e-09	up	665574	EG665574
chr2	20744101	20744520	diffreps_peak_00075931	5.5285	419	uc008imk.1	Etl4	4.65322	2.96144e-06	7.57936e-05	up	208618	6620402G01Rik|9430077C05Rik|BC026657|E330027G05Rik|Etl-4|Skt
chr13	38346101	38346587	diffreps_peak_00036518	10.8746	486	NM_007556	Bmp6	4.41242	1.3348e-11	1.10271e-08	up	12161	D13Wsu115e|Vgr1
chr6	4528821	4529400	diffreps_peak_00116351	8.75023	579	uc009avn.1	Col1a2	4.86111	1.77733e-09	3.17268e-07	up	12843	AA960264|AI325291|Col1a-2|Cola-2|Cola2|oim
chr17	25568689	25569340	diffreps_peak_00060307	10.1564	651	uc008baz.1	Sox8	2.41524	6.97595e-11	3.11451e-08	up	20681	-
chr3	114030539	114030880	diffreps_peak_00092309	10.4868	341	NM_007729	Col11a1	3.34067	3.26006e-11	1.89794e-08	up	12814	C530001D20Rik|cho
chr8	12395561	12396040	diffreps_peak_00136518	7.56537	479	NM_009233	Sox1	2.1835	2.72038e-08	2.0346e-06	up	20664	BB176347|Sox-1
chr17	25569861	25570240	diffreps_peak_00060310	7.71154	379	uc008baz.1	Sox8	2.41119	1.94296e-08	1.60438e-06	up	20681	-
chr6	146603261	146603620	diffreps_peak_00124205	7.51922	359	NM_026281	Tm7sf3	4.00546	3.0254e-08	2.2004e-06	up	67623	2010003B14Rik|NARP1
chr1	106713881	106714290	diffreps_peak_00005077	6.44286	409	NM_009741	Bcl2	2.94281	3.60691e-07	1.42282e-05	up	12043	AW986256|Bcl-2|C430015F12Rik|D630044D05Rik|D830018M01Rik
chr8	45044141	45044520	diffreps_peak_00138176	8.91405	379	NM_001081286	Fat1	2.57759	1.21886e-09	2.45843e-07	up	14107	2310038E12Rik|AU023433|Fath|mFat1
chr8	70331521	70331940	diffreps_peak_00139356	5.64204	419	NM_030680	Upf1	2	2.28011e-06	6.11832e-05	up	19704	B430202H16Rik|NORF1|PNORF-1|Rent1|Upflp
chr4	97777607	97777994	diffreps_peak_00098033	9.49815	387	ENSMUST00000075448	Nfia	2.69052	3.17577e-10	9.29715e-08	up	18027	1110047K16Rik|9430022M17Rik|CTF|NF1-A|NF1A
chr1	171259441	171259840	diffreps_peak_00008272	10.6127	399	NM_172845	Adamts4	30.8571	2.43924e-11	1.54757e-08	up	240913	3830423K05|ADAM-TS4|ADAMTS-2|ADMP-1|mKIAA0688
chr3	83921661	83922040	diffreps_peak_00089750	6.12708	379	uc008pps.1	D930015E06Rik	2.47294	7.46306e-07	2.50723e-05	up	229473	Kiaa0922|mKIAA0922
chr11	100957581	100958080	diffreps_peak_00025833	7.73448	499	NM_008986	Ptrf	2.32271	1.84297e-08	1.54279e-06	up	19285	2310075E07Rik|AW546441|Cav-p60|Cavin
chr12	9580489	9580980	diffreps_peak_00029426	6.97907	491	NM_011859	Osr1	4.51975	1.04938e-07	5.44182e-06	up	23967	Odd1|Osr
chr1	133383561	133383924	diffreps_peak_00006206	5.42405	363	NM_011439	Sox13	3.49835	3.7666e-06	9.18136e-05	up	20668	AA407916|AW259412|AW540933|Sox-13
chr16	33684465	33684820	diffreps_peak_00055403	10.4499	355	NM_175256	Heg1	3.49616	3.54892e-11	2.02019e-08	up	77446	4632417D23Rik|5530401I02Rik|9530025L16Rik|BC038614|Gm629|OTTMUSG00000027315
chr13	51408617	51408945	diffreps_peak_00037290	9.24767	328	NM_010101	S1pr3	2.52341	5.65372e-10	1.3959e-07	up	13610	AI132464|Edg3|Lpb3|S1p3
chr4	154340720	154341160	diffreps_peak_00104517	5.23455	440	NM_027504	Prdm16	3.4062	5.82709e-06	0.000129607	up	70673	5730557K01Rik|csp1|mel1
chrX	110814621	110814960	diffreps_peak_00155977	9.1181	339	NM_008901	Pou3f4	3.44878	7.619e-10	1.73868e-07	up	18994	Brn-4|Brn4|OTF-9|Otf9|Slf|oct-9
chr1	189850601	189851600	diffreps_peak_00009514	10.6402	999	uc007eat.1	Ptpn14	3.90356	2.28996e-11	1.48505e-08	up	19250	C130080N23Rik|OTTMUSG00000022087|PTP36
chr3	87930241	87930583	diffreps_peak_00090091	7.93434	342	ENSMUST00000160143	Rrnad1	2.29352	1.16322e-08	1.13296e-06	up	229503	-
chr11	63158641	63159120	diffreps_peak_00021489	7.58583	479	NM_008885	Pmp22	2.64069	2.59517e-08	1.96461e-06	up	18858	22kDa|Gas-3|HNPP|Tr|trembler
chr13	74646170	74646620	diffreps_peak_00038536	7.71532	450	NM_030711	Erap1	4.45278	1.92608e-08	1.59349e-06	up	80898	Arts1|ERAAP|PILSA|PILSAP
chr14	70184827	70185136	diffreps_peak_00044211	10.4323	309	NM_011366	Sorbs3	2.79896	3.69571e-11	2.03589e-08	up	20410	SCAM-1|SH3P3|Sh3d4|vinexin-g
chr13	15463722	15464080	diffreps_peak_00035672	11.0371	358	NM_008130	Gli3	2.41865	9.18055e-12	9.47984e-09	up	14634	AI854843|AU023367|Bph|GLI3-190|GLI3FL|Pdn|Xt|add
chr16	65839208	65839733	diffreps_peak_00057002	11.2401	525	NM_028572	Vgll3	3.28975	5.75322e-12	8.1884e-09	up	73569	1700110N18Rik|4832416J22|C80713|Vgl-3|Vito-2
chr1	180333081	180334000	diffreps_peak_00009024	9.40708	919	NM_001081175	Itpkb	2.58883	3.91672e-10	1.07882e-07	up	320404	1110033J02Rik|E130307H12Rik
chr4	108624201	108625000	diffreps_peak_00099032	11.1547	799	ENSMUST00000166069	Gm20731	2.36007	7.00388e-12	8.82988e-09	up	NA	NA
chr17	50733361	50733740	diffreps_peak_00063291	5.74021	379	NM_028162	Tbc1d5	5.7316	1.81881e-06	5.1037e-05	up	72238	1600014N05Rik
chr7	3110217	3110520	diffreps_peak_00124387	5.26332	303	ENSMUST00000069044	Gm7353	3.31831	5.45354e-06	0.000122932	up	664817	EG664817
chr17	34211601	34212034	diffreps_peak_00061866	9.73672	433	ENSMUST00000121995	Gm15821	4.30906	1.83348e-10	6.11937e-08	up	100502931	OTTMUSG00000026437
chr6	34745618	34746639	diffreps_peak_00117756	5.29173	1021	ENSMUST00000115027	Cald1	2.80092	5.10825e-06	0.000116559	up	109624	4833423D12Rik|AI195384|AV071549|AW536160|C920027I18Rik
chr18	34860981	34861786	diffreps_peak_00067157	9.92892	805	ENSMUST00000064795	Egr1	2.91703	1.17783e-10	4.46153e-08	up	13653	A530045N19Rik|ETR103|Egr-1|Krox-1|Krox-24|Krox24|NGF1-A|NGFI-A|NGFIA|TIS8|Zenk|Zfp-6|Zif268|egr
chr19	4456494	4456820	diffreps_peak_00070775	6.47392	326	NM_134164	Syt12	4.56508	3.35801e-07	1.34878e-05	up	171180	-
chr1	73924781	73925160	diffreps_peak_00003224	10.1771	379	NM_027884	Tns1	3.2947	6.65089e-11	3.03552e-08	up	21961	1110018I21Rik|1200014E20Rik|AI648117|E030018G17Rik|E030037J05Rik|Tns
chr2	18025581	18026000	diffreps_peak_00075788	9.31567	419	uc008ilj.2	A930004D18Rik	5.30831	4.83422e-10	1.24001e-07	up	77940	AU022051
chr2	27886424	27886840	diffreps_peak_00076621	10.5496	416	NM_015734	Col5a1	2.69228	2.82074e-11	1.69019e-08	up	12831	AI413331
chr11	5871244	5872140	diffreps_peak_00018145	8.245	896	NM_009636	Aebp1	3.88589	5.68847e-09	6.97202e-07	up	11568	ACLP
chr4	133198321	133199100	diffreps_peak_00101777	10.0821	779	ENSMUST00000084241	Wasf2	4.63943	8.2778e-11	3.46901e-08	up	242687	AW742646|D4Ertd13e|WAVE2
chr6	5485241	5485560	diffreps_peak_00116428	6.71705	319	NM_013743	Pdk4	5.85274	1.91844e-07	8.69779e-06	up	27273	AV005916
chr11	115268141	115268454	diffreps_peak_00027386	5.54315	313	NM_007997	Fdxr	3.73617	2.8632e-06	7.36196e-05	up	14149	-
chr9	71725321	71725660	diffreps_peak_00149821	5.3582	339	NM_026599	Cgnl1	3.13203	4.38333e-06	0.000103189	up	68178	4933421H10Rik|9930020M10Rik|AI503810|Jacop
chr14	57699321	57699980	diffreps_peak_00043432	7.23313	659	NM_015771	Lats2	2.0709	5.84614e-08	3.50712e-06	up	50523	4932411G09Rik|AV277261|AW228608
chrX	52164641	52165252	diffreps_peak_00154344	9.41575	611	ENSMUST00000033450	Gpc4	3.03275	3.83927e-10	1.06753e-07	up	14735	9530073D23Rik|AF311610|AI385680|AI661372|K-glypican
chr7	25711761	25712200	diffreps_peak_00126339	6.57817	439	NM_028771	Ccdc97	2.12527	2.64139e-07	1.12538e-05	up	52132	1200014H14Rik|2810446P04Rik|AA545218|D7Ertd462e
chr4	136982081	136982420	diffreps_peak_00102352	6.88926	339	NM_198248	Zbtb40	16.2857	1.29044e-07	6.4264e-06	up	230848	BC059177|C230087D24|Gm571|mKIAA0478
chr7	15950401	15950792	diffreps_peak_00125071	7.09485	391	NM_153068	Ehd2	2.87723	8.03795e-08	4.42887e-06	up	259300	BC027084|C130052H20Rik
chr3	39358521	39358900	diffreps_peak_00088431	6.17071	379	ENSMUST00000056409	Gm9845	4.8432	6.74972e-07	2.32647e-05	up	100040853	ENSMUSG00000050533
chr10	88503584	88504073	diffreps_peak_00015202	6.44745	489	ENSMUST00000117440	Chpt1	2.86162	3.56903e-07	1.41043e-05	up	212862	-
chr12	80171728	80172120	diffreps_peak_00032159	8.1658	392	uc007oao.2	Actn1	2.13345	6.82659e-09	7.94408e-07	up	109711	3110023F10Rik|Actn1a
chr9	60869741	60870740	diffreps_peak_00148855	7.57453	999	NM_028283	Uaca	2.28964	2.66359e-08	2.00402e-06	up	72565	2700059D02Rik|nucling
chr11	45980601	45981020	diffreps_peak_00019831	6.69892	419	NM_173384	Sox30	9.6	2.00021e-07	8.98702e-06	up	214105	-
chr8	61549621	61550245	diffreps_peak_00138876	7.04019	624	NM_001293772	Palld	3.96796	9.11617e-08	4.87767e-06	up	72333	2410003B16Rik|6030492A02
chr7	141010396	141010770	diffreps_peak_00135217	7.61408	374	ENSMUST00000026565	Ifitm3	3.24481	2.43175e-08	1.87625e-06	up	66141	1110004C05Rik|Cd225|Cdw217|DSPA2b|Fgls|IP15|mil-1
chr2	16356661	16357100	diffreps_peak_00075702	6.69711	439	NM_026162	Plxdc2	2.05078	2.00859e-07	9.01564e-06	up	67448	1200007L24Rik|5430431D22Rik|AI646728|AU022916|AV231634|Tem7r
chr5	30060021	30060640	diffreps_peak_00106476	8.45916	619	NM_021288	Tyms	3.88058	3.47406e-09	5.00614e-07	up	22171	Ts
chr13	112987801	112988120	diffreps_peak_00040042	6.17036	319	NM_001081062	Ccno	2.74074	6.75517e-07	2.32736e-05	up	218630	C86987|Ccnu|E130318K11|Ung2
chr4	129148004	129148320	diffreps_peak_00101150	6.3696	316	ENSMUST00000072431	S100pbp	65.1	4.26972e-07	1.62244e-05	up	74648	4930429A08Rik|AI851343|S100pbpr
chr1	74368441	74368920	diffreps_peak_00003306	8.78423	479	NM_001033345	Catip	3.43489	1.64351e-09	3.01791e-07	up	241112	Gm216
chr2	65097821	65098760	diffreps_peak_00079093	7.13554	939	NM_027225	Cobll1	2.79667	7.31908e-08	4.13872e-06	up	319876	1810047P18Rik|Coblr1|D430044D16Rik
chr4	8751323	8753120	diffreps_peak_00094361	9.75992	1797	NM_001277149	Chd7	3.00446	1.73812e-10	5.84872e-08	up	320790	A730019I05Rik|Cycn|Cyn|Dz|Edy|Flo|GENA 47|GENA 60|Gena 52|Lda|Mt|Obt|Todo|WBE1|Whi|metis
chr10	82866625	82866960	diffreps_peak_00014723	6.94396	335	NM_025499	Eid3	2.65283	1.13773e-07	5.79351e-06	up	66341	1700027M21Rik|NS4EB
chr1	52500261	52500600	diffreps_peak_00002103	5.37302	339	ENSMUST00000069792	Nab1	4.15673	4.2362e-06	0.000101155	up	17936	-
chr3	89447401	89447960	diffreps_peak_00090549	6.23867	559	NM_146131	Pbxip1	2.51138	5.7721e-07	2.06505e-05	up	229534	4732463H20Rik
chr7	142658461	142659160	diffreps_peak_00135469	11.8284	699	ENSMUST00000121128	Igf2	3.33003	1.48459e-12	3.98082e-09	up	16002	AL033362|Igf-2|Igf-II|M6pr|Mpr|Peg2
chr15	85868679	85869057	diffreps_peak_00050876	5.42806	378	NM_013882	Gtse1	2.12475	3.73196e-06	9.11857e-05	up	29870	B99|Gtse-1
chr12	8990561	8991040	diffreps_peak_00029416	6.52539	479	uc007nah.2	Wdr35	3.05769	2.98272e-07	1.23333e-05	up	74682	4930459M12Rik|4931430C06|mKIAA1336
chr4	152127901	152128220	diffreps_peak_00104271	6.41978	319	uc008vzv.1	Espn	7.38806	3.80385e-07	1.48535e-05	up	56226	je
chr9	65135941	65136520	diffreps_peak_00149240	10.7666	579	NM_020043	Igdcc4	2.72867	1.71168e-11	1.2684e-08	up	56741	DDM36|Nope
chr3	107748801	107749169	diffreps_peak_00092060	10.6864	368	NM_007778	Csf1	3.16228	2.05868e-11	1.40627e-08	up	12977	C87615|Csfm|MCSF|op
chr3	123114001	123114626	diffreps_peak_00092614	9.90736	625	NM_080451	Synpo2	2.27887	1.23776e-10	4.60347e-08	up	118449	1110069I04Rik|2310068J10Rik|9530006G20Rik|AI848603|Myo
chr2	26459441	26460280	diffreps_peak_00076430	8.72431	839	NM_008714	Notch1	3.15376	1.88665e-09	3.30785e-07	up	18128	9930111A19Rik|Mis6|N1|Tan1|lin-12
chr7	4943921	4944460	diffreps_peak_00124728	8.82336	539	NM_173008	Ssc5d	4.3787	1.50191e-09	2.83148e-07	up	269855	A430110N23Rik|S5D-SRCRB
chr11	116331881	116332477	diffreps_peak_00027685	10.6449	596	NM_008240	Foxj1	2.74232	2.26528e-11	1.4784e-08	up	15223	FKHL-13|HFH-4|Hfh4
chr16	92498721	92499200	diffreps_peak_00058208	10.7461	479	NM_172469	Clic6	4.60065	1.7943e-11	1.2853e-08	up	209195	5730466J16Rik|AL022908|AW045520|CLIC1L
chr7	135700141	135700640	diffreps_peak_00134955	9.59703	499	NM_001081117	Mki67	3.35459	2.52912e-10	7.75875e-08	up	17345	D630048A14Rik|Ki-67|Ki67
chr8	127063921	127064240	diffreps_peak_00144308	5.31129	319	ENSMUST00000162309	Pard3	2.02586	4.88324e-06	0.000112351	up	93742	AA960621|AI256638|Asip|D8Ertd580e|Par-3|Par3|Pard-3|Pard3a|Phip
chr4	8690405	8690775	diffreps_peak_00094343	6.85609	370	NM_001277149	Chd7	3.02302	1.39288e-07	6.80054e-06	up	320790	A730019I05Rik|Cycn|Cyn|Dz|Edy|Flo|GENA 47|GENA 60|Gena 52|Lda|Mt|Obt|Todo|WBE1|Whi|metis
chr19	57008150	57008575	diffreps_peak_00074581	9.4208	425	NM_146102	Afap1l2	2.573	3.79486e-10	1.0595e-07	up	226250	AU041783|C86904|mKIAA1914
chr3	59208181	59208500	diffreps_peak_00089061	6.14999	319	NM_028808	P2ry13	8.72477	7.07961e-07	2.40279e-05	up	74191	2010001L06Rik|GPCR1|GPR94|Gpr86|P2Y13|P2yr13|SP174
chr7	101913261	101913583	diffreps_peak_00132221	7.17533	322	NM_001162974	Lrrc51	4.53601	6.67829e-08	3.87401e-06	up	69358	1700008D07Rik|Lrtomt
chr7	141459521	141459900	diffreps_peak_00135316	6.51442	379	NM_025802	Pnpla2	2.46178	3.05899e-07	1.25449e-05	up	66853	0610039C21Rik|1110001C14Rik|Atgl|TTS-2.2
chr11	75572401	75572740	diffreps_peak_00022889	7.24593	339	NM_173388	Slc43a2	2.14477	5.67639e-08	3.44869e-06	up	215113	7630402D21Rik|BC042513|Lat4
chr18	56707961	56708280	diffreps_peak_00068477	11.2108	319	NM_010721	Lmnb1	2.39348	6.15473e-12	8.40847e-09	up	16906	-
chrX	60892681	60893430	diffreps_peak_00154522	10.4201	749	NM_009237	Sox3	2.85023	3.80065e-11	2.06046e-08	up	20675	Sox-3
chr11	73184601	73184920	diffreps_peak_00022647	10.6217	319	NM_031251	Ctns	4.83088	2.38969e-11	1.53515e-08	up	83429	AI195360|AW049661
chr13	21786861	21787218	diffreps_peak_00035932	9.01559	357	NM_178184	Hist1h2an	2.84802	9.64744e-10	2.07018e-07	up	319170	-
chr4	63333261	63333880	diffreps_peak_00097127	8.72752	619	NM_025685	Col27a1	3.95877	1.87276e-09	3.30274e-07	up	373864	5730512J02Rik|AI449266
chr15	100260121	100260600	diffreps_peak_00052408	8.93794	479	NM_007497	Atf1	5.23618	1.15362e-09	2.36407e-07	up	11908	-
chr17	29490811	29491160	diffreps_peak_00061105	12.0251	349	ENSMUST00000024811	Pim1	3.94016	9.43808e-13	3.23446e-09	up	18712	Pim-1
chr4	63225001	63225540	diffreps_peak_00097105	7.49462	539	NM_025685	Col27a1	5.77068	3.20167e-08	2.28688e-06	up	373864	5730512J02Rik|AI449266
chr6	34741788	34742200	diffreps_peak_00117755	7.53088	412	uc009bhh.1	Cald1	3.39681	2.94523e-08	2.16251e-06	up	109624	4833423D12Rik|AI195384|AV071549|AW536160|C920027I18Rik
chr1	46235247	46235680	diffreps_peak_00001992	7.21862	433	uc007awy.2	Dnah7b	5.07093	6.0447e-08	3.59154e-06	up	227058	Dnahc7b|Gm107
chr19	54045481	54045860	diffreps_peak_00074396	6.83162	379	NM_007417	Adra2a	2.87293	1.47361e-07	7.10046e-06	up	11551	AW122659|Adra-2|Adra-2a|alpha(2A)AR|alpha2-C10|alpha2A|alpha2A-AR
chr13	13510481	13510840	diffreps_peak_00035564	8.38967	359	NM_010917	Nid1	10.0556	4.07692e-09	5.59968e-07	up	18073	A630025O17|Nid|entactin|entactin-1|nidogen-1
chr17	86963081	86963747	diffreps_peak_00065385	10.7409	666	ENSMUST00000024956	Rhoq	2.21045	1.81599e-11	1.2877e-08	up	104215	Arhq|TC10A|Tc10
chr4	119232914	119233280	diffreps_peak_00099737	8.30123	366	NM_019782	P3h1	2.75382	4.99771e-09	6.32982e-07	up	56401	2410024C15Rik|Gros1|Lepre1
chr19	55741809	55742260	diffreps_peak_00074481	6.86649	451	NM_009333	Tcf7l2	5.8692	1.35992e-07	6.68333e-06	up	21416	TCF4B|TCF4E|Tcf-4|Tcf4|mTcf-4B|mTcf-4E
chr15	31273196	31273500	diffreps_peak_00047255	6.72673	304	NM_146057	Dap	3.08074	1.87615e-07	8.55715e-06	up	223453	4921531N22Rik|AI789753|AU040360
chr15	76171081	76171680	diffreps_peak_00049201	8.42715	599	NM_011117	Plec	2.74317	3.73979e-09	5.28541e-07	up	18810	AA591047|AU042537|EBS1|PCN|PLTN|Plec1
chr16	84774122	84774553	diffreps_peak_00057600	9.98106	431	NM_023844	Jam2	2.9082	1.04458e-10	4.0542e-08	up	67374	1110002N23Rik|2410030G21Rik|2410167M24Rik|JAM-2|JAM-B|Jcam2|VE-JAM
chr5	103853261	103853600	diffreps_peak_00110167	5.87751	339	NM_133919	Aff1	11.3721	1.32583e-06	3.97335e-05	up	17355	9630032B01Rik|AW319193|Af4|Mllt2h|Rob
chr11	75575861	75576240	diffreps_peak_00022892	7.9481	379	NM_173388	Slc43a2	2.73993	1.12694e-08	1.10869e-06	up	215113	7630402D21Rik|BC042513|Lat4
chr17	35050021	35050486	diffreps_peak_00062011	11.682	465	ENSMUST00000007257	Clic1	3.74105	2.07963e-12	4.89852e-09	up	114584	Clcp|G6
chr8	31111861	31112172	diffreps_peak_00137687	5.87964	311	NM_175136	Rnf122	4.43478	1.31936e-06	3.95687e-05	up	68867	1110063C11Rik
chr10	121371143	121371480	diffreps_peak_00016734	5.42615	337	uc007hfn.1	Gns	2.81407	3.7484e-06	9.14899e-05	up	75612	2610016K11Rik|AU042285|C87209|G6S|N28088
chr3	89377643	89378160	diffreps_peak_00090505	5.12295	517	ENSMUST00000029677	Zbtb7b	5.44444	7.5344e-06	0.000159851	up	22724	Thpok|Zfp67|c-Krox
chr7	65302901	65303218	diffreps_peak_00129779	6.95407	317	NM_009386	Tjp1	2.07127	1.11154e-07	5.67902e-06	up	21872	ZO1
chr7	118491081	118491740	diffreps_peak_00133357	5.32137	659	NM_001033380	Itpripl2	3.51359	4.77124e-06	0.000110456	up	319622	C130081G24|E030018N11Rik
chr5	137111301	137111620	diffreps_peak_00114715	7.84	319	NM_201373	Trim56	4.92269	1.44543e-08	1.28786e-06	up	384309	A130009K11Rik|Gm452|RNF109
chr15	79327634	79328160	diffreps_peak_00049821	6.10111	526	NM_001199023	Pla2g6	2.9472	7.92305e-07	2.62471e-05	up	53357	BB112799|PNPLA9|iPLA(2)beta|iPLA2|iPLA2beta
chr17	86753921	86754308	diffreps_peak_00065373	7.43727	387	NM_010137	Epas1	2.28843	3.6537e-08	2.50919e-06	up	13819	HIF-2alpha|HIF2A|HLF|HRF|MOP2|bHLHe73
chr17	7771941	7772260	diffreps_peak_00059157	6.3389	319	NM_001081416	Fndc1	7.96774	4.58251e-07	1.71038e-05	up	68655	1110027O12Rik|1110051A18Rik|mKIAA1866
chr9	58312221	58312780	diffreps_peak_00148619	8.2089	559	NM_010729	Loxl1	16.8339	6.18164e-09	7.40376e-07	up	16949	Loxl
chr18	67402061	67402500	diffreps_peak_00069177	7.95471	439	NM_026473	Tubb6	2.27142	1.10993e-08	1.10395e-06	up	67951	2310057H16Rik|BB220206
chr16	31663908	31664321	diffreps_peak_00055151	9.7791	413	ENSMUST00000115201	Dlg1	2.09877	1.66303e-10	5.68001e-08	up	13383	B130052P05Rik|Dlgh1|E-dlg/SAP97|SAP-97|SAP97|mKIAA4187
chr11	109356661	109356980	diffreps_peak_00026984	5.21124	319	uc007mcc.1	Gm11696	6.39877	6.14842e-06	0.000135196	up	100036768	OTTMUSG00000003456
chr4	98115321	98115900	diffreps_peak_00098068	8.09606	579	NM_010905	Nfia	2.63713	8.01568e-09	8.87428e-07	up	18027	1110047K16Rik|9430022M17Rik|CTF|NF1-A|NF1A
chr10	56388641	56389040	diffreps_peak_00012116	7.09161	399	NM_010288	Gja1	2.05921	8.09816e-08	4.45034e-06	up	14609	AU042049|AW546267|Cnx43|Cx43|Cx43alpha1|Gja-1|Npm1|connexin43
chr10	93846001	93846360	diffreps_peak_00015577	7.84419	359	NM_183199	Usp44	8.44172	1.43157e-08	1.28088e-06	up	327799	E430004F17Rik
chr17	53567121	53567460	diffreps_peak_00063345	6.90465	339	NM_020005	Kat2b	5.14932	1.24552e-07	6.23758e-06	up	18519	A930006P13Rik|AI461839|AW536563|Pcaf|p/CAF
chr19	17122321	17122720	diffreps_peak_00072242	6.56718	399	NM_181348	Prune2	2.20497	2.70909e-07	1.14656e-05	up	353211	6330414G02Rik|A230083H22Rik|A330102H22Rik|Bmcc1|mKIAA0367
chr11	68211221	68211780	diffreps_peak_00021730	6.98425	559	NM_008744	Ntn1	3.22927	1.03693e-07	5.39191e-06	up	18208	AI561871|BC019633|Netrin-1
chr19	3876881	3877680	diffreps_peak_00070645	8.89655	799	uc008fxf.1	Chka	4.01024	1.26898e-09	2.53212e-07	up	12660	CK|CK/EK-alpha|Chetk-alpha|Chk|ChoK|EK|EtnK-alpha
chr5	114948461	114948800	diffreps_peak_00111544	6.78161	339	ENSMUST00000031538	2210016L21Rik	5.45066	1.65343e-07	7.72885e-06	up	72357	-
chr10	81349001	81349440	diffreps_peak_00014483	10.0943	439	uc007ghj.2	Hmg20b	4.0084	8.04758e-11	3.39158e-08	up	15353	AW610687|BRAF35|Hmgx2|Hmgxb2|Smarce1r
chr16	38602841	38603520	diffreps_peak_00055990	11.659	679	NM_020260	Arhgap31	2.48241	2.19271e-12	4.9281e-09	up	12549	5830477L08Rik|AU041750|Cdgap|D330026I07Rik
chr19	30174990	30175441	diffreps_peak_00072813	6.92235	451	NM_138595	Gldc	2.11401	1.19576e-07	6.02799e-06	up	104174	D030049L12Rik|D19Wsu57e
chr8	11199541	11199880	diffreps_peak_00136289	8.0975	339	NM_009931	Col4a1	8.63602	7.9891e-09	8.85201e-07	up	12826	Bru|Col4a-1|Raw|Svc
chr7	45215851	45216160	diffreps_peak_00128285	8.7047	309	uc009guf.1	Tead2	3.8772	1.97378e-09	3.41911e-07	up	21677	ETF|Etdf|TEAD-2|TEF-4|TEF4
chr19	24098000	24098315	diffreps_peak_00072433	5.39724	315	NM_011597	Tjp2	2.15393	4.00641e-06	9.65725e-05	up	21873	ZO-2
chr15	25781361	25781800	diffreps_peak_00046817	6.99242	439	NM_019472	Myo10	2.66013	1.01761e-07	5.31301e-06	up	17909	AW048724|D15Ertd600e|mKIAA0799
chr2	170109001	170109400	diffreps_peak_00085959	9.16751	399	NM_001033299	Zfp217	31.8485	6.79968e-10	1.60165e-07	up	228913	4933431C08Rik|AW987152|Gm562|ZABC1|Znf217
chr1	172369941	172370540	diffreps_peak_00008464	7.95979	599	NM_001039484	Kcnj10	2.78763	1.097e-08	1.09394e-06	up	16513	BIR10|BIRK-1|Kir1.2|Kir4.1
chr3	142241801	142242220	diffreps_peak_00093401	8.28999	419	NM_019808	Pdlim5	4.95342	5.12878e-09	6.45196e-07	up	56376	1110001A05Rik|AI987914|C87059|Enh|Enh1|Enh2|Enh3|LIM
chr10	4356201	4357020	diffreps_peak_00009908	7.67004	819	NM_031185	Akap12	2.64648	2.13776e-08	1.70491e-06	up	83397	AI317366|SSeCKS|Srcs5|Tsga12
chr7	30554861	30555300	diffreps_peak_00127244	8.21174	439	NM_001012401	Hspb6	2.12214	6.14127e-09	7.36651e-07	up	243912	AA387366|Gm479|Hsp20
chr16	45094028	45094340	diffreps_peak_00056511	8.17783	312	uc007zif.1	Ccdc80	2.76981	6.64007e-09	7.79341e-07	up	67896	2610001E17Rik|DRO1|Ssg1|Urb
chr10	4357481	4357939	diffreps_peak_00009909	7.62729	458	NM_031185	Akap12	2.2003	2.35893e-08	1.83307e-06	up	83397	AI317366|SSeCKS|Srcs5|Tsga12
chr8	45036841	45037160	diffreps_peak_00138174	8.07989	319	NM_001081286	Fat1	2.2067	8.31967e-09	9.09293e-07	up	14107	2310038E12Rik|AU023433|Fath|mFat1
chr8	84211721	84212060	diffreps_peak_00140616	5.54706	339	NM_172503	Zswim4	2.57201	2.83755e-06	7.30883e-05	up	212168	D330002I24|E130119J17Rik
chr17	26922904	26923302	diffreps_peak_00060572	8.19738	398	NM_053173	Kifc5b	2.0297	6.34777e-09	7.53831e-07	up	16580	Hset|KNSL2|Kifc5a
chr9	60871081	60871440	diffreps_peak_00148856	8.81622	359	NM_028283	Uaca	3.00559	1.52678e-09	2.87044e-07	up	72565	2700059D02Rik|nucling
chr3	20006549	20007000	diffreps_peak_00087462	7.86372	451	NM_001276248	Cp	3.51551	1.36862e-08	1.25328e-06	up	12870	D3Ertd555e
chr3	95490801	95491380	diffreps_peak_00091016	5.09327	579	uc008qjs.2	Arnt	3.2067	8.06726e-06	0.000168025	up	11863	D3Ertd557e|Drnt|ESTM42|Hif1b|W08714|bHLHe2|mKIAA4051
chr4	100776981	100777368	diffreps_peak_00098202	6.50927	387	NM_198037	Cachd1	2.03247	3.09549e-07	1.26591e-05	up	320508	1190007F10Rik|AI852726|B430218L07Rik|Vwcd1|mKIAA1573
chr10	81420441	81420798	diffreps_peak_00014523	8.31199	357	NM_008688	Nfic	2.57155	4.87538e-09	6.28363e-07	up	18029	1110019L22Rik|1500041O16Rik|AA589446|AI746521|NF1-C
chr11	109673041	109673460	diffreps_peak_00027035	6.39623	419	NM_153782	Fam20a	8.65138	4.01574e-07	1.54949e-05	up	208659	AI606893
chr1	72873805	72874180	diffreps_peak_00003215	7.87599	375	NM_010518	Igfbp5	2.04118	1.33049e-08	1.23578e-06	up	16011	AI256729|AW208790|IGFBP-5|IGFBP-5P
chr1	155226141	155226448	diffreps_peak_00007139	8.52847	307	uc007dbe.1	BC034090	37.375	2.96163e-09	4.52249e-07	up	207792	6820428L09|mKIAA1614
chr14	48120921	48121233	diffreps_peak_00042741	6.65305	312	NM_033602	Peli2	2.11797	2.22306e-07	9.77609e-06	up	93834	AW047589|BB129927
chr8	119442432	119442740	diffreps_peak_00143290	7.44338	308	uc012glr.1	Osgin1	12.234	3.60267e-08	2.48581e-06	up	71839	1700012B18Rik|Okl38
chr11	88999401	88999740	diffreps_peak_00024560	8.7637	339	ENSMUST00000000284	Trim25	119.2	1.72307e-09	3.11379e-07	up	217069	AA960166|AL022677|EFP|Zfp147
chr4	121097876	121098220	diffreps_peak_00100042	6.98941	344	NM_172700	Zmpste24	2.07741	1.02468e-07	5.34042e-06	up	230709	A530043O15Rik|D030046F19|FACE1|Face-1|MADB|STE24|Ste24p
chr4	126149235	126149540	diffreps_peak_00100516	7.17036	305	NM_172145	Eva1b	4.52015	6.75516e-08	3.91049e-06	up	230752	2610027C15Rik|Fam176b
chr8	61684521	61684860	diffreps_peak_00138896	5.27971	339	uc009lui.1	Palld	2.94994	5.25156e-06	0.000119245	up	72333	2410003B16Rik|6030492A02
chr18	84012961	84013280	diffreps_peak_00070375	5.0717	319	NM_001081300	Tshz1	2.24012	8.47814e-06	0.000174403	up	110796	5730407I04Rik|D18Bwg1409e|Mtsh1|NY-CO-33|Sdccag33|Tsh1|mKIAA4206|teashirt1
chr5	103564010	103564339	diffreps_peak_00110130	7.94631	329	NM_011204	Ptpn13	2.99964	1.1316e-08	1.11114e-06	up	19249	AI324989|PTP-BL|PTPL1|Ptpri|RIP
chr7	19303761	19304080	diffreps_peak_00125681	6.33975	319	NM_008036	Fosb	14.5556	4.5735e-07	1.71038e-05	up	14282	-
chr7	109556210	109556540	diffreps_peak_00132526	9.3537	330	NM_001001326	St5	2.96954	4.42893e-10	1.16857e-07	up	76954	2010004M01Rik|2610305K15Rik
chr12	102804801	102805140	diffreps_peak_00033878	5.64842	339	uc007ous.1	Btbd7	66.2	2.24686e-06	6.06006e-05	up	238386	5730507E09Rik|8030448M07|E130118E17Rik|FUP1|mKIAA1525
chr7	25225901	25226320	diffreps_peak_00126174	8.05911	419	NM_175436	Zfp526	3.76731	8.72743e-09	9.35401e-07	up	210172	D030024H03Rik|Znf526
chr5	92940541	92941400	diffreps_peak_00109621	9.91785	859	NM_015756	Shroom3	3.57798	1.20822e-10	4.52644e-08	up	27428	AL022960|D5Ertd287e|Shrm|Shrm3
chr19	55931433	55931980	diffreps_peak_00074527	11.9977	547	NM_009333	Tcf7l2	3.43715	1.00534e-12	3.27018e-09	up	21416	TCF4B|TCF4E|Tcf-4|Tcf4|mTcf-4B|mTcf-4E
chr2	119374241	119374581	diffreps_peak_00081558	9.4303	340	NM_026574	Ino80	4.2281	3.71278e-10	1.04369e-07	up	68142	2310079N15Rik|4632409L19Rik|Inoc1
chr10	126978821	126979301	diffreps_peak_00017080	6.46074	480	NM_001113470	Ctdsp2	2.02395	3.46147e-07	1.38059e-05	up	52468	AI586070|D10Ertd73e|OS-4|OS4|SCP2
chr6	29433161	29433660	diffreps_peak_00117250	10.545	499	NM_001081185	Flnc	8.32065	2.85093e-11	1.69835e-08	up	68794	1110055E19Rik|ABP-280|ABPL|Fln2
chr13	51847868	51848380	diffreps_peak_00037388	9.15287	512	NM_011817	Gadd45g	3.43842	7.03286e-10	1.64336e-07	up	23882	AI327420|C86281|CR6|DDIT2|OIG37
chr7	99352881	99353239	diffreps_peak_00131798	9.43583	358	NM_009825	Serpinh1	2.61516	3.66583e-10	1.03475e-07	up	12406	BERF-1|Cbp1|Cbp2|Hsp47|J6|Serpinh2|gp46
chr2	120422521	120422920	diffreps_peak_00081696	5.44178	399	uc008lvs.1	Ganc	3.7881	3.61593e-06	8.87959e-05	up	76051	5830445O15Rik|9330160A12|mFLJ00088
chr4	123735601	123736160	diffreps_peak_00100207	10.4177	559	NM_023423	Akirin1	2.85501	3.82184e-11	2.06649e-08	up	68050	6330407G11Rik
chr17	34971821	34972156	diffreps_peak_00061994	7.37675	335	NM_010479	Hspa1a	2.40392	4.19997e-08	2.7881e-06	up	193740	Hsp70-3|Hsp70.3|Hsp72|hsp68|hsp70A1
chr19	46396921	46397284	diffreps_peak_00073891	8.58451	363	NM_015752	Sufu	2.08649	2.60312e-09	4.1193e-07	up	24069	Su(fu)
chr2	105675521	105675860	diffreps_peak_00081024	5.56322	339	ENSMUST00000090397	Pax6	2.18035	2.73386e-06	7.08809e-05	up	18508	1500038E17Rik|AEY11|Dey|Gsfaey11|Pax-6|Sey
chr3	5401421	5401840	diffreps_peak_00087019	7.70877	419	NM_030708	Zfhx4	4.23529	1.95537e-08	1.60991e-06	up	80892	A930021B15|C130041O22Rik|Zfh-4|Zfh4
chr12	80109061	80110548	diffreps_peak_00032142	9.66717	1487	NM_007564	Zfp36l1	2.42926	2.15195e-10	6.91212e-08	up	12192	AW742437|AW743212|Berg36|Brf1|D530020L18Rik|ERF1|TIS11b|cMG1
chr18	56753001	56753380	diffreps_peak_00068485	7.42614	379	NM_010721	Lmnb1	3.07532	3.74856e-08	2.55549e-06	up	16906	-
chr1	163312394	163312840	diffreps_peak_00007769	5.85698	446	NM_011127	Prrx1	2.00819	1.39001e-06	4.12826e-05	up	18933	A230024N07Rik|AA755424|AI385634|AI843499|K-2|Pmx|Pmx1|Prx1|mHox
chr13	24832381	24832760	diffreps_peak_00036156	5.29904	379	uc007pwk.1	AK140178	7.51724	5.02295e-06	0.000115047	up	NA	NA
chr18	67401621	67401960	diffreps_peak_00069176	7.25653	339	NM_026473	Tubb6	3.41949	5.5395e-08	3.39675e-06	up	67951	2310057H16Rik|BB220206
chr12	54068441	54069240	diffreps_peak_00031009	7.66981	799	NM_013780	Npas3	2.30139	2.13887e-08	1.70491e-06	up	27386	4930423H22Rik|bHLHe12
chr4	123410301	123410940	diffreps_peak_00100145	8.35322	639	NM_001167918	D830031N03Rik	2.03986	4.43381e-09	5.92699e-07	up	442834	Kiaa0754|mKIAA0754
chr7	128545589	128546380	diffreps_peak_00134506	8.81314	791	NM_013863	Bag3	2.92582	1.53768e-09	2.88299e-07	up	29810	AA407278|Bis|mg638
chr5	73193827	73194260	diffreps_peak_00108797	5.39973	433	ENSMUST00000171179	Fryl	18.0833	3.98353e-06	9.61636e-05	up	72313	2010313D22Rik|2310004H21Rik|2510002A14Rik|9030227G01Rik|mKIAA0826
chr1	34723621	34724120	diffreps_peak_00001203	10.3818	499	uc007ape.1	AK082264	2.37309	4.15123e-11	2.20388e-08	up	NA	NA
chr4	43523240	43523580	diffreps_peak_00095965	6.71225	340	ENSMUST00000107914	Tpm2	2.72625	1.93977e-07	8.77121e-06	up	22004	Tpm-2|Trop-2
chr7	135695261	135695620	diffreps_peak_00134950	10.9254	359	NM_001081117	Mki67	3.19882	1.18752e-11	1.05086e-08	up	17345	D630048A14Rik|Ki-67|Ki67
chr15	76174941	76175320	diffreps_peak_00049203	6.3816	379	NM_011117	Plec	2.31716	4.15339e-07	1.59037e-05	up	18810	AA591047|AU042537|EBS1|PCN|PLTN|Plec1
chr8	11007921	11008458	diffreps_peak_00136281	6.13538	537	ENSMUST00000040514	Irs2	2.09976	7.3219e-07	2.46857e-05	up	384783	Irs-2
chr16	43627921	43628420	diffreps_peak_00056405	7.28811	499	ENSMUST00000114694	Zbtb20	2.69964	5.15096e-08	3.21722e-06	up	56490	1300017A20Rik|7330412A13Rik|A930017C21Rik|D16Wsu73e|DPZF|HOF|ODA-8S|Oda8|Zfp288
chr7	109557121	109557461	diffreps_peak_00132527	7.36848	340	NM_001001326	St5	2.95035	4.28071e-08	2.82705e-06	up	76954	2010004M01Rik|2610305K15Rik
chr5	136032259	136032640	diffreps_peak_00114544	7.11306	381	NM_023742	Dtx2	5.63037	7.70792e-08	4.29462e-06	up	74198	2610524D08Rik|AA408415|AU022494|Deltex2
chr2	57114717	57115038	diffreps_peak_00078763	5.07207	321	NM_013613	Nr4a2	3.07849	8.47081e-06	0.000174304	up	18227	HZF-3|NOT|Nurr1|RNR-1|TINOR|TINUR
chr4	55529998	55530660	diffreps_peak_00096711	5.30416	662	NM_010637	Klf4	2.71169	4.96405e-06	0.000114069	up	16600	EZF|Gklf|Zie
chr2	26484267	26484606	diffreps_peak_00076441	10.1459	339	NM_008714	Notch1	2.56412	7.14607e-11	3.14199e-08	up	18128	9930111A19Rik|Mis6|N1|Tan1|lin-12
chr12	30016541	30016920	diffreps_peak_00030189	8.06289	379	NM_181395	Pxdn	4.9989	8.6519e-09	9.31201e-07	up	69675	2310075M15Rik|C85409|E330004E07|VPO1|mKIAA0230
chr13	111808681	111808993	diffreps_peak_00039992	10.991	312	ENSMUST00000109267	Map3k1	2.89904	1.02097e-11	9.63675e-09	up	26401	MAPKKK1|MEKK1|Mekk
chr2	26468281	26468640	diffreps_peak_00076433	9.46099	359	NM_008714	Notch1	3.59768	3.45946e-10	9.88754e-08	up	18128	9930111A19Rik|Mis6|N1|Tan1|lin-12
chr12	98688721	98689180	diffreps_peak_00033438	8.26986	459	NM_011877	Ptpn21	2.50266	5.372e-09	6.6922e-07	up	24000	PTPD1|PTPRL10
chr2	151543621	151544000	diffreps_peak_00083610	6.29141	379	uc008ndx.1	Fkbp1a	2.63148	5.11194e-07	1.87026e-05	up	14225	FKBP12|Fkbp|Fkbp1
chr13	68584301	68584640	diffreps_peak_00038362	7.15221	339	NM_027123	Fastkd3	14.8929	7.04358e-08	4.02761e-06	up	69577	2310010B21Rik|AW048587
chr11	101525081	101525560	diffreps_peak_00025932	10.3158	479	NM_009764	Brca1	3.54757	4.83289e-11	2.46365e-08	up	12189	-
chr7	116164031	116164360	diffreps_peak_00133143	11.0823	329	NM_172743	Plekha7	3.76504	8.27433e-12	9.32219e-09	up	233765	A430081P20Rik|AI414265
chr15	86185841	86186141	diffreps_peak_00050963	7.80192	300	NM_145475	Cerk	12.1288	1.5779e-08	1.37422e-06	up	223753	AI848610|D330016D08Rik|mKIAA1646
chr8	72152801	72153142	diffreps_peak_00139818	7.98915	341	ENSMUST00000003575	Tpm4	2.34745	1.02531e-08	1.04743e-06	up	326618	2610528G24Rik|Tpm4.2|Tpm4.2cy
chr14	54926081	54926560	diffreps_peak_00043115	5.13328	479	NM_010112	Efs	5.10241	7.35737e-06	0.00015681	up	13644	-
chr14	31138780	31139124	diffreps_peak_00041976	8.77987	344	NM_027289	Nt5dc2	2.3548	1.66007e-09	3.03947e-07	up	70021	2510015F01Rik
chr14	65397921	65398240	diffreps_peak_00043915	6.64387	319	NM_199029	Zfp395	6.5283	2.27052e-07	9.95487e-06	up	380912	BC053701|Gm910
chr19	17836954	17837260	diffreps_peak_00072264	8.6027	306	NM_001163144	Pcsk5	2.94522	2.49633e-09	4.01258e-07	up	18552	PC5|PC6|SPC6|b2b1549Clo|b2b585Clo
chr6	83151861	83152280	diffreps_peak_00119908	5.86974	419	ENSMUST00000153148	Wdr54	2.10759	1.34977e-06	4.03272e-05	up	75659	1700030E05Rik
chr12	80259986	80260371	diffreps_peak_00032185	7.96446	385	NM_134156	Actn1	2.15537	1.08527e-08	1.08436e-06	up	109711	3110023F10Rik|Actn1a
chr3	57574822	57575257	diffreps_peak_00088980	8.40437	435	NM_133784	Wwtr1	2.36909	3.94118e-09	5.44241e-07	up	97064	2310058J06Rik|2610021I22Rik|C78399|Taz
chr7	144939521	144939900	diffreps_peak_00135761	9.31948	379	NM_007631	Ccnd1	2.61495	4.79206e-10	1.24001e-07	up	12443	AI327039|CycD1|Cyl-1|PRAD1|bcl-1|cD1
chrX	60892221	60892560	diffreps_peak_00154521	5.68096	339	NM_009237	Sox3	3.17487	2.08466e-06	5.72045e-05	up	20675	Sox-3
chr1	172372521	172373000	diffreps_peak_00008467	9.75784	479	NM_001039484	Kcnj10	2.45174	1.74647e-10	5.86719e-08	up	16513	BIR10|BIRK-1|Kir1.2|Kir4.1
chr8	12397521	12397860	diffreps_peak_00136520	7.19066	339	NM_009233	Sox1	2.44827	6.44673e-08	3.77784e-06	up	20664	BB176347|Sox-1
chr6	15720660	15720963	diffreps_peak_00116758	7.70918	303	NM_175088	Mdfic	2.11747	1.95353e-08	1.60905e-06	up	16543	Kdt1|Mdfid
chr17	88635120	88635440	diffreps_peak_00065527	7.309	320	NM_029858	Ston1	2.70577	4.90903e-08	3.10506e-06	up	77057	4921524J06Rik|C86231|Salf|Sblf
chr7	101321501	101322033	diffreps_peak_00132100	8.24849	532	ENSMUST00000172630	Stard10	2.08587	5.643e-09	6.92872e-07	up	56018	AV048538|CGI-52|NY-C0-28|PC-TP2|PCTP2|Pctpl|Sdccag28|SdccagG28|TISP-81
chr4	137569761	137570380	diffreps_peak_00102422	11.3807	619	NM_008305	Hspg2	3.68452	4.16227e-12	6.6512e-09	up	15530	AI852380|Pcn|Plc|per
chr2	125722961	125723380	diffreps_peak_00082166	5.72213	419	NM_199022	Shc4	5.38926	1.89615e-06	5.28237e-05	up	271849	6230417E10Rik|9930029B02Rik|Gm685|RaLP
chr1	180989553	180989940	diffreps_peak_00009088	9.37553	387	ENSMUST00000036928	Ephx1	2.52454	4.21186e-10	1.13122e-07	up	13849	EH|Eph-1|Eph1|Epxh1|mEH
chr19	46654501	46654840	diffreps_peak_00073992	6.87571	339	NM_146099	Wbp1l	2.06092	1.33134e-07	6.57733e-06	up	226178	D19Wsu162e|Opal1
chr7	28372261	28372640	diffreps_peak_00126778	8.64288	379	NM_138752	Plekhg2	13.3319	2.27573e-09	3.79153e-07	up	101497	AI194308|Clg|Cslg
chr7	48870690	48871160	diffreps_peak_00128764	9.85053	470	NM_001013368	E2f8	3.07029	1.41081e-10	5.02805e-08	up	108961	4432406C08Rik|AA410048
chr12	109459606	109460540	diffreps_peak_00034301	7.44144	934	NM_010052	Dlk1	2.09689	3.61877e-08	2.49223e-06	up	13386	AW742678|DLK-1|DlkI|FA1|Ly107|Peg9|SCP1|ZOG|pG2|pref-1
chr19	55845891	55846220	diffreps_peak_00074506	7.93853	329	uc008hym.1	Ppnr	4.98764	1.15204e-08	1.12702e-06	up	26930	mp41
chr14	70170221	70170540	diffreps_peak_00044205	6.60481	319	uc007unj.1	Pdlim2	4.56024	2.4842e-07	1.07175e-05	up	213019	4732462F18Rik|Slim
chr10	17799087	17799533	diffreps_peak_00010518	7.23256	446	NM_138628	Txlnb	2.60832	5.85389e-08	3.51025e-06	up	378431	2310001N14Rik|Mdp77
chr10	87493021	87493480	diffreps_peak_00015172	5.48324	459	NM_008553	Ascl1	2.70483	3.28672e-06	8.26429e-05	up	17172	AI225900|ASH1|Mash1|bHLHa46
chrX	102514181	102514500	diffreps_peak_00155705	6.64041	319	NM_008832	Phka1	10.1744	2.28868e-07	1.00238e-05	up	18679	5330411D17|9830108K24Rik|Phka
chr14	54464281	54464611	diffreps_peak_00042980	8.98635	330	NM_022993	Lrp10	2.68137	1.03194e-09	2.18012e-07	up	65107	Lrp9
chr17	84187643	84187947	diffreps_peak_00065116	10.2373	304	NM_001001806	Zfp36l2	2.16598	5.78972e-11	2.7917e-08	up	12193	Brf2|ERF2|Tis11d
chr14	56647321	56647680	diffreps_peak_00043348	7.78744	359	NM_001145978	Parp4	11.1014	1.63138e-08	1.40823e-06	up	328417	Adprtl1|C030027K23Rik|E230037B21Rik|Gm743|PARPL|PH5P|VAULT3|VPARP|p193
chr9	20770049	20770680	diffreps_peak_00145107	6.67822	631	NM_016919	Col5a3	3.80851	2.09789e-07	9.34394e-06	up	53867	-
chr18	65477721	65478080	diffreps_peak_00069056	6.51563	359	NM_172833	Malt1	65.6	3.05048e-07	1.25154e-05	up	240354	A630046N12|D430033E09Rik|Pcasp1
chr16	45095501	45095860	diffreps_peak_00056512	8.66287	359	NM_026439	Ccdc80	3.76891	2.17334e-09	3.67776e-07	up	67896	2610001E17Rik|DRO1|Ssg1|Urb
chr2	26089542	26090000	diffreps_peak_00076353	9.12302	458	NM_026495	Nacc2	2.03354	7.53316e-10	1.72101e-07	up	67991	0610020I02Rik|AI448087|Btbd14a|C030048H19Rik
chr3	107331141	107331660	diffreps_peak_00092003	5.77854	519	NM_001045807	Rbm15	2.09631	1.66517e-06	4.74931e-05	up	229700	C230088J01Rik|mKIAA1438
chr6	124809621	124810040	diffreps_peak_00123015	8.02263	419	ENSMUST00000112473	Spsb2	8.16599	9.49222e-09	9.87919e-07	up	14794	AI461677|C9|Grcc9|SSB2
chr11	109362793	109363160	diffreps_peak_00026987	10.4372	367	NM_010303	Gna13	2.8278	3.65462e-11	2.02962e-08	up	14674	AU024132|AU043124|Galpha13
chr7	4740166	4740780	diffreps_peak_00124658	6.61143	614	uc009eyj.2	Suv420h2	2.48035	2.44665e-07	1.0571e-05	up	232811	BC024816|KMT5C|Suv4-20h2
chrX	42094641	42095040	diffreps_peak_00154096	10.0371	399	NM_009688	Xiap	2.42853	9.18189e-11	3.71648e-08	up	11798	1110015C02Rik|Aipa|Api3|Birc4|IAP3|ILP-1|MIHA
chr13	95601788	95602120	diffreps_peak_00039214	7.0905	332	NM_010169	F2r	3.26029	8.1189e-08	4.46023e-06	up	14062	AI482343|Cf2r|Par1|ThrR
chr13	3883041	3883480	diffreps_peak_00035162	7.61045	439	NM_019671	Net1	2.25599	2.45217e-08	1.88845e-06	up	56349	Net1a|mNET1
chr4	83554693	83555140	diffreps_peak_00097761	8.86554	447	uc008tlb.1	Ccdc171	2.85237	1.36289e-09	2.6574e-07	up	320226	4930418J05Rik|4930473A06Rik|A330015D16Rik
chr6	94699541	94699860	diffreps_peak_00121173	6.75508	319	NM_008377	Lrig1	6.78058	1.75759e-07	8.11077e-06	up	16206	D6Bwg0781e|Img|LIG-1
chr7	28377761	28378700	diffreps_peak_00126781	8.06433	939	uc029wef.1	Zfp36	4.61492	8.62325e-09	9.28932e-07	up	22695	Gos24|Nup475|TIS11D|TISII|Tis11|Ttp|Zfp-36
chr5	103833601	103834060	diffreps_peak_00110158	9.81226	459	NM_133919	Aff1	3.10847	1.54077e-10	5.32453e-08	up	17355	9630032B01Rik|AW319193|Af4|Mllt2h|Rob
chr14	26268026	26268420	diffreps_peak_00041554	6.16455	394	NM_183389	Duxbl1	6.82292	6.84614e-07	2.34139e-05	up	278672	1110051B16Rik|Duxbl|Duxl
chr18	74196521	74196840	diffreps_peak_00069621	7.90872	319	NM_025581	Ska1	11.0216	1.23391e-08	1.17888e-06	up	66468	2810433K01Rik|AV117428
chr5	115453825	115454500	diffreps_peak_00111653	8.85871	675	ENSMUST00000150779	Msi1	2.19102	1.3845e-09	2.68167e-07	up	17690	Msi1h|Musahi1|m-Msi-1
chr16	91270301	91270800	diffreps_peak_00058023	7.87007	499	NM_016968	Olig1	2.15948	1.34875e-08	1.2451e-06	up	50914	AI836478|AW494459|Bhlhb6|Olg-1|Oligo1|bHLHe21
chr18	34862541	34863320	diffreps_peak_00067158	6.85495	779	NM_007913	Egr1	2.04155	1.39653e-07	6.81073e-06	up	13653	A530045N19Rik|ETR103|Egr-1|Krox-1|Krox-24|Krox24|NGF1-A|NGFI-A|NGFIA|TIS8|Zenk|Zfp-6|Zif268|egr
chr6	72234701	72235380	diffreps_peak_00119517	7.22999	679	NM_153778	Atoh8	3.92093	5.88856e-08	3.52637e-06	up	71093	4933425C05Rik|Hath6|Math6|bHLHa21|okadin
chr7	123286497	123287013	diffreps_peak_00133785	11.2236	516	NM_144529	Arhgap17	2.56288	5.97531e-12	8.26623e-09	up	70497	5730403H17Rik|Nadrin|Nadrin2|Rich1|Wbp15
chr2	13574081	13574600	diffreps_peak_00075610	8.8255	519	ENSMUST00000028062	Vim	3.5214	1.49452e-09	2.82274e-07	up	22352	-
chr15	86031941	86032380	diffreps_peak_00050916	12.3401	439	NM_009886	Celsr1	6.90639	4.56944e-13	2.57788e-09	up	12614	Adgrc1|Crsh|Scy|crash
chr1	86045862	86046420	diffreps_peak_00003950	9.31752	558	NM_001144992	2810459M11Rik	3.13066	4.81375e-10	1.24001e-07	up	72792	-
chr7	6394881	6395320	diffreps_peak_00124852	6.62762	439	NM_175247	Zfp28	3.29829	2.3571e-07	1.02817e-05	up	22690	2810438M17Rik|Zfp-28|mkr-5
chr6	116338021	116338360	diffreps_peak_00122266	5.12854	339	NM_027920	2022-03-08	2.32513	7.43805e-06	0.000158351	up	71779	1300017E09Rik|MARCH-VIII|Mir

## Sheet: Up-OGDR3h_vs_Control
Chromosome	Transcript start	Transcript end	Peak ID	Score	Peak length	Transcript ID	Gene name	Fold change	P value	FDR	Regulation	Gene ID	Synonyms
chr14	31138780	31139124	diffreps_peak_00039850	8.64703	344	NM_027289	Nt5dc2	2.21843	2.2541e-09	2.55622e-07	up	70021	2510015F01Rik
chr4	106653421	106653800	diffreps_peak_00093866	8.85309	379	NM_172272	Pars2	143.7	1.40251e-09	1.81387e-07	up	230577	BC027073
chr4	147869301	147869620	diffreps_peak_00098311	8.65192	319	NM_010244	Fv1	160.4	2.22882e-09	2.53981e-07	up	14349	Fv-1|Rv-1|Rv1
chr13	37931761	37932100	diffreps_peak_00034575	5.5074	339	NM_026830	Rreb1	2.32355	3.10888e-06	5.64194e-05	up	68750	1110037N09Rik|AA414966|B930013M22Rik
chr1	136215821	136216320	diffreps_peak_00006075	5.64262	499	NM_028872	5730559C18Rik	3.34776	2.27708e-06	4.34965e-05	up	67313	1700034M08Rik|4933426C09Rik|AI586180|D1Mgi54
chr6	4760081	4760500	diffreps_peak_00110452	8.01906	419	NM_130877	Peg10	4.08728	9.57071e-09	6.70463e-07	up	170676	AA407948|Edr|HB-1|MEF3L|Mar2|Mart2|MyEF-3
chr3	20006549	20007040	diffreps_peak_00082900	6.61201	491	NM_001276248	Cp	4.81167	2.44337e-07	6.97074e-06	up	12870	D3Ertd555e
chr16	65839208	65839733	diffreps_peak_00054082	7.40213	525	NM_028572	Vgll3	4.63158	3.96156e-08	1.75757e-06	up	73569	1700110N18Rik|4832416J22|C80713|Vgl-3|Vito-2
chr1	156366039	156366484	diffreps_peak_00006693	9.25942	445	ENSMUST00000102782	Gm2000	2.01456	5.50279e-10	8.95577e-08	up	100038991	-
chr2	104493220	104493560	diffreps_peak_00076742	6.55336	340	ENSMUST00000111124	Hipk3	2.30663	2.79664e-07	7.72315e-06	up	15259	DYRK6|FIST3|PKY|mir-1902
chr6	72632649	72632958	diffreps_peak_00113552	6.92791	309	ENSMUST00000081929	Gm15401	2.18662	1.18056e-07	3.9324e-06	up	100038714	ENSMUSG00000072999|OTTMUSG00000021199
chr1	64737321	64737660	diffreps_peak_00002632	6.28719	339	NM_022721	Fzd5	6.97561	5.16187e-07	1.26507e-05	up	14367	5330434N09Rik|AI427138|Fz-5|Fz5|mFz5
chr13	95601788	95602120	diffreps_peak_00037239	7.91057	332	NM_010169	F2r	4.26972	1.22867e-08	7.85087e-07	up	14062	AI482343|Cf2r|Par1|ThrR
chr3	89380581	89381400	diffreps_peak_00085809	9.00459	819	NM_009565	Zbtb7b	2.48726	9.89483e-10	1.39125e-07	up	22724	Thpok|Zfp67|c-Krox
chr6	128321261	128321640	diffreps_peak_00117144	7.75149	379	NM_011657	Tulp3	4.69309	1.7722e-08	9.96855e-07	up	22158	2310022L06Rik|AI316887
chr10	70282288	70282680	diffreps_peak_00012304	7.42011	392	NM_025807	Slc16a9	2.06005	3.80097e-08	1.70491e-06	up	66859	1200003C15Rik|4930425B13Rik|AI552636
chr1	169974661	169975200	diffreps_peak_00007586	10.5835	539	NM_022563	Ddr2	3.86096	2.60934e-11	9.37497e-09	up	18214	AW495251|Ntrkr3|tyro10
chr19	5741801	5742180	diffreps_peak_00067458	8.47556	379	NM_008520	Ltbp3	6.18322	3.34536e-09	3.2518e-07	up	16998	Ltbp2|mFLJ00070
chr1	146901021	146901360	diffreps_peak_00006240	7.76211	339	NM_153539	Brinp3	96.1	1.72937e-08	9.80934e-07	up	215378	B830045N13Rik|Fam5c
chr14	48120921	48121233	diffreps_peak_00040579	10.2344	312	NM_033602	Peli2	2.00617	5.82943e-11	1.65538e-08	up	93834	AW047589|BB129927
chr19	6324661	6325480	diffreps_peak_00067576	10.7458	819	NM_001033342	Cdc42bpg	3.09345	1.79572e-11	7.37593e-09	up	240505	BC046418|MRCKgamma
chr9	58312221	58312560	diffreps_peak_00141055	9.09323	339	NM_010729	Loxl1	16.4672	8.06805e-10	1.19719e-07	up	16949	Loxl
chr7	45215851	45216200	diffreps_peak_00121742	11.121	349	uc009guf.1	Tead2	5.36859	7.56789e-12	4.50873e-09	up	21677	ETF|Etdf|TEAD-2|TEF-4|TEF4
chr7	142471842	142472220	diffreps_peak_00128558	6.54905	378	NM_019391	Lsp1	3.40031	2.82455e-07	7.79153e-06	up	16985	Lsp-1|WP34|p50|pp52
chr1	172210201	172210503	diffreps_peak_00007844	10.7412	302	NM_009813	Casq1	4.72713	1.81456e-11	7.39788e-09	up	12372	CSQ|CSQ-1|CSQ1|sCSQ
chr8	90248701	90249017	diffreps_peak_00134159	7.27033	316	NM_172913	Tox3	2.80521	5.36629e-08	2.19375e-06	up	244579	500-9|BC052044|C230068E13|CAGF9|Tnrc9
chr4	118225798	118226100	diffreps_peak_00094624	10.4496	302	NM_011213	Ptprf	2.36966	3.55146e-11	1.14753e-08	up	19268	AA591035|LAR|LARS|RPTP-LAR
chr3	104794861	104795240	diffreps_peak_00087050	7.13653	379	NM_008619	Mov10	4.36173	7.3024e-08	2.76324e-06	up	17454	C77703|Mov-10
chr8	80879801	80880519	diffreps_peak_00133252	8.65659	718	NM_001301298	Gab1	2.00177	2.20502e-09	2.52276e-07	up	14388	AA408973|AW107238
chr11	60713821	60714188	diffreps_peak_00020036	7.70651	367	NM_008502	Llgl1	2.0937	1.96557e-08	1.06837e-06	up	16897	AI325176|Lgl1|Llglh|Mgl1
chr16	24762121	24762500	diffreps_peak_00052055	5.95592	379	uc007yud.2	Lpp	3.59581	1.10682e-06	2.36604e-05	up	210126	9430020K16Rik|AA959454|AU024130|B130055L10Rik|C79715|D630048H16
chr6	15720660	15720963	diffreps_peak_00110812	10.8064	303	NM_175088	Mdfic	2.65463	1.56161e-11	6.72504e-09	up	16543	Kdt1|Mdfid
chr18	48048081	48048383	diffreps_peak_00064722	6.75538	302	NM_001025388	Eno1b	12.1677	1.75638e-07	5.36823e-06	up	433182	EG433182|Eno1|Gm5506
chr4	119232914	119233400	diffreps_peak_00094742	11.8029	486	NM_019782	P3h1	2.94538	1.57441e-12	1.81877e-09	up	56401	2410024C15Rik|Gros1|Lepre1
chr4	129010562	129011200	diffreps_peak_00096023	6.48575	638	NM_016895	Ak2	2.42774	3.26774e-07	8.77732e-06	up	11637	Ak-2|D4Ertd220e
chr8	85299631	85299992	diffreps_peak_00133899	6.50579	361	NM_019716	Orc6	2.41978	3.1204e-07	8.45944e-06	up	56452	6720420I10Rik|Orc6l
chr10	4357561	4357939	diffreps_peak_00009333	7.2677	378	NM_031185	Akap12	2.78684	5.39885e-08	2.20132e-06	up	83397	AI317366|SSeCKS|Srcs5|Tsga12
chr16	33829664	33829980	diffreps_peak_00052539	7.23907	316	NM_010580	Itgb5	2.47088	5.76674e-08	2.30289e-06	up	16419	AA475909|AI874634|ESTM23|[b]-5|[b]5|[b]5A|[b]5B|beta-5|beta5
chr3	87977721	87980040	diffreps_peak_00085410	6.68719	2319	NM_016701	Nes	3.43778	2.05499e-07	6.09772e-06	up	18008	AA166324|C78523|ESTM46
chr6	29433161	29433540	diffreps_peak_00111298	7.60061	379	NM_001081185	Flnc	18.4381	2.50838e-08	1.26352e-06	up	68794	1110055E19Rik|ABP-280|ABPL|Fln2
chr4	108624221	108624960	diffreps_peak_00094094	6.79774	739	ENSMUST00000166069	Gm20731	2.46995	1.59316e-07	4.95797e-06	up	NA	NA
chr2	146223021	146223500	diffreps_peak_00079107	6.87685	479	NM_016889	Insm1	5.01742	1.32786e-07	4.31794e-06	up	53626	IA-1
chrX	145504801	145505120	diffreps_peak_00148599	7.29888	319	ENSMUST00000112835	Amot	3.66101	5.02478e-08	2.09428e-06	up	27494	CAG-2|D0Kist1|Sii6
chr14	61612481	61612833	diffreps_peak_00041356	7.12613	352	NM_206974	Kcnrg	5.94681	7.47941e-08	2.8162e-06	up	328424	Clld4|E030012H22Rik|Gm745
chrX	37163661	37164091	diffreps_peak_00146148	9.30121	430	NM_001033785	Akap14	9.64179	4.9979e-10	8.33931e-08	up	434756	-
chr7	135700161	135700620	diffreps_peak_00128117	8.99576	459	NM_001081117	Mki67	3.69368	1.00982e-09	1.40893e-07	up	17345	D630048A14Rik|Ki-67|Ki67
chr2	91982481	91983007	diffreps_peak_00076156	7.49348	526	NM_011957	Creb3l1	2.44275	3.21011e-08	1.51489e-06	up	26427	Oasis
chr2	146222001	146222380	diffreps_peak_00079105	5.23607	379	NM_016889	Insm1	2.73212	5.80675e-06	9.51489e-05	up	53626	IA-1
chr5	137106881	137107300	diffreps_peak_00108833	5.8861	419	ENSMUST00000054384	Trim56	3.4832	1.29986e-06	2.71168e-05	up	384309	A130009K11Rik|Gm452|RNF109
chr18	80607681	80608000	diffreps_peak_00066655	6.31555	319	NM_198429	Nfatc1	5.28226	4.8356e-07	1.19843e-05	up	18018	2210017P03Rik|AI449492|AV076380|NF-ATc|NFAT2|NFATc|Nfatcb
chr14	19751256	19751565	diffreps_peak_00038840	7.35842	309	NM_008695	Nid2	9.50064	4.38105e-08	1.89155e-06	up	18074	AW547149|Ly111|NID-2|entactin-2|nidogen-2
chr7	100930681	100931080	diffreps_peak_00125351	6.27223	399	NM_001081116	Arhgef17	2.60214	5.34278e-07	1.30089e-05	up	207212	8030463K16|AI428794|AW558066|BC035332|mKIAA0337
chr18	52528741	52529740	diffreps_peak_00064773	8.10887	999	NM_010728	Lox	5.55035	7.78264e-09	5.82207e-07	up	16948	AI893619|TSC-160|rrg
chrM	5761	6080	diffreps_peak_00145433	6.41323	319	ENSMUST00000082402	mt-Co1	2.09483	3.86159e-07	1.00315e-05	up	NA	NA
chr11	119505587	119505962	diffreps_peak_00026651	5.76741	375	ENSMUST00000064513	Endov	2.40641	1.70839e-06	3.4141e-05	up	338371	A730011L01Rik
chr4	124838561	124838917	diffreps_peak_00095262	5.5078	356	NM_008636	Mtf1	2.41957	3.10599e-06	5.6372e-05	up	17764	MTF-1|Thyls
chr11	100970421	100970780	diffreps_peak_00024274	10.0161	359	ENSMUST00000060792	Ptrf	3.93692	9.63579e-11	2.37769e-08	up	19285	2310075E07Rik|AW546441|Cav-p60|Cavin
chr3	98146361	98147220	diffreps_peak_00086729	6.26968	859	NM_010928	Notch2	3.68694	5.3743e-07	1.30729e-05	up	18129	AI853703|N2
chr14	122479721	122480040	diffreps_peak_00043738	5.93279	319	NM_009574	Zic2	8.90076	1.16739e-06	2.47621e-05	up	22772	HPE5|Ku
chr19	4220681	4221140	diffreps_peak_00067119	10.7438	459	uc008fzl.1	Clcf1	21.3701	1.80386e-11	7.39403e-09	up	56708	BSF-3|Bsf3|CLC|NNT-1
chr1	180333281	180334100	diffreps_peak_00008439	7.69436	819	NM_001081175	Itpkb	2.77613	2.02132e-08	1.09051e-06	up	320404	1110033J02Rik|E130307H12Rik
chr5	37386684	37387140	diffreps_peak_00102216	8.43368	456	uc008xfr.2	Evc2	4.68548	3.68398e-09	3.48034e-07	up	68525	1110017L09Rik|Lbn|limbin
chr19	46005441	46005760	diffreps_peak_00069988	6.56448	319	NM_176785	Hps6	79.5	2.72599e-07	7.57762e-06	up	20170	5330434M19Rik|BLOC2|ru
chr8	45050780	45051300	diffreps_peak_00131237	6.91852	520	NM_001081286	Fat1	2.93147	1.20637e-07	3.99469e-06	up	14107	2310038E12Rik|AU023433|Fath|mFat1
chr10	84756047	84756380	diffreps_peak_00014042	6.61454	333	NM_001024918	Rfx4	5.56566	2.42919e-07	6.93925e-06	up	71137	4933412G19Rik|NYD-sp10
chrY	90785521	90785979	diffreps_peak_00149578	5.35158	458	NM_133362	Erdr1	2.11912	4.45066e-06	7.61317e-05	up	170942	edr
chr14	14104821	14105280	diffreps_peak_00038596	9.0128	459	NM_139227	Atxn7	3.08681	9.70948e-10	1.37395e-07	up	246103	A430107N12Rik|AI627028|Sca7|ataxin-7
chr17	35850301	35850940	diffreps_peak_00058828	5.91614	639	NM_001010833	Mdc1	2.25926	1.21299e-06	2.55383e-05	up	240087	6820401C03|AA413496|Nfbd1|mKIAA0170
chr5	52368321	52369260	diffreps_peak_00102690	9.91601	939	NM_011435	Sod3	2.59257	1.21335e-10	2.83397e-08	up	20657	AI314465|EC-SOD
chr15	76170973	76171300	diffreps_peak_00046756	7.2156	327	NM_011117	Plec	3.45238	6.08694e-08	2.39366e-06	up	18810	AA591047|AU042537|EBS1|PCN|PLTN|Plec1
chr19	57008150	57008575	diffreps_peak_00070684	7.28466	425	NM_146102	Afap1l2	2.61125	5.19203e-08	2.14202e-06	up	226250	AU041783|C86904|mKIAA1914
chr19	24098000	24098315	diffreps_peak_00068707	6.99694	315	NM_011597	Tjp2	2.81544	1.00707e-07	3.48788e-06	up	21873	ZO-2
chr5	124887261	124888060	diffreps_peak_00107433	6.74228	799	NM_001081750	Zfp664	2.10755	1.81018e-07	5.51144e-06	up	269704	AW060232|D930038J03Rik|ZFOC1|Znf664
chr7	101372961	101373501	diffreps_peak_00125410	6.90264	540	NM_001040111	Arap1	2.24348	1.2513e-07	4.12031e-06	up	69710	2410002L19Rik|Centd2|mKIAA0782
chr14	46882853	46883168	diffreps_peak_00040482	10.2162	315	ENSMUST00000022386	Samd4	2.82756	6.07813e-11	1.70801e-08	up	74480	1700024G08Rik|1700111L17Rik|4933436G17Rik|Samd4a|Smaug|Smaug1|sunk
chr4	98115321	98115840	diffreps_peak_00093167	6.19525	519	NM_010905	Nfia	2.2917	6.379e-07	1.49981e-05	up	18027	1110047K16Rik|9430022M17Rik|CTF|NF1-A|NF1A
chr15	76174921	76175320	diffreps_peak_00046757	7.58066	399	NM_011117	Plec	3.282	2.62626e-08	1.30322e-06	up	18810	AA591047|AU042537|EBS1|PCN|PLTN|Plec1
chr4	123410301	123410960	diffreps_peak_00095104	6.00849	659	NM_001167918	D830031N03Rik	2.31714	9.80639e-07	2.14074e-05	up	442834	Kiaa0754|mKIAA0754
chrX	102070681	102071280	diffreps_peak_00147687	8.00593	599	NM_001278534	Rgag4	2.18734	9.8644e-09	6.81345e-07	up	331474	6430402L03Rik|Mar5|Mart5|mKIAA2001
chr11	117232284	117232719	diffreps_peak_00026142	11.9904	435	ENSMUST00000106354	2022-09-09	3.35646	1.02232e-12	1.46099e-09	up	53860	MSF1|Msf|PNUTL4|Sint1
chr1	156036161	156036554	diffreps_peak_00006681	5.56684	393	ENSMUST00000128941	Tor1aip2	2.42814	2.71119e-06	5.01986e-05	up	240832	1110020D10Rik|15kDa|A130072J07|AA103493|AW060462|AW610675|C77739|Ifrg15|Lull1
chr5	130024041	130024460	diffreps_peak_00107788	5.31128	419	ENSMUST00000160129	Asl	2.28476	4.8834e-06	8.24884e-05	up	109900	2510006M18Rik
chr7	6304861	6305280	diffreps_peak_00118582	8.44325	419	NM_001024928	Zfp667	16.6786	3.60373e-09	3.42738e-07	up	384763	A830025F02Rik|Mip1|ZNF667
chr15	93244101	93244580	diffreps_peak_00048877	5.12284	479	NM_001033275	Gxylt1	2.20993	7.53625e-06	0.000119162	up	223827	Glt8d3|Gm1228|Gm87
chr7	139638681	139639041	diffreps_peak_00128266	6.25589	360	NM_001302546	Cfap46	2.14836	5.54762e-07	1.34122e-05	up	212124	9330101J02Rik|E030019B06Rik|Gm170|Ttc40
chr17	35050021	35050400	diffreps_peak_00058676	8.60708	379	ENSMUST00000007257	Clic1	3.63616	2.47126e-09	2.71171e-07	up	114584	Clcp|G6
chr7	116128081	116128400	diffreps_peak_00126442	6.15329	319	uc009jja.1	Plekha7	10.3818	7.02602e-07	1.62726e-05	up	233765	A430081P20Rik|AI414265
chr2	125506181	125506560	diffreps_peak_00077930	5.55654	379	uc008mcp.1	Fbn1	2.54822	2.77623e-06	5.1204e-05	up	14118	AI536462|B430209H23|Fib-1|Tsk
chr10	81399301	81399900	diffreps_peak_00013674	8.73804	599	NM_008688	Nfic	2.20326	1.82795e-09	2.2059e-07	up	18029	1110019L22Rik|1500041O16Rik|AA589446|AI746521|NF1-C
chr11	8450961	8451300	diffreps_peak_00017248	9.74488	339	NM_001083587	Tns3	3.08161	1.79937e-10	3.80983e-08	up	319939	BC023928|F830010I22Rik|TEM6|Tens1
chr7	135698321	135698640	diffreps_peak_00128115	6.21079	319	NM_001081117	Mki67	3.08609	6.15481e-07	1.45764e-05	up	17345	D630048A14Rik|Ki-67|Ki67
chr14	21987621	21987980	diffreps_peak_00039098	5.96364	359	NM_145459	Zfp503	4.30645	1.08734e-06	2.33044e-05	up	218820	AI181838|B830002A16Rik|Nolz-1|Nolz1|Znf503
chr7	143240721	143241160	diffreps_peak_00128608	7.34122	439	uc012fxx.1	Kcnq1ot1	4.65289	4.55806e-08	1.94595e-06	up	63830	Kvlqt1-as|Lit1|Tssc8
chr17	34977381	34977900	diffreps_peak_00058662	7.48595	519	NM_013558	Hspa1l	4.26071	3.26624e-08	1.53517e-06	up	15482	Hsc70t|Msh5
chr19	55908422	55908880	diffreps_peak_00070628	5.15542	458	uc008hya.2	Tcf7l2	3.27105	6.99166e-06	0.000111763	up	21416	TCF4B|TCF4E|Tcf-4|Tcf4|mTcf-4B|mTcf-4E
chr1	170299981	170300480	diffreps_peak_00007600	6.63058	499	NM_001198955	Gm7694	3.16439	2.34111e-07	6.74105e-06	up	665574	EG665574
chr4	45284481	45284860	diffreps_peak_00091283	10.1978	379	NM_001081172	Frmpd1	5.55677	6.34119e-11	1.75215e-08	up	666060	BC031840|mKIAA0967
chr2	125505088	125506080	diffreps_peak_00077929	5.00899	992	ENSMUST00000066157	Gm9913	2.04186	9.79514e-06	0.000149437	up	100036535	ENSMUSG00000053615
chr2	91931929	91932240	diffreps_peak_00076137	6.62893	311	NM_010784	Mdk	8.48171	2.35003e-07	6.76083e-06	up	17242	MK|Mek
chr13	3883121	3883480	diffreps_peak_00033274	6.10421	359	NM_019671	Net1	3.11302	7.86659e-07	1.78709e-05	up	56349	Net1a|mNET1
chr9	56206621	56207440	diffreps_peak_00140797	9.08288	819	NM_172924	Peak1	2.46796	8.26275e-10	1.22151e-07	up	244895	1110049L02Rik|9530046P14|AA690169|BE132841|C230081A13Rik|SGK269|mKIAA2002
chr14	46884181	46884980	diffreps_peak_00040485	7.5283	799	uc007thp.1	Samd4	2.20983	2.9628e-08	1.426e-06	up	74480	1700024G08Rik|1700111L17Rik|4933436G17Rik|Samd4a|Smaug|Smaug1|sunk
chr11	53541881	53542340	diffreps_peak_00019290	7.55648	459	NM_033144	2022-09-08	2.15745	2.77665e-08	1.36011e-06	up	20362	AW046166|Sepl|mKIAA0202
chr16	45094028	45094425	diffreps_peak_00053587	6.39337	397	uc007zif.1	Ccdc80	3.27338	4.04228e-07	1.04001e-05	up	67896	2610001E17Rik|DRO1|Ssg1|Urb
chr10	81350001	81350369	diffreps_peak_00013652	7.20992	368	uc007ghj.2	Hmg20b	3.38794	6.16703e-08	2.41605e-06	up	15353	AW610687|BRAF35|Hmgx2|Hmgxb2|Smarce1r
chr2	65097901	65098620	diffreps_peak_00074962	9.63494	719	NM_027225	Cobll1	3.37885	2.31773e-10	4.54816e-08	up	319876	1810047P18Rik|Coblr1|D430044D16Rik
chr6	97153761	97154160	diffreps_peak_00115091	7.32265	399	NM_001081111	Tmf1	4.55703	4.75714e-08	2.00761e-06	up	232286	7030402D04Rik|Gm153|Tmf1`
chr17	46499121	46499480	diffreps_peak_00059442	7.73753	359	NM_207161	Dnph1	86.3	1.83006e-08	1.01843e-06	up	381101	C76683|Rcl
chrX	52164761	52165252	diffreps_peak_00146458	6.86516	491	ENSMUST00000033450	Gpc4	3.66157	1.36407e-07	4.4111e-06	up	14735	9530073D23Rik|AF311610|AI385680|AI661372|K-glypican
chr17	27019809	27020480	diffreps_peak_00057468	8.56337	671	ENSMUST00000078691	Bak1	2.09269	2.73294e-09	2.901e-07	up	12018	Bak|N-BAK1|N-Bak
chr12	30015861	30016260	diffreps_peak_00028335	6.8099	399	NM_181395	Pxdn	2.78148	1.54916e-07	4.85302e-06	up	69675	2310075M15Rik|C85409|E330004E07|VPO1|mKIAA0230
chr9	35187481	35187930	diffreps_peak_00139123	12.096	449	NM_054096	Tirap	3.84462	8.0163e-13	1.32602e-09	up	117149	AA407980|C130027E04Rik|Mal|Tlr4ap|Wyatt
chr16	92498621	92499100	diffreps_peak_00055198	7.42667	479	NM_172469	Clic6	3.83642	3.74391e-08	1.68465e-06	up	209195	5730466J16Rik|AL022908|AW045520|CLIC1L
chr19	5637482	5637841	diffreps_peak_00067400	5.5834	359	ENSMUST00000025867	Rela	2.25169	2.60978e-06	4.85476e-05	up	19697	p65
chr11	71019461	71019841	diffreps_peak_00021201	7.47726	380	NM_001291146	Derl2	2.97926	3.33226e-08	1.55369e-06	up	116891	CGI-101|Derlin-2|F-lana|Flana
chrY	90793295	90793680	diffreps_peak_00149579	5.74079	385	ENSMUST00000179077	Erdr1	2.04833	1.81639e-06	3.58814e-05	up	170942	edr
chr8	66703901	66704260	diffreps_peak_00132108	7.21293	359	NM_010934	Npy1r	18.0794	6.12447e-08	2.4046e-06	up	18166	Npyr|Y1-R
chr7	128010441	128010860	diffreps_peak_00127643	7.35398	419	NM_001079932	Trim72	89.5	4.42606e-08	1.90624e-06	up	434246	BC067209|MG53
chr4	154528581	154528900	diffreps_peak_00099246	8.0268	319	NM_027504	Prdm16	2.8636	9.40157e-09	6.62573e-07	up	70673	5730557K01Rik|csp1|mel1
chr9	114747401	114747740	diffreps_peak_00144778	5.29423	339	NM_026036	Cmtm6	2.75093	5.07885e-06	8.52312e-05	up	67213	2810051A14Rik|AA536733|Cklfsf6
chr16	93900924	93901356	diffreps_peak_00055251	5.99861	432	NM_028083	Chaf1b	3.6753	1.00322e-06	2.18234e-05	up	110749	2600017H24Rik|C76145|CAF-I p60|CAF-Ip60|CAF1|CAF1A|CAF1P60|MPHOSPH7
chr15	79996401	79996740	diffreps_peak_00047452	5.24716	339	NM_011057	Pdgfb	3.95248	5.66028e-06	9.32686e-05	up	18591	PDGF-B|Sis
chr3	79622161	79622480	diffreps_peak_00084935	8.75239	319	uc008pnt.2	Etfdh	10.8905	1.76851e-09	2.14987e-07	up	66841	0610010I20Rik|AV001013
chr2	20744021	20744360	diffreps_peak_00071973	6.2993	339	uc008imk.1	Etl4	3.13858	5.01998e-07	1.23624e-05	up	208618	6620402G01Rik|9430077C05Rik|BC026657|E330027G05Rik|Etl-4|Skt
chr1	91114981	91115920	diffreps_peak_00004137	6.64504	939	NM_001111311	Lrrfip1	2.3291	2.26441e-07	6.55443e-06	up	16978	AU024550|Fliiap1
chr8	120568160	120568483	diffreps_peak_00136281	8.35115	323	NM_198671	Gse1	2.38441	4.45505e-09	3.93571e-07	up	382034	2210013I18Rik|mKIAA0182
chr3	142241801	142242200	diffreps_peak_00088590	5.45381	399	NM_019808	Pdlim5	3.88642	3.51718e-06	6.24523e-05	up	56376	1110001A05Rik|AI987914|C87059|Enh|Enh1|Enh2|Enh3|LIM
chr19	6992158	6992460	diffreps_peak_00067796	5.63939	302	ENSMUST00000025915	Dnajc4	5.57295	2.29411e-06	4.37628e-05	up	57431	2010301J22Rik|Hspf2|Mcg18
chr4	123471501	123471860	diffreps_peak_00095110	6.62142	359	NM_001199136	Macf1	3.53663	2.39102e-07	6.84593e-06	up	11426	ABP620|Acf7|Aclp7|MACF|R74989|mKIAA0465
chr11	119027898	119028300	diffreps_peak_00026525	7.04084	402	NM_007623	Cbx2	2.75092	9.10245e-08	3.24152e-06	up	12416	M33|MOD2|pc
chr13	21753376	21753680	diffreps_peak_00034020	5.27268	304	NM_178183	Hist1h2ak	2.24781	5.33733e-06	8.89042e-05	up	319169	-
chr19	3876981	3877540	diffreps_peak_00067036	8.22382	559	uc008fxf.1	Chka	5.92097	5.9728e-09	4.85477e-07	up	12660	CK|CK/EK-alpha|Chetk-alpha|Chk|ChoK|EK|EtnK-alpha
chr11	96961037	96961360	diffreps_peak_00023573	6.21434	323	NM_030220	Sp2	2.65413	6.1047e-07	1.44698e-05	up	78912	4930480I16Rik|mKIAA0048
chr17	26922904	26923302	diffreps_peak_00057405	7.05936	398	NM_053173	Kifc5b	2.47237	8.72241e-08	3.13545e-06	up	16580	Hset|KNSL2|Kifc5a
chr2	73276981	73277300	diffreps_peak_00075412	5.18433	319	ENSMUST00000090813	Sp9	7.20382	6.54144e-06	0.000105415	up	381373	-
chr8	78509361	78509674	diffreps_peak_00133105	7.29502	313	NM_029736	Slc10a7	2.48409	5.06962e-08	2.1051e-06	up	76775	2410193C02Rik|P7
chr1	59484601	59485020	diffreps_peak_00002320	6.69148	419	NM_008057	Fzd7	3.35616	2.03479e-07	6.05226e-06	up	14369	Fz7
chr18	4673081	4673420	diffreps_peak_00062324	8.76017	339	NM_001081963	9430020K01Rik	3.74666	1.73713e-09	2.12082e-07	up	240185	1110056P05Rik|Gm328|Jcad|mKIAA1462
chr15	99780421	99780760	diffreps_peak_00049572	6.29844	339	NM_023063	Lima1	2.18163	5.02985e-07	1.23822e-05	up	65970	Eplin
chr13	103833901	103834260	diffreps_peak_00037600	7.83854	359	NM_001005868	Erbb2ip	3.34357	1.4503e-08	8.72434e-07	up	59079	1700028E05Rik|Erbin|mKIAA1225
chr2	59842694	59843040	diffreps_peak_00074800	7.13962	346	NM_198294	Tanc1	3.95175	7.25063e-08	2.74765e-06	up	66860	1200003E16Rik|Tanc|mKIAA1728
chr7	141010396	141010770	diffreps_peak_00128357	6.44791	374	ENSMUST00000026565	Ifitm3	3.77402	3.56525e-07	9.42462e-06	up	66141	1110004C05Rik|Cd225|Cdw217|DSPA2b|Fgls|IP15|mil-1
chr15	88914001	88914400	diffreps_peak_00048508	7.54444	399	NM_172818	Ttll8	7.96262	2.85468e-08	1.38539e-06	up	239591	1700019P01Rik|4933401B17
chr7	15987478	15987800	diffreps_peak_00118827	7.1881	322	NM_001081418	Gltscr1	2.42488	6.48478e-08	2.50834e-06	up	243842	-
chr2	137116176	137116620	diffreps_peak_00078717	8.01195	444	ENSMUST00000028735	Jag1	3.13626	9.72866e-09	6.765e-07	up	16449	ABE2|Gsfabe2|Htu|Ozz|Ser-1
chr9	67023161	67023480	diffreps_peak_00141894	7.28585	319	ENSMUST00000113690	Tpm1	2.7982	5.17786e-08	2.13832e-06	up	22003	AA986836|AI854628|TM2|Tm3|Tmpa|Tpm-1|alpha-TM
chr4	108555381	108555700	diffreps_peak_00094083	6.64383	319	NM_175472	Zcchc11	2.3264	2.27077e-07	6.57093e-06	up	230594	6030404K05Rik|9230115F04Rik|PPAPD3|mKIAA0191
chr6	125145441	125145860	diffreps_peak_00116936	7.56359	419	NM_178787	Iffo1	3.23454	2.73156e-08	1.34438e-06	up	320678	4733401N06Rik|A930037G23Rik|HOM-TES-103|Iffo
chr12	81026807	81027158	diffreps_peak_00030394	8.37413	351	NM_022316	Smoc1	3.20517	4.22541e-09	3.8177e-07	up	64075	2600002F22Rik|AI848508|SRG
chr12	98688681	98689100	diffreps_peak_00031611	6.03013	419	NM_011877	Ptpn21	2.80989	9.32969e-07	2.05135e-05	up	24000	PTPD1|PTPRL10
chr6	29461361	29461780	diffreps_peak_00111310	8.15612	419	NM_001081185	Flnc	3.92706	6.98036e-09	5.41379e-07	up	68794	1110055E19Rik|ABP-280|ABPL|Fln2
chr10	127666375	127666710	diffreps_peak_00016371	5.69044	335	ENSMUST00000026469	Nab2	2.70424	2.03968e-06	3.95636e-05	up	17937	AI451907
chr11	90661755	90662120	diffreps_peak_00023163	11.752	365	uc007kxa.1	Tom1l1	3.11611	1.77002e-12	1.96568e-09	up	71943	2310045L10Rik|C80573|Srcasm
chr2	73436953	73437520	diffreps_peak_00075425	8.15937	567	NM_153138	Wipf1	2.36981	6.92838e-09	5.38608e-07	up	215280	AI115543|D2Ertd120e|WIP|Waspip
chr1	134040215	134040960	diffreps_peak_00005825	8.70222	745	NM_021355	Fmod	3.82275	1.9851e-09	2.33172e-07	up	14264	AI131919|AU041740|SLRR2E
chr2	72405821	72406160	diffreps_peak_00075369	7.17046	339	NM_001164791	Zak	3.75086	6.75366e-08	2.59113e-06	up	65964	AV006891|B230120H23Rik|MLTK|MLTKalpha|MLTKbeta
chr7	109556210	109556560	diffreps_peak_00125844	11.6157	350	NM_001001326	St5	3.82863	2.42249e-12	2.23536e-09	up	76954	2010004M01Rik|2610305K15Rik
chr7	28360701	28361060	diffreps_peak_00120355	8.65436	359	NM_138752	Plekhg2	4.6299	2.21638e-09	2.52963e-07	up	101497	AI194308|Clg|Cslg
chr12	91637921	91638360	diffreps_peak_00031510	6.75261	439	NM_175367	Ston2	3.06703	1.76763e-07	5.39845e-06	up	108800	4933401N24Rik|AI425999|AW544599
chr3	108387598	108387980	diffreps_peak_00087413	11.9979	382	NM_019976	Psrc1	4.13007	1.00488e-12	1.46099e-09	up	56742	5430413I02Rik|AL033312|Dda3
chr9	30942921	30943600	diffreps_peak_00138834	6.65334	679	NM_013906	Adamts8	2.22059	2.22159e-07	6.4616e-06	up	30806	METH-2|METH2
chr1	86045862	86046360	diffreps_peak_00003667	11.0362	498	NM_001144992	2810459M11Rik	4.31569	9.2012e-12	4.92034e-09	up	72792	-
chr1	172370841	172371340	diffreps_peak_00007887	11.5524	499	NM_001039484	Kcnj10	4.48878	2.80317e-12	2.40747e-09	up	16513	BIR10|BIRK-1|Kir1.2|Kir4.1
chr10	78585561	78585911	diffreps_peak_00012981	11.6117	350	NM_027875	Syde1	3.17613	2.44495e-12	2.24564e-09	up	71709	1200008N06Rik|BB043000|mSYD1A
chr11	70725961	70726502	diffreps_peak_00021165	6.10086	541	NM_153103	Kif1c	2.52413	7.92754e-07	1.79821e-05	up	16562	B430105J22Rik|D11Bwg1349e|Ltxs1|Orch3
chr13	51408617	51408945	diffreps_peak_00035326	10.3521	328	NM_010101	S1pr3	3.00439	4.44551e-11	1.3759e-08	up	13610	AI132464|Edg3|Lpb3|S1p3
chr11	102802840	102803540	diffreps_peak_00024576	9.81818	700	uc029roh.1	Gjc1	2.60164	1.51991e-10	3.33871e-08	up	14615	C130009G16Rik|Cnx45|Cx45|Gja-7|Gja7
chr9	67049021	67049406	diffreps_peak_00141906	8.67722	385	ENSMUST00000113707	Tpm1	5.58705	2.10272e-09	2.43244e-07	up	22003	AA986836|AI854628|TM2|Tm3|Tmpa|Tpm-1|alpha-TM
chr3	63381461	63381820	diffreps_peak_00084523	7.20191	359	NM_008604	Mme	85.9	6.28192e-08	2.44898e-06	up	17380	6030454K05Rik|C85356|CALLA|CD10|NEP|SFE
chr1	74396401	74396780	diffreps_peak_00003124	11.8967	379	NM_153088	Ctdsp1	3.56869	1.26844e-12	1.59554e-09	up	227292	GIP|NLIIF|Nif3|SCP1
chr14	101608121	101608440	diffreps_peak_00042834	6.48839	319	NM_001081278	Tbc1d4	28.1212	3.24797e-07	8.73724e-06	up	210789	5930406J04Rik|A930035N22|AV295684|As160
chr7	109557161	109557461	diffreps_peak_00125845	7.73324	300	NM_001001326	St5	3.7453	1.84825e-08	1.02596e-06	up	76954	2010004M01Rik|2610305K15Rik
chr5	137600270	137600708	diffreps_peak_00108931	5.07051	438	NM_001254762	Mospd3	2.20605	8.5014e-06	0.00013231	up	68929	1190005J19Rik|5133401H10Rik|Gtig2|R124
chr19	38395979	38396301	diffreps_peak_00069369	7.12192	322	NM_175507	Slc35g1	5.69883	7.55228e-08	2.83833e-06	up	240660	AA590464|D330039I19Rik|Tmem20
chr15	78849164	78849560	diffreps_peak_00047163	10.6289	396	NM_027219	Cdc42ep1	2.98069	2.34997e-11	8.8803e-09	up	104445	1810058K22Rik|AA980734|Borg5|CEP1|MSE55
chr17	44735361	44736460	diffreps_peak_00059190	8.32728	1099	NM_001145920	Runx2	3.13767	4.7067e-09	4.09729e-07	up	12393	AML3|Cbf|Cbfa-1|Cbfa1|LS3|Osf2|PEBP2aA|Pebp2a1|Pebpa2a
chr18	80971761	80972180	diffreps_peak_00066695	8.39513	419	NM_178280	Sall3	2.29859	4.02599e-09	3.69609e-07	up	20689	B130022O04Rik|Msal|Msal-1|Sal|Salt|Spalt
chrX	130464161	130464820	diffreps_peak_00148167	6.46613	659	NM_172493	Diap2	6.10782	3.41875e-07	9.11306e-06	up	NA	NA
chr12	86078721	86079041	diffreps_peak_00031074	8.42827	320	NM_009368	Tgfb3	3.62876	3.73017e-09	3.51561e-07	up	21809	TGF-beta-3|Tgfb-3
chr13	98815075	98815400	diffreps_peak_00037360	10.0778	325	NM_172591	Fcho2	2.09739	8.36027e-11	2.13189e-08	up	218503	5832424M12Rik|AA387320
chr8	46846301	46847020	diffreps_peak_00131389	7.89963	719	NM_008391	Irf2	2.26869	1.25999e-08	7.97192e-07	up	16363	9830146E22Rik|AI646973|Irf-2
chr10	4356241	4357060	diffreps_peak_00009331	8.57186	819	NM_031185	Akap12	3.64592	2.68001e-09	2.86472e-07	up	83397	AI317366|SSeCKS|Srcs5|Tsga12
chr15	57821821	57822220	diffreps_peak_00045781	8.77251	399	NM_199449	Zhx2	3.29159	1.68847e-09	2.07804e-07	up	387609	Afr-1|Afr1|Raf|mKIAA0854
chr14	28505761	28506080	diffreps_peak_00039646	10.3221	319	NM_009524	Wnt5a	3.99325	4.76276e-11	1.42733e-08	up	22418	8030457G12Rik|Wnt-5a
chr8	45044141	45044554	diffreps_peak_00131233	10.3445	413	NM_001081286	Fat1	2.96067	4.52423e-11	1.38301e-08	up	14107	2310038E12Rik|AU023433|Fath|mFat1
chr16	39025981	39026360	diffreps_peak_00053103	7.43899	379	NM_170599	Igsf11	2.60188	3.63923e-08	1.65257e-06	up	207683	1700025L02Rik|BT-IgSF|Igsf13
chr9	65136021	65136520	diffreps_peak_00141676	10.5585	499	NM_020043	Igdcc4	3.09711	2.76353e-11	9.66954e-09	up	56741	DDM36|Nope
chr1	171126563	171126940	diffreps_peak_00007712	10.1843	377	NM_001081275	Cfap126	4.93594	6.54171e-11	1.79257e-08	up	75472	1700009P17Rik|AV282292|Flattop|Fltp
chr11	101525101	101525540	diffreps_peak_00024368	6.72668	439	NM_009764	Brca1	4.88228	1.87637e-07	5.66773e-06	up	12189	-
chr4	63225041	63225520	diffreps_peak_00092184	7.23957	479	NM_025685	Col27a1	6.08994	5.76008e-08	2.30115e-06	up	373864	5730512J02Rik|AI449266
chr10	17799141	17799533	diffreps_peak_00009924	5.40511	392	NM_138628	Txlnb	2.06818	3.93454e-06	6.85744e-05	up	378431	2310001N14Rik|Mdp77
chr13	51847868	51848380	diffreps_peak_00035435	10.5114	512	NM_011817	Gadd45g	3.17063	3.08057e-11	1.0483e-08	up	23882	AI327420|C86281|CR6|DDIT2|OIG37
chr5	114911841	114912220	diffreps_peak_00105968	7.34596	379	NM_011854	Oasl2	6.28497	4.5086e-08	1.9294e-06	up	23962	M1204|Mmu-OASL|Oasl
chr4	133198941	133199320	diffreps_peak_00096625	8.72068	379	ENSMUST00000084241	Wasf2	6.16197	1.90249e-09	2.26282e-07	up	242687	AW742646|D4Ertd13e|WAVE2
chr14	12344861	12345220	diffreps_peak_00038473	5.45809	359	NM_080433	Fezf2	3.34126	3.48265e-06	6.19168e-05	up	54713	AI451466|AI852056|Fez|Fezl|Zfp312
chr10	87491321	87491960	diffreps_peak_00014286	5.69963	639	NM_008553	Ascl1	2.92798	1.99697e-06	3.88757e-05	up	17172	AI225900|ASH1|Mash1|bHLHa46
chr10	105370441	105370778	diffreps_peak_00014928	7.22163	337	NM_177368	Tmtc2	5.48837	6.00296e-08	2.36956e-06	up	278279	8430438D04Rik|D330034A10Rik
chr7	128545589	128546160	diffreps_peak_00127679	6.95294	571	NM_013863	Bag3	2.56958	1.11445e-07	3.76337e-06	up	29810	AA407278|Bis|mg638
chr18	34862821	34863380	diffreps_peak_00063681	7.92062	559	NM_007913	Egr1	2.72275	1.20056e-08	7.74057e-07	up	13653	A530045N19Rik|ETR103|Egr-1|Krox-1|Krox-24|Krox24|NGF1-A|NGFI-A|NGFIA|TIS8|Zenk|Zfp-6|Zif268|egr
chr10	13128561	13129160	diffreps_peak_00009808	5.04088	599	NM_009538	Plagl1	2.24619	9.1016e-06	0.000140597	up	22634	Lot1|Zac1
chr17	34996723	34997220	diffreps_peak_00058666	5.39864	497	NM_033075	D17H6S56E-5	2.88004	3.99353e-06	6.94376e-05	up	110956	G7e
chr4	97777607	97777994	diffreps_peak_00093135	7.47856	387	ENSMUST00000075448	Nfia	3.07377	3.3223e-08	1.5505e-06	up	18027	1110047K16Rik|9430022M17Rik|CTF|NF1-A|NF1A
chr19	17122301	17122720	diffreps_peak_00068483	6.76887	419	NM_181348	Prune2	2.72734	1.70268e-07	5.238e-06	up	353211	6330414G02Rik|A230083H22Rik|A330102H22Rik|Bmcc1|mKIAA0367
chr5	147190641	147190947	diffreps_peak_00110105	8.03964	306	ENSMUST00000065382	Gsx1	7.84437	9.12757e-09	6.4858e-07	up	14842	Gsh-1|Gsh1
chr10	60357841	60358160	diffreps_peak_00011794	7.90423	319	NM_028732	4632428N05Rik	9.26263	1.24672e-08	7.91772e-07	up	NA	NA
chr9	50753081	50753477	diffreps_peak_00140528	7.71659	396	NM_009964	Cryab	4.97084	1.9205e-08	1.05085e-06	up	12955	Crya-2|Crya2|HspB5|P23
chr11	116335061	116335560	diffreps_peak_00026009	10.3551	499	uc007mkw.1	Foxj1	3.48644	4.41442e-11	1.37098e-08	up	15223	FKHL-13|HFH-4|Hfh4
chr7	24926241	24926592	diffreps_peak_00119678	6.31752	351	ENSMUST00000117419	Arhgef1	4.20489	4.81375e-07	1.19415e-05	up	16801	Lbcl2|Lsc
chr13	93096621	93096980	diffreps_peak_00037080	6.96127	359	NM_023821	Cmya5	12.5444	1.09327e-07	3.70953e-06	up	76469	2310076E16Rik|2310076E21Rik|AA420382|AI504003|Srfsd|Tims|sr553
chrX	152660141	152660460	diffreps_peak_00148916	10.8194	319	NM_172441	Shroom2	3.022	1.51557e-11	6.63748e-09	up	110380	4832440C16|Apxl|C630003H05Rik|Shrm2
chr3	37310292	37310700	diffreps_peak_00083757	6.89629	408	ENSMUST00000140956	Cetn4	2.06236	1.26971e-07	4.16571e-06	up	207175	-
chr1	34190081	34190420	diffreps_peak_00001078	6.90282	339	NM_134448	Dst	3.52237	1.25079e-07	4.11999e-06	up	13518	2310001O04Rik|A830042E19Rik|AW554249|BP230|BPAG1-n|Bpag|Bpag1|Macf2|ah|athetoid|dt|mKIAA0728|nmf203|nmf339
chr7	45522916	45523322	diffreps_peak_00121857	7.81729	406	NM_008654	Ppp1r15a	2.78265	1.52305e-08	8.99374e-07	up	17872	9630030H21|Gadd34|Myd116
chr7	25225381	25225740	diffreps_peak_00119800	6.57027	359	NM_175436	Zfp526	3.3617	2.68987e-07	7.50372e-06	up	210172	D030024H03Rik|Znf526
chr17	35058361	35058749	diffreps_peak_00058678	8.5547	388	ENSMUST00000007257	Clic1	3.96566	2.78801e-09	2.90779e-07	up	114584	Clcp|G6
chr11	116331001	116331360	diffreps_peak_00026004	11.0681	359	NM_008240	Foxj1	3.05032	8.54803e-12	4.79057e-09	up	15223	FKHL-13|HFH-4|Hfh4
chr5	137109241	137109680	diffreps_peak_00108834	7.07607	439	ENSMUST00000054384	Trim56	4.15275	8.39319e-08	3.04752e-06	up	384309	A130009K11Rik|Gm452|RNF109
chr9	71724477	71724800	diffreps_peak_00142257	12.8222	323	NM_026599	Cgnl1	6.00657	1.50577e-13	8.98318e-10	up	68178	4933421H10Rik|9930020M10Rik|AI503810|Jacop
chr5	137113681	137114020	diffreps_peak_00108839	5.90334	339	NM_201373	Trim56	3.12676	1.24928e-06	2.62022e-05	up	384309	A130009K11Rik|Gm452|RNF109
chr3	90225508	90225980	diffreps_peak_00085974	6.22551	472	NM_026677	Rab13	2.45025	5.94957e-07	1.41613e-05	up	68328	0610007N03Rik|B230212B15Rik
chr8	31820981	31821340	diffreps_peak_00130786	9.11155	359	uc009ljq.1	Nrg1	3.07615	7.73474e-10	1.16599e-07	up	211323	6030402G23Rik|ARIA|D230005F13Rik|GGF|GGFII|HRG|HRGalpha|Hgl|NDF|SMDF
chr6	22875501	22875884	diffreps_peak_00111064	9.59205	383	NM_001081306	Ptprz1	2.29746	2.55831e-10	4.93244e-08	up	19283	AI850339|DSD-1-PG|PTPbeta|PTPzeta|Ptprz|Ptpz|R-PTP-zeta|RPTPz|Rptpbeta
chr11	60206837	60207160	diffreps_peak_00019959	6.72469	323	NM_011480	Srebf1	2.07902	1.88499e-07	5.68857e-06	up	20787	ADD1|SREBP-1a|SREBP1|SREBP1c|bHLHd1
chr11	120230221	120230640	diffreps_peak_00026802	7.29842	419	uc011yix.2	2900052L18Rik	5.78289	5.03018e-08	2.09565e-06	up	76835	-
chr7	45216981	45217450	diffreps_peak_00121743	9.94136	469	uc009guf.1	Tead2	3.02406	1.14457e-10	2.71904e-08	up	21677	ETF|Etdf|TEAD-2|TEF-4|TEF4
chr6	48833810	48834139	diffreps_peak_00112671	6.85963	329	NM_001164209	Tmem176b	4.19106	1.38156e-07	4.44898e-06	up	65963	1810009M01Rik|Clast1|Lr8
chr14	54431603	54431973	diffreps_peak_00040810	8.48279	370	NM_008608	Mmp14	3.15304	3.29013e-09	3.2123e-07	up	17387	AI325305|MMP-X1|MT-MMP-1|MT1-MMP|sabe
chr9	37385801	37386380	diffreps_peak_00139262	7.45086	579	NM_175189	Hepacam	2.41355	3.54112e-08	1.62135e-06	up	72927	2900042E01Rik|Glialcam|Hepn1
chr16	10840901	10841240	diffreps_peak_00050905	6.29165	339	NM_001162932	Rmi2	27.2424	5.10915e-07	1.25416e-05	up	223970	A630055G03Rik|Gm537|Gm929
chr18	80635581	80636076	diffreps_peak_00066656	12.2218	495	NM_001164110	Nfatc1	4.21528	6.00076e-13	1.14953e-09	up	18018	2210017P03Rik|AI449492|AV076380|NF-ATc|NFAT2|NFATc|Nfatcb
chr15	97969921	97970280	diffreps_peak_00049216	7.21072	359	NM_201359	Tmem106c	3.43808	6.15574e-08	2.41497e-06	up	380967	AI046681|BC046621|D15Ertd405e
chr6	112627041	112627500	diffreps_peak_00115513	5.29612	459	uc009dee.1	Rad18	4.20055	5.05679e-06	8.4897e-05	up	58186	2810024C04Rik|Rad18sc
chr13	63533263	63533666	diffreps_peak_00036244	6.23214	403	NM_008957	Ptch1	2.60623	5.85944e-07	1.39972e-05	up	19206	A230106A15Rik|Ptc|Ptc1|Ptch|mes
chr4	137569541	137570020	diffreps_peak_00097229	11.5709	479	NM_008305	Hspg2	3.34408	2.68584e-12	2.32409e-09	up	15530	AI852380|Pcn|Plc|per
chr15	31273196	31273540	diffreps_peak_00044959	7.81613	344	NM_146057	Dap	4.35971	1.5271e-08	9.01146e-07	up	223453	4921531N22Rik|AI789753|AU040360
chr11	100422461	100422945	diffreps_peak_00024189	5.17669	484	NM_026561	Nt5c3b	3.35765	6.65741e-06	0.000107067	up	68106	2610037D24Rik|AI841843|C330027I04Rik|Nt5c3l
chr3	53477482	53477880	diffreps_peak_00084115	6.9468	398	NM_173382	Proser1	2.51343	1.13032e-07	3.80336e-06	up	212127	2810046L04Rik|9330161F11
chr6	145815301	145815942	diffreps_peak_00117900	6.39988	641	NM_027760	Rassf8	2.0816	3.98216e-07	1.02775e-05	up	71323	5133400D11Rik|AA815821|AW123240|Hoj1|mHoj-1
chr8	107293469	107293898	diffreps_peak_00135195	5.74655	429	NM_018823	Nfat5	2.3448	1.79246e-06	3.54616e-05	up	54446	AI225870|B130038B15Rik|CAG-8|CAG80|NFATL1|OREBP|TonEBP|mKIAA0827|nfatz
chr9	67983581	67983900	diffreps_peak_00141971	5.60944	319	uc009qmt.1	Vps13c	13.6508	2.4579e-06	4.61463e-05	up	320528	AI552542|AV026040|C230055H22Rik|W51662|chorein
chr11	100957641	100958100	diffreps_peak_00024270	10.0487	459	NM_008986	Ptrf	2.92146	8.93966e-11	2.25645e-08	up	19285	2310075E07Rik|AW546441|Cav-p60|Cavin
chr1	133914444	133914960	diffreps_peak_00005821	6.41095	516	NM_054077	Prelp	2.99292	3.88194e-07	1.0065e-05	up	116847	7330409J17Rik|SLRR2A
chr2	174427661	174427982	diffreps_peak_00081774	7.55406	321	NM_022325	Ctsz	2.78678	2.79219e-08	1.36508e-06	up	64138	AI787083|AU019819|CTSX|D2Wsu143e
chr6	34741788	34742180	diffreps_peak_00111781	7.29941	392	uc009bhh.1	Cald1	3.71806	5.01869e-08	2.09262e-06	up	109624	4833423D12Rik|AI195384|AV071549|AW536160|C920027I18Rik
chr4	152107941	152108540	diffreps_peak_00098986	5.58409	599	uc008vzj.2	Plekhg5	2.28436	2.60563e-06	4.84839e-05	up	269608	BC023181|Syx
chr1	172001341	172002180	diffreps_peak_00007790	8.46338	839	ENSMUST00000027837	Vangl2	2.51886	3.4405e-09	3.31343e-07	up	93840	C530001F03Rik|Lootl|Lp|Lpp1|Ltap|Vang1l2|loop-tail|ska17|ska<m17Jus>|stbm|strabismus
chr1	135324901	135325270	diffreps_peak_00005947	7.2508	369	NM_053106	Lmod1	5.64799	5.61312e-08	2.25699e-06	up	93689	9530015K06Rik|SM-Lmod
chr15	100260121	100260560	diffreps_peak_00049638	7.77061	439	NM_007497	Atf1	4.82953	1.69586e-08	9.66797e-07	up	11908	-
chr14	57699621	57699960	diffreps_peak_00041205	7.29583	339	NM_015771	Lats2	3.63077	5.06028e-08	2.10333e-06	up	50523	4932411G09Rik|AV277261|AW228608
chr9	60871321	60872200	diffreps_peak_00141315	8.09619	879	NM_028283	Uaca	3.58562	8.01337e-09	5.94334e-07	up	72565	2700059D02Rik|nucling
chr9	60869781	60870780	diffreps_peak_00141314	7.4156	999	NM_028283	Uaca	3.58323	3.8406e-08	1.71812e-06	up	72565	2700059D02Rik|nucling
chr5	37370523	37370848	diffreps_peak_00102210	7.67664	325	NM_145920	Evc2	2.39333	2.10554e-08	1.1202e-06	up	68525	1110017L09Rik|Lbn|limbin
chr9	91365161	91365799	diffreps_peak_00143017	10.0003	638	NM_009573	Zic1	2.01382	9.99382e-11	2.45383e-08	up	22771	ZIC|ZNF201
chr7	28377661	28378120	diffreps_peak_00120366	6.67335	459	NM_011756	Zfp36	4.1569	2.12153e-07	6.25029e-06	up	22695	Gos24|Nup475|TIS11D|TISII|Tis11|Ttp|Zfp-36
chr4	8866341	8866740	diffreps_peak_00089593	6.61903	399	NM_001277149	Chd7	3.32079	2.40419e-07	6.87379e-06	up	320790	A730019I05Rik|Cycn|Cyn|Dz|Edy|Flo|GENA 47|GENA 60|Gena 52|Lda|Mt|Obt|Todo|WBE1|Whi|metis
chr9	37384508	37384840	diffreps_peak_00139261	7.01707	332	NM_175189	Hepacam	2.97749	9.61447e-08	3.3734e-06	up	72927	2900042E01Rik|Glialcam|Hepn1
chr10	126890221	126890740	diffreps_peak_00016118	7.37269	519	uc007hhh.2	Xrcc6bp1	5.97595	4.23941e-08	1.84404e-06	up	68876	1110068E08Rik|2410012H02Rik
chr10	42196961	42197760	diffreps_peak_00011006	10.3319	799	NM_019740	Foxo3	2.2826	4.65667e-11	1.41129e-08	up	56484	1110048B16Rik|2010203A17Rik|C76856|FKHRL1|Fkhr2|Foxo3a
chr7	142658381	142659160	diffreps_peak_00128576	7.21985	779	ENSMUST00000121128	Igf2	3.16712	6.02773e-08	2.37422e-06	up	16002	AL033362|Igf-2|Igf-II|M6pr|Mpr|Peg2
chr1	135363669	135364420	diffreps_peak_00005948	10.306	751	NM_053106	Lmod1	4.56165	4.94273e-11	1.46796e-08	up	93689	9530015K06Rik|SM-Lmod
chr7	141442021	141442564	diffreps_peak_00128416	8.6786	543	uc012fxc.1	Lrdd	5.28286	2.09603e-09	2.43002e-07	up	NA	NA
chr4	8751661	8752840	diffreps_peak_00089566	9.20938	1179	NM_001277149	Chd7	3.23398	6.1747e-10	9.85755e-08	up	320790	A730019I05Rik|Cycn|Cyn|Dz|Edy|Flo|GENA 47|GENA 60|Gena 52|Lda|Mt|Obt|Todo|WBE1|Whi|metis
chr2	31031801	31032140	diffreps_peak_00073081	8.05351	339	ENSMUST00000073879	Fnbp1	6.81818	8.84071e-09	6.35481e-07	up	14269	1110057E06Rik|2210010H06Rik|FBP1|Fbp17
chr19	44931118	44931420	diffreps_peak_00069849	6.6076	302	NM_001081225	Fam178a	2.05904	2.46829e-07	7.02769e-06	up	226151	3632432H19|6030443O07Rik|AU014917|Slf2
chr15	76178781	76181899	diffreps_peak_00046759	8.75429	3118	NM_011117	Plec	2.08976	1.76081e-09	2.14445e-07	up	18810	AA591047|AU042537|EBS1|PCN|PLTN|Plec1
chr5	28466481	28467000	diffreps_peak_00101095	9.52611	519	NM_009170	Shh	3.4862	2.97776e-10	5.56174e-08	up	20423	9530036O11Rik|Dsh|Hhg1|Hx|Hxl3|M100081
chr9	58884469	58884840	diffreps_peak_00141141	8.32759	371	uc009pxj.1	Neo1	2.34019	4.70337e-09	4.09618e-07	up	18007	2610028H22Rik|AI327052|D930014N22Rik|Igdcc2
chr1	186705681	186705992	diffreps_peak_00008821	10.3995	311	NM_009367	Tgfb2	2.45762	3.98567e-11	1.26314e-08	up	21808	BB105277|Tgf-beta2|Tgfb-2
chr5	92942361	92942680	diffreps_peak_00104218	6.98051	319	NM_015756	Shroom3	3.6518	1.0459e-07	3.5788e-06	up	27428	AL022960|D5Ertd287e|Shrm|Shrm3
chr7	102494221	102494773	diffreps_peak_00125595	6.14432	552	NM_146840	Olfr545	3.62822	7.17267e-07	1.65561e-05	up	258837	MOR42-1|S50
chr19	7274441	7275220	diffreps_peak_00067889	11.6221	779	NM_054048	Rcor2	3.16805	2.38748e-12	2.23536e-09	up	104383	1A13|AW122124|CoREST|Rcor|Rcor1
chr3	89393041	89393362	diffreps_peak_00085812	11.1074	321	ENSMUST00000029677	Zbtb7b	3.98369	7.80851e-12	4.59687e-09	up	22724	Thpok|Zfp67|c-Krox
chr4	123664465	123664780	diffreps_peak_00095151	6.95367	315	uc008upq.1	Macf1	3.12297	1.11257e-07	3.76086e-06	up	11426	ABP620|Acf7|Aclp7|MACF|R74989|mKIAA0465
chr6	145963741	145964120	diffreps_peak_00117912	6.33116	379	NM_010656	Sspn	2.21503	4.66484e-07	1.16837e-05	up	16651	Krag
chr11	112782209	112783015	diffreps_peak_00025442	7.45625	806	NM_011448	Sox9	2.06564	3.49744e-08	1.6084e-06	up	20682	2010306G03Rik|AV220920|mKIAA4243
chr14	70170061	70170500	diffreps_peak_00041930	7.96649	439	uc007unj.1	Pdlim2	4.743	1.08022e-08	7.21977e-07	up	213019	4732462F18Rik|Slim
chr1	133382801	133383120	diffreps_peak_00005790	10.8908	319	NM_011439	Sox13	17.7625	1.28584e-11	6.05818e-09	up	20668	AA407916|AW259412|AW540933|Sox-13
chr13	37930241	37930940	diffreps_peak_00034573	8.79477	699	NM_026830	Rreb1	3.49084	1.60411e-09	1.99901e-07	up	68750	1110037N09Rik|AA414966|B930013M22Rik
chr2	83724401	83724800	diffreps_peak_00075742	6.79067	399	NM_008402	Itgav	2.39587	1.6193e-07	5.02278e-06	up	16410	1110004F14Rik|2610028E01Rik|CD51|D430040G12Rik
chr3	58692021	58692400	diffreps_peak_00084406	7.21156	379	ENSMUST00000070368	Siah2	7.70098	6.14381e-08	2.41077e-06	up	20439	AA415433|Sinh2
chr11	102800641	102800980	diffreps_peak_00024575	8.30569	339	NM_008122	Gjc1	2.59669	4.94666e-09	4.2576e-07	up	14615	C130009G16Rik|Cnx45|Cx45|Gja-7|Gja7
chr6	4528801	4529380	diffreps_peak_00110428	5.31733	579	uc009avn.1	Col1a2	3.83168	4.81577e-06	8.15088e-05	up	12843	AA960264|AI325291|Col1a-2|Cola-2|Cola2|oim
chrX	20617681	20618000	diffreps_peak_00145930	8.9951	319	NM_001167775	Rbm10	2.51139	1.01134e-09	1.40999e-07	up	236732	E430039K10Rik
chr17	25568689	25569580	diffreps_peak_00057173	10.2573	891	uc008baz.1	Sox8	2.13826	5.52935e-11	1.59213e-08	up	20681	-
chr11	100958361	100959325	diffreps_peak_00024271	6.73418	964	NM_008986	Ptrf	4.18953	1.84425e-07	5.59029e-06	up	19285	2310075E07Rik|AW546441|Cav-p60|Cavin
chr11	59487221	59487620	diffreps_peak_00019837	9.92254	399	NM_172941	Zkscan17	2.91755	1.19525e-10	2.8129e-08	up	268417	Nizp1|Zfp496|Znf496
chr4	130253494	130254060	diffreps_peak_00096264	7.54624	566	ENSMUST00000105996	Serinc2	5.84766	2.84289e-08	1.38169e-06	up	230779	2310004K20Rik|AW121759|FKSG84|TDE2|Tde2l
chr15	99819493	99819840	diffreps_peak_00049577	6.50548	347	NM_023063	Lima1	2.53539	3.1226e-07	8.46367e-06	up	65970	Eplin
chrX	73495621	73495936	diffreps_peak_00146857	8.41447	315	NM_007542	Bgn	7.11727	3.85062e-09	3.59836e-07	up	12111	BG|DSPG1|PG-S1|PGI|SLRR1A
chr5	30115941	30116560	diffreps_peak_00101169	7.0152	619	uc029vgs.1	Gareml	3.73931	9.65613e-08	3.3827e-06	up	242915	Fam59b|Garem2|Gm444
chr3	75894834	75895137	diffreps_peak_00084859	6.31746	303	NM_175193	Golim4	2.73088	4.81441e-07	1.19415e-05	up	73124	3110027H23Rik|GIMPC|GPP130|Golph4|P138
chr9	57595641	57595980	diffreps_peak_00140973	7.23603	339	NM_027895	Ulk3	4.56093	5.80728e-08	2.31265e-06	up	71742	1200015E14Rik
chr13	112508921	112509320	diffreps_peak_00038020	7.59932	399	ENSMUST00000183663	Il6st	5.84969	2.51583e-08	1.26648e-06	up	16195	5133400A03Rik|AA389424|BB405851|CD130|D13Ertd699e|gp130
chr6	34745618	34746639	diffreps_peak_00111782	5.17074	1021	ENSMUST00000115027	Cald1	3.90567	6.74925e-06	0.000108386	up	109624	4833423D12Rik|AI195384|AV071549|AW536160|C920027I18Rik
chrX	106086101	106086440	diffreps_peak_00147949	9.87054	339	NM_009726	Atp7a	13.8077	1.34727e-10	3.05344e-08	up	11977	MNK
chr4	149897921	149898300	diffreps_peak_00098656	5.98539	379	NM_029035	Spsb1	5.41905	1.03422e-06	2.23882e-05	up	74646	1110014L01Rik|4930422J18Rik|AI596360|AI854583|SSB-1|SSB1
chr4	139963821	139964240	diffreps_peak_00097602	6.42906	419	NM_173427	Klhdc7a	3.19756	3.72343e-07	9.76596e-06	up	242721	B230308G19Rik
chr12	80171728	80172100	diffreps_peak_00030288	6.23945	372	uc007oao.2	Actn1	3.06971	5.76169e-07	1.38169e-05	up	109711	3110023F10Rik|Actn1a
chr4	43531512	43531960	diffreps_peak_00091101	7.66322	448	NM_011602	Tln1	3.99219	2.1716e-08	1.14504e-06	up	21894	Tln
chr12	80259986	80260371	diffreps_peak_00030312	6.40828	385	NM_134156	Actn1	2.70078	3.9059e-07	1.01215e-05	up	109711	3110023F10Rik|Actn1a
chr2	164856886	164857200	diffreps_peak_00080910	5.73432	314	ENSMUST00000109316	Pltp	2.51696	1.84365e-06	3.63115e-05	up	18830	Bpife|OD107
chr5	25383421	25383860	diffreps_peak_00100844	7.91073	439	uc008wsx.1	Kmt2c	8.08511	1.22819e-08	7.85087e-07	up	231051	E330008K23Rik|HALR|Mll3|mKIAA1506
chr7	105746241	105746700	diffreps_peak_00125701	6.70279	459	NM_009906	Tpp1	2.68656	1.9825e-07	5.92338e-06	up	12751	Cln2|LPIC|TPP-1|TPP-I
chr4	132074901	132075420	diffreps_peak_00096408	5.15616	519	ENSMUST00000094662	Gm10300	3.18246	6.97968e-06	0.000111607	up	100379259	ENSMUSG00000070717
chr5	125026801	125027217	diffreps_peak_00107453	7.03542	416	NM_011424	Ncor2	2.34244	9.21672e-08	3.27165e-06	up	20602	N-CoR|SMRT|SMRTe
chr4	133194395	133194720	diffreps_peak_00096621	5.56145	325	NM_153423	Wasf2	2.1891	2.74506e-06	5.07164e-05	up	242687	AW742646|D4Ertd13e|WAVE2
chr3	87174395	87174747	diffreps_peak_00085308	8.75502	352	NM_130867	Kirrel	3.90741	1.75783e-09	2.14345e-07	up	170643	6720469N11Rik|Kirrel1|Neph1
chr11	115243381	115243740	diffreps_peak_00025726	7.00665	359	NM_001033393	Tmem104	5.75301	9.84811e-08	3.43191e-06	up	320534	C630005D06Rik|mFLJ00021
chr15	58103221	58103600	diffreps_peak_00045814	7.97876	379	uc007vtg.1	Atad2	5.6624	1.05011e-08	7.08859e-07	up	70472	2610509G12Rik
chr17	85623726	85624300	diffreps_peak_00061787	10.5799	574	NM_011381	Six3	2.46702	2.63072e-11	9.40387e-09	up	20473	E130112M24Rik|Six3a|Six3alpha|Six3b|Six3beta
chr6	49047801	49048101	diffreps_peak_00112684	8.06532	300	NM_053110	Gpnmb	22.9524	8.60359e-09	6.23405e-07	up	93695	DC-HIL|Dchil|ipd
chr6	72234393	72234960	diffreps_peak_00113502	12.3581	567	NM_153778	Atoh8	6.62132	4.38445e-13	1.01144e-09	up	71093	4933425C05Rik|Hath6|Math6|bHLHa21|okadin
chr4	123411301	123411911	diffreps_peak_00095105	8.44203	610	NM_001167918	D830031N03Rik	2.69423	3.61382e-09	3.42984e-07	up	442834	Kiaa0754|mKIAA0754
chr6	125306570	125307000	diffreps_peak_00116977	7.19158	430	NM_010736	Ltbr	2.23074	6.43312e-08	2.49188e-06	up	17000	AI256028|CD18|LTbetaR|Ltar|TNF-R-III|TNFCR|TNFR-RP|TNFR2-RP|TNFRrp|Tnfbr|Tnfrsf3
chr17	84185141	84187156	diffreps_peak_00061684	10.1082	2015	NM_001001806	Zfp36l2	2.78264	7.79391e-11	2.05073e-08	up	12193	Brf2|ERF2|Tis11d
chr5	115546812	115547260	diffreps_peak_00106072	7.1581	448	uc008zec.1	Pxn	2.06174	6.94866e-08	2.65312e-06	up	19303	AW108311|AW123232|Pax
chr18	80972861	80973720	diffreps_peak_00066696	6.6213	859	NM_178280	Sall3	2.50438	2.39169e-07	6.84593e-06	up	20689	B130022O04Rik|Msal|Msal-1|Sal|Salt|Spalt
chr6	29736441	29736840	diffreps_peak_00111325	7.25195	399	uc009bee.1	AK053708	4.48622	5.59821e-08	2.25282e-06	up	NA	NA
chr2	26089542	26090120	diffreps_peak_00072385	7.65725	578	NM_026495	Nacc2	2.23123	2.20163e-08	1.15308e-06	up	67991	0610020I02Rik|AI448087|Btbd14a|C030048H19Rik
chr4	126565970	126566280	diffreps_peak_00095526	6.47227	310	NM_175554	Clspn	2.82376	3.37081e-07	9.00541e-06	up	269582	B130025E01|C85083|E130314M08Rik
chr17	25567481	25567820	diffreps_peak_00057171	7.80388	339	NM_011447	Sox8	2.48356	1.57079e-08	9.19803e-07	up	20681	-
chr11	102908112	102908638	diffreps_peak_00024600	7.36306	526	NM_197959	Kif18b	2.78863	4.33453e-08	1.87473e-06	up	70218	3000004C01Rik
chr16	3946381	3946840	diffreps_peak_00050104	5.58673	459	ENSMUST00000177551	Nlrc3	2.73905	2.58983e-06	4.82593e-05	up	268857	CLR16.2|D230007K08Rik|mFLJ00348
chr3	138065461	138065800	diffreps_peak_00088420	5.41744	339	ENSMUST00000163080	1110002E22Rik	14.3509	3.82437e-06	6.70429e-05	up	100039528	AI415341|Gm2292
chr11	90603341	90603900	diffreps_peak_00023144	9.36207	559	ENSMUST00000107872	Stxbp4	3.42385	4.34442e-10	7.46955e-08	up	20913	6030470M02Rik|Synip
chr8	27123041	27123360	diffreps_peak_00130673	8.58398	319	NM_054044	Adgra3	137.5	2.60629e-09	2.81781e-07	up	70693	3830613O22Rik|AU044632|Gpr125|Tem5-like
chr8	57513965	57514320	diffreps_peak_00131777	6.55676	355	NM_008252	Hmgb2	2.30662	2.77487e-07	7.67264e-06	up	97165	C80539|HMG-2|Hmg2
chr5	30060261	30060600	diffreps_peak_00101158	7.24681	339	NM_021288	Tyms	4.9011	5.66493e-08	2.27229e-06	up	22171	Ts
chr2	113847960	113848661	diffreps_peak_00077075	9.03852	701	NM_181416	Arhgap11a	2.4843	9.15123e-10	1.31085e-07	up	228482	6530401L14Rik|mKIAA0013
chr4	130127781	130128135	diffreps_peak_00096261	8.00663	354	ENSMUST00000118199	Pef1	4.42346	9.84851e-09	6.81334e-07	up	67898	2600002E23Rik|Peflin
chr4	57689741	57690100	diffreps_peak_00091953	5.49599	359	uc008syf.1	Palm2	14.5088	3.19162e-06	5.74897e-05	up	242481	53-H12|B130066I24|R75368|pEN70
chr14	56647821	56648620	diffreps_peak_00041136	10.0827	799	NM_001145978	Parp4	6.95987	8.26684e-11	2.11391e-08	up	328417	Adprtl1|C030027K23Rik|E230037B21Rik|Gm743|PARPL|PH5P|VAULT3|VPARP|p193
chr4	65124173	65124480	diffreps_peak_00092277	9.07203	307	NM_021362	Pappa	126.5	8.47172e-10	1.2413e-07	up	18491	8430414N03Rik|IGFBP-4ase|PAG1|PAPP-A
chr1	119546921	119547240	diffreps_peak_00004876	7.66544	319	NM_145506	Epb4.1l5	6.44545	2.16052e-08	1.14149e-06	up	NA	NA
chr18	58837441	58837780	diffreps_peak_00065024	7.11183	339	NM_175506	Adamts19	85.6	7.72977e-08	2.88256e-06	up	240322	4831407I23Rik|AU015154|D230034E10Rik
chr15	102431101	102431440	diffreps_peak_00049932	7.43724	339	NM_013672	Sp1	4.9584	3.65395e-08	1.65647e-06	up	20683	1110003E12Rik|AA450830|AI845540|Sp1-1
chr18	5766861	5767220	diffreps_peak_00062401	11.814	359	NM_011546	Zeb1	4.12486	1.5347e-12	1.79101e-09	up	21417	3110032K11Rik|AREB6|BZP|MEB1|Nil2|TCF-8|Tcf18|Tcf8|Tw|ZEB|Zfhep|Zfhx1a|Zfx1a|Zfx1ha|[delta]EF1
chr16	84774122	84774480	diffreps_peak_00054640	6.69265	358	NM_023844	Jam2	2.81573	2.0293e-07	6.03865e-06	up	67374	1110002N23Rik|2410030G21Rik|2410167M24Rik|JAM-2|JAM-B|Jcam2|VE-JAM
chr18	75367364	75367740	diffreps_peak_00066177	5.27635	376	NM_001042660	Smad7	2.50736	5.29237e-06	8.83659e-05	up	17131	Madh7
chr7	127343821	127344140	diffreps_peak_00127399	6.14924	319	NM_146202	Zfp768	2.77506	7.09192e-07	1.64027e-05	up	233890	BC026432|Znf768
chrX	93623541	93623920	diffreps_peak_00147323	7.81876	379	uc009tst.1	Pola1	6.52866	1.51787e-08	8.98103e-07	up	18968	AW321876|Pola
chr5	30918221	30918660	diffreps_peak_00101295	13.0902	439	NM_133918	Emilin1	16.3354	8.12404e-14	8.98318e-10	up	100952	5830419M17Rik|AW229038|BB105748|EMILIN-1|gp115
chr8	25573744	25574220	diffreps_peak_00130564	10.0934	476	NM_010206	Fgfr1	2.55506	8.06573e-11	2.08628e-08	up	14182	AW208770|Eask|FLG|Fgfr-1|Flt-2|Hspy|MFR|bFGF-R-1|c-fgr
chr14	70184827	70185136	diffreps_peak_00041936	8.65937	309	NM_011366	Sorbs3	3.31296	2.19093e-09	2.51105e-07	up	20410	SCAM-1|SH3P3|Sh3d4|vinexin-g
chr2	131246363	131246760	diffreps_peak_00078413	11.1193	397	NM_144888	Mavs	3.65967	7.59801e-12	4.51313e-09	up	228607	D430028G21Rik|IPS-1|Visa|cardif
chr10	42562321	42562660	diffreps_peak_00011045	6.11657	339	NM_152229	Nr2e1	2.01655	7.64588e-07	1.74394e-05	up	21907	Mtl1|Mtll|TLL|Tlx|XTLL|fierce|frc|tailless
chr6	128372901	128373960	diffreps_peak_00117161	9.16628	1059	NM_008021	Foxm1	2.91622	6.81898e-10	1.06021e-07	up	14235	AA408308|AW554517|BB238854|Fkh16|Foxm1b|HFH-11B|MPHOSPH2|Mpm2|WIN
chr1	133383521	133383900	diffreps_peak_00005791	6.65841	379	NM_011439	Sox13	4.34988	2.19577e-07	6.41462e-06	up	20668	AA407916|AW259412|AW540933|Sox-13
chr15	25807735	25808188	diffreps_peak_00044497	7.4432	453	NM_019472	Myo10	2.39945	3.60413e-08	1.64111e-06	up	17909	AW048724|D15Ertd600e|mKIAA0799
chr6	120038361	120038672	diffreps_peak_00116491	6.45634	311	ENSMUST00000060043	Wnk1	2.52125	3.49669e-07	9.27551e-06	up	232341	6430573H23Rik|EG406236|Hsn2|Prkwnk1|mKIAA0344
chr16	38608902	38609300	diffreps_peak_00053055	8.70557	398	NM_020260	Arhgap31	2.89515	1.96983e-09	2.32341e-07	up	12549	5830477L08Rik|AU041750|Cdgap|D330026I07Rik
chr6	42351474	42351969	diffreps_peak_00112405	8.15579	495	NM_011777	Zyx	2.39258	6.98569e-09	5.4158e-07	up	22793	9530098H06Rik|R75157
chr4	132377179	132377554	diffreps_peak_00096454	5.71066	375	NM_175306	Phactr4	3.28096	1.94691e-06	3.80296e-05	up	100169	3110001B12Rik|AI527228|AW495572|C330013F19Rik|N28169|mKIAA4120
chr2	113832221	113832840	diffreps_peak_00077073	5.37656	619	NM_181416	Arhgap11a	2.04023	4.20182e-06	7.23744e-05	up	228482	6530401L14Rik|mKIAA0013
chr17	25569861	25570686	diffreps_peak_00057174	10.4635	825	uc008baz.1	Sox8	2.36153	3.43938e-11	1.12784e-08	up	20681	-
chrX	73491821	73492180	diffreps_peak_00146855	9.83808	359	uc009tlw.2	Bgn	9.71341	1.45184e-10	3.21466e-08	up	12111	BG|DSPG1|PG-S1|PGI|SLRR1A
chr9	119971681	119972060	diffreps_peak_00145089	5.11448	379	NM_153287	Csrnp1	60	7.68279e-06	0.000121238	up	215418	4931429D10Rik|Axud1|CSRNP-1|URAX1|taip-3
chr18	35654281	35654660	diffreps_peak_00063740	8.64051	379	NM_001270646	Prob1	24.3333	2.28817e-09	2.5787e-07	up	381148	Gm1614
chr19	5745521	5745880	diffreps_peak_00067461	12.5354	359	uc008gfg.1	Ltbp3	4.62631	2.9147e-13	8.98318e-10	up	16998	Ltbp2|mFLJ00070
chr10	4266328	4266668	diffreps_peak_00009324	5.4593	340	NM_031185	Akap12	2.02447	3.47297e-06	6.17725e-05	up	83397	AI317366|SSeCKS|Srcs5|Tsga12
chr7	110629381	110629819	diffreps_peak_00125991	7.30772	438	NM_009627	Adm	8.0489	4.92354e-08	2.05944e-06	up	11535	AM
chr7	48870690	48871216	diffreps_peak_00122157	7.00456	526	NM_001013368	E2f8	4.23376	9.89554e-08	3.4436e-06	up	108961	4432406C08Rik|AA410048
chr10	93746361	93746800	diffreps_peak_00014643	7.6232	439	ENSMUST00000020204	Ntn4	2.2766	2.38124e-08	1.21851e-06	up	57764	-
chr9	60863341	60863660	diffreps_peak_00141313	5.34255	319	uc009pzl.1	Uaca	8.36458	4.54413e-06	7.75028e-05	up	72565	2700059D02Rik|nucling
chr6	50652493	50652820	diffreps_peak_00112747	7.48294	327	NM_021892	Npvf	15.55	3.28895e-08	1.54146e-06	up	60531	Rfrp
chrX	60892781	60893430	diffreps_peak_00146639	7.48307	649	NM_009237	Sox3	2.65722	3.288e-08	1.54138e-06	up	20675	Sox-3
chr1	44551561	44551872	diffreps_peak_00001815	5.46812	311	ENSMUST00000074525	Gulp1	3.39568	3.40313e-06	6.07098e-05	up	70676	3110030A04Rik|5730529O06Rik|CED-6|Ced6|GULP|Gulp-2
chr7	24559735	24560120	diffreps_peak_00119625	5.51219	385	uc009fpy.1	Xrcc1	3.47208	3.07476e-06	5.58973e-05	up	22594	Xrcc-1
chr17	45520201	45520620	diffreps_peak_00059227	8.31485	419	uc008cqs.1	Aars2	3.44919	4.84337e-09	4.18961e-07	up	224805	Aarsl|AlaRS|Gm89
chr7	125576561	125576900	diffreps_peak_00127061	5.70793	339	NM_001008700	Il4ra	68.3	1.95914e-06	3.82331e-05	up	16190	CD124|Il4r
chr3	107748821	107749169	diffreps_peak_00087323	9.63994	348	NM_007778	Csf1	2.68535	2.29119e-10	4.51842e-08	up	12977	C87615|Csfm|MCSF|op
chr7	28362825	28363280	diffreps_peak_00120356	8.01364	455	uc009fym.1	Plekhg2	3.55819	9.69077e-09	6.75546e-07	up	101497	AI194308|Clg|Cslg
chr7	90302354	90302720	diffreps_peak_00124462	9.18851	366	NM_031394	Sytl2	13.9294	6.47866e-10	1.01847e-07	up	83671	AI266830|Slp2|mKIAA1597
chr7	128539972	128540311	diffreps_peak_00127676	9.43518	339	NM_013863	Bag3	3.5566	3.67132e-10	6.57366e-08	up	29810	AA407278|Bis|mg638
chr4	149150241	149150763	diffreps_peak_00098521	8.02147	522	NM_001081274	Pgd	2.03435	9.51766e-09	6.67926e-07	up	110208	0610042A05Rik|AU019875|C78335
chr5	92940501	92941320	diffreps_peak_00104215	9.6964	819	NM_015756	Shroom3	4.74744	2.01187e-10	4.14906e-08	up	27428	AL022960|D5Ertd287e|Shrm|Shrm3
chr2	27886424	27886924	diffreps_peak_00072615	6.85453	500	NM_015734	Col5a1	4.85754	1.39789e-07	4.48463e-06	up	12831	AI413331
chr4	82330041	82330426	diffreps_peak_00092759	7.81246	385	uc008tkg.3	Nfib	2.17953	1.54006e-08	9.06636e-07	up	18028	6720429L07Rik|CTF|E030026I10Rik|NF-I/B|NF1-B|NFI-B
chr8	61549581	61550245	diffreps_peak_00131924	7.23429	664	NM_001293772	Palld	4.97721	5.83053e-08	2.31949e-06	up	72333	2410003B16Rik|6030492A02
chr9	63953301	63953640	diffreps_peak_00141537	7.69129	339	NM_008542	Smad6	13.1988	2.03567e-08	1.09596e-06	up	17130	Madh6|b2b390Clo
chr6	53817761	53818080	diffreps_peak_00112883	6.50453	319	NM_025817	Tril	3.91133	3.12945e-07	8.47761e-06	up	66873	1200009O22Rik|AI316813|mKIAA0644
chr1	180989553	180989940	diffreps_peak_00008511	9.04712	387	ENSMUST00000036928	Ephx1	2.75054	8.97176e-10	1.29449e-07	up	13849	EH|Eph-1|Eph1|Epxh1|mEH
chr1	133609741	133610140	diffreps_peak_00005795	6.07506	399	ENSMUST00000164574	Snrpe	2.01615	8.41275e-07	1.88782e-05	up	20643	AL022645|C76690|SME
chr1	139457221	139457540	diffreps_peak_00006170	7.54448	319	NM_009791	Aspm	6.66915	2.85444e-08	1.38539e-06	up	12316	Calmbp1|D330028K02Rik|MCPH5|Sha1
chr10	25501823	25502387	diffreps_peak_00010286	6.29473	564	NM_013511	Epb4.1l2	2.10765	5.07309e-07	1.24705e-05	up	NA	NA
chr11	116807661	116807968	diffreps_peak_00026068	7.71932	307	uc007mmg.1	Mxra7	3.06537	1.90844e-08	1.0491e-06	up	67622	1810057P16Rik|E130302J09Rik
chr9	44094821	44095280	diffreps_peak_00139653	6.03927	459	NM_016808	Usp2	2.31307	9.13555e-07	2.02211e-05	up	53376	B930035K21Rik|Ubp41
chr2	181797341	181797720	diffreps_peak_00082441	7.58138	379	NM_008665	Myt1	2.12911	2.62195e-08	1.30174e-06	up	17932	Nzf2|Nzf2a|Nzf2b|Nztf2
chr3	75956461	75956949	diffreps_peak_00084861	6.29059	488	NM_175193	Golim4	2.16255	5.12162e-07	1.25707e-05	up	73124	3110027H23Rik|GIMPC|GPP130|Golph4|P138
chr8	27151681	27152020	diffreps_peak_00130677	8.50163	339	NM_001080813	Rab11fip1	22.5789	3.15042e-09	3.11419e-07	up	75767	2010200K21Rik|4833414G05Rik|Rcp
chr17	7771941	7772400	diffreps_peak_00056085	8.23326	459	NM_001081416	Fndc1	6.10744	5.84441e-09	4.80317e-07	up	68655	1110027O12Rik|1110051A18Rik|mKIAA1866
chr13	37946856	37947663	diffreps_peak_00034578	7.25799	807	NM_001177869	Rreb1	2.05414	5.5209e-08	2.23167e-06	up	68750	1110037N09Rik|AA414966|B930013M22Rik
chr2	92363241	92363620	diffreps_peak_00076211	6.50031	379	NM_138755	Phf21a	8.42081	3.16003e-07	8.5412e-06	up	192285	80kDa|Bhc|Bhc80|D030065N23Rik|PFTF1
chr4	108623401	108623840	diffreps_peak_00094093	6.2038	439	ENSMUST00000166069	Gm20731	2.39345	6.25467e-07	1.47685e-05	up	NA	NA
chr16	38712661	38713000	diffreps_peak_00053066	9.47697	339	NM_020260	Arhgap31	2.44478	3.33451e-10	6.09152e-08	up	12549	5830477L08Rik|AU041750|Cdgap|D330026I07Rik
chr16	44451601	44451940	diffreps_peak_00053546	7.38091	339	NM_001033247	Cfap44	3.897	4.15997e-08	1.82304e-06	up	212517	6330444M21Rik|D16Ertd642e|Gm1750|Wdr52
chr8	70650381	70650785	diffreps_peak_00132554	6.9595	404	NM_023217	Pgpep1	2.30675	1.09774e-07	3.72096e-06	up	66522	2810003H13Rik|Gm19458|PAP-I|PGP|PGP-I|PGPI|Pcp
chr15	100527181	100527560	diffreps_peak_00049668	7.81813	379	uc007xrn.1	Tfcp2	17.3091	1.52008e-08	8.9887e-07	up	21422	CP-2|CP2|D230015P20Rik|LBP-1c|LBP-1d|LBP1|LSF|Tcfcp2|UBP-1
chr6	31519861	31520240	diffreps_peak_00111501	12.1841	379	NM_013723	Podxl	4.61654	6.54536e-13	1.15942e-09	up	27205	AW121214|Ly102|PC|PCLP-1|Pclp1
chr10	108332687	108333311	diffreps_peak_00015061	7.60173	624	NM_054056	Pawr	3.62679	2.50189e-08	1.26106e-06	up	114774	2310001G03Rik|PAR4|Par-4
chr2	155991201	155991900	diffreps_peak_00079910	6.21552	699	NM_008383	Cep250	2.20356	6.08804e-07	1.44389e-05	up	16328	AW490617|B230210E21Rik|Cep2|Inmp
chr5	30913401	30913780	diffreps_peak_00101294	7.0254	379	ENSMUST00000031055	Emilin1	2.61597	9.43191e-08	3.3275e-06	up	100952	5830419M17Rik|AW229038|BB105748|EMILIN-1|gp115
chr5	103834081	103834459	diffreps_peak_00104753	5.49764	378	NM_133919	Aff1	2.96262	3.17952e-06	5.72977e-05	up	17355	9630032B01Rik|AW319193|Af4|Mllt2h|Rob
chr16	31663908	31664321	diffreps_peak_00052281	8.86328	413	ENSMUST00000115201	Dlg1	2.41413	1.36998e-09	1.78342e-07	up	13383	B130052P05Rik|Dlgh1|E-dlg/SAP97|SAP-97|SAP97|mKIAA4187
chr7	101823892	101824559	diffreps_peak_00125482	10.7546	667	NM_010567	Inppl1	3.45849	1.75956e-11	7.28775e-09	up	16332	51C|SHIP2
chr14	51989521	51989860	diffreps_peak_00040732	7.64285	339	NM_198249	Arhgef40	2.27844	2.27587e-08	1.18197e-06	up	268739	E130112L23Rik|Gm669|Solo
chr6	72626461	72626860	diffreps_peak_00113548	7.42853	399	NM_009332	Tcf7l1	2.9339	3.72797e-08	1.67824e-06	up	21415	Tcf-3|Tcf3|bHLHb21
chr7	142575661	142578146	diffreps_peak_00128569	9.632	2485	uc012fxn.1	H19	3.62316	2.33346e-10	4.56548e-08	up	14955	AI747191
chr14	28504781	28505540	diffreps_peak_00039645	11.1546	759	ENSMUST00000063465	Wnt5a	3.78681	7.00436e-12	4.32685e-09	up	22418	8030457G12Rik|Wnt-5a
chr18	13971363	13971720	diffreps_peak_00062694	7.62669	357	uc008edc.1	Zfp521	4.08463	2.36216e-08	1.21321e-06	up	225207	B930086A16Rik|Evi3|Znf521
chr2	118814002	118814309	diffreps_peak_00077249	7.0284	307	NM_026412	Knstrn	5.39574	9.36692e-08	3.31193e-06	up	51944	1700025D04Rik|C15orf23|D2Ertd750e|SKAP|Traf4af1
chr12	24708751	24709085	diffreps_peak_00028058	7.08258	334	ENSMUST00000153058	Rrm2	4.28452	8.26829e-08	3.0203e-06	up	20135	AA407299|R2
chr2	163322743	163323160	diffreps_peak_00080713	8.03513	417	ENSMUST00000099110	Tox2	2.19172	9.22301e-09	6.52557e-07	up	269389	AI851523|AV026525|BI987407|Gcx1|RxHMG1
chr8	15027861	15028260	diffreps_peak_00129960	6.83525	399	NM_029116	Kbtbd11	5.19681	1.46133e-07	4.63717e-06	up	74901	2900016B01Rik|4930465M17Rik|mKIAA0711
chr19	46655581	46656000	diffreps_peak_00070179	6.06218	419	NM_146099	Wbp1l	3.21836	8.66612e-07	1.93287e-05	up	226178	D19Wsu162e|Opal1
chr7	123286497	123286840	diffreps_peak_00127021	7.32107	343	NM_144529	Arhgap17	3.66716	4.77455e-08	2.0122e-06	up	70497	5730403H17Rik|Nadrin|Nadrin2|Rich1|Wbp15
chr7	101321501	101322033	diffreps_peak_00125402	6.42269	532	ENSMUST00000172630	Stard10	2.04549	3.7784e-07	9.86582e-06	up	56018	AV048538|CGI-52|NY-C0-28|PC-TP2|PCTP2|Pctpl|Sdccag28|SdccagG28|TISP-81
chrX	170010673	170011063	diffreps_peak_00149358	5.46403	390	ENSMUST00000180251	Gm21887	2.10381	3.43534e-06	6.12073e-05	up	NA	NA
chr4	82504881	82505779	diffreps_peak_00092791	9.35517	898	NM_008687	Nfib	2.20189	4.41394e-10	7.52448e-08	up	18028	6720429L07Rik|CTF|E030026I10Rik|NF-I/B|NF1-B|NFI-B
chr19	42148381	42148760	diffreps_peak_00069664	5.09203	379	NM_183195	Marveld1	2.55789	8.09032e-06	0.000126732	up	277010	AI504298|Mrvldc1
chr19	38968301	38968620	diffreps_peak_00069423	7.51857	319	ENSMUST00000025965	Hells	4.11429	3.02991e-08	1.45196e-06	up	15201	AI323785|E130115I21Rik|LSH|Lysh|PASG|YFK8
chr7	99352881	99353239	diffreps_peak_00125105	9.80113	358	NM_009825	Serpinh1	2.67026	1.58078e-10	3.44253e-08	up	12406	BERF-1|Cbp1|Cbp2|Hsp47|J6|Serpinh2|gp46
chr9	37348033	37348392	diffreps_peak_00139252	12.105	359	NM_001081429	Ccdc15	3.4942	7.85258e-13	1.32602e-09	up	245902	A630039F14Rik|D030074L19
chr4	154341261	154342000	diffreps_peak_00099206	7.49294	739	NM_027504	Prdm16	3.87007	3.21409e-08	1.51605e-06	up	70673	5730557K01Rik|csp1|mel1
chr10	81348885	81349440	diffreps_peak_00013651	7.50659	555	uc007ghj.2	Hmg20b	6.39526	3.11469e-08	1.48042e-06	up	15353	AW610687|BRAF35|Hmgx2|Hmgxb2|Smarce1r
chr16	57632341	57632641	diffreps_peak_00053926	10.1766	300	NM_007739	Col8a1	13.2459	6.65892e-11	1.81716e-08	up	12837	Col8a-1
chr6	83151861	83152300	diffreps_peak_00113904	7.01123	439	ENSMUST00000153148	Wdr54	2.82456	9.74473e-08	3.40366e-06	up	75659	1700030E05Rik
chr6	43272841	43273460	diffreps_peak_00112425	11.5871	619	NM_133674	Arhgef5	4.3216	2.58768e-12	2.30194e-09	up	54324	2210412D05Rik|AA717842|AW495314|Tim1
chr7	65370809	65371244	diffreps_peak_00123152	8.52135	435	NM_009386	Tjp1	2.46264	3.01058e-09	3.02707e-07	up	21872	ZO1
chr6	145211133	145211476	diffreps_peak_00117867	6.75524	343	NM_001163628	Lyrm5	2.46228	1.75696e-07	5.36919e-06	up	67636	4930469P12Rik|AL022899|Ghiso
chr8	25101659	25101985	diffreps_peak_00130522	7.30756	326	ENSMUST00000128715	Plekha2	5.83395	4.92536e-08	2.05976e-06	up	83436	6430512N22Rik|AI851530|AU041791|TAPP2|W91773
chr11	59176221	59176620	diffreps_peak_00019789	5.67747	399	NM_080454	Gjc2	21.9459	2.10149e-06	4.06116e-05	up	118454	B230382L12Rik|Cx47|Gja12
chr1	189850023	189850380	diffreps_peak_00008918	12.0936	357	NM_008976	Ptpn14	5.78018	8.06095e-13	1.32602e-09	up	19250	C130080N23Rik|OTTMUSG00000022087|PTP36
chr2	157006081	157006520	diffreps_peak_00080168	5.30198	439	ENSMUST00000154213	Dsn1	2.65719	4.98912e-06	8.39099e-05	up	66934	1700022L09Rik|AW552447
chr7	16221683	16221993	diffreps_peak_00118939	5.73692	310	NM_001285931	Dhx34	2.01752	1.83265e-06	3.61558e-05	up	71723	1200013B07Rik|1810012L18Rik|Ddx34|mKIAA0134
chr9	21767121	21767820	diffreps_peak_00138192	8.88187	699	NM_145611	Kank2	3.1644	1.3126e-09	1.72571e-07	up	235041	AI504612|Ankrd25|BC010245
chr3	53652061	53652440	diffreps_peak_00084137	5.20913	379	NM_172862	Frem2	2.13813	6.17831e-06	0.000100379	up	242022	6030440P17Rik|8430406N05Rik|Gm409|b2b1562Clo|my|ne|nv1
chr10	13130301	13131695	diffreps_peak_00009809	8.10973	1394	NM_009538	Plagl1	3.6512	7.76724e-09	5.81566e-07	up	22634	Lot1|Zac1
chr1	82290081	82290440	diffreps_peak_00003455	11.3515	359	NM_010570	Irs1	3.34843	4.45093e-12	3.25841e-09	up	16367	G972R|IRS-1
chr4	126311761	126312200	diffreps_peak_00095498	5.19609	439	NM_199473	Col8a2	3.70659	6.36663e-06	0.000103017	up	329941	AI429819
chr17	46258521	46259380	diffreps_peak_00059351	6.31117	859	NM_028751	Tjap1	2.15846	4.88461e-07	1.20801e-05	up	74094	0610041D19Rik|AI415281|AW121008|Pilt|Tjp4
chr19	59463921	59464580	diffreps_peak_00070925	9.51553	659	NM_010132	Emx2	2.33538	3.05122e-10	5.65737e-08	up	13797	Pdo
chr10	75937961	75938356	diffreps_peak_00012667	7.19524	395	NM_001277132	Gm867	9.58955	6.3791e-08	2.47625e-06	up	333670	Gm736
chr14	54926461	54926788	diffreps_peak_00040930	6.98646	327	NM_010112	Efs	7.51099	1.03166e-07	3.54167e-06	up	13644	-
chr3	108012249	108012778	diffreps_peak_00087340	8.41881	529	NM_010358	Gstm1	2.46725	3.8123e-09	3.57434e-07	up	14862	Gstb-1|Gstb1
chr16	43610341	43610800	diffreps_peak_00053470	10.0391	459	NM_019778	Zbtb20	3.50273	9.13991e-11	2.28086e-08	up	56490	1300017A20Rik|7330412A13Rik|A930017C21Rik|D16Wsu73e|DPZF|HOF|ODA-8S|Oda8|Zfp288
chr2	156138781	156139280	diffreps_peak_00079957	5.60702	499	uc008nmk.2	Nfs1	2.92815	2.47162e-06	4.63643e-05	up	18041	AA987187|m-Nfs1|m-Nfsl
chr4	126149235	126149540	diffreps_peak_00095437	5.48369	305	NM_172145	Eva1b	3.79849	3.28333e-06	5.89224e-05	up	230752	2610027C15Rik|Fam176b
chr5	142460781	142461160	diffreps_peak_00109506	8.22506	379	NM_199068	Foxk1	4.31827	5.95574e-09	4.85245e-07	up	17425	A630048H08Rik|AI463295|ENSMUSG00000075577|Gm10868|Mnf
chr4	63333401	63333860	diffreps_peak_00092207	9.28758	459	NM_025685	Col27a1	4.11518	5.15726e-10	8.54769e-08	up	373864	5730512J02Rik|AI449266
chr5	121593361	121593800	diffreps_peak_00106739	7.75868	439	NM_009656	Aldh2	2.00561	1.74309e-08	9.8635e-07	up	11669	AHD-M1|ALDH-E2|ALDHI|Ahd-5|Ahd5
chr2	26459441	26460200	diffreps_peak_00072441	9.86598	759	NM_008714	Notch1	3.12541	1.36151e-10	3.07295e-08	up	18128	9930111A19Rik|Mis6|N1|Tan1|lin-12
chr11	70728201	70729300	diffreps_peak_00021166	6.33488	1099	NM_153103	Kif1c	2.05776	4.62504e-07	1.15987e-05	up	16562	B430105J22Rik|D11Bwg1349e|Ltxs1|Orch3
chr8	71409321	71409740	diffreps_peak_00132688	9.20382	419	NM_172756	Ankle1	4.9573	6.25435e-10	9.93742e-08	up	234396	8430438L13Rik|Ankrd41|C430003I23|Lem3
chr15	84804759	84805110	diffreps_peak_00048132	10.5419	351	NM_001081166	Phf21b	2.18108	2.87156e-11	9.9423e-09	up	271305	A730032D07Rik
chr9	71884921	71885280	diffreps_peak_00142265	5.79086	359	ENSMUST00000184029	Tcf12	2.57763	1.6186e-06	3.25908e-05	up	21406	A130037E08Rik|ALF1|HEB|HEBAlt|HTF-4|HTF4|ME1|REB|bHLHb20
chr5	63898781	63899200	diffreps_peak_00102921	8.13054	419	NM_029554	0610040J01Rik	16.5312	7.40383e-09	5.65163e-07	up	76261	AI662686
chr11	94558001	94558357	diffreps_peak_00023298	8.55327	356	NM_153807	Acsf2	2.04103	2.79727e-09	2.90779e-07	up	264895	-
chr3	34650004	34650920	diffreps_peak_00083663	8.32385	916	NM_011443	Sox2	2.16765	4.74403e-09	4.12616e-07	up	20674	Sox-2|lcc|ysb
chr12	80109021	80110320	diffreps_peak_00030275	8.16383	1299	NM_007564	Zfp36l1	2.74858	6.85757e-09	5.33943e-07	up	12192	AW742437|AW743212|Berg36|Brf1|D530020L18Rik|ERF1|TIS11b|cMG1
chr5	52741573	52741940	diffreps_peak_00102717	6.76061	367	NM_025951	Pi4k2b	4.65684	1.73538e-07	5.32125e-06	up	67073	2610042N09Rik|4933409G22Rik
chr6	148921281	148921640	diffreps_peak_00118063	6.59171	359	NM_019643	Fam60a	10.4957	2.56032e-07	7.24087e-06	up	56306	Ppcs1|Pptcs1|Tera
chr2	150243761	150244220	diffreps_peak_00079210	6.85303	459	NM_001142411	Zfp937	29.1818	1.40272e-07	4.49433e-06	up	245174	EG245174|Gm4979|ZIPO-I
chr6	24505522	24505911	diffreps_peak_00111113	6.94007	389	NM_172535	Iqub	2.61896	1.14796e-07	3.84621e-06	up	214704	4932408B21Rik|Trs4
chr11	112784781	112785660	diffreps_peak_00025444	7.87592	879	NM_011448	Sox9	2.5924	1.3307e-08	8.2552e-07	up	20682	2010306G03Rik|AV220920|mKIAA4243
chr1	17629361	17629700	diffreps_peak_00000543	6.88965	339	NM_053191	Pi15	4.58503	1.28927e-07	4.21665e-06	up	94227	P24TI|P25TI|PI-15|SugarCrisp
chr3	89379341	89379994	diffreps_peak_00085808	6.97044	653	NM_009565	Zbtb7b	2.90542	1.07042e-07	3.64948e-06	up	22724	Thpok|Zfp67|c-Krox
chr15	84680997	84681319	diffreps_peak_00048112	7.28616	322	NM_146061	Prr5	4.24824	5.17415e-08	2.13722e-06	up	109270	AU043908|Arhgap8|C030017C09Rik|C78947|Protor-1|Protor1
chr4	118436940	118437352	diffreps_peak_00094703	9.81796	412	ENSMUST00000006565	Cdc20	2.93562	1.52067e-10	3.33871e-08	up	107995	2310042N09Rik|C87100|p55CDC
chr12	109460041	109460560	diffreps_peak_00032457	6.79353	519	NM_010052	Dlk1	2.62791	1.60869e-07	4.99453e-06	up	13386	AW742678|DLK-1|DlkI|FA1|Ly107|Peg9|SCP1|ZOG|pG2|pref-1
chr3	114030541	114030880	diffreps_peak_00087557	5.15102	339	NM_007729	Col11a1	2.5249	7.06285e-06	0.000112756	up	12814	C530001D20Rik|cho
chr3	8923586	8923900	diffreps_peak_00082564	5.30968	314	ENSMUST00000042148	Mrps28	2.35053	4.90138e-06	8.2771e-05	up	66230	1500012D08Rik|AW061224
chr11	3529981	3530282	diffreps_peak_00016709	7.7789	301	NM_013870	Smtn	3.50992	1.66381e-08	9.56637e-07	up	29856	smsmo
chr2	13574081	13574560	diffreps_peak_00071706	5.86956	479	ENSMUST00000028062	Vim	4.75925	1.35032e-06	2.79429e-05	up	22352	-
chr4	8690405	8690775	diffreps_peak_00089546	10.625	370	NM_001277149	Chd7	3.15246	2.37136e-11	8.91019e-09	up	320790	A730019I05Rik|Cycn|Cyn|Dz|Edy|Flo|GENA 47|GENA 60|Gena 52|Lda|Mt|Obt|Todo|WBE1|Whi|metis
chrX	73491121	73491620	diffreps_peak_00146854	8.37709	499	uc009tlw.2	Bgn	9.40854	4.19669e-09	3.80874e-07	up	12111	BG|DSPG1|PG-S1|PGI|SLRR1A
chr3	89447401	89447940	diffreps_peak_00085847	6.35391	539	NM_146131	Pbxip1	3.25383	4.42675e-07	1.11934e-05	up	229534	4732463H20Rik
chr5	31141401	31141740	diffreps_peak_00101321	6.45517	339	NM_008622	Mpv17	2.05751	3.50616e-07	9.29567e-06	up	17527	Tg.Mpv17
chr11	68211221	68211540	diffreps_peak_00020499	6.78705	319	NM_008744	Ntn1	4.07072	1.63288e-07	5.05713e-06	up	18208	AI561871|BC019633|Netrin-1
chr6	21772221	21772640	diffreps_peak_00111024	7.38741	419	NM_173007	Tspan12	2.63038	4.09815e-08	1.80075e-06	up	269831	9030619E17|AI426782|AI663988|AW111457|Tm4sf12
chr16	38601721	38602180	diffreps_peak_00053052	10.441	459	NM_020260	Arhgap31	2.79523	3.6227e-11	1.16485e-08	up	12549	5830477L08Rik|AU041750|Cdgap|D330026I07Rik
chr19	53310505	53310960	diffreps_peak_00070454	7.63554	455	NM_001008542	Mxi1	3.89908	2.3145e-08	1.19484e-06	up	17859	ENSMUSG00000067085|Gm10197|Mad2|bHLHc11
chr8	86841341	86841920	diffreps_peak_00134001	7.87311	579	NM_030563	N4bp1	2.33539	1.33935e-08	8.2838e-07	up	80750	AI481586|C81621
chr15	103529061	103529400	diffreps_peak_00050049	5.21887	339	NM_008800	Pde1b	3.56025	6.0413e-06	9.84223e-05	up	18574	Pde1b1
chr17	84187643	84187947	diffreps_peak_00061685	6.2477	304	NM_001001806	Zfp36l2	2.73545	5.65324e-07	1.36277e-05	up	12193	Brf2|ERF2|Tis11d
chr1	153332481	153332786	diffreps_peak_00006493	7.33718	305	NM_010683	Lamc1	3.08724	4.60065e-08	1.95865e-06	up	226519	Lamb2
chr7	4523281	4523859	diffreps_peak_00118310	7.44508	578	NM_001033548	Dnaaf3	3.80528	3.58859e-08	1.63654e-06	up	436022	6030429G01Rik|b2b1739Clo
chr3	123112501	123113000	diffreps_peak_00087849	5.13925	499	NM_080451	Synpo2	3.69065	7.25691e-06	0.000115306	up	118449	1110069I04Rik|2310068J10Rik|9530006G20Rik|AI848603|Myo
chrX	163936161	163936860	diffreps_peak_00149217	6.9873	699	NM_009453	Zrsr2	2.70073	1.02968e-07	3.53547e-06	up	22184	35kDa|5031411E02Rik|A230052C13Rik|C77286|U2af1-rs2|URP
chr14	118235741	118236760	diffreps_peak_00043299	9.28049	1019	NM_177753	Sox21	2.84702	5.24212e-10	8.65941e-08	up	223227	Sox25
chr15	10594921	10595280	diffreps_peak_00044147	5.27336	359	uc007vgo.2	Rai14	17	5.32897e-06	8.87945e-05	up	75646	1700008J19Rik|1700020L11Rik|Ankycorbin|Norpeg|mKIAA1334
chr1	73952801	73953560	diffreps_peak_00003060	8.99701	759	NM_027884	Tns1	3.00623	1.0069e-09	1.40776e-07	up	21961	1110018I21Rik|1200014E20Rik|AI648117|E030018G17Rik|E030037J05Rik|Tns
chr15	79358661	79359040	diffreps_peak_00047312	7.11447	379	NM_010755	Maff	4.68555	7.68302e-08	2.87486e-06	up	17133	-
chr10	80433319	80433653	diffreps_peak_00013332	7.95894	334	NM_011548	Tcf3	2.83353	1.09915e-08	7.29795e-07	up	21423	A1|AA408400|ALF2|AW209082|E12|E12/E47|E2A|E47|ME2|Pan1|Pan2|TCF-3|Tcfe2a|VDIR|bHLHb21
chr4	123735601	123736200	diffreps_peak_00095169	10.8218	599	NM_023423	Akirin1	2.62565	1.50722e-11	6.63748e-09	up	68050	6330407G11Rik
chr2	167062933	167063297	diffreps_peak_00081281	8.02097	364	NM_001081005	1500012F01Rik	6.41304	9.52867e-09	6.68226e-07	up	NA	NA
chr13	111808502	111808993	diffreps_peak_00038011	10.5616	491	ENSMUST00000109267	Map3k1	2.51769	2.74421e-11	9.6359e-09	up	26401	MAPKKK1|MEKK1|Mekk
chr11	69734301	69735566	diffreps_peak_00020835	7.22411	1265	NM_001291068	Polr2a	2.43178	5.9689e-08	2.36035e-06	up	20020	220kDa|Rpb1|Rpo2-1
chr7	15950401	15950792	diffreps_peak_00118814	7.59426	391	NM_153068	Ehd2	3.34256	2.54528e-08	1.27774e-06	up	259300	BC027084|C130052H20Rik
chr9	54544821	54545140	diffreps_peak_00140680	7.71716	319	ENSMUST00000041901	Cib2	8.66351	1.91796e-08	1.05081e-06	up	56506	2810434I23Rik|AI449053
chr1	131847561	131848020	diffreps_peak_00005516	6.94956	459	NM_173865	Slc41a1	2.35058	1.12315e-07	3.78566e-06	up	98396	AI573938|B230315F01Rik
chr1	172369941	172370500	diffreps_peak_00007886	6.84552	559	NM_001039484	Kcnj10	3.43374	1.42718e-07	4.5543e-06	up	16513	BIR10|BIRK-1|Kir1.2|Kir4.1
chr10	4353281	4355420	diffreps_peak_00009329	8.05708	2139	NM_031185	Akap12	2.62454	8.76837e-09	6.31425e-07	up	83397	AI317366|SSeCKS|Srcs5|Tsga12
chr4	132370761	132371120	diffreps_peak_00096450	5.92808	359	NM_175306	Phactr4	2.91649	1.18011e-06	2.49789e-05	up	100169	3110001B12Rik|AI527228|AW495572|C330013F19Rik|N28169|mKIAA4120
chr18	67402101	67402460	diffreps_peak_00065627	6.54525	359	NM_026473	Tubb6	2.69467	2.84936e-07	7.84364e-06	up	67951	2310057H16Rik|BB220206
chr5	137745921	137746414	diffreps_peak_00108981	10.6056	493	ENSMUST00000100540	Tsc22d4	2.58019	2.47996e-11	9.15881e-09	up	78829	0610009M14Rik|1700023B23Rik|AI415410|Thg-1pit|Tilz2
chr11	55395301	55395613	diffreps_peak_00019487	9.57895	312	NM_009242	Sparc	3.61025	2.63664e-10	5.04424e-08	up	20692	BM-40|ON
chr10	10545041	10545400	diffreps_peak_00009712	7.36943	359	NM_026405	Rab32	10.0331	4.27144e-08	1.85188e-06	up	67844	2810011A17Rik|AU022057
chr4	89137221	89137524	diffreps_peak_00093001	6.99716	303	ENSMUST00000058030	Mtap	2.75181	1.00655e-07	3.48686e-06	up	66902	1300019I21Rik|MSAP
chr4	156028561	156028880	diffreps_peak_00099522	6.95774	319	NM_009400	Tnfrsf18	4.38976	1.10219e-07	3.73349e-06	up	21936	AITR|Gitr
chr9	102720541	102720876	diffreps_peak_00143527	10.4898	335	NM_019764	Amotl2	2.53213	3.2377e-11	1.07774e-08	up	56332	AW549739|C79691|Lccp|MASCOT|mKIAA0989
chr4	147754741	147755720	diffreps_peak_00098288	6.73846	979	NM_001127189	Gm13157	3.3949	1.82617e-07	5.54734e-06	up	NA	NA
chr18	80969381	80969780	diffreps_peak_00066693	11.3392	399	NM_178280	Sall3	2.96948	4.57901e-12	3.32546e-09	up	20689	B130022O04Rik|Msal|Msal-1|Sal|Salt|Spalt
chr1	171259441	171259880	diffreps_peak_00007731	6.56077	439	NM_172845	Adamts4	13.4921	2.74934e-07	7.61329e-06	up	240913	3830423K05|ADAM-TS4|ADAMTS-2|ADMP-1|mKIAA0688
chr12	8990461	8990980	diffreps_peak_00027538	5.78954	519	uc007nah.2	Wdr35	2.65079	1.62352e-06	3.26866e-05	up	74682	4930459M12Rik|4931430C06|mKIAA1336
chr16	33726521	33727280	diffreps_peak_00052528	7.36178	759	NM_175256	Heg1	4.15614	4.34728e-08	1.87922e-06	up	77446	4632417D23Rik|5530401I02Rik|9530025L16Rik|BC038614|Gm629|OTTMUSG00000027315
chr9	87192501	87192880	diffreps_peak_00142849	10.3614	379	NM_199316	Cep162	6.96807	4.35106e-11	1.35726e-08	up	382090	4922501C03Rik|mKIAA1009
chr1	172026997	172027440	diffreps_peak_00007808	7.82217	443	uc007dpi.1	Vangl2	2.14085	1.50602e-08	8.92953e-07	up	93840	C530001F03Rik|Lootl|Lp|Lpp1|Ltap|Vang1l2|loop-tail|ska17|ska<m17Jus>|stbm|strabismus
chr13	75943530	75943925	diffreps_peak_00036575	10.2804	395	ENSMUST00000109606	Rhobtb3	4.5833	5.24277e-11	1.53185e-08	up	73296	1700040C17Rik|2610033K01Rik|4930503C18Rik|AI317148|AW208826|mKIAA0878
chr8	108955981	108956920	diffreps_peak_00135273	9.02505	939	NM_007496	Zfhx3	2.27804	9.43961e-10	1.34633e-07	up	11906	A230102L03Rik|Atbf1|Sci|WBP9|mKIAA4228
chr1	34178281	34178680	diffreps_peak_00001076	6.01483	399	NM_010081	Dst	2.17324	9.6644e-07	2.11277e-05	up	13518	2310001O04Rik|A830042E19Rik|AW554249|BP230|BPAG1-n|Bpag|Bpag1|Macf2|ah|athetoid|dt|mKIAA0728|nmf203|nmf339
chr9	99629577	99629962	diffreps_peak_00143368	5.32649	385	ENSMUST00000112885	Dzip1l	2.04457	4.71527e-06	8.0078e-05	up	72507	2610524A10Rik|AI663976
chr2	25056461	25056875	diffreps_peak_00072218	5.29633	414	uc008iqa.1	Nsmf	2.73264	5.05439e-06	8.48753e-05	up	56876	Jacob|Nelf
chr1	127823201	127823520	diffreps_peak_00005305	5.16829	319	NM_011737	Map3k19	3.98238	6.78756e-06	0.000108895	up	22625	Ysk4
chr10	60712981	60713460	diffreps_peak_00011799	6.47862	479	NM_023596	Slc29a3	3.45633	3.32187e-07	8.89503e-06	up	71279	4933435C21Rik|AW987637|Ent3
chr5	134703481	134703824	diffreps_peak_00108425	7.57787	343	NM_007925	Eln	2.18216	2.64321e-08	1.30982e-06	up	13717	AI385707|AI480567|E030024M20Rik
chr1	172372521	172372920	diffreps_peak_00007888	6.70101	399	NM_001039484	Kcnj10	2.4788	1.99064e-07	5.94321e-06	up	16513	BIR10|BIRK-1|Kir1.2|Kir4.1
chr1	73914241	73914674	diffreps_peak_00003041	7.05779	433	NM_027884	Tns1	4.08716	8.75415e-08	3.14402e-06	up	21961	1110018I21Rik|1200014E20Rik|AI648117|E030018G17Rik|E030037J05Rik|Tns
chr3	123113741	123114626	diffreps_peak_00087850	7.54651	885	NM_080451	Synpo2	2.70887	2.84109e-08	1.38145e-06	up	118449	1110069I04Rik|2310068J10Rik|9530006G20Rik|AI848603|Myo
chr17	35852414	35853888	diffreps_peak_00058829	7.74607	1474	NM_001010833	Mdc1	2.46285	1.79443e-08	1.00395e-06	up	240087	6820401C03|AA413496|Nfbd1|mKIAA0170
chr5	76208721	76209060	diffreps_peak_00103586	5.04156	339	NM_011626	Tmem165	4.46647	9.08747e-06	0.000140411	up	21982	AV026557|Tpardl|Tparl|pFT27
chr10	116510061	116510380	diffreps_peak_00015398	5.39748	319	NM_001037848	Cnot2	7.24786	4.00422e-06	6.95849e-05	up	72068	2600016M12Rik|2810470K03Rik|AA537049|AA959607|AW557563|C79650
chr11	73137181	73137600	diffreps_peak_00021356	6.97883	419	NM_010353	Gsg2	2.05794	1.04995e-07	3.58831e-06	up	14841	Haspin
chr16	62928821	62929160	diffreps_peak_00054027	7.34749	339	NM_011173	Pros1	7.93141	4.49276e-08	1.9247e-06	up	19128	AW214361
chr18	34861001	34861786	diffreps_peak_00063679	6.02973	785	ENSMUST00000064795	Egr1	2.76962	9.33829e-07	2.05302e-05	up	13653	A530045N19Rik|ETR103|Egr-1|Krox-1|Krox-24|Krox24|NGF1-A|NGFI-A|NGFIA|TIS8|Zenk|Zfp-6|Zif268|egr
chr1	59482461	59483240	diffreps_peak_00002319	8.56594	779	NM_008057	Fzd7	3.34841	2.71679e-09	2.89468e-07	up	14369	Fz7
chr15	57822461	57822860	diffreps_peak_00045782	10.9499	399	NM_199449	Zhx2	2.23192	1.12218e-11	5.51068e-09	up	387609	Afr-1|Afr1|Raf|mKIAA0854
chr5	36484587	36485520	diffreps_peak_00102031	7.26583	933	NM_025725	Ccdc96	2.19975	5.42215e-08	2.20568e-06	up	66717	4921513E08Rik
chr10	128041201	128042580	diffreps_peak_00016392	6.84721	1379	NM_001113199	Naca	2.52587	1.42165e-07	4.53957e-06	up	17938	AL022831|AL024382|Gm1878|mKIAA0363|skNAC
chr2	31803161	31803560	diffreps_peak_00073234	8.26717	399	NM_009594	Abl1	2.3874	5.40549e-09	4.54602e-07	up	11350	AI325092|Abl|E430008G22Rik|c-Abl
chr15	78524461	78524880	diffreps_peak_00047120	8.85231	419	NM_028331	C1qtnf6	3.41516	1.40504e-09	1.81477e-07	up	72709	2810036M19Rik|CTRP6
chr11	20650101	20650520	diffreps_peak_00017537	7.793	419	NM_021372	Sertad2	4.42753	1.61063e-08	9.3596e-07	up	58172	AB041541|AU021878|Kiaa0127|MNCb-1504|SEI-2|Sei2|TRIP-Br2|mKIAA0127
chr8	45036841	45037180	diffreps_peak_00131232	9.56441	339	NM_001081286	Fat1	2.44586	2.72642e-10	5.17608e-08	up	14107	2310038E12Rik|AU023433|Fath|mFat1
chr4	43523240	43523595	diffreps_peak_00091100	7.59013	355	ENSMUST00000107914	Tpm2	6.02125	2.56965e-08	1.28581e-06	up	22004	Tpm-2|Trop-2
chr7	45082912	45083363	diffreps_peak_00121716	7.78812	451	ENSMUST00000019683	Rcn3	4.29084	1.62885e-08	9.42957e-07	up	52377	6030455P07Rik|D530026G20Rik|D7Ertd671e|RLP49
chr16	4649101	4649460	diffreps_peak_00050229	8.23807	359	NM_139307	Vasn	2.85694	5.77998e-09	4.7632e-07	up	246154	2610528G05Rik|Atia|Slitl2
chr1	74368392	74368920	diffreps_peak_00003122	7.71748	528	NM_001033345	Catip	4.11932	1.91656e-08	1.05081e-06	up	241112	Gm216
chr3	95011521	95012080	diffreps_peak_00086207	7.26437	559	NM_030074	Zfp687	2.32424	5.44039e-08	2.21025e-06	up	78266	4931408L03Rik|Znf687|mKIAA1441
chr3	67463585	67463926	diffreps_peak_00084633	6.87208	341	ENSMUST00000058981	Lxn	2.72525	1.34252e-07	4.35773e-06	up	17035	-
chr11	75575841	75576260	diffreps_peak_00021583	6.94649	419	NM_173388	Slc43a2	3.30187	1.13111e-07	3.80539e-06	up	215113	7630402D21Rik|BC042513|Lat4
chr15	97744841	97745280	diffreps_peak_00049173	7.62667	439	NM_144850	Rapgef3	2.79675	2.36228e-08	1.21321e-06	up	223864	2310016P22Rik|9330170P05Rik|Epac|Epac1
chr16	90386396	90386716	diffreps_peak_00054909	6.31635	320	NM_015755	Hunk	2.27403	4.82671e-07	1.19683e-05	up	26559	Bstk1|Mak-v
chrX	42212241	42212680	diffreps_peak_00146232	7.29661	439	uc009taw.1	Stag2	11.3182	5.05113e-08	2.10129e-06	up	20843	9230105L23Rik|B230112I07Rik|SA-2|SAP2
chr11	116334601	116335000	diffreps_peak_00026008	6.95969	399	uc007mkw.1	Foxj1	2.91325	1.09725e-07	3.7205e-06	up	15223	FKHL-13|HFH-4|Hfh4
chr7	19092949	19093821	diffreps_peak_00119270	6.9296	872	ENSMUST00000032568	Dmpk	4.06204	1.17598e-07	3.92113e-06	up	13400	DM|DMK|Dm15|MDPK|MT-PK
chr7	4944141	4944480	diffreps_peak_00118451	6.19542	339	NM_173008	Ssc5d	4.64692	6.37647e-07	1.4994e-05	up	269855	A430110N23Rik|S5D-SRCRB
chr11	114752856	114753260	diffreps_peak_00025703	8.39705	404	uc007mfp.1	Dnaic2	2.7947	4.00818e-09	3.68656e-07	up	432611	C030015H18Rik|Dnai2|Gm728
chr3	5242921	5243280	diffreps_peak_00082466	5.10164	359	NM_030708	Zfhx4	2.52839	7.91333e-06	0.000124391	up	80892	A930021B15|C130041O22Rik|Zfh-4|Zfh4
chr13	72630601	72630976	diffreps_peak_00036461	7.30526	375	NM_010574	Irx2	7.52577	4.95153e-08	2.07027e-06	up	16372	-
chr14	54920001	54920414	diffreps_peak_00040924	6.68517	413	NM_010112	Efs	3.671	2.06459e-07	6.11431e-06	up	13644	-
chr8	36139351	36139880	diffreps_peak_00131027	7.5308	529	NM_172911	D8Ertd82e	2.54163	2.94581e-08	1.41921e-06	up	244418	9830148H23|NACK|Sgk223|mFLJ00269
chr9	85842781	85843180	diffreps_peak_00142774	6.57909	399	ENSMUST00000069896	9330154J02Rik	2.28825	2.63582e-07	7.39012e-06	up	442799	-
chr4	43514841	43515220	diffreps_peak_00091096	8.36449	379	NM_009416	Tpm2	14.1078	4.32024e-09	3.85959e-07	up	22004	Tpm-2|Trop-2
chr3	95106375	95106930	diffreps_peak_00086227	10.8354	555	NM_008847	Pip5k1a	2.1814	1.46091e-11	6.53259e-09	up	18720	PI4P5K-I[a]|PIP5K1-alpha|PIP5KIalpha|Pipk5a
chr1	34177801	34178200	diffreps_peak_00001075	7.264	399	NM_010081	Dst	3.20254	5.44497e-08	2.21043e-06	up	13518	2310001O04Rik|A830042E19Rik|AW554249|BP230|BPAG1-n|Bpag|Bpag1|Macf2|ah|athetoid|dt|mKIAA0728|nmf203|nmf339
chr5	115453825	115454240	diffreps_peak_00106056	6.83666	415	ENSMUST00000150779	Msi1	2.48559	1.45661e-07	4.62369e-06	up	17690	Msi1h|Musahi1|m-Msi-1
chr11	20647921	20648340	diffreps_peak_00017534	6.38519	419	NM_021372	Sertad2	2.34375	4.11918e-07	1.05545e-05	up	58172	AB041541|AU021878|Kiaa0127|MNCb-1504|SEI-2|Sei2|TRIP-Br2|mKIAA0127
chr1	135364621	135365169	diffreps_peak_00005949	9.76597	548	NM_053106	Lmod1	3.77932	1.71409e-10	3.66841e-08	up	93689	9530015K06Rik|SM-Lmod
chr8	12395501	12397040	diffreps_peak_00129583	8.65635	1539	ENSMUST00000180353	Sox1	2.29204	2.20623e-09	2.52276e-07	up	20664	BB176347|Sox-1
chr18	37748301	37748640	diffreps_peak_00064052	5.43951	339	NM_033593	Pcdhga10	2.06226	3.63486e-06	6.42658e-05	up	93722	-
chr8	108946316	108947020	diffreps_peak_00135265	8.19047	704	NM_007496	Zfhx3	2.60392	6.44955e-09	5.11407e-07	up	11906	A230102L03Rik|Atbf1|Sci|WBP9|mKIAA4228
chr11	68386609	68387012	diffreps_peak_00020525	6.51498	403	ENSMUST00000135141	Ntn1	2.11951	3.05506e-07	8.31071e-06	up	18208	AI561871|BC019633|Netrin-1
chr10	81396981	81397420	diffreps_peak_00013672	6.41608	439	NM_008688	Nfic	2.35799	3.83637e-07	9.99088e-06	up	18029	1110019L22Rik|1500041O16Rik|AA589446|AI746521|NF1-C
chr3	57457161	57457500	diffreps_peak_00084344	7.53082	339	NM_133784	Wwtr1	4.61854	2.94561e-08	1.41921e-06	up	97064	2310058J06Rik|2610021I22Rik|C78399|Taz
chr11	94951472	94951820	diffreps_peak_00023360	7.94689	348	NM_007742	Col1a1	4.80558	1.13008e-08	7.43367e-07	up	12842	Col1a-1|Cola-1|Cola1|Mov-13|Mov13
chr18	67401501	67401880	diffreps_peak_00065626	7.50398	379	NM_026473	Tubb6	5.19352	3.13341e-08	1.48612e-06	up	67951	2310057H16Rik|BB220206
chr6	72788709	72789254	diffreps_peak_00113586	7.69373	545	ENSMUST00000069536	Tcf7l1	3.97338	2.02429e-08	1.09135e-06	up	21415	Tcf-3|Tcf3|bHLHb21
chr12	76388741	76389060	diffreps_peak_00030072	7.92587	319	ENSMUST00000042779	Zbtb1	19.9615	1.18612e-08	7.66252e-07	up	268564	9430077A12|AI256369|Bsg2|C430003J21Rik
chr2	4717830	4718180	diffreps_peak_00071229	6.36459	350	NM_178663	Bend7	8.65873	4.31926e-07	1.09621e-05	up	209645	1110017O21Rik|E130319B15Rik
chr15	6435164	6435620	diffreps_peak_00043980	11.3985	456	NM_023118	Dab2	5.99473	3.99458e-12	3.01328e-09	up	13132	5730435J12Rik|AA960054|AI957090|D15Wsu122e|D630005B22Rik|Doc-2|Doc2|p96
chr11	102604841	102605340	diffreps_peak_00024555	8.57897	499	NM_020510	Fzd2	6.9416	2.63649e-09	2.83654e-07	up	57265	AL033370|AW456835|Fz10|Fzd10|Mfz10|Mfz10a
chr2	160758321	160758880	diffreps_peak_00080481	9.23993	559	uc008nrc.1	Plcg1	3.3377	5.75536e-10	9.28306e-08	up	18803	AI894140|Cded|Plc-1|Plc-gamma1|Plcg-1
chr18	60918261	60918561	diffreps_peak_00065167	6.85714	300	ENSMUST00000040359	Arsi	4.83812	1.3895e-07	4.46444e-06	up	545260	BC020108
chr9	71725621	71725960	diffreps_peak_00142258	8.84654	339	NM_026599	Cgnl1	11.4064	1.42385e-09	1.8331e-07	up	68178	4933421H10Rik|9930020M10Rik|AI503810|Jacop
chr11	63158681	63159100	diffreps_peak_00020247	8.18112	419	NM_008885	Pmp22	2.19987	6.58987e-09	5.19419e-07	up	18858	22kDa|Gas-3|HNPP|Tr|trembler
chr10	121371143	121371500	diffreps_peak_00015808	5.23974	357	uc007hfn.1	Gns	2.40909	5.75791e-06	9.44458e-05	up	75612	2610016K11Rik|AU042285|C87209|G6S|N28088
chr16	97490161	97491080	diffreps_peak_00055554	5.99508	919	ENSMUST00000177820	Gm9242	7.51864	1.01139e-06	2.19748e-05	up	668559	EG668559
chr2	79635351	79635744	diffreps_peak_00075638	8.92266	393	ENSMUST00000111785	Ssfa2	2.22404	1.19493e-09	1.59766e-07	up	70599	5730488C15Rik|CS-1|CS1|KRAP|SPAG13|mKIAA1927
chr11	62222401	62222880	diffreps_peak_00020170	6.8626	479	NM_001029936	Specc1	2.83161	1.37216e-07	4.42859e-06	up	432572	2810012G08Rik|B230396K10Rik|Cytsb
chr7	142653241	142653720	diffreps_peak_00128572	8.34703	479	NM_010514	Igf2	4.48967	4.49746e-09	3.95389e-07	up	16002	AL033362|Igf-2|Igf-II|M6pr|Mpr|Peg2
chr13	112987861	112988260	diffreps_peak_00038054	7.07729	399	NM_001081062	Ccno	3.48292	8.36968e-08	3.04396e-06	up	218630	C86987|Ccnu|E130318K11|Ung2
chr17	6738301	6738660	diffreps_peak_00055974	9.10527	359	NM_009510	Ezr	2.80513	7.84739e-10	1.17676e-07	up	22350	AW146364|R75297|Vil2|p81
chr1	34723601	34724120	diffreps_peak_00001145	8.97852	519	uc007ape.1	AK082264	2.94625	1.0507e-09	1.44608e-07	up	NA	NA
chr14	19768209	19768520	diffreps_peak_00038843	7.51825	311	NM_008695	Nid2	6.12488	3.03216e-08	1.45259e-06	up	18074	AW547149|Ly111|NID-2|entactin-2|nidogen-2
chr15	76178021	76178385	diffreps_peak_00046758	7.08124	364	NM_011117	Plec	3.45502	8.29388e-08	3.02193e-06	up	18810	AA591047|AU042537|EBS1|PCN|PLTN|Plec1
chrX	102643846	102644246	diffreps_peak_00147744	6.72584	400	NM_008832	Phka1	2.27945	1.88003e-07	5.67533e-06	up	18679	5330411D17|9830108K24Rik|Phka
chr19	17119261	17119740	diffreps_peak_00068481	9.81638	479	NM_181348	Prune2	5.10492	1.52625e-10	3.34101e-08	up	353211	6330414G02Rik|A230083H22Rik|A330102H22Rik|Bmcc1|mKIAA0367
chr1	181166180	181166480	diffreps_peak_00008532	7.02321	300	NM_030131	Cnih4	2.47378	9.4797e-08	3.3399e-06	up	98417	AI647760|AW050376|CNIH-4|D530030D03Rik|E430023H19Rik|HSPC163
chr7	65156181	65156570	diffreps_peak_00123132	7.77923	389	ENSMUST00000119118	Fam189a1	6.96314	1.66254e-08	9.56319e-07	up	70638	5730507A09Rik|AW047451
chr3	34651121	34651560	diffreps_peak_00083664	8.96617	439	NM_011443	Sox2	2.35894	1.08101e-09	1.48051e-07	up	20674	Sox-2|lcc|ysb
chr5	92941501	92941920	diffreps_peak_00104216	11.0603	419	NM_015756	Shroom3	2.81648	8.70452e-12	4.80277e-09	up	27428	AL022960|D5Ertd287e|Shrm|Shrm3
chr8	108794221	108794969	diffreps_peak_00135252	7.43294	748	NM_007496	Zfhx3	2.20427	3.69028e-08	1.66694e-06	up	11906	A230102L03Rik|Atbf1|Sci|WBP9|mKIAA4228
chr11	105988921	105989320	diffreps_peak_00024896	6.40084	399	NM_009598	Ace	7.01212	3.97342e-07	1.02616e-05	up	11421	AW208573|CD143
chr3	153905761	153906138	diffreps_peak_00089122	5.58411	377	NM_031870	Msh4	4.42586	2.60548e-06	4.84839e-05	up	55993	4930485C04Rik|AV144863|mMsh4
chr3	95676200	95676640	diffreps_peak_00086333	6.19874	440	NM_144899	Adamtsl4	3.82399	6.32788e-07	1.49151e-05	up	229595	ADAMTSL-4|Tsrc1
chr1	73924741	73925540	diffreps_peak_00003047	9.87517	799	NM_027884	Tns1	3.97962	1.33301e-10	3.03277e-08	up	21961	1110018I21Rik|1200014E20Rik|AI648117|E030018G17Rik|E030037J05Rik|Tns
chr7	112427781	112428100	diffreps_peak_00126133	7.84977	319	NM_020606	Parva	2.75233	1.41327e-08	8.57174e-07	up	57342	2010012A22Rik|5430400F08Rik|AI225929|AU042898|Actp|CH-ILKBP|Parvin
chr19	40376644	40377016	diffreps_peak_00069450	12.4258	372	NM_178362	Sorbs1	4.5489	3.7512e-13	9.79112e-10	up	20411	2310065E01Rik|9530001P15Rik|CAP|SH3P12|Sh3d5|mKIAA1296
chr10	78589901	78590243	diffreps_peak_00012985	11.535	342	NM_027875	Syde1	3.49504	2.91768e-12	2.49501e-09	up	71709	1200008N06Rik|BB043000|mSYD1A
chr2	84650321	84650745	diffreps_peak_00075781	6.61065	424	ENSMUST00000111675	Ctnnd1	2.25362	2.45102e-07	6.98554e-06	up	12388	AA409437|AU019353|Catns|Ctnnd|P120|mKIAA0384
chr1	172003601	172003940	diffreps_peak_00007791	6.86273	339	ENSMUST00000027837	Vangl2	2.56377	1.37174e-07	4.42851e-06	up	93840	C530001F03Rik|Lootl|Lp|Lpp1|Ltap|Vang1l2|loop-tail|ska17|ska<m17Jus>|stbm|strabismus
chr10	4355741	4356180	diffreps_peak_00009330	6.4328	439	NM_031185	Akap12	2.52494	3.69144e-07	9.69745e-06	up	83397	AI317366|SSeCKS|Srcs5|Tsga12
chr14	54577061	54577661	diffreps_peak_00040838	11.1812	600	NM_010590	Ajuba	2.95727	6.58813e-12	4.18921e-09	up	16475	Jub
chr8	44950781	44951160	diffreps_peak_00131219	10.5879	379	NM_001081286	Fat1	2.53205	2.58292e-11	9.31877e-09	up	14107	2310038E12Rik|AU023433|Fath|mFat1
chr9	20770281	20770780	diffreps_peak_00137848	11.7164	499	NM_016919	Col5a3	4.78644	1.92122e-12	2.03177e-09	up	53867	-
chr9	65554881	65555260	diffreps_peak_00141720	8.8023	379	NM_153119	Plekho2	10.0265	1.57651e-09	1.97329e-07	up	102595	AI840980|Plekhq1
chr17	33999733	34000063	diffreps_peak_00058457	7.39968	330	ENSMUST00000173075	H2-K1	2.52085	3.98403e-08	1.76389e-06	up	14972	H-2K|H-2K(d)|H2-K|K-f
