# Supplementary material for: The landscape of m1A modification and its posttranscriptional regulatory functions in primary neurons
Source: eLife. 2023 Mar 7;12:e85324. doi: 10.7554/eLife.85324 (PMC9991057; doi:10.7554/eLife.85324)
Supplement: Figure 3—source data 1. [file elife-85324-fig3-data1.xlsx]

## Sheet: Control-m1A_lncRNA
Chromosome	Transcript start	Transcript end	Peak ID	Score	Peak length	Transcript ID	Gene mame	P value (-log10)	Fold Enrichment	FDR	Source	RNA length	Coordinates	Relationship	Associated gene ID	Associated gene name	Associated gene coordinates
chrX	101444687	101445334	MACS_peak_150124	3206.53	647	ENSMUST00000136251	Nono	3206.53	5.96	0	Ensembl	1337	chrX:101443306-101447902+	exon sense-overlapping	ENSMUST00000033673	Nono	chrX:101429555-101448591+
chr8	83570645	83570998	MACS_peak_153176	3173.9	353	ENSMUST00000127162	Ndufb7	3173.9	28.42	0	Ensembl	4435	chr8:83566758-83571626+	exon sense-overlapping	ENSMUST00000036996	Ndufb7	chr8:83566671-83571626+
chr2	30981777	30982201	MACS_peak_98439	3152.19	424	ENSMUST00000156325	BC005624	3152.19	17.92	17.86	Ensembl	1064	chr2:30980903-30982201-	exon sense-overlapping	ENSMUST00000028205	BC005624	chr2:30972833-30981941-
chr1	89678334	89678823	MACS_peak_6140	3147.76	489	NR_015540	4933400F21Rik	3147.76	55.3	16.67	RefSeq	3611	chr1:89676507-89683892-	intronic antisense	ENSMUST00000027521	Agap1	chr1:89454811-89895282+
chr4	136339018	136340314	MACS_peak_131695	3120.65	1296	ENSMUST00000182327	Hnrnpr	3120.65	11.09	12.5	Ensembl	3948	chr4:136339019-136342966+	exon sense-overlapping	ENSMUST00000084219	Hnrnpr	chr4:136311025-136340863+
chr5	108434025	108434397	MACS_peak_108544	3120.61	372	ENSMUST00000123184	Atp5k	3120.61	7.94	0	Ensembl	563	chr5:108433246-108434397-	exon sense-overlapping	ENSMUST00000049628	Atp5k	chr5:108433244-108434448-
chr1	87543634	87544280	MACS_peak_5957	3100	646	ENSMUST00000172004	Gm6153	3100	140.1	11.62	Ensembl	1058	chr1:87543635-87544692-	intron sense-overlapping	ENSMUST00000068681	Ngef	chr1:87476834-87573870-
chr1	150440066	150440529	MACS_peak_9424	3100	463	ENSMUST00000132257	Tpr	3100	21.23	11.62	Ensembl	934	chr1:150437435-150443222+	exon sense-overlapping	ENSMUST00000119161	Tpr	chr1:150393250-150449935+
chr1	172200210	172200581	MACS_peak_11508	3100	371	ENSMUST00000152432	Pea15a	3100	16.39	11.62	Ensembl	1015	chr1:172199775-172206804-	exon sense-overlapping	ENSMUST00000013842	Pea15a	chr1:172196728-172206804-
chr11	5071519	5071890	MACS_peak_23794	3100	371	ENSMUST00000130060	Ewsr1	3100	60.66	11.62	Ensembl	898	chr11:5070690-5072220-	exon sense-overlapping	ENSMUST00000073308	Ewsr1	chr11:5069698-5099067-
chr11	58042435	58043013	MACS_peak_27627	3100	578	ENSMUST00000140500	Larp1	3100	24.47	11.62	Ensembl	747	chr11:58041613-58043013+	exon sense-overlapping	ENSMUST00000071487	Larp1	chr11:58009064-58062031+
chr11	75751682	75752080	MACS_peak_29469	3100	398	ENSMUST00000155057	Ywhae	3100	11.57	11.62	Ensembl	815	chr11:75751604-75759315+	exon sense-overlapping	ENSMUST00000067664	Ywhae	chr11:75732869-75765845+
chr11	77842147	77843870	MACS_peak_29794	3100	1723	ENSMUST00000100443	Myo18a	3100	16.84	11.62	Ensembl	3807	chr11:77840933-77844878+	exon sense-overlapping	ENSMUST00000000645	Myo18a	chr11:77777265-77865980+
chr11	84869730	84870096	MACS_peak_30834	3100	366	uc033fyy.1	Ggnbp2os	3100	31.98	11.62	UCSC_knowngene	486	chr11:84869731-84871323+	intronic antisense	ENSMUST00000170741	Ggnbp2	chr11:84834512-84870725-
chr11	99213119	99213443	MACS_peak_32189	3100	324	ENSMUST00000156160	Smarce1	3100	22.3	11.62	Ensembl	610	chr11:99209992-99213443-	exon sense-overlapping	ENSMUST00000103133	Smarce1	chr11:99209047-99231017-
chr12	80947495	80948674	MACS_peak_40550	3100	1179	ENSMUST00000133783	Srsf5	3100	16.64	11.62	Ensembl	2919	chr12:80945520-80950503+	exon sense-overlapping	ENSMUST00000094693	Srsf5	chr12:80945504-80950507+
chr12	83663489	83664259	MACS_peak_41100	3100	770	uc007odn.1	Rbm25	3100	17.73	11.62	UCSC_knowngene	2949	chr12:83661618-83668508+	exon sense-overlapping	ENSMUST00000048155	Rbm25	chr12:83632252-83683123+
chr12	109558639	109571726	MACS_peak_43443	3100	13087	ENSMUST00000146701	Meg3	3100	36.25	11.62	Ensembl	14548	chr12:109545398-109571726+	intergenic	NA	NA	NA
chr13	47105380	47105737	MACS_peak_47381	3100	357	ENSMUST00000150652	Dek	3100	14.15	11.62	Ensembl	468	chr13:47105381-47106183-	exon sense-overlapping	ENSMUST00000021807	Dek	chr13:47084782-47106190-
chr13	55481538	55482257	MACS_peak_48048	3100	719	ENSMUST00000175813	Dbn1	3100	14.4	11.62	Ensembl	732	chr13:55481400-55482257-	exon sense-overlapping	ENSMUST00000021950	Dbn1	chr13:55473429-55488111-
chr13	74864732	74865356	MACS_peak_49312	3100	624	ENSMUST00000129154	Hnrnpa1l2-ps	3100	133.57	11.62	Ensembl	966	chr13:74864305-74865356+	intergenic	NA	NA	NA
chr14	8799588	8800294	MACS_peak_52442	3100	706	ENSMUST00000052615	Gm9800	3100	67.22	11.62	Ensembl	914	chr14:8799589-8800504-	intergenic	NA	NA	NA
chr14	118982657	118983420	MACS_peak_60166	3100	763	uc007uzf.1	AK014089	3100	31.25	11.62	UCSC_knowngene	1910	chr14:118982658-118984661-	intergenic	NA	NA	NA
chr14	122117937	122119009	MACS_peak_60689	3100	1072	ENSMUST00000168178	Gm6254	3100	274.77	11.62	Ensembl	1072	chr14:122117938-122119009+	intron sense-overlapping	ENSMUST00000026624	Tm9sf2	chr14:122107038-122159604+
chr15	86194748	86195280	MACS_peak_66904	3100	532	uc029sug.1	AK155692	3100	12.63	11.62	UCSC_knowngene	532	chr15:86194749-86195280+	intergenic	NA	NA	NA
chr15	93234362	93234700	MACS_peak_67513	3100	338	ENSMUST00000083977	Gm24447	3100	5.82	11.62	Ensembl	338	chr15:93234363-93234700+	intergenic	NA	NA	NA
chr16	20651715	20652300	MACS_peak_70893	3100	585	ENSMUST00000169195	Psmd2	3100	45.46	11.62	Ensembl	747	chr16:20651716-20652754+	exon sense-overlapping	ENSMUST00000007212	Psmd2	chr16:20651652-20663414+
chr17	34601313	34601988	MACS_peak_80132	3100	675	ENSMUST00000174475	Rnf5	3100	35.78	11.62	Ensembl	850	chr17:34601314-34603376-	exon sense-overlapping	ENSMUST00000015622	Rnf5	chr17:34601091-34603690-
chr17	56584824	56585350	MACS_peak_81552	3100	526	ENSMUST00000182031	Safb	3100	26.9	11.62	Ensembl	1755	chr17:56584825-56596523+	exon sense-overlapping	ENSMUST00000095224	Safb	chr17:56585059-56606294+
chr17	87435603	87435934	MACS_peak_84080	3100	331	ENSMUST00000143965	Calm2	3100	14.84	11.62	Ensembl	890	chr17:87433720-87446848-	exon sense-overlapping	ENSMUST00000040440	Calm2	chr17:87433412-87446935-
chr18	75521048	75522136	MACS_peak_90148	3100	1088	NR_045879	Gm10532	3100	21.14	11.62	RefSeq	2301	chr18:75514645-75522806+	natural antisense	ENSMUST00000165559	Ctif	chr18:75431224-75697696-
chr19	5423771	5424220	MACS_peak_91456	3100	449	ENSMUST00000125468	Drap1	3100	14.31	11.62	Ensembl	939	chr19:5422809-5424220-	exon sense-overlapping	ENSMUST00000025853	Drap1	chr19:5422811-5424979-
chr19	24289715	24290760	MACS_peak_92777	3100	1045	ENSMUST00000118970	Gm16216	3100	86.14	11.62	Ensembl	1111	chr19:24289716-24290826+	intergenic	NA	NA	NA
chr2	32375496	32376122	MACS_peak_98682	3100	626	ENSMUST00000134141	Ciz1	3100	30.15	11.62	Ensembl	3469	chr2:32374209-32378299+	exon sense-overlapping	ENSMUST00000048964	Ciz1	chr2:32363198-32378297+
chr2	39004847	39005491	MACS_peak_99598	3100	644	ENSMUST00000039535	Wdr38	3100	8.21	11.62	Ensembl	2699	chr2:38997476-39006168+	exon sense-overlapping	ENSMUST00000112872	Wdr38	chr2:38998319-39001582+
chr2	121449974	121451269	MACS_peak_105237	3100	1295	ENSMUST00000134412	Serf2	3100	17.63	11.62	Ensembl	3105	chr2:121449368-121453005+	exon sense-overlapping	ENSMUST00000099475	Serf2	chr2:121449383-121451054+
chr2	121456766	121457701	MACS_peak_105238	3100	935	ENSMUST00000125849	Hypk	3100	45.95	11.62	Ensembl	1349	chr2:121456693-121458436+	exon sense-overlapping	ENSMUST00000110612	Hypk	chr2:121453290-121458510+
chr2	122028807	122029328	MACS_peak_105372	3100	521	ENSMUST00000142747	Eif3j1	3100	29.16	11.62	Ensembl	594	chr2:122028652-122029328+	exon sense-overlapping	ENSMUST00000028668	Eif3j1	chr2:122028546-122056598+
chr2	130663347	130663819	MACS_peak_106044	3100	472	ENSMUST00000124559	Ddrgk1	3100	26.99	11.62	Ensembl	893	chr2:130655199-130663819-	exon sense-overlapping	ENSMUST00000089559	Ddrgk1	chr2:130653960-130664659-
chr2	154887190	154888360	MACS_peak_108346	3100	1170	ENSMUST00000135524	Eif2s2	3100	25.9	11.62	Ensembl	4102	chr2:154884378-154892808-	exon sense-overlapping	ENSMUST00000099173	Eif2s2	chr2:154871410-154892935-
chr2	173585519	173587072	MACS_peak_110491	3100	1553	ENSMUST00000153162	Ppp4r1l-ps	3100	21.49	11.62	Ensembl	4552	chr2:173584905-173659539-	bidirectional	ENSMUST00000029024	Rab22a	chr2:173659760-173707343+
chr3	104842321	104842689	MACS_peak_117795	3100	368	ENSMUST00000155476	Capza1	3100	51.64	11.62	Ensembl	489	chr3:104842322-104864373-	exon sense-overlapping	ENSMUST00000094028	Capza1	chr3:104822779-104864505-
chr3	124385509	124385998	MACS_peak_118883	3100	489	ENSMUST00000178993	Gm4617	3100	52.74	11.62	Ensembl	489	chr3:124385510-124385998+	intergenic	NA	NA	NA
chr3	157541699	157542060	MACS_peak_121099	3100	361	ENSMUST00000152882	Zranb2	3100	17.1	11.62	Ensembl	2490	chr3:157534425-157546923+	exon sense-overlapping	ENSMUST00000029831	Zranb2	chr3:157534359-157548336+
chr4	12232779	12233966	MACS_peak_121821	3100	1187	ENSMUST00000169135	Gm11847	3100	48.75	11.62	Ensembl	2593	chr4:12232780-12238024+	intergenic	NA	NA	NA
chr4	111790620	111791493	MACS_peak_128944	3100	873	ENSMUST00000120507	Gm12961	3100	125.85	11.62	Ensembl	1050	chr4:111790621-111791670-	intronic antisense	ENSMUST00000038868	Spata6	chr4:111719984-111829142+
chr4	111807357	111808423	MACS_peak_128945	3100	1066	ENSMUST00000120017	Gm12960	3100	111.04	11.62	Ensembl	1066	chr4:111807358-111808423-	intronic antisense	ENSMUST00000038868	Spata6	chr4:111719984-111829142+
chr4	119278933	119279397	MACS_peak_129419	3100	464	ENSMUST00000145976	Ybx1	3100	11.16	11.62	Ensembl	718	chr4:119278167-119279450-	exon sense-overlapping	ENSMUST00000079644	Ybx1	chr4:119277981-119294604-
chr4	127026142	127026614	MACS_peak_130386	3100	472	ENSMUST00000144630	Sfpq	3100	19.18	11.62	Ensembl	600	chr4:127025924-127026614+	exon sense-overlapping	ENSMUST00000030623	Sfpq	chr4:127021324-127031236+
chr4	129334496	129335249	MACS_peak_130828	3100	753	ENSMUST00000147183	Rbbp4	3100	15.17	11.62	Ensembl	4663	chr4:129324824-129335249-	exon sense-overlapping	ENSMUST00000102598	Rbbp4	chr4:129307100-129335370-
chr4	131899748	131901916	MACS_peak_131105	3100	2168	NR_102393	Gm12992	3100	13.54	11.62	RefSeq	4493	chr4:131899478-131920029-	natural antisense	ENSMUST00000030743	Srsf4	chr4:131885208-131901706+
chr4	133966428	133967908	MACS_peak_131441	3100	1480	ENSMUST00000145025	Hmgn2	3100	42.54	11.62	Ensembl	2159	chr4:133964991-133967908-	exon sense-overlapping	ENSMUST00000100472	Hmgn2	chr4:133965020-133967893-
chr5	74594874	74595211	MACS_peak_140105	3100	337	ENSMUST00000125129	Fip1l1	3100	14.31	11.62	Ensembl	547	chr5:74594743-74595916+	exon sense-overlapping	ENSMUST00000080164	Fip1l1	chr5:74535449-74598790+
chr5	145135064	145135391	MACS_peak_147541	3100	327	ENSMUST00000143439	Pdap1	3100	13.78	11.62	Ensembl	676	chr5:145131371-145135472-	exon sense-overlapping	ENSMUST00000031627	Pdap1	chr5:145128769-145140238-
chr6	30804783	30807552	MACS_peak_149805	3100	2769	uc009bfw.1	Mit1/Lb9	3100	25.61	11.62	UCSC_knowngene	2769	chr6:30804784-30807552+	intronic antisense	ENSMUST00000048774	Copg2	chr6:30747554-30896739-
chr6	37805974	37807091	MACS_peak_150667	3100	1117	ENSMUST00000116500	Gm15487	3100	245.6	11.62	Ensembl	1117	chr6:37805975-37807091+	intergenic	NA	NA	NA
chr6	83188610	83189268	MACS_peak_153658	3100	658	ENSMUST00000123313	Dctn1	3100	6.82	11.62	Ensembl	718	chr6:83188611-83189607+	exon sense-overlapping	ENSMUST00000077407	Dctn1	chr6:83165920-83200116+
chr6	89322457	89324843	MACS_peak_154405	3100	2386	ENSMUST00000181258	Gm26811	3100	12.16	11.62	Ensembl	5485	chr6:89304630-89327621+	natural antisense	ENSMUST00000049845	Plxna1	chr6:89319015-89357717-
chr6	125120005	125120385	MACS_peak_157641	3100	380	ENSMUST00000132794	Chd4	3100	19	11.62	Ensembl	821	chr6:125119767-125120865+	exon sense-overlapping	ENSMUST00000056889	Chd4	chr6:125095981-125130591+
chr7	45380716	45383184	MACS_peak_162152	3100	2468	NR_126539	Snrnp70	3100	30.03	11.62	RefSeq	4117	chr7:45376454-45395742-	exon sense-overlapping	ENSMUST00000074575	Snrnp70	chr7:45376462-45395692-
chr7	78899370	78899699	MACS_peak_165027	3100	329	ENSMUST00000172017	Aen	3100	56.92	11.62	Ensembl	393	chr7:78895951-78899699+	exon sense-overlapping	ENSMUST00000107421	Aen	chr7:78895934-78908374+
chr7	127978140	127978469	MACS_peak_169995	3100	329	uc009jxs.1	AK134717	3100	16.27	11.62	UCSC_knowngene	1514	chr7:127978141-127979654+	exon sense-overlapping	ENSMUST00000077609	Fus	chr7:127967490-127982032+
chr7	127981190	127981829	MACS_peak_169996	3100	639	ENSMUST00000172755	Fus	3100	74.04	11.62	Ensembl	670	chr7:127980216-127981829+	exon sense-overlapping	ENSMUST00000077609	Fus	chr7:127967490-127982032+
chr8	114205611	114205947	MACS_peak_180094	3100	336	ENSMUST00000142591	Vat1l	3100	35.73	11.62	Ensembl	456	chr8:114205612-114230325+	exon sense-overlapping	ENSMUST00000049509	Vat1l	chr8:114205630-114374071+
chr9	22321055	22321410	MACS_peak_183756	3100	355	ENSMUST00000178676	Gm10182	3100	11.78	11.62	Ensembl	1097	chr9:22320314-22321410-	intergenic	NA	NA	NA
chr9	59485978	59486618	MACS_peak_187642	3100	640	ENSMUST00000026264	Arih1	3100	29.25	11.62	Ensembl	2005	chr9:59393113-59486618-	exon sense-overlapping	ENSMUST00000165322	Arih1	chr9:59393294-59486347-
chr9	81677657	81678386	MACS_peak_189599	3100	729	ENSMUST00000183511	Gm9531	3100	15.43	11.62	Ensembl	775	chr9:81677612-81678386+	intergenic	NA	NA	NA
chr9	123689232	123690192	MACS_peak_193353	3100	960	ENSMUST00000168019	Gm10052	3100	13.39	11.62	Ensembl	960	chr9:123689233-123690192-	intronic antisense	ENSMUST00000163559	Ccr9	chr9:123678439-123781965+
chrX	74135132	74136059	MACS_peak_195496	3100	927	ENSMUST00000119643	Gm6758	3100	165.08	11.62	Ensembl	1055	chrX:74135133-74136187-	exon sense-overlapping	ENSMUST00000170481	Mecp2	chrX:74026828-74135363-
chrX	74314863	74315572	MACS_peak_195519	3100	709	ENSMUST00000138242	Fam50a	3100	21.82	11.62	Ensembl	1918	chrX:74313126-74320134+	exon sense-overlapping	ENSMUST00000114160	Fam50a	chrX:74313033-74320149+
chrX	80456736	80458551	MACS_peak_195703	3100	1815	ENSMUST00000088183	Gm5940	3100	425.23	11.62	Ensembl	1815	chrX:80456737-80458551+	intergenic	NA	NA	NA
chrX	88759470	88760312	MACS_peak_196069	3100	842	ENSMUST00000182943	Gm27000	3100	16.94	11.62	Ensembl	842	chrX:88759471-88760312-	intergenic	NA	NA	NA
chrX	105851036	105851459	MACS_peak_196877	3100	423	ENSMUST00000146193	Atrx	3100	9.65	11.62	Ensembl	689	chrX:105846737-105851524-	exon sense-overlapping	ENSMUST00000113573	Atrx	chrX:105797615-105929397-
chr1	178336046	178336405	MACS_peak_8995	3100	359	ENSMUST00000134291	Hnrnpu	3100	14.42	13.56	Ensembl	673	chr1:178335642-178336405-	exon sense-overlapping	ENSMUST00000037748	Hnrnpu	chr1:178328105-178337797-
chr12	80944736	80945399	MACS_peak_31193	3100	663	NR_045057	Gm20337	3100	14.66	13.56	RefSeq	1142	chr12:80942652-80945399-	bidirectional	ENSMUST00000094693	Srsf5	chr12:80945504-80950507+
chr4	103563335	103565228	MACS_peak_97007	3100	1893	ENSMUST00000079345	Gm12715	3100	14.52	13.56	Ensembl	1893	chr4:103563336-103565228+	intergenic	NA	NA	NA
chr1	24613970	24614812	MACS_peak_1208	3100	842	uc007ams.1	Atpase6	3100	5.9	12.9	UCSC_knowngene	842	chr1:24613971-24614812-	intergenic	NA	NA	NA
chr13	83524855	83525279	MACS_peak_42775	3100	424	uc007rig.1	AK043267	3100	13.32	12.9	UCSC_knowngene	2484	chr13:83524856-83527339+	intron sense-overlapping	ENSMUST00000005722	Mef2c	chr13:83504034-83667079+
chr18	82339132	82339816	MACS_peak_78052	3100	684	ENSMUST00000078739	Gm17383	3100	115.92	12.9	Ensembl	1041	chr18:82338774-82339816+	intergenic	NA	NA	NA
chr4	69925200	69926171	MACS_peak_107683	3100	971	ENSMUST00000056452	Gm11223	3100	10.93	12.9	Ensembl	971	chr4:69925201-69926171-	intergenic	NA	NA	NA
chr8	121590476	121591059	MACS_peak_138554	3013.12	583	ENSMUST00000181826	Map1lc3b	3013.12	21.92	13.45	Ensembl	2633	chr8:121590477-121593109+	exon sense-overlapping	ENSMUST00000034270	Map1lc3b	chr8:121590361-121598760+
chr2	167617633	167617977	MACS_peak_110061	2970.78	344	ENSMUST00000144830	Ube2v1	2970.78	16.51	11.67	Ensembl	433	chr2:167617588-167631982-	exon sense-overlapping	ENSMUST00000060645	Ube2v1	chr2:167607844-167631972-
chr14	25649173	25649574	MACS_peak_54034	2970.56	401	ENSMUST00000159766	Zmiz1	2970.56	17.65	11.66	Ensembl	4314	chr14:25459292-25649574+	exon sense-overlapping	ENSMUST00000007961	Zmiz1	chr14:25459267-25664719+
chr16	18245004	18245358	MACS_peak_70690	2963.24	354	ENSMUST00000123073	Ranbp1	2963.24	7.41	11.64	Ensembl	626	chr16:18244969-18248646-	exon sense-overlapping	ENSMUST00000052325	Ranbp1	chr16:18239802-18248067-
chr16	3926427	3926740	MACS_peak_68686	2830.99	313	ENSMUST00000121410	Gm15538	2830.99	52.99	11.51	Ensembl	313	chr16:3926428-3926740+	intron sense-overlapping	ENSMUST00000040881	Cluap1	chr16:3908825-3941147+
chr11	102877416	102877718	MACS_peak_28200	2797.9	302	ENSMUST00000148209	Eftud2	2797.9	17.28	13.35	Ensembl	796	chr11:102876964-102880935-	exon sense-overlapping	ENSMUST00000021306	Eftud2	chr11:102838473-102880967-
chr5	100415772	100416166	MACS_peak_141578	2790.69	394	ENSMUST00000182144	Sec31a	2790.69	18.31	11.44	Ensembl	756	chr5:100415411-100416166-	exon sense-overlapping	ENSMUST00000094578	Sec31a	chr5:100361649-100416234-
chr2	109896235	109896738	MACS_peak_104211	2769.26	503	ENSMUST00000151163	Lin7c	2769.26	12.54	11.35	Ensembl	746	chr2:109890870-109896738+	exon sense-overlapping	ENSMUST00000028583	Lin7c	chr2:109890853-109901003+
chr1	171711076	171711396	MACS_peak_9749	2766.3	320	ENSMUST00000177707	Tma7-ps	2766.3	17	13.34	Ensembl	424	chr1:171711077-171711500+	intergenic	NA	NA	NA
chr11	94297758	94298098	MACS_peak_24131	2758.77	340	ENSMUST00000171033	Luc7l3	2758.77	7.27	13.5	Ensembl	621	chr11:94297007-94298218-	exon sense-overlapping	ENSMUST00000021226	Luc7l3	chr11:94291139-94321988-
chr1	171344287	171345482	MACS_peak_11462	2738.17	1195	ENSMUST00000146428	Nit1	2738.17	43.61	11.24	Ensembl	2196	chr1:171338008-171345482-	exon sense-overlapping	ENSMUST00000111289	Nit1	chr1:171340571-171345646-
chr11	72447552	72447882	MACS_peak_29049	2668.43	330	ENSMUST00000152894	Mybbp1a	2668.43	17.98	11.26	Ensembl	4448	chr11:72441355-72451768+	exon sense-overlapping	ENSMUST00000045633	Mybbp1a	chr11:72441355-72451768+
chr17	17830892	17832066	MACS_peak_67204	2628.18	1174	ENSMUST00000178408	4930546H06Rik	2628.18	27.03	13.38	Ensembl	1174	chr17:17830893-17832066+	exon sense-overlapping	ENSMUST00000150302	4930546H06Rik	chr17:17831444-17837723+
chr7	61535075	61535488	MACS_peak_163631	2525.34	413	NR_045727	B230209E15Rik	2525.34	10.54	11.19	RefSeq	2058	chr7:61529410-61615327-	intergenic	NA	NA	NA
chr10	93879539	93880138	MACS_peak_20877	2516.62	599	ENSMUST00000181104	Metap2	2516.62	20.93	11.4	Ensembl	931	chr10:93879540-93889761-	exon sense-overlapping	ENSMUST00000047910	Metap2	chr10:93858489-93889814-
chr4	133011564	133011958	MACS_peak_131274	2451.3	394	ENSMUST00000145682	Ahdc1	2451.3	25.72	11.34	Ensembl	560	chr4:133011565-133055083+	exon sense-overlapping	ENSMUST00000044521	Ahdc1	chr4:133012204-133077645+
chr4	126167469	126168449	MACS_peak_130250	2398.09	980	ENSMUST00000140390	Thrap3	2398.09	12	11.25	Ensembl	2656	chr4:126164086-126168449-	exon sense-overlapping	ENSMUST00000080919	Thrap3	chr4:126164082-126202760-
chrX	68712072	68712413	MACS_peak_195180	2333.71	341	ENSMUST00000127993	Fmr1	2333.71	11.01	11.16	Ensembl	646	chrX:68711851-68713323+	exon sense-overlapping	ENSMUST00000088546	Fmr1	chrX:68678541-68717963+
chr2	45107627	45110157	MACS_peak_99936	2296.87	2530	ENSMUST00000123037	Zeb2	2296.87	39.18	11.1	Ensembl	3852	chr2:45106485-45113001-	exon sense-overlapping	ENSMUST00000028229	Zeb2	chr2:44987121-45110464-
chr7	122969820	122970459	MACS_peak_145797	2235.5	639	NR_045614	4930413G21Rik	2235.5	19.83	12.73	RefSeq	1402	chr7:122969058-122970459-	natural antisense	ENSMUST00000148880	Rbbp6	chr7:122965686-122976008+
chr8	93950301	93950675	MACS_peak_178717	2204.37	374	ENSMUST00000130974	Gnao1	2204.37	10.3	11.33	Ensembl	402	chr8:93949505-93950675+	exon sense-overlapping	ENSMUST00000034198	Gnao1	chr8:93810838-93969388+
chr5	29750738	29751047	MACS_peak_136621	2151.06	309	ENSMUST00000151976	Dnajb6	2151.06	7	11.34	Ensembl	668	chr5:29750722-29752738+	exon sense-overlapping	ENSMUST00000008733	Dnajb6	chr5:29735688-29786478+
chr14	55071861	55074010	MACS_peak_48447	2111.23	2149	uc007txy.2	Thtpa	2111.23	14.82	13.04	UCSC_knowngene	4251	chr14:55055493-55098995+	exon sense-overlapping	ENSMUST00000050575	Thtpa	chr14:55094835-55098986+
chr19	5388335	5389043	MACS_peak_91453	2063.63	708	NR_033224	D330050I16Rik	2063.63	21.75	11.45	RefSeq	1734	chr19:5388336-5390069+	natural antisense	ENSMUST00000044207	Sart1	chr19:5377523-5388703-
chr3	96579797	96580155	MACS_peak_117089	2041.07	358	ENSMUST00000141579	Polr3gl	2041.07	20.51	11.5	Ensembl	545	chr3:96578402-96580155-	exon sense-overlapping	ENSMUST00000091924	Polr3gl	chr3:96577872-96594181-
chr5	138504711	138505951	MACS_peak_112137	1998.65	1240	ENSMUST00000034916	Gm5564	1998.65	53.92	12.41	Ensembl	1240	chr5:138504712-138505951+	intergenic	NA	NA	NA
chrX	8143847	8144679	MACS_peak_193596	1983.74	832	ENSMUST00000141925	Rbm3	1983.74	12.8	11.39	Ensembl	1274	chrX:8142890-8145722-	exon sense-overlapping	ENSMUST00000040010	Rbm3	chrX:8138978-8145697-
chr1	95498583	95499187	MACS_peak_4993	1980.73	604	ENSMUST00000109141	Gm15427	1980.73	6.65	12.27	Ensembl	604	chr1:95498584-95499187+	intergenic	NA	NA	NA
chr9	83146423	83146796	MACS_peak_189657	1944.88	373	uc009qwf.1	AK018214	1944.88	18.84	11.36	UCSC_knowngene	1129	chr9:83146002-83147281+	natural antisense	ENSMUST00000161796	Hmgn3	chr9:83109948-83146607-
chr7	16280857	16281166	MACS_peak_137508	1897.74	309	ENSMUST00000129447	Ccdc9	1897.74	21.92	13.52	Ensembl	748	chr7:16276594-16281166-	exon sense-overlapping	ENSMUST00000041010	Ccdc9	chr7:16275464-16285059-
chr1	9574547	9575649	MACS_peak_417	1892.96	1102	ENSMUST00000121942	Gm6161	1892.96	39.11	11.53	Ensembl	1102	chr1:9574548-9575649+	intron sense-overlapping	ENSMUST00000144177	Adhfe1	chr1:9547948-9577970+
chr2	59920294	59920707	MACS_peak_100829	1884.96	413	ENSMUST00000152639	Baz2b	1884.96	16.65	11.5	Ensembl	2539	chr2:59914180-59923932-	exon sense-overlapping	ENSMUST00000090925	Baz2b	chr2:59899445-60006187-
chr7	45006305	45009437	MACS_peak_139478	1852.79	3132	ENSMUST00000148227	Scaf1	1852.79	10.52	13.3	Ensembl	6459	chr7:45002948-45013973-	exon sense-overlapping	ENSMUST00000085383	Scaf1	chr7:45002948-45016363-
chr9	106890812	106891198	MACS_peak_146434	1776.98	386	ENSMUST00000162801	Manf	1776.98	10.1	11.68	Ensembl	741	chr9:106890562-106891917-	exon sense-overlapping	ENSMUST00000069036	Manf	chr9:106888762-106891415-
chr15	98658030	98658435	MACS_peak_68041	1772.21	405	ENSMUST00000159170	Ddx23	1772.21	10	11.46	Ensembl	610	chr15:98657893-98662889-	exon sense-overlapping	ENSMUST00000003450	Ddx23	chr15:98645134-98662889-
chr7	119739925	119740355	MACS_peak_145481	1754.86	430	ENSMUST00000004569	Gm5601	1754.86	23.64	13.02	Ensembl	1437	chr7:119739926-119742226+	intergenic	NA	NA	NA
chr17	46161716	46162158	MACS_peak_80632	1719.64	442	ENSMUST00000165686	Gtpbp2	1719.64	34.42	11.56	Ensembl	608	chr17:46161161-46162158+	exon sense-overlapping	ENSMUST00000024748	Gtpbp2	chr17:46161032-46169370+
chr13	54765225	54765692	MACS_peak_36850	1718.67	467	ENSMUST00000138067	Sncb	1718.67	6.1	11.29	Ensembl	822	chr13:54765059-54766492-	exon sense-overlapping	ENSMUST00000036825	Sncb	chr13:54758860-54766595-
chr10	42762319	42762986	MACS_peak_13875	1696.12	667	ENSMUST00000181674	Gm26860	1696.12	39.58	13.06	Ensembl	1489	chr10:42761596-42763635-	natural antisense	ENSMUST00000019937	Sec63	chr10:42761496-42832514+
chr14	122121644	122122643	MACS_peak_60691	1659.63	999	ENSMUST00000166043	Gm17082	1659.63	26.46	11.68	Ensembl	1091	chr14:122121553-122122643+	intron sense-overlapping	ENSMUST00000026624	Tm9sf2	chr14:122107038-122159604+
chr9	107767307	107767708	MACS_peak_146566	1651.72	401	ENSMUST00000182518	Rbm5	1651.72	6.63	11.34	Ensembl	1272	chr9:107766605-107770986-	exon sense-overlapping	ENSMUST00000035199	Rbm5	chr9:107740500-107770987-
chr11	96822408	96822725	MACS_peak_31813	1650.76	317	ENSMUST00000134951	Nfe2l1	1650.76	16.68	11.71	Ensembl	597	chr11:96821346-96822725-	exon sense-overlapping	ENSMUST00000081775	Nfe2l1	chr11:96817414-96829968-
chr11	97833352	97833702	MACS_peak_32008	1598.7	350	ENSMUST00000127575	Lasp1	1598.7	11.24	11.66	Ensembl	758	chr11:97833183-97836205+	exon sense-overlapping	ENSMUST00000043843	Lasp1	chr11:97799565-97838764+
chr4	83464406	83465491	MACS_peak_126578	1575.56	1085	uc008tky.1	AK048571	1575.56	7.1	11.69	UCSC_knowngene	2266	chr4:83463925-83467021+	natural antisense	ENSMUST00000030207	Psip1	chr4:83455680-83486459-
chr7	28395424	28395872	MACS_peak_160941	1554.96	448	ENSMUST00000152512	Paf1	1554.96	15.83	11.71	Ensembl	576	chr7:28395425-28396079+	exon sense-overlapping	ENSMUST00000003529	Paf1	chr7:28392951-28399388+
chr5	24696901	24697409	MACS_peak_136048	1546.06	508	ENSMUST00000181925	Gm26648	1546.06	10.23	11.8	Ensembl	5831	chr5:24696902-24704690-	natural antisense	ENSMUST00000068825	Nub1	chr5:24685815-24710555+
chr15	92138850	92139317	MACS_peak_67437	1538.92	467	uc007xih.1	Cntn1	1538.92	37.79	11.83	UCSC_knowngene	1627	chr15:91949540-92139465+	exon sense-overlapping	ENSMUST00000000109	Cntn1	chr15:92128188-92341953+
chr9	112235102	112235935	MACS_peak_165611	1498.69	833	NR_015468	2900079G21Rik	1498.69	13.59	14.51	RefSeq	1163	chr9:112234381-112236018+	natural antisense	ENSMUST00000159055	Arpp21	chr9:112155476-112235018-
chr4	146564452	146565069	MACS_peak_132905	1492.73	617	ENSMUST00000122151	Gm13237	1492.73	9.76	11.86	Ensembl	635	chr4:146564453-146565087-	intergenic	NA	NA	NA
chr9	75071014	75071659	MACS_peak_163103	1459.84	645	ENSMUST00000149823	Myo5a	1459.84	15.43	14.95	Ensembl	1768	chr9:75071015-75117308+	exon sense-overlapping	ENSMUST00000123128	Myo5a	chr9:75071188-75223688+
chr12	101082450	101084108	MACS_peak_32776	1455.08	1658	NR_038050	D130020L05Rik	1455.08	8.32	12.02	RefSeq	2935	chr12:101082451-101088927+	natural antisense	ENSMUST00000048305	Smek1	chr12:101039409-101083702-
chr11	55409520	55409997	MACS_peak_23517	1435.14	477	ENSMUST00000125787	Sparc	1435.14	18.15	14.88	Ensembl	907	chr11:55409204-55419900-	exon sense-overlapping	ENSMUST00000018737	Sparc	chr11:55394500-55420080-
chr12	81532364	81532877	MACS_peak_40688	1426.54	513	ENSMUST00000168961	Gm20498	1426.54	18.29	11.77	Ensembl	714	chr12:81474617-81532877-	exon sense-overlapping	ENSMUST00000002757	Cox16	chr12:81470704-81485120-
chr17	32284786	32285337	MACS_peak_79852	1426.24	551	ENSMUST00000181112	Gm26549	1426.24	12.85	11.81	Ensembl	1209	chr17:32284787-32298689+	bidirectional	ENSMUST00000003726	Brd4	chr17:32196276-32284097-
chr12	85219821	85220245	MACS_peak_41320	1393.18	424	ENSMUST00000128709	Eif2b2	1393.18	16.37	11.79	Ensembl	935	chr12:85219582-85223488+	exon sense-overlapping	ENSMUST00000004910	Eif2b2	chr12:85219481-85226628+
chr14	54643940	54644536	MACS_peak_56463	1387.45	596	ENSMUST00000152773	Acin1	1387.45	9.47	11.77	Ensembl	844	chr14:54642902-54644536-	exon sense-overlapping	ENSMUST00000022793	Acin1	chr14:54642161-54686931-
chr14	48079287	48079806	MACS_peak_56112	1361.61	519	ENSMUST00000075768	Gm6055	1361.61	12.94	11.76	Ensembl	671	chr14:48079136-48079806-	intergenic	NA	NA	NA
chr4	155657854	155658339	MACS_peak_134211	1324.78	485	ENSMUST00000130237	Mib2	1324.78	20.33	11.86	Ensembl	622	chr4:155657624-155658339-	exon sense-overlapping	ENSMUST00000103176	Mib2	chr4:155654682-155669198-
chr11	30110725	30111359	MACS_peak_25156	1304.26	634	ENSMUST00000127209	Sptbn1	1304.26	6.66	11.81	Ensembl	744	chr11:30109871-30111359-	exon sense-overlapping	ENSMUST00000006629	Sptbn1	chr11:30099395-30268169-
chr8	52196213	52197160	MACS_peak_175450	1269.07	947	ENSMUST00000064897	Gm9892	1269.07	21.08	12.02	Ensembl	1381	chr8:52195780-52197160-	intergenic	NA	NA	NA
chr19	5843174	5845480	MACS_peak_78741	1241.45	2306	NR_003513	Neat1	1241.45	28	15.84	RefSeq	3190	chr19:5842296-5845480-	intergenic	NA	NA	NA
chr11	52004264	52005092	MACS_peak_26981	1228.74	828	ENSMUST00000143228	Cdkl3	1228.74	24.33	12.02	Ensembl	2769	chr11:52004265-52057563+	exon sense-overlapping	ENSMUST00000063303	Cdkl3	chr11:52004221-52038165+
chr6	83119044	83120044	MACS_peak_153636	1210.97	1000	ENSMUST00000151393	Wbp1	1210.97	31.69	12.03	Ensembl	2046	chr6:83119045-83121559-	exon sense-overlapping	ENSMUST00000032111	Wbp1	chr6:83119044-83121559-
chr3	28630259	28630615	MACS_peak_85980	1198.17	356	ENSMUST00000162225	Tnik	1198.17	10.52	13.81	Ensembl	826	chr3:28629872-28638469+	exon sense-overlapping	ENSMUST00000159236	Tnik	chr3:28263215-28675858+
chrX	94615799	94616125	MACS_peak_196178	1193.92	326	ENSMUST00000117321	Gm9009	1193.92	42.21	12.18	Ensembl	326	chrX:94615800-94616125+	intergenic	NA	NA	NA
chr5	110106652	110107202	MACS_peak_108635	1182.37	550	ENSMUST00000127628	Gtpbp6	1182.37	17.19	13.91	Ensembl	1481	chr5:110103979-110107202-	exon sense-overlapping	ENSMUST00000077220	Gtpbp6	chr5:110103975-110108197-
chr15	102519121	102519720	MACS_peak_58878	1171.74	599	ENSMUST00000154451	Tarbp2	1171.74	33.72	16.42	Ensembl	704	chr15:102518498-102519720+	exon sense-overlapping	ENSMUST00000023813	Tarbp2	chr15:102518459-102523676+
chr19	6907241	6908116	MACS_peak_91691	1164.06	875	ENSMUST00000145300	Prdx5	1164.06	11.79	12.22	Ensembl	1826	chr19:6906697-6909978-	exon sense-overlapping	ENSMUST00000025904	Prdx5	chr19:6906706-6910106-
chr17	56568894	56569278	MACS_peak_81545	1144.73	384	ENSMUST00000127947	Safb2	1144.73	13.75	12.23	Ensembl	632	chr17:56567533-56569434-	exon sense-overlapping	ENSMUST00000075510	Safb2	chr17:56562939-56584585-
chrX	142298106	142298458	MACS_peak_169997	1143.5	352	NR_002883	Gm5643	1143.5	24.77	16.38	RefSeq	1733	chrX:142297505-142299237+	intergenic	NA	NA	NA
chr17	34902172	34902624	MACS_peak_68946	1134.75	452	ENSMUST00000146418	Ehmt2	1134.75	12.88	16.49	Ensembl	675	chr17:34899694-34902624+	exon sense-overlapping	ENSMUST00000013931	Ehmt2	chr17:34898971-34914051+
chr7	57792127	57792629	MACS_peak_163248	1132.41	502	ENSMUST00000136033	Gabrb3	1132.41	17.84	12.27	Ensembl	696	chr7:57792128-57816315+	exon sense-overlapping	ENSMUST00000039697	Gabrb3	chr7:57591162-57828802+
chr11	69341158	69341955	MACS_peak_28738	1121.09	797	NR_027827	Chd3os	1121.09	17.73	12.38	RefSeq	1779	chr11:69340769-69342647+	intergenic	NA	NA	NA
chr17	33759991	33760478	MACS_peak_68813	1115.91	487	uc008bzo.1	AK133808	1115.91	11.97	16.61	UCSC_knowngene	925	chr17:33759992-33761870+	natural antisense	ENSMUST00000057373	Rab11b	chr17:33742484-33760530-
chr3	41070279	41070618	MACS_peak_113811	1103.78	339	ENSMUST00000124636	Pgrmc2	1103.78	17.23	12.56	Ensembl	596	chr3:41068520-41070670-	exon sense-overlapping	ENSMUST00000058578	Pgrmc2	chr3:41066326-41083046-
chr4	70534227	70534995	MACS_peak_107745	1096.68	768	ENSMUST00000037881	Megf9	1096.68	7.12	16.92	Ensembl	1205	chr4:70461826-70534995-	exon sense-overlapping	ENSMUST00000107359	Megf9	chr4:70427065-70534928-
chr4	148038145	148038462	MACS_peak_133016	1086.17	317	ENSMUST00000131232	Clcn6	1086.17	26.99	12.52	Ensembl	627	chr4:148026582-148038562-	exon sense-overlapping	ENSMUST00000030879	Clcn6	chr4:148006134-148038813-
chr10	63022776	63023838	MACS_peak_17635	1076.9	1062	uc007fjq.3	AK156477	1076.9	26.16	12.5	UCSC_knowngene	1294	chr10:63022545-63023838-	exon sense-overlapping	ENSMUST00000020263	Hnrnph3	chr10:63014664-63023894-
chr8	4520648	4522558	MACS_peak_147745	1051.81	1910	ENSMUST00000176932	Cers4	1051.81	23.95	17.32	Ensembl	3674	chr8:4493482-4522558+	exon sense-overlapping	ENSMUST00000008350	Cers4	chr8:4493199-4524057+
chr16	49759153	49759643	MACS_peak_73766	1026.56	490	ENSMUST00000127115	Gm15518	1026.56	14.68	12.72	Ensembl	2108	chr16:49758576-49798870-	natural antisense	ENSMUST00000046777	Ift57	chr16:49699233-49765126+
chr18	80192302	80193499	MACS_peak_90640	1019.05	1197	NR_131039	LOC105246506	1019.05	13.52	12.72	RefSeq	2708	chr18:80186239-80193569+	natural antisense	ENSMUST00000025462	Rbfa	chr18:80192265-80200658-
chr6	91157163	91157545	MACS_peak_154643	1018.66	382	ENSMUST00000127768	Hdac11	1018.66	30.44	12.75	Ensembl	688	chr6:91157164-91167848+	exon sense-overlapping	ENSMUST00000041736	Hdac11	chr6:91156665-91174692+
chr4	117285190	117285511	MACS_peak_110609	1013.7	321	ENSMUST00000154974	Rnf220	1013.7	14.9	17.7	Ensembl	1492	chr4:117285092-117289442-	exon sense-overlapping	ENSMUST00000030439	Rnf220	chr4:117271463-117497052-
chr8	85554200	85554504	MACS_peak_178071	1001.75	304	uc009mqb.1	AK163592	1001.75	9.22	12.76	UCSC_knowngene	1168	chr8:85554201-85555368-	exon sense-overlapping	ENSMUST00000034138	Dnaja2	chr8:85537640-85555271-
chr16	18248678	18250033	MACS_peak_60842	996.47	1355	ENSMUST00000127239	Trmt2a	996.47	21.35	17.71	Ensembl	2805	chr16:18248679-18253502+	exon sense-overlapping	ENSMUST00000100099	Trmt2a	chr16:18249062-18253502+
chr7	30292154	30292673	MACS_peak_138716	996.2	519	ENSMUST00000145253	Clip3	996.2	9.01	17.7	Ensembl	634	chr7:30291728-30292673+	exon sense-overlapping	ENSMUST00000014065	Clip3	chr7:30291672-30308367+
chr17	32312285	32313262	MACS_peak_79861	993.35	977	NR_131218	Akap8	993.35	16.07	12.8	RefSeq	4690	chr17:32303672-32321238-	exon sense-overlapping	ENSMUST00000002699	Akap8	chr17:32303676-32321153-
chr12	3835026	3835459	MACS_peak_35368	990.78	433	ENSMUST00000173700	Dnmt3a	990.78	7.46	12.81	Ensembl	4014	chr12:3806007-3838814+	exon sense-overlapping	ENSMUST00000020991	Dnmt3a	chr12:3807030-3914443+
chr5	37122974	37123342	MACS_peak_137702	987.21	368	ENSMUST00000126527	Jakmip1	987.21	22.39	12.82	Ensembl	516	chr5:37122975-37125024+	exon sense-overlapping	ENSMUST00000043794	Jakmip1	chr5:37050857-37125299+
chr5	99966021	99966382	MACS_peak_141512	986.69	361	ENSMUST00000170654	Hnrnpd	986.69	5.6	12.82	Ensembl	425	chr5:99964743-99966387-	exon sense-overlapping	ENSMUST00000019128	Hnrnpd	chr5:99960598-99978937-
chrX	80533891	80534641	MACS_peak_168501	981.42	750	ENSMUST00000120076	Gm8806	981.42	22.17	17.66	Ensembl	1407	chrX:80533745-80535151-	intergenic	NA	NA	NA
chr10	80126032	80126509	MACS_peak_14434	970.27	477	ENSMUST00000129235	Stk11	970.27	10.94	15.68	Ensembl	671	chr10:80125375-80126509+	exon sense-overlapping	ENSMUST00000003152	Stk11	chr10:80115803-80130682+
chr4	132551294	132551610	MACS_peak_99776	953.88	316	ENSMUST00000105937	Dnajc8	953.88	10.85	15.82	Ensembl	743	chr4:132551295-132553443+	exon sense-overlapping	ENSMUST00000094657	Dnajc8	chr4:132535550-132553742+
chr12	61523149	61524830	MACS_peak_39024	948.45	1681	ENSMUST00000130887	Lrfn5	948.45	9.78	12.79	Ensembl	1724	chr12:61523150-61605008+	exon sense-overlapping	ENSMUST00000055815	Lrfn5	chr12:61523948-61845258+
chr4	21847763	21848448	MACS_peak_122279	942.27	685	NR_028384	4930528A17Rik	942.27	20.27	12.82	RefSeq	2122	chr4:21846327-21848448-	natural antisense	ENSMUST00000029911	Sfrs18	chr4:21847583-21876475+
chr15	83117365	83117747	MACS_peak_56872	941.41	382	ENSMUST00000167589	Rrp7a	941.41	6.94	17.6	Ensembl	792	chr15:83117226-83118346-	exon sense-overlapping	ENSMUST00000018184	Rrp7a	chr15:83113433-83122801-
chr8	105637065	105637547	MACS_peak_179296	929.35	482	ENSMUST00000129388	Ctcf	929.35	12.33	12.82	Ensembl	729	chr8:105637066-105663851+	exon sense-overlapping	ENSMUST00000005841	Ctcf	chr8:105636579-105682922+
chr6	47577543	47577918	MACS_peak_115729	923.33	375	ENSMUST00000170327	Ezh2	923.33	11.16	15.94	Ensembl	837	chr6:47556027-47578010-	exon sense-overlapping	ENSMUST00000081721	Ezh2	chr6:47530274-47595030-
chr5	109933562	109934015	MACS_peak_142405	909.09	453	NR_040366	Gm15446	909.09	13.97	13.07	RefSeq	1551	chr5:109933563-109941710+	exon sense-overlapping	ENSMUST00000112544	Gm15446	chr5:109923400-109943936+
chr17	27840463	27840834	MACS_peak_60478	902.02	371	ENSMUST00000137581	Snrpc	902.02	10.46	16.61	Ensembl	6057	chr17:27840134-27851968+	exon sense-overlapping	ENSMUST00000071006	Snrpc	chr17:27839974-27851964+
chr11	74901712	74902166	MACS_peak_29292	900.01	454	ENSMUST00000144019	Tsr1	900.01	10.6	13.19	Ensembl	540	chr11:74901713-74903905+	exon sense-overlapping	ENSMUST00000045807	Tsr1	chr11:74898078-74909342+
chr5	132541514	132543344	MACS_peak_145948	895.7	1830	ENSMUST00000161226	Auts2	895.7	16.54	13.17	Ensembl	7409	chr5:131437333-132543344-	exon sense-overlapping	ENSMUST00000160135	Auts2	chr5:132030990-132449360-
chr7	73558038	73558395	MACS_peak_141602	893.12	357	NR_037569	1810026B05Rik	893.12	11.8	17.67	RefSeq	5157	chr7:73539798-73558395-	exon sense-overlapping	ENSMUST00000169922	Chd2	chr7:73426691-73541746-
chr4	109403222	109403993	MACS_peak_110266	891.43	771	NR_131195	Gm12750	891.43	42.64	17.69	RefSeq	2532	chr4:109402279-109406257-	bidirectional	ENSMUST00000064129	Ttc39a	chr4:109407087-109444745+
chr4	125504287	125504839	MACS_peak_130137	889.61	552	ENSMUST00000118517	Ftl2	889.61	19.3	13.16	Ensembl	552	chr4:125504288-125504839+	intron sense-overlapping	ENSMUST00000030676	Grik3	chr4:125490700-125714173+
chr19	12775994	12776462	MACS_peak_92168	883.65	468	ENSMUST00000137256	Zfp91	883.65	12.45	13.36	Ensembl	4426	chr19:12771511-12790309-	exon sense-overlapping	ENSMUST00000038627	Zfp91	chr19:12767020-12796126-
chr4	151957102	151957495	MACS_peak_114749	868.64	393	ENSMUST00000133959	Dnajc11	868.64	20.3	17.63	Ensembl	688	chr4:151933734-151957495+	exon sense-overlapping	ENSMUST00000062904	Dnajc11	chr4:151933691-151982137+
chr11	43745017	43745447	MACS_peak_22618	866.16	430	ENSMUST00000147984	Ttc1	866.16	14.67	17.74	Ensembl	501	chr11:43745018-43747992-	exon sense-overlapping	ENSMUST00000048578	Ttc1	chr11:43730009-43747982-
chr16	3984990	3987181	MACS_peak_68702	861.75	2191	uc012aap.2	Slx4	861.75	16.79	13.38	UCSC_knowngene	4224	chr16:3979106-3989119-	exon sense-overlapping	ENSMUST00000040790	Slx4	chr16:3979123-4001680-
chr15	77765503	77765828	MACS_peak_56103	848.01	325	ENSMUST00000139729	Myh9	848.01	9.25	17.99	Ensembl	723	chr15:77765328-77767190-	exon sense-overlapping	ENSMUST00000016771	Myh9	chr15:77760587-77842175-
chr8	72138395	72138737	MACS_peak_176827	845.2	342	ENSMUST00000181918	Gm26586	845.2	12.19	13.31	Ensembl	1745	chr8:72137389-72140820-	natural antisense	ENSMUST00000003575	Tpm4	chr8:72135259-72153142+
chr11	115534378	115534683	MACS_peak_29518	844.25	305	ENSMUST00000050672	Sumo2	844.25	12.85	17.96	Ensembl	397	chr11:115534379-115536189-	exon sense-overlapping	ENSMUST00000117589	Sumo2	chr11:115523102-115535817-
chr7	35642614	35643044	MACS_peak_161561	841.83	430	ENSMUST00000151336	Pdcd5	841.83	14.67	13.31	Ensembl	602	chr7:35642014-35643044-	exon sense-overlapping	ENSMUST00000118501	Pdcd5	chr7:35641982-35647521-
chr6	39871531	39871971	MACS_peak_129885	837.97	440	ENSMUST00000180899	Gm26833	837.97	9.46	18	Ensembl	440	chr6:39871532-39871971-	intergenic	NA	NA	NA
chr19	44069271	44069744	MACS_peak_81157	837.95	473	ENSMUST00000170577	Erlin1	837.95	12.01	18	Ensembl	2083	chr19:44066072-44069744-	exon sense-overlapping	ENSMUST00000071698	Erlin1	chr19:44034944-44069775-
chr14	69703755	69704126	MACS_peak_57841	830.21	371	ENSMUST00000128747	R3hcc1	830.21	18.43	13.24	Ensembl	829	chr14:69703478-69705313-	exon sense-overlapping	ENSMUST00000118374	R3hcc1	chr14:69697307-69707584-
chr4	141464236	141464702	MACS_peak_113663	827.24	466	ENSMUST00000142020	Zbtb17	827.24	15.24	18.17	Ensembl	2973	chr4:141444699-141467225+	exon sense-overlapping	ENSMUST00000006377	Zbtb17	chr4:141444654-141467225+
chr11	6397506	6397848	MACS_peak_18163	826.55	342	ENSMUST00000124588	Zmiz2	826.55	5.67	17.5	Ensembl	723	chr11:6396729-6397848+	exon sense-overlapping	ENSMUST00000012612	Zmiz2	chr11:6389364-6406158+
chr11	75598179	75598548	MACS_peak_29429	817.71	369	ENSMUST00000140841	Pitpna	817.71	6.81	13.16	Ensembl	594	chr11:75588159-75598548+	exon sense-overlapping	ENSMUST00000143219	Pitpna	chr11:75588097-75628804+
chr2	32629520	32629884	MACS_peak_98734	812.6	364	ENSMUST00000135392	Ak1	812.6	7.37	13.25	Ensembl	752	chr2:32629521-32633400+	exon sense-overlapping	ENSMUST00000068271	Ak1	chr2:32629504-32635052+
chr11	98753289	98753777	MACS_peak_32125	805.83	488	ENSMUST00000150693	Thra	805.83	10.3	13.28	Ensembl	654	chr11:98744233-98753777+	exon sense-overlapping	ENSMUST00000064187	Thra	chr11:98741811-98769006+
chr16	64852701	64853025	MACS_peak_56779	803.19	324	ENSMUST00000136532	Cggbp1	803.19	10.06	17.97	Ensembl	760	chr16:64852702-64855986+	exon sense-overlapping	ENSMUST00000067744	Cggbp1	chr16:64851996-64859507+
chr5	3803183	3804022	MACS_peak_102497	796.38	839	uc008whr.2	AK046128	796.38	10.32	17.94	UCSC_knowngene	2855	chr5:3803184-3806038+	exon sense-overlapping	ENSMUST00000080085	Krit1	chr5:3803165-3844515+
chr3	95004701	95005415	MACS_peak_116847	794.47	714	uc033hww.1	BC052761	794.47	17.04	13.47	UCSC_knowngene	2439	chr3:95004012-95006450-	natural antisense	ENSMUST00000072287	Pi4kb	chr3:94974731-95006843+
chr19	41526399	41526853	MACS_peak_94087	793.58	454	uc008hma.1	AK202494	793.58	7.19	13.49	UCSC_knowngene	454	chr19:41526400-41526853+	intron sense-overlapping	ENSMUST00000067795	Lcor	chr19:41482645-41562246+
chr4	11321714	11322100	MACS_peak_121740	792.8	386	ENSMUST00000148524	Dpy19l4	792.8	16.96	13.48	Ensembl	471	chr4:11317096-11322100-	exon sense-overlapping	ENSMUST00000084892	Dpy19l4	chr4:11261315-11322137-
chr3	87617558	87618792	MACS_peak_116229	785.38	1234	ENSMUST00000136072	Arhgef11	785.38	23.63	13.52	Ensembl	2408	chr3:87617559-87699145+	exon sense-overlapping	ENSMUST00000039476	Arhgef11	chr3:87617575-87738033+
chr2	65853189	65853805	MACS_peak_101268	775.74	616	ENSMUST00000155722	Gm13619	775.74	17.68	13.57	Ensembl	2138	chr2:65852408-65860619-	intronic antisense	ENSMUST00000053910	Csrnp3	chr2:65845842-66025606+
chr7	39589597	39591560	MACS_peak_123684	774.83	1963	ENSMUST00000181075	Gm26526	774.83	15.21	18.19	Ensembl	2927	chr7:39588518-39591679-	natural antisense	ENSMUST00000098511	Gm2058	chr7:39588931-39589717+
chr11	20334833	20335350	MACS_peak_24443	757.48	517	ENSMUST00000109588	Gm12033	757.48	7.07	13.76	Ensembl	1253	chr11:20334834-20336086-	intergenic	NA	NA	NA
chr6	146996441	146996901	MACS_peak_159100	753.14	460	ENSMUST00000126774	Ppfibp1	753.14	10.9	13.92	Ensembl	700	chr6:146996442-147002249+	exon sense-overlapping	ENSMUST00000016631	Ppfibp1	chr6:146888487-147032025+
chr14	25459259	25460483	MACS_peak_53934	744.69	1224	uc007srl.1	AK047978	744.69	14.22	13.87	UCSC_knowngene	3469	chr14:25455737-25461128-	natural antisense	ENSMUST00000007961	Zmiz1	chr14:25459267-25664719+
chr9	41580740	41581402	MACS_peak_185587	742.03	662	ENSMUST00000181214	2610203C20Rik	742.03	10.47	14.03	Ensembl	3270	chr9:41580741-41592827+	intergenic	NA	NA	NA
chr11	29172126	29172951	MACS_peak_25021	741.06	825	ENSMUST00000129876	A630052C17Rik	741.06	12.62	14.03	Ensembl	2203	chr11:29170909-29173558-	natural antisense	ENSMUST00000020755	Smek2	chr11:29172890-29220797+
chr5	146575193	146576123	MACS_peak_112972	739.32	930	ENSMUST00000178171	Gm8494	739.32	20.5	18.89	Ensembl	930	chr5:146575194-146576123+	intergenic	NA	NA	NA
chr19	4121186	4121545	MACS_peak_91254	732.6	359	ENSMUST00000136043	Aip	732.6	9.58	14.18	Ensembl	674	chr19:4120933-4125790-	exon sense-overlapping	ENSMUST00000025767	Aip	chr19:4114464-4121575-
chr3	87971077	87971988	MACS_peak_99629	728.49	911	ENSMUST00000159830	Nes	728.49	5.39	19.24	Ensembl	1311	chr3:87971078-87973391+	exon sense-overlapping	ENSMUST00000090973	Nes	chr3:87971093-87980451+
chr16	31991252	31991868	MACS_peak_61722	726.24	616	ENSMUST00000119503	Hmgb1-ps6	726.24	12.74	19.29	Ensembl	616	chr16:31991253-31991868-	intron sense-overlapping	ENSMUST00000023457	Senp5	chr16:31962506-32003287-
chr3	95117814	95118377	MACS_peak_88900	715.08	563	ENSMUST00000152333	Vps72	715.08	11.35	19.23	Ensembl	2139	chr3:95116526-95119302+	exon sense-overlapping	ENSMUST00000009102	Vps72	chr3:95111022-95123051+
chr11	94634911	94635215	MACS_peak_31677	711.65	304	ENSMUST00000138782	Lrrc59	711.65	6.75	14.38	Ensembl	856	chr11:94629814-94635252+	exon sense-overlapping	ENSMUST00000021239	Lrrc59	chr11:94629767-94645216+
chr17	33981491	33981958	MACS_peak_80081	710.89	467	NR_033305	AA388235	710.89	14.28	14.36	RefSeq	3867	chr17:33981492-33985358+	intergenic	NA	NA	NA
chr17	56009254	56009586	MACS_peak_70089	710.67	332	ENSMUST00000124302	Mpnd	710.67	11.72	19.39	Ensembl	924	chr17:56009255-56012322+	exon sense-overlapping	ENSMUST00000133998	Mpnd	chr17:56005711-56011924+
chr11	116146435	116146996	MACS_peak_34130	709.95	561	ENSMUST00000126861	Fbf1	709.95	9.58	14.34	Ensembl	3391	chr11:116142285-116147139-	exon sense-overlapping	ENSMUST00000103031	Fbf1	chr11:116142285-116168153-
chr11	96912216	96912781	MACS_peak_31823	708.03	565	ENSMUST00000149033	Cdk5rap3	708.03	12.52	14.37	Ensembl	1207	chr11:96911456-96912869-	exon sense-overlapping	ENSMUST00000103152	Cdk5rap3	chr11:96907426-96916496-
chr5	115545371	115545805	MACS_peak_123209	706.47	434	ENSMUST00000152156	Pxn	706.47	16.68	19.37	Ensembl	3761	chr5:115506711-115555982+	exon sense-overlapping	ENSMUST00000067268	Pxn	chr5:115506676-115555987+
chr7	19584469	19584823	MACS_peak_137795	698.88	354	NR_125833	Clasrp	698.88	12.29	19.64	RefSeq	2468	chr7:19581038-19604486-	exon sense-overlapping	ENSMUST00000086041	Clasrp	chr7:19581044-19604468-
chr13	78236146	78236564	MACS_peak_49635	694.34	418	NR_045195	A830082K12Rik	694.34	11.88	14.49	RefSeq	2305	chr13:78198017-78236564+	natural antisense	ENSMUST00000091458	Nr2f1	chr13:78188973-78199757-
chr17	3043883	3044750	MACS_peak_65931	689.08	867	ENSMUST00000165157	Gm10232	689.08	14.49	19.77	Ensembl	867	chr17:3043884-3044750-	intergenic	NA	NA	NA
chr10	108636550	108636964	MACS_peak_21639	687.42	414	ENSMUST00000147593	Syt1	687.42	11.27	14.67	Ensembl	717	chr10:108627286-108636964-	exon sense-overlapping	ENSMUST00000064054	Syt1	chr10:108497652-109010982-
chr4	133695571	133696156	MACS_peak_99952	686.08	585	ENSMUST00000138473	Arid1a	686.08	5.51	19.16	Ensembl	3964	chr4:133689487-133753982-	exon sense-overlapping	ENSMUST00000008024	Arid1a	chr4:133679941-133756769-
chr13	104792498	104792869	MACS_peak_51154	682.64	371	uc007rtl.1	AK030777	682.64	6.59	14.71	UCSC_knowngene	1995	chr13:104792499-104794493-	exon sense-overlapping	ENSMUST00000022228	Cwc27	chr13:104631140-104816953-
chr10	73201849	73202766	MACS_peak_18285	682.29	917	ENSMUST00000171003	Gm5778	682.29	15.58	14.7	Ensembl	1072	chr10:73201695-73202766+	intergenic	NA	NA	NA
chr19	3595598	3596508	MACS_peak_91186	674.68	910	ENSMUST00000177330	Lrp5	674.68	18.6	14.86	Ensembl	8893	chr19:3584831-3686561-	exon sense-overlapping	ENSMUST00000025856	Lrp5	chr19:3584828-3686556-
chr13	69611940	69612995	MACS_peak_42343	672.08	1055	ENSMUST00000168625	Gm17108	672.08	18.86	20.12	Ensembl	2877	chr13:69610498-69614901-	exon sense-overlapping	ENSMUST00000091514	Srd5a1	chr13:69573449-69611442-
chr14	52201455	52202617	MACS_peak_48299	670.36	1162	ENSMUST00000147309	Chd8	670.36	9.95	20.27	Ensembl	3350	chr14:52199766-52204627-	exon sense-overlapping	ENSMUST00000089752	Chd8	chr14:52198151-52237572-
chr2	151503013	151503377	MACS_peak_92545	668.76	364	ENSMUST00000133197	Nsfl1c	668.76	12.15	20.21	Ensembl	685	chr2:151494311-151503423+	exon sense-overlapping	ENSMUST00000028949	Nsfl1c	chr2:151494293-151511305+
chr3	89772658	89773400	MACS_peak_116614	665.81	742	NR_130957	4632404H12Rik	665.81	13.74	15.03	RefSeq	2951	chr3:89767511-89773400-	exon sense-overlapping	ENSMUST00000038450	4632404H12Rik	chr3:89767511-89773240-
chr11	101294000	101295164	MACS_peak_28023	656.31	1164	ENSMUST00000139997	Becn1	656.31	11.99	20.37	Ensembl	3476	chr11:101288262-101302252-	exon sense-overlapping	ENSMUST00000129863	Becn1	chr11:101290484-101301737-
chr10	114801257	114802307	MACS_peak_22103	652.75	1050	ENSMUST00000152702	Trhde	652.75	21.85	15.06	Ensembl	3557	chr10:114566167-114802307-	exon sense-overlapping	ENSMUST00000061632	Trhde	chr10:114398823-114801364-
chr19	4009343	4009847	MACS_peak_91243	652.29	504	ENSMUST00000132747	Ndufv1	652.29	5.46	15.08	Ensembl	932	chr19:4008295-4009847-	exon sense-overlapping	ENSMUST00000042497	Ndufv1	chr19:4007497-4012806-
chr4	24898130	24898676	MACS_peak_122441	644.49	546	ENSMUST00000146721	Ndufaf4	644.49	10.35	15.04	Ensembl	2358	chr4:24898131-24903505+	exon sense-overlapping	ENSMUST00000029925	Ndufaf4	chr4:24898083-24905001+
chr8	109340558	109340908	MACS_peak_179657	634.54	350	NR_002928	Gm1943	634.54	9.33	15.14	RefSeq	1122	chr8:109339800-109340908-	intergenic	NA	NA	NA
chr7	16313516	16313817	MACS_peak_160000	621.43	301	ENSMUST00000147267	Bbc3	621.43	10.75	15.42	Ensembl	881	chr7:16313517-16317697+	exon sense-overlapping	ENSMUST00000002152	Bbc3	chr7:16309616-16318205+
chr4	134934455	134935049	MACS_peak_112799	619.25	594	ENSMUST00000156334	Syf2	619.25	11.02	20.87	Ensembl	816	chr4:134930902-134935049+	exon sense-overlapping	ENSMUST00000030622	Syf2	chr4:134930898-134937548+
chr14	32084906	32085286	MACS_peak_55049	614.03	380	NR_104305	Dph3	614.03	14	15.49	RefSeq	3110	chr14:32080517-32085286-	exon sense-overlapping	ENSMUST00000022461	Dph3	chr14:32080566-32085609-
chr11	8884709	8885296	MACS_peak_24111	613.76	587	ENSMUST00000119652	Gm11991	613.76	34.83	15.48	Ensembl	1074	chr11:8884223-8885296-	intron sense-overlapping	ENSMUST00000154153	Pkd1l1	chr11:8826708-8973266-
chr17	90567422	90567757	MACS_peak_84308	612.16	335	ENSMUST00000175818	Gm19815	612.16	15.6	15.54	Ensembl	335	chr17:90567423-90567757-	intron sense-overlapping	ENSMUST00000054059	Nrxn1	chr17:90037077-91088726-
chr3	107671735	107672136	MACS_peak_118060	611.53	401	ENSMUST00000138116	Ahcyl1	611.53	5.24	15.55	Ensembl	2580	chr3:107671736-107696505-	exon sense-overlapping	ENSMUST00000029490	Ahcyl1	chr3:107663120-107696560-
chr18	35610679	35611034	MACS_peak_86557	607.14	355	ENSMUST00000151126	Paip2	607.14	5.21	15.8	Ensembl	854	chr18:35610284-35613425+	exon sense-overlapping	ENSMUST00000041314	Paip2	chr18:35598617-35617186+
chr1	75547232	75547744	MACS_peak_4409	599.38	512	ENSMUST00000145516	Slc4a3	599.38	7.74	21.49	Ensembl	706	chr1:75546527-75547744+	exon sense-overlapping	ENSMUST00000124341	Slc4a3	chr1:75546266-75562172+
chr17	22776229	22776777	MACS_peak_67326	590.38	548	NR_030709	Gm16386	590.38	25.46	21.53	RefSeq	4221	chr17:22776230-22817747-	intergenic	NA	NA	NA
chr9	66545461	66545825	MACS_peak_144069	589.47	364	ENSMUST00000124519	Usp3	589.47	25.92	20.22	Ensembl	664	chr9:66545462-66566926-	exon sense-overlapping	ENSMUST00000098613	Usp3	chr9:66517227-66593036-
chr7	45498166	45498490	MACS_peak_139574	587.88	324	ENSMUST00000135779	Nucb1	587.88	6.57	21.46	Ensembl	438	chr7:45498167-45498838-	exon sense-overlapping	ENSMUST00000033096	Nucb1	chr7:45492874-45510406-
chrX	61785380	61785709	MACS_peak_168029	582.24	329	ENSMUST00000055613	Gm7327	582.24	14.42	21.63	Ensembl	651	chrX:61785381-61786032+	intergenic	NA	NA	NA
chr10	76531681	76532018	MACS_peak_14050	578.85	337	ENSMUST00000159172	Lss	578.85	10.05	20.71	Ensembl	641	chr10:76531682-76535723+	exon sense-overlapping	ENSMUST00000048678	Lss	chr10:76531607-76555479+
chr3	51560748	51561673	MACS_peak_97808	577.65	925	ENSMUST00000180404	5031434O11Rik	577.65	13.12	21.82	Ensembl	3727	chr3:51560036-51567114+	natural antisense	ENSMUST00000037141	Setd7	chr3:51515319-51560878-
chr10	59806982	59807414	MACS_peak_14720	577.49	432	ENSMUST00000032395	Gm7399	577.49	25.98	21.82	Ensembl	858	chr10:59806557-59807414+	intron sense-overlapping	ENSMUST00000020311	Micu1	chr10:59702599-59864130+
chr2	103725663	103726239	MACS_peak_103798	573.67	576	ENSMUST00000133016	Nat10	573.67	9.61	16.43	Ensembl	4543	chr2:103721260-103761241-	exon sense-overlapping	ENSMUST00000028608	Nat10	chr2:103721256-103761270-
chr11	78032271	78032665	MACS_peak_25690	573.55	394	ENSMUST00000150471	A030003K02Rik	573.55	12.83	22	Ensembl	2429	chr11:78030012-78032665-	natural antisense	ENSMUST00000021187	Dhrs13	chr11:78032280-78037866+
chr1	86582299	86582600	MACS_peak_5813	569.79	301	ENSMUST00000143674	Pde6d	569.79	8.39	16.44	Ensembl	1306	chr1:86543022-86582629-	exon sense-overlapping	ENSMUST00000027444	Pde6d	chr1:86542994-86582547-
chr17	70975458	70975966	MACS_peak_63281	563.15	508	ENSMUST00000137537	Myl12b	563.15	8.67	21.34	Ensembl	734	chr17:70974271-70975966-	exon sense-overlapping	ENSMUST00000038446	Myl12b	chr17:70973920-70990787-
chr14	50929357	50930324	MACS_peak_56314	562.59	967	ENSMUST00000159745	Tmem55b	562.59	10.24	16.4	Ensembl	3232	chr14:50927217-50930851-	exon sense-overlapping	ENSMUST00000049312	Tmem55b	chr14:50927215-50930856-
chr10	7780232	7781040	MACS_peak_13789	562.35	808	ENSMUST00000180853	B430219N15Rik	562.35	17.8	16.39	Ensembl	1105	chr10:7780185-7781289+	natural antisense	ENSMUST00000039763	Ginm1	chr10:7767947-7780917-
chr14	43121771	43122101	MACS_peak_55838	562.3	330	ENSMUST00000169632	Gm7236	562.3	9.2	16.38	Ensembl	330	chr14:43121772-43122101-	intergenic	NA	NA	NA
chrX	151801153	151801552	MACS_peak_198082	551.59	399	ENSMUST00000129714	Huwe1	551.59	7.74	16.69	Ensembl	1250	chrX:151800807-151802263+	intergenic	NA	NA	NA
chr5	124445783	124446084	MACS_peak_124441	549.98	301	ENSMUST00000134826	Setd8	549.98	10.95	22.42	Ensembl	677	chr5:124445784-124450879+	exon sense-overlapping	ENSMUST00000059580	Setd8	chr5:124439930-124462308+
chr11	118264697	118265407	MACS_peak_29969	549.95	710	ENSMUST00000141647	Usp36	549.95	8.93	22.41	Ensembl	3815	chr11:118259654-118266048-	exon sense-overlapping	ENSMUST00000092382	Usp36	chr11:118259653-118290244-
chr17	6107399	6107788	MACS_peak_66272	542.71	389	ENSMUST00000126982	Tulp4	542.71	13.13	22.78	Ensembl	906	chr17:6107400-6122344+	intron sense-overlapping	ENSMUST00000142030	Tulp4	chr17:6106479-6206914+
chr3	89177530	89178067	MACS_peak_88586	538.54	537	ENSMUST00000156447	Scamp3	538.54	7	21.76	Ensembl	802	chr3:89177531-89179452+	exon sense-overlapping	ENSMUST00000029684	Scamp3	chr3:89177473-89182765+
chr14	26459881	26460210	MACS_peak_54130	535.62	329	ENSMUST00000144737	Slmap	535.62	8.53	16.94	Ensembl	659	chr14:26459800-26463685-	exon sense-overlapping	ENSMUST00000038522	Slmap	chr14:26413175-26533740-
chr15	102625038	102625464	MACS_peak_58900	534.06	426	ENSMUST00000183786	ATF7	534.06	13.16	22.89	Ensembl	620	chr15:102593547-102625464-	exon sense-overlapping	ENSMUST00000108828	ATF7	chr15:102536643-102625453-
chr9	124423786	124424488	MACS_peak_193410	532.65	702	NR_015516	4930526I15Rik	532.65	9.86	17.04	RefSeq	1571	chr9:124423787-124424856+	natural antisense	ENSMUST00000180270	Ppp2r3d	chr9:124422622-124424154-
chr11	4177547	4178225	MACS_peak_17872	532.1	678	ENSMUST00000133095	Sf3a1	532.1	5.83	21.98	Ensembl	846	chr11:4177548-4179419+	exon sense-overlapping	ENSMUST00000002198	Sf3a1	chr11:4160350-4182541+
chr2	166995343	166996239	MACS_peak_109944	526.3	896	uc008nyz.1	AK041781	526.3	14.79	17.04	UCSC_knowngene	3594	chr2:166992646-166996239-	exon sense-overlapping	ENSMUST00000049412	Stau1	chr2:166948147-166996103-
chr2	180172033	180172439	MACS_peak_84984	524.14	406	ENSMUST00000155357	Adrm1	524.14	5.97	22.11	Ensembl	500	chr2:180171595-180172439+	exon sense-overlapping	ENSMUST00000061437	Adrm1	chr2:180171485-180176286+
chr13	98316421	98317282	MACS_peak_38802	521.87	861	ENSMUST00000062252	Gm9828	521.87	6.78	22.13	Ensembl	883	chr13:98316422-98317304+	natural antisense	ENSMUST00000022163	Btf3	chr13:98309896-98316967-
chr12	84154894	84155232	MACS_peak_35600	521.14	338	ENSMUST00000137562	Elmsan1	521.14	15.86	22.97	Ensembl	425	chr12:84152945-84155232-	exon sense-overlapping	ENSMUST00000046266	Elmsan1	chr12:84149176-84218881-
chr2	75661670	75662033	MACS_peak_87744	519.09	363	ENSMUST00000132392	Hnrnpa3	519.09	6.57	23.05	Ensembl	596	chr2:75659280-75662033+	exon sense-overlapping	ENSMUST00000090792	Hnrnpa3	chr2:75659318-75665286+
chr4	42219548	42220148	MACS_peak_123561	514.03	600	ENSMUST00000121728	Gm13301	514.03	15.41	17.27	Ensembl	2446	chr4:42216908-42235604+	natural antisense	ENSMUST00000180030	Gm10595	chr4:42219428-42219853-
chr13	21445532	21445934	MACS_peak_45652	508.1	402	ENSMUST00000122926	4930470G03Rik	508.1	14.82	17.42	Ensembl	2447	chr13:21440471-21445934+	natural antisense	ENSMUST00000032820	Zscan26	chr13:21442175-21453727-
chrX	152037590	152037896	MACS_peak_198114	505.45	306	ENSMUST00000135172	Smc1a	505.45	6.35	17.4	Ensembl	617	chrX:152036447-152038058+	exon sense-overlapping	ENSMUST00000045312	Smc1a	chrX:152016428-152062694+
chr18	5592159	5592816	MACS_peak_84563	504.44	657	ENSMUST00000161096	Gm10125	504.44	24.87	17.42	Ensembl	3491	chr18:5565652-5593505-	intronic antisense	ENSMUST00000025081	Zeb1	chr18:5591860-5775467+
chr6	18848640	18848962	MACS_peak_149093	500.22	322	ENSMUST00000136982	Naa38	500.22	10.1	17.42	Ensembl	3305	chr6:18848641-18855751+	exon sense-overlapping	ENSMUST00000056398	Naa38	chr6:18848579-18854053+
chr11	20100626	20100933	MACS_peak_24425	499.29	307	ENSMUST00000134779	Actr2	499.29	6.42	17.42	Ensembl	452	chr11:20100587-20112909-	exon sense-overlapping	ENSMUST00000000137	Actr2	chr11:20062304-20112913-
chr5	49552265	49552880	MACS_peak_138559	498.21	615	ENSMUST00000120352	Gm5555	498.21	8.79	17.45	Ensembl	1014	chr5:49552257-49553270+	intergenic	NA	NA	NA
chr8	71660340	71660649	MACS_peak_176777	497.93	309	ENSMUST00000176777	Unc13a	497.93	9.63	17.44	Ensembl	944	chr8:71660341-71671741-	exon sense-overlapping	ENSMUST00000030170	Unc13a	chr8:71624417-71671757-
chr10	79977033	79977853	MACS_peak_19189	491.71	820	ENSMUST00000126383	Tmem259	491.71	4.39	17.53	Ensembl	2656	chr10:79975890-79978940-	exon sense-overlapping	ENSMUST00000052885	Tmem259	chr10:79977118-79984330-
chr16	31428500	31429776	MACS_peak_54842	486.19	1276	ENSMUST00000182690	Gm15743	486.19	11.35	23.24	Ensembl	1901	chr16:31427876-31429776-	intronic antisense	ENSMUST00000089759	Bdh1	chr16:31422280-31457497+
chr5	34601323	34601625	MACS_peak_104726	481.43	302	ENSMUST00000145986	Add1	481.43	7.01	23.46	Ensembl	412	chr5:34573804-34601625+	exon sense-overlapping	ENSMUST00000001108	Add1	chr5:34573863-34632305+
chr9	21278952	21279531	MACS_peak_183564	477.65	579	ENSMUST00000183912	Kri1	477.65	10.34	18.08	Ensembl	2509	chr9:21278953-21287969-	exon sense-overlapping	ENSMUST00000038671	Kri1	chr9:21273457-21287969-
chr3	129826823	129827280	MACS_peak_119202	476.32	457	ENSMUST00000127864	Gar1	476.32	22.53	18.06	Ensembl	522	chr3:129825552-129827280-	exon sense-overlapping	ENSMUST00000029643	Gar1	chr3:129824912-129831396-
chr7	61202606	61202989	MACS_peak_163597	474.75	383	uc009hex.1	DOKist4	474.75	7.82	18.07	UCSC_knowngene	3503	chr7:61089568-61221965-	intergenic	NA	NA	NA
chr8	95806829	95808142	MACS_peak_178975	474.04	1313	NR_015574	4930513N10Rik	474.04	15.82	18.08	RefSeq	2803	chr8:95806830-95821728+	natural antisense	ENSMUST00000068452	Cnot1	chr8:95719451-95807462-
chr7	127845838	127846276	MACS_peak_169974	471.35	438	ENSMUST00000123180	Stx4a	471.35	7.48	18.03	Ensembl	742	chr7:127845784-127848498+	exon sense-overlapping	ENSMUST00000033075	Stx4a	chr7:127841764-127849019+
chr19	10389129	10389655	MACS_peak_92008	459.65	526	ENSMUST00000181743	Gm26859	459.65	12.41	18.21	Ensembl	1852	chr19:10389130-10391735-	natural antisense	ENSMUST00000073899	Syt7	chr19:10389090-10453181+
chr4	129197112	129197441	MACS_peak_130811	458.6	329	ENSMUST00000128287	Yars	458.6	11.09	18.21	Ensembl	647	chr4:129189902-129197441+	exon sense-overlapping	ENSMUST00000001365	Yars	chr4:129189795-129219607+
chr11	119273974	119274311	MACS_peak_26875	458.4	337	ENSMUST00000128753	Gaa	458.4	4.83	24.06	Ensembl	965	chr11:119270516-119275139+	exon sense-overlapping	ENSMUST00000026666	Gaa	chr11:119268026-119285454+
chr7	107863038	107863500	MACS_peak_144412	455.75	462	ENSMUST00000122364	Gm10156	455.75	9.52	24.43	Ensembl	462	chr7:107863039-107863500+	intergenic	NA	NA	NA
chr3	89223002	89223523	MACS_peak_99846	454.77	521	ENSMUST00000126315	Thbs3	454.77	11.26	24.48	Ensembl	4034	chr3:89215227-89226837+	exon sense-overlapping	ENSMUST00000029682	Thbs3	chr3:89215180-89226837+
chr19	10063631	10064017	MACS_peak_79148	454.5	386	uc008gpa.1	AK192544	454.5	9.43	24.5	UCSC_knowngene	386	chr19:10063632-10064017-	intergenic	NA	NA	NA
chr15	96281498	96281965	MACS_peak_67837	453.31	467	ENSMUST00000185067	2610037D02Rik	453.31	12.91	18.3	Ensembl	2997	chr15:96281499-96284495-	intergenic	NA	NA	NA
chr4	154159890	154160261	MACS_peak_114964	451.94	371	ENSMUST00000133165	Tprgl	451.94	6.07	24.48	Ensembl	947	chr4:154159567-154160606-	exon sense-overlapping	ENSMUST00000030896	Tprgl	chr4:154157485-154160666-
chr11	50202813	50203118	MACS_peak_22975	450.04	305	ENSMUST00000147846	Sqstm1	450.04	4.82	24.66	Ensembl	457	chr11:50202443-50203118-	exon sense-overlapping	ENSMUST00000015981	Sqstm1	chr11:50199366-50210791-
chr11	69314710	69315137	MACS_peak_24693	447.46	427	ENSMUST00000148490	Cntrob	447.46	16.93	24.66	Ensembl	622	chr11:69310043-69315137-	exon sense-overlapping	ENSMUST00000092973	Cntrob	chr11:69299487-69323775-
chr10	41485641	41486609	MACS_peak_16073	445.33	968	ENSMUST00000126833	Smpd2	445.33	10.35	18.44	Ensembl	4150	chr10:41485642-41490330-	exon sense-overlapping	ENSMUST00000019965	Smpd2	chr10:41487172-41490340-
chr17	6131853	6132405	MACS_peak_58865	442.5	552	ENSMUST00000078419	Gm15590	442.5	6.07	24.64	Ensembl	552	chr17:6131854-6132405-	intronic antisense	ENSMUST00000142030	Tulp4	chr17:6106479-6206914+
chr2	55435763	55437860	MACS_peak_86466	439.38	2097	ENSMUST00000180810	Gm26794	439.38	6.66	24.86	Ensembl	4312	chr2:55433514-55437860-	natural antisense	ENSMUST00000067101	Kcnj3	chr2:55435970-55598145+
chr7	29167052	29167973	MACS_peak_138527	438.68	921	ENSMUST00000130390	Spred3	438.68	20.21	24.94	Ensembl	2368	chr7:29165923-29169841-	exon sense-overlapping	ENSMUST00000048923	Spred3	chr7:29158829-29168647-
chr17	65802855	65803295	MACS_peak_82014	433.33	440	ENSMUST00000162408	Ppp4r1	433.33	15.04	18.71	Ensembl	715	chr17:65802745-65810594+	exon sense-overlapping	ENSMUST00000073104	Ppp4r1	chr17:65783355-65841926+
chr16	85553232	85553943	MACS_peak_57609	432.57	711	ENSMUST00000161209	Gm2541	432.57	16.1	24.8	Ensembl	711	chr16:85553233-85553943-	intergenic	NA	NA	NA
chr17	6121827	6123622	MACS_peak_66278	431.53	1795	uc012aji.1	AK077171	431.53	11.58	25.04	UCSC_knowngene	2527	chr17:6106437-6124137+	exon sense-overlapping	ENSMUST00000142030	Tulp4	chr17:6106479-6206914+
chr11	115276142	115276724	MACS_peak_33978	431.19	582	ENSMUST00000139437	Fdxr	431.19	9.39	18.72	Ensembl	861	chr11:115271827-115276724-	exon sense-overlapping	ENSMUST00000021078	Fdxr	chr11:115268024-115277050-
chr15	93387746	93388058	MACS_peak_67547	429.57	312	ENSMUST00000159105	Zcrb1	429.57	6.84	18.78	Ensembl	434	chr15:93387617-93388144-	exon sense-overlapping	ENSMUST00000076070	Zcrb1	chr15:93386106-93398334-
chr2	160754760	160755163	MACS_peak_93622	426.22	403	ENSMUST00000129568	Plcg1	426.22	8.88	25.08	Ensembl	545	chr2:160754547-160755169+	exon sense-overlapping	ENSMUST00000103115	Plcg1	chr2:160731310-160775760+
chrX	103013697	103014387	MACS_peak_169196	422.8	690	ENSMUST00000124538	Pabpc1l2b-ps	422.8	8.61	25.19	Ensembl	690	chrX:103013698-103014387+	intergenic	NA	NA	NA
chr8	104641310	104641699	MACS_peak_179210	420.18	389	ENSMUST00000163140	Fam96b	420.18	10.85	18.88	Ensembl	807	chr8:104639841-104641699-	exon sense-overlapping	ENSMUST00000093234	Fam96b	chr8:104639848-104641701-
chr11	74836325	74836948	MACS_peak_22217	413.15	623	ENSMUST00000133217	Mnt	413.15	6.36	25.61	Ensembl	777	chr11:74836326-74837723+	exon sense-overlapping	ENSMUST00000000291	Mnt	chr11:74830920-74845725+
chr11	98350717	98351540	MACS_peak_32087	412.64	823	NR_045477	1700003D09Rik	412.64	9.39	19.04	RefSeq	1389	chr11:98350718-98358283-	natural antisense	ENSMUST00000078694	Ppp1r1b	chr11:98348404-98357796+
chr15	100585735	100586772	MACS_peak_58674	410.4	1037	ENSMUST00000176271	Pou6f1	410.4	8.87	25.62	Ensembl	5301	chr15:100575318-100592037-	exon sense-overlapping	ENSMUST00000058274	Pou6f1	chr15:100578247-100595034-
chr8	122407842	122408528	MACS_peak_138668	407.06	686	ENSMUST00000177123	Zc3h18	407.06	14.93	26.03	Ensembl	4789	chr8:122407843-122417359+	exon sense-overlapping	ENSMUST00000017622	Zc3h18	chr8:122376609-122417359+
chr15	76422836	76423835	MACS_peak_55912	404	999	ENSMUST00000160986	Mroh1	404	25.37	25.57	Ensembl	9830	chr15:76380523-76453035+	exon sense-overlapping	ENSMUST00000092595	Mroh1	chr15:76390031-76439744+
chr4	41569176	41569538	MACS_peak_93733	401.95	362	ENSMUST00000146276	Fam219a	401.95	7.63	26.23	Ensembl	661	chr4:41524116-41569538-	exon sense-overlapping	ENSMUST00000108049	Fam219a	chr4:41517691-41569509-
chr5	148928525	148929000	MACS_peak_147884	398.83	475	ENSMUST00000110508	Katnal1	398.83	13.28	19.27	Ensembl	2210	chr5:148885726-148929000-	exon sense-overlapping	ENSMUST00000047257	Katnal1	chr5:148874332-148928647-
chr7	44865471	44866774	MACS_peak_123899	398.61	1303	ENSMUST00000140732	Ptov1	398.61	5.27	26.2	Ensembl	2932	chr7:44863068-44866774-	exon sense-overlapping	ENSMUST00000046575	Ptov1	chr7:44863068-44869788-
chr3	89168694	89169332	MACS_peak_116497	397.8	638	ENSMUST00000138822	Clk2	397.8	13.29	19.24	Ensembl	3168	chr3:89164819-89176919+	exon sense-overlapping	ENSMUST00000090927	Clk2	chr3:89164818-89176921+
chr5	100038719	100039664	MACS_peak_141517	397.41	945	ENSMUST00000086900	Hnrnpdl	397.41	10.63	19.25	Ensembl	2149	chr5:100034727-100039664-	exon sense-overlapping	ENSMUST00000128187	Hnrnpdl	chr5:100033577-100039222-
chr5	149050372	149050751	MACS_peak_147895	396.13	379	ENSMUST00000123645	Hmgb1	396.13	8.92	19.3	Ensembl	461	chr5:149050373-149052981-	exon sense-overlapping	ENSMUST00000085546	Hmgb1	chr5:149046702-149053040-
chr11	59505661	59506691	MACS_peak_23835	394.91	1030	ENSMUST00000138763	4933439C10Rik	394.91	11.93	25.78	Ensembl	2624	chr11:59505662-59513647+	natural antisense	ENSMUST00000013262	Zkscan17	chr11:59485520-59506644-
chr11	98010003	98010376	MACS_peak_24476	393.01	373	ENSMUST00000124170	Cacnb1	393.01	9.17	26.23	Ensembl	721	chr11:98009660-98012551-	exon sense-overlapping	ENSMUST00000017552	Cacnb1	chr11:98001508-98022634-
chr2	27454114	27454504	MACS_peak_74778	389.89	390	ENSMUST00000130932	Brd3	389.89	8.42	26.36	Ensembl	2893	chr2:27452996-27475653-	exon sense-overlapping	ENSMUST00000028282	Brd3	chr2:27445579-27475398-
chr3	105452552	105452955	MACS_peak_117856	385.13	403	NR_040759	Kcnd3os	385.13	8.98	19.59	RefSeq	1090	chr3:105448190-105452955-	natural antisense	ENSMUST00000098761	Kcnd3	chr3:105452330-105674002+
chr9	20869603	20870154	MACS_peak_140305	383.86	551	ENSMUST00000175820	A230050P20Rik	383.86	9.49	26.69	Ensembl	3210	chr9:20868658-20874307+	exon sense-overlapping	ENSMUST00000043911	A230050P20Rik	chr9:20868642-20874307+
chr8	84713765	84714068	MACS_peak_177942	382.76	303	ENSMUST00000132236	Nfix	382.76	5	19.74	Ensembl	347	chr8:84708634-84714068-	exon sense-overlapping	ENSMUST00000076715	Nfix	chr8:84708614-84800140-
chr2	110040573	110041263	MACS_peak_104237	382.44	690	ENSMUST00000126990	Ccdc34	382.44	10.11	19.73	Ensembl	840	chr2:110021973-110041263+	exon sense-overlapping	ENSMUST00000028580	Ccdc34	chr2:110017817-110045316+
chr5	115348564	115348914	MACS_peak_109444	378.34	350	ENSMUST00000137766	Cox6a1	378.34	4.62	26.68	Ensembl	620	chr5:115345657-115348914-	exon sense-overlapping	ENSMUST00000040154	Cox6a1	chr5:115345642-115348981-
chr11	102206421	102207166	MACS_peak_24905	377.07	745	ENSMUST00000149087	Hdac5	377.07	6.5	26.85	Ensembl	5406	chr11:102195749-102218929-	exon sense-overlapping	ENSMUST00000008999	Hdac5	chr11:102195744-102230124-
chr7	25228722	25230160	MACS_peak_138033	376.66	1438	NR_046001	9130221H12Rik	376.66	5.3	26.27	RefSeq	1542	chr7:25228723-25230264+	exon sense-overlapping	ENSMUST00000169914	9130221H12Rik	chr7:25228687-25230257+
chr2	85045354	85045772	MACS_peak_102711	375.09	418	ENSMUST00000127069	Ssrp1	375.09	8.97	19.79	Ensembl	451	chr2:85045355-85046285+	exon sense-overlapping	ENSMUST00000077798	Ssrp1	chr2:85037234-85047109+
chr5	76997225	76997582	MACS_peak_140347	374.78	357	ENSMUST00000132860	Srp72	374.78	3.32	19.82	Ensembl	2355	chr5:76996974-76999937+	exon sense-overlapping	ENSMUST00000101087	Srp72	chr5:76974683-76999937+
chr7	30193545	30194101	MACS_peak_123270	372.37	556	ENSMUST00000146852	Capns1	372.37	7.01	26.9	Ensembl	587	chr7:30193546-30195036-	exon sense-overlapping	ENSMUST00000001845	Capns1	chr7:30186942-30195164-
chr9	91097147	91098500	MACS_peak_190100	370.75	1353	ENSMUST00000077991	Gm5620	370.75	11.34	19.92	Ensembl	1353	chr9:91097148-91098500+	intergenic	NA	NA	NA
chr16	84977689	84979296	MACS_peak_57562	367.98	1607	uc007zts.1	Gm10791	367.98	9.81	27.06	UCSC_knowngene	3429	chr16:84972211-84979451+	natural antisense	ENSMUST00000005406	App	chr16:84954440-85173707-
chr6	83796906	83797275	MACS_peak_153741	367.3	369	ENSMUST00000150322	Nagk	367.3	7.06	19.9	Ensembl	803	chr6:83795161-83798621+	exon sense-overlapping	ENSMUST00000037376	Nagk	chr6:83794982-83802556+
chr4	129899092	129899902	MACS_peak_112177	366.8	810	ENSMUST00000118024	Gm12966	366.8	10.5	26.51	Ensembl	810	chr4:129899093-129899902+	intergenic	NA	NA	NA
chr15	100774629	100774963	MACS_peak_68373	366.61	334	ENSMUST00000160256	Slc4a8	366.61	13.44	19.91	Ensembl	421	chr15:100761888-100774963+	exon sense-overlapping	ENSMUST00000023776	Slc4a8	chr15:100761747-100823968+
chr11	6274397	6274870	MACS_peak_23966	365.79	473	ENSMUST00000130621	Tmed4	365.79	7.76	19.92	Ensembl	886	chr11:6271661-6274870-	exon sense-overlapping	ENSMUST00000004508	Tmed4	chr11:6270369-6274870-
chr2	72162601	72163140	MACS_peak_87583	365.77	539	uc008kbp.1	Rapgef4	365.77	16.51	26.57	UCSC_knowngene	987	chr2:72140728-72163386+	exon sense-overlapping	ENSMUST00000028525	Rapgef4	chr2:72054604-72257472+
chr16	84834808	84835298	MACS_peak_64861	364.28	490	ENSMUST00000127651	Atp5j	364.28	6.98	26.77	Ensembl	927	chr16:84831071-84835298-	exon sense-overlapping	ENSMUST00000023608	Atp5j	chr16:84827871-84835625-
chr2	26344237	26344758	MACS_peak_84100	363.19	521	ENSMUST00000142057	Gpsm1	363.19	12.9	26.74	Ensembl	834	chr2:26344238-26346910+	exon sense-overlapping	ENSMUST00000066889	Gpsm1	chr2:26319773-26348237+
chr3	88775238	88775713	MACS_peak_116430	360.07	475	uc008pwo.1	5830417I10Rik	360.07	8.04	20.2	UCSC_knowngene	1410	chr3:88775239-88854795+	exon sense-overlapping	ENSMUST00000081695	Gon4l	chr3:88837016-88910098+
chr16	14170337	14170679	MACS_peak_70279	357.93	342	ENSMUST00000133249	Nde1	357.93	10.31	20.35	Ensembl	681	chr16:14163304-14170829+	exon sense-overlapping	ENSMUST00000023359	Nde1	chr16:14163275-14192928+
chr7	98709876	98710233	MACS_peak_167129	355.46	357	ENSMUST00000146473	Prkrir	355.46	8.35	20.36	Ensembl	670	chr7:98709877-98715257+	exon sense-overlapping	ENSMUST00000033009	Prkrir	chr7:98703103-98718062+
chr12	80112682	80113000	MACS_peak_31063	355.05	318	ENSMUST00000181323	Gm26669	355.05	10.81	27.42	Ensembl	1808	chr12:80108034-80113000+	natural antisense	ENSMUST00000021552	Zfp36l1	chr12:80107760-80113013-
chr5	148182947	148184377	MACS_peak_147811	353.17	1430	ENSMUST00000150411	Gm10167	353.17	11.65	20.44	Ensembl	1479	chr5:148182899-148184377-	intronic antisense	ENSMUST00000085558	Mtus2	chr5:147957320-148316065+
chr12	24680629	24681813	MACS_peak_36760	353.12	1184	ENSMUST00000074163	Cys1	353.12	14.64	20.44	Ensembl	1856	chr12:24665838-24681813-	exon sense-overlapping	ENSMUST00000156453	Cys1	chr12:24666698-24680908-
chr5	120682567	120682915	MACS_peak_110033	347.65	348	ENSMUST00000144889	Dtx1	347.65	5.61	27.9	Ensembl	871	chr5:120681202-120682915-	exon sense-overlapping	ENSMUST00000031607	Dtx1	chr5:120680202-120711927-
chr11	96800770	96801405	MACS_peak_31811	346.24	635	ENSMUST00000141257	Cbx1	346.24	5.81	20.67	Ensembl	814	chr11:96789175-96801405+	exon sense-overlapping	ENSMUST00000018810	Cbx1	chr11:96789127-96803969+
chr1	92641606	92641948	MACS_peak_6493	342.97	342	NR_028108	Myeov2	342.97	10.28	20.81	RefSeq	760	chr1:92637145-92641948-	exon sense-overlapping	ENSMUST00000097642	Myeov2	chr1:92637145-92641985-
chr1	190937251	190937700	MACS_peak_13022	341.34	449	ENSMUST00000146048	Angel2	341.34	10.15	20.94	Ensembl	632	chr1:190937252-190939269+	exon sense-overlapping	ENSMUST00000027947	Angel2	chr1:190925112-190946962+
chr1	132359993	132361215	MACS_peak_8560	341.22	1222	ENSMUST00000138717	Tmcc2	341.22	3.27	20.94	Ensembl	4004	chr1:132356316-132367886-	exon sense-overlapping	ENSMUST00000045473	Tmcc2	chr1:132356315-132391281-
chr2	156017796	156018279	MACS_peak_108541	336.49	483	ENSMUST00000137545	Ergic3	336.49	5.64	21.12	Ensembl	654	chr2:156017546-156018279+	exon sense-overlapping	ENSMUST00000006035	Ergic3	chr2:156008045-156018279+
chr4	141006042	141006848	MACS_peak_100809	335.69	806	ENSMUST00000151517	Atp13a2	335.69	7.14	28.86	Ensembl	4266	chr4:140986900-141007330+	exon sense-overlapping	ENSMUST00000037055	Atp13a2	chr4:140986873-141007330+
chr4	43669555	43670034	MACS_peak_94053	335.11	479	ENSMUST00000134869	Tmem8b	335.11	7.59	28.82	Ensembl	1243	chr4:43669556-43686413+	exon sense-overlapping	ENSMUST00000107864	Tmem8b	chr4:43669287-43692668+
chr5	120122791	120123308	MACS_peak_123700	330.18	517	NR_045793	Gm10390	330.18	8.77	27.93	RefSeq	3977	chr5:120121096-120139263-	natural antisense	ENSMUST00000031590	Rbm19	chr5:120116510-120197979+
chr10	70174785	70175167	MACS_peak_18097	326.75	382	ENSMUST00000145990	Ccdc6	326.75	6.36	21.28	Ensembl	706	chr10:70174509-70182206+	exon sense-overlapping	ENSMUST00000135607	Ccdc6	chr10:70175047-70188187+
chr14	55420268	55420724	MACS_peak_56542	326.66	456	ENSMUST00000074642	Gm8894	326.66	11.85	21.28	Ensembl	456	chr14:55420269-55420724-	intergenic	NA	NA	NA
chr10	42812435	42812742	MACS_peak_16234	325.33	307	ENSMUST00000144228	Sec63	325.33	4.68	21.26	Ensembl	4137	chr10:42761806-42812742+	exon sense-overlapping	ENSMUST00000019937	Sec63	chr10:42761496-42832514+
chr1	132880354	132880842	MACS_peak_8677	324.25	488	ENSMUST00000159088	Lrrn2	324.25	8.12	21.3	Ensembl	658	chr1:132880355-132937150+	exon sense-overlapping	ENSMUST00000027706	Lrrn2	chr1:132880273-132940005+
chr12	100946996	100947840	MACS_peak_36926	324.24	844	ENSMUST00000180617	A630072L19Rik	324.24	14.01	28.28	Ensembl	3405	chr12:100941742-100949875+	natural antisense	ENSMUST00000068411	Ccdc88c	chr12:100912700-101028983-
chr6	124449489	124450172	MACS_peak_120321	323.64	683	ENSMUST00000147947	Clstn3	323.64	9.1	29.33	Ensembl	765	chr6:124438904-124450172-	exon sense-overlapping	ENSMUST00000008297	Clstn3	chr6:124430759-124464794-
chr17	24895605	24896228	MACS_peak_67521	321.21	623	uc008ayx.2	Mapk8ip3	321.21	4.75	28.5	UCSC_knowngene	7318	chr17:24892152-24936977-	exon sense-overlapping	ENSMUST00000088345	Mapk8ip3	chr17:24897533-24936968-
chrX	50634944	50635321	MACS_peak_148880	318.05	377	NR_015505	Firre	318.05	6.3	29.24	RefSeq	5832	chrX:50563120-50635321-	intergenic	NA	NA	NA
chr2	68861441	68861989	MACS_peak_87262	317.68	548	ENSMUST00000183755	Cers6	317.68	7.61	28.63	Ensembl	1283	chr2:68861442-68862724+	exon sense-overlapping	ENSMUST00000028426	Cers6	chr2:68861441-69114282+
chr11	98798395	98799233	MACS_peak_24578	313.15	838	NR_033551	Gm12359	313.15	7.8	29.43	RefSeq	1401	chr11:98798309-98810089-	intronic antisense	ENSMUST00000126969	Msl1	chr11:98800165-98804119+
chr6	91517047	91517481	MACS_peak_118172	312.3	434	ENSMUST00000123569	Lsm3	312.3	8.46	29.52	Ensembl	466	chr6:91516047-91517481+	exon sense-overlapping	ENSMUST00000040607	Lsm3	chr6:91515928-91522625+
chr12	101914752	101915184	MACS_peak_42727	309.25	432	ENSMUST00000177547	Gm20036	309.25	19	21.81	Ensembl	844	chr12:101913240-101915335+	natural antisense	ENSMUST00000021605	Trip11	chr12:101834043-101913267-
chr7	141466881	141467771	MACS_peak_171048	308.62	890	uc012fxf.1	AK149132	308.62	8.91	21.91	UCSC_knowngene	1671	chr7:141461483-141467771-	intronic antisense	ENSMUST00000053670	Efcab4a	chr7:141461094-141466613+
chr2	11587390	11587794	MACS_peak_96781	308.58	404	ENSMUST00000131036	Rbm17	308.58	8.23	21.91	Ensembl	738	chr2:11587391-11590858-	exon sense-overlapping	ENSMUST00000040314	Rbm17	chr2:11585439-11603235-
chr7	139840227	139840967	MACS_peak_170915	308.5	740	ENSMUST00000129454	Gpr123	308.5	11.63	21.9	Ensembl	1413	chr7:139834962-139841204+	exon sense-overlapping	ENSMUST00000026548	Gpr123	chr7:139834174-139878088+
chr5	135731562	135731878	MACS_peak_111812	308.36	316	ENSMUST00000147515	Por	308.36	6.22	29.55	Ensembl	918	chr5:135716005-135731878+	exon sense-overlapping	ENSMUST00000005651	Por	chr5:135689036-135735326+
chr17	6121207	6122164	MACS_peak_77209	308.11	957	ENSMUST00000061073	Gm5812	308.11	6.41	21.91	Ensembl	957	chr17:6121208-6122164-	intronic antisense	ENSMUST00000142030	Tulp4	chr17:6106479-6206914+
chr8	71472036	71472505	MACS_peak_135164	305.97	469	ENSMUST00000150984	Dda1	305.97	6.27	29.59	Ensembl	620	chr8:71469285-71472615+	exon sense-overlapping	ENSMUST00000124745	Dda1	chr8:71469199-71476098+
chr5	121801778	121802265	MACS_peak_110212	304.25	487	ENSMUST00000162459	Atxn2	304.25	6.72	29.7	Ensembl	754	chr5:121801746-121810951+	exon sense-overlapping	ENSMUST00000051950	Atxn2	chr5:121711609-121814949+
chr8	45803319	45803746	MACS_peak_174893	303.78	427	ENSMUST00000136344	Sorbs2	303.78	8.66	22.13	Ensembl	626	chr8:45803208-45803919+	exon sense-overlapping	ENSMUST00000067065	Sorbs2	chr8:45507788-45827906+
chr15	78952722	78953255	MACS_peak_56252	302.93	533	ENSMUST00000137934	Triobp	302.93	17.4	29.42	Ensembl	2446	chr15:78948245-78953255+	exon sense-overlapping	ENSMUST00000109689	Triobp	chr15:78947724-79005867+
chr9	45890508	45890943	MACS_peak_142343	302.11	435	ENSMUST00000160469	Rnf214	302.11	5.76	29.87	Ensembl	580	chr9:45890509-45898435-	exon sense-overlapping	ENSMUST00000058720	Rnf214	chr9:45863691-45906877-
chr3	88830755	88832531	MACS_peak_88522	300.37	1776	ENSMUST00000184013	RP23-199B2.4	300.37	9.9	29.91	Ensembl	2484	chr3:88830048-88832531-	intergenic	NA	NA	NA
chr9	44384661	44385305	MACS_peak_160242	297.9	644	ENSMUST00000161537	Hyou1	297.9	5.97	29.53	Ensembl	4925	chr9:44379557-44390736+	exon sense-overlapping	ENSMUST00000066601	Hyou1	chr9:44379490-44392369+
chr13	21500952	21501352	MACS_peak_35062	297.13	400	ENSMUST00000177829	Gm11273	297.13	6.19	30.06	Ensembl	475	chr13:21500953-21501430-	exon sense-overlapping	ENSMUST00000044043	Gm11273	chr13:21501029-21501418-
chr11	69903007	69903719	MACS_peak_21846	296.82	712	ENSMUST00000177160	Neurl4	296.82	6.1	30.14	Ensembl	1438	chr11:69902027-69905597+	exon sense-overlapping	ENSMUST00000061837	Neurl4	chr11:69901891-69913820+
chr2	130879741	130880214	MACS_peak_91085	294.8	473	uc008mkb.2	A730017L22Rik	294.8	12.88	29.66	UCSC_knowngene	3095	chr2:130879699-130906396-	exon sense-overlapping	ENSMUST00000146975	4930402H24Rik	chr2:130812866-130906406-
chr2	32712564	32713076	MACS_peak_75456	292.25	512	ENSMUST00000123170	Cdk9	292.25	9.95	30.31	Ensembl	1689	chr2:32707849-32713076-	exon sense-overlapping	ENSMUST00000009699	Cdk9	chr2:32707438-32712784-
chr7	28815279	28816960	MACS_peak_160995	290.8	1681	ENSMUST00000173750	Hnrnpl	290.8	7.91	22.46	Ensembl	2275	chr7:28808806-28816960+	exon sense-overlapping	ENSMUST00000038572	Hnrnpl	chr7:28810890-28822266+
chr6	113341530	113341982	MACS_peak_156257	290.75	452	uc009dfm.2	Camk1	290.75	7.56	22.45	UCSC_knowngene	1158	chr6:113340912-113343922-	exon sense-overlapping	ENSMUST00000032409	Camk1	chr6:113334124-113343984-
chr16	97961792	97962628	MACS_peak_76757	290.04	836	uc008ady.1	AK170928	290.04	9.34	22.45	UCSC_knowngene	4289	chr16:97958340-97962628-	exon sense-overlapping	ENSMUST00000052089	Zbtb21	chr16:97947435-97962621-
chr15	75896242	75896740	MACS_peak_49623	288.96	498	ENSMUST00000134222	Eef1d	288.96	4.52	30.38	Ensembl	793	chr15:75895492-75896740-	exon sense-overlapping	ENSMUST00000023235	Eef1d	chr15:75895804-75909329-
chr14	20702751	20703099	MACS_peak_53457	288.28	348	NR_029446	6230400D17Rik	288.28	7.49	22.51	RefSeq	1088	chr14:20702012-20703099-	natural antisense	ENSMUST00000071215	Chchd1	chr14:20703027-20704417+
chrX	21360939	21363022	MACS_peak_148456	287.03	2083	ENSMUST00000132683	Gm5124	287.03	4.79	30.43	Ensembl	2083	chrX:21360940-21363022+	intergenic	NA	NA	NA
chr11	70981975	70983007	MACS_peak_21959	286.52	1032	ENSMUST00000179291	C1qbp	286.52	4.81	30.46	Ensembl	1998	chr11:70981010-70983007-	exon sense-overlapping	ENSMUST00000078528	C1qbp	chr11:70977836-70983026-
chrX	53418408	53418931	MACS_peak_194882	286.1	523	ENSMUST00000118956	Gm14584	286.1	7.39	22.59	Ensembl	637	chrX:53418331-53418967+	intergenic	NA	NA	NA
chr16	91009454	91010169	MACS_peak_75995	284.78	715	ENSMUST00000156140	Synj1	284.78	7.82	22.59	Ensembl	947	chr16:91009314-91011063-	exon sense-overlapping	ENSMUST00000118390	Synj1	chr16:90938240-91011113-
chr6	146554491	146554812	MACS_peak_159039	281.89	321	ENSMUST00000132963	Asun	281.89	15.71	22.73	Ensembl	454	chr6:146554082-146554812-	exon sense-overlapping	ENSMUST00000032427	Asun	chr6:146549632-146577835-
chr3	94863913	94864378	MACS_peak_100157	280.65	465	ENSMUST00000132544	Pogz	280.65	11.16	30.11	Ensembl	744	chr3:94863728-94864550+	exon sense-overlapping	ENSMUST00000042402	Pogz	chr3:94837713-94880875+
chr15	67175554	67176726	MACS_peak_49127	278.82	1172	uc007wbc.1	AK169958	278.82	14.25	30.54	UCSC_knowngene	3090	chr15:67173637-67176726-	exon sense-overlapping	NM_009177	St3gal1	chr15:67102875-67176882-
chr3	51240205	51240511	MACS_peak_97750	278.8	306	ENSMUST00000144826	Ccrn4l	278.8	8.13	30.13	Ensembl	9797	chr3:51240206-51251624+	exon sense-overlapping	ENSMUST00000023849	Ccrn4l	chr3:51224447-51251644+
chr10	80282866	80283177	MACS_peak_19245	277.31	311	ENSMUST00000151619	Dazap1	277.31	7.67	22.94	Ensembl	454	chr10:80282867-80284521+	exon sense-overlapping	ENSMUST00000092305	Dazap1	chr10:80265074-80288408+
chr4	43518401	43519078	MACS_peak_123854	276.69	677	ENSMUST00000150262	Tpm2	276.69	10.01	22.94	Ensembl	1545	chr4:43514711-43523438-	exon sense-overlapping	ENSMUST00000030184	Tpm2	chr4:43514711-43523464-
chr11	77348252	77348914	MACS_peak_22569	276.4	662	ENSMUST00000180394	Ssh2	276.4	9.89	31	Ensembl	3446	chr11:77346743-77350188+	exon sense-overlapping	ENSMUST00000181283	Ssh2	chr11:77348282-77455521+
chr6	134233169	134233994	MACS_peak_158050	276.33	825	ENSMUST00000171098	Gm17089	276.33	16.99	22.96	Ensembl	1394	chr6:134233158-134243711-	natural antisense	ENSMUST00000081028	Etv6	chr6:134035700-134270158+
chr8	107037479	107038019	MACS_peak_179499	276.29	540	ENSMUST00000118457	Gm16209	276.29	6.35	22.97	Ensembl	627	chr8:107037480-107038106-	intronic antisense	ENSMUST00000034388	Vps4a	chr8:107031222-107045755+
chr19	46033744	46034512	MACS_peak_72198	276.11	768	ENSMUST00000126320	Ldb1	276.11	9.56	31.04	Ensembl	907	chr19:46033745-46034878-	exon sense-overlapping	ENSMUST00000026252	Ldb1	chr19:46032689-46044914-
chr7	27258805	27260302	MACS_peak_138203	275.02	1497	ENSMUST00000149805	Numbl	275.02	14.16	30.36	Ensembl	8511	chr7:27258806-27282144+	exon sense-overlapping	ENSMUST00000079258	Numbl	chr7:27258725-27282141+
chr4	34353979	34354691	MACS_peak_93305	274.72	712	ENSMUST00000177911	Gm12751	274.72	11.01	31.08	Ensembl	875	chr4:34353980-34354854+	intergenic	NA	NA	NA
chr4	135323767	135324109	MACS_peak_100114	272.6	342	ENSMUST00000136570	Srrm1	272.6	10.53	31.03	Ensembl	373	chr4:135323768-135324849-	exon sense-overlapping	ENSMUST00000030613	Srrm1	chr4:135322033-135353136-
chr4	142146769	142147145	MACS_peak_100983	272.6	376	ENSMUST00000144611	Kazn	272.6	11.18	31.02	Ensembl	723	chr4:142146770-142154586-	exon sense-overlapping	ENSMUST00000036476	Kazn	chr4:142139240-142239401-
chr10	77981491	77981978	MACS_peak_16141	269.88	487	ENSMUST00000123999	1810043G02Rik	269.88	8.62	30.65	Ensembl	4492	chr10:77978671-77985434+	exon sense-overlapping	ENSMUST00000105397	1810043G02Rik	chr10:77978524-77985434+
chr4	156173002	156173680	MACS_peak_102408	268.65	678	ENSMUST00000181062	Agrn	268.65	5.13	31.54	Ensembl	8612	chr4:156165294-156186107-	exon sense-overlapping	ENSMUST00000071248	Agrn	chr4:156165290-156185901-
chr16	4875366	4877017	MACS_peak_52734	267.54	1651	ENSMUST00000143873	Ubald1	267.54	6.21	31.62	Ensembl	4749	chr16:4874788-4879805-	exon sense-overlapping	ENSMUST00000037843	Ubald1	chr16:4874778-4880315-
chr6	117997206	117997895	MACS_peak_134783	265.69	689	ENSMUST00000118257	Gm4875	265.69	21.49	31	Ensembl	786	chr6:117997207-117997992+	intergenic	NA	NA	NA
chrX	112162627	112163032	MACS_peak_169528	265.52	405	ENSMUST00000118081	Gm6335	265.52	9	31	Ensembl	1194	chrX:112162554-112163747+	intergenic	NA	NA	NA
chr12	17881905	17882322	MACS_peak_36251	265.2	417	uc007ncz.1	BC031503	265.2	8.16	23.52	UCSC_knowngene	1939	chr12:17881906-17939632+	intron sense-overlapping	ENSMUST00000169657	B430203G13Rik	chr12:17924294-17925668+
chr9	103363415	103364267	MACS_peak_146140	264.04	852	uc009rgs.1	AK048941	264.04	6.16	31.71	UCSC_knowngene	2664	chr9:103361604-103364267-	exon sense-overlapping	ENSMUST00000035484	Cdv3	chr9:103353103-103365780-
chr9	56417530	56418050	MACS_peak_161411	263.32	520	uc029xbg.1	AK172478	263.32	16.13	31.19	UCSC_knowngene	1352	chr9:56416699-56418050-	exon sense-overlapping	ENSMUST00000061552	C230081A13Rik	chr9:56201131-56418050-
chr7	4742453	4743009	MACS_peak_137101	261.07	556	ENSMUST00000152500	Suv420h2	261.07	8.76	31.4	Ensembl	892	chr7:4742454-4743481+	exon sense-overlapping	ENSMUST00000098853	Suv420h2	chr7:4740115-4747514+
chr2	169883511	169886798	MACS_peak_110281	260.75	3287	ENSMUST00000181446	Gm26883	260.75	10.58	23.59	Ensembl	5115	chr2:169633646-169888503-	natural antisense	ENSMUST00000109157	Tshz2	chr2:169633676-169888504+
chr18	60815996	60816528	MACS_peak_67534	259.31	532	ENSMUST00000163446	Tcof1	259.31	3.81	32.01	Ensembl	4064	chr18:60815997-60848959-	exon sense-overlapping	ENSMUST00000175934	Tcof1	chr18:60813755-60848929-
chrX	101292543	101292925	MACS_peak_150116	258.45	382	ENSMUST00000148846	Med12	258.45	10.16	31.99	Ensembl	3273	chrX:101286024-101297465+	exon sense-overlapping	ENSMUST00000087948	Med12	chrX:101274260-101297465+
chr2	91709822	91710542	MACS_peak_78620	257.05	720	uc033hog.1	AK085328	257.05	16.32	32.04	UCSC_knowngene	2280	chr2:91708263-91710542-	exon sense-overlapping	ENSMUST00000028678	Atg13	chr2:91674619-91710519-
chr11	100372295	100372716	MACS_peak_24663	256.96	421	ENSMUST00000124659	Jup	256.96	7.57	32.02	Ensembl	2913	chr11:100368958-100372716-	exon sense-overlapping	ENSMUST00000001592	Jup	chr11:100370619-100397749-
chrX	105373594	105374398	MACS_peak_196853	256.73	804	NR_015552	5330434G04Rik	256.73	10.75	23.75	RefSeq	3449	chrX:105372994-105391754-	intergenic	NA	NA	NA
chr3	89340415	89340919	MACS_peak_99863	255.5	504	ENSMUST00000155868	Adam15	255.5	5.77	31.7	Ensembl	668	chr3:89339915-89340919-	exon sense-overlapping	ENSMUST00000029676	Adam15	chr3:89339640-89349996-
chr5	130188394	130188796	MACS_peak_145289	254.83	402	ENSMUST00000118998	Gm15920	254.83	8.38	23.86	Ensembl	402	chr5:130188395-130188796+	intron sense-overlapping	ENSMUST00000026390	Rabgef1	chr5:130187161-130214337+
chr13	54556328	54556651	MACS_peak_36820	253.65	323	ENSMUST00000143173	4833439L19Rik	253.65	3.51	32.43	Ensembl	874	chr13:54556194-54565291-	exon sense-overlapping	ENSMUST00000026989	4833439L19Rik	chr13:54551218-54565435-
chr4	130816844	130817161	MACS_peak_112316	252.5	317	ENSMUST00000146093	Sdc3	252.5	2.69	32.01	Ensembl	528	chr4:130792704-130817273+	exon sense-overlapping	ENSMUST00000070478	Sdc3	chr4:130792537-130826319+
chr2	120850055	120850435	MACS_peak_105146	251.37	380	ENSMUST00000141921	Ttbk2	251.37	7.62	24.03	Ensembl	850	chr2:120790340-120850435-	exon sense-overlapping	ENSMUST00000028740	Ttbk2	chr2:120732816-120850604-
chr9	14558458	14558987	MACS_peak_183116	249.25	529	ENSMUST00000161171	Amotl1	249.25	8.96	24.14	Ensembl	685	chr9:14555673-14559051-	exon sense-overlapping	ENSMUST00000013220	Amotl1	chr9:14541966-14615000-
chrX	162811291	162811892	MACS_peak_198687	248.67	601	ENSMUST00000131463	Txlng	248.67	9.13	24.19	Ensembl	5399	chrX:162778919-162812481-	exon sense-overlapping	ENSMUST00000041370	Txlng	chrX:162778919-162829454-
chr14	101919076	101919842	MACS_peak_59349	248.55	766	ENSMUST00000159154	Lmo7	248.55	7.1	24.22	Ensembl	3330	chr14:101919077-101930760+	exon sense-overlapping	ENSMUST00000100337	Lmo7	chr14:101729957-101934710+
chr3	8882237	8882570	MACS_peak_111693	248.37	333	ENSMUST00000122299	Gm15466	248.37	13.34	24.21	Ensembl	333	chr3:8882238-8882570-	intron sense-overlapping	ENSMUST00000042148	Mrps28	chr3:8802146-8923918-
chr2	32384632	32384942	MACS_peak_84947	248.24	310	ENSMUST00000147219	Lcn2	248.24	6.35	32.17	Ensembl	1374	chr2:32384633-32387722-	exon sense-overlapping	ENSMUST00000050785	Lcn2	chr2:32384633-32387797-
chr4	32762864	32763352	MACS_peak_122729	247.38	488	ENSMUST00000124361	Mdn1	247.38	8.49	24.29	Ensembl	597	chr4:32762865-32765217+	exon sense-overlapping	ENSMUST00000071642	Mdn1	chr4:32657119-32775207+
chr11	115586285	115588545	MACS_peak_34023	247.25	2260	ENSMUST00000154832	Gga3	247.25	7.09	24.28	Ensembl	4848	chr11:115584364-115589521-	exon sense-overlapping	ENSMUST00000019135	Gga3	chr11:115584255-115604051-
chr8	121797635	121798236	MACS_peak_156148	246.8	601	ENSMUST00000174709	Klhdc4	246.8	6.71	32.21	Ensembl	2834	chr8:121796333-121829540-	exon sense-overlapping	ENSMUST00000045884	Klhdc4	chr8:121796313-121829569-
chr17	33112752	33113164	MACS_peak_79946	246.58	412	uc008byb.2	Zfp955a	246.58	13.17	24.24	UCSC_knowngene	3298	chr17:33111726-33255145-	exon sense-overlapping	ENSMUST00000008830	Zfp955a	chr17:33241519-33255040-
chr4	149160505	149160953	MACS_peak_133195	244.54	448	ENSMUST00000137982	Pgd	244.54	6.92	24.28	Ensembl	687	chr4:149160293-149161654-	exon sense-overlapping	ENSMUST00000084124	Pgd	chr4:149149991-149166707-
chr10	94569719	94570160	MACS_peak_20946	244.37	441	ENSMUST00000146744	Gm16154	244.37	18.2	24.29	Ensembl	2913	chr10:94567828-94612084-	intronic antisense	ENSMUST00000065060	Tmcc3	chr10:94514857-94590956+
chr11	60114694	60115045	MACS_peak_27836	243.39	351	ENSMUST00000130746	4930412M03Rik	243.39	8.45	24.41	Ensembl	1111	chr11:60112219-60115230-	intronic antisense	ENSMUST00000064190	Rai1	chr11:60105013-60199195+
chrX	7773384	7775104	MACS_peak_148021	242.15	1720	ENSMUST00000143680	Tfe3	242.15	7.54	33.41	Ensembl	4717	chrX:7762697-7775201+	exon sense-overlapping	ENSMUST00000077680	Tfe3	chrX:7762658-7775202+
chr7	126797643	126798307	MACS_peak_129730	241.21	664	ENSMUST00000139657	Aldoa	241.21	4.1	33.44	Ensembl	1352	chr7:126795949-126798307-	exon sense-overlapping	ENSMUST00000032934	Aldoa	chr7:126795234-126799254-
chr16	13684890	13685398	MACS_peak_70169	240.13	508	ENSMUST00000144804	Bfar	240.13	8.81	24.6	Ensembl	659	chr16:13684891-13687541+	exon sense-overlapping	ENSMUST00000023365	Bfar	chr16:13671858-13703612+
chr1	168336961	168337319	MACS_peak_9541	239.67	358	uc007dlh.1	BC039791	239.67	8.03	32.29	UCSC_knowngene	1329	chr1:168335991-168337319-	intron sense-overlapping	ENSMUST00000064438	Pbx1	chr1:168158732-168431504-
chr5	125025651	125026087	MACS_peak_110745	239.65	436	ENSMUST00000130742	Ncor2	239.65	10	33.62	Ensembl	683	chr5:125025102-125026087-	exon sense-overlapping	ENSMUST00000055256	Ncor2	chr5:125017835-125124900-
chr6	6869308	6869661	MACS_peak_148436	239.01	353	ENSMUST00000159568	Dlx6os1	239.01	8.46	24.65	Ensembl	4605	chr6:6820546-6871592-	intronic antisense	ENSMUST00000031768	Dlx6	chr6:6863797-6867965+
chr7	45570348	45570942	MACS_peak_139591	237.38	594	ENSMUST00000142260	0610005C13Rik	237.38	14.64	32.42	Ensembl	2434	chr7:45569086-45575173-	intronic antisense	NM_001243052	Bcat2	chr7:45571279-45589710+
chr17	35138585	35138965	MACS_peak_80205	235.47	380	ENSMUST00000172889	Bag6	235.47	3.1	24.85	Ensembl	611	chr17:35136123-35138965+	exon sense-overlapping	ENSMUST00000025250	Bag6	chr17:35135178-35147322+
chr17	8801692	8802145	MACS_peak_77559	235.2	453	ENSMUST00000141877	Pde10a	235.2	9.54	24.81	Ensembl	782	chr17:8801693-8899189+	exon sense-overlapping	ENSMUST00000024647	Pde10a	chr17:8880426-8982367+
chr15	82987020	82987925	MACS_peak_66406	233.97	905	uc007wzr.1	AK140580	233.97	7.75	24.92	UCSC_knowngene	2200	chr15:82982870-82989134+	intergenic	NA	NA	NA
chr5	22745664	22746884	MACS_peak_135657	233.91	1220	NR_027362	A930003O13Rik	233.91	6.22	24.91	RefSeq	1964	chr5:22738911-22746884-	natural antisense	NM_001081231	Lhfpl3	chr5:22746193-23275597+
chr2	32377096	32378627	MACS_peak_98683	230.04	1531	ENSMUST00000146423	1110008P14Rik	230.04	5.35	25.14	Ensembl	2618	chr2:32377097-32381862-	exon sense-overlapping	ENSMUST00000048792	1110008P14Rik	chr2:32379101-32381938-
chr11	116134907	116135325	MACS_peak_29639	229.73	418	ENSMUST00000133159	Mrpl38	229.73	12.82	32.8	Ensembl	913	chr11:116132785-116138789-	exon sense-overlapping	ENSMUST00000106439	Mrpl38	chr11:116131817-116138868-
chr14	45529424	45529786	MACS_peak_47951	229.51	362	ENSMUST00000149723	Fermt2	229.51	9.09	32.78	Ensembl	421	chr14:45504672-45529786-	exon sense-overlapping	ENSMUST00000045905	Fermt2	chr14:45458792-45530118-
chr3	88451344	88451786	MACS_peak_116370	228.87	442	ENSMUST00000135732	Sema4a	228.87	13.67	25.22	Ensembl	713	chr3:88449824-88451786-	exon sense-overlapping	ENSMUST00000029700	Sema4a	chr3:88435959-88455739-
chr12	108178773	108179393	MACS_peak_37395	228.5	620	uc033gff.1	Ccnk	228.5	10.79	32.8	UCSC_knowngene	1205	chr12:108178774-108186622+	exon sense-overlapping	ENSMUST00000101055	Ccnk	chr12:108179738-108203359+
chr2	104207900	104208209	MACS_peak_103842	228.4	309	ENSMUST00000149165	D430041D05Rik	228.4	4.9	25.27	Ensembl	4291	chr2:104207666-104257984-	exon sense-overlapping	ENSMUST00000089726	D430041D05Rik	chr2:104143073-104410334-
chr7	27537579	27537940	MACS_peak_122897	228.39	361	ENSMUST00000142981	Pld3	228.39	7.66	35.06	Ensembl	859	chr7:27533454-27537940-	exon sense-overlapping	ENSMUST00000117095	Pld3	chr7:27532000-27553212-
chr11	97574916	97575226	MACS_peak_27631	225.34	310	ENSMUST00000142123	Srcin1	225.34	11.8	32.97	Ensembl	399	chr11:97551890-97575226-	exon sense-overlapping	ENSMUST00000107590	Srcin1	chr11:97517675-97573944-
chr2	132100005	132100843	MACS_peak_91222	224.73	838	ENSMUST00000121434	Gm14052	224.73	16.19	32.98	Ensembl	1031	chr2:132099869-132100899+	intronic antisense	ENSMUST00000028815	Slc23a2	chr2:132052496-132145108-
chr4	107031014	107031351	MACS_peak_97412	223.18	337	ENSMUST00000131111	Ssbp3	223.18	5.16	35.55	Ensembl	568	chr4:107030832-107031485+	exon sense-overlapping	ENSMUST00000030367	Ssbp3	chr4:106911470-107049694+
chr7	44849343	44850006	MACS_peak_162060	222.62	663	ENSMUST00000152091	Akt1s1	222.62	5.19	25.52	Ensembl	2207	chr7:44849344-44855417+	exon sense-overlapping	ENSMUST00000054343	Akt1s1	chr7:44849224-44855421+
chr6	136827643	136828338	MACS_peak_121002	220.01	695	uc009emh.1	AK044622	220.01	9.37	35.91	UCSC_knowngene	1706	chr6:136827644-136829349+	exon sense-overlapping	ENSMUST00000052702	BC049715	chr6:136828843-136840536+
chr12	64786440	64787095	MACS_peak_39119	219.78	655	ENSMUST00000167639	Gm6395	219.78	8.95	25.69	Ensembl	1491	chr12:64786192-64787683+	intergenic	NA	NA	NA
chr9	92541772	92542766	MACS_peak_190120	219.65	994	NR_029474	B430319G15Rik	219.65	10.31	25.68	RefSeq	4069	chr9:92538801-92542869-	natural antisense	ENSMUST00000070522	Plod2	chr9:92542223-92608428+
chr11	32097175	32097572	MACS_peak_25340	219.05	397	NR_130637	Gm12108	219.05	15.43	25.64	RefSeq	2609	chr11:32095259-32101228-	intergenic	NA	NA	NA
chr11	61492903	61494266	MACS_peak_21173	218.88	1363	ENSMUST00000128478	Mapk7	218.88	4.67	36.1	Ensembl	4238	chr11:61488812-61494266-	exon sense-overlapping	ENSMUST00000079080	Mapk7	chr11:61488812-61494296-
chr1	63445890	63446412	MACS_peak_3512	218.6	522	ENSMUST00000114103	Adam23	218.6	5.12	33.63	Ensembl	2889	chr1:63445891-63573217+	exon sense-overlapping	ENSMUST00000087374	Adam23	chr1:63445895-63596276+
chr17	70996109	70996895	MACS_peak_63288	218.13	786	ENSMUST00000126529	Myl12a	218.13	5.02	36.1	Ensembl	1335	chr17:70994294-71002165-	exon sense-overlapping	ENSMUST00000024846	Myl12a	chr17:70994294-70998012-
chr2	132808212	132808992	MACS_peak_91286	217.35	780	ENSMUST00000152836	Trmt6	217.35	7.32	33.65	Ensembl	4153	chr2:132804207-132810635-	exon sense-overlapping	ENSMUST00000039554	Trmt6	chr2:132804207-132816054-
chr3	95848914	95849569	MACS_peak_100360	216.55	655	ENSMUST00000160155	Prpf3	216.55	15.65	33.42	Ensembl	2548	chr3:95830618-95849574-	exon sense-overlapping	ENSMUST00000015892	Prpf3	chr3:95830124-95855885-
chr7	3421664	3422584	MACS_peak_159405	215.31	920	NR_126426	3300002P13Rik	215.31	12.65	25.94	RefSeq	1092	chr7:3421665-3423445-	bidirectional	ENSMUST00000183200	Cacng6	chr7:3424195-3435667+
chr3	127016622	127017013	MACS_peak_102108	215.12	391	ENSMUST00000183097	Ank2	215.12	3.34	33.53	Ensembl	2668	chr3:127015303-127024248-	exon sense-overlapping	ENSMUST00000182064	Ank2	chr3:126923325-127225932-
chr5	40328464	40329427	MACS_peak_118514	213.66	963	ENSMUST00000118681	Gm2810	213.66	17.34	33.58	Ensembl	990	chr5:40328438-40329427+	intergenic	NA	NA	NA
chr19	42171545	42171937	MACS_peak_81019	213.18	392	ENSMUST00000166788	Zfyve27	213.18	10.45	33.64	Ensembl	1747	chr19:42170700-42173206+	exon sense-overlapping	ENSMUST00000099443	Zfyve27	chr19:42170594-42191717+
chr4	49059272	49059617	MACS_peak_106737	212.44	345	ENSMUST00000137884	E130309F12Rik	212.44	7.41	33.63	Ensembl	2558	chr4:49059273-49208600+	exon sense-overlapping	ENSMUST00000076670	E130309F12Rik	chr4:49059282-49340259+
chr4	136608839	136609433	MACS_peak_131729	211.81	594	ENSMUST00000119037	Gm12986	211.81	13.46	26.08	Ensembl	967	chr4:136608840-136609806-	bidirectional	ENSMUST00000046647	4930549C01Rik	chr4:136610437-136613226+
chr9	90270351	90270771	MACS_peak_163817	211.18	420	ENSMUST00000128874	Tbc1d2b	211.18	13.55	33.71	Ensembl	3475	chr9:90238278-90270771-	exon sense-overlapping	ENSMUST00000041767	Tbc1d2b	chr9:90202047-90270769-
chr6	6351303	6352041	MACS_peak_148391	210.5	738	ENSMUST00000181363	Gm8652	210.5	12.52	26.13	Ensembl	964	chr6:6351304-6352267-	intergenic	NA	NA	NA
chr17	46430781	46431205	MACS_peak_80670	210.41	424	ENSMUST00000164180	Crip3	210.41	15.83	26.12	Ensembl	943	chr17:46428942-46431577+	exon sense-overlapping	ENSMUST00000024764	Crip3	chr17:46428942-46431771+
chr7	143053036	143053686	MACS_peak_130904	210.26	650	NR_015529	R74862	210.26	5.1	36.7	RefSeq	2219	chr7:143032621-143053686-	natural antisense	ENSMUST00000037941	Cd81	chr7:143052739-143067934+
chr15	84787064	84787467	MACS_peak_57123	208.41	403	uc007xcl.2	BC048859	208.41	16.38	33.95	UCSC_knowngene	4578	chr15:84785377-84789954-	exon sense-overlapping	ENSMUST00000016768	Phf21b	chr15:84785381-84855110-
chr15	83581766	83582239	MACS_peak_66488	208.37	473	ENSMUST00000134334	Ttll12	208.37	4.89	26.16	Ensembl	709	chr15:83581767-83586892-	exon sense-overlapping	ENSMUST00000016901	Ttll12	chr15:83575644-83595157-
chr18	23804024	23804755	MACS_peak_65275	204.23	731	uc008egg.1	AK088734	204.23	7.4	37.41	UCSC_knowngene	2035	chr18:23804025-23806059+	exon sense-overlapping	ENSMUST00000025127	Mapre2	chr18:23803984-23893857+
chr3	36000362	36000711	MACS_peak_113568	203.99	349	NR_029456	Mccc1os	203.99	9.26	26.32	RefSeq	4451	chr3:35999913-36008828+	natural antisense	ENSMUST00000029259	Mccc1	chr3:35959839-36000678-
chr7	126429427	126429785	MACS_peak_129684	203.84	358	ENSMUST00000150933	Rabep2	203.84	8.07	37.4	Ensembl	623	chr7:126429428-126438407+	exon sense-overlapping	ENSMUST00000106405	Rabep2	chr7:126429440-126445901+
chr2	143956397	143956860	MACS_peak_81919	203.52	463	ENSMUST00000155539	Rrbp1	203.52	10.5	37.34	Ensembl	569	chr2:143956383-143957645-	exon sense-overlapping	ENSMUST00000016072	Rrbp1	chr2:143947395-144011263-
chr2	152323115	152324440	MACS_peak_92640	203.04	1325	ENSMUST00000128645	Rbck1	203.04	8.36	34.08	Ensembl	1595	chr2:152322938-152324616-	exon sense-overlapping	ENSMUST00000028964	Rbck1	chr2:152316334-152332653-
chr10	80333965	80334323	MACS_peak_16402	202.32	358	ENSMUST00000153167	Reep6	202.32	9.88	34.09	Ensembl	848	chr10:80330198-80334432+	exon sense-overlapping	ENSMUST00000040081	Reep6	chr10:80330202-80335582+
chr19	6407978	6409124	MACS_peak_78839	202.06	1146	ENSMUST00000152022	Rasgrp2	202.06	10.55	34.14	Ensembl	8815	chr19:6404827-6414041+	exon sense-overlapping	ENSMUST00000035716	Rasgrp2	chr19:6400562-6415216+
chr13	51202632	51203066	MACS_peak_41038	201.8	434	uc029sbd.1	H2A	201.8	13.49	34.15	UCSC_knowngene	434	chr13:51202633-51203066-	exon sense-overlapping	ENSMUST00000091708	Hist1h2al	chr13:51202688-51203065-
chr18	66269633	66270193	MACS_peak_89224	200.79	560	ENSMUST00000151343	Ccbe1	200.79	17.41	26.4	Ensembl	1836	chr18:66269028-66302739-	exon sense-overlapping	ENSMUST00000130300	Ccbe1	chr18:66060967-66291838-
chr6	54429320	54430049	MACS_peak_152063	198.65	729	NR_033635	9130019P16Rik	198.65	13.85	26.54	RefSeq	4486	chr6:54269681-54430221-	intronic antisense	ENSMUST00000059138	Prr15	chr6:54327012-54330200+
chr11	121298515	121298855	MACS_peak_35163	198.57	340	ENSMUST00000151492	Foxk2	198.57	5.52	26.55	Ensembl	607	chr11:121298516-121299850+	exon sense-overlapping	ENSMUST00000106113	Foxk2	chr11:121259990-121309896+
chr11	48753023	48753770	MACS_peak_26639	197.91	747	ENSMUST00000179599	Gm12183	197.91	7.88	26.61	Ensembl	2011	chr11:48751760-48753770-	intergenic	NA	NA	NA
chr1	161725857	161726673	MACS_peak_9062	197.53	816	ENSMUST00000180320	Gm15429	197.53	20.51	34.6	Ensembl	2030	chr1:161725536-161727682-	intergenic	NA	NA	NA
chr4	119241481	119241804	MACS_peak_129414	197.07	323	ENSMUST00000136278	Lepre1	197.07	15.04	26.64	Ensembl	2750	chr4:119232954-119248369+	exon sense-overlapping	ENSMUST00000030393	Lepre1	chr4:119232939-119248975+
chr3	68902266	68902758	MACS_peak_98803	196.34	492	ENSMUST00000177308	Gm18588	196.34	12.01	34.48	Ensembl	492	chr3:68902267-68902758-	intron sense-overlapping	ENSMUST00000029347	Ift80	chr3:68892525-68994537-
chr17	35935625	35935963	MACS_peak_80269	196.32	338	ENSMUST00000056786	Gm9840	196.32	11.84	26.62	Ensembl	502	chr17:35935462-35935963-	intergenic	NA	NA	NA
chr9	13431617	13432740	MACS_peak_182937	195.94	1123	NR_028271	Phxr4	195.94	10.59	26.65	RefSeq	1391	chr9:13431361-13432740+	exon sense-overlapping	ENSMUST00000071254	Phxr4	chr9:13431361-13432736+
chr4	130009875	130010394	MACS_peak_112192	195.85	519	ENSMUST00000149282	Bai2	195.85	6.57	34.55	Ensembl	711	chr4:130009876-130011866+	exon sense-overlapping	ENSMUST00000030571	Bai2	chr4:129992069-130022338+
chr5	125304194	125304536	MACS_peak_124610	194.56	342	ENSMUST00000123338	Scarb1	194.56	7.88	34.59	Ensembl	813	chr5:125297319-125304542-	exon sense-overlapping	ENSMUST00000086075	Scarb1	chr5:125277087-125341094-
chr1	153229041	153229370	MACS_peak_9704	193.98	329	ENSMUST00000160515	Lamc1	193.98	5.71	26.62	Ensembl	466	chr1:153228761-153229418-	exon sense-overlapping	ENSMUST00000027752	Lamc1	chr1:153218922-153332786-
chr11	30572790	30573131	MACS_peak_25208	192.39	341	ENSMUST00000121523	Gm12097	192.39	14.25	26.61	Ensembl	1414	chr11:30572791-30574454-	intron sense-overlapping	ENSMUST00000074613	Acyp2	chr11:30505991-30649587-
chr8	111045526	111045867	MACS_peak_179847	190.34	341	ENSMUST00000142770	Aars	190.34	3.69	26.63	Ensembl	4187	chr8:111033916-111046743+	exon sense-overlapping	ENSMUST00000034441	Aars	chr8:111033902-111057664+
chr8	32476882	32477329	MACS_peak_174158	189.98	447	ENSMUST00000084017	Gm5908	189.98	8.03	26.65	Ensembl	447	chr8:32476883-32477329-	intergenic	NA	NA	NA
chr4	124940930	124941495	MACS_peak_111435	188.43	565	ENSMUST00000160420	9930104L06Rik	188.43	10.6	35.2	Ensembl	4749	chr4:124937065-124944655+	exon sense-overlapping	NM_177573	9930104L06Rik	chr4:124937048-124944661+
chr11	117817101	117817424	MACS_peak_34365	186.86	323	ENSMUST00000153872	Tk1	186.86	15.96	26.82	Ensembl	678	chr11:117815905-117817424-	exon sense-overlapping	ENSMUST00000026661	Tk1	chr11:117815526-117826092-
chr8	117211872	117212269	MACS_peak_180378	186.54	397	ENSMUST00000182761	Gm20204	186.54	6.02	26.87	Ensembl	5220	chr8:117210778-117215997+	intergenic	NA	NA	NA
chr15	36597972	36598312	MACS_peak_53717	184.37	340	ENSMUST00000146577	Pabpc1	184.37	4.44	35.31	Ensembl	725	chr15:36596024-36598312-	exon sense-overlapping	ENSMUST00000001809	Pabpc1	chr15:36595661-36608973-
chr5	65420724	65421188	MACS_peak_119670	183.51	464	ENSMUST00000125375	Ugdh	183.51	12.67	35.38	Ensembl	3720	chr5:65413224-65422660-	exon sense-overlapping	ENSMUST00000031103	Ugdh	chr5:65413221-65435946-
chr11	45829318	45829869	MACS_peak_22658	182.58	551	ENSMUST00000121695	Gm12164	182.58	6.29	35.5	Ensembl	551	chr11:45829319-45829869+	intergenic	NA	NA	NA
chr5	140712504	140713172	MACS_peak_146977	182.43	668	ENSMUST00000124892	Brat1	182.43	15.04	26.76	Ensembl	3179	chr5:140705052-140715659+	exon sense-overlapping	ENSMUST00000041588	Brat1	chr5:140705011-140719379+
chr2	103775416	103775765	MACS_peak_103809	182.36	349	ENSMUST00000137390	Caprin1	182.36	5.42	26.75	Ensembl	570	chr2:103773001-103776008-	exon sense-overlapping	ENSMUST00000028607	Caprin1	chr2:103762941-103797649-
chr7	29370787	29371239	MACS_peak_123165	182.23	452	ENSMUST00000182529	Sipa1l3	182.23	9.21	40.21	Ensembl	702	chr7:29370788-29377745-	exon sense-overlapping	ENSMUST00000085809	Sipa1l3	chr7:29320378-29505460-
chr1	56971468	56973824	MACS_peak_3046	181.9	2356	NR_024325	9130024F11Rik	181.9	6.84	35.47	RefSeq	3728	chr1:56971469-56975196+	natural antisense	ENSMUST00000042857	Satb2	chr1:56793989-56972502-
chr3	97216070	97216625	MACS_peak_89175	181.75	555	ENSMUST00000141861	Bcl9	181.75	4.94	40.16	Ensembl	2500	chr3:97214484-97228330-	exon sense-overlapping	ENSMUST00000046521	Bcl9	chr3:97203662-97227364-
chr12	108806238	108806641	MACS_peak_33335	180.46	403	ENSMUST00000126912	Yy1	180.46	8.43	40.27	Ensembl	715	chr12:108806239-108815564+	exon sense-overlapping	ENSMUST00000021692	Yy1	chr12:108792973-108816632+
chr2	30825258	30825761	MACS_peak_98425	180.26	503	ENSMUST00000144330	Asb6	180.26	7.91	26.9	Ensembl	1000	chr2:30825156-30828291-	exon sense-overlapping	ENSMUST00000041726	Asb6	chr2:30823097-30830333-
chr7	4752060	4752528	MACS_peak_121808	180.19	468	ENSMUST00000182272	Cox6b2	180.19	5.3	40.27	Ensembl	519	chr7:4751925-4752528-	exon sense-overlapping	ENSMUST00000063324	Cox6b2	chr7:4751792-4753094-
chrX	95950935	95951292	MACS_peak_168937	180.19	357	ENSMUST00000139717	Las1l	180.19	7.44	35.7	Ensembl	4625	chrX:95949435-95956962-	exon sense-overlapping	ENSMUST00000079987	Las1l	chrX:95935335-95956913-
chr15	81857631	81858323	MACS_peak_56711	180.08	692	uc007wxn.1	AK044623	180.08	7.76	35.71	UCSC_knowngene	2590	chr15:81855734-81858323-	exon sense-overlapping	ENSMUST00000039199	Tob2	chr15:81857674-81858796-
chr7	28767253	28767678	MACS_peak_138471	179.85	425	ENSMUST00000155327	Sirt2	179.85	7.14	35.72	Ensembl	2117	chr7:28767254-28788660+	exon sense-overlapping	ENSMUST00000072965	Sirt2	chr7:28766767-28788660+
chr17	85615212	85615743	MACS_peak_72065	179.69	531	ENSMUST00000176556	Six3os1	179.69	10.32	35.74	Ensembl	4094	chr17:85611238-85618385-	natural antisense	ENSMUST00000176081	Six3	chr17:85613608-85624140+
chr2	153393362	153393787	MACS_peak_108154	179.43	425	ENSMUST00000138571	Asxl1	179.43	6.49	26.95	Ensembl	717	chr2:153392860-153396837+	exon sense-overlapping	ENSMUST00000109790	Asxl1	chr2:153345845-153404007+
chr4	129600701	129601243	MACS_peak_112141	179.38	542	ENSMUST00000174350	Tmem234	179.38	5.39	35.71	Ensembl	1124	chr4:129600702-129607877+	exon sense-overlapping	ENSMUST00000102591	Tmem234	chr4:129600680-129608528+
chr15	89520914	89521559	MACS_peak_57650	177.53	645	ENSMUST00000155610	Gm15609	177.53	6.69	35.48	Ensembl	2960	chr15:89520096-89523677-	natural antisense	ENSMUST00000039074	Shank3	chr15:89499857-89560261+
chr5	104498462	104499500	MACS_peak_121901	176.76	1038	ENSMUST00000133540	Pkd2	176.76	7.4	35.54	Ensembl	5130	chr5:104492771-104501349+	exon sense-overlapping	ENSMUST00000086831	Pkd2	chr5:104459450-104505819+
chr2	72978897	72979286	MACS_peak_87631	176	389	ENSMUST00000133615	Sp3	176	7.86	35.6	Ensembl	3870	chr2:72936652-72979286-	exon sense-overlapping	ENSMUST00000066003	Sp3	chr2:72936648-72980426-
chr7	62190716	62191201	MACS_peak_163761	175.77	485	uc009hfe.1	AK086712	175.77	8.47	27.28	UCSC_knowngene	3054	chr7:62094506-62209530-	intergenic	NA	NA	NA
chr1	47365643	47366366	MACS_peak_3123	175.15	723	ENSMUST00000121202	Gm4852	175.15	16.1	27.14	Ensembl	729	chr1:47365644-47366372-	intergenic	NA	NA	NA
chr11	70652611	70653555	MACS_peak_21918	174.61	944	ENSMUST00000177669	Pfn1	174.61	5.57	41.07	Ensembl	1997	chr11:70652612-70654608-	exon sense-overlapping	ENSMUST00000018437	Pfn1	chr11:70651850-70654644-
chr12	84326277	84327051	MACS_peak_41195	174.18	774	uc007oeu.2	Zfp410	174.18	11.12	27.13	UCSC_knowngene	2993	chr12:84316859-84327687+	exon sense-overlapping	ENSMUST00000045931	Zfp410	chr12:84316859-84343830+
chr4	41663539	41664034	MACS_peak_123438	174.13	495	ENSMUST00000151181	Cntfr	174.13	6.43	27.14	Ensembl	596	chr4:41663268-41664034-	exon sense-overlapping	ENSMUST00000102961	Cntfr	chr4:41657498-41695442-
chr15	79247276	79248296	MACS_peak_65835	173.74	1020	ENSMUST00000171581	Pick1	173.74	8.64	27.15	Ensembl	1944	chr15:79246335-79249466+	exon sense-overlapping	ENSMUST00000018295	Pick1	chr15:79229382-79249466+
chr11	3220243	3221482	MACS_peak_23487	173.66	1239	ENSMUST00000125224	Eif4enif1	173.66	5.58	27.16	Ensembl	2546	chr11:3202663-3222331+	exon sense-overlapping	ENSMUST00000020734	Eif4enif1	chr11:3202392-3244581+
chr9	50774878	50775520	MACS_peak_142642	173.53	642	ENSMUST00000176894	1110032A03Rik	173.53	13.56	41.18	Ensembl	2761	chr9:50763727-50775520-	exon sense-overlapping	ENSMUST00000042468	1110032A03Rik	chr9:50762828-50768452-
chr6	34685962	34686521	MACS_peak_114930	173.39	559	ENSMUST00000155714	Cald1	173.39	7.08	41.18	Ensembl	1422	chr6:34598544-34687173+	exon sense-overlapping	ENSMUST00000079391	Cald1	chr6:34598500-34775454+
chr10	81640027	81640812	MACS_peak_19479	173.05	785	ENSMUST00000123993	Ankrd24	173.05	7.23	27.2	Ensembl	3161	chr10:81633699-81643023+	exon sense-overlapping	ENSMUST00000119336	Ankrd24	chr10:81628635-81647610+
chr9	115281201	115281864	MACS_peak_192466	172.89	663	NR_029430	Stmn1-rs1	172.89	14.97	27.18	RefSeq	979	chr9:115281092-115282070-	intron sense-overlapping	ENSMUST00000035010	Stt3b	chr9:115242607-115310421-
chr4	118621081	118621662	MACS_peak_110802	172.73	581	ENSMUST00000149837	Ebna1bp2	172.73	7.33	35.7	Ensembl	729	chr4:118620850-118621662+	exon sense-overlapping	ENSMUST00000030501	Ebna1bp2	chr4:118620799-118627776+
chr5	91962388	91962978	MACS_peak_121066	170.22	590	uc008ybz.1	Thap6	170.22	6.03	35.95	UCSC_knowngene	1337	chr5:91962389-91966598+	natural antisense	ENSMUST00000031345	Rchy1	chr5:91948904-91963068-
chr2	22588102	22589647	MACS_peak_74362	170.15	1545	ENSMUST00000117219	Gm13340	170.15	6.04	41.4	Ensembl	1545	chr2:22588103-22589647-	intronic antisense	ENSMUST00000044749	Myo3a	chr2:22227503-22618252+
chr11	69969240	69969588	MACS_peak_28828	169.12	348	ENSMUST00000127437	Elp5	169.12	4.58	27.36	Ensembl	674	chr11:69969241-69980061-	exon sense-overlapping	ENSMUST00000108594	Elp5	chr11:69968224-69981252-
chr12	32825680	32826082	MACS_peak_32478	168.56	402	NR_045032	Gdap10	168.56	15.65	35.68	RefSeq	2815	chr12:32824116-32826908+	intron sense-overlapping	ENSMUST00000020886	Nampt	chr12:32820335-32853369+
chr9	118049896	118050220	MACS_peak_166029	168.45	324	ENSMUST00000143024	Azi2	168.45	8.76	35.66	Ensembl	943	chr9:118040687-118050220+	exon sense-overlapping	ENSMUST00000044454	Azi2	chr9:118040499-118063839+
chr16	16886879	16887359	MACS_peak_70456	168.21	480	ENSMUST00000128497	Top3b	168.21	8.96	27.39	Ensembl	947	chr16:16886644-16887710+	exon sense-overlapping	ENSMUST00000023465	Top3b	chr16:16870781-16892990+
chrX	134718369	134718818	MACS_peak_169786	167.05	449	ENSMUST00000129697	Armcx1	167.05	9.07	35.77	Ensembl	906	chrX:134717988-134719313+	exon sense-overlapping	ENSMUST00000035748	Armcx1	chrX:134717989-134721917+
chr3	138443169	138443554	MACS_peak_91006	166.89	385	ENSMUST00000160201	Adh5	166.89	6.21	42	Ensembl	733	chr3:138443170-138447939+	exon sense-overlapping	ENSMUST00000005964	Adh5	chr3:138443093-138455499+
chr2	3504526	3506147	MACS_peak_96060	166.14	1621	ENSMUST00000124331	Hspa14	166.14	10.9	27.37	Ensembl	4314	chr2:3504527-3512757-	exon sense-overlapping	ENSMUST00000027961	Hspa14	chr2:3488850-3512814-
chr19	6083948	6084307	MACS_peak_69844	165.42	359	ENSMUST00000160357	Zfpl1	165.42	6.58	42.2	Ensembl	698	chr19:6082256-6084307-	exon sense-overlapping	ENSMUST00000025707	Zfpl1	chr19:6080762-6084943-
chr2	59347923	59348240	MACS_peak_100772	165.34	317	ENSMUST00000124127	Pkp4	165.34	4.56	27.44	Ensembl	661	chr2:59342197-59348256+	exon sense-overlapping	ENSMUST00000037903	Pkp4	chr2:59161008-59355208+
chr16	20392450	20392927	MACS_peak_61005	164.19	477	ENSMUST00000134413	Abcc5	164.19	8.76	36.16	Ensembl	4875	chr16:20331308-20399621-	exon sense-overlapping	ENSMUST00000077867	Abcc5	chr16:20392675-20425986-
chr15	60828120	60828524	MACS_peak_64263	164.11	404	NR_030696	9930014A18Rik	164.11	8.41	27.63	RefSeq	5130	chr15:60822965-60831400+	natural antisense	ENSMUST00000100635	Fam84b	chr15:60818996-60825080-
chrX	103525929	103526330	MACS_peak_169222	162.87	401	ENSMUST00000062642	Gm9785	162.87	9.27	36.21	Ensembl	1006	chrX:103525325-103526330-	intergenic	NA	NA	NA
chr7	45702832	45703134	MACS_peak_162204	162.1	302	ENSMUST00000137294	Car11	162.1	4.98	27.76	Ensembl	858	chr7:45701016-45703477+	exon sense-overlapping	ENSMUST00000003360	Car11	chr7:45699843-45704682+
chr9	106474396	106474868	MACS_peak_164899	160.96	472	ENSMUST00000145396	Parp3	160.96	6.59	36.45	Ensembl	2246	chr9:106470989-106476169-	exon sense-overlapping	ENSMUST00000067218	Parp3	chr9:106470322-106476949-
chr12	3238028	3239477	MACS_peak_27314	160.55	1449	ENSMUST00000178074	1700012B15Rik	160.55	6.56	43.08	Ensembl	4006	chr12:3235504-3241410+	intergenic	NA	NA	NA
chr14	25548959	25550238	MACS_peak_53989	159.24	1279	ENSMUST00000180466	Gm26772	159.24	8.17	27.89	Ensembl	3429	chr14:25548390-25554369-	intronic antisense	ENSMUST00000007961	Zmiz1	chr14:25459267-25664719+
chr5	133475094	133475587	MACS_peak_111546	159.21	493	ENSMUST00000077628	Gm10051	159.21	5.1	43.49	Ensembl	493	chr5:133475095-133475587+	intergenic	NA	NA	NA
chr11	51586339	51587317	MACS_peak_26915	158.55	978	ENSMUST00000164864	Phykpl	158.55	13	28.05	Ensembl	1877	chr11:51584807-51587317+	exon sense-overlapping	ENSMUST00000020625	Phykpl	chr11:51584789-51601328+
chr16	24393353	24393655	MACS_peak_71145	157.42	302	NR_037954	1110054M08Rik	157.42	11.62	27.89	RefSeq	876	chr16:24392556-24393655-	natural antisense	ENSMUST00000038053	Lpp	chr16:24393350-24992576+
chr1	171275989	171276760	MACS_peak_11446	156.9	771	ENSMUST00000155083	Ppox	156.9	5.4	27.93	Ensembl	4411	chr1:171275990-171281186-	exon sense-overlapping	ENSMUST00000073120	Ppox	chr1:171276992-171281186-
chr4	149364630	149365078	MACS_peak_114320	156.28	448	uc008vwf.1	AK020898	156.28	10.11	36.51	UCSC_knowngene	1286	chr4:149347885-149365277+	natural antisense	ENSMUST00000103212	Ube4b	chr4:149328416-149426749-
chr7	16184089	16184718	MACS_peak_122155	155.84	629	ENSMUST00000176714	Meis3	155.84	6.17	44.02	Ensembl	1153	chr7:16184090-16186510+	exon sense-overlapping	ENSMUST00000002495	Meis3	chr7:16175430-16186504+
chr7	96436759	96437508	MACS_peak_166714	155.81	749	ENSMUST00000129445	Tenm4	155.81	5.88	28.06	Ensembl	2527	chr7:96210146-96438966+	exon sense-overlapping	ENSMUST00000107162	Tenm4	chr7:96171244-96911093+
chr9	44374638	44375178	MACS_peak_142121	155.28	540	ENSMUST00000075585	Gm10080	155.28	11.44	44.03	Ensembl	613	chr9:44374595-44375209-	intergenic	NA	NA	NA
chr4	48344283	48345230	MACS_peak_94522	155.07	947	ENSMUST00000118949	Gm12435	155.07	7.48	44.08	Ensembl	1016	chr4:48344215-48345230-	intronic antisense	ENSMUST00000030029	Invs	chr4:48279802-48431954+
chr4	27867148	27867635	MACS_peak_105015	154.28	487	ENSMUST00000117094	Gm11914	154.28	13.57	36.94	Ensembl	507	chr4:27867149-27867655-	intergenic	NA	NA	NA
chr1	192150247	192151025	MACS_peak_13156	154.03	778	NR_033536	Gm10516	154.03	16.62	28.16	RefSeq	2612	chr1:192136898-192151025+	intronic antisense	ENSMUST00000073279	Rcor3	chr1:192098656-192138010-
chr4	99929326	99929813	MACS_peak_96630	153.72	487	ENSMUST00000123830	Itgb3bp	153.72	5.41	44.17	Ensembl	3387	chr4:99765902-99929813-	exon sense-overlapping	ENSMUST00000146258	Itgb3bp	chr4:99765402-99829186-
chr6	46529350	46529659	MACS_peak_115679	153.29	309	ENSMUST00000114639	Rbpsuh-rs3	153.29	14.32	44.25	Ensembl	1464	chr6:46529351-46530922-	intronic antisense	ENSMUST00000114641	Cntnap2	chr6:45060061-47301369+
chr2	14189608	14189938	MACS_peak_83358	151.16	330	ENSMUST00000120155	Gm13320	151.16	9.51	37.45	Ensembl	330	chr2:14189609-14189938-	intronic antisense	ENSMUST00000077517	Tmem236	chr2:14174524-14221971+
chr7	34229099	34230236	MACS_peak_123394	150.7	1137	ENSMUST00000180864	Gm26762	150.7	6.8	44.54	Ensembl	5284	chr7:34224755-34230236+	natural antisense	ENSMUST00000038027	Gpi1	chr7:34202122-34230281-
chr4	44138465	44138831	MACS_peak_123933	150.55	366	ENSMUST00000152216	Rnf38	150.55	6.57	28.49	Ensembl	561	chr4:44138466-44139666-	exon sense-overlapping	ENSMUST00000045793	Rnf38	chr4:44126215-44168339-
chr17	45441471	45442171	MACS_peak_69325	150.55	700	NR_130960	B230354K17Rik	150.55	11.5	36.7	RefSeq	4918	chr17:45433831-45442544+	bidirectional	ENSMUST00000024727	Cdc5l	chr17:45391892-45433707-
chr14	118114877	118115183	MACS_peak_60087	150.28	306	ENSMUST00000180772	Gm26773	150.28	9.5	28.28	Ensembl	2868	chr14:118107831-118117100+	natural antisense	ENSMUST00000022727	Tgds	chr14:118111911-118132765-
chr5	121571823	121572181	MACS_peak_110158	149.84	358	ENSMUST00000133033	Aldh2	149.84	6.32	44.6	Ensembl	1035	chr5:121571472-121575127-	exon sense-overlapping	ENSMUST00000031411	Aldh2	chr5:121566027-121593824-
chr2	155985818	155986331	MACS_peak_82894	149.46	513	ENSMUST00000149905	Cep250	149.46	6.17	44.76	Ensembl	4930	chr2:155956458-155986613+	exon sense-overlapping	ENSMUST00000039994	Cep250	chr2:155956558-155998900+
chr8	83666552	83668467	MACS_peak_153194	148.43	1915	uc009mks.2	BC049805	148.43	5.05	36.89	UCSC_knowngene	1935	chr8:83666533-83668467-	natural antisense	ENSMUST00000019608	Ptger1	chr8:83666863-83672753+
chr7	130353442	130354010	MACS_peak_170145	148.4	568	ENSMUST00000121836	Gm5903	148.4	11.22	28.26	Ensembl	2325	chr7:130352038-130354362-	intron sense-overlapping	ENSMUST00000124096	Fgfr2	chr7:130162451-133123350-
chr11	74867428	74867745	MACS_peak_22223	147.36	317	ENSMUST00000156287	Sgsm2	147.36	5.14	44.98	Ensembl	706	chr11:74867429-74869092-	exon sense-overlapping	ENSMUST00000057631	Sgsm2	chr11:74849261-74897060-
chr17	29572636	29573098	MACS_peak_60708	147.33	462	ENSMUST00000160114	Tbc1d22b	147.33	6.32	44.96	Ensembl	3315	chr17:29572423-29606894+	exon sense-overlapping	ENSMUST00000048677	Tbc1d22b	chr17:29549788-29606895+
chr4	147187707	147188465	MACS_peak_132933	146.49	758	ENSMUST00000118508	Gm13146	146.49	6.07	28.58	Ensembl	780	chr4:147187708-147188487+	intron sense-overlapping	NM_001039209	Gm13152	chr4:147175866-147513420+
chr3	87527671	87528304	MACS_peak_88349	146.32	633	ENSMUST00000152010	Etv3	146.32	7.04	45.01	Ensembl	3819	chr3:87525618-87531034+	exon sense-overlapping	ENSMUST00000117293	Etv3	chr3:87525614-87531031+
chr8	122735737	122736055	MACS_peak_156311	146.3	318	uc009nto.1	AK032654	146.3	9.65	37.14	UCSC_knowngene	3344	chr8:122724948-122738511-	intronic antisense	ENSMUST00000127664	Gm20388	chr8:119910841-124345722+
chr8	3508683	3509220	MACS_peak_131168	146.11	537	ENSMUST00000162797	Mcoln1	146.11	4.32	44.98	Ensembl	2445	chr8:3505779-3515232+	exon sense-overlapping	ENSMUST00000004683	Mcoln1	chr8:3500457-3515232+
chr7	49556128	49556730	MACS_peak_162712	146.04	602	uc012flb.1	AK088944	146.04	6.49	28.58	UCSC_knowngene	2839	chr7:49553892-49556730+	exon sense-overlapping	ENSMUST00000064395	Nav2	chr7:49246189-49610087+
chrX	50325656	50326532	MACS_peak_194744	145.54	876	ENSMUST00000117176	Gm7803	145.54	9.04	28.62	Ensembl	1015	chrX:50325518-50326532-	intergenic	NA	NA	NA
chr17	14959187	14959570	MACS_peak_78148	145.24	383	ENSMUST00000174163	1600012H06Rik	145.24	7.05	28.62	Ensembl	772	chr17:14943271-14959570+	exon sense-overlapping	ENSMUST00000052691	1600012H06Rik	chr17:14943184-14945936+
chr8	94405210	94405788	MACS_peak_154072	144.77	578	ENSMUST00000178107	Ap3s1-ps2	144.77	15.95	37.33	Ensembl	582	chr8:94405211-94405792+	intergenic	NA	NA	NA
chr5	135783304	135783668	MACS_peak_111815	140.83	364	ENSMUST00000143747	Mdh2	140.83	5.35	46.02	Ensembl	528	chr5:135778722-135783752+	exon sense-overlapping	ENSMUST00000019323	Mdh2	chr5:135778480-135790391+
chr11	53773480	53773832	MACS_peak_27202	140.79	352	ENSMUST00000153054	Irf1	140.79	10.29	28.64	Ensembl	799	chr11:53773153-53774130+	exon sense-overlapping	ENSMUST00000019043	Irf1	chr11:53770495-53777323+
chr7	44970428	44970789	MACS_peak_123917	140.62	361	uc009gse.1	AK020101	140.62	9.32	46.01	UCSC_knowngene	773	chr7:44970429-44974303+	natural antisense	ENSMUST00000063761	Cpt1c	chr7:44959373-44974851-
chr15	83137941	83138522	MACS_peak_66422	140.13	581	ENSMUST00000150926	Poldip3	140.13	4.07	28.64	Ensembl	837	chr15:83137828-83149336-	exon sense-overlapping	ENSMUST00000058793	Poldip3	chr15:83125978-83149384-
chr11	100361617	100362151	MACS_peak_27880	138.95	534	ENSMUST00000167282	Gm10039	138.95	8.09	37.06	Ensembl	534	chr11:100361618-100362151-	intergenic	NA	NA	NA
chr5	124598862	124599783	MACS_peak_144747	138.65	921	ENSMUST00000152822	Tctn2	138.65	9.68	28.72	Ensembl	2313	chr5:124598787-124603330+	exon sense-overlapping	ENSMUST00000100706	Tctn2	chr5:124598749-124627738+
chr10	116581280	116581715	MACS_peak_18991	138.45	435	ENSMUST00000064101	5330438D12Rik	138.45	11.06	37.14	Ensembl	2229	chr10:116581281-116583515+	natural antisense	ENSMUST00000020374	Cnot2	chr10:116509791-116581511-
chr4	59833676	59834219	MACS_peak_125251	137.55	543	ENSMUST00000120410	Gm12543	137.55	8.21	28.79	Ensembl	543	chr4:59833677-59834219+	intron sense-overlapping	ENSMUST00000030080	Snx30	chr4:59805840-59904737+
chr6	86371570	86371993	MACS_peak_117609	137.31	423	uc009crn.1	Snrpg	137.31	7.61	46.72	UCSC_knowngene	741	chr6:86371571-86378902+	exon sense-overlapping	ENSMUST00000089558	Snrpg	chr6:86371583-86378902+
chr7	25089752	25090389	MACS_peak_122652	137.08	637	ENSMUST00000185031	RP24-312B12.1	137.08	12.96	46.73	Ensembl	2430	chr7:25089753-25092182-	exon sense-overlapping	NM_001163554	Pou2f2	chr7:25091115-25132460-
chr8	122446130	122446476	MACS_peak_156259	136.77	346	NR_045696	9330133O14Rik	136.77	12.25	37.3	RefSeq	2836	chr8:122443656-122446476+	intron sense-overlapping	ENSMUST00000127664	Gm20388	chr8:119910841-124345722+
chr2	117257633	117257978	MACS_peak_79913	136.6	345	ENSMUST00000140936	Fam98b	136.6	4.5	46.96	Ensembl	1979	chr2:117249739-117260243+	exon sense-overlapping	ENSMUST00000028825	Fam98b	chr2:117249739-117271540+
chr5	33746052	33746374	MACS_peak_137079	136.39	322	ENSMUST00000149886	Letm1	136.39	3.85	28.89	Ensembl	3056	chr5:33742534-33753562-	exon sense-overlapping	ENSMUST00000005431	Letm1	chr5:33739673-33782817-
chr8	70392921	70393624	MACS_peak_135014	136.13	703	ENSMUST00000142769	Crtc1	136.13	6.95	47.05	Ensembl	10265	chr8:70382355-70439579-	exon sense-overlapping	ENSMUST00000076615	Crtc1	chr8:70382355-70439579-
chr11	18326856	18327409	MACS_peak_18431	136.02	553	ENSMUST00000119030	Gm12020	136.02	11.25	47.03	Ensembl	2042	chr11:18325630-18327671-	intergenic	NA	NA	NA
chrX	77456773	77457228	MACS_peak_195629	133.89	455	ENSMUST00000119715	Gm5937	133.89	5.93	28.8	Ensembl	643	chrX:77456586-77457228+	intergenic	NA	NA	NA
chr11	51997569	51997898	MACS_peak_20278	133.19	329	ENSMUST00000124699	Ube2b	133.19	9.11	47.57	Ensembl	516	chr11:51997570-52000479-	exon sense-overlapping	ENSMUST00000020657	Ube2b	chr11:51985497-52000484-
chr1	150265140	150265628	MACS_peak_6965	132.94	488	ENSMUST00000179686	Gm15453	132.94	6.64	47.39	Ensembl	1130	chr1:150264925-150266056-	intergenic	NA	NA	NA
chr14	25588218	25590448	MACS_peak_46316	132.62	2230	NR_033492	4931406H21Rik	132.62	11.85	37.1	RefSeq	3858	chr14:25586804-25590661+	intron sense-overlapping	ENSMUST00000007961	Zmiz1	chr14:25459267-25664719+
chrX	77648251	77648893	MACS_peak_195669	132.24	642	ENSMUST00000133893	Tbl1x	132.24	8.72	29	Ensembl	3611	chrX:77511214-77659743+	exon sense-overlapping	ENSMUST00000088217	Tbl1x	chrX:77511013-77662983+
chr11	99932161	99933109	MACS_peak_24655	132.17	948	ENSMUST00000117567	Gm11560	132.17	4.38	47.57	Ensembl	948	chr11:99932162-99933109+	intergenic	NA	NA	NA
chr8	69183713	69184189	MACS_peak_176383	131.71	476	ENSMUST00000184061	Lzts1	131.71	7.75	29.11	Ensembl	476	chr8:69183714-69184189-	exon sense-overlapping	ENSMUST00000185176	Lzts1	chr8:69132669-69184225-
chr5	33651962	33652353	MACS_peak_117725	131.46	391	ENSMUST00000143029	Slbp	131.46	4.97	37.12	Ensembl	1577	chr5:33648662-33652353-	exon sense-overlapping	ENSMUST00000057551	Slbp	chr5:33640055-33652574-
chr10	128502408	128502917	MACS_peak_20031	131.39	509	NR_131150	A430046D13Rik	131.39	6.5	37.13	RefSeq	2169	chr10:128499247-128504242+	bidirectional	ENSMUST00000026428	Myl6b	chr10:128494157-128498685-
chrX	152432552	152433328	MACS_peak_151322	130.71	776	ENSMUST00000152262	Gm4750	130.71	13.36	47.9	Ensembl	2200	chrX:152432477-152434676+	intergenic	NA	NA	NA
chrX	142631799	142632912	MACS_peak_197593	130.36	1113	ENSMUST00000061991	Gm5763	130.36	11.08	29.35	Ensembl	1599	chrX:142631483-142633135-	intergenic	NA	NA	NA
chr7	141447907	141448230	MACS_peak_171042	129.65	323	ENSMUST00000140099	Rplp2	129.65	2.59	29.42	Ensembl	786	chr7:141447631-141448616+	exon sense-overlapping	ENSMUST00000084434	Rplp2	chr7:141447370-141451585+
chr9	88522483	88522897	MACS_peak_163696	129.38	414	NR_040721	Snhg5	129.38	6.6	37.4	RefSeq	1084	chr9:88521053-88522897-	intergenic	NA	NA	NA
chr2	166954899	166955332	MACS_peak_84040	129.37	433	ENSMUST00000142481	Stau1	129.37	3.19	48.14	Ensembl	3573	chr2:166948147-166955384-	exon sense-overlapping	ENSMUST00000049412	Stau1	chr2:166948147-166996103-
chr6	136825701	136826109	MACS_peak_121001	129.27	408	ENSMUST00000141598	Wbp11	129.27	6.01	48.12	Ensembl	524	chr6:136825702-136828135-	exon sense-overlapping	ENSMUST00000116514	Wbp11	chr6:136813654-136828233-
chr3	69044405	69044723	MACS_peak_87686	129.1	318	ENSMUST00000153259	Trim59	129.1	7.48	48.1	Ensembl	372	chr3:69043789-69044723-	exon sense-overlapping	ENSMUST00000107802	Trim59	chr3:69035288-69044755-
chr5	130211747	130212118	MACS_peak_145299	128.19	371	ENSMUST00000147493	Rabgef1	128.19	6.6	29.46	Ensembl	880	chr5:130211381-130212975+	exon sense-overlapping	ENSMUST00000026390	Rabgef1	chr5:130187161-130214337+
chr3	108207962	108208574	MACS_peak_89912	128.07	612	ENSMUST00000141054	Atxn7l2	128.07	7.46	48.13	Ensembl	3224	chr3:108202228-108208574-	exon sense-overlapping	ENSMUST00000102633	Atxn7l2	chr3:108202222-108210934-
chr4	124722877	124723382	MACS_peak_130031	127.69	505	ENSMUST00000151049	Sf3a3	127.69	6.85	29.54	Ensembl	879	chr4:124721733-124723382+	exon sense-overlapping	ENSMUST00000030734	Sf3a3	chr4:124714776-124732460+
chr3	32365488	32366001	MACS_peak_86223	127.47	513	NR_027966	4930429B21Rik	127.47	5.52	48.34	RefSeq	1950	chr3:32365489-32367438+	exon sense-overlapping	ENSMUST00000057768	4930429B21Rik	chr3:32365775-32367436+
chr11	120369487	120370052	MACS_peak_27092	127.14	565	ENSMUST00000135635	2310003H01Rik	127.14	4.71	48.37	Ensembl	3766	chr11:120369055-120378735-	exon sense-overlapping	ENSMUST00000026448	2310003H01Rik	chr11:120369562-120378764-
chr16	17530229	17530681	MACS_peak_70582	127.08	452	ENSMUST00000143805	Thap7	127.08	5.65	29.57	Ensembl	849	chr16:17528344-17530681-	exon sense-overlapping	ENSMUST00000100125	Thap7	chr16:17527982-17531136-
chr3	65394425	65395223	MACS_peak_98574	126.9	798	ENSMUST00000178193	Gm5540	126.9	9.17	37.7	Ensembl	1931	chr3:65393301-65395231+	bidirectional	ENSMUST00000029414	Ssr3	chr3:65379655-65392623-
chr9	109095267	109095832	MACS_peak_146780	126.53	565	ENSMUST00000134690	Gm7628	126.53	9.73	48.33	Ensembl	2010	chr9:109093844-109097796-	intronic antisense	ENSMUST00000130366	Plxnb1	chr9:109096710-109100498+
chr16	42907419	42907721	MACS_peak_56026	126.06	302	ENSMUST00000131689	Zbtb20	126.06	12.23	48.46	Ensembl	425	chr16:42907392-43072468+	exon sense-overlapping	ENSMUST00000114694	Zbtb20	chr16:42907652-43642602+
chr17	48400278	48400580	MACS_peak_80994	125.94	302	ENSMUST00000161686	Nfya	125.94	6.25	29.36	Ensembl	2779	chr17:48397927-48409750-	exon sense-overlapping	ENSMUST00000046719	Nfya	chr17:48386896-48409765-
chr1	162713106	162714016	MACS_peak_8111	124.99	910	ENSMUST00000182448	Prrc2c	124.99	5.8	48.3	Ensembl	1215	chr1:162712802-162714016-	exon sense-overlapping	ENSMUST00000028016	Prrc2c	chr1:162673402-162740550-
chr9	57483912	57484223	MACS_peak_161567	124.63	311	ENSMUST00000098689	Gm6166	124.63	8.72	37.3	Ensembl	669	chr9:57483913-57484585+	intergenic	NA	NA	NA
chr8	60923754	60924239	MACS_peak_175795	124.29	485	ENSMUST00000129672	Clcn3	124.29	6.47	29.47	Ensembl	8193	chr8:60911923-60955233-	exon sense-overlapping	ENSMUST00000004430	Clcn3	chr8:60911923-60983239-
chr8	123853828	123854195	MACS_peak_181546	123.58	367	ENSMUST00000118982	Gm4342	123.58	9.02	29.46	Ensembl	367	chr8:123853829-123854195+	intron sense-overlapping	ENSMUST00000127664	Gm20388	chr8:119910841-124345722+
chr2	177460274	177460847	MACS_peak_84691	123.54	573	ENSMUST00000120833	Gm14414	123.54	7.75	48.62	Ensembl	573	chr2:177460275-177460847+	intergenic	NA	NA	NA
chr2	49308154	49309462	MACS_peak_76468	123.26	1308	ENSMUST00000119733	Gm13509	123.26	3.25	48.7	Ensembl	1308	chr2:49308155-49309462+	intron sense-overlapping	ENSMUST00000047413	Mbd5	chr2:49245969-49317069+
chr16	91850805	91851316	MACS_peak_65368	122.95	511	ENSMUST00000154967	Itsn1	122.95	5.41	37.39	Ensembl	777	chr16:91839699-91851316+	exon sense-overlapping	ENSMUST00000056482	Itsn1	chr16:91729371-91871655+
chrX	7643908	7644299	MACS_peak_147990	122.83	391	ENSMUST00000134355	Syp	122.83	5.63	48.69	Ensembl	417	chrX:7643909-7645033+	exon sense-overlapping	ENSMUST00000069520	Syp	chrX:7638471-7653256+
chr7	122133053	122133487	MACS_peak_129355	122.76	434	ENSMUST00000123602	Dctn5	122.76	6.5	48.67	Ensembl	2506	chr7:122133054-122149044+	exon sense-overlapping	ENSMUST00000033156	Dctn5	chr7:122133041-122149044+
chr10	127481313	127481794	MACS_peak_17525	122.69	481	ENSMUST00000164469	R3hdm2	122.69	9.85	48.7	Ensembl	763	chr10:127481314-127484544+	exon sense-overlapping	ENSMUST00000064793	R3hdm2	chr10:127420867-127499349+
chr11	79033112	79033552	MACS_peak_25801	121.9	440	NR_045873	Gm11201	121.9	8.19	37.5	RefSeq	3347	chr11:79023597-79035005+	natural antisense	ENSMUST00000018478	Ksr1	chr11:79013440-79146407-
chr16	98062605	98064238	MACS_peak_76784	121.75	1633	NR_015491	A630089N07Rik	121.75	5.1	29.57	RefSeq	2131	chr16:98062512-98082439-	intergenic	NA	NA	NA
chr17	35660028	35660509	MACS_peak_61359	121.68	481	ENSMUST00000168885	Vars2	121.68	6.74	48.68	Ensembl	708	chr17:35660029-35661648-	exon sense-overlapping	ENSMUST00000043674	Vars2	chr17:35655634-35667592-
chr9	98004655	98005387	MACS_peak_190586	120.96	732	ENSMUST00000162370	4921534H16Rik	120.96	11.11	29.67	Ensembl	1392	chr9:98003420-98005769+	intronic antisense	ENSMUST00000035027	Clstn2	chr9:97444395-98033181-
chr18	7916051	7916387	MACS_peak_64675	119.41	336	ENSMUST00000167057	Wac	119.41	3.29	49.22	Ensembl	560	chr18:7910601-7916387+	exon sense-overlapping	ENSMUST00000074919	Wac	chr18:7868850-7927067+
chr2	167654246	167654727	MACS_peak_84140	118.89	481	ENSMUST00000125874	Tmem189	118.89	5.44	49.37	Ensembl	725	chr2:167654185-167661554-	exon sense-overlapping	ENSMUST00000006587	Tmem189	chr2:167642608-167661556-
chr15	77443284	77443930	MACS_peak_56098	118.33	646	ENSMUST00000119775	Gm6506	118.33	9.72	37.8	Ensembl	1136	chr15:77443285-77444420-	intron sense-overlapping	ENSMUST00000089469	Apol7b	chr15:77422210-77447444-
chr3	96699419	96699983	MACS_peak_100475	117.11	564	ENSMUST00000176288	Pias3	117.11	7.41	37.95	Ensembl	627	chr3:96697133-96699983+	exon sense-overlapping	ENSMUST00000064900	Pias3	chr3:96697083-96706070+
chr5	136485547	136485851	MACS_peak_111961	116.97	304	ENSMUST00000177305	Cux1	116.97	3.34	49.52	Ensembl	3290	chr5:136482875-136567490-	exon sense-overlapping	ENSMUST00000004097	Cux1	chr5:136266410-136567445-
chr14	61648481	61648822	MACS_peak_43589	116.89	341	ENSMUST00000183054	Dleu2	116.89	9.15	49.53	Ensembl	722	chr14:61603589-61648822-	intronic antisense	ENSMUST00000039562	Trim13	chr14:61599512-61605946+
chrX	9009026	9009894	MACS_peak_193651	115.64	868	ENSMUST00000119765	Gm9431	115.64	6.33	29.82	Ensembl	1051	chrX:9009027-9010077-	intergenic	NA	NA	NA
chr13	103356249	103357470	MACS_peak_51015	115.46	1221	ENSMUST00000052030	Gm5454	115.46	4.75	29.8	Ensembl	1455	chr13:103356250-103357704+	intergenic	NA	NA	NA
chr18	67516351	67516757	MACS_peak_68084	115.22	406	uc008fmo.1	AK053505	115.22	7.61	50.14	UCSC_knowngene	3917	chr18:67512841-67516757-	exon sense-overlapping	ENSMUST00000082243	Spire1	chr18:67488213-67552777-
chr10	45485438	45485777	MACS_peak_12287	115.02	339	uc007fac.2	Lin28b	115.02	9.01	50.17	UCSC_knowngene	2902	chr10:45456583-45485777-	exon sense-overlapping	ENSMUST00000079390	Lin28b	chr10:45376620-45470201-
chr3	34638205	34638639	MACS_peak_97351	114.61	434	ENSMUST00000174136	Sox2ot	114.61	8.6	37.4	Ensembl	802	chr3:34638174-34675897+	intron sense-overlapping	ENSMUST00000099151	Sox2	chr3:34650005-34652461+
chr15	78436900	78437734	MACS_peak_65703	114.28	834	ENSMUST00000160916	Kctd17	114.28	4.34	29.94	Ensembl	1146	chr15:78432987-78437734+	exon sense-overlapping	ENSMUST00000089414	Kctd17	chr15:78428628-78438909+
chr4	95967123	95967574	MACS_peak_108856	113.7	451	NR_045776	9530080O11Rik	113.7	9.87	37.58	RefSeq	1479	chr4:95959711-95967655-	natural antisense	ENSMUST00000030306	Hook1	chr4:95967240-96025413+
chr10	116473162	116474387	MACS_peak_16767	113.34	1225	NR_130644	Kcnmb4os2	113.34	4.88	50.26	RefSeq	1615	chr10:116473163-116474986+	natural antisense	ENSMUST00000068233	Kcnmb4	chr10:116417861-116473878-
chr2	105394678	105395071	MACS_peak_79431	113.1	393	ENSMUST00000127019	Rcn1	113.1	3.97	50.25	Ensembl	2208	chr2:105386929-105395348-	exon sense-overlapping	ENSMUST00000006128	Rcn1	chr2:105386291-105399319-
chr1	42953471	42953893	MACS_peak_1967	112.82	422	uc007avc.2	Gpr45	112.82	6.01	50.31	UCSC_knowngene	2038	chr1:42952872-42955147+	exon sense-overlapping	ENSMUST00000179655	Gpr45	chr1:42953139-43030781+
chr19	10206990	10207300	MACS_peak_91977	112.81	310	ENSMUST00000127878	Tmem258	112.81	4.93	30.11	Ensembl	1026	chr19:10204218-10207818+	exon sense-overlapping	ENSMUST00000040372	Tmem258	chr19:10204014-10207824+
chr4	95039161	95039625	MACS_peak_108840	111.94	464	ENSMUST00000119789	Gm12704	111.94	15.11	37.79	Ensembl	464	chr4:95039162-95039625-	intergenic	NA	NA	NA
chr7	35420874	35421234	MACS_peak_138987	111.77	360	ENSMUST00000152020	Cep89	111.77	8.41	37.78	Ensembl	555	chr7:35417640-35421234+	exon sense-overlapping	ENSMUST00000079414	Cep89	chr7:35397055-35438689+
chr1	172080739	172081316	MACS_peak_11492	111.75	577	ENSMUST00000142825	Ncstn	111.75	8.77	30.16	Ensembl	772	chr1:172080740-172082795-	exon sense-overlapping	ENSMUST00000003550	Ncstn	chr1:172066013-172082795-
chr11	97138425	97139334	MACS_peak_24340	111.68	909	ENSMUST00000107613	Tbkbp1	111.68	4.92	50.67	Ensembl	2173	chr11:97138406-97150048-	exon sense-overlapping	ENSMUST00000066078	Tbkbp1	chr11:97136171-97149712-
chr17	71474561	71475328	MACS_peak_71198	111.29	767	ENSMUST00000182747	Smchd1	111.29	7.28	37.82	Ensembl	2790	chr17:71472539-71475328-	exon sense-overlapping	ENSMUST00000127430	Smchd1	chr17:71344489-71475343-
chr1	10115424	10116084	MACS_peak_490	110.94	660	ENSMUST00000136283	Cspp1	110.94	8.38	29.71	Ensembl	778	chr1:10115425-10116731+	exon sense-overlapping	ENSMUST00000071087	Cspp1	chr1:10038218-10136768+
chrX	73859104	73859525	MACS_peak_195465	110.79	421	ENSMUST00000155246	L1cam	110.79	4.63	29.73	Ensembl	661	chrX:73859073-73860155-	exon sense-overlapping	ENSMUST00000066576	L1cam	chrX:73854672-73869804-
chr4	118410368	118411003	MACS_peak_110782	110.32	635	ENSMUST00000152633	Med8	110.32	8.8	37.9	Ensembl	795	chr4:118410348-118411796+	exon sense-overlapping	ENSMUST00000019229	Med8	chr4:118409366-118415111+
chr4	134534020	134535258	MACS_peak_100031	110.28	1238	ENSMUST00000130187	Mtfr1l	110.28	4.14	50.59	Ensembl	4085	chr4:134528385-134535258-	exon sense-overlapping	ENSMUST00000102550	Mtfr1l	chr4:134525550-134535268-
chr9	78131294	78131759	MACS_peak_189448	109.22	465	ENSMUST00000142776	Ick	109.22	3.89	29.91	Ensembl	3040	chr9:78113241-78134119+	exon sense-overlapping	ENSMUST00000009972	Ick	chr9:78113284-78125656+
chr8	34097188	34097491	MACS_peak_150309	109.03	303	ENSMUST00000142661	Dctn6	109.03	6.75	38.2	Ensembl	783	chr8:34092511-34097691-	exon sense-overlapping	ENSMUST00000033913	Dctn6	chr8:34090423-34108796-
chr9	51789559	51789904	MACS_peak_161074	109.01	345	ENSMUST00000124907	Arhgap20	109.01	9.17	38.16	Ensembl	4789	chr9:51765337-51790249+	exon sense-overlapping	ENSMUST00000065496	Arhgap20	chr9:51765352-51853856+
chr8	99146486	99146837	MACS_peak_154287	108.67	351	uc009mzp.1	AK139634	108.67	10.8	37.09	UCSC_knowngene	2875	chr8:99127370-99148189+	intronic antisense	ENSMUST00000093249	Cdh8	chr8:99028769-99416439-
chr4	75147899	75148282	MACS_peak_107837	108.54	383	ENSMUST00000121596	Gm12912	108.54	11.86	37.2	Ensembl	1381	chr4:75147609-75148989+	intergenic	NA	NA	NA
chr11	120189439	120189856	MACS_peak_27057	108.32	417	NR_030682	2810410L24Rik	108.32	9.77	50.9	RefSeq	1707	chr11:120186650-120189856-	intergenic	NA	NA	NA
chr2	156533531	156533867	MACS_peak_93222	107.6	336	ENSMUST00000137067	Epb4.1l1	107.6	5.71	37.24	Ensembl	820	chr2:156533507-156539986+	exon sense-overlapping	ENSMUST00000029155	Epb4.1l1	chr2:156475837-156543214+
chr4	10848402	10849093	MACS_peak_121675	107.52	691	ENSMUST00000084908	Gm12918	107.52	3.97	29.97	Ensembl	691	chr4:10848403-10849093+	intergenic	NA	NA	NA
chr4	139480379	139480836	MACS_peak_100634	106.53	457	ENSMUST00000135534	Ubr4	106.53	4.51	51.14	Ensembl	682	chr4:139480380-139482682+	exon sense-overlapping	ENSMUST00000097822	Ubr4	chr4:139380659-139489588+
chr11	88182302	88182607	MACS_peak_23839	106.19	305	ENSMUST00000132377	Cuedc1	106.19	5.56	51.29	Ensembl	347	chr11:88182303-88183280+	exon sense-overlapping	ENSMUST00000018522	Cuedc1	chr11:88099146-88194140+
chr1	75384699	75385164	MACS_peak_4354	105.97	465	ENSMUST00000125118	Speg	105.97	9.52	37.32	Ensembl	616	chr1:75384700-75387948+	exon sense-overlapping	ENSMUST00000087122	Speg	chr1:75375297-75432320+
chr6	85193893	85194222	MACS_peak_132185	105.77	329	ENSMUST00000173919	Emx1	105.77	6.46	37.35	Ensembl	1258	chr6:85193519-85204462+	exon sense-overlapping	ENSMUST00000045942	Emx1	chr6:85187438-85204358+
chr7	40190908	40191277	MACS_peak_123685	105.58	369	ENSMUST00000155574	Gm6851	105.58	9.21	51.61	Ensembl	438	chr7:40190909-40191346+	intergenic	NA	NA	NA
chrX	152623035	152623335	MACS_peak_151325	105.28	300	ENSMUST00000152746	Shroom2	105.28	3.58	51.67	Ensembl	4251	chrX:152612528-152673240-	exon sense-overlapping	ENSMUST00000062317	Shroom2	chrX:152609992-152769465-
chr15	79420817	79421209	MACS_peak_50115	105.18	392	ENSMUST00000127155	Csnk1e	105.18	2.99	51.69	Ensembl	741	chr15:79419149-79421315-	exon sense-overlapping	ENSMUST00000117786	Csnk1e	chr15:79417856-79441999-
chr5	124136101	124136861	MACS_peak_124371	104.86	760	ENSMUST00000161530	Pitpnm2	104.86	5.01	37.42	Ensembl	4622	chr5:124132978-124140261-	exon sense-overlapping	ENSMUST00000086123	Pitpnm2	chr5:124118690-124216418-
chr1	45857331	45857787	MACS_peak_2542	104.76	456	ENSMUST00000167878	Gm5526	104.76	8.64	37.4	Ensembl	456	chr1:45857332-45857787-	intergenic	NA	NA	NA
chr14	121255101	121255595	MACS_peak_60562	104.67	494	ENSMUST00000137971	Farp1	104.67	4.6	30.16	Ensembl	961	chr14:121254908-121267921+	exon sense-overlapping	ENSMUST00000026635	Farp1	chr14:121035564-121283744+
chr2	34649134	34650362	MACS_peak_99127	104.62	1228	ENSMUST00000100173	Gm13414	104.62	8.12	30.15	Ensembl	1468	chr2:34648895-34650362-	intergenic	NA	NA	NA
chr7	3655570	3656156	MACS_peak_121734	104.35	586	ENSMUST00000143085	Cnot3	104.35	4.85	51.8	Ensembl	2963	chr7:3645290-3661108+	exon sense-overlapping	ENSMUST00000038913	Cnot3	chr7:3645352-3661100+
chr11	24076861	24077367	MACS_peak_21285	104.12	506	ENSMUST00000148087	Gm12063	104.12	14.85	37.55	Ensembl	715	chr11:24076559-24077367+	intergenic	NA	NA	NA
chr17	26199751	26200370	MACS_peak_60259	104.01	619	ENSMUST00000155556	Arhgdig	104.01	3.33	51.52	Ensembl	796	chr17:26199491-26201144-	exon sense-overlapping	ENSMUST00000025019	Arhgdig	chr17:26199183-26201350-
chr5	65591595	65591975	MACS_peak_106206	103.82	380	ENSMUST00000146799	Ube2k	103.82	6.69	51.6	Ensembl	780	chr5:65591596-65595145+	exon sense-overlapping	ENSMUST00000122141	Ube2k	chr5:65537300-65596393+
chr3	95530417	95530974	MACS_peak_116934	102.6	557	ENSMUST00000121058	Hmgb1-ps5	102.6	10.12	29.87	Ensembl	557	chr3:95530418-95530974+	intron sense-overlapping	ENSMUST00000015667	Ctss	chr3:95526786-95556400+
chr11	46450979	46451347	MACS_peak_19917	102.45	368	ENSMUST00000119051	Gm12168	102.45	9.89	51.95	Ensembl	368	chr11:46450980-46451347-	intergenic	NA	NA	NA
chr11	79339692	79340059	MACS_peak_25839	102.33	367	ENSMUST00000145839	Nf1	102.33	8.92	37.91	Ensembl	721	chr11:79339693-79345186+	exon sense-overlapping	ENSMUST00000071325	Nf1	chr11:79339825-79581612+
chrX	7750597	7750905	MACS_peak_148011	102.12	308	ENSMUST00000154977	Ccdc120	102.12	6.49	52.04	Ensembl	372	chrX:7738460-7750905-	exon sense-overlapping	ENSMUST00000033490	Ccdc120	chrX:7731714-7741341-
chr9	15010035	15010447	MACS_peak_183154	101.06	412	ENSMUST00000166933	Panx1	101.06	7.57	30.02	Ensembl	575	chr9:15007918-15010508-	exon sense-overlapping	ENSMUST00000164273	Panx1	chr9:15005161-15045478-
chr16	38346995	38347295	MACS_peak_62506	100.7	300	ENSMUST00000152868	Cox17	100.7	4.47	36.99	Ensembl	416	chr16:38346996-38352741+	exon sense-overlapping	ENSMUST00000050273	Cox17	chr16:38346991-38352763+
chrX	66778462	66778852	MACS_peak_195165	100.49	390	ENSMUST00000118047	Gm14681	100.49	4.24	30.09	Ensembl	411	chrX:66778442-66778852-	intergenic	NA	NA	NA
chr11	4904094	4904465	MACS_peak_23745	100.27	371	ENSMUST00000148117	Thoc5	100.27	7.52	30.09	Ensembl	592	chr11:4902212-4904465+	exon sense-overlapping	ENSMUST00000038237	Thoc5	chr11:4895343-4928865+
chr7	63542523	63544549	MACS_peak_125137	99.98	2026	ENSMUST00000121016	Gm5898	99.98	4.08	52.55	Ensembl	2071	chr7:63542479-63544549+	intron sense-overlapping	ENSMUST00000058476	Otud7a	chr7:63444751-63759028+
chr5	92140255	92140960	MACS_peak_121092	99.8	705	ENSMUST00000170136	Gm15710	99.8	4.53	37.12	Ensembl	705	chr5:92140256-92140960-	intronic antisense	ENSMUST00000031355	Uso1	chr5:92137938-92202794+
chr4	133190128	133190430	MACS_peak_131322	99.73	302	ENSMUST00000136637	Wasf2	99.73	7.42	30.14	Ensembl	599	chr4:133189018-133190549+	exon sense-overlapping	ENSMUST00000084241	Wasf2	chr4:133130505-133199756+
chr11	94425239	94425977	MACS_peak_24142	99.65	738	ENSMUST00000133000	Cacna1g	99.65	4.02	52.6	Ensembl	784	chr11:94425240-94426462-	exon sense-overlapping	ENSMUST00000021234	Cacna1g	chr11:94408406-94474198-
chr7	138846078	138846515	MACS_peak_170773	99	437	ENSMUST00000128157	Ppp2r2d	99	6.59	30.22	Ensembl	3823	chr7:138846079-138871702+	exon sense-overlapping	ENSMUST00000041097	Ppp2r2d	chr7:138846359-138883057+
chr13	26492513	26493087	MACS_peak_45931	98.87	574	ENSMUST00000074645	Gm11353	98.87	3.14	30.23	Ensembl	706	chr13:26492514-26493219+	intergenic	NA	NA	NA
chr11	60574517	60575055	MACS_peak_21103	98.37	538	ENSMUST00000119849	Gm12623	98.37	8.69	53.17	Ensembl	1983	chr11:60573567-60575549-	intergenic	NA	NA	NA
chr17	33931725	33932029	MACS_peak_80076	98.35	304	ENSMUST00000174410	Rgl2	98.35	7.38	30.35	Ensembl	365	chr17:33930883-33932029+	exon sense-overlapping	ENSMUST00000047503	Rgl2	chr17:33929582-33937687+
chr6	47926310	47926896	MACS_peak_130339	98.23	586	ENSMUST00000156500	Zfp212	98.23	6.79	37.39	Ensembl	718	chr6:47926306-47927146+	exon sense-overlapping	ENSMUST00000009411	Zfp212	chr6:47920476-47932639+
chr2	118693866	118694640	MACS_peak_104802	97.41	774	ENSMUST00000132577	Pak6	97.41	3.68	30.42	Ensembl	3248	chr2:118677263-118697236+	exon sense-overlapping	ENSMUST00000099557	Pak6	chr2:118663303-118698020+
chr2	30955370	30955953	MACS_peak_84687	97.22	583	ENSMUST00000133544	Tor1b	97.22	8.85	37.75	Ensembl	4775	chr2:30952979-30959011+	exon sense-overlapping	ENSMUST00000028199	Tor1b	chr2:30952959-30959015+
chr7	130979300	130979649	MACS_peak_146484	97.22	349	ENSMUST00000150717	Htra1	97.22	10.8	37.75	Ensembl	1572	chr7:130936111-130979934+	exon sense-overlapping	ENSMUST00000006367	Htra1	chr7:130936203-130985660+
chr4	107064586	107064965	MACS_peak_128443	96.85	379	ENSMUST00000138788	Mrpl37	96.85	3.94	29.98	Ensembl	876	chr4:107064396-107065357-	exon sense-overlapping	ENSMUST00000030365	Mrpl37	chr4:107055874-107066868-
chr1	189836257	189836607	MACS_peak_9721	96.7	350	ENSMUST00000181876	Gm26574	96.7	6.99	52.88	Ensembl	2141	chr1:189833141-189836620-	natural antisense	ENSMUST00000027898	Ptpn14	chr1:189786633-189876695+
chr5	24325447	24325881	MACS_peak_103660	96.1	434	ENSMUST00000142197	Kcnh2	96.1	10.23	52.84	Ensembl	605	chr5:24325448-24326519-	exon sense-overlapping	ENSMUST00000036092	Kcnh2	chr5:24319589-24351604-
chr2	25203140	25203601	MACS_peak_74536	95.73	461	ENSMUST00000146729	Nelfb	95.73	5.6	53.04	Ensembl	494	chr2:25201154-25203601-	exon sense-overlapping	ENSMUST00000059849	Nelfb	chr2:25199712-25211489-
chr10	56354618	56355074	MACS_peak_16995	95.56	456	ENSMUST00000172445	Rps8-ps1	95.56	6.52	30.03	Ensembl	456	chr10:56354619-56355074-	intergenic	NA	NA	NA
chr19	4396375	4397095	MACS_peak_78514	95.44	720	ENSMUST00000176495	Kdm2a	95.44	6.62	37.95	Ensembl	3207	chr19:4392471-4397095-	exon sense-overlapping	ENSMUST00000047898	Kdm2a	chr19:4316144-4398285-
chr1	171272350	171272756	MACS_peak_9723	95.07	406	ENSMUST00000129985	B4galt3	95.07	5.74	37.96	Ensembl	2805	chr1:171270374-171276896+	exon sense-overlapping	ENSMUST00000064272	B4galt3	chr1:171270328-171276895+
chr2	180976306	180976752	MACS_peak_85056	94.99	446	ENSMUST00000138706	Arfgap1	94.99	4.76	53.15	Ensembl	605	chr2:180973486-180976752+	exon sense-overlapping	ENSMUST00000029092	Arfgap1	chr2:180967234-180982526+
chr10	81073152	81073561	MACS_peak_14609	94.89	409	ENSMUST00000167658	Thop1	94.89	5.3	53.2	Ensembl	1877	chr10:81070127-81074877+	exon sense-overlapping	ENSMUST00000005057	Thop1	chr10:81070035-81082559+
chr3	93278227	93278788	MACS_peak_100069	94.59	561	ENSMUST00000122125	Rplp0-ps1	94.59	11.88	37.99	Ensembl	933	chr3:93278141-93279073+	intergenic	NA	NA	NA
chr3	88206812	88207354	MACS_peak_116334	94.37	542	uc008pug.1	AK141565	94.37	5.93	30.07	UCSC_knowngene	2203	chr3:88206813-88211295+	intergenic	NA	NA	NA
chr7	89976743	89977049	MACS_peak_165963	94.02	306	ENSMUST00000157001	Eed	94.02	5.28	30.09	Ensembl	454	chr7:89976744-89980559-	exon sense-overlapping	ENSMUST00000107234	Eed	chr7:89954656-89980983-
chr1	195035956	195036337	MACS_peak_11448	93.62	381	NR_015566	A330023F24Rik	93.62	7.51	38.19	RefSeq	5195	chr1:195017399-195037908+	intergenic	NA	NA	NA
chr17	47368891	47369560	MACS_peak_61912	93.53	669	ENSMUST00000135418	Mrps10	93.53	5.4	53.53	Ensembl	4090	chr17:47368892-47375945+	exon sense-overlapping	ENSMUST00000060752	Mrps10	chr17:47369197-47378678+
chr7	46050545	46051030	MACS_peak_124086	93.42	485	ENSMUST00000182564	Nomo1	93.42	3.92	53.6	Ensembl	740	chr7:46050121-46051030+	exon sense-overlapping	ENSMUST00000033121	Nomo1	chr7:46033698-46084212+
chr11	102406361	102406884	MACS_peak_24925	93.4	523	ENSMUST00000147860	Slc25a39	93.4	4.82	53.59	Ensembl	656	chr11:102405739-102406884-	exon sense-overlapping	ENSMUST00000018821	Slc25a39	chr11:102402985-102407544-
chr5	76196738	76197094	MACS_peak_140195	93.38	356	ENSMUST00000119356	Apc-ps1	93.38	8.16	30.18	Ensembl	470	chr5:76196625-76197094+	intron sense-overlapping	ENSMUST00000031144	Tmem165	chr5:76183880-76209245+
chr17	46723673	46724027	MACS_peak_61783	93.2	354	ENSMUST00000144964	Pex6	93.2	3.82	53.62	Ensembl	3383	chr17:46711463-46725541+	exon sense-overlapping	ENSMUST00000002840	Pex6	chr17:46711463-46725541+
chr7	80391727	80393621	MACS_peak_126197	93.14	1894	ENSMUST00000146771	Furin	93.14	4.92	53.62	Ensembl	5736	chr7:80388585-80396353-	exon sense-overlapping	ENSMUST00000107362	Furin	chr7:80389194-80405431-
chr2	20235705	20236010	MACS_peak_83666	92.93	305	ENSMUST00000120816	Gm13328	92.93	8.64	37.08	Ensembl	1020	chr2:20235045-20236064-	intronic antisense	ENSMUST00000114610	Etl4	chr2:19909780-20744816+
chr11	73037194	73037625	MACS_peak_25068	92.43	431	ENSMUST00000155720	Camkk1	92.43	9.46	37.27	Ensembl	3717	chr11:73019008-73042062+	exon sense-overlapping	ENSMUST00000092937	Camkk1	chr11:73019043-73042073+
chr4	119872650	119873241	MACS_peak_129529	92.32	591	uc008umy.2	Hivep3	92.32	4.4	30.28	UCSC_knowngene	1103	chr4:119733784-119873325+	exon sense-overlapping	ENSMUST00000084306	Hivep3	chr4:119733796-119736768+
chr10	74316962	74317264	MACS_peak_15705	92.12	302	uc007fpe.1	Pcdh15	92.12	7.48	37.33	UCSC_knowngene	2436	chr10:73099342-74317264+	exon sense-overlapping	ENSMUST00000064562	Pcdh15	chr10:73821867-74634765+
chr10	80038240	80038613	MACS_peak_19199	91.94	373	ENSMUST00000143438	Polr2e	91.94	4.66	30.3	Ensembl	2403	chr10:80035949-80039710-	exon sense-overlapping	ENSMUST00000004786	Polr2e	chr10:80035949-80039795-
chr1	60592250	60592709	MACS_peak_3349	91.37	459	ENSMUST00000118530	Gm11578	91.37	9.46	37.46	Ensembl	459	chr1:60592251-60592709-	intergenic	NA	NA	NA
chr11	98693804	98694873	MACS_peak_24561	91.31	1069	ENSMUST00000152102	Psmd3	91.31	3.41	54.2	Ensembl	2850	chr11:98682591-98695049+	exon sense-overlapping	ENSMUST00000017365	Psmd3	chr11:98682554-98695979+
chr4	146475328	146476111	MACS_peak_132900	91.21	783	ENSMUST00000165994	Gm13241	91.21	7.66	30.43	Ensembl	783	chr4:146475329-146476111+	intergenic	NA	NA	NA
chr2	4431653	4432467	MACS_peak_96210	90.93	814	ENSMUST00000141746	Frmd4a	90.93	6.8	30.51	Ensembl	2412	chr2:4389616-4433512+	exon sense-overlapping	ENSMUST00000075767	Frmd4a	chr2:4400975-4614043+
chr9	33728212	33728889	MACS_peak_184891	90.71	677	ENSMUST00000116000	Gm10698	90.71	3.39	30.53	Ensembl	677	chr9:33728213-33728889+	intergenic	NA	NA	NA
chr10	81265429	81265807	MACS_peak_14650	90.65	378	ENSMUST00000145452	Mrpl54	90.65	5.7	53.79	Ensembl	530	chr10:81265430-81266924-	exon sense-overlapping	ENSMUST00000046114	Mrpl54	chr10:81264713-81266934-
chr4	129466620	129466990	MACS_peak_99430	90.63	370	ENSMUST00000131741	Bsdc1	90.63	5.65	53.82	Ensembl	3025	chr4:129461684-129470174+	exon sense-overlapping	ENSMUST00000048162	Bsdc1	chr4:129461581-129488498+
chr1	92946884	92947234	MACS_peak_6518	90.41	350	ENSMUST00000136598	Capn10	90.41	5.9	30.56	Ensembl	458	chr1:92946885-92947590+	exon sense-overlapping	ENSMUST00000027488	Capn10	chr1:92934376-92947941+
chr2	32760294	32760666	MACS_peak_98751	90.01	372	ENSMUST00000149987	Tor2a	90.01	7.06	29.94	Ensembl	716	chr2:32760295-32761789+	exon sense-overlapping	ENSMUST00000009707	Tor2a	chr2:32757234-32762244+
chr5	33730143	33730812	MACS_peak_104594	89.07	669	ENSMUST00000134610	Fgfr3	89.07	4.73	54.13	Ensembl	3132	chr5:33723004-33732790+	exon sense-overlapping	ENSMUST00000067150	Fgfr3	chr5:33721724-33737067+
chr13	67754606	67755310	MACS_peak_37634	88.72	704	NR_027969	Zfp85os	88.72	7.16	54.36	RefSeq	2908	chr13:67729262-67756838+	natural antisense	ENSMUST00000091520	Zfp85-rs1	chr13:67747800-67755134-
chr4	67931051	67931739	MACS_peak_125566	88.7	688	ENSMUST00000117071	Gm11249	88.7	6.28	30.08	Ensembl	859	chr4:67930881-67931739+	intergenic	NA	NA	NA
chr8	27042428	27043042	MACS_peak_173793	88.08	614	ENSMUST00000178990	1700024N20Rik	88.08	6.84	30.12	Ensembl	666	chr8:27042377-27043042-	natural antisense	ENSMUST00000033875	Prosc	chr8:27042555-27056131+
chr9	57095265	57095581	MACS_peak_161529	87.35	316	ENSMUST00000165927	Sin3a	87.35	7.31	38.15	Ensembl	641	chr9:57095248-57097880+	exon sense-overlapping	ENSMUST00000049169	Sin3a	chr9:57086581-57128366+
chr15	89213553	89214318	MACS_peak_67173	87.25	765	ENSMUST00000181384	Gm26798	87.25	9.72	30.21	Ensembl	2837	chr15:89211559-89215012-	natural antisense	NM_026813	Ppp6r2	chr15:89211559-89286261+
chr16	51363177	51363541	MACS_peak_73827	87.09	364	ENSMUST00000118650	Gm6767	87.09	6.35	30.21	Ensembl	1381	chr16:51362452-51363832-	intergenic	NA	NA	NA
chr4	155943849	155944698	MACS_peak_115283	86.83	849	uc008wfo.1	AK160359	86.83	6.67	38.23	UCSC_knowngene	1856	chr4:155943850-155945705+	exon sense-overlapping	ENSMUST00000024056	Ube2j2	chr4:155943850-155959604+
chr1	194656491	194657293	MACS_peak_13317	86.7	802	ENSMUST00000125381	Plxna2	86.7	4.73	30.23	Ensembl	3951	chr1:194644856-194660012+	exon sense-overlapping	ENSMUST00000027952	Plxna2	chr1:194619829-194816869+
chr11	78167462	78167895	MACS_peak_22702	86.59	433	ENSMUST00000141444	Nek8	86.59	4.88	54.72	Ensembl	626	chr11:78167254-78168033-	exon sense-overlapping	ENSMUST00000017549	Nek8	chr11:78166106-78176675-
chr4	41188980	41189286	MACS_peak_93663	86.27	306	ENSMUST00000123642	Ube2r2	86.27	3.64	54.78	Ensembl	831	chr4:41188888-41191036+	exon sense-overlapping	ENSMUST00000040008	Ube2r2	chr4:41135743-41193380+
chr5	35102127	35102539	MACS_peak_137336	85.87	412	ENSMUST00000152028	Lrpap1	85.87	3.93	30.39	Ensembl	630	chr5:35102128-35105696-	exon sense-overlapping	ENSMUST00000030986	Lrpap1	chr5:35091490-35105766-
chr11	115350501	115351003	MACS_peak_29495	85.74	502	ENSMUST00000146256	Hid1	85.74	3.35	38.47	Ensembl	762	chr11:115349009-115351003-	exon sense-overlapping	ENSMUST00000044152	Hid1	chr11:115347707-115367719-
chr10	45707476	45707807	MACS_peak_14107	85.36	331	ENSMUST00000155368	Hace1	85.36	8.64	36.92	Ensembl	10257	chr10:45677117-45712271+	exon sense-overlapping	ENSMUST00000037044	Hace1	chr10:45577829-45712345+
chr11	78512387	78512690	MACS_peak_25747	85.21	303	ENSMUST00000136284	Poldip2	85.21	5.65	37.15	Ensembl	479	chr11:78512388-78513980+	exon sense-overlapping	ENSMUST00000001127	Poldip2	chr11:78512193-78522736+
chr3	88911536	88913106	MACS_peak_116460	84.62	1570	ENSMUST00000147828	Msto1	84.62	4.67	30.54	Ensembl	3891	chr3:88909644-88913903-	exon sense-overlapping	ENSMUST00000107494	Msto1	chr3:88905107-88913931-
chr2	129800360	129801459	MACS_peak_90928	84.17	1099	NR_029452	4932416H05Rik	84.17	6.19	37.27	RefSeq	3091	chr2:129798369-129801459-	natural antisense	ENSMUST00000165413	Stk35	chr2:129800517-129828974+
chrX	38685592	38686277	MACS_peak_167417	83.9	685	ENSMUST00000101630	Ap3s1-ps1	83.9	7.6	37.34	Ensembl	760	chrX:38685518-38686277-	intergenic	NA	NA	NA
chr10	127578328	127578714	MACS_peak_23274	83.63	386	ENSMUST00000129877	Lrp1	83.63	3.94	30.71	Ensembl	550	chr10:127578329-127581885-	exon sense-overlapping	ENSMUST00000049149	Lrp1	chr10:127538161-127621148-
chr4	151985535	151985861	MACS_peak_114760	83.56	326	ENSMUST00000146471	Thap3	83.56	6.32	37.41	Ensembl	501	chr4:151985459-151988980-	exon sense-overlapping	ENSMUST00000036680	Thap3	chr4:151982639-151988997-
chr11	6011664	6012578	MACS_peak_20540	83.51	914	ENSMUST00000129098	Camk2b	83.51	6.02	37.42	Ensembl	4125	chr11:6011665-6065658-	exon sense-overlapping	ENSMUST00000002817	Camk2b	chr11:5971672-6065742-
chr3	88325478	88326312	MACS_peak_88440	83.29	834	ENSMUST00000152801	0610031J06Rik	83.29	4.43	54.99	Ensembl	2430	chr3:88325060-88327587+	exon sense-overlapping	ENSMUST00000001454	0610031J06Rik	chr3:88325082-88328368+
chr8	124305344	124305814	MACS_peak_138994	83.01	470	ENSMUST00000162325	1810008B01Rik	83.01	6.15	55.02	Ensembl	829	chr8:124305132-124306507-	natural antisense	ENSMUST00000034458	Galnt2	chr8:124231391-124345722+
chr2	105554200	105554845	MACS_peak_89286	82.98	645	ENSMUST00000119438	Rpl10-ps1	82.98	6.82	37.46	Ensembl	645	chr2:105554201-105554845-	intergenic	NA	NA	NA
chr11	107043234	107043825	MACS_peak_25427	82.94	591	ENSMUST00000138443	Bptf	82.94	5.63	55.01	Ensembl	1061	chr11:107043041-107047275-	exon sense-overlapping	ENSMUST00000057892	Bptf	chr11:107033081-107131922-
chr17	24351949	24352251	MACS_peak_67440	82.54	302	ENSMUST00000133816	Abca3	82.54	5.05	37.51	Ensembl	3758	chr17:24351950-24397783+	exon sense-overlapping	ENSMUST00000039013	Abca3	chr17:24352023-24410201+
chr11	119602969	119603971	MACS_peak_26925	82.18	1002	ENSMUST00000125583	Rptor	82.18	4.95	55.09	Ensembl	2569	chr11:119602905-119823176+	exon sense-overlapping	ENSMUST00000026671	Rptor	chr11:119603149-119899407+
chr18	75365331	75365862	MACS_peak_90092	81.96	531	ENSMUST00000174338	Gm20544	81.96	10.45	30.07	Ensembl	690	chr18:75365332-75367088-	bidirectional	ENSMUST00000026999	Smad7	chr18:75367529-75395935+
chr7	131373056	131373403	MACS_peak_170250	81.86	347	ENSMUST00000124672	Pstk	81.86	6.45	30.11	Ensembl	1615	chr7:131373035-131387833+	exon sense-overlapping	ENSMUST00000075610	Pstk	chr7:131371141-131387839+
chr16	18323490	18324192	MACS_peak_54087	81.79	702	ENSMUST00000134385	Tango2	81.79	5.74	55.11	Ensembl	3813	chr16:18320851-18348083-	exon sense-overlapping	ENSMUST00000115628	Tango2	chr16:18300827-18343927-
chr9	62428262	62429053	MACS_peak_143570	81.38	791	ENSMUST00000151604	Coro2b	81.38	4.83	55.09	Ensembl	816	chr9:62428263-62429250-	exon sense-overlapping	ENSMUST00000048043	Coro2b	chr9:62419492-62537044-
chr16	4068662	4069021	MACS_peak_59038	81.27	359	ENSMUST00000138594	Trap1	81.27	5.19	37.77	Ensembl	621	chr16:4065330-4077827-	exon sense-overlapping	ENSMUST00000006137	Trap1	chr16:4039971-4077827-
chr19	47855214	47855522	MACS_peak_72469	81.26	308	ENSMUST00000130157	Gsto1	81.26	5.42	55.23	Ensembl	551	chr19:47855083-47855725+	exon sense-overlapping	ENSMUST00000026050	Gsto1	chr19:47854970-47864790+
chr7	49575470	49576168	MACS_peak_124445	80.58	698	ENSMUST00000184102	Nav2	80.58	4.09	55.39	Ensembl	1466	chr7:49575140-49576605+	exon sense-overlapping	ENSMUST00000064395	Nav2	chr7:49246189-49610087+
chr4	80002751	80003108	MACS_peak_95906	80.57	357	ENSMUST00000120362	Gm11407	80.57	4.98	55.35	Ensembl	1058	chr4:80002331-80003388+	intergenic	NA	NA	NA
chr4	58483265	58483825	MACS_peak_125091	79.95	560	ENSMUST00000119701	Gm12577	79.95	8.31	30.3	Ensembl	574	chr4:58483252-58483825-	intron sense-overlapping	ENSMUST00000055018	Lpar1	chr4:58435255-58553357-
chr14	62587152	62588310	MACS_peak_43618	79.68	1158	ENSMUST00000162987	Fam124a	79.68	4.18	55.82	Ensembl	1671	chr14:62555737-62588523+	exon sense-overlapping	ENSMUST00000039064	Fam124a	chr14:62555737-62608486+
chr17	33999089	33999474	MACS_peak_61215	79.61	385	ENSMUST00000172782	H2-K1	79.61	4.39	55.83	Ensembl	480	chr17:33997509-33999474-	exon sense-overlapping	ENSMUST00000025181	H2-K1	chr17:33996053-34000333-
chr7	31150790	31151298	MACS_peak_138803	79.49	508	ENSMUST00000181958	G630030J09Rik	79.49	6.92	38.24	Ensembl	2135	chr7:31149528-31152707+	natural antisense	ENSMUST00000001280	Gramd1a	chr7:31130127-31151050-
chr7	19597701	19598124	MACS_peak_160306	79.09	423	ENSMUST00000180681	Gm26890	79.09	5.51	30.39	Ensembl	3221	chr7:19597293-19602294-	intron sense-overlapping	ENSMUST00000086041	Clasrp	chr7:19581044-19604468-
chr17	77674375	77674702	MACS_peak_71458	79.06	327	ENSMUST00000168236	Gm17538	79.06	9.38	38.27	Ensembl	327	chr17:77674376-77674702-	intergenic	NA	NA	NA
chr4	103619358	103619745	MACS_peak_109450	79.04	387	ENSMUST00000143294	Dab1	79.04	5.93	38.25	Ensembl	1295	chr4:103619359-104178521+	exon sense-overlapping	ENSMUST00000106827	Dab1	chr4:103619665-104680382+
chr11	101125202	101125548	MACS_peak_24772	78.55	346	ENSMUST00000137844	Tubg1	78.55	4.38	56.23	Ensembl	852	chr11:101124500-101125828+	exon sense-overlapping	ENSMUST00000043680	Tubg1	chr11:101119938-101126419+
chr14	66158530	66158855	MACS_peak_44030	78.1	325	ENSMUST00000136216	Ptk2b	78.1	7.75	56.22	Ensembl	3478	chr14:66153267-66160678-	exon sense-overlapping	ENSMUST00000022622	Ptk2b	chr14:66153257-66281052-
chr5	121451991	121452370	MACS_peak_123881	76.7	379	uc008zjh.1	Tmem116	76.7	2.82	37.29	UCSC_knowngene	2220	chr5:121451893-121524182+	exon sense-overlapping	ENSMUST00000031405	Tmem116	chr5:121463152-121495421+
chr2	36136248	36136611	MACS_peak_85524	76.24	363	ENSMUST00000142809	Rbm18	76.24	5.13	37.33	Ensembl	3509	chr2:36126220-36136611-	exon sense-overlapping	ENSMUST00000028251	Rbm18	chr2:36116079-36136773-
chr4	146932741	146933389	MACS_peak_101216	76.04	648	ENSMUST00000179197	Gm20760	76.04	5.8	56.18	Ensembl	648	chr4:146932742-146933389+	intergenic	NA	NA	NA
chr11	54746356	54746752	MACS_peak_23445	75.84	396	ENSMUST00000120487	Gm12229	75.84	6.21	37.5	Ensembl	468	chr11:54746357-54746824-	intron sense-overlapping	ENSMUST00000064104	Cdc42se2	chr11:54717456-54787675-
chr1	121449391	121449751	MACS_peak_5586	75.56	360	ENSMUST00000155673	Ccdc93	75.56	6.48	56.25	Ensembl	1036	chr1:121431095-121449751+	exon sense-overlapping	ENSMUST00000036025	Ccdc93	chr1:121431049-121506460+
chr11	5032417	5032790	MACS_peak_23784	75.44	373	ENSMUST00000145704	Ap1b1	75.44	5.45	30.14	Ensembl	717	chr11:5030977-5032790+	exon sense-overlapping	ENSMUST00000009234	Ap1b1	chr11:4986824-5042791+
chrX	74283647	74284518	MACS_peak_149436	74.74	871	ENSMUST00000149055	Taz	74.74	5.17	56.4	Ensembl	2891	chrX:74282750-74285887+	exon sense-overlapping	ENSMUST00000069722	Taz	chrX:74282697-74290151+
chr6	124700240	124700560	MACS_peak_135418	74.63	320	ENSMUST00000133797	Lpcat3	74.63	9.38	37.85	Ensembl	667	chr6:124663215-124700560+	exon sense-overlapping	ENSMUST00000004381	Lpcat3	chr6:124663027-124704418+
chr5	34503285	34503827	MACS_peak_104709	74.55	542	ENSMUST00000159102	Tnip2	74.55	8.04	56.39	Ensembl	584	chr5:34503286-34513660-	exon sense-overlapping	ENSMUST00000030991	Tnip2	chr5:34496087-34513963-
chr5	144881424	144881819	MACS_peak_147488	74.24	395	ENSMUST00000126822	Smurf1	74.24	3.55	30.27	Ensembl	4710	chr5:144876495-144886476-	exon sense-overlapping	ENSMUST00000085684	Smurf1	chr5:144876502-144965847-
chr3	95008379	95009658	MACS_peak_116849	74.04	1279	ENSMUST00000146169	Zfp687	74.04	4.95	30.3	Ensembl	4930	chr3:95006590-95011807-	exon sense-overlapping	ENSMUST00000019482	Zfp687	chr3:95006702-95015238-
chr9	124439587	124440122	MACS_peak_147897	73.92	535	uc029xhe.1	AK054122	73.92	4.82	56.57	UCSC_knowngene	795	chr9:124438995-124440897-	exon sense-overlapping	ENSMUST00000180233	Gm20783	chr9:124438996-124440899-
chr5	108571388	108571869	MACS_peak_108563	73.44	481	ENSMUST00000133745	Gak	73.44	4.19	56.92	Ensembl	625	chr5:108570173-108571869-	exon sense-overlapping	ENSMUST00000046603	Gak	chr5:108569414-108629739-
chr5	129602101	129602451	MACS_peak_111068	73.24	350	ENSMUST00000177802	Mmp17	73.24	5.56	57.02	Ensembl	646	chr5:129596626-129602451+	exon sense-overlapping	ENSMUST00000031390	Mmp17	chr5:129584169-129608875+
chr11	108716482	108716822	MACS_peak_29031	72.56	340	ENSMUST00000118777	Gm11671	72.56	7.29	38.11	Ensembl	424	chr11:108716483-108716906+	intron sense-overlapping	ENSMUST00000061287	Cep112	chr11:108425266-108860614+
chr1	33723785	33724510	MACS_peak_1253	72.03	725	ENSMUST00000135330	Rab23	72.03	4.8	57.29	Ensembl	2047	chr1:33719910-33725476+	exon sense-overlapping	ENSMUST00000088287	Rab23	chr1:33719882-33742564+
chr7	74346647	74347083	MACS_peak_125809	71.54	436	ENSMUST00000142175	Slco3a1	71.54	3.64	56.5	Ensembl	628	chr7:74331008-74347231-	exon sense-overlapping	ENSMUST00000026897	Slco3a1	chr7:74281858-74554614-
chr4	18009217	18009716	MACS_peak_104679	71.35	499	ENSMUST00000122346	Gm11860	71.35	6.88	38.32	Ensembl	1010	chr4:18009218-18010227-	intronic antisense	ENSMUST00000029881	Mmp16	chr4:17853458-18119145+
chr19	5109426	5109841	MACS_peak_91416	71.02	415	ENSMUST00000137403	Klc2	71.02	4.47	30.84	Ensembl	841	chr19:5109427-5111445-	exon sense-overlapping	ENSMUST00000025798	Klc2	chr19:5107746-5118300-
chr2	32312683	32313077	MACS_peak_75377	70.82	394	ENSMUST00000141633	Dnm1	70.82	7	56.47	Ensembl	495	chr2:32312242-32313077-	exon sense-overlapping	ENSMUST00000078352	Dnm1	chr2:32308471-32353247-
chr7	126107070	126107427	MACS_peak_129651	70.79	357	ENSMUST00000167315	Xpo6	70.79	4.99	56.45	Ensembl	2806	chr7:126101721-126110051-	exon sense-overlapping	ENSMUST00000009344	Xpo6	chr7:126101716-126200408-
chr5	118228783	118229100	MACS_peak_123607	70.42	317	ENSMUST00000134281	Rnft2	70.42	4.8	37.26	Ensembl	775	chr5:118193572-118229145-	exon sense-overlapping	ENSMUST00000117177	Rnft2	chr5:118190736-118244861-
chr10	80240416	80241395	MACS_peak_19230	70.4	979	ENSMUST00000138801	Mum1	70.4	4.57	30.94	Ensembl	7927	chr10:80234194-80243903+	exon sense-overlapping	ENSMUST00000020365	Mum1	chr10:80226434-80243903+
chr12	90331484	90332470	MACS_peak_32258	69.8	986	uc007oka.1	Nrxn3	69.8	4.17	56.52	UCSC_knowngene	6280	chr12:88722876-90333465+	exon sense-overlapping	ENSMUST00000057634	Nrxn3	chr12:88953399-90333060+
chr7	4468297	4469392	MACS_peak_159461	69.79	1095	NR_028416	D630041G03Rik	69.79	8.64	30.13	RefSeq	3640	chr7:4467245-4470884-	natural antisense	ENSMUST00000086372	Eps8l1	chr7:4464742-4479242+
chr14	54477473	54477894	MACS_peak_56440	69.71	421	ENSMUST00000170337	Rem2	69.71	4	30.14	Ensembl	556	chr14:54476240-54477894+	exon sense-overlapping	ENSMUST00000164697	Rem2	chr14:54476252-54479679+
chr4	154642385	154642868	MACS_peak_134049	69.58	483	uc008wbz.1	AK083203	69.58	5.13	30.15	UCSC_knowngene	3534	chr4:154637576-154644716+	bidirectional	ENSMUST00000030902	Prdm16	chr4:154316125-154636866-
chr4	145729580	145730212	MACS_peak_114001	69.52	632	ENSMUST00000121816	Gm13232	69.52	9.72	37.5	Ensembl	632	chr4:145729581-145730212-	intergenic	NA	NA	NA
chrX	51219502	51219850	MACS_peak_167753	69.45	348	ENSMUST00000120059	Gm5388	69.45	7.05	37.52	Ensembl	1117	chrX:51218877-51219993-	intergenic	NA	NA	NA
chr14	24156945	24157265	MACS_peak_41197	69.44	320	ENSMUST00000167343	Dlg5	69.44	5.13	56.62	Ensembl	742	chr14:24154308-24157265-	exon sense-overlapping	ENSMUST00000042009	Dlg5	chr14:24133953-24177789-
chr7	93178982	93179669	MACS_peak_127080	69.41	687	ENSMUST00000133910	Gm15501	69.41	4.04	56.64	Ensembl	687	chr7:93178983-93179669-	intergenic	NA	NA	NA
chr2	92348910	92349448	MACS_peak_103138	69.16	538	ENSMUST00000161044	Phf21a	69.16	5.67	30.2	Ensembl	832	chr2:92348911-92356993+	exon sense-overlapping	ENSMUST00000044036	Phf21a	chr2:92093117-92364666+
chr1	97745420	97746136	MACS_peak_6704	68.95	716	ENSMUST00000152788	Ppip5k2	68.95	4.26	30.25	Ensembl	3844	chr1:97742171-97746136-	exon sense-overlapping	ENSMUST00000042509	Ppip5k2	chr1:97706048-97770411-
chr2	154517708	154518052	MACS_peak_92901	68.88	344	ENSMUST00000135647	Cbfa2t2	68.88	6.81	37.63	Ensembl	381	chr2:154515962-154518052+	exon sense-overlapping	ENSMUST00000045270	Cbfa2t2	chr2:154436495-154539356+
chr12	29528310	29528995	MACS_peak_32199	68.6	685	uc029rrq.1	BC056457	68.6	3.67	37.65	UCSC_knowngene	757	chr12:29527636-29529028+	exon sense-overlapping	ENSMUST00000049784	Myt1l	chr12:29528384-29923209+
chr13	103160351	103160909	MACS_peak_43841	68.57	558	ENSMUST00000147973	Gm6211	68.57	9.72	37.65	Ensembl	4275	chr13:103159795-103164069-	intron sense-overlapping	ENSMUST00000164111	Mast4	chr13:102852506-103334460-
chr6	128313349	128313960	MACS_peak_120621	68.36	611	ENSMUST00000054444	Rpl18-ps2	68.36	6.92	57.06	Ensembl	623	chr6:128313338-128313960+	intergenic	NA	NA	NA
chr3	152840684	152841170	MACS_peak_120591	68.25	486	ENSMUST00000162642	Pigk	68.25	7.52	30.35	Ensembl	3641	chr3:152714113-152842921+	exon sense-overlapping	ENSMUST00000045029	Pigk	chr3:152714113-152785922+
chr8	61533353	61533841	MACS_peak_134465	68.12	488	ENSMUST00000136825	Palld	68.12	4.24	57.21	Ensembl	680	chr8:61525121-61533841-	exon sense-overlapping	ENSMUST00000034057	Palld	chr8:61515021-61902690-
chrX	48208049	48208579	MACS_peak_167648	67.89	530	ENSMUST00000127440	Zdhhc9	67.89	4.06	37.82	Ensembl	3432	chrX:48190044-48208602-	exon sense-overlapping	ENSMUST00000037960	Zdhhc9	chrX:48171969-48208687-
chr2	155460357	155460892	MACS_peak_108437	67.4	535	ENSMUST00000116491	Gm14239	67.4	4.55	30.53	Ensembl	685	chr2:155459501-155460892-	intron sense-overlapping	ENSMUST00000109670	Ncoa6	chr2:155390665-155473806-
chr8	14925049	14925419	MACS_peak_132164	67.1	370	ENSMUST00000160619	Arhgef10	67.1	4.39	57.36	Ensembl	3289	chr8:14911717-14928291+	exon sense-overlapping	ENSMUST00000084207	Arhgef10	chr8:14911663-15001085+
chr8	36576838	36577269	MACS_peak_133465	66.59	431	ENSMUST00000156312	Dlc1	66.59	5.75	57.63	Ensembl	3423	chr8:36572145-36577269-	exon sense-overlapping	ENSMUST00000033923	Dlc1	chr8:36567751-36613943-
chr9	122160134	122160535	MACS_peak_193163	66.54	401	ENSMUST00000131169	Snrk	66.54	3.04	30.64	Ensembl	755	chr9:122160072-122166391+	exon sense-overlapping	ENSMUST00000118886	Snrk	chr9:122117375-122168067+
chr3	85971108	85971424	MACS_peak_88206	66.01	316	ENSMUST00000182969	Sh3d19	66.01	6.02	57.97	Ensembl	616	chr3:85971109-86083538+	exon sense-overlapping	ENSMUST00000182666	Sh3d19	chr3:86070915-86130526+
chr1	180118307	180118636	MACS_peak_10448	65.88	329	ENSMUST00000152582	Cdc42bpa	65.88	4.27	38.42	Ensembl	3900	chr1:180107017-180118957+	exon sense-overlapping	ENSMUST00000076687	Cdc42bpa	chr1:179961110-180162166+
chr15	81957600	81957910	MACS_peak_50510	65.79	310	ENSMUST00000147442	Pmm1	65.79	2.23	58.08	Ensembl	620	chr15:81957341-81960764-	exon sense-overlapping	ENSMUST00000023112	Pmm1	chr15:81951108-81960930-
chr15	86159100	86159468	MACS_peak_66895	65.56	368	ENSMUST00000150767	Cerk	65.56	6.6	30.79	Ensembl	3896	chr15:86139128-86159468-	exon sense-overlapping	ENSMUST00000044332	Cerk	chr15:86139129-86186141-
chr5	135635994	135636545	MACS_peak_146237	65.29	551	ENSMUST00000129134	Rhbdd2	65.29	4.74	30.79	Ensembl	867	chr5:135632723-135636545+	exon sense-overlapping	ENSMUST00000043707	Rhbdd2	chr5:135632618-135646376+
chr4	102927189	102927585	MACS_peak_127792	65.2	396	ENSMUST00000141624	Sgip1	65.2	4.06	30.82	Ensembl	523	chr4:102927190-102928912+	exon sense-overlapping	ENSMUST00000066824	Sgip1	chr4:102760135-102971983+
chr1	172505119	172505934	MACS_peak_8674	65.2	815	ENSMUST00000138296	Tagln2	65.2	4.9	57.25	Ensembl	1101	chr1:172500047-172505934+	exon sense-overlapping	ENSMUST00000111228	Tagln2	chr1:172501252-172506733+
chr7	143713495	143714008	MACS_peak_147385	64.96	513	ENSMUST00000153864	Osbpl5	64.96	9.15	38.57	Ensembl	700	chr7:143713496-143740299-	exon sense-overlapping	ENSMUST00000020411	Osbpl5	chr7:143688762-143741963-
chr3	87207540	87208005	MACS_peak_88347	64.74	465	ENSMUST00000098980	Gm10705	64.74	7.08	57.65	Ensembl	465	chr3:87207541-87208005-	intergenic	NA	NA	NA
chr11	3332864	3333412	MACS_peak_17757	64.33	548	ENSMUST00000153733	Pik3ip1	64.33	5.09	57.67	Ensembl	2168	chr11:3330793-3333962+	exon sense-overlapping	ENSMUST00000045153	Pik3ip1	chr11:3330401-3342971+
chr4	124849595	124850330	MACS_peak_130071	64.14	735	ENSMUST00000184704	1110065P20Rik	64.14	7.88	31	Ensembl	1251	chr4:124849080-124850330-	exon sense-overlapping	ENSMUST00000106190	1110065P20Rik	chr4:124849485-124850809-
chr10	130412934	130413312	MACS_peak_17713	64.07	378	ENSMUST00000075147	Gm9770	64.07	5.33	57.63	Ensembl	810	chr10:130412499-130413312+	intergenic	NA	NA	NA
chr17	5816294	5816700	MACS_peak_66211	64.06	406	ENSMUST00000089182	Gm10231	64.06	4.54	38.89	Ensembl	647	chr17:5816054-5816700-	intergenic	NA	NA	NA
chr5	117936219	117936587	MACS_peak_109811	63.94	368	ENSMUST00000182216	Gm26995	63.94	4.79	57.66	Ensembl	1306	chr5:117935725-117939518-	natural antisense	ENSMUST00000102557	Nos1	chr5:117867114-117953909+
chr9	102348862	102349193	MACS_peak_190968	63.91	331	ENSMUST00000181865	Gm26846	63.91	6.33	29.95	Ensembl	4869	chr9:102345903-102354694+	natural antisense	ENSMUST00000035129	Ephb1	chr9:101922128-102354693-
chr5	128988801	128989158	MACS_peak_111015	63.56	357	ENSMUST00000128448	Stx2	63.56	5.38	57.81	Ensembl	758	chr5:128986155-128989158-	exon sense-overlapping	ENSMUST00000031378	Stx2	chr5:128984557-129008574-
chr1	105457543	105458102	MACS_peak_6910	63.43	559	ENSMUST00000086725	Gm3608	63.43	6.73	30.02	Ensembl	2858	chr1:105455971-105458829+	intergenic	NA	NA	NA
chr11	98892062	98892840	MACS_peak_32153	63.2	778	ENSMUST00000132006	Wipf2	63.2	4.91	30.04	Ensembl	1846	chr11:98864117-98892840+	exon sense-overlapping	ENSMUST00000037480	Wipf2	chr11:98863638-98905040+
chr2	58583303	58583768	MACS_peak_86560	63.12	465	ENSMUST00000137007	Upp2	63.12	7.83	37.81	Ensembl	690	chr2:58567318-58583782+	exon sense-overlapping	ENSMUST00000071543	Upp2	chr2:58567387-58792971+
chr4	144587894	144588301	MACS_peak_113915	62.9	407	ENSMUST00000118978	Gm13127	62.9	8.1	37.88	Ensembl	1389	chr4:144587244-144588632+	intergenic	NA	NA	NA
chr5	92962126	92962539	MACS_peak_121208	62.89	413	ENSMUST00000172752	Shroom3	62.89	6.57	37.87	Ensembl	1027	chr5:92962039-92964790+	exon sense-overlapping	ENSMUST00000113051	Shroom3	chr5:92897993-92965308+
chr16	23971264	23971599	MACS_peak_71132	62.79	335	ENSMUST00000135352	Bcl6	62.79	5.59	30.11	Ensembl	3933	chr16:23967694-23972380-	exon sense-overlapping	ENSMUST00000023151	Bcl6	chr16:23965052-23988852-
chr4	94935620	94936103	MACS_peak_108828	62.77	483	ENSMUST00000121965	Gm12693	62.77	8.64	37.91	Ensembl	483	chr4:94935621-94936103+	intergenic	NA	NA	NA
chr6	113488070	113488408	MACS_peak_156284	62.68	338	ENSMUST00000156764	Creld1	62.68	5.02	30.11	Ensembl	643	chr6:113483855-113488408+	exon sense-overlapping	ENSMUST00000032422	Creld1	chr6:113483297-113493338+
chr10	81251123	81252108	MACS_peak_16575	62.57	985	ENSMUST00000132174	Zfr2	62.57	4.09	37.93	Ensembl	4525	chr10:81233187-81252121+	exon sense-overlapping	ENSMUST00000117798	Zfr2	chr10:81233155-81252123+
chr13	42868748	42869054	MACS_peak_40361	62.32	306	ENSMUST00000162331	Gm15812	62.32	5.95	38.02	Ensembl	889	chr13:42868338-42869226-	intronic antisense	ENSMUST00000066928	Phactr1	chr13:42709543-43135401+
chr13	69809913	69810493	MACS_peak_37743	62.18	580	ENSMUST00000180656	Gm26819	62.18	4.24	58.37	Ensembl	5128	chr13:69809914-69816094-	natural antisense	ENSMUST00000022089	Med10	chr13:69809882-69816094+
chr12	3236974	3237412	MACS_peak_35245	61.78	438	uc007mwj.2	Rab10os	61.78	6.3	30.27	UCSC_knowngene	2869	chr12:3235526-3250374+	natural antisense	ENSMUST00000021001	Rab10	chr12:3247430-3309969-
chr11	74665006	74665426	MACS_peak_22198	61.38	420	ENSMUST00000155558	Cluh	61.38	4.21	58.8	Ensembl	6098	chr11:74649540-74670847+	exon sense-overlapping	ENSMUST00000092915	Cluh	chr11:74649515-74670847+
chrX	152297642	152297956	MACS_peak_170448	61.38	314	NR_040269	Kantr	61.38	6.49	38.25	RefSeq	4258	chrX:152294824-152327493-	intergenic	NA	NA	NA
chr16	90143241	90144479	MACS_peak_57810	61.14	1238	NR_033476	Gm10789	61.14	7.47	58.96	RefSeq	4591	chr16:90142237-90146827+	intergenic	NA	NA	NA
chr12	55395706	55396056	MACS_peak_38856	61.12	350	ENSMUST00000161190	Rpl18a-ps1	61.12	5.3	30.42	Ensembl	523	chr12:55395707-55396229-	intronic antisense	ENSMUST00000163070	Psma6	chr12:55384222-55418310+
chr2	125136261	125136619	MACS_peak_105583	60.96	358	uc008mcd.1	AK030357	60.96	5.6	30.43	UCSC_knowngene	2933	chr2:125131557-125136619-	bidirectional	ENSMUST00000099452	Ctxn2	chr2:125136692-125147839+
chr19	6986773	6987140	MACS_peak_78913	60.9	367	ENSMUST00000147924	Vegfb	60.9	4.25	38.34	Ensembl	460	chr19:6986394-6987140-	exon sense-overlapping	ENSMUST00000025914	Vegfb	chr19:6982473-6987651-
chr5	116446489	116446844	MACS_peak_143454	60.45	355	ENSMUST00000139425	Srrm4	60.45	4.62	30.51	Ensembl	2798	chr5:116442432-116446844-	exon sense-overlapping	ENSMUST00000076124	Srrm4	chr5:116439272-116591817-
chr3	95231784	95232381	MACS_peak_100220	59.95	597	ENSMUST00000149804	Cdc42se1	59.95	3.96	38.59	Ensembl	653	chr3:95228810-95232381+	exon sense-overlapping	ENSMUST00000053872	Cdc42se1	chr3:95228732-95236409+
chr3	63980820	63981189	MACS_peak_98510	59.7	369	ENSMUST00000163074	Gmps	59.7	5.93	38.66	Ensembl	3418	chr3:63976210-63983452+	exon sense-overlapping	ENSMUST00000029405	Gmps	chr3:63976106-64022579+
chr15	65928453	65928933	MACS_peak_49002	59.32	480	ENSMUST00000173338	Gm2991	59.32	5.46	58.29	Ensembl	480	chr15:65928454-65928933-	intron sense-overlapping	ENSMUST00000100584	Hhla1	chr15:65922443-65976804-
chr4	145466616	145467319	MACS_peak_113993	59.24	703	NR_002888	Smarca5-ps	59.24	7.91	38.82	RefSeq	3752	chr4:145464210-145467961+	intergenic	NA	NA	NA
chr7	126959046	126959451	MACS_peak_129764	59.05	405	ENSMUST00000125669	Sez6l2	59.05	4.31	58.39	Ensembl	641	chr7:126953867-126959451+	exon sense-overlapping	ENSMUST00000106332	Sez6l2	chr7:126950966-126970270+
chr10	80826681	80828633	MACS_peak_14565	58.92	1952	ENSMUST00000179894	Oaz1	58.92	9.66	58.38	Ensembl	2526	chr10:80826682-80829284+	exon sense-overlapping	ENSMUST00000060987	Oaz1	chr10:80826656-80829290+
chr12	109748150	109749425	MACS_peak_43471	58.5	1275	ENSMUST00000183084	Mirg	58.5	5.2	31.05	Ensembl	1553	chr12:109747903-109749455+	intergenic	NA	NA	NA
chr6	48529825	48530440	MACS_peak_151613	58.45	615	NR_015597	Zfp862-ps	58.45	6.28	31.03	RefSeq	6189	chr6:48504339-48534831+	intergenic	NA	NA	NA
chr12	109695585	109696129	MACS_peak_33405	58.35	544	ENSMUST00000182785	B830012L14Rik	58.35	9.85	58.69	Ensembl	4505	chr12:109695586-109702587+	intergenic	NA	NA	NA
chr16	14067402	14068006	MACS_peak_53730	58.34	604	ENSMUST00000119046	Gm15808	58.34	5.46	58.69	Ensembl	604	chr16:14067403-14068006+	intron sense-overlapping	ENSMUST00000056521	2900011O08Rik	chr16:13986604-14101500+
chr4	44123188	44123629	MACS_peak_123929	57.91	441	NR_040414	Gm12504	57.91	5.3	31.12	RefSeq	2231	chr4:44121893-44124123+	intergenic	NA	NA	NA
chr6	49424267	49424637	MACS_peak_151679	57.87	370	ENSMUST00000172394	Gm17060	57.87	6.73	29.94	Ensembl	824	chr6:49424061-49424884-	intronic antisense	ENSMUST00000024171	Stk31	chr6:49395604-49469501+
chr4	124681630	124682323	MACS_peak_111366	57.8	693	ENSMUST00000153088	Utp11l	57.8	5.86	39.29	Ensembl	4008	chr4:124678797-124693534-	exon sense-overlapping	ENSMUST00000030738	Utp11l	chr4:124678160-124693600-
chr15	34958713	34959076	MACS_peak_47688	57.46	363	ENSMUST00000128425	Stk3	57.46	3.59	59.25	Ensembl	605	chr15:34958564-34999922-	exon sense-overlapping	ENSMUST00000018476	Stk3	chr15:34875496-35155806-
chr18	37957430	37959654	MACS_peak_86945	57.4	2224	ENSMUST00000165643	Fchsd1	57.4	4.73	30.08	Ensembl	2918	chr18:37957431-37960471-	exon sense-overlapping	ENSMUST00000043437	Fchsd1	chr18:37957434-37969774-
chr11	67603107	67603427	MACS_peak_28508	57.33	320	ENSMUST00000145496	Gas7	57.33	4.25	30.07	Ensembl	2628	chr11:67586500-67605419+	exon sense-overlapping	ENSMUST00000041611	Gas7	chr11:67547154-67684974+
chr6	48524512	48525105	MACS_peak_115816	57.28	593	ENSMUST00000056948	Gm7887	57.28	6.5	59.31	Ensembl	734	chr6:48524372-48525105-	intergenic	NA	NA	NA
chr2	25585188	25585536	MACS_peak_84027	57.01	348	ENSMUST00000135084	Rabl6	57.01	6.84	37.9	Ensembl	548	chr2:25585189-25585823-	exon sense-overlapping	ENSMUST00000058137	Rabl6	chr2:25583018-25608521-
chr6	121378959	121379909	MACS_peak_135301	56.61	950	NR_110358	Iqsec3	56.61	5.61	38.02	RefSeq	7540	chr6:121372928-121473678-	exon sense-overlapping	ENSMUST00000046373	Iqsec3	chr6:121372933-121473678-
chr6	127282099	127282486	MACS_peak_157791	56.23	387	ENSMUST00000121087	Gm7308	56.23	2.77	30.19	Ensembl	447	chr6:127282063-127282509-	intergenic	NA	NA	NA
chr16	30540738	30542386	MACS_peak_54787	55.84	1648	ENSMUST00000125260	Tmem44	55.84	6.3	59.61	Ensembl	3875	chr16:30517730-30550539-	exon sense-overlapping	ENSMUST00000140402	Tmem44	chr16:30513691-30550578-
chr13	98904223	98904528	MACS_peak_50739	55.63	305	ENSMUST00000080866	Gm5453	55.63	4.99	30.26	Ensembl	447	chr13:98904224-98904670+	intronic antisense	ENSMUST00000109401	Tnpo1	chr13:98839019-98926384-
chr17	7764781	7765398	MACS_peak_77422	55.42	617	ENSMUST00000114579	Fndc1	55.42	5.17	30.29	Ensembl	4054	chr17:7761300-7767675-	exon sense-overlapping	ENSMUST00000097425	Fndc1	chr17:7738569-7804974-
chr16	32923217	32923915	MACS_peak_61835	55.29	698	ENSMUST00000163830	Gm6611	55.29	4.53	38.5	Ensembl	1272	chr16:32923218-32924489+	intron sense-overlapping	ENSMUST00000023491	Lrch3	chr16:32914100-33015647+
chr5	135857037	135857509	MACS_peak_146288	55.26	472	ENSMUST00000135615	Srrm3	55.26	6	30.34	Ensembl	681	chr5:135854414-135857509+	exon sense-overlapping	ENSMUST00000144211	Srrm3	chr5:135818106-135874772+
chrY	1016070	1016843	MACS_peak_199019	55.17	773	ENSMUST00000148961	Eif2s3y	55.17	5.05	30.37	Ensembl	3114	chrY:1010595-1028847+	exon sense-overlapping	ENSMUST00000091197	Eif2s3y	chrY:1010543-1028594+
chr11	32216141	32216461	MACS_peak_19171	55.01	320	ENSMUST00000143036	Rhbdf1	55.01	4.87	60.07	Ensembl	5089	chr11:32209586-32217317-	exon sense-overlapping	ENSMUST00000020524	Rhbdf1	chr11:32209585-32222300-
chr2	180082085	180082751	MACS_peak_111290	54.98	666	uc012clv.1	Mtg2	54.98	8.09	30.39	UCSC_knowngene	2087	chr2:180070593-180085902+	exon sense-overlapping	ENSMUST00000087563	Mtg2	chr2:180078623-180085902+
chr2	85050607	85050973	MACS_peak_88199	54.81	366	ENSMUST00000126309	Tnks1bp1	54.81	6.12	38.62	Ensembl	5885	chr2:85050608-85073038+	exon sense-overlapping	ENSMUST00000048400	Tnks1bp1	chr2:85058159-85073048+
chr7	126930491	126930802	MACS_peak_169851	54.7	311	ENSMUST00000141369	Kctd13	54.7	3.31	30.43	Ensembl	920	chr7:126929921-126941370+	exon sense-overlapping	ENSMUST00000032924	Kctd13	chr7:126928879-126945631+
chr12	108880755	108881151	MACS_peak_33350	54.64	396	ENSMUST00000160974	Wars	54.64	7.04	60.36	Ensembl	652	chr12:108880756-108888417-	exon sense-overlapping	ENSMUST00000109848	Wars	chr12:108860030-108894174-
chr2	73845733	73846375	MACS_peak_77985	54.56	642	ENSMUST00000129555	Atf2	54.56	3.87	60.38	Ensembl	658	chr2:73845734-73850604-	exon sense-overlapping	ENSMUST00000055833	Atf2	chr2:73816509-73892614-
chr1	143683229	143684298	MACS_peak_6927	53.88	1069	ENSMUST00000161973	Gm6397	53.88	6.65	59.11	Ensembl	1069	chr1:143683230-143684298+	intronic antisense	ENSMUST00000018337	Cdc73	chr1:143598797-143702893-
chrX	157016078	157017457	MACS_peak_151405	53.77	1379	ENSMUST00000054322	Gm15163	53.77	9.04	59.19	Ensembl	2143	chrX:157015331-157120545-	intergenic	NA	NA	NA
chrX	101768534	101769057	MACS_peak_150138	53.65	523	ENSMUST00000121768	Tpt1-ps6	53.65	8.53	59.27	Ensembl	523	chrX:101768535-101769057+	intergenic	NA	NA	NA
chr7	140881572	140882037	MACS_peak_147113	53.56	465	uc029wpl.1	AK165407	53.56	5.94	39.03	UCSC_knowngene	1223	chr7:140881074-140882296-	exon sense-overlapping	ENSMUST00000026559	Sirt3	chr7:140863670-140882309-
chr10	93284605	93284977	MACS_peak_15778	53.51	372	ENSMUST00000133365	Elk3	53.51	5.09	59.28	Ensembl	931	chr10:93284431-93311135-	exon sense-overlapping	ENSMUST00000008542	Elk3	chr10:93247414-93311135-
chrX	7596730	7597732	MACS_peak_166692	53.44	1002	ENSMUST00000126170	Ppp1r3f	53.44	6.6	39.1	Ensembl	5727	chrX:7558602-7605381-	exon sense-overlapping	ENSMUST00000033483	Ccdc22	chrX:7593809-7605517-
chr5	147519433	147519752	MACS_peak_127244	52.91	319	ENSMUST00000177328	Pan3	52.91	3.84	39.25	Ensembl	727	chr5:147519434-147527007+	exon sense-overlapping	ENSMUST00000031651	Pan3	chr5:147430161-147548502+
chr7	76245096	76245938	MACS_peak_125919	52.89	842	ENSMUST00000182353	Gm5597	52.89	4.91	59.53	Ensembl	1193	chr7:76244746-76245938-	intronic antisense	NM_001199224	Agbl1	chr7:76229887-77124698+
chr11	69587371	69588080	MACS_peak_21801	52.74	709	ENSMUST00000147512	Trp53	52.74	3.87	59.6	Ensembl	3275	chr11:69580402-69590505+	exon sense-overlapping	ENSMUST00000005371	Trp53	chr11:69580359-69591873+
chr8	123126255	123126854	MACS_peak_138811	52.4	599	ENSMUST00000131659	Cpne7	52.4	5.46	59.6	Ensembl	3542	chr8:123117447-123135182+	exon sense-overlapping	ENSMUST00000037900	Cpne7	chr8:123117378-123135182+
chr6	54489007	54489476	MACS_peak_116175	52.36	469	ENSMUST00000131043	Wipf3	52.36	4.47	59.6	Ensembl	2660	chr6:54487906-54491542+	exon sense-overlapping	ENSMUST00000126637	Wipf3	chr6:54429603-54503765+
chr18	89294512	89295540	MACS_peak_78273	52.32	1028	uc008fvq.1	AK083197	52.32	5.46	39.49	UCSC_knowngene	4806	chr18:89292424-89297229-	intergenic	NA	NA	NA
chr8	20267461	20268043	MACS_peak_173315	52.21	582	uc029wqx.1	6820431F20Rik	52.21	4.96	30.89	UCSC_knowngene	582	chr8:20267462-20268043-	intergenic	NA	NA	NA
chr8	111138815	111139237	MACS_peak_155032	52.17	422	uc009nlz.2	AB351656	52.17	3.75	39.54	UCSC_knowngene	2380	chr8:111137363-111139742+	intergenic	NA	NA	NA
chr11	97213571	97213878	MACS_peak_27531	52.16	307	ENSMUST00000170506	Npepps	52.16	3.06	39.53	Ensembl	865	chr11:97213537-97224761-	exon sense-overlapping	ENSMUST00000001480	Npepps	chr11:97205844-97280638-
chr11	6265431	6265756	MACS_peak_20592	52.06	325	ENSMUST00000139073	Ddx56	52.06	4.74	39.61	Ensembl	527	chr11:6265307-6266392-	exon sense-overlapping	ENSMUST00000004507	Ddx56	chr11:6258919-6267772-
chr4	53877924	53878269	MACS_peak_124766	52.05	345	ENSMUST00000116189	Gm12468	52.05	6.33	29.91	Ensembl	404	chr4:53877925-53878328+	intergenic	NA	NA	NA
chr19	7398420	7399077	MACS_peak_91822	51.94	657	ENSMUST00000178377	Rab11b-ps2	51.94	6.93	29.92	Ensembl	657	chr19:7398421-7399077-	intergenic	NA	NA	NA
chr3	54734295	54734802	MACS_peak_87021	51.88	507	ENSMUST00000134892	Exosc8	51.88	6.21	59.67	Ensembl	985	chr3:54729841-54734802-	exon sense-overlapping	ENSMUST00000029316	Exosc8	chr3:54728678-54735393-
chr15	73644983	73645345	MACS_peak_55656	51.79	362	ENSMUST00000150409	Slc45a4	51.79	5.46	39.73	Ensembl	581	chr15:73605948-73645345-	exon sense-overlapping	ENSMUST00000054266	Slc45a4	chr15:73580293-73624744-
chr14	69565735	69566663	MACS_peak_49560	51.38	928	ENSMUST00000183906	Gm21685	51.38	4.29	39.82	Ensembl	2946	chr14:69555440-69568582+	exon sense-overlapping	ENSMUST00000064846	Gm21685	chr14:69555448-69568583+
chr7	24923247	24923970	MACS_peak_137967	51.3	723	ENSMUST00000126484	Arhgef1	51.3	4.43	39.86	Ensembl	775	chr7:24923248-24924847+	exon sense-overlapping	ENSMUST00000047873	Arhgef1	chr7:24903037-24926589+
chr1	133250822	133251317	MACS_peak_6501	51.05	495	NR_037984	Gm19461	51.05	5.46	59.91	RefSeq	3112	chr1:133249852-133269808-	intronic antisense	ENSMUST00000038295	Plekha6	chr1:133246097-133303435+
chr11	5784169	5784676	MACS_peak_23874	50.96	507	NR_015577	2210015D19Rik	50.96	5.27	30.14	RefSeq	1840	chr11:5762150-5784710+	natural antisense	ENSMUST00000053427	Urgcp	chr11:5713417-5762376-
chr8	123245113	123245712	MACS_peak_156405	50.84	599	ENSMUST00000146136	Vps9d1	50.84	3.9	40.09	Ensembl	3078	chr8:123242358-123254163-	exon sense-overlapping	ENSMUST00000117643	Vps9d1	chr8:123242356-123254176-
chr10	86304833	86305482	MACS_peak_20193	50.77	649	ENSMUST00000151134	Timp3	50.77	4.89	30.17	Ensembl	3368	chr10:86300554-86306781+	exon sense-overlapping	ENSMUST00000020234	Timp3	chr10:86300372-86349506+
chr8	120572635	120573071	MACS_peak_156067	50.65	436	ENSMUST00000147327	Gse1	50.65	4.61	38.52	Ensembl	809	chr8:120571281-120573272+	exon sense-overlapping	ENSMUST00000034279	Gse1	chr8:120488447-120581390+
chr9	66592448	66593036	MACS_peak_188488	50.32	588	uc009qfa.1	BC053974	50.32	5.03	30.28	UCSC_knowngene	1509	chr9:66592449-66593957-	exon sense-overlapping	ENSMUST00000098613	Usp3	chr9:66517227-66593036-
chr16	4786112	4786580	MACS_peak_59176	50.3	468	uc007yal.1	AK153988	50.3	5.93	38.65	UCSC_knowngene	4542	chr16:4785394-4789935-	exon sense-overlapping	ENSMUST00000004173	Cdip1	chr16:4765461-4789990-
chr10	105574550	105575615	MACS_peak_18226	806.18	1065	NR_038032	Gm15663	806.18	32.26	18.51	RefSeq	3204	chr10:105574551-105583870+	bidirectional	ENSMUST00000061506	Tmtc2	chr10:105187663-105574435-
chr4	107890226	107890549	MACS_peak_128554	668.78	323	ENSMUST00000127715	0610037L13Rik	668.78	29.95	14.97	Ensembl	825	chr4:107890227-107897057+	exon sense-overlapping	ENSMUST00000106726	0610037L13Rik	chr4:107889825-107896980+
chr5	73338530	73338947	MACS_peak_139981	628.85	417	ENSMUST00000133164	Ociad2	628.85	10.42	15.21	Ensembl	490	chr5:73332128-73338947-	exon sense-overlapping	ENSMUST00000087195	Ociad2	chr5:73322199-73338593-
chr18	70606058	70606778	MACS_peak_89633	498.18	720	uc008foo.1	AK085760	498.18	18.31	17.45	UCSC_knowngene	2915	chr18:70604658-70607572+	intron sense-overlapping	ENSMUST00000074058	Mbd2	chr18:70568189-70626131+
chr2	94406150	94406966	MACS_peak_88805	403.1	816	ENSMUST00000152313	2810002D19Rik	403.1	14.8	25.54	Ensembl	2040	chr2:94406151-94411682+	natural antisense	ENSMUST00000028617	Api5	chr2:94411682-94438136-
chr2	150608263	150608695	MACS_peak_92449	394.57	432	ENSMUST00000156345	Gm14123	394.57	17.54	25.76	Ensembl	2658	chr2:150606233-150610254+	natural antisense	ENSMUST00000046399	Apmap	chr2:150583080-150608567-
chr19	29160117	29160765	MACS_peak_80113	234.82	648	ENSMUST00000084171	Gm5518	234.82	4.52	32.43	Ensembl	648	chr19:29160118-29160765+	intergenic	NA	NA	NA
chr7	45708080	45708471	MACS_peak_162206	228.01	391	ENSMUST00000123587	Dbp	228.01	7.35	25.23	Ensembl	1732	chr7:45707104-45710028+	exon sense-overlapping	ENSMUST00000080885	Dbp	chr7:45705088-45710155+
chr5	23432742	23434353	MACS_peak_135834	212.79	1611	NR_040469	5031425E22Rik	212.79	7.03	26.07	RefSeq	2546	chr5:23431808-23434353-	exon sense-overlapping	ENSMUST00000101522	5031425E22Rik	chr5:23431810-23433919-
chr5	129128019	129128571	MACS_peak_111029	168.98	552	ENSMUST00000076708	Rps16-ps2	168.98	6.54	41.55	Ensembl	552	chr5:129128020-129128571-	intronic antisense	ENSMUST00000056617	Gpr133	chr5:129096750-129204599+
chr2	180582725	180583045	MACS_peak_111350	151.33	320	ENSMUST00000130277	Mrgbp	151.33	8.46	28.45	Ensembl	3150	chr2:180582726-180586304+	exon sense-overlapping	ENSMUST00000029085	Mrgbp	chr2:180582712-180586287+
chr2	21194104	21194498	MACS_peak_74325	97.95	394	ENSMUST00000147793	Enkur	97.95	7.75	53.26	Ensembl	708	chr2:21194105-21205239-	exon sense-overlapping	ENSMUST00000027992	Enkur	chr2:21180731-21205365-
chr9	121732789	121733191	MACS_peak_166353	86.47	402	uc029xgq.1	AK052484	86.47	5.34	38.46	UCSC_knowngene	2991	chr9:121731789-121734779+	intron sense-overlapping	ENSMUST00000035112	Nktr	chr9:121719176-121756843+
chr15	76231021	76231378	MACS_peak_49677	52.69	357	ENSMUST00000165135	Plec	52.69	4.68	59.65	Ensembl	691	chr15:76230735-76232574-	exon sense-overlapping	ENSMUST00000089610	Plec	chr15:76170974-76231378-
chr11	69346373	69346813	MACS_peak_28741	3100	440	ENSMUST00000146930	Chd3	3100	11.07	11.62	Ensembl	747	chr11:69346136-69347134-	exon sense-overlapping	ENSMUST00000092971	Chd3	chr11:69344351-69369391-
chr5	112213253	112218842	MACS_peak_142739	3100	5589	NR_003718	Miat	3100	26.26	11.62	RefSeq	8716	chr5:112213228-112228948-	intergenic	NA	NA	NA
chr15	74093624	74094402	MACS_peak_65193	2953.58	778	ENSMUST00000180186	Gm15387	2953.58	8.07	11.61	Ensembl	1220	chr15:74093183-74094402-	intergenic	NA	NA	NA
chr17	34030565	34031648	MACS_peak_80091	2310.74	1083	ENSMUST00000170491	Slc39a7	2310.74	18.25	11.09	Ensembl	2433	chr17:34028273-34031648-	exon sense-overlapping	ENSMUST00000025186	Slc39a7	chr17:34028269-34031544-
chr11	50381261	50382715	MACS_peak_26797	2196.41	1454	ENSMUST00000123371	Hnrnph1	2196.41	16.77	11.3	Ensembl	4002	chr11:50377769-50385921+	exon sense-overlapping	ENSMUST00000069304	Hnrnph1	chr11:50377719-50386527+
chr14	46084125	46084815	MACS_peak_42726	1904.9	690	ENSMUST00000111388	Gm1821	1904.9	5.47	11.95	Ensembl	690	chr14:46084126-46084815+	intergenic	NA	NA	NA
chr2	25560539	25561257	MACS_peak_74579	1809.9	718	ENSMUST00000134689	Edf1	1809.9	10.76	11.85	Ensembl	910	chr2:25557897-25561264+	exon sense-overlapping	ENSMUST00000015236	Edf1	chr2:25557847-25562082+
chr2	113919296	113920562	MACS_peak_79788	1786.48	1266	ENSMUST00000178049	Gm21596	1786.48	8.49	11.75	Ensembl	1316	chr2:113919247-113920562-	intergenic	NA	NA	NA
chr3	88484046	88484607	MACS_peak_116376	1491.46	561	ENSMUST00000147537	Lmna	1491.46	13.56	11.84	Ensembl	889	chr3:88483206-88484607-	exon sense-overlapping	ENSMUST00000029699	Lmna	chr3:88481148-88503335-
chr4	3973200	3973731	MACS_peak_92242	1453.3	531	uc008rwv.1	DQ072386	1453.3	6.19	11.98	UCSC_knowngene	1025	chr4:3971119-3974055+	natural antisense	ENSMUST00000089430	Gm11808	chr4:3973107-3973581-
chr10	86691628	86692295	MACS_peak_20252	1434.48	667	ENSMUST00000129178	Hsp90b1	1434.48	6.64	11.85	Ensembl	3222	chr10:86690209-86701968-	exon sense-overlapping	ENSMUST00000020238	Hsp90b1	chr10:86690840-86705509-
chr11	98438036	98438716	MACS_peak_32103	1088	680	ENSMUST00000154452	Gm12352	1088	11.3	12.53	Ensembl	760	chr11:98438037-98439046+	natural antisense	ENSMUST00000002655	Mien1	chr11:98437708-98438991-
chr5	146231229	146231820	MACS_peak_147601	981.72	591	ENSMUST00000162494	Cdk8	981.72	8.42	12.8	Ensembl	2973	chr5:146231230-146302874+	exon sense-overlapping	ENSMUST00000031640	Cdk8	chr5:146231288-146302874+
chr10	80170424	80171204	MACS_peak_16366	947.86	780	ENSMUST00000151321	Cirbp	947.86	6.95	17.55	Ensembl	894	chr10:80170227-80171204+	exon sense-overlapping	ENSMUST00000054666	Cirbp	chr10:80167840-80172786+
chr5	114719578	114720268	MACS_peak_143194	922.94	690	ENSMUST00000124242	Tchp	922.94	15.41	12.81	Ensembl	3138	chr5:114707864-114722327+	exon sense-overlapping	ENSMUST00000094441	Tchp	chr5:114707760-114722327+
chr3	10014645	10015573	MACS_peak_95997	887	928	ENSMUST00000123744	Fabp5	887	6.09	17.68	Ensembl	3238	chr3:10012605-10016335+	exon sense-overlapping	ENSMUST00000029046	Fabp5	chr3:10012548-10016607+
chr7	141191341	141192290	MACS_peak_171004	830.11	949	ENSMUST00000128993	Hras	830.11	9.53	13.23	Ensembl	1704	chr7:141190926-141193994-	exon sense-overlapping	ENSMUST00000026572	Hras	chr7:141189105-141193960-
chr4	42950350	42953385	MACS_peak_93937	763	3035	ENSMUST00000142332	Dnajb5	763	15.64	18.75	Ensembl	5052	chr4:42950351-42958732+	exon sense-overlapping	ENSMUST00000037872	Dnajb5	chr4:42949814-42959425+
chr13	55085609	55086192	MACS_peak_36884	731.26	583	ENSMUST00000128641	Uimc1	731.26	8.59	19.15	Ensembl	654	chr13:55077457-55086192-	exon sense-overlapping	ENSMUST00000026997	Uimc1	chr13:55027880-55100295-
chrX	134585688	134586183	MACS_peak_197292	716.54	495	ENSMUST00000172023	Rpl36a	716.54	3.63	14.33	Ensembl	812	chrX:134585689-134588062+	exon sense-overlapping	ENSMUST00000113211	Rpl36a	chrX:134585654-134588056+
chr7	61290577	61291026	MACS_peak_140783	713.9	449	ENSMUST00000154958	A230006K03Rik	713.9	8.3	19.43	Ensembl	901	chr7:61282739-61311721-	intergenic	NA	NA	NA
chr5	122371875	122372399	MACS_peak_144323	710.62	524	ENSMUST00000127608	Gpn3	710.62	4.11	14.35	Ensembl	2198	chr5:122371876-122382841+	exon sense-overlapping	ENSMUST00000031420	Gpn3	chr5:122372451-122382902+
chr2	35978097	35979540	MACS_peak_85507	690.33	1443	uc008jla.1	DQ699740	690.33	19.27	19.77	UCSC_knowngene	2098	chr2:35977443-35979540-	exon sense-overlapping	ENSMUST00000028248	Ttll11	chr2:35751241-35979624-
chr1	21959841	21961060	MACS_peak_1251	689.96	1219	ENSMUST00000181002	Gm26580	689.96	10.28	14.58	Ensembl	2095	chr1:21959842-21962530+	natural antisense	ENSMUST00000029667	Kcnq5	chr1:21398403-21961581-
chr4	134470102	134470683	MACS_peak_112725	646.97	581	ENSMUST00000130253	Stmn1	646.97	7.67	20.63	Ensembl	612	chr4:134468399-134470683+	exon sense-overlapping	ENSMUST00000030636	Stmn1	chr4:134468320-134473843+
chr16	17088801	17089281	MACS_peak_60648	604.68	480	ENSMUST00000146151	Ppil2	604.68	7.13	21.09	Ensembl	708	chr16:17088606-17089459-	exon sense-overlapping	ENSMUST00000023455	Ppil2	chr16:17086555-17111257-
chr8	4202736	4203079	MACS_peak_171565	589.36	343	ENSMUST00000177309	Evi5l	589.36	9.21	16.16	Ensembl	1654	chr8:4191292-4203079+	exon sense-overlapping	ENSMUST00000176072	Evi5l	chr8:4166574-4208226+
chr4	107846200	107846619	MACS_peak_128545	574.86	419	ENSMUST00000135591	Lrp8	574.86	12.18	16.28	Ensembl	557	chr4:107846201-107848295+	exon sense-overlapping	ENSMUST00000030356	Lrp8	chr4:107802314-107873899+
chr11	23256057	23256717	MACS_peak_21188	564.96	660	ENSMUST00000149371	Xpo1	564.96	7.05	22.2	Ensembl	2902	chr11:23256058-23282726+	exon sense-overlapping	ENSMUST00000020538	Xpo1	chr11:23256041-23297597+
chr6	125153041	125153502	MACS_peak_157649	551.06	461	ENSMUST00000141230	Iffo1	551.06	10.11	16.72	Ensembl	3056	chr6:125145266-125161776+	exon sense-overlapping	ENSMUST00000051171	Iffo1	chr6:125145244-125161774+
chr10	128408315	128408843	MACS_peak_17633	518.83	528	ENSMUST00000167456	Nabp2	518.83	3.91	22.23	Ensembl	929	chr10:128401590-128408843-	exon sense-overlapping	ENSMUST00000026439	Nabp2	chr10:128401395-128409874-
chr11	120595615	120596067	MACS_peak_30506	503.75	452	ENSMUST00000156685	Alyref	503.75	10.86	23.11	Ensembl	711	chr11:120595616-120598231-	exon sense-overlapping	ENSMUST00000026125	Alyref	chr11:120592121-120598365-
chr11	70030866	70031258	MACS_peak_24812	456.01	392	ENSMUST00000138004	Dlg4	456.01	4.17	24.43	Ensembl	637	chr11:70030637-70031734+	exon sense-overlapping	ENSMUST00000018700	Dlg4	chr11:70018728-70045532+
chr11	70526543	70527193	MACS_peak_28883	429.2	650	ENSMUST00000148535	Psmb6	429.2	5.78	18.79	Ensembl	966	chr11:70526110-70527193+	exon sense-overlapping	ENSMUST00000018430	Psmb6	chr11:70525386-70527649+
chrX	103066667	103067180	MACS_peak_169200	412.94	513	ENSMUST00000128361	Pabpc1l2a-ps	412.94	8.43	25.67	Ensembl	513	chrX:103066668-103067180-	intergenic	NA	NA	NA
chr10	128548475	128548973	MACS_peak_23388	404.11	498	ENSMUST00000176966	Rpl41	404.11	5.93	19.17	Ensembl	523	chr10:128548476-128549112-	exon sense-overlapping	ENSMUST00000176010	Rpl41	chr10:128548114-128549305-
chr9	108509908	108510346	MACS_peak_191786	393.72	438	ENSMUST00000141201	Qars	393.72	6.79	19.37	Ensembl	2615	chr9:108508058-108511071+	exon sense-overlapping	ENSMUST00000006838	Qars	chr9:108508005-108515941+
chr4	141019707	141020489	MACS_peak_132393	388.26	782	ENSMUST00000122846	Crocc	388.26	11.32	19.51	Ensembl	2186	chr4:141016637-141022124-	exon sense-overlapping	ENSMUST00000040222	Crocc	chr4:141016640-141053661-
chr5	34651860	34652477	MACS_peak_137251	382.6	617	ENSMUST00000134467	Gm15522	382.6	7.98	19.73	Ensembl	785	chr5:34650718-34652477+	natural antisense	ENSMUST00000041364	Nop14	chr5:34638532-34660148-
chr4	33924592	33925158	MACS_peak_105317	378.29	566	ENSMUST00000133462	Cnr1	378.29	10.36	26.27	Ensembl	757	chr4:33924593-33935316+	exon sense-overlapping	ENSMUST00000057188	Cnr1	chr4:33924632-33948831+
chr6	38554979	38555333	MACS_peak_150790	377.85	354	ENSMUST00000160922	Luc7l2	377.85	16.83	19.82	Ensembl	3448	chr6:38551531-38558049+	exon sense-overlapping	ENSMUST00000057692	Luc7l2	chr6:38551465-38609470+
chr7	127232417	127233130	MACS_peak_129789	376.9	713	NR_030674	Gm4532	376.9	8.15	26.88	RefSeq	713	chr7:127232418-127233130-	natural antisense	ENSMUST00000106312	Zfp553	chr7:127233061-127238179+
chr2	163721127	163721866	MACS_peak_83693	375.06	739	ENSMUST00000147385	Pkig	375.06	7.89	26.97	Ensembl	2808	chr2:163658386-163723758+	exon sense-overlapping	ENSMUST00000064703	Pkig	chr2:163658399-163726154+
chr5	8367010	8367361	MACS_peak_134692	373.96	351	ENSMUST00000143929	Adam22	373.96	6.12	19.86	Ensembl	705	chr5:8366942-8368160-	exon sense-overlapping	ENSMUST00000046838	Adam22	chr5:8092260-8368077-
chr6	134566642	134566965	MACS_peak_135897	361.52	323	ENSMUST00000126836	Lrp6	361.52	9.93	26.86	Ensembl	722	chr6:134511284-134566965-	exon sense-overlapping	ENSMUST00000032322	Lrp6	chr6:134446476-134566913-
chr2	92389901	92391141	MACS_peak_78726	360.41	1240	ENSMUST00000149653	Mapk8ip1	360.41	12.07	27.39	Ensembl	1816	chr2:92389902-92392732-	exon sense-overlapping	ENSMUST00000050312	Mapk8ip1	chr2:92383680-92401263-
chr10	128563151	128563705	MACS_peak_23389	360.23	554	ENSMUST00000147068	Pa2g4	360.23	10.51	20.21	Ensembl	684	chr10:128563152-128565869-	exon sense-overlapping	ENSMUST00000026425	Pa2g4	chr10:128557766-128565934-
chr17	33952220	33952591	MACS_peak_80079	350.38	371	ENSMUST00000174175	Rps18	350.38	3.81	20.57	Ensembl	632	chr17:33952000-33955660-	exon sense-overlapping	ENSMUST00000008812	Rps18	chr17:33951999-33955717-
chr4	145837218	145837976	MACS_peak_132877	343.17	758	NR_033612	Gm13238	343.17	10.76	20.83	RefSeq	774	chr4:145837219-145837992+	intergenic	NA	NA	NA
chr5	72914417	72915582	MACS_peak_120194	331.35	1165	ENSMUST00000183284	Slain2	331.35	6.29	27.92	Ensembl	4068	chr5:72914418-72918485+	exon sense-overlapping	ENSMUST00000143829	Slain2	chr5:72914625-72978829+
chr17	34021682	34023194	MACS_peak_61217	324.59	1512	ENSMUST00000174054	Ring1	324.59	10.29	29.28	Ensembl	2552	chr17:34021084-34023932-	exon sense-overlapping	ENSMUST00000025183	Ring1	chr17:34020792-34024680-
chr7	109027222	109027870	MACS_peak_128174	296.47	648	ENSMUST00000147943	Tub	296.47	9.4	30.14	Ensembl	747	chr7:109027223-109029360+	exon sense-overlapping	ENSMUST00000033341	Tub	chr7:109010825-109034460+
chr2	72483563	72484016	MACS_peak_87615	294.06	453	ENSMUST00000130730	Cdca7	294.06	6.83	29.69	Ensembl	598	chr2:72483564-72484743+	exon sense-overlapping	ENSMUST00000102691	Cdca7	chr2:72476159-72486893+
chr7	45459083	45459463	MACS_peak_162167	292.77	380	ENSMUST00000155582	Ftl1	292.77	6.02	22.43	Ensembl	825	chr7:45457965-45459463-	exon sense-overlapping	ENSMUST00000094434	Ftl1	chr7:45457944-45459884-
chr8	124862724	124863703	MACS_peak_139096	289.38	979	uc009nxr.1	AK148282	289.38	6.6	30.35	UCSC_knowngene	1119	chr8:124831698-124863703+	exon sense-overlapping	ENSMUST00000034466	Gnpat	chr8:124863033-124890057+
chr5	63648700	63650893	MACS_peak_106035	288	2193	uc008xmc.1	BC079612	288	7.55	30.47	UCSC_knowngene	4723	chr5:63646171-63650893-	exon sense-overlapping	ENSMUST00000067917	Gm9954	chr5:63649950-63650264-
chr2	29938494	29938955	MACS_peak_98295	279.96	461	ENSMUST00000154490	Gle1	279.96	5.02	22.75	Ensembl	860	chr2:29935428-29938955+	exon sense-overlapping	ENSMUST00000019859	Gle1	chr2:29935426-29960371+
chr12	76802879	76803628	MACS_peak_40147	265.45	749	ENSMUST00000134124	Rab15	265.45	5.3	23.52	Ensembl	1079	chr12:76802880-76822462-	exon sense-overlapping	ENSMUST00000021459	Rab15	chr12:76797960-76822553-
chr2	31797562	31797916	MACS_peak_98592	264.38	354	ENSMUST00000124726	Abl1	264.38	9.62	23.49	Ensembl	847	chr2:31796646-31797992+	exon sense-overlapping	ENSMUST00000028190	Abl1	chr2:31759943-31804227+
chr2	181364013	181365334	MACS_peak_111467	256.7	1321	ENSMUST00000152580	Arfrp1	256.7	9.87	23.75	Ensembl	1822	chr2:181359315-181365334-	exon sense-overlapping	ENSMUST00000108808	Arfrp1	chr2:181359100-181365351-
chr1	134423957	134424922	MACS_peak_6609	253.79	965	ENSMUST00000148822	Adipor1	253.79	8.81	32.37	Ensembl	2231	chr1:134415564-134426917+	exon sense-overlapping	ENSMUST00000027727	Adipor1	chr1:134415378-134433351+
chr10	80412626	80413062	MACS_peak_14487	248.8	436	ENSMUST00000129027	Tcf3	248.8	6.26	32.99	Ensembl	819	chr10:80412627-80415487-	exon sense-overlapping	ENSMUST00000020377	Tcf3	chr10:80409608-80433621-
chr13	13232157	13232895	MACS_peak_34656	247.69	738	ENSMUST00000074863	Gm2423	247.69	7.28	33.11	Ensembl	738	chr13:13232158-13232895-	intergenic	NA	NA	NA
chr2	32535331	32536232	MACS_peak_75414	237.65	901	ENSMUST00000136816	Fam102a	237.65	6.54	33.89	Ensembl	5935	chr2:32535332-32569750+	exon sense-overlapping	ENSMUST00000048375	Fam102a	chr2:32535359-32569756+
chr4	146224035	146224613	MACS_peak_132885	223.74	578	ENSMUST00000118554	Gm13167	223.74	5.97	25.45	Ensembl	578	chr4:146224036-146224613-	intergenic	NA	NA	NA
chr13	94358527	94358923	MACS_peak_43324	222.15	396	NR_045619	Gm9776	222.15	7.79	33.32	RefSeq	2187	chr13:94356749-94358923-	exon sense-overlapping	ENSMUST00000059598	Gm9776	chr13:94355839-94358818-
chr11	6006287	6006759	MACS_peak_20538	219.03	472	uc007hxv.1	BC019819	219.03	5.51	33.62	UCSC_knowngene	2041	chr11:6006288-6008328+	intronic antisense	ENSMUST00000002817	Camk2b	chr11:5971672-6065742-
chr19	5602192	5602867	MACS_peak_91483	210.48	675	ENSMUST00000127071	Rnaseh2c	210.48	6.61	26.12	Ensembl	869	chr19:5601887-5602867+	exon sense-overlapping	ENSMUST00000025864	Rnaseh2c	chr19:5601873-5603439+
chr3	75878645	75879008	MACS_peak_99002	209.62	363	ENSMUST00000134219	Golim4	209.62	12.14	33.89	Ensembl	2062	chr3:75876479-75879008-	exon sense-overlapping	ENSMUST00000038563	Golim4	chr3:75876383-75956929-
chr17	46122723	46123024	MACS_peak_61664	207.3	301	ENSMUST00000131943	Mrps18a	207.3	4.24	37.1	Ensembl	571	chr17:46110995-46123127+	exon sense-overlapping	ENSMUST00000024763	Mrps18a	chr17:46110986-46128910+
chr18	65992884	65993207	MACS_peak_67947	205.7	323	ENSMUST00000144793	Lman1	205.7	3.58	37.29	Ensembl	2139	chr18:65991151-65993660-	exon sense-overlapping	ENSMUST00000048260	Lman1	chr18:65980754-66002637-
chr15	99309684	99310035	MACS_peak_52060	204.76	351	ENSMUST00000130575	Prpf40b	204.76	9.02	37.37	Ensembl	2740	chr15:99295241-99316114+	exon sense-overlapping	ENSMUST00000023745	Prpf40b	chr15:99303283-99316499+
chr16	91671348	91672580	MACS_peak_76090	201.18	1232	uc007zya.1	Son	201.18	6.44	26.51	UCSC_knowngene	10879	chr16:91654611-91679192+	exon sense-overlapping	ENSMUST00000114036	Son	chr16:91647880-91664033+
chrX	146175941	146176577	MACS_peak_170189	192.39	636	ENSMUST00000117548	Hmgb1-ps2	192.39	5	34.84	Ensembl	636	chrX:146175942-146176577+	intergenic	NA	NA	NA
chr2	150815321	150815710	MACS_peak_82346	192.07	389	ENSMUST00000154366	Pygb	192.07	5.65	38.87	Ensembl	659	chr2:150815322-150817760+	exon sense-overlapping	ENSMUST00000045441	Pygb	chr2:150786735-150831758+
chr10	93265364	93266778	MACS_peak_15775	190.34	1414	uc007gum.1	Cdk17	190.34	5.46	38.98	UCSC_knowngene	3372	chr10:93208172-93267073+	exon sense-overlapping	ENSMUST00000069965	Cdk17	chr10:93160876-93241342+
chr7	126695400	126696280	MACS_peak_146056	187.31	880	ENSMUST00000144571	Bola2	187.31	6.26	35.06	Ensembl	1013	chr7:126695401-126696687+	exon sense-overlapping	ENSMUST00000106369	Bola2	chr7:126695973-126696697+
chr19	38931029	38931512	MACS_peak_71638	185.06	483	ENSMUST00000138292	Hells	185.06	6.53	39.74	Ensembl	693	chr19:38931030-38940500+	exon sense-overlapping	ENSMUST00000025965	Hells	chr19:38930915-38971051+
chr13	48261830	48262591	MACS_peak_36411	170.39	761	uc007qic.1	AK039372	170.39	4.94	41.36	UCSC_knowngene	2312	chr13:48239054-48262591-	natural antisense	ENSMUST00000021810	Id4	chr13:48261427-48264036+
chr11	120708857	120709246	MACS_peak_30525	163.88	389	ENSMUST00000172392	Aspscr1	163.88	6.4	36.13	Ensembl	491	chr11:120708858-120709445+	exon sense-overlapping	ENSMUST00000026135	Aspscr1	chr11:120672992-120709447+
chr11	76493710	76494984	MACS_peak_25476	163.29	1274	ENSMUST00000137261	Abr	163.29	8.5	36.16	Ensembl	2009	chr11:76485743-76494984-	exon sense-overlapping	ENSMUST00000072740	Abr	chr11:76416734-76571535-
chr11	97164220	97164830	MACS_peak_31863	155.65	610	ENSMUST00000153727	Kpnb1	155.65	5.51	28.07	Ensembl	779	chr11:97164221-97165400-	exon sense-overlapping	ENSMUST00000001479	Kpnb1	chr11:97159714-97187881-
chr11	52126653	52127779	MACS_peak_20296	151.84	1126	ENSMUST00000180832	mmu-mir-3061	151.84	6.97	44.48	Ensembl	2986	chr11:52124530-52127779-	natural antisense	ENSMUST00000020608	Ppp2ca	chr11:52098681-52127778+
chrX	73921271	73921855	MACS_peak_195473	145.14	584	ENSMUST00000149591	Naa10	145.14	5.19	28.63	Ensembl	649	chrX:73920977-73921855-	exon sense-overlapping	ENSMUST00000033763	Naa10	chrX:73916873-73921944-
chr6	77257311	77257791	MACS_peak_153261	143.01	480	uc009cju.1	Lrrtm1	143.01	4.88	28.85	UCSC_knowngene	2930	chr6:77242717-77257791+	exon sense-overlapping	ENSMUST00000159616	Lrrtm1	chr6:77242697-77245517+
chr7	3645267	3646219	MACS_peak_121732	142.58	952	uc009evk.3	AK031165	142.58	5.66	45.7	UCSC_knowngene	4313	chr7:3645268-3649580+	exon sense-overlapping	ENSMUST00000038913	Cnot3	chr7:3645352-3661100+
chr15	88713432	88714017	MACS_peak_67082	137.94	585	ENSMUST00000139515	Brd1	137.94	6.16	28.74	Ensembl	720	chr15:88713433-88717040-	exon sense-overlapping	ENSMUST00000088911	Brd1	chr15:88698851-88734230-
chr14	103346215	103346814	MACS_peak_50883	121.12	599	ENSMUST00000162537	Mycbp2	121.12	6.32	37.66	Ensembl	3495	chr14:103311695-103346814-	exon sense-overlapping	ENSMUST00000159855	Mycbp2	chr14:103113411-103346800-
chr10	73099341	73100216	MACS_peak_13629	116.72	875	uc007fpc.1	AK080816	116.72	5.3	49.58	UCSC_knowngene	1135	chr10:73099342-73484120+	intergenic	NA	NA	NA
chr11	20830275	20830755	MACS_peak_18553	113.15	480	ENSMUST00000144441	Lgalsl	113.15	7.04	50.21	Ensembl	913	chr11:20826350-20830755-	exon sense-overlapping	ENSMUST00000047028	Lgalsl	chr11:20823576-20831056-
chr4	155249965	155250650	MACS_peak_134144	112.17	685	NR_033802	2610002J02Rik	112.17	5.25	30.13	RefSeq	1519	chr4:155249966-155256687+	exon sense-overlapping	ENSMUST00000097747	2610002J02Rik	chr4:155250003-155256684+
chr5	31145683	31146060	MACS_peak_117468	110.6	377	ENSMUST00000149113	Mpv17	110.6	4.58	37.91	Ensembl	699	chr5:31141711-31146060-	exon sense-overlapping	ENSMUST00000067186	Mpv17	chr5:31141096-31154193-
chr1	186739286	186739863	MACS_peak_9595	107.97	577	ENSMUST00000162336	Rrp15	107.97	4.76	50.93	Ensembl	3092	chr1:186721092-186749325-	exon sense-overlapping	ENSMUST00000001339	Rrp15	chr1:186720978-186749358-
chr2	120534690	120535681	MACS_peak_90141	105.16	991	ENSMUST00000181963	Gm26899	105.16	3.72	37.38	Ensembl	3328	chr2:120532904-120539846+	intronic antisense	ENSMUST00000135625	Zfp106	chr2:120531886-120563843-
chr7	25297371	25297921	MACS_peak_122687	97.67	550	ENSMUST00000148828	Pafah1b3	97.67	3.91	53.38	Ensembl	1106	chr7:25296620-25297921-	exon sense-overlapping	ENSMUST00000005583	Pafah1b3	chr7:25295049-25297986-
chr3	66994317	66994892	MACS_peak_87502	95.79	575	ENSMUST00000182708	Rsrc1	95.79	4.05	53.02	Ensembl	3921	chr3:66990972-66994892+	exon sense-overlapping	ENSMUST00000046542	Rsrc1	chr3:66985703-67358390+
chr3	13597138	13597836	MACS_peak_111906	92.8	698	NR_040598	4930539N22Rik	92.8	5.48	30.17	RefSeq	1077	chr3:13597139-13652865-	intronic antisense	NM_001163328	Ralyl	chr3:13471655-14182287+
chr11	102397863	102398233	MACS_peak_24924	92.37	370	ENSMUST00000146330	Rundc3a	92.37	4.55	53.82	Ensembl	1878	chr11:102397864-102402555+	exon sense-overlapping	ENSMUST00000006750	Rundc3a	chr11:102393403-102402555+
chr11	102309039	102309552	MACS_peak_32464	92.29	513	ENSMUST00000174400	Ubtf	92.29	7.19	30.27	Ensembl	668	chr11:102309040-102309908-	exon sense-overlapping	ENSMUST00000006754	Ubtf	chr11:102305924-102319096-
chr19	6050521	6051310	MACS_peak_69839	90.03	789	ENSMUST00000142101	Syvn1	90.03	4.61	54.16	Ensembl	4080	chr19:6047065-6053711+	exon sense-overlapping	ENSMUST00000025723	Syvn1	chr19:6047104-6053709+
chr2	30967089	30967872	MACS_peak_98432	88.51	783	ENSMUST00000137694	Tor1a	88.51	2.72	30.08	Ensembl	1605	chr2:30960680-30967872-	exon sense-overlapping	ENSMUST00000028200	Tor1a	chr2:30960627-30967933-
chr2	181084816	181087100	MACS_peak_85067	86.34	2284	ENSMUST00000145861	Kcnq2	86.34	5.69	54.76	Ensembl	3131	chr2:181084582-181100798-	exon sense-overlapping	ENSMUST00000016491	Kcnq2	chr2:181075588-181135291-
chr4	136051027	136051720	MACS_peak_112865	85.8	693	ENSMUST00000150565	Rpl11	85.8	5.66	38.49	Ensembl	843	chr4:136051028-136052716-	exon sense-overlapping	ENSMUST00000102536	Rpl11	chr4:136049731-136053393-
chr2	25406214	25406848	MACS_peak_74562	84.72	634	ENSMUST00000144413	Npdc1	84.72	5.63	55.04	Ensembl	893	chr2:25403107-25406848+	exon sense-overlapping	ENSMUST00000055921	Npdc1	chr2:25403171-25409494+
chr1	86605057	86606552	MACS_peak_4274	84.36	1495	ENSMUST00000122884	Cops7b	84.36	6.41	55.2	Ensembl	2578	chr1:86587142-86606978+	exon sense-overlapping	ENSMUST00000027446	Cops7b	chr1:86587100-86606500+
chr5	112339896	112340219	MACS_peak_142759	82.47	323	ENSMUST00000147940	Srrd	82.47	4.1	30.06	Ensembl	422	chr5:112339719-112340219-	exon sense-overlapping	ENSMUST00000031289	Srrd	chr5:112337392-112343040-
chr11	119155820	119156994	MACS_peak_26849	79.58	1174	ENSMUST00000181119	Gm26888	79.58	4.94	55.84	Ensembl	3683	chr11:119151651-119156994+	natural antisense	ENSMUST00000036113	Tbc1d16	chr11:119143045-119228499-
chr7	126857225	126857787	MACS_peak_169838	77.69	562	ENSMUST00000125624	Ino80e	77.69	3.5	30.56	Ensembl	1741	chr7:126852433-126862377-	exon sense-overlapping	ENSMUST00000050833	Ino80e	chr7:126851580-126861463-
chr11	78470686	78472059	MACS_peak_22737	76.19	1373	ENSMUST00000180786	Slc46a1	76.19	4.14	56.09	Ensembl	1834	chr11:78470226-78472059+	exon sense-overlapping	ENSMUST00000001126	Slc46a1	chr11:78465697-78471945+
chr1	135152133	135152551	MACS_peak_7608	74.26	418	ENSMUST00000123344	Arl8a	74.26	2.61	37.89	Ensembl	664	chr1:135152082-135154295+	exon sense-overlapping	ENSMUST00000027684	Arl8a	chr1:135146824-135156269+
chr3	88200192	88201453	MACS_peak_88434	73.35	1261	ENSMUST00000181021	AI849053	73.35	3.74	56.95	Ensembl	2658	chr3:88199102-88204595-	intergenic	NA	NA	NA
chr17	35909417	35910093	MACS_peak_61392	73.11	676	uc008ciz.1	AK034502	73.11	3.64	57.04	UCSC_knowngene	2945	chr17:35896946-35912215+	intronic antisense	ENSMUST00000148721	2310061I04Rik	chr17:35892677-35897431-
chr4	132211431	132212105	MACS_peak_112410	70.99	674	ENSMUST00000102570	Ythdf2	70.99	5.57	38.45	Ensembl	2536	chr4:132186750-132212105-	exon sense-overlapping	ENSMUST00000085181	Ythdf2	chr4:132186290-132212091-
chr14	55560120	55561772	MACS_peak_43195	70.12	1652	ENSMUST00000129310	Dcaf11	70.12	7.24	56.6	Ensembl	7271	chr14:55560121-55569535+	exon sense-overlapping	ENSMUST00000072530	Dcaf11	chr14:55560929-55570062+
chr10	105842541	105843049	MACS_peak_16195	65.79	508	ENSMUST00000133538	Ccdc59	65.79	2.66	58.09	Ensembl	4314	chr10:105841067-105847833+	exon sense-overlapping	ENSMUST00000020049	Ccdc59	chr10:105841067-105847833+
chr18	37940952	37941766	MACS_peak_66309	65.23	814	ENSMUST00000143660	Hdac3	65.23	3.44	57.26	Ensembl	3585	chr18:37935844-37945564-	exon sense-overlapping	ENSMUST00000043498	Hdac3	chr18:37936972-37954988-
chr10	7680528	7681158	MACS_peak_10341	62.66	630	NR_033219	BC020402	62.66	5.75	58.2	RefSeq	2188	chr10:7678971-7681158-	exon sense-overlapping	ENSMUST00000159977	Pcmt1	chr10:7647619-7681130-
chr4	49651233	49651548	MACS_peak_124595	61.99	315	ENSMUST00000138490	Rnf20	61.99	3.81	30.23	Ensembl	610	chr4:49650968-49652550+	exon sense-overlapping	ENSMUST00000029989	Rnf20	chr4:49632066-49656887+
chr4	41199715	41200077	MACS_peak_93665	59.02	362	ENSMUST00000143552	Ubap2	59.02	3.63	58.37	Ensembl	502	chr4:41199218-41200077-	exon sense-overlapping	ENSMUST00000030143	Ubap2	chr4:41194316-41275135-
chr2	130176851	130177166	MACS_peak_90946	57.25	315	ENSMUST00000150835	Snrpb	57.25	4.93	39.42	Ensembl	416	chr2:130176852-130179334-	exon sense-overlapping	ENSMUST00000103199	Snrpb	chr2:130171635-130179403-
chr19	37295154	37295796	MACS_peak_71496	57.21	642	ENSMUST00000121321	Rpl10-ps6	57.21	6.12	59.38	Ensembl	642	chr19:37295155-37295796-	intron sense-overlapping	ENSMUST00000131070	Ide	chr19:37268743-37330613-
chr15	98567638	98568892	MACS_peak_51951	56.14	1254	NR_028442	9330020H09Rik	56.14	5.41	59.58	RefSeq	3428	chr15:98567324-98570864+	natural antisense	ENSMUST00000012104	Ccnt1	chr15:98543211-98567636-
chr11	30267463	30267910	MACS_peak_21589	53.04	447	ENSMUST00000146985	Gm8098	53.04	7.19	39.22	Ensembl	1499	chr11:30267464-30280491+	intronic antisense	ENSMUST00000006629	Sptbn1	chr11:30099395-30268169-
chr2	113828401	113828762	MACS_peak_104509	50.49	361	ENSMUST00000139975	Scg5	50.49	4.34	30.26	Ensembl	593	chr2:113827340-113828762-	exon sense-overlapping	ENSMUST00000024005	Scg5	chr2:113776362-113829121-
chr11	100905079	100905674	MACS_peak_24738	50.15	595	ENSMUST00000152623	Stat3	50.15	3.19	60.54	Ensembl	609	chr11:100905080-100905846-	exon sense-overlapping	ENSMUST00000092671	Stat3	chr11:100888236-100939380-

## Sheet: OGDR1.5h-m1A_lncRNA
Chromosome	Transcript start	Transcript end	Peak ID	Score	Peak length	Transcript ID	Gene mame	P value (-log10)	Fold Enrichment	FDR	Source	RNA length	Coordinates	Relationship	Associated gene ID	Associated gene name	Associated gene coordinates
chr4	126167469	126168194	MACS_peak_133024	3210.91	725	ENSMUST00000140390	Thrap3	3210.91	12.39	33.33	Ensembl	2656	chr4:126164086-126168449-	exon sense-overlapping	ENSMUST00000080919	Thrap3	chr4:126164082-126202760-
chr17	34601313	34601988	MACS_peak_81644	3181.94	675	ENSMUST00000174475	Rnf5	3181.94	41.86	20	Ensembl	850	chr17:34601314-34603376-	exon sense-overlapping	ENSMUST00000015622	Rnf5	chr17:34601091-34603690-
chr7	78899370	78899699	MACS_peak_155462	3170.02	329	ENSMUST00000172017	Aen	3170.02	39.05	0	Ensembl	393	chr7:78895951-78899699+	exon sense-overlapping	ENSMUST00000107421	Aen	chr7:78895934-78908374+
chr18	75521180	75522031	MACS_peak_93455	3146.08	851	NR_045879	Gm10532	3146.08	23.66	5.26	RefSeq	2301	chr18:75514645-75522806+	natural antisense	ENSMUST00000165559	Ctif	chr18:75431224-75697696-
chr7	45006305	45009283	MACS_peak_152960	3132.52	2978	ENSMUST00000148227	Scaf1	3132.52	11.23	7.14	Ensembl	6459	chr7:45002948-45013973-	exon sense-overlapping	ENSMUST00000085383	Scaf1	chr7:45002948-45016363-
chr9	81677772	81678386	MACS_peak_197991	3116.98	614	ENSMUST00000183511	Gm9531	3116.98	23.84	3.7	Ensembl	775	chr9:81677612-81678386+	intergenic	NA	NA	NA
chr1	24613970	24614812	MACS_peak_1282	3100	842	uc007ams.1	Atpase6	3100	5.75	5.87	UCSC_knowngene	842	chr1:24613971-24614812-	intergenic	NA	NA	NA
chr1	172199916	172200581	MACS_peak_11797	3100	665	ENSMUST00000152432	Pea15a	3100	19.86	5.87	Ensembl	1015	chr1:172199775-172206804-	exon sense-overlapping	ENSMUST00000013842	Pea15a	chr1:172196728-172206804-
chr10	80300846	80301450	MACS_peak_19843	3100	604	ENSMUST00000140658	Apc2	3100	35.76	5.87	Ensembl	2351	chr10:80300847-80303355+	exon sense-overlapping	ENSMUST00000020349	Apc2	chr10:80301820-80318256+
chr11	5071519	5071840	MACS_peak_24535	3100	321	ENSMUST00000130060	Ewsr1	3100	33.54	5.87	Ensembl	898	chr11:5070690-5072220-	exon sense-overlapping	ENSMUST00000073308	Ewsr1	chr11:5069698-5099067-
chr11	75751603	75752080	MACS_peak_30476	3100	477	ENSMUST00000155057	Ywhae	3100	7.42	5.87	Ensembl	815	chr11:75751604-75759315+	exon sense-overlapping	ENSMUST00000067664	Ywhae	chr11:75732869-75765845+
chr11	77842147	77843868	MACS_peak_30835	3100	1721	ENSMUST00000100443	Myo18a	3100	14.72	5.87	Ensembl	3807	chr11:77840933-77844878+	exon sense-overlapping	ENSMUST00000000645	Myo18a	chr11:77777265-77865980+
chr11	95858816	95859174	MACS_peak_32967	3100	358	ENSMUST00000153795	Gm11527	3100	42.23	5.87	Ensembl	596	chr11:95858162-95859174-	intergenic	NA	NA	NA
chr11	99213119	99213443	MACS_peak_33492	3100	324	ENSMUST00000156160	Smarce1	3100	18.45	5.87	Ensembl	610	chr11:99209992-99213443-	exon sense-overlapping	ENSMUST00000103133	Smarce1	chr11:99209047-99231017-
chr11	102877279	102877718	MACS_peak_33984	3100	439	ENSMUST00000148209	Eftud2	3100	27.36	5.87	Ensembl	796	chr11:102876964-102880935-	exon sense-overlapping	ENSMUST00000021306	Eftud2	chr11:102838473-102880967-
chr12	80946375	80946927	MACS_peak_42410	3100	552	ENSMUST00000151036	Srsf5	3100	20.87	5.87	Ensembl	3482	chr12:80946376-80950497+	exon sense-overlapping	ENSMUST00000094693	Srsf5	chr12:80945504-80950507+
chr12	83663571	83664259	MACS_peak_42915	3100	688	uc007odn.1	Rbm25	3100	14.13	5.87	UCSC_knowngene	2949	chr12:83661618-83668508+	exon sense-overlapping	ENSMUST00000048155	Rbm25	chr12:83632252-83683123+
chr12	109558639	109571726	MACS_peak_45475	3100	13087	ENSMUST00000146701	Meg3	3100	21.61	5.87	Ensembl	14548	chr12:109545398-109571726+	intergenic	NA	NA	NA
chr13	47105380	47105737	MACS_peak_49410	3100	357	ENSMUST00000150652	Dek	3100	20.53	5.87	Ensembl	468	chr13:47105381-47106183-	exon sense-overlapping	ENSMUST00000021807	Dek	chr13:47084782-47106190-
chr13	55476145	55476773	MACS_peak_50173	3100	628	ENSMUST00000135705	Dbn1	3100	19.74	5.87	Ensembl	2119	chr13:55475125-55488066-	exon sense-overlapping	ENSMUST00000021950	Dbn1	chr13:55473429-55488111-
chr14	8799588	8800294	MACS_peak_54557	3100	706	ENSMUST00000052615	Gm9800	3100	38.54	5.87	Ensembl	914	chr14:8799589-8800504-	intergenic	NA	NA	NA
chr14	122117937	122119009	MACS_peak_62631	3100	1072	ENSMUST00000168178	Gm6254	3100	134.48	5.87	Ensembl	1072	chr14:122117938-122119009+	intron sense-overlapping	ENSMUST00000026624	Tm9sf2	chr14:122107038-122159604+
chr15	86194748	86195280	MACS_peak_69158	3100	532	uc029sug.1	AK155692	3100	31.92	5.87	UCSC_knowngene	532	chr15:86194749-86195280+	intergenic	NA	NA	NA
chr15	93234362	93234700	MACS_peak_69807	3100	338	ENSMUST00000083977	Gm24447	3100	5.98	5.87	Ensembl	338	chr15:93234363-93234700+	intergenic	NA	NA	NA
chr16	20651715	20652300	MACS_peak_73482	3100	585	ENSMUST00000169195	Psmd2	3100	45.2	5.87	Ensembl	747	chr16:20651716-20652754+	exon sense-overlapping	ENSMUST00000007212	Psmd2	chr16:20651652-20663414+
chr17	56584824	56585350	MACS_peak_84505	3100	526	ENSMUST00000182031	Safb	3100	33.64	5.87	Ensembl	1755	chr17:56584825-56596523+	exon sense-overlapping	ENSMUST00000095224	Safb	chr17:56585059-56606294+
chr17	87435603	87435934	MACS_peak_87083	3100	331	ENSMUST00000143965	Calm2	3100	16.32	5.87	Ensembl	890	chr17:87433720-87446848-	exon sense-overlapping	ENSMUST00000040440	Calm2	chr17:87433412-87446935-
chr19	46033744	46034512	MACS_peak_98559	3100	768	ENSMUST00000126320	Ldb1	3100	20	5.87	Ensembl	907	chr19:46033745-46034878-	exon sense-overlapping	ENSMUST00000026252	Ldb1	chr19:46032689-46044914-
chr2	7076093	7076414	MACS_peak_100718	3100	321	ENSMUST00000083890	Gm26315	3100	23.27	5.87	Ensembl	321	chr2:7076094-7076414-	intron sense-overlapping	ENSMUST00000002176	Celf2	chr2:6539694-7396000-
chr2	39004847	39005539	MACS_peak_104225	3100	692	ENSMUST00000039535	Wdr38	3100	10.31	5.87	Ensembl	2699	chr2:38997476-39006168+	exon sense-overlapping	ENSMUST00000112872	Wdr38	chr2:38998319-39001582+
chr2	121449974	121453005	MACS_peak_109830	3100	3031	ENSMUST00000134412	Serf2	3100	22.66	5.87	Ensembl	3105	chr2:121449368-121453005+	exon sense-overlapping	ENSMUST00000099475	Serf2	chr2:121449383-121451054+
chr2	121456812	121457701	MACS_peak_109831	3100	889	ENSMUST00000125849	Hypk	3100	45.25	5.87	Ensembl	1349	chr2:121456693-121458436+	exon sense-overlapping	ENSMUST00000110612	Hypk	chr2:121453290-121458510+
chr2	122028807	122029328	MACS_peak_109937	3100	521	ENSMUST00000142747	Eif3j1	3100	30.05	5.87	Ensembl	594	chr2:122028652-122029328+	exon sense-overlapping	ENSMUST00000028668	Eif3j1	chr2:122028546-122056598+
chr2	130663347	130663819	MACS_peak_110751	3100	472	ENSMUST00000124559	Ddrgk1	3100	31.39	5.87	Ensembl	893	chr2:130655199-130663819-	exon sense-overlapping	ENSMUST00000089559	Ddrgk1	chr2:130653960-130664659-
chr2	154887528	154888360	MACS_peak_112901	3100	832	ENSMUST00000135524	Eif2s2	3100	29.92	5.87	Ensembl	4102	chr2:154884378-154892808-	exon sense-overlapping	ENSMUST00000099173	Eif2s2	chr2:154871410-154892935-
chr2	173585529	173587115	MACS_peak_115279	3100	1586	ENSMUST00000153162	Ppp4r1l-ps	3100	21.79	5.87	Ensembl	4552	chr2:173584905-173659539-	bidirectional	ENSMUST00000029024	Rab22a	chr2:173659760-173707343+
chr3	124385509	124385998	MACS_peak_124270	3100	489	ENSMUST00000178993	Gm4617	3100	26.95	5.87	Ensembl	489	chr3:124385510-124385998+	intergenic	NA	NA	NA
chr4	12232779	12233966	MACS_peak_127209	3100	1187	ENSMUST00000169135	Gm11847	3100	12.45	5.87	Ensembl	2593	chr4:12232780-12238024+	intergenic	NA	NA	NA
chr4	111807357	111808423	MACS_peak_134127	3100	1066	ENSMUST00000120017	Gm12960	3100	68.68	5.87	Ensembl	1066	chr4:111807358-111808423-	intronic antisense	ENSMUST00000038868	Spata6	chr4:111719984-111829142+
chr4	119278933	119279398	MACS_peak_134742	3100	465	ENSMUST00000145976	Ybx1	3100	14.48	5.87	Ensembl	718	chr4:119278167-119279450-	exon sense-overlapping	ENSMUST00000079644	Ybx1	chr4:119277981-119294604-
chr4	127027396	127028015	MACS_peak_135735	3100	619	ENSMUST00000143168	Sfpq	3100	18.82	5.87	Ensembl	967	chr4:127025956-127028015+	exon sense-overlapping	ENSMUST00000030623	Sfpq	chr4:127021324-127031236+
chr4	129334496	129335249	MACS_peak_136237	3100	753	ENSMUST00000147183	Rbbp4	3100	24.24	5.87	Ensembl	4663	chr4:129324824-129335249-	exon sense-overlapping	ENSMUST00000102598	Rbbp4	chr4:129307100-129335370-
chr4	131899688	131901662	MACS_peak_136579	3100	1974	NR_102393	Gm12992	3100	14.01	5.87	RefSeq	4493	chr4:131899478-131920029-	natural antisense	ENSMUST00000030743	Srsf4	chr4:131885208-131901706+
chr4	133966428	133967908	MACS_peak_137000	3100	1480	ENSMUST00000145025	Hmgn2	3100	63.26	5.87	Ensembl	2159	chr4:133964991-133967908-	exon sense-overlapping	ENSMUST00000100472	Hmgn2	chr4:133965020-133967893-
chr5	74594866	74595211	MACS_peak_146097	3100	345	ENSMUST00000125129	Fip1l1	3100	20.39	5.87	Ensembl	547	chr5:74594743-74595916+	exon sense-overlapping	ENSMUST00000080164	Fip1l1	chr5:74535449-74598790+
chr5	145135064	145135371	MACS_peak_154125	3100	307	ENSMUST00000143439	Pdap1	3100	21.87	5.87	Ensembl	676	chr5:145131371-145135472-	exon sense-overlapping	ENSMUST00000031627	Pdap1	chr5:145128769-145140238-
chr6	30804783	30807552	MACS_peak_156409	3100	2769	uc009bfw.1	Mit1/Lb9	3100	14.79	5.87	UCSC_knowngene	2769	chr6:30804784-30807552+	intronic antisense	ENSMUST00000048774	Copg2	chr6:30747554-30896739-
chr7	45459083	45459463	MACS_peak_169315	3100	380	ENSMUST00000155582	Ftl1	3100	11.16	5.87	Ensembl	825	chr7:45457965-45459463-	exon sense-overlapping	ENSMUST00000094434	Ftl1	chr7:45457944-45459884-
chr7	126797643	126798307	MACS_peak_176852	3100	664	ENSMUST00000139657	Aldoa	3100	18.82	5.87	Ensembl	1352	chr7:126795949-126798307-	exon sense-overlapping	ENSMUST00000032934	Aldoa	chr7:126795234-126799254-
chr7	127978736	127979654	MACS_peak_177081	3100	918	uc009jxs.1	AK134717	3100	57.34	5.87	UCSC_knowngene	1514	chr7:127978141-127979654+	exon sense-overlapping	ENSMUST00000077609	Fus	chr7:127967490-127982032+
chr8	114205611	114205947	MACS_peak_187862	3100	336	ENSMUST00000142591	Vat1l	3100	40.36	5.87	Ensembl	456	chr8:114205612-114230325+	exon sense-overlapping	ENSMUST00000049509	Vat1l	chr8:114205630-114374071+
chr9	22320645	22321410	MACS_peak_191461	3100	765	ENSMUST00000178676	Gm10182	3100	31.87	5.87	Ensembl	1097	chr9:22320314-22321410-	intergenic	NA	NA	NA
chr9	59485978	59486618	MACS_peak_195600	3100	640	ENSMUST00000026264	Arih1	3100	36.12	5.87	Ensembl	2005	chr9:59393113-59486618-	exon sense-overlapping	ENSMUST00000165322	Arih1	chr9:59393294-59486347-
chrX	74314863	74315572	MACS_peak_204192	3100	709	ENSMUST00000138242	Fam50a	3100	21.19	5.87	Ensembl	1918	chrX:74313126-74320134+	exon sense-overlapping	ENSMUST00000114160	Fam50a	chrX:74313033-74320149+
chrX	80456736	80457995	MACS_peak_204386	3100	1259	ENSMUST00000088183	Gm5940	3100	455.21	5.87	Ensembl	1815	chrX:80456737-80458551+	intergenic	NA	NA	NA
chrX	88759470	88760312	MACS_peak_204712	3100	842	ENSMUST00000182943	Gm27000	3100	81.8	5.87	Ensembl	842	chrX:88759471-88760312-	intergenic	NA	NA	NA
chrX	101444687	101445334	MACS_peak_205189	3100	647	ENSMUST00000136251	Nono	3100	10.24	5.87	Ensembl	1337	chrX:101443306-101447902+	exon sense-overlapping	ENSMUST00000033673	Nono	chrX:101429555-101448591+
chrX	151909408	151910192	MACS_peak_206764	3100	784	ENSMUST00000132453	Huwe1	3100	23.57	5.87	Ensembl	896	chrX:151908845-151910192+	exon sense-overlapping	ENSMUST00000026292	Huwe1	chrX:151803327-151935417+
chr15	74093549	74094402	MACS_peak_66199	3100	853	ENSMUST00000180186	Gm15387	3100	10	5.8	Ensembl	1220	chr15:74093183-74094402-	intergenic	NA	NA	NA
chr19	5422120	5422847	MACS_peak_93403	3100	727	NR_015545	4930481A15Rik	3100	17.26	5.8	RefSeq	2184	chr19:5406815-5422847+	exon sense-overlapping	ENSMUST00000153017	4930481A15Rik	chr19:5406822-5417587+
chr19	24289715	24290783	MACS_peak_94919	3100	1068	ENSMUST00000118970	Gm16216	3100	71.64	5.8	Ensembl	1111	chr19:24289716-24290826+	intergenic	NA	NA	NA
chr2	22588102	22589647	MACS_peak_99984	3100	1545	ENSMUST00000117219	Gm13340	3100	105.44	5.8	Ensembl	1545	chr2:22588103-22589647-	intronic antisense	ENSMUST00000044749	Myo3a	chr2:22227503-22618252+
chr3	104842321	104842684	MACS_peak_120764	3100	363	ENSMUST00000155476	Capza1	3100	74.96	5.8	Ensembl	489	chr3:104842322-104864373-	exon sense-overlapping	ENSMUST00000094028	Capza1	chr3:104822779-104864505-
chr5	108434025	108434397	MACS_peak_145525	3100	372	ENSMUST00000123184	Atp5k	3100	12.02	5.8	Ensembl	563	chr5:108433246-108434397-	exon sense-overlapping	ENSMUST00000049628	Atp5k	chr5:108433244-108434448-
chr6	89322457	89324841	MACS_peak_158036	3100	2384	ENSMUST00000181258	Gm26811	3100	19.71	5.8	Ensembl	5485	chr6:89304630-89327621+	natural antisense	ENSMUST00000049845	Plxna1	chr6:89319015-89357717-
chr9	123689232	123690192	MACS_peak_197466	3100	960	ENSMUST00000168019	Gm10052	3100	11.07	5.8	Ensembl	960	chr9:123689233-123690192-	intronic antisense	ENSMUST00000163559	Ccr9	chr9:123678439-123781965+
chr1	9574547	9575649	MACS_peak_319	3100	1102	ENSMUST00000121942	Gm6161	3100	89.33	11.11	Ensembl	1102	chr1:9574548-9575649+	intron sense-overlapping	ENSMUST00000144177	Adhfe1	chr1:9547948-9577970+
chr7	51746696	51747698	MACS_peak_153645	3100	1002	ENSMUST00000107041	Gm7336	3100	20.31	11.11	Ensembl	1002	chr7:51746697-51747698+	intergenic	NA	NA	NA
chr7	127981190	127981829	MACS_peak_160166	3100	639	ENSMUST00000172755	Fus	3100	39.97	11.11	Ensembl	670	chr7:127980216-127981829+	exon sense-overlapping	ENSMUST00000077609	Fus	chr7:127967490-127982032+
chr8	121590476	121591097	MACS_peak_184869	3058.01	621	ENSMUST00000181826	Map1lc3b	3058.01	25.55	5.87	Ensembl	2633	chr8:121590477-121593109+	exon sense-overlapping	ENSMUST00000034270	Map1lc3b	chr8:121590361-121598760+
chr1	95498583	95499187	MACS_peak_6757	3043.99	604	ENSMUST00000109141	Gm15427	3043.99	10.98	5.77	Ensembl	604	chr1:95498584-95499187+	intergenic	NA	NA	NA
chr16	18245004	18245358	MACS_peak_73226	3030.51	354	ENSMUST00000123073	Ranbp1	3030.51	10.61	5.73	Ensembl	626	chr16:18244969-18248646-	exon sense-overlapping	ENSMUST00000052325	Ranbp1	chr16:18239802-18248067-
chr3	157541699	157542063	MACS_peak_124159	3012.93	364	ENSMUST00000152882	Zranb2	3012.93	18	5.75	Ensembl	2490	chr3:157534425-157546923+	exon sense-overlapping	ENSMUST00000029831	Zranb2	chr3:157534359-157548336+
chr11	41141902	41142396	MACS_peak_26755	2938.23	494	ENSMUST00000119350	Hmgb1-ps1	2938.23	11.94	5.66	Ensembl	634	chr11:41141763-41142396+	intergenic	NA	NA	NA
chr8	84844573	84844916	MACS_peak_167646	2915.64	343	ENSMUST00000154774	Calr	2915.64	6.47	10.99	Ensembl	943	chr8:84842596-84844916-	exon sense-overlapping	ENSMUST00000003912	Calr	chr8:84841850-84846934-
chr12	101082450	101084419	MACS_peak_44640	2884.78	1969	NR_038050	D130020L05Rik	2884.78	13.26	5.44	RefSeq	2935	chr12:101082451-101088927+	natural antisense	ENSMUST00000048305	Smek1	chr12:101039409-101083702-
chrX	105851036	105851458	MACS_peak_205576	2857.01	422	ENSMUST00000146193	Atrx	2857.01	12.33	5.39	Ensembl	689	chrX:105846737-105851524-	exon sense-overlapping	ENSMUST00000113573	Atrx	chrX:105797615-105929397-
chr8	83570642	83570998	MACS_peak_185143	2768.05	356	ENSMUST00000127162	Ndufb7	2768.05	20.12	5.18	Ensembl	4435	chr8:83566758-83571626+	exon sense-overlapping	ENSMUST00000036996	Ndufb7	chr8:83566671-83571626+
chr11	45829318	45829869	MACS_peak_26912	2719.59	551	ENSMUST00000121695	Gm12164	2719.59	18.97	5.46	Ensembl	551	chr11:45829319-45829869+	intergenic	NA	NA	NA
chr14	54643940	54644536	MACS_peak_58393	2687.31	596	ENSMUST00000152773	Acin1	2687.31	16.45	5.41	Ensembl	844	chr14:54642902-54644536-	exon sense-overlapping	ENSMUST00000022793	Acin1	chr14:54642161-54686931-
chr5	132541514	132543344	MACS_peak_152305	2683	1830	ENSMUST00000161226	Auts2	2683	24.31	5.39	Ensembl	7409	chr5:131437333-132543344-	exon sense-overlapping	ENSMUST00000160135	Auts2	chr5:132030990-132449360-
chr11	26786584	26787585	MACS_peak_23712	2650.62	1001	NR_002890	Gm12070	2650.62	15.98	10.85	RefSeq	1742	chr11:26785108-26787859+	intergenic	NA	NA	NA
chr14	25649083	25649574	MACS_peak_56085	2576.13	491	ENSMUST00000159766	Zmiz1	2576.13	24.38	5.32	Ensembl	4314	chr14:25459292-25649574+	exon sense-overlapping	ENSMUST00000007961	Zmiz1	chr14:25459267-25664719+
chr3	84190512	84191399	MACS_peak_109179	2520.84	887	ENSMUST00000128574	Trim2	2520.84	10.25	10.84	Ensembl	4734	chr3:84163707-84220845-	exon sense-overlapping	ENSMUST00000054990	Trim2	chr3:84163722-84270791-
chr2	28933474	28934649	MACS_peak_100788	2510.6	1175	ENSMUST00000163460	Gm13394	2510.6	38.14	5.38	Ensembl	1178	chr2:28933475-28934652-	intergenic	NA	NA	NA
chr14	46084125	46084815	MACS_peak_57862	2488.64	690	ENSMUST00000111388	Gm1821	2488.64	7.52	5.28	Ensembl	690	chr14:46084126-46084815+	intergenic	NA	NA	NA
chr11	75637582	75638256	MACS_peak_30213	2466.85	674	ENSMUST00000136605	Inpp5k	2466.85	16.52	5.31	Ensembl	3381	chr11:75631029-75648863+	exon sense-overlapping	ENSMUST00000006286	Inpp5k	chr11:75630988-75648871+
chr4	70534227	70534995	MACS_peak_130942	2461.84	768	ENSMUST00000037881	Megf9	2461.84	12.05	5.21	Ensembl	1205	chr4:70461826-70534995-	exon sense-overlapping	ENSMUST00000107359	Megf9	chr4:70427065-70534928-
chr13	83524855	83525279	MACS_peak_46985	2381.31	424	uc007rig.1	AK043267	2381.31	13.01	10.49	UCSC_knowngene	2484	chr13:83524856-83527339+	intron sense-overlapping	ENSMUST00000005722	Mef2c	chr13:83504034-83667079+
chr1	55089050	55089381	MACS_peak_3298	2349.56	331	ENSMUST00000134628	Hspe1	2349.56	12.76	5.73	Ensembl	964	chr1:55088314-55089915+	exon sense-overlapping	ENSMUST00000075242	Hspe1	chr1:55088132-55091307+
chr4	69925200	69926171	MACS_peak_130866	2259.09	971	ENSMUST00000056452	Gm11223	2259.09	7.76	4.79	Ensembl	971	chr4:69925201-69926171-	intergenic	NA	NA	NA
chr7	45380716	45383184	MACS_peak_169297	2256.26	2468	NR_126539	Snrnp70	2256.26	25.24	4.78	RefSeq	4117	chr7:45376454-45395742-	exon sense-overlapping	ENSMUST00000074575	Snrnp70	chr7:45376462-45395692-
chr6	83188610	83189268	MACS_peak_160179	2226.52	658	ENSMUST00000123313	Dctn1	2226.52	10.09	4.74	Ensembl	718	chr6:83188611-83189607+	exon sense-overlapping	ENSMUST00000077407	Dctn1	chr6:83165920-83200116+
chr9	83146423	83146788	MACS_peak_198048	2208.88	365	uc009qwf.1	AK018214	2208.88	19.87	4.78	UCSC_knowngene	1129	chr9:83146002-83147281+	natural antisense	ENSMUST00000161796	Hmgn3	chr9:83109948-83146607-
chr9	103363782	103364267	MACS_peak_199449	2190.77	485	uc009rgs.1	AK048941	2190.77	17.56	4.73	UCSC_knowngene	2664	chr9:103361604-103364267-	exon sense-overlapping	ENSMUST00000035484	Cdv3	chr9:103353103-103365780-
chr8	72138069	72138737	MACS_peak_180418	2182.62	668	ENSMUST00000181918	Gm26586	2182.62	11.63	5.72	Ensembl	1745	chr8:72137389-72140820-	natural antisense	ENSMUST00000003575	Tpm4	chr8:72135259-72153142+
chr2	32364218	32364857	MACS_peak_103211	2146.69	639	ENSMUST00000147338	Ciz1	2146.69	28.36	4.77	Ensembl	993	chr2:32363756-32364987+	exon sense-overlapping	ENSMUST00000048964	Ciz1	chr2:32363198-32378297+
chr1	150440066	150440529	MACS_peak_9577	2100.05	463	ENSMUST00000132257	Tpr	2100.05	17.86	5.61	Ensembl	934	chr1:150437435-150443222+	exon sense-overlapping	ENSMUST00000119161	Tpr	chr1:150393250-150449935+
chr14	57798487	57798849	MACS_peak_58729	2098.41	362	ENSMUST00000131455	Sap18	2098.41	13.22	4.77	Ensembl	453	chr14:57798264-57798849+	exon sense-overlapping	ENSMUST00000111267	Sap18	chr14:57798638-57802335+
chr14	118982657	118983420	MACS_peak_61129	2097.78	763	uc007uzf.1	AK014089	2097.78	22.88	5.59	UCSC_knowngene	1910	chr14:118982658-118984661-	intergenic	NA	NA	NA
chr7	28815279	28816960	MACS_peak_164756	2096.97	1681	ENSMUST00000173750	Hnrnpl	2096.97	16.63	5.58	Ensembl	2275	chr7:28808806-28816960+	exon sense-overlapping	ENSMUST00000038572	Hnrnpl	chr7:28810890-28822266+
chr19	29160117	29160765	MACS_peak_95346	2078.35	648	ENSMUST00000084171	Gm5518	2078.35	7.1	5.54	Ensembl	648	chr19:29160118-29160765+	intergenic	NA	NA	NA
chr9	75071014	75071659	MACS_peak_193064	2046.87	645	ENSMUST00000149823	Myo5a	2046.87	24.58	5.57	Ensembl	1768	chr9:75071015-75117308+	exon sense-overlapping	ENSMUST00000123128	Myo5a	chr9:75071188-75223688+
chr14	48079437	48079806	MACS_peak_57051	2042.26	369	ENSMUST00000075768	Gm6055	2042.26	19.4	5.54	Ensembl	671	chr14:48079136-48079806-	intergenic	NA	NA	NA
chr19	5388335	5388789	MACS_peak_94970	2041.06	454	NR_033224	D330050I16Rik	2041.06	18.03	4.86	RefSeq	1734	chr19:5388336-5390069+	natural antisense	ENSMUST00000044207	Sart1	chr19:5377523-5388703-
chr11	58042435	58043013	MACS_peak_28152	2028.61	578	ENSMUST00000140500	Larp1	2028.61	28.01	5.49	Ensembl	747	chr11:58041613-58043013+	exon sense-overlapping	ENSMUST00000071487	Larp1	chr11:58009064-58062031+
chr13	13232157	13232895	MACS_peak_42620	1987.39	738	ENSMUST00000074863	Gm2423	1987.39	32.47	10.13	Ensembl	738	chr13:13232158-13232895-	intergenic	NA	NA	NA
chr7	122969552	122970459	MACS_peak_176486	1960.69	907	NR_045614	4930413G21Rik	1960.69	24.02	4.77	RefSeq	1402	chr7:122969058-122970459-	natural antisense	ENSMUST00000148880	Rbbp6	chr7:122965686-122976008+
chr15	78436900	78437734	MACS_peak_67734	1948.23	834	ENSMUST00000160916	Kctd17	1948.23	8.28	4.73	Ensembl	1146	chr15:78432987-78437734+	exon sense-overlapping	ENSMUST00000089414	Kctd17	chr15:78428628-78438909+
chr6	125119963	125120385	MACS_peak_161123	1891.89	422	ENSMUST00000132794	Chd4	1891.89	14.38	5.73	Ensembl	821	chr6:125119767-125120865+	exon sense-overlapping	ENSMUST00000056889	Chd4	chr6:125095981-125130591+
chr15	77765451	77765828	MACS_peak_66651	1831.58	377	ENSMUST00000139729	Myh9	1831.58	9.72	5.59	Ensembl	723	chr15:77765328-77767190-	exon sense-overlapping	ENSMUST00000016771	Myh9	chr15:77760587-77842175-
chr10	93879539	93880138	MACS_peak_21556	1821.9	599	ENSMUST00000181104	Metap2	1821.9	19.81	4.71	Ensembl	931	chr10:93879540-93889761-	exon sense-overlapping	ENSMUST00000047910	Metap2	chr10:93858489-93889814-
chr5	100415716	100416166	MACS_peak_147614	1816.82	450	ENSMUST00000182144	Sec31a	1816.82	28.08	4.79	Ensembl	756	chr5:100415411-100416166-	exon sense-overlapping	ENSMUST00000094578	Sec31a	chr5:100361649-100416234-
chr14	55071861	55074010	MACS_peak_58467	1812.75	2149	uc007txy.2	Thtpa	1812.75	17.77	4.78	UCSC_knowngene	4251	chr14:55055493-55098995+	exon sense-overlapping	ENSMUST00000050575	Thtpa	chr14:55094835-55098986+
chr1	66380488	66381291	MACS_peak_4024	1797.8	803	ENSMUST00000137807	Map2	1797.8	7.21	9.27	Ensembl	1091	chr1:66321998-66381291+	exon sense-overlapping	ENSMUST00000024639	Map2	chr1:66251662-66442581+
chr13	74864891	74865356	MACS_peak_50561	1769.87	465	ENSMUST00000129154	Hnrnpa1l2-ps	1769.87	47.54	5.65	Ensembl	966	chr13:74864305-74865356+	intergenic	NA	NA	NA
chr5	99966021	99966387	MACS_peak_133156	1760.93	366	ENSMUST00000170654	Hnrnpd	1760.93	18.78	9.03	Ensembl	425	chr5:99964743-99966387-	exon sense-overlapping	ENSMUST00000019128	Hnrnpd	chr5:99960598-99978937-
chr5	9260944	9261388	MACS_peak_127065	1716.51	444	ENSMUST00000118351	Gm7332	1716.51	42.3	9.07	Ensembl	444	chr5:9260945-9261388-	intergenic	NA	NA	NA
chr17	34905341	34906040	MACS_peak_82936	1705.88	699	ENSMUST00000150786	Ehmt2	1705.88	13.88	4.64	Ensembl	726	chr17:34905240-34906040+	exon sense-overlapping	ENSMUST00000013931	Ehmt2	chr17:34898971-34914051+
chr3	87971077	87971988	MACS_peak_119122	1694.1	911	ENSMUST00000159830	Nes	1694.1	6.61	5.49	Ensembl	1311	chr3:87971078-87973391+	exon sense-overlapping	ENSMUST00000090973	Nes	chr3:87971093-87980451+
chr7	141447907	141448230	MACS_peak_178289	1684.31	323	ENSMUST00000140099	Rplp2	1684.31	4.19	4.76	Ensembl	786	chr7:141447631-141448616+	exon sense-overlapping	ENSMUST00000084434	Rplp2	chr7:141447370-141451585+
chr1	72848886	72849312	MACS_peak_4768	1680.64	426	ENSMUST00000155703	Igfbp2	1680.64	4.22	4.73	Ensembl	906	chr1:72848699-72852148+	exon sense-overlapping	ENSMUST00000047328	Igfbp2	chr1:72824503-72852474+
chr2	32629520	32629884	MACS_peak_103272	1633.91	364	ENSMUST00000135392	Ak1	1633.91	7.86	4.63	Ensembl	752	chr2:32629521-32633400+	exon sense-overlapping	ENSMUST00000068271	Ak1	chr2:32629504-32635052+
chr9	107770077	107770959	MACS_peak_200071	1628.38	882	ENSMUST00000181993	Rbm5	1628.38	20.06	4.62	Ensembl	1775	chr9:107769185-107770959-	exon sense-overlapping	ENSMUST00000035199	Rbm5	chr9:107740500-107770987-
chr5	115544113	115544569	MACS_peak_149603	1605.46	456	ENSMUST00000134198	Pxn	1605.46	18.34	4.66	Ensembl	524	chr5:115544114-115544948+	exon sense-overlapping	ENSMUST00000067268	Pxn	chr5:115506676-115555987+
chr11	69346284	69346813	MACS_peak_29485	1587.43	529	ENSMUST00000146930	Chd3	1587.43	11.27	5.5	Ensembl	747	chr11:69346136-69347134-	exon sense-overlapping	ENSMUST00000092971	Chd3	chr11:69344351-69369391-
chr2	167617674	167617977	MACS_peak_112960	1574.77	303	ENSMUST00000144830	Ube2v1	1574.77	9.14	5.48	Ensembl	433	chr2:167617588-167631982-	exon sense-overlapping	ENSMUST00000060645	Ube2v1	chr2:167607844-167631972-
chr2	113919717	113920562	MACS_peak_107293	1571.98	845	ENSMUST00000178049	Gm21596	1571.98	7.78	5.46	Ensembl	1316	chr2:113919247-113920562-	intergenic	NA	NA	NA
chr4	136339018	136340492	MACS_peak_137336	1560.8	1474	ENSMUST00000182327	Hnrnpr	1560.8	9.82	4.77	Ensembl	3948	chr4:136339019-136342966+	exon sense-overlapping	ENSMUST00000084219	Hnrnpr	chr4:136311025-136340863+
chr17	17830892	17832066	MACS_peak_80762	1554.53	1174	ENSMUST00000178408	4930546H06Rik	1554.53	22.62	4.75	Ensembl	1174	chr17:17830893-17832066+	exon sense-overlapping	ENSMUST00000150302	4930546H06Rik	chr17:17831444-17837723+
chr4	3973200	3973732	MACS_peak_124395	1547.24	532	uc008rwv.1	DQ072386	1547.24	6.75	5.46	UCSC_knowngene	1025	chr4:3971119-3974055+	natural antisense	ENSMUST00000089430	Gm11808	chr4:3973107-3973581-
chr16	84977579	84978584	MACS_peak_77935	1538.46	1005	uc007zts.1	Gm10791	1538.46	13.31	4.69	UCSC_knowngene	3429	chr16:84972211-84979451+	natural antisense	ENSMUST00000005406	App	chr16:84954440-85173707-
chr11	50298837	50299344	MACS_peak_25287	1527.45	507	ENSMUST00000155801	Canx	1527.45	8.52	8.9	Ensembl	600	chr11:50298838-50300990-	exon sense-overlapping	ENSMUST00000020637	Canx	chr11:50294467-50325673-
chr11	72447552	72447882	MACS_peak_30058	1514.29	330	ENSMUST00000152894	Mybbp1a	1514.29	16.85	4.71	Ensembl	4448	chr11:72441355-72451768+	exon sense-overlapping	ENSMUST00000045633	Mybbp1a	chr11:72441355-72451768+
chr4	133011564	133011958	MACS_peak_123410	1502.32	394	ENSMUST00000145682	Ahdc1	1502.32	20.57	8.86	Ensembl	560	chr4:133011565-133055083+	exon sense-overlapping	ENSMUST00000044521	Ahdc1	chr4:133012204-133077645+
chr11	97833354	97833702	MACS_peak_32962	1497.22	348	ENSMUST00000127575	Lasp1	1497.22	12.75	5.5	Ensembl	758	chr11:97833183-97836205+	exon sense-overlapping	ENSMUST00000043843	Lasp1	chr11:97799565-97838764+
chr3	95117915	95118377	MACS_peak_121985	1484.91	462	ENSMUST00000152333	Vps72	1484.91	20.23	4.82	Ensembl	2139	chr3:95116526-95119302+	exon sense-overlapping	ENSMUST00000009102	Vps72	chr3:95111022-95123051+
chr12	85219821	85220245	MACS_peak_43178	1470.83	424	ENSMUST00000128709	Eif2b2	1470.83	20.16	4.78	Ensembl	935	chr12:85219582-85223488+	exon sense-overlapping	ENSMUST00000004910	Eif2b2	chr12:85219481-85226628+
chr4	132532640	132533387	MACS_peak_136711	1466.47	747	ENSMUST00000145795	Atpif1	1466.47	7.68	4.76	Ensembl	1014	chr4:132532488-132533595-	exon sense-overlapping	ENSMUST00000067496	Atpif1	chr4:132530555-132533659-
chr4	151957102	151957495	MACS_peak_136850	1457.77	393	ENSMUST00000133959	Dnajc11	1457.77	32.66	5.6	Ensembl	688	chr4:151933734-151957495+	exon sense-overlapping	ENSMUST00000062904	Dnajc11	chr4:151933691-151982137+
chr2	25560539	25561209	MACS_peak_92357	1443.35	670	ENSMUST00000134689	Edf1	1443.35	10.29	8.59	Ensembl	910	chr2:25557897-25561264+	exon sense-overlapping	ENSMUST00000015236	Edf1	chr2:25557847-25562082+
chr2	30981777	30982201	MACS_peak_101142	1435.92	424	ENSMUST00000156325	BC005624	1435.92	16.29	5.64	Ensembl	1064	chr2:30980903-30982201-	exon sense-overlapping	ENSMUST00000028205	BC005624	chr2:30972833-30981941-
chr11	30110725	30111116	MACS_peak_23878	1432.94	391	ENSMUST00000127209	Sptbn1	1432.94	7.75	8.51	Ensembl	744	chr11:30109871-30111359-	exon sense-overlapping	ENSMUST00000006629	Sptbn1	chr11:30099395-30268169-
chr5	138161673	138162225	MACS_peak_153089	1424.11	552	ENSMUST00000127881	Cops6	1424.11	7.56	4.82	Ensembl	812	chr5:138161109-138162384+	exon sense-overlapping	ENSMUST00000019638	Cops6	chr5:138161071-138164646+
chr11	6397506	6397848	MACS_peak_24745	1414.11	342	ENSMUST00000124588	Zmiz2	1414.11	6.49	4.77	Ensembl	723	chr11:6396729-6397848+	exon sense-overlapping	ENSMUST00000012612	Zmiz2	chr11:6389364-6406158+
chr19	5842600	5845480	MACS_peak_93497	1413.04	2880	NR_003513	Neat1	1413.04	23.92	5.6	RefSeq	3190	chr19:5842296-5845480-	intergenic	NA	NA	NA
chr7	28395424	28395872	MACS_peak_151861	1399.35	448	ENSMUST00000152512	Paf1	1399.35	13.1	8.38	Ensembl	576	chr7:28395425-28396079+	exon sense-overlapping	ENSMUST00000003529	Paf1	chr7:28392951-28399388+
chr7	73558038	73558395	MACS_peak_155120	1393.09	357	NR_037569	1810026B05Rik	1393.09	16.83	8.52	RefSeq	5157	chr7:73539798-73558395-	exon sense-overlapping	ENSMUST00000169922	Chd2	chr7:73426691-73541746-
chr10	42762319	42763176	MACS_peak_15373	1379.5	857	ENSMUST00000181674	Gm26860	1379.5	33.96	8.53	Ensembl	1489	chr10:42761596-42763635-	natural antisense	ENSMUST00000019937	Sec63	chr10:42761496-42832514+
chr9	49567349	49567663	MACS_peak_194507	1370.03	314	NR_029465	Gm11149	1370.03	10.13	4.73	RefSeq	1275	chr9:49518288-49568025+	exon sense-overlapping	ENSMUST00000068730	Gm11149	chr9:49518336-49562944+
chr16	3926427	3926740	MACS_peak_70090	1363.28	313	ENSMUST00000121410	Gm15538	1363.28	23.84	5.47	Ensembl	313	chr16:3926428-3926740+	intron sense-overlapping	ENSMUST00000040881	Cluap1	chr16:3908825-3941147+
chr10	128548475	128548973	MACS_peak_24034	1338.43	498	ENSMUST00000176966	Rpl41	1338.43	9.95	5.45	Ensembl	523	chr10:128548476-128549112-	exon sense-overlapping	ENSMUST00000176010	Rpl41	chr10:128548114-128549305-
chr19	44069271	44069744	MACS_peak_96607	1330.15	473	ENSMUST00000170577	Erlin1	1330.15	22.72	5.42	Ensembl	2083	chr19:44066072-44069744-	exon sense-overlapping	ENSMUST00000071698	Erlin1	chr19:44034944-44069775-
chr8	122407842	122408562	MACS_peak_170885	1326.36	720	ENSMUST00000177123	Zc3h18	1326.36	34.49	8.71	Ensembl	4789	chr8:122407843-122417359+	exon sense-overlapping	ENSMUST00000017622	Zc3h18	chr8:122376609-122417359+
chr2	32712564	32713076	MACS_peak_101520	1315.66	512	ENSMUST00000123170	Cdk9	1315.66	18.33	5.4	Ensembl	1689	chr2:32707849-32713076-	exon sense-overlapping	ENSMUST00000009699	Cdk9	chr2:32707438-32712784-
chr7	44863534	44864487	MACS_peak_169164	1287.97	953	ENSMUST00000140732	Ptov1	1287.97	11.81	4.73	Ensembl	2932	chr7:44863068-44866774-	exon sense-overlapping	ENSMUST00000046575	Ptov1	chr7:44863068-44869788-
chr7	16280857	16281166	MACS_peak_166775	1269.09	309	ENSMUST00000129447	Ccdc9	1269.09	20.23	4.86	Ensembl	748	chr7:16276594-16281166-	exon sense-overlapping	ENSMUST00000041010	Ccdc9	chr7:16275464-16285059-
chr15	98657892	98658435	MACS_peak_70417	1252.29	543	ENSMUST00000159170	Ddx23	1252.29	13.32	4.83	Ensembl	610	chr15:98657893-98662889-	exon sense-overlapping	ENSMUST00000003450	Ddx23	chr15:98645134-98662889-
chr3	96579797	96580155	MACS_peak_122280	1251.4	358	ENSMUST00000141579	Polr3gl	1251.4	17.73	4.82	Ensembl	545	chr3:96578402-96580155-	exon sense-overlapping	ENSMUST00000091924	Polr3gl	chr3:96577872-96594181-
chr11	94297758	94298119	MACS_peak_32489	1251.23	361	ENSMUST00000171033	Luc7l3	1251.23	8.3	5.22	Ensembl	621	chr11:94297007-94298218-	exon sense-overlapping	ENSMUST00000021226	Luc7l3	chr11:94291139-94321988-
chr4	109403209	109403993	MACS_peak_131516	1250.96	784	NR_131195	Gm12750	1250.96	44.64	5.22	RefSeq	2532	chr4:109402279-109406257-	bidirectional	ENSMUST00000064129	Ttc39a	chr4:109407087-109444745+
chr10	80126032	80126509	MACS_peak_19815	1233.5	477	ENSMUST00000129235	Stk11	1233.5	17.52	5.22	Ensembl	671	chr10:80125375-80126509+	exon sense-overlapping	ENSMUST00000003152	Stk11	chr10:80115803-80130682+
chr4	155657854	155658301	MACS_peak_137442	1188.7	447	ENSMUST00000130237	Mib2	1188.7	26.53	5.46	Ensembl	622	chr4:155657624-155658339-	exon sense-overlapping	ENSMUST00000103176	Mib2	chr4:155654682-155669198-
chr10	80137287	80137647	MACS_peak_19799	1186.38	360	ENSMUST00000136260	Dos	1186.38	12.14	4.69	Ensembl	601	chr10:80136708-80137647-	exon sense-overlapping	ENSMUST00000105369	Dos	chr10:80130551-80139365-
chr7	16831024	16831639	MACS_peak_166891	1182.31	615	ENSMUST00000123247	Strn4	1182.31	29.69	4.74	Ensembl	813	chr7:16828779-16831639+	exon sense-overlapping	ENSMUST00000019220	Strn4	chr7:16815889-16840931+
chr11	88182302	88182607	MACS_peak_32308	1165.51	305	ENSMUST00000132377	Cuedc1	1165.51	28.78	4.73	Ensembl	347	chr11:88182303-88183280+	exon sense-overlapping	ENSMUST00000018522	Cuedc1	chr11:88099146-88194140+
chr8	93950301	93950627	MACS_peak_182461	1165.5	326	ENSMUST00000130974	Gnao1	1165.5	9.28	5.54	Ensembl	402	chr8:93949505-93950675+	exon sense-overlapping	ENSMUST00000034198	Gnao1	chr8:93810838-93969388+
chr14	18888090	18888449	MACS_peak_55354	1163.73	359	ENSMUST00000144873	Ube2e2	1163.73	11.28	4.71	Ensembl	2135	chr14:18886367-18893279-	exon sense-overlapping	ENSMUST00000076133	Ube2e2	chr14:18574294-18888441-
chrX	146175941	146176577	MACS_peak_202030	1158.69	636	ENSMUST00000117548	Hmgb1-ps2	1158.69	8.43	5.49	Ensembl	636	chrX:146175942-146176577+	intergenic	NA	NA	NA
chr10	63022623	63023838	MACS_peak_18175	1154.88	1215	uc007fjq.3	AK156477	1154.88	20.02	4.72	UCSC_knowngene	1294	chr10:63022545-63023838-	exon sense-overlapping	ENSMUST00000020263	Hnrnph3	chr10:63014664-63023894-
chr3	10014624	10015573	MACS_peak_116719	1151.64	949	ENSMUST00000123744	Fabp5	1151.64	7.67	4.7	Ensembl	3238	chr3:10012605-10016335+	exon sense-overlapping	ENSMUST00000029046	Fabp5	chr3:10012548-10016607+
chr12	80112682	80113000	MACS_peak_42226	1149.47	318	ENSMUST00000181323	Gm26669	1149.47	17.99	4.68	Ensembl	1808	chr12:80108034-80113000+	natural antisense	ENSMUST00000021552	Zfp36l1	chr12:80107760-80113013-
chr6	100604682	100605120	MACS_peak_159100	1136.48	438	ENSMUST00000121217	Gm6565	1136.48	29.13	5.42	Ensembl	438	chr6:100604683-100605120+	intronic antisense	ENSMUST00000089245	Shq1	chr6:100573083-100671139-
chr4	154159899	154160261	MACS_peak_139884	1128.11	362	ENSMUST00000133165	Tprgl	1128.11	10.2	4.68	Ensembl	947	chr4:154159567-154160606-	exon sense-overlapping	ENSMUST00000030896	Tprgl	chr4:154157485-154160666-
chr9	106890797	106891198	MACS_peak_180575	1119.58	401	ENSMUST00000162801	Manf	1119.58	10.28	8.39	Ensembl	741	chr9:106890562-106891917-	exon sense-overlapping	ENSMUST00000069036	Manf	chr9:106888762-106891415-
chr17	80204621	80205081	MACS_peak_86222	1117.19	460	NR_036615	Srsf7	1117.19	20.22	4.73	RefSeq	2752	chr17:80200080-80207305-	exon sense-overlapping	ENSMUST00000063417	Srsf7	chr17:80200089-80207305-
chr2	109896235	109896637	MACS_peak_108781	1112.44	402	ENSMUST00000151163	Lin7c	1112.44	12.59	4.71	Ensembl	746	chr2:109890870-109896738+	exon sense-overlapping	ENSMUST00000028583	Lin7c	chr2:109890853-109901003+
chr11	116146435	116146997	MACS_peak_35805	1107.51	562	ENSMUST00000126861	Fbf1	1107.51	14.03	4.69	Ensembl	3391	chr11:116142285-116147139-	exon sense-overlapping	ENSMUST00000103031	Fbf1	chr11:116142285-116168153-
chr11	23256057	23256717	MACS_peak_25415	1105.73	660	ENSMUST00000149371	Xpo1	1105.73	8.04	5.42	Ensembl	2902	chr11:23256058-23282726+	exon sense-overlapping	ENSMUST00000020538	Xpo1	chr11:23256041-23297597+
chr7	30292154	30292673	MACS_peak_168280	1088.3	519	ENSMUST00000145253	Clip3	1088.3	10.44	4.67	Ensembl	634	chr7:30291728-30292673+	exon sense-overlapping	ENSMUST00000014065	Clip3	chr7:30291672-30308367+
chr12	3835026	3835458	MACS_peak_37207	1087.87	432	ENSMUST00000173700	Dnmt3a	1087.87	14.91	4.67	Ensembl	4014	chr12:3806007-3838814+	exon sense-overlapping	ENSMUST00000020991	Dnmt3a	chr12:3807030-3914443+
chr5	110106652	110107202	MACS_peak_148552	1082.35	550	ENSMUST00000127628	Gtpbp6	1082.35	19.09	4.63	Ensembl	1481	chr5:110103979-110107202-	exon sense-overlapping	ENSMUST00000077220	Gtpbp6	chr5:110103975-110108197-
chr1	171344287	171345482	MACS_peak_10769	1080.76	1195	ENSMUST00000146428	Nit1	1080.76	30.39	8.06	Ensembl	2196	chr1:171338008-171345482-	exon sense-overlapping	ENSMUST00000111289	Nit1	chr1:171340571-171345646-
chr10	79977074	79977853	MACS_peak_19764	1079.77	779	ENSMUST00000126383	Tmem259	1079.77	7.98	4.67	Ensembl	2656	chr10:79975890-79978940-	exon sense-overlapping	ENSMUST00000052885	Tmem259	chr10:79977118-79984330-
chr17	32284786	32285501	MACS_peak_82573	1077.96	715	ENSMUST00000181112	Gm26549	1077.96	21.98	4.65	Ensembl	1209	chr17:32284787-32298689+	bidirectional	ENSMUST00000003726	Brd4	chr17:32196276-32284097-
chr8	105637065	105637579	MACS_peak_186937	1068.37	514	ENSMUST00000129388	Ctcf	1068.37	16.04	4.65	Ensembl	729	chr8:105637066-105663851+	exon sense-overlapping	ENSMUST00000005841	Ctcf	chr8:105636579-105682922+
chr4	11321714	11322100	MACS_peak_124798	1061.44	386	ENSMUST00000148524	Dpy19l4	1061.44	21.84	5.53	Ensembl	471	chr4:11317096-11322100-	exon sense-overlapping	ENSMUST00000084892	Dpy19l4	chr4:11261315-11322137-
chr12	24708938	24709539	MACS_peak_38504	1059.34	601	ENSMUST00000147789	Rrm2	1059.34	13.77	4.71	Ensembl	730	chr12:24708556-24709589+	exon sense-overlapping	ENSMUST00000020980	Rrm2	chr12:24708241-24714146+
chr4	132551294	132551610	MACS_peak_136718	1058.08	316	ENSMUST00000105937	Dnajc8	1058.08	16.11	4.81	Ensembl	743	chr4:132551295-132553443+	exon sense-overlapping	ENSMUST00000094657	Dnajc8	chr4:132535550-132553742+
chr17	56568894	56569434	MACS_peak_84499	1054.56	540	ENSMUST00000127947	Safb2	1054.56	10.46	4.79	Ensembl	632	chr17:56567533-56569434-	exon sense-overlapping	ENSMUST00000075510	Safb2	chr17:56562939-56584585-
chr17	80728130	80728487	MACS_peak_85010	1053.65	357	ENSMUST00000068277	Gm9959	1053.65	17.17	5.54	Ensembl	390	chr17:80728131-80728522+	bidirectional	ENSMUST00000025089	Map4k3	chr17:80580512-80728093-
chr6	83119044	83120044	MACS_peak_157137	1050.44	1000	ENSMUST00000151393	Wbp1	1050.44	24.32	5.52	Ensembl	2046	chr6:83119045-83121559-	exon sense-overlapping	ENSMUST00000032111	Wbp1	chr6:83119044-83121559-
chr17	35138585	35138965	MACS_peak_82984	1048.85	380	ENSMUST00000172889	Bag6	1048.85	6.57	4.76	Ensembl	611	chr17:35136123-35138965+	exon sense-overlapping	ENSMUST00000025250	Bag6	chr17:35135178-35147322+
chr13	98316421	98317112	MACS_peak_52760	1047.74	691	ENSMUST00000062252	Gm9828	1047.74	9.56	4.75	Ensembl	883	chr13:98316422-98317304+	natural antisense	ENSMUST00000022163	Btf3	chr13:98309896-98316967-
chr3	107671735	107672136	MACS_peak_121050	1032.52	401	ENSMUST00000138116	Ahcyl1	1032.52	8.54	5.44	Ensembl	2580	chr3:107671736-107696505-	exon sense-overlapping	ENSMUST00000029490	Ahcyl1	chr3:107663120-107696560-
chr1	75547232	75547744	MACS_peak_5087	1006.99	512	ENSMUST00000145516	Slc4a3	1006.99	8.47	4.7	Ensembl	706	chr1:75546527-75547744+	exon sense-overlapping	ENSMUST00000124341	Slc4a3	chr1:75546266-75562172+
chrX	68712077	68712413	MACS_peak_203825	995.21	336	ENSMUST00000127993	Fmr1	995.21	8.65	4.73	Ensembl	646	chrX:68711851-68713323+	exon sense-overlapping	ENSMUST00000088546	Fmr1	chrX:68678541-68717963+
chr8	70531521	70532245	MACS_peak_184022	994.16	724	ENSMUST00000144766	Fkbp8	994.16	8.24	4.72	Ensembl	1551	chr8:70527762-70532453+	exon sense-overlapping	ENSMUST00000075491	Fkbp8	chr8:70527747-70535326+
chr4	125504287	125504839	MACS_peak_132905	992.78	552	ENSMUST00000118517	Ftl2	992.78	13.41	5.34	Ensembl	552	chr4:125504288-125504839+	intron sense-overlapping	ENSMUST00000030676	Grik3	chr4:125490700-125714173+
chr6	146554491	146554812	MACS_peak_162653	991.77	321	ENSMUST00000132963	Asun	991.77	19.1	5.33	Ensembl	454	chr6:146554082-146554812-	exon sense-overlapping	ENSMUST00000032427	Asun	chr6:146549632-146577835-
chr7	35642614	35643044	MACS_peak_165375	991.53	430	ENSMUST00000151336	Pdcd5	991.53	20.32	5.33	Ensembl	602	chr7:35642014-35643044-	exon sense-overlapping	ENSMUST00000118501	Pdcd5	chr7:35641982-35647521-
chr15	36597972	36598312	MACS_peak_64864	986.8	340	ENSMUST00000146577	Pabpc1	986.8	8.94	4.69	Ensembl	725	chr15:36596024-36598312-	exon sense-overlapping	ENSMUST00000001809	Pabpc1	chr15:36595661-36608973-
chr11	69340583	69341058	MACS_peak_27199	984.36	475	ENSMUST00000129321	A030009H04Rik	984.36	16.41	7.86	Ensembl	2081	chr11:69340461-69342641+	intergenic	NA	NA	NA
chr5	29750738	29751047	MACS_peak_128715	982.14	309	ENSMUST00000151976	Dnajb6	982.14	6.51	7.86	Ensembl	668	chr5:29750722-29752738+	exon sense-overlapping	ENSMUST00000008733	Dnajb6	chr5:29735688-29786478+
chr2	30237779	30238223	MACS_peak_102765	978.26	444	ENSMUST00000063984	1700084E18Rik	978.26	31.61	4.65	Ensembl	729	chr2:30237493-30238223-	natural antisense	ENSMUST00000095078	Lrrc8a	chr2:30237722-30263790+
chr5	125025651	125026087	MACS_peak_136523	973.73	436	ENSMUST00000130742	Ncor2	973.73	11.82	7.83	Ensembl	683	chr5:125025102-125026087-	exon sense-overlapping	ENSMUST00000055256	Ncor2	chr5:125017835-125124900-
chr16	18248678	18250033	MACS_peak_71993	970.3	1355	ENSMUST00000127239	Trmt2a	970.3	22.8	5.32	Ensembl	2805	chr16:18248679-18253502+	exon sense-overlapping	ENSMUST00000100099	Trmt2a	chr16:18249062-18253502+
chr11	74836325	74836948	MACS_peak_30275	967.55	623	ENSMUST00000133217	Mnt	967.55	14.08	4.61	Ensembl	777	chr11:74836326-74837723+	exon sense-overlapping	ENSMUST00000000291	Mnt	chr11:74830920-74845725+
chr3	28630241	28630615	MACS_peak_117689	965.41	374	ENSMUST00000162225	Tnik	965.41	7.33	4.59	Ensembl	826	chr3:28629872-28638469+	exon sense-overlapping	ENSMUST00000159236	Tnik	chr3:28263215-28675858+
chr8	109340590	109340908	MACS_peak_187372	959.62	318	NR_002928	Gm1943	959.62	18.25	4.65	RefSeq	1122	chr8:109339800-109340908-	intergenic	NA	NA	NA
chr17	33759991	33760587	MACS_peak_82781	949.51	596	uc008bzo.1	AK133808	949.51	20.32	4.65	UCSC_knowngene	925	chr17:33759992-33761870+	natural antisense	ENSMUST00000057373	Rab11b	chr17:33742484-33760530-
chr1	89678306	89678876	MACS_peak_6150	947.92	570	NR_015540	4933400F21Rik	947.92	41.64	4.69	RefSeq	3611	chr1:89676507-89683892-	intronic antisense	ENSMUST00000027521	Agap1	chr1:89454811-89895282+
chr10	128475064	128475374	MACS_peak_24017	946.13	310	uc007hna.1	AK163775	946.13	11.56	5.33	UCSC_knowngene	2416	chr10:128475065-128477480+	intron sense-overlapping	ENSMUST00000026433	Smarcc2	chr10:128459236-128490173+
chr3	127498371	127499259	MACS_peak_122230	943.57	888	ENSMUST00000104965	Ank2	943.57	16.14	5.32	Ensembl	3153	chr3:127496107-127499259-	exon sense-overlapping	ENSMUST00000182594	Ank2	chr3:126923957-127499115-
chr5	72914417	72915698	MACS_peak_131703	935.36	1281	ENSMUST00000183284	Slain2	935.36	8.73	7.9	Ensembl	4068	chr5:72914418-72918485+	exon sense-overlapping	ENSMUST00000143829	Slain2	chr5:72914625-72978829+
chr11	20334833	20335465	MACS_peak_25297	932.95	632	ENSMUST00000109588	Gm12033	932.95	9.94	4.65	Ensembl	1253	chr11:20334834-20336086-	intergenic	NA	NA	NA
chr4	146564452	146565087	MACS_peak_125131	931.35	635	ENSMUST00000122151	Gm13237	931.35	7.53	8.01	Ensembl	635	chr4:146564453-146565087-	intergenic	NA	NA	NA
chr4	147086357	147086984	MACS_peak_138763	931.1	627	ENSMUST00000118441	Gm13160	931.1	18.76	4.64	Ensembl	627	chr4:147086358-147086984-	intergenic	NA	NA	NA
chr17	46161716	46162158	MACS_peak_82221	912.67	442	ENSMUST00000165686	Gtpbp2	912.67	27.7	5.37	Ensembl	608	chr17:46161161-46162158+	exon sense-overlapping	ENSMUST00000024748	Gtpbp2	chr17:46161032-46169370+
chr13	9689062	9689923	MACS_peak_46088	911.82	861	ENSMUST00000137932	Zmynd11	911.82	5.88	5.37	Ensembl	4355	chr13:9684841-9691273-	exon sense-overlapping	ENSMUST00000062658	Zmynd11	chr13:9684838-9765160-
chr6	134566642	134566965	MACS_peak_149039	909.63	323	ENSMUST00000126836	Lrp6	909.63	19.26	8.05	Ensembl	722	chr6:134511284-134566965-	exon sense-overlapping	ENSMUST00000032322	Lrp6	chr6:134446476-134566913-
chr5	3803183	3804223	MACS_peak_140488	908.54	1040	uc008whr.2	AK046128	908.54	15.08	4.7	UCSC_knowngene	2855	chr5:3803184-3806038+	exon sense-overlapping	ENSMUST00000080085	Krit1	chr5:3803165-3844515+
chr5	63649154	63650893	MACS_peak_145061	907.54	1739	uc008xmc.1	BC079612	907.54	16.04	4.69	UCSC_knowngene	4723	chr5:63646171-63650893-	exon sense-overlapping	ENSMUST00000067917	Gm9954	chr5:63649950-63650264-
chr11	98753289	98753777	MACS_peak_33410	899	488	ENSMUST00000150693	Thra	899	10.18	4.65	Ensembl	654	chr11:98744233-98753777+	exon sense-overlapping	ENSMUST00000064187	Thra	chr11:98741811-98769006+
chr2	153393396	153393787	MACS_peak_110900	890.93	391	ENSMUST00000138571	Asxl1	890.93	18.71	5.48	Ensembl	717	chr2:153392860-153396837+	exon sense-overlapping	ENSMUST00000109790	Asxl1	chr2:153345845-153404007+
chr12	81532364	81532877	MACS_peak_38511	889.55	513	ENSMUST00000168961	Gm20498	889.55	22.56	8.15	Ensembl	714	chr12:81474617-81532877-	exon sense-overlapping	ENSMUST00000002757	Cox16	chr12:81470704-81485120-
chr17	56009932	56010513	MACS_peak_84335	880.95	581	ENSMUST00000140926	Mpnd	880.95	12.6	4.62	Ensembl	755	chr17:56009933-56011667+	exon sense-overlapping	ENSMUST00000133998	Mpnd	chr17:56005711-56011924+
chr13	51100387	51100727	MACS_peak_49703	878.2	340	NR_029463	9430083A17Rik	878.2	24.68	4.6	RefSeq	2990	chr13:51097738-51100727-	bidirectional	ENSMUST00000095797	Spin1	chr13:51100880-51152546+
chr9	112235102	112236020	MACS_peak_200767	877.62	918	ENSMUST00000149308	2900079G21Rik	877.62	10.55	4.6	Ensembl	1019	chr9:112234277-112236020+	natural antisense	ENSMUST00000159055	Arpp21	chr9:112155476-112235018-
chr16	31428529	31429343	MACS_peak_74258	875.39	814	ENSMUST00000182690	Gm15743	875.39	14.68	4.57	Ensembl	1901	chr16:31427876-31429776-	intronic antisense	ENSMUST00000089759	Bdh1	chr16:31422280-31457497+
chr8	70776861	70777520	MACS_peak_180225	868.53	659	NR_029440	2010320M18Rik	868.53	19.67	5.37	RefSeq	745	chr8:70776862-70777606+	bidirectional	ENSMUST00000034296	Pik3r2	chr8:70768176-70776713-
chrX	74367742	74368258	MACS_peak_199642	859.26	516	ENSMUST00000126191	Ubl4	859.26	22.6	5.39	Ensembl	614	chrX:74367743-74368513-	exon sense-overlapping	ENSMUST00000155676	Ubl4	chrX:74365718-74368673-
chr6	47577543	47577865	MACS_peak_158058	854.59	322	ENSMUST00000170327	Ezh2	854.59	10.26	4.48	Ensembl	837	chr6:47556027-47578010-	exon sense-overlapping	ENSMUST00000081721	Ezh2	chr6:47530274-47595030-
chr11	96911455	96912009	MACS_peak_33022	846.02	554	ENSMUST00000149033	Cdk5rap3	846.02	15.18	4.47	Ensembl	1207	chr11:96911456-96912869-	exon sense-overlapping	ENSMUST00000103152	Cdk5rap3	chr11:96907426-96916496-
chr17	6121827	6123212	MACS_peak_78480	845.15	1385	uc012aji.1	AK077171	845.15	17.82	5.48	UCSC_knowngene	2527	chr17:6106437-6124137+	exon sense-overlapping	ENSMUST00000142030	Tulp4	chr17:6106479-6206914+
chr13	104792498	104793391	MACS_peak_52406	843.41	893	uc007rtl.1	AK030777	843.41	14.68	5.47	UCSC_knowngene	1995	chr13:104792499-104794493-	exon sense-overlapping	ENSMUST00000022228	Cwc27	chr13:104631140-104816953-
chr4	130816844	130817161	MACS_peak_136529	840.88	317	ENSMUST00000146093	Sdc3	840.88	6	4.45	Ensembl	528	chr4:130792704-130817273+	exon sense-overlapping	ENSMUST00000070478	Sdc3	chr4:130792537-130826319+
chr19	44554732	44555057	MACS_peak_98373	840.18	325	ENSMUST00000166557	Ndufb8	840.18	5.58	4.44	Ensembl	450	chr19:44554715-44555423-	exon sense-overlapping	ENSMUST00000026222	Ndufb8	chr19:44550240-44555440-
chr11	75598179	75598523	MACS_peak_30430	839.75	344	ENSMUST00000140841	Pitpna	839.75	7.37	4.44	Ensembl	594	chr11:75588159-75598548+	exon sense-overlapping	ENSMUST00000143219	Pitpna	chr11:75588097-75628804+
chr1	87543635	87544292	MACS_peak_6005	827.53	657	ENSMUST00000172004	Gm6153	827.53	38.45	5.62	Ensembl	1058	chr1:87543635-87544692-	intron sense-overlapping	ENSMUST00000068681	Ngef	chr1:87476834-87573870-
chr9	124423786	124424603	MACS_peak_201972	826.77	817	NR_015516	4930526I15Rik	826.77	9.98	4.5	RefSeq	1571	chr9:124423787-124424856+	natural antisense	ENSMUST00000180270	Ppp2r3d	chr9:124422622-124424154-
chr10	128408315	128408843	MACS_peak_24050	821.88	528	ENSMUST00000167456	Nabp2	821.88	8.55	4.61	Ensembl	929	chr10:128401590-128408843-	exon sense-overlapping	ENSMUST00000026439	Nabp2	chr10:128401395-128409874-
chr6	39871531	39871971	MACS_peak_142490	821.24	440	ENSMUST00000180899	Gm26833	821.24	12.54	8.7	Ensembl	440	chr6:39871532-39871971-	intergenic	NA	NA	NA
chr9	118925267	118925777	MACS_peak_201328	819.32	510	ENSMUST00000139512	Gm16295	819.32	17.35	4.64	Ensembl	643	chr9:118924873-118925777+	intergenic	NA	NA	NA
chr6	37805974	37807091	MACS_peak_142184	816.87	1117	ENSMUST00000116500	Gm15487	816.87	26.2	8.76	Ensembl	1117	chr6:37805975-37807091+	intergenic	NA	NA	NA
chr19	16780546	16780951	MACS_peak_96052	816.3	405	ENSMUST00000051080	Gm9806	816.3	16.6	4.63	Ensembl	552	chr19:16780547-16781103+	natural antisense	ENSMUST00000068156	Vps13a	chr19:16616763-16780822-
chrX	38455011	38455356	MACS_peak_198524	813.18	345	uc009szz.1	Lamp2	813.18	14.77	5.58	UCSC_knowngene	2674	chrX:38452890-38456455-	exon sense-overlapping	ENSMUST00000016678	Lamp2	chrX:38405062-38456454-
chr10	80826681	80828633	MACS_peak_19964	807.65	1952	ENSMUST00000179894	Oaz1	807.65	12.75	4.65	Ensembl	2526	chr10:80826682-80829284+	exon sense-overlapping	ENSMUST00000060987	Oaz1	chr10:80826656-80829290+
chr4	83464654	83465338	MACS_peak_129244	800.43	684	uc008tky.1	AK048571	800.43	4.15	5.53	UCSC_knowngene	2266	chr4:83463925-83467021+	natural antisense	ENSMUST00000030207	Psip1	chr4:83455680-83486459-
chr2	27452995	27453499	MACS_peak_102287	800	504	ENSMUST00000130932	Brd3	800	9.12	4.6	Ensembl	2893	chr2:27452996-27475653-	exon sense-overlapping	ENSMUST00000028282	Brd3	chr2:27445579-27475398-
chr2	45107773	45110157	MACS_peak_102811	795.33	2384	ENSMUST00000123037	Zeb2	795.33	19.58	5.49	Ensembl	3852	chr2:45106485-45113001-	exon sense-overlapping	ENSMUST00000028229	Zeb2	chr2:44987121-45110464-
chr7	127232587	127233130	MACS_peak_160021	792.68	543	NR_030674	Gm4532	792.68	9.74	8.69	RefSeq	713	chr7:127232418-127233130-	natural antisense	ENSMUST00000106312	Zfp553	chr7:127233061-127238179+
chr3	89177530	89178067	MACS_peak_121513	780.7	537	ENSMUST00000156447	Scamp3	780.7	12.49	4.65	Ensembl	802	chr3:89177531-89179452+	exon sense-overlapping	ENSMUST00000029684	Scamp3	chr3:89177473-89182765+
chr7	30193545	30194101	MACS_peak_168261	780.34	556	ENSMUST00000146852	Capns1	780.34	10.63	4.64	Ensembl	587	chr7:30193546-30195036-	exon sense-overlapping	ENSMUST00000001845	Capns1	chr7:30186942-30195164-
chrX	80194098	80194852	MACS_peak_204385	779.77	754	ENSMUST00000121831	Gm14760	779.77	31.22	4.64	Ensembl	999	chrX:80193854-80194852-	intergenic	NA	NA	NA
chr1	132880354	132880842	MACS_peak_8724	772.19	488	ENSMUST00000159088	Lrrn2	772.19	17.78	4.68	Ensembl	658	chr1:132880355-132937150+	exon sense-overlapping	ENSMUST00000027706	Lrrn2	chr1:132880273-132940005+
chr9	44696036	44696431	MACS_peak_193778	767.97	395	ENSMUST00000133312	Phldb1	767.97	13.31	4.7	Ensembl	422	chr9:44694464-44696431-	exon sense-overlapping	ENSMUST00000034611	Phldb1	chr9:44686308-44735198-
chr4	117285091	117285511	MACS_peak_134461	760.48	420	ENSMUST00000154974	Rnf220	760.48	18.34	4.7	Ensembl	1492	chr4:117285092-117289442-	exon sense-overlapping	ENSMUST00000030439	Rnf220	chr4:117271463-117497052-
chr16	49759118	49759645	MACS_peak_76365	756.93	527	ENSMUST00000127115	Gm15518	756.93	16.45	4.67	Ensembl	2108	chr16:49758576-49798870-	natural antisense	ENSMUST00000046777	Ift57	chr16:49699233-49765126+
chr2	59920294	59920751	MACS_peak_103625	754.14	457	ENSMUST00000152639	Baz2b	754.14	11.65	5.79	Ensembl	2539	chr2:59914180-59923932-	exon sense-overlapping	ENSMUST00000090925	Baz2b	chr2:59899445-60006187-
chr1	42953471	42954800	MACS_peak_2624	751.95	1329	uc007avc.2	Gpr45	751.95	30.33	4.64	UCSC_knowngene	2038	chr1:42952872-42955147+	exon sense-overlapping	ENSMUST00000179655	Gpr45	chr1:42953139-43030781+
chr11	29172233	29172951	MACS_peak_23766	748.96	718	ENSMUST00000129876	A630052C17Rik	748.96	13.63	9.08	Ensembl	2203	chr11:29170909-29173558-	natural antisense	ENSMUST00000020755	Smek2	chr11:29172890-29220797+
chr5	76996973	76997582	MACS_peak_143530	743.96	609	ENSMUST00000132860	Srp72	743.96	9.61	5.85	Ensembl	2355	chr5:76996974-76999937+	exon sense-overlapping	ENSMUST00000101087	Srp72	chr5:76974683-76999937+
chrX	8143847	8144679	MACS_peak_202202	739.13	832	ENSMUST00000141925	Rbm3	739.13	9.98	4.68	Ensembl	1274	chrX:8142890-8145722-	exon sense-overlapping	ENSMUST00000040010	Rbm3	chrX:8138978-8145697-
chr11	6274397	6274870	MACS_peak_24723	735.42	473	ENSMUST00000130621	Tmed4	735.42	8.96	4.66	Ensembl	886	chr11:6271661-6274870-	exon sense-overlapping	ENSMUST00000004508	Tmed4	chr11:6270369-6274870-
chr7	16313516	16313817	MACS_peak_166786	735.18	301	ENSMUST00000147267	Bbc3	735.18	22.16	4.66	Ensembl	881	chr7:16313517-16317697+	exon sense-overlapping	ENSMUST00000002152	Bbc3	chr7:16309616-16318205+
chr3	75878645	75879008	MACS_peak_120393	734.67	363	ENSMUST00000134219	Golim4	734.67	11.03	4.65	Ensembl	2062	chr3:75876479-75879008-	exon sense-overlapping	ENSMUST00000038563	Golim4	chr3:75876383-75956929-
chr11	69341158	69341915	MACS_peak_29482	734.39	757	NR_027827	Chd3os	734.39	21.77	5.77	RefSeq	1779	chr11:69340769-69342647+	intergenic	NA	NA	NA
chr18	5592159	5593505	MACS_peak_79501	731	1346	ENSMUST00000161096	Gm10125	731	25.79	9.05	Ensembl	3491	chr18:5565652-5593505-	intronic antisense	ENSMUST00000025081	Zeb1	chr18:5591860-5775467+
chr2	68861441	68862112	MACS_peak_96069	731	671	ENSMUST00000183755	Cers6	731	11.87	9.04	Ensembl	1283	chr2:68861442-68862724+	exon sense-overlapping	ENSMUST00000028426	Cers6	chr2:68861441-69114282+
chr12	23009844	23010284	MACS_peak_38398	730.69	440	ENSMUST00000149246	2410018L13Rik	730.69	33.63	4.69	Ensembl	3370	chr12:22953999-23010284-	intergenic	NA	NA	NA
chr5	111329993	111330544	MACS_peak_134359	726.65	551	uc012ebe.1	AK039279	726.65	21.16	9.01	UCSC_knowngene	807	chr5:111329738-111330544-	bidirectional	ENSMUST00000086635	Pitpnb	chr5:111330763-111388359+
chr7	107863131	107863500	MACS_peak_174691	719	369	ENSMUST00000122364	Gm10156	719	16.66	4.71	Ensembl	462	chr7:107863039-107863500+	intergenic	NA	NA	NA
chr1	86582299	86582629	MACS_peak_5847	716.81	330	ENSMUST00000143674	Pde6d	716.81	15.69	5.82	Ensembl	1306	chr1:86543022-86582629-	exon sense-overlapping	ENSMUST00000027444	Pde6d	chr1:86542994-86582547-
chr2	35165647	35166223	MACS_peak_103786	716.77	576	ENSMUST00000130457	Cep110	716.77	25.3	4.7	Ensembl	1215	chr2:35161731-35166223+	exon sense-overlapping	ENSMUST00000028237	Cep110	chr2:35109492-35178822+
chr17	35909417	35910093	MACS_peak_83076	708.06	676	uc008ciz.1	AK034502	708.06	9.63	4.78	UCSC_knowngene	2945	chr17:35896946-35912215+	intronic antisense	ENSMUST00000148721	2310061I04Rik	chr17:35892677-35897431-
chr16	64852701	64853025	MACS_peak_75703	704.51	324	ENSMUST00000136532	Cggbp1	704.51	8.62	5.84	Ensembl	760	chr16:64852702-64855986+	exon sense-overlapping	ENSMUST00000067744	Cggbp1	chr16:64851996-64859507+
chr18	80192375	80193497	MACS_peak_92418	703.42	1122	NR_131039	LOC105246506	703.42	13.41	5.86	RefSeq	2708	chr18:80186239-80193569+	natural antisense	ENSMUST00000025462	Rbfa	chr18:80192265-80200658-
chr4	43518401	43519078	MACS_peak_116533	703.01	677	ENSMUST00000150262	Tpm2	703.01	9.78	8.85	Ensembl	1545	chr4:43514711-43523438-	exon sense-overlapping	ENSMUST00000030184	Tpm2	chr4:43514711-43523464-
chr18	37957430	37959654	MACS_peak_90278	693.96	2224	ENSMUST00000165643	Fchsd1	693.96	12.74	4.76	Ensembl	2918	chr18:37957431-37960471-	exon sense-overlapping	ENSMUST00000043437	Fchsd1	chr18:37957434-37969774-
chr15	75896242	75896740	MACS_peak_67284	693.18	498	ENSMUST00000134222	Eef1d	693.18	6.77	4.75	Ensembl	793	chr15:75895492-75896740-	exon sense-overlapping	ENSMUST00000023235	Eef1d	chr15:75895804-75909329-
chr4	132048394	132048961	MACS_peak_136617	689.85	567	ENSMUST00000132247	Gm13063	689.85	12.66	4.76	Ensembl	669	chr4:132048178-132048961+	intronic antisense	ENSMUST00000030739	Epb4.1	chr4:131923429-132072097-
chr2	25406214	25406848	MACS_peak_101982	683.08	634	ENSMUST00000144413	Npdc1	683.08	9.91	4.74	Ensembl	893	chr2:25403107-25406848+	exon sense-overlapping	ENSMUST00000055921	Npdc1	chr2:25403171-25409494+
chr19	10063631	10064017	MACS_peak_94024	678.76	386	uc008gpa.1	AK192544	678.76	9.74	5.89	UCSC_knowngene	386	chr19:10063632-10064017-	intergenic	NA	NA	NA
chr11	74901712	74902166	MACS_peak_30293	678.39	454	ENSMUST00000144019	Tsr1	678.39	9.28	4.7	Ensembl	540	chr11:74901713-74903905+	exon sense-overlapping	ENSMUST00000045807	Tsr1	chr11:74898078-74909342+
chr19	10389129	10389655	MACS_peak_95679	676.82	526	ENSMUST00000181743	Gm26859	676.82	15.2	4.69	Ensembl	1852	chr19:10389130-10391735-	natural antisense	ENSMUST00000073899	Syt7	chr19:10389090-10453181+
chr19	4121176	4121545	MACS_peak_94696	676.01	369	ENSMUST00000136043	Aip	676.01	18.97	4.68	Ensembl	674	chr19:4120933-4125790-	exon sense-overlapping	ENSMUST00000025767	Aip	chr19:4114464-4121575-
chr13	55085609	55086192	MACS_peak_50109	674.65	583	ENSMUST00000128641	Uimc1	674.65	10.1	4.67	Ensembl	654	chr13:55077457-55086192-	exon sense-overlapping	ENSMUST00000026997	Uimc1	chr13:55027880-55100295-
chr17	32312285	32313262	MACS_peak_81354	671.23	977	NR_131218	Akap8	671.23	16.51	5.94	RefSeq	4690	chr17:32303672-32321238-	exon sense-overlapping	ENSMUST00000002699	Akap8	chr17:32303676-32321153-
chr9	108116891	108117718	MACS_peak_195665	668.89	827	ENSMUST00000181473	F630040L22Rik	668.89	15.39	5.95	Ensembl	3155	chr9:108104965-108118343+	natural antisense	ENSMUST00000035208	Bsn	chr9:108096022-108190384-
chr5	123141018	123141666	MACS_peak_150824	666.96	648	ENSMUST00000160255	AI480526	666.96	10.56	4.67	Ensembl	1095	chr5:123134843-123141666-	bidirectional	ENSMUST00000163030	Setd1b	chr5:123142193-123167435+
chr3	88819648	88825414	MACS_peak_121407	666	5766	ENSMUST00000183707	RP23-199B2.4	666	12.68	4.66	Ensembl	6054	chr3:88819645-88832547-	intergenic	NA	NA	NA
chr10	86691628	86692295	MACS_peak_20902	663.9	667	ENSMUST00000129178	Hsp90b1	663.9	6.46	5.96	Ensembl	3222	chr10:86690209-86701968-	exon sense-overlapping	ENSMUST00000020238	Hsp90b1	chr10:86690840-86705509-
chr1	132360104	132361215	MACS_peak_8620	661.66	1111	ENSMUST00000138717	Tmcc2	661.66	6.52	5.93	Ensembl	4004	chr1:132356316-132367886-	exon sense-overlapping	ENSMUST00000045473	Tmcc2	chr1:132356315-132391281-
chr11	20100625	20100933	MACS_peak_25137	659.78	308	ENSMUST00000134779	Actr2	659.78	11.91	5.92	Ensembl	452	chr11:20100587-20112909-	exon sense-overlapping	ENSMUST00000000137	Actr2	chr11:20062304-20112913-
chr2	169883511	169888097	MACS_peak_115066	659.46	4586	ENSMUST00000181446	Gm26883	659.46	11.17	4.65	Ensembl	5115	chr2:169633646-169888503-	natural antisense	ENSMUST00000109157	Tshz2	chr2:169633676-169888504+
chr17	34021682	34023194	MACS_peak_82826	655.73	1512	ENSMUST00000174054	Ring1	655.73	12.04	4.61	Ensembl	2552	chr17:34021084-34023932-	exon sense-overlapping	ENSMUST00000025183	Ring1	chr17:34020792-34024680-
chr17	70976935	70977246	MACS_peak_84299	653.8	311	ENSMUST00000131820	Myl12b	653.8	9.99	5.87	Ensembl	369	chr17:70976936-70990530-	exon sense-overlapping	ENSMUST00000038446	Myl12b	chr17:70973920-70990787-
chr7	61535075	61535488	MACS_peak_170661	653.08	413	NR_045727	B230209E15Rik	653.08	8.35	4.63	RefSeq	2058	chr7:61529410-61615327-	intergenic	NA	NA	NA
chr5	22745952	22746884	MACS_peak_138882	652.68	932	NR_027362	A930003O13Rik	652.68	9.52	5.96	RefSeq	1964	chr5:22738911-22746884-	natural antisense	NM_001081231	Lhfpl3	chr5:22746193-23275597+
chr14	122121552	122122643	MACS_peak_56873	651.53	1091	ENSMUST00000166043	Gm17082	651.53	14.45	8.86	Ensembl	1091	chr14:122121553-122122643+	intron sense-overlapping	ENSMUST00000026624	Tm9sf2	chr14:122107038-122159604+
chr5	114719578	114720268	MACS_peak_149423	649.17	690	ENSMUST00000124242	Tchp	649.17	19.33	4.66	Ensembl	3138	chr5:114707864-114722327+	exon sense-overlapping	ENSMUST00000094441	Tchp	chr5:114707760-114722327+
chrX	103013697	103014387	MACS_peak_185375	644.63	690	ENSMUST00000124538	Pabpc1l2b-ps	644.63	15.56	8.91	Ensembl	690	chrX:103013698-103014387+	intergenic	NA	NA	NA
chr5	24696901	24697409	MACS_peak_139311	643.1	508	ENSMUST00000181925	Gm26648	643.1	8.34	6.01	Ensembl	5831	chr5:24696902-24704690-	natural antisense	ENSMUST00000068825	Nub1	chr5:24685815-24710555+
chr7	138846078	138846515	MACS_peak_177944	639.88	437	ENSMUST00000128157	Ppp2r2d	639.88	10.59	4.66	Ensembl	3823	chr7:138846079-138871702+	exon sense-overlapping	ENSMUST00000041097	Ppp2r2d	chr7:138846359-138883057+
chr11	96800770	96801405	MACS_peak_33009	639.43	635	ENSMUST00000141257	Cbx1	639.43	8.02	4.66	Ensembl	814	chr11:96789175-96801405+	exon sense-overlapping	ENSMUST00000018810	Cbx1	chr11:96789127-96803969+
chr10	73099341	73100216	MACS_peak_18805	638.21	875	uc007fpc.1	AK080816	638.21	16.18	4.66	UCSC_knowngene	1135	chr10:73099342-73484120+	intergenic	NA	NA	NA
chr17	6131853	6132405	MACS_peak_72292	636.31	552	ENSMUST00000078419	Gm15590	636.31	6.79	8.87	Ensembl	552	chr17:6131854-6132405-	intronic antisense	ENSMUST00000142030	Tulp4	chr17:6106479-6206914+
chr2	92390389	92391141	MACS_peak_107663	635.94	752	ENSMUST00000149653	Mapk8ip1	635.94	9.19	4.65	Ensembl	1816	chr2:92389902-92392732-	exon sense-overlapping	ENSMUST00000050312	Mapk8ip1	chr2:92383680-92401263-
chr5	122371875	122372656	MACS_peak_150640	634.38	781	ENSMUST00000127608	Gpn3	634.38	8.06	4.64	Ensembl	2198	chr5:122371876-122382841+	exon sense-overlapping	ENSMUST00000031420	Gpn3	chr5:122372451-122382902+
chr1	75528841	75529261	MACS_peak_5084	629.76	420	ENSMUST00000156838	Stk11ip	629.76	17.49	4.64	Ensembl	2968	chr1:75528640-75536935+	exon sense-overlapping	ENSMUST00000027414	Stk11ip	chr1:75521529-75537335+
chr5	40328455	40329427	MACS_peak_144068	627.89	972	ENSMUST00000118681	Gm2810	627.89	29.81	4.62	Ensembl	990	chr5:40328438-40329427+	intergenic	NA	NA	NA
chr8	4201817	4203079	MACS_peak_161839	626.05	1262	ENSMUST00000177309	Evi5l	626.05	9.21	8.95	Ensembl	1654	chr8:4191292-4203079+	exon sense-overlapping	ENSMUST00000176072	Evi5l	chr8:4166574-4208226+
chr4	59833832	59834193	MACS_peak_128065	621.76	361	ENSMUST00000120410	Gm12543	621.76	29.63	6.09	Ensembl	543	chr4:59833677-59834219+	intron sense-overlapping	ENSMUST00000030080	Snx30	chr4:59805840-59904737+
chr6	34685962	34686597	MACS_peak_156971	621.75	635	ENSMUST00000155714	Cald1	621.75	13.57	4.6	Ensembl	1422	chr6:34598544-34687173+	exon sense-overlapping	ENSMUST00000079391	Cald1	chr6:34598500-34775454+
chr7	19584469	19584823	MACS_peak_167168	621.29	354	NR_125833	Clasrp	621.29	8.48	4.62	RefSeq	2468	chr7:19581038-19604486-	exon sense-overlapping	ENSMUST00000086041	Clasrp	chr7:19581044-19604468-
chr2	180172033	180172397	MACS_peak_116100	620.34	364	ENSMUST00000155357	Adrm1	620.34	9.16	4.61	Ensembl	500	chr2:180171595-180172439+	exon sense-overlapping	ENSMUST00000061437	Adrm1	chr2:180171485-180176286+
chr16	91931236	91931656	MACS_peak_78585	619.03	420	ENSMUST00000141344	D430001F17Rik	619.03	7.17	4.66	Ensembl	1858	chr16:91931237-91962915+	natural antisense	ENSMUST00000023677	Atp5o	chr16:91925214-91931687-
chr9	62341502	62341988	MACS_peak_195848	618.3	486	uc009qai.1	AK028224	618.3	12.11	4.65	UCSC_knowngene	572	chr9:62341503-62344034-	intronic antisense	ENSMUST00000135395	Anp32a	chr9:62342075-62377672+
chr7	109519584	109520802	MACS_peak_174756	614.64	1218	ENSMUST00000132877	Rpl27a	614.64	4.01	4.71	Ensembl	1596	chr7:109519196-109521153+	exon sense-overlapping	ENSMUST00000143107	Rpl27a	chr7:109519147-109522367+
chr7	28364003	28364314	MACS_peak_167917	614.63	311	ENSMUST00000147767	Plekhg2	614.63	8.96	4.71	Ensembl	661	chr7:28364004-28365492-	exon sense-overlapping	ENSMUST00000094644	Plekhg2	chr7:28359604-28372233-
chr7	61290577	61291026	MACS_peak_167220	614.19	449	ENSMUST00000154958	A230006K03Rik	614.19	8.22	6.11	Ensembl	901	chr7:61282739-61311721-	intergenic	NA	NA	NA
chrX	74135132	74135729	MACS_peak_199607	613.76	597	ENSMUST00000119643	Gm6758	613.76	34.91	6.1	Ensembl	1055	chrX:74135133-74136187-	exon sense-overlapping	ENSMUST00000170481	Mecp2	chrX:74026828-74135363-
chr15	100585735	100586772	MACS_peak_70826	607.75	1037	ENSMUST00000176271	Pou6f1	607.75	8.57	4.77	Ensembl	5301	chr15:100575318-100592037-	exon sense-overlapping	ENSMUST00000058274	Pou6f1	chr15:100578247-100595034-
chr9	66545497	66545825	MACS_peak_192132	603.22	328	ENSMUST00000124519	Usp3	603.22	23.45	6.12	Ensembl	664	chr9:66545462-66566926-	exon sense-overlapping	ENSMUST00000098613	Usp3	chr9:66517227-66593036-
chr4	134934455	134935049	MACS_peak_137183	601.71	594	ENSMUST00000156334	Syf2	601.71	7.89	4.82	Ensembl	816	chr4:134930902-134935049+	exon sense-overlapping	ENSMUST00000030622	Syf2	chr4:134930898-134937548+
chr11	114065802	114067046	MACS_peak_35524	599.97	1244	ENSMUST00000155651	Sdk2	599.97	7.18	4.83	Ensembl	4155	chr11:113865600-114067046-	exon sense-overlapping	ENSMUST00000041627	Sdk2	chr11:113776374-114066218-
chr19	6907241	6908116	MACS_peak_95273	596.29	875	ENSMUST00000145300	Prdx5	596.29	10	4.86	Ensembl	1826	chr19:6906697-6909978-	exon sense-overlapping	ENSMUST00000025904	Prdx5	chr19:6906706-6910106-
chr2	156017796	156018279	MACS_peak_111291	593.83	483	ENSMUST00000137545	Ergic3	593.83	8.73	6.12	Ensembl	654	chr2:156017546-156018279+	exon sense-overlapping	ENSMUST00000006035	Ergic3	chr2:156008045-156018279+
chr11	118264697	118265534	MACS_peak_36225	592.84	837	ENSMUST00000141647	Usp36	592.84	12.43	4.87	Ensembl	3815	chr11:118259654-118266048-	exon sense-overlapping	ENSMUST00000092382	Usp36	chr11:118259653-118290244-
chr7	4742453	4743110	MACS_peak_163131	589.29	657	ENSMUST00000152500	Suv420h2	589.29	15.06	6.18	Ensembl	892	chr7:4742454-4743481+	exon sense-overlapping	ENSMUST00000098853	Suv420h2	chr7:4740115-4747514+
chr3	95004311	95006332	MACS_peak_119751	587.28	2021	uc033hww.1	BC052761	587.28	19.43	6.15	UCSC_knowngene	2439	chr3:95004012-95006450-	natural antisense	ENSMUST00000072287	Pi4kb	chr3:94974731-95006843+
chr16	20681182	20681733	MACS_peak_73486	586.15	551	ENSMUST00000137690	Eif4g1	586.15	4.36	4.84	Ensembl	589	chr16:20681039-20681733+	exon sense-overlapping	ENSMUST00000044783	Eif4g1	chr16:20672723-20692884+
chr2	166995544	166996239	MACS_peak_114731	583.93	695	uc008nyz.1	AK041781	583.93	16.61	4.85	UCSC_knowngene	3594	chr2:166992646-166996239-	exon sense-overlapping	ENSMUST00000049412	Stau1	chr2:166948147-166996103-
chr7	119739925	119740542	MACS_peak_172590	579.49	617	ENSMUST00000004569	Gm5601	579.49	13.44	6.18	Ensembl	1437	chr7:119739926-119742226+	intergenic	NA	NA	NA
chr4	21847928	21848338	MACS_peak_127604	575.37	410	NR_028384	4930528A17Rik	575.37	9.96	4.85	RefSeq	2122	chr4:21846327-21848448-	natural antisense	ENSMUST00000029911	Sfrs18	chr4:21847583-21876475+
chr2	91261048	91261406	MACS_peak_105663	573.37	358	ENSMUST00000126754	Pacsin3	573.37	14.01	6.27	Ensembl	761	chr2:91260805-91261669+	exon sense-overlapping	ENSMUST00000028694	Pacsin3	chr2:91256813-91264678+
chr7	5059495	5060785	MACS_peak_163195	571.78	1290	ENSMUST00000149912	Ccdc106	571.78	16.96	6.27	Ensembl	2492	chr7:5056740-5060785+	exon sense-overlapping	ENSMUST00000045543	Ccdc106	chr7:5057197-5060785+
chr17	70996109	70996895	MACS_peak_85617	571.22	786	ENSMUST00000126529	Myl12a	571.22	7.08	4.81	Ensembl	1335	chr17:70994294-71002165-	exon sense-overlapping	ENSMUST00000024846	Myl12a	chr17:70994294-70998012-
chr17	46247400	46247800	MACS_peak_83522	570.81	400	ENSMUST00000124126	Polr1c	570.81	10.03	4.81	Ensembl	576	chr17:46247299-46247968-	exon sense-overlapping	ENSMUST00000087026	Polr1c	chr17:46243920-46248054-
chr11	96822408	96822719	MACS_peak_33013	570.48	311	ENSMUST00000134951	Nfe2l1	570.48	11.32	4.81	Ensembl	597	chr11:96821346-96822725-	exon sense-overlapping	ENSMUST00000081775	Nfe2l1	chr11:96817414-96829968-
chr7	80391727	80393621	MACS_peak_172204	568.78	1894	ENSMUST00000146771	Furin	568.78	10.36	4.79	Ensembl	5736	chr7:80388585-80396353-	exon sense-overlapping	ENSMUST00000107362	Furin	chr7:80389194-80405431-
chr7	27258805	27259159	MACS_peak_167676	568.01	354	ENSMUST00000149805	Numbl	568.01	8.86	4.78	Ensembl	8511	chr7:27258806-27282144+	exon sense-overlapping	ENSMUST00000079258	Numbl	chr7:27258725-27282141+
chr1	63445890	63446412	MACS_peak_4034	567.22	522	ENSMUST00000114103	Adam23	567.22	19.88	4.78	Ensembl	2889	chr1:63445891-63573217+	exon sense-overlapping	ENSMUST00000087374	Adam23	chr1:63445895-63596276+
chr8	85554728	85555368	MACS_peak_181729	564.79	640	uc009mqb.1	AK163592	564.79	12.35	6.27	UCSC_knowngene	1168	chr8:85554201-85555368-	exon sense-overlapping	ENSMUST00000034138	Dnaja2	chr8:85537640-85555271-
chr4	78211589	78211961	MACS_peak_131429	559.82	372	ENSMUST00000140422	Ptprd	559.82	10.61	4.82	Ensembl	2124	chr4:77351290-78211961-	exon sense-overlapping	NM_011211	Ptprd	chr4:75941237-78211895-
chr12	110657042	110657343	MACS_peak_45614	559.41	301	ENSMUST00000166185	Dync1h1	559.41	7.71	4.82	Ensembl	522	chr12:110656405-110657343+	exon sense-overlapping	ENSMUST00000018851	Dync1h1	chr12:110601452-110666945+
chr4	141019707	141020489	MACS_peak_135443	557.72	782	ENSMUST00000122846	Crocc	557.72	17.69	6.25	Ensembl	2186	chr4:141016637-141022124-	exon sense-overlapping	ENSMUST00000040222	Crocc	chr4:141016640-141053661-
chr10	127578328	127578714	MACS_peak_23928	555.52	386	ENSMUST00000129877	Lrp1	555.52	7.15	4.79	Ensembl	550	chr10:127578329-127581885-	exon sense-overlapping	ENSMUST00000049149	Lrp1	chr10:127538161-127621148-
chr1	171275989	171276584	MACS_peak_11707	553.49	595	ENSMUST00000155083	Ppox	553.49	10.2	4.83	Ensembl	4411	chr1:171275990-171281186-	exon sense-overlapping	ENSMUST00000073120	Ppox	chr1:171276992-171281186-
chr7	3655570	3656156	MACS_peak_166205	553.43	586	ENSMUST00000143085	Cnot3	553.43	12.07	4.83	Ensembl	2963	chr7:3645290-3661108+	exon sense-overlapping	ENSMUST00000038913	Cnot3	chr7:3645352-3661100+
chr3	108079253	108079773	MACS_peak_121080	549.7	520	ENSMUST00000133129	Ampd2	549.7	10.68	6.31	Ensembl	1321	chr3:108078632-108080618-	exon sense-overlapping	ENSMUST00000078912	Ampd2	chr3:108074087-108085399-
chrX	7810252	7810848	MACS_peak_202143	546.05	596	ENSMUST00000135622	Gripap1	546.05	9.14	4.87	Ensembl	2252	chrX:7798447-7810848+	exon sense-overlapping	ENSMUST00000065932	Gripap1	chrX:7789765-7820567+
chr9	21281041	21282228	MACS_peak_187064	541.05	1187	ENSMUST00000183912	Kri1	541.05	9.86	6.33	Ensembl	2509	chr9:21278953-21287969-	exon sense-overlapping	ENSMUST00000038671	Kri1	chr9:21273457-21287969-
chr4	135329168	135329517	MACS_peak_137211	539.36	349	ENSMUST00000162914	Srrm1	539.36	11.65	4.83	Ensembl	512	chr4:135329169-135332233-	exon sense-overlapping	ENSMUST00000030613	Srrm1	chr4:135322033-135353136-
chr4	141006042	141006848	MACS_peak_138169	538.94	806	ENSMUST00000151517	Atp13a2	538.94	8.51	4.82	Ensembl	4266	chr4:140986900-141007330+	exon sense-overlapping	ENSMUST00000037055	Atp13a2	chr4:140986873-141007330+
chr4	141464236	141464702	MACS_peak_138267	536.04	466	ENSMUST00000142020	Zbtb17	536.04	11.61	4.82	Ensembl	2973	chr4:141444699-141467225+	exon sense-overlapping	ENSMUST00000006377	Zbtb17	chr4:141444654-141467225+
chr11	102399614	102400045	MACS_peak_33895	534.52	431	ENSMUST00000146330	Rundc3a	534.52	8.73	4.8	Ensembl	1878	chr11:102397864-102402555+	exon sense-overlapping	ENSMUST00000006750	Rundc3a	chr11:102393403-102402555+
chr11	77973782	77974636	MACS_peak_30876	533.02	854	ENSMUST00000142542	Sez6	533.02	11.26	4.84	Ensembl	4523	chr11:77930839-77979048+	exon sense-overlapping	ENSMUST00000000646	Sez6	chr11:77931012-77979040+
chr11	94634911	94635215	MACS_peak_32541	531.55	304	ENSMUST00000138782	Lrrc59	531.55	6.47	6.29	Ensembl	856	chr11:94629814-94635252+	exon sense-overlapping	ENSMUST00000021239	Lrrc59	chr11:94629767-94645216+
chr2	155278242	155279008	MACS_peak_112954	526.86	766	ENSMUST00000139854	Pigu	526.86	9.58	4.78	Ensembl	5497	chr2:155278243-155301302-	exon sense-overlapping	ENSMUST00000077626	Pigu	chr2:155278243-155357430-
chr11	115534378	115534683	MACS_peak_35147	521.18	305	ENSMUST00000050672	Sumo2	521.18	6.12	6.39	Ensembl	397	chr11:115534379-115536189-	exon sense-overlapping	ENSMUST00000117589	Sumo2	chr11:115523102-115535817-
chr10	76531681	76532018	MACS_peak_19348	519.4	337	ENSMUST00000159172	Lss	519.4	19.09	6.41	Ensembl	641	chr10:76531682-76535723+	exon sense-overlapping	ENSMUST00000048678	Lss	chr10:76531607-76555479+
chr9	61402460	61403066	MACS_peak_195788	519.34	606	ENSMUST00000159140	Tle3	519.34	14.28	4.74	Ensembl	8638	chr9:61402461-61417835+	exon sense-overlapping	ENSMUST00000034820	Tle3	chr9:61372858-61418487+
chr15	83117377	83117747	MACS_peak_68630	519.12	370	ENSMUST00000167589	Rrp7a	519.12	5.74	4.74	Ensembl	792	chr15:83117226-83118346-	exon sense-overlapping	ENSMUST00000018184	Rrp7a	chr15:83113433-83122801-
chr19	4011101	4011428	MACS_peak_94676	518.36	327	ENSMUST00000150852	Ndufv1	518.36	7.48	4.76	Ensembl	909	chr19:4008753-4012704-	exon sense-overlapping	ENSMUST00000042497	Ndufv1	chr19:4007497-4012806-
chr13	101038598	101038998	MACS_peak_52138	517.64	400	ENSMUST00000179479	Hmgb1-ps9	517.64	6.6	6.41	Ensembl	648	chr13:101038599-101039246-	intergenic	NA	NA	NA
chr5	110430404	110431955	MACS_peak_148648	517.55	1551	NR_105032	Gm29766	517.55	9.71	4.75	RefSeq	2081	chr5:110429875-110431955-	intron sense-overlapping	ENSMUST00000069483	Fbrsl1	chr5:110361754-110448503-
chr5	138504711	138505564	MACS_peak_153127	516.45	853	ENSMUST00000034916	Gm5564	516.45	39.07	4.74	Ensembl	1240	chr5:138504712-138505951+	intergenic	NA	NA	NA
chr7	25228722	25230264	MACS_peak_167472	516.37	1542	NR_046001	9130221H12Rik	516.37	7.28	4.74	RefSeq	1542	chr7:25228723-25230264+	exon sense-overlapping	ENSMUST00000169914	9130221H12Rik	chr7:25228687-25230257+
chr10	77592566	77593017	MACS_peak_19513	516.37	451	ENSMUST00000167006	Pttg1ip	516.37	9.34	6.4	Ensembl	831	chr10:77592337-77597130+	exon sense-overlapping	ENSMUST00000009435	Pttg1ip	chr10:77581720-77598732+
chr15	102710224	102710530	MACS_peak_71126	516.11	306	ENSMUST00000166943	Calcoco1	516.11	8.36	4.74	Ensembl	863	chr15:102710225-102715796-	exon sense-overlapping	ENSMUST00000023818	Calcoco1	chr15:102706779-102722178-
chr7	5089837	5090168	MACS_peak_150474	513.48	331	ENSMUST00000155436	Epn1	513.48	5.21	9.62	Ensembl	456	chr7:5089838-5092965+	exon sense-overlapping	ENSMUST00000045277	Epn1	chr7:5080293-5098176+
chr3	88484046	88484607	MACS_peak_109626	513.24	561	ENSMUST00000147537	Lmna	513.24	8.58	9.62	Ensembl	889	chr3:88483206-88484607-	exon sense-overlapping	ENSMUST00000029699	Lmna	chr3:88481148-88503335-
chrX	94615799	94616125	MACS_peak_200309	512.68	326	ENSMUST00000117321	Gm9009	512.68	31.87	6.39	Ensembl	326	chrX:94615800-94616125+	intergenic	NA	NA	NA
chr18	65582417	65582809	MACS_peak_90958	511.85	392	ENSMUST00000182478	Zfp532	511.85	11.13	6.41	Ensembl	5471	chr18:65582418-65688941+	exon sense-overlapping	ENSMUST00000049016	Zfp532	chr18:65580230-65689443+
chr19	3595599	3596541	MACS_peak_93036	510.46	942	ENSMUST00000177330	Lrp5	510.46	23.78	6.47	Ensembl	8893	chr19:3584831-3686561-	exon sense-overlapping	ENSMUST00000025856	Lrp5	chr19:3584828-3686556-
chr3	89340415	89340919	MACS_peak_109818	509.57	504	ENSMUST00000155868	Adam15	509.57	6.97	9.67	Ensembl	668	chr3:89339915-89340919-	exon sense-overlapping	ENSMUST00000029676	Adam15	chr3:89339640-89349996-
chr16	14170337	14170654	MACS_peak_72745	508.46	317	ENSMUST00000133249	Nde1	508.46	10.14	4.74	Ensembl	681	chr16:14163304-14170829+	exon sense-overlapping	ENSMUST00000023359	Nde1	chr16:14163275-14192928+
chr17	45568857	45569387	MACS_peak_75663	507.17	530	ENSMUST00000145205	Hsp90ab1	507.17	10.39	9.66	Ensembl	797	chr17:45568858-45569736-	exon sense-overlapping	ENSMUST00000024739	Hsp90ab1	chr17:45567775-45573271-
chr3	85971108	85971424	MACS_peak_109281	505.45	316	ENSMUST00000182969	Sh3d19	505.45	8.79	9.7	Ensembl	616	chr3:85971109-86083538+	exon sense-overlapping	ENSMUST00000182666	Sh3d19	chr3:86070915-86130526+
chr11	120718441	120719132	MACS_peak_36894	504.74	691	ENSMUST00000150225	Lrrc45	504.74	6.99	4.73	Ensembl	1139	chr11:120717515-120719972+	exon sense-overlapping	ENSMUST00000026139	Lrrc45	chr11:120713925-120721128+
chr2	18179028	18179442	MACS_peak_101395	504.49	414	ENSMUST00000118087	Gm13351	504.49	14.95	4.73	Ensembl	414	chr2:18179029-18179442-	intronic antisense	ENSMUST00000028076	Mllt10	chr2:18055237-18212387+
chr7	44849343	44850006	MACS_peak_165788	499.47	663	ENSMUST00000152091	Akt1s1	499.47	12.92	6.65	Ensembl	2207	chr7:44849344-44855417+	exon sense-overlapping	ENSMUST00000054343	Akt1s1	chr7:44849224-44855421+
chr16	4875366	4876606	MACS_peak_71500	496.41	1240	ENSMUST00000143873	Ubald1	496.41	6.19	4.81	Ensembl	4749	chr16:4874788-4879805-	exon sense-overlapping	ENSMUST00000037843	Ubald1	chr16:4874778-4880315-
chr5	34601323	34601625	MACS_peak_143404	496.34	302	ENSMUST00000145986	Add1	496.34	8.82	4.81	Ensembl	412	chr5:34573804-34601625+	exon sense-overlapping	ENSMUST00000001108	Add1	chr5:34573863-34632305+
chr14	69703756	69704126	MACS_peak_59848	496.09	370	ENSMUST00000128747	R3hcc1	496.09	16.22	4.83	Ensembl	829	chr14:69703478-69705313-	exon sense-overlapping	ENSMUST00000118374	R3hcc1	chr14:69697307-69707584-
chr5	24429216	24429578	MACS_peak_142033	494.22	362	ENSMUST00000155636	Slc4a2	494.22	9	4.8	Ensembl	637	chr5:24429018-24429779+	exon sense-overlapping	ENSMUST00000080067	Slc4a2	chr5:24425232-24440950+
chr19	46056831	46057160	MACS_peak_96835	494.01	329	ENSMUST00000128386	Pprc1	494.01	18.88	6.74	Ensembl	385	chr19:46056832-46061458+	exon sense-overlapping	ENSMUST00000062322	Pprc1	chr19:46056584-46072909+
chr5	115348564	115348914	MACS_peak_149565	493.31	350	ENSMUST00000137766	Cox6a1	493.31	5.17	4.79	Ensembl	620	chr5:115345657-115348914-	exon sense-overlapping	ENSMUST00000040154	Cox6a1	chr5:115345642-115348981-
chr3	90087673	90089596	MACS_peak_109943	490.52	1923	ENSMUST00000131354	Tpm3	490.52	7.68	9.77	Ensembl	2374	chr3:90079665-90089596+	exon sense-overlapping	ENSMUST00000029549	Tpm3	chr3:90079540-90100901+
chr17	6121207	6122164	MACS_peak_72290	490.36	957	ENSMUST00000061073	Gm5812	490.36	7.83	9.76	Ensembl	957	chr17:6121208-6122164-	intronic antisense	ENSMUST00000142030	Tulp4	chr17:6106479-6206914+
chr1	37299892	37300284	MACS_peak_2086	489.85	392	uc007arj.1	AK051424	489.85	11.41	4.76	UCSC_knowngene	2910	chr1:37299893-37302802+	exon sense-overlapping	ENSMUST00000027287	Inpp4a	chr1:37299893-37410736+
chr16	84834275	84834983	MACS_peak_77918	485.4	708	ENSMUST00000148787	Atp5j	485.4	9.71	4.76	Ensembl	817	chr16:84834276-84835529-	exon sense-overlapping	ENSMUST00000023608	Atp5j	chr16:84827871-84835625-
chr11	6006287	6008328	MACS_peak_24668	484.46	2041	uc007hxv.1	BC019819	484.46	7.75	4.74	UCSC_knowngene	2041	chr11:6006288-6008328+	intronic antisense	ENSMUST00000002817	Camk2b	chr11:5971672-6065742-
chr10	116473162	116474387	MACS_peak_22747	481.29	1225	NR_130644	Kcnmb4os2	481.29	13.88	4.72	RefSeq	1615	chr10:116473163-116474986+	natural antisense	ENSMUST00000068233	Kcnmb4	chr10:116417861-116473878-
chr6	86395913	86396358	MACS_peak_160638	481.17	445	ENSMUST00000129650	Pcyox1	481.17	7.32	4.71	Ensembl	779	chr6:86394518-86396626-	exon sense-overlapping	ENSMUST00000032065	Pcyox1	chr6:86386006-86397150-
chr5	33651624	33652079	MACS_peak_140477	480.86	455	ENSMUST00000126581	Slbp	480.86	12.27	6.91	Ensembl	562	chr5:33651625-33652301-	exon sense-overlapping	ENSMUST00000057551	Slbp	chr5:33640055-33652574-
chr4	24898130	24898631	MACS_peak_125461	480.5	501	ENSMUST00000146721	Ndufaf4	480.5	11.57	6.91	Ensembl	2358	chr4:24898131-24903505+	exon sense-overlapping	ENSMUST00000029925	Ndufaf4	chr4:24898083-24905001+
chr7	93179049	93179669	MACS_peak_173350	479.56	620	ENSMUST00000133910	Gm15501	479.56	6.13	4.75	Ensembl	687	chr7:93178983-93179669-	intergenic	NA	NA	NA
chr7	141442150	141443119	MACS_peak_178288	479.49	969	ENSMUST00000138065	Lrdd	479.49	24.05	4.74	Ensembl	3699	chr7:141438125-141443356-	exon sense-overlapping	ENSMUST00000026580	Lrdd	chr7:141438113-141444025-
chr11	98438036	98438716	MACS_peak_33377	478.66	680	ENSMUST00000154452	Gm12352	478.66	9.46	4.76	Ensembl	760	chr11:98438037-98439046+	natural antisense	ENSMUST00000002655	Mien1	chr11:98437708-98438991-
chr11	70981988	70983007	MACS_peak_29735	478.65	1019	ENSMUST00000179291	C1qbp	478.65	7.05	6.91	Ensembl	1998	chr11:70981010-70983007-	exon sense-overlapping	ENSMUST00000078528	C1qbp	chr11:70977836-70983026-
chr3	88775238	88775731	MACS_peak_121389	477.92	493	uc008pwo.1	5830417I10Rik	477.92	14.44	4.78	UCSC_knowngene	1410	chr3:88775239-88854795+	exon sense-overlapping	ENSMUST00000081695	Gon4l	chr3:88837016-88910098+
chr13	54765365	54765692	MACS_peak_50073	476.69	327	ENSMUST00000138067	Sncb	476.69	9.71	4.77	Ensembl	822	chr13:54765059-54766492-	exon sense-overlapping	ENSMUST00000036825	Sncb	chr13:54758860-54766595-
chr2	25585188	25585536	MACS_peak_92363	476.24	348	ENSMUST00000135084	Rabl6	476.24	9.66	9.77	Ensembl	548	chr2:25585189-25585823-	exon sense-overlapping	ENSMUST00000058137	Rabl6	chr2:25583018-25608521-
chr17	34030565	34031648	MACS_peak_82829	475.42	1083	ENSMUST00000170491	Slc39a7	475.42	15.26	4.78	Ensembl	2433	chr17:34028273-34031648-	exon sense-overlapping	ENSMUST00000025186	Slc39a7	chr17:34028269-34031544-
chr4	133695571	133696156	MACS_peak_136959	475.15	585	ENSMUST00000138473	Arid1a	475.15	6.24	4.78	Ensembl	3964	chr4:133689487-133753982-	exon sense-overlapping	ENSMUST00000008024	Arid1a	chr4:133679941-133756769-
chr10	128776741	128777251	MACS_peak_22180	474.27	510	ENSMUST00000059546	Rpsa-ps2	474.27	11.69	9.85	Ensembl	510	chr10:128776742-128777251-	intergenic	NA	NA	NA
chr4	132509872	132510499	MACS_peak_123332	471.77	627	uc008vbk.1	AK155592	471.77	7.86	9.86	UCSC_knowngene	4424	chr4:132506076-132510499-	exon sense-overlapping	ENSMUST00000030724	Sesn2	chr4:132492032-132510501-
chr5	124450463	124450880	MACS_peak_151106	470.41	417	ENSMUST00000135667	Setd8	470.41	8.66	4.76	Ensembl	754	chr5:124450402-124459901+	exon sense-overlapping	ENSMUST00000059580	Setd8	chr5:124439930-124462308+
chr1	92641606	92641948	MACS_peak_6556	467.38	342	NR_028108	Myeov2	467.38	20.09	6.96	RefSeq	760	chr1:92637145-92641948-	exon sense-overlapping	ENSMUST00000097642	Myeov2	chr1:92637145-92641985-
chr15	79420817	79421315	MACS_peak_67940	466.56	498	ENSMUST00000127155	Csnk1e	466.56	9.67	4.81	Ensembl	741	chr15:79419149-79421315-	exon sense-overlapping	ENSMUST00000117786	Csnk1e	chr15:79417856-79441999-
chr12	17881905	17882322	MACS_peak_38066	464.76	417	uc007ncz.1	BC031503	464.76	13.55	4.82	UCSC_knowngene	1939	chr12:17881906-17939632+	intron sense-overlapping	ENSMUST00000169657	B430203G13Rik	chr12:17924294-17925668+
chr18	73863630	73864251	MACS_peak_91646	464.27	621	ENSMUST00000139821	Mro	464.27	11.45	7.04	Ensembl	1877	chr18:73863631-73870209+	exon sense-overlapping	ENSMUST00000119239	Mro	chr18:73859402-73878730+
chr6	117997206	117997984	MACS_peak_160284	464.18	778	ENSMUST00000118257	Gm4875	464.18	32.88	7.04	Ensembl	786	chr6:117997207-117997992+	intergenic	NA	NA	NA
chr4	130021114	130021661	MACS_peak_133768	462.79	547	ENSMUST00000136787	Bai2	462.79	11.74	7.02	Ensembl	828	chr4:130021115-130022430+	exon sense-overlapping	ENSMUST00000030571	Bai2	chr4:129992069-130022338+
chr15	79833244	79833578	MACS_peak_67021	461.33	334	ENSMUST00000129614	Cbx6	461.33	8.65	7.04	Ensembl	576	chr15:79833245-79834274-	exon sense-overlapping	ENSMUST00000023060	Npcd	chr15:79789675-79834237-
chr13	69809913	69810371	MACS_peak_51261	460.85	458	ENSMUST00000180656	Gm26819	460.85	9.8	4.83	Ensembl	5128	chr13:69809914-69816094-	natural antisense	ENSMUST00000022089	Med10	chr13:69809882-69816094+
chr4	107846200	107846619	MACS_peak_133735	460.74	419	ENSMUST00000135591	Lrp8	460.74	11.29	4.85	Ensembl	557	chr4:107846201-107848295+	exon sense-overlapping	ENSMUST00000030356	Lrp8	chr4:107802314-107873899+
chr5	23432362	23434353	MACS_peak_139057	460.72	1991	NR_040469	5031425E22Rik	460.72	9.66	7.03	RefSeq	2546	chr5:23431808-23434353-	exon sense-overlapping	ENSMUST00000101522	5031425E22Rik	chr5:23431810-23433919-
chr13	51202632	51203066	MACS_peak_48910	460.13	434	uc029sbd.1	H2A	460.13	11.8	7.07	UCSC_knowngene	434	chr13:51202633-51203066-	exon sense-overlapping	ENSMUST00000091708	Hist1h2al	chr13:51202688-51203065-
chrX	13218014	13218650	MACS_peak_182920	458.61	636	ENSMUST00000165597	Llph-ps2	458.61	18.04	9.97	Ensembl	728	chrX:13217923-13218650-	intergenic	NA	NA	NA
chr14	20702621	20703099	MACS_peak_54657	456.65	478	NR_029446	6230400D17Rik	456.65	11.5	7.1	RefSeq	1088	chr14:20702012-20703099-	natural antisense	ENSMUST00000071215	Chchd1	chr14:20703027-20704417+
chr17	24454864	24455343	MACS_peak_80005	455.85	479	uc008awc.1	BC026600	455.85	18.95	7.16	UCSC_knowngene	2237	chr17:24454865-24457101+	natural antisense	ENSMUST00000056032	E4f1	chr17:24443792-24455311-
chr12	72223232	72223539	MACS_peak_37510	455.5	307	ENSMUST00000144181	Rtn1	455.5	4.99	9.92	Ensembl	465	chr12:72223233-72236686-	exon sense-overlapping	ENSMUST00000021497	Rtn1	chr12:72211753-72236724-
chr16	91928699	91929009	MACS_peak_78583	453.89	310	ENSMUST00000132049	Atp5o	453.89	6.26	4.94	Ensembl	932	chr16:91928161-91931551-	exon sense-overlapping	ENSMUST00000023677	Atp5o	chr16:91925214-91931687-
chr14	52204432	52205506	MACS_peak_58284	453.84	1074	ENSMUST00000134329	Chd8	453.84	10.79	4.94	Ensembl	2444	chr14:52203725-52207556-	exon sense-overlapping	ENSMUST00000089752	Chd8	chr14:52198151-52237572-
chr16	31991252	31991868	MACS_peak_73108	453.63	616	ENSMUST00000119503	Hmgb1-ps6	453.63	10.72	7.18	Ensembl	616	chr16:31991253-31991868-	intron sense-overlapping	ENSMUST00000023457	Senp5	chr16:31962506-32003287-
chr16	35647043	35648102	MACS_peak_75027	452.98	1059	ENSMUST00000133554	Sema5b	452.98	8.29	5	Ensembl	2928	chr16:35541145-35648140+	exon sense-overlapping	ENSMUST00000050625	Sema5b	chr16:35541571-35664261+
chr18	23804024	23804550	MACS_peak_88807	449.52	526	uc008egg.1	AK088734	449.52	7.45	4.98	UCSC_knowngene	2035	chr18:23804025-23806059+	exon sense-overlapping	ENSMUST00000025127	Mapre2	chr18:23803984-23893857+
chr10	37137781	37138924	MACS_peak_16162	449.11	1143	uc007evh.2	AK017779	449.11	6.14	4.97	UCSC_knowngene	1400	chr10:37137525-37138924-	exon sense-overlapping	ENSMUST00000092584	Marcks	chr10:37133375-37138920-
chr10	8885637	8886207	MACS_peak_14284	448.26	570	ENSMUST00000180770	Gm26674	448.26	15.35	4.96	Ensembl	1491	chr10:8884594-8886880+	natural antisense	ENSMUST00000015449	Sash1	chr10:8722219-8886070-
chr4	43669555	43670034	MACS_peak_129018	447.75	479	ENSMUST00000134869	Tmem8b	447.75	13.86	5	Ensembl	1243	chr4:43669556-43686413+	exon sense-overlapping	ENSMUST00000107864	Tmem8b	chr4:43669287-43692668+
chr11	61492903	61494266	MACS_peak_28845	445.46	1363	ENSMUST00000128478	Mapk7	445.46	8.36	5.03	Ensembl	4238	chr11:61488812-61494266-	exon sense-overlapping	ENSMUST00000079080	Mapk7	chr11:61488812-61494296-
chr7	36118273	36118828	MACS_peak_165410	444.01	555	ENSMUST00000119541	Gm10166	444.01	7.7	7.29	Ensembl	555	chr7:36118274-36118828+	intergenic	NA	NA	NA
chr7	25715734	25716367	MACS_peak_167585	443.45	633	ENSMUST00000129519	Ccdc97	443.45	10.55	5.02	Ensembl	771	chr7:25714910-25716394-	exon sense-overlapping	ENSMUST00000002683	Ccdc97	chr7:25711106-25719088-
chr2	35978730	35979540	MACS_peak_102144	443.37	810	uc008jla.1	DQ699740	443.37	14.82	7.32	UCSC_knowngene	2098	chr2:35977443-35979540-	exon sense-overlapping	ENSMUST00000028248	Ttll11	chr2:35751241-35979624-
chr2	90917609	90918102	MACS_peak_107321	443.21	493	ENSMUST00000111461	Ptpmt1	443.21	14	5.02	Ensembl	1529	chr2:90910713-90918258-	exon sense-overlapping	NM_025576	Ptpmt1	chr2:90910713-90918050-
chr7	122067663	122068163	MACS_peak_176369	442.94	500	ENSMUST00000148060	Ubfd1	442.94	9.49	5.01	Ensembl	3300	chr7:122067208-122077632+	exon sense-overlapping	ENSMUST00000033158	Ubfd1	chr7:122067175-122082194+
chr10	128563151	128563705	MACS_peak_24092	440.25	554	ENSMUST00000147068	Pa2g4	440.25	11.72	5.07	Ensembl	684	chr10:128563152-128565869-	exon sense-overlapping	ENSMUST00000026425	Pa2g4	chr10:128557766-128565934-
chr5	30871419	30871855	MACS_peak_140079	438.94	436	ENSMUST00000150310	Tmem214	438.94	17.89	7.37	Ensembl	3746	chr5:30869635-30877468+	exon sense-overlapping	ENSMUST00000046349	Tmem214	chr5:30869579-30879191+
chr8	52196430	52197160	MACS_peak_165338	437.67	730	ENSMUST00000064897	Gm9892	437.67	10.97	9.94	Ensembl	1381	chr8:52195780-52197160-	intergenic	NA	NA	NA
chr4	32762964	32763352	MACS_peak_128040	437.23	388	ENSMUST00000124361	Mdn1	437.23	12.73	5.04	Ensembl	597	chr4:32762865-32765217+	exon sense-overlapping	ENSMUST00000071642	Mdn1	chr4:32657119-32775207+
chr18	35610297	35611034	MACS_peak_89798	436.78	737	ENSMUST00000151126	Paip2	436.78	9.96	5.05	Ensembl	854	chr18:35610284-35613425+	exon sense-overlapping	ENSMUST00000041314	Paip2	chr18:35598617-35617186+
chr1	161250756	161251166	MACS_peak_10855	435.7	410	ENSMUST00000155135	Prdx6	435.7	7.72	7.44	Ensembl	825	chr1:161243611-161251166-	exon sense-overlapping	ENSMUST00000051925	Prdx6	chr1:161241598-161251166-
chr11	69903007	69903719	MACS_peak_29799	434.93	712	ENSMUST00000177160	Neurl4	434.93	6.79	5.09	Ensembl	1438	chr11:69902027-69905597+	exon sense-overlapping	ENSMUST00000061837	Neurl4	chr11:69901891-69913820+
chrX	21360939	21363022	MACS_peak_202761	432.75	2083	ENSMUST00000132683	Gm5124	432.75	5.57	5.08	Ensembl	2083	chrX:21360940-21363022+	intergenic	NA	NA	NA
chr7	141191341	141192290	MACS_peak_174627	432.05	949	ENSMUST00000128993	Hras	432.05	8.99	7.51	Ensembl	1704	chr7:141190926-141193994-	exon sense-overlapping	ENSMUST00000026572	Hras	chr7:141189105-141193960-
chr5	104498446	104499532	MACS_peak_145180	431.97	1086	ENSMUST00000133540	Pkd2	431.97	8.29	7.5	Ensembl	5130	chr5:104492771-104501349+	exon sense-overlapping	ENSMUST00000086831	Pkd2	chr5:104459450-104505819+
chr10	7780184	7780965	MACS_peak_14158	429.3	781	ENSMUST00000180853	B430219N15Rik	429.3	18.14	5.13	Ensembl	1105	chr10:7780185-7781289+	natural antisense	ENSMUST00000039763	Ginm1	chr10:7767947-7780917-
chr4	141546161	141546774	MACS_peak_124740	429.04	613	NR_030695	B330016D10Rik	429.04	32.6	9.84	RefSeq	2152	chr4:141546162-141548313+	intergenic	NA	NA	NA
chr1	143683229	143683609	MACS_peak_9483	429.03	380	ENSMUST00000161973	Gm6397	429.03	28.33	7.46	Ensembl	1069	chr1:143683230-143684298+	intronic antisense	ENSMUST00000018337	Cdc73	chr1:143598797-143702893-
chr18	60815996	60816528	MACS_peak_90482	424.39	532	ENSMUST00000163446	Tcof1	424.39	6.77	7.47	Ensembl	4064	chr18:60815997-60848959-	exon sense-overlapping	ENSMUST00000175934	Tcof1	chr18:60813755-60848929-
chr13	48261830	48262591	MACS_peak_49428	424.17	761	uc007qic.1	AK039372	424.17	5.89	5.14	UCSC_knowngene	2312	chr13:48239054-48262591-	natural antisense	ENSMUST00000021810	Id4	chr13:48261427-48264036+
chr11	120595615	120596067	MACS_peak_36859	423.31	452	ENSMUST00000156685	Alyref	423.31	8.23	5.17	Ensembl	711	chr11:120595616-120598231-	exon sense-overlapping	ENSMUST00000026125	Alyref	chr11:120592121-120598365-
chr7	29167078	29167973	MACS_peak_168044	421.47	895	ENSMUST00000130390	Spred3	421.47	14.81	5.22	Ensembl	2368	chr7:29165923-29169841-	exon sense-overlapping	ENSMUST00000048923	Spred3	chr7:29158829-29168647-
chr6	135021176	135021578	MACS_peak_161726	418.64	402	ENSMUST00000155277	Ddx47	418.64	18.11	7.46	Ensembl	4006	chr6:135011632-135023772+	exon sense-overlapping	ENSMUST00000032326	Ddx47	chr6:135011612-135023776+
chr1	56971468	56973049	MACS_peak_3488	418.04	1581	NR_024325	9130024F11Rik	418.04	8.58	7.45	RefSeq	3728	chr1:56971469-56975196+	natural antisense	ENSMUST00000042857	Satb2	chr1:56793989-56972502-
chr2	155236607	155236940	MACS_peak_111132	417.66	333	NR_111890	Dynlrb1	417.66	12.02	7.49	RefSeq	950	chr2:155236608-155250277+	exon sense-overlapping	ENSMUST00000109682	Dynlrb1	chr2:155236535-155250277+
chr2	117257633	117257967	MACS_peak_98952	415.99	334	ENSMUST00000140936	Fam98b	415.99	8.88	10.09	Ensembl	1979	chr2:117249739-117260243+	exon sense-overlapping	ENSMUST00000028825	Fam98b	chr2:117249739-117271540+
chr7	143053036	143053686	MACS_peak_178452	415.82	650	NR_015529	R74862	415.82	9.38	5.19	RefSeq	2219	chr7:143032621-143053686-	natural antisense	ENSMUST00000037941	Cd81	chr7:143052739-143067934+
chr10	77981403	77981988	MACS_peak_19541	415.4	585	ENSMUST00000123999	1810043G02Rik	415.4	14.08	7.49	Ensembl	4492	chr10:77978671-77985434+	exon sense-overlapping	ENSMUST00000105397	1810043G02Rik	chr10:77978524-77985434+
chr19	46283621	46283940	MACS_peak_98605	414.95	319	ENSMUST00000175878	Gbf1	414.95	8.26	5.18	Ensembl	635	chr19:46283001-46283940+	exon sense-overlapping	ENSMUST00000026254	Gbf1	chr19:46152509-46286510+
chr12	84154894	84155232	MACS_peak_38916	412.62	338	ENSMUST00000137562	Elmsan1	412.62	8.05	10.08	Ensembl	425	chr12:84152945-84155232-	exon sense-overlapping	ENSMUST00000046266	Elmsan1	chr12:84149176-84218881-
chr11	52004264	52005071	MACS_peak_27713	410.81	807	ENSMUST00000143228	Cdkl3	410.81	14.12	5.2	Ensembl	2769	chr11:52004265-52057563+	exon sense-overlapping	ENSMUST00000063303	Cdkl3	chr11:52004221-52038165+
chr11	70437943	70438391	MACS_peak_29632	410.77	448	ENSMUST00000125441	Arrb2	410.77	13.46	7.6	Ensembl	756	chr11:70436903-70438722+	exon sense-overlapping	ENSMUST00000079056	Arrb2	chr11:70432645-70440828+
chr3	95231784	95232381	MACS_peak_110216	410.14	597	ENSMUST00000149804	Cdc42se1	410.14	5.95	10.19	Ensembl	653	chr3:95228810-95232381+	exon sense-overlapping	ENSMUST00000053872	Cdc42se1	chr3:95228732-95236409+
chr5	114946290	114946616	MACS_peak_149474	409.75	326	ENSMUST00000131427	2210016L21Rik	409.75	4.89	5.18	Ensembl	923	chr5:114942210-114946846+	exon sense-overlapping	ENSMUST00000031538	2210016L21Rik	chr5:114942158-114949783+
chr14	55420268	55420626	MACS_peak_57473	409.51	358	ENSMUST00000074642	Gm8894	409.51	9.92	7.58	Ensembl	456	chr14:55420269-55420724-	intergenic	NA	NA	NA
chr17	33999099	33999474	MACS_peak_81589	408.84	375	ENSMUST00000172782	H2-K1	408.84	6.7	7.59	Ensembl	480	chr17:33997509-33999474-	exon sense-overlapping	ENSMUST00000025181	H2-K1	chr17:33996053-34000333-
chr11	43745017	43745447	MACS_peak_27068	408.83	430	ENSMUST00000147984	Ttc1	408.83	10.12	5.2	Ensembl	501	chr11:43745018-43747992-	exon sense-overlapping	ENSMUST00000048578	Ttc1	chr11:43730009-43747982-
chr2	75661670	75662033	MACS_peak_106607	407.95	363	ENSMUST00000132392	Hnrnpa3	407.95	7.29	5.23	Ensembl	596	chr2:75659280-75662033+	exon sense-overlapping	ENSMUST00000090792	Hnrnpa3	chr2:75659318-75665286+
chr1	74393277	74393901	MACS_peak_4882	405.47	624	ENSMUST00000141175	Ctdsp1	405.47	6.74	5.27	Ensembl	2957	chr1:74391795-74397282+	exon sense-overlapping	ENSMUST00000027367	Ctdsp1	chr1:74391509-74397285+
chr6	51470662	51471401	MACS_peak_158367	404.33	739	ENSMUST00000156463	Cbx3	404.33	8.94	5.27	Ensembl	1217	chr6:51470663-51475241+	exon sense-overlapping	ENSMUST00000031862	Cbx3	chr6:51470530-51483704+
chr3	95034941	95035924	MACS_peak_121964	404.03	983	ENSMUST00000140280	Psmd4	404.03	4.53	5.26	Ensembl	2120	chr3:95032705-95042548-	exon sense-overlapping	ENSMUST00000071664	Psmd4	chr3:95032697-95042552-
chr17	24413450	24414427	MACS_peak_79993	403.46	977	ENSMUST00000180721	D330041H03Rik	403.46	12.17	7.65	Ensembl	1998	chr17:24412430-24414427-	bidirectional	ENSMUST00000088512	Rnps1	chr17:24414675-24425895+
chrX	135839977	135840396	MACS_peak_201519	403.19	419	ENSMUST00000137392	Gprasp2	403.19	13.47	7.67	Ensembl	776	chrX:135839978-135841634+	exon sense-overlapping	ENSMUST00000113136	Gprasp2	chrX:135839056-135844726+
chr16	96124722	96125043	MACS_peak_78927	402.88	321	ENSMUST00000145713	Hmgn1	402.88	3.93	5.24	Ensembl	801	chr16:96122234-96125339-	exon sense-overlapping	ENSMUST00000050884	Hmgn1	chr16:96120618-96127729-
chr2	90903964	90904488	MACS_peak_107318	402.75	524	ENSMUST00000144683	Ndufs3	402.75	11.35	5.24	Ensembl	783	chr2:90903825-90904702-	exon sense-overlapping	ENSMUST00000005647	Ndufs3	chr2:90894636-90904827-
chr18	25138601	25139226	MACS_peak_88995	401.14	625	uc029tma.1	AK171952	401.14	8.7	5.26	UCSC_knowngene	3070	chr18:25136157-25139226-	exon sense-overlapping	ENSMUST00000115817	Tpgs2	chr18:25136037-25169007-
chr11	70652611	70654608	MACS_peak_29907	401.11	1997	ENSMUST00000177669	Pfn1	401.11	14.32	5.26	Ensembl	1997	chr11:70652612-70654608-	exon sense-overlapping	ENSMUST00000018437	Pfn1	chr11:70651850-70654644-
chr8	71662480	71662928	MACS_peak_184239	400.27	448	ENSMUST00000175780	Unc13a	400.27	6.74	5.27	Ensembl	2569	chr8:71660346-71668082-	exon sense-overlapping	ENSMUST00000030170	Unc13a	chr8:71624417-71671757-
chr16	42907391	42907721	MACS_peak_74587	400.11	330	ENSMUST00000131689	Zbtb20	400.11	14.29	7.69	Ensembl	425	chr16:42907392-43072468+	exon sense-overlapping	ENSMUST00000114694	Zbtb20	chr16:42907652-43642602+
chr4	132211431	132212105	MACS_peak_136631	400	674	ENSMUST00000102570	Ythdf2	400	14.03	5.26	Ensembl	2536	chr4:132186750-132212105-	exon sense-overlapping	ENSMUST00000085181	Ythdf2	chr4:132186290-132212091-
chr11	70526543	70527193	MACS_peak_29640	399.98	650	ENSMUST00000148535	Psmb6	399.98	7.68	7.69	Ensembl	966	chr11:70526110-70527193+	exon sense-overlapping	ENSMUST00000018430	Psmb6	chr11:70525386-70527649+
chr16	24393353	24393655	MACS_peak_73768	399.11	302	NR_037954	1110054M08Rik	399.11	16.3	5.27	RefSeq	876	chr16:24392556-24393655-	natural antisense	ENSMUST00000038053	Lpp	chr16:24393350-24992576+
chr9	44389230	44389805	MACS_peak_193732	398.95	575	ENSMUST00000161537	Hyou1	398.95	9.62	5.26	Ensembl	4925	chr9:44379557-44390736+	exon sense-overlapping	ENSMUST00000066601	Hyou1	chr9:44379490-44392369+
chr7	4752060	4752528	MACS_peak_150410	398.7	468	ENSMUST00000182272	Cox6b2	398.7	6.98	10.18	Ensembl	519	chr7:4751925-4752528-	exon sense-overlapping	ENSMUST00000063324	Cox6b2	chr7:4751792-4753094-
chr4	120542350	120542765	MACS_peak_134934	398.44	415	ENSMUST00000147980	Ctps	398.44	7.92	5.27	Ensembl	905	chr4:120541911-120545067-	exon sense-overlapping	ENSMUST00000030381	Ctps	chr4:120539868-120570276-
chr4	40723531	40723844	MACS_peak_116033	398.07	313	ENSMUST00000126020	Dnaja1	398.07	3.59	10.16	Ensembl	622	chr4:40723362-40724111+	exon sense-overlapping	ENSMUST00000030118	Dnaja1	chr4:40722480-40734964+
chr4	107889897	107890202	MACS_peak_131266	394.9	305	ENSMUST00000132417	0610037L13Rik	394.9	16.95	7.71	Ensembl	2795	chr4:107889898-107897118+	exon sense-overlapping	ENSMUST00000106726	0610037L13Rik	chr4:107889825-107896980+
chr5	100038719	100039664	MACS_peak_147554	394.68	945	ENSMUST00000086900	Hnrnpdl	394.68	9.88	5.26	Ensembl	2149	chr5:100034727-100039664-	exon sense-overlapping	ENSMUST00000128187	Hnrnpdl	chr5:100033577-100039222-
chr9	45890604	45890943	MACS_peak_194107	393.32	339	ENSMUST00000160469	Rnf214	393.32	5.38	5.24	Ensembl	580	chr9:45890509-45898435-	exon sense-overlapping	ENSMUST00000058720	Rnf214	chr9:45863691-45906877-
chr9	80165037	80165377	MACS_peak_178868	390.48	340	ENSMUST00000183377	Myo6	390.48	7.33	10.31	Ensembl	2991	chr9:80165038-80168028+	exon sense-overlapping	ENSMUST00000035889	Myo6	chr9:80165031-80311729+
chr11	4177547	4178225	MACS_peak_22401	389.52	678	ENSMUST00000133095	Sf3a1	389.52	10.37	10.32	Ensembl	846	chr11:4177548-4179419+	exon sense-overlapping	ENSMUST00000002198	Sf3a1	chr11:4160350-4182541+
chr13	55506305	55506752	MACS_peak_50183	389.28	447	ENSMUST00000153230	Pdlim7	389.28	14.32	5.26	Ensembl	3573	chr13:55497490-55513434-	exon sense-overlapping	ENSMUST00000046246	Pdlim7	chr13:55498416-55513446-
chrX	134585688	134586183	MACS_peak_201469	388.36	495	ENSMUST00000172023	Rpl36a	388.36	3.31	7.83	Ensembl	812	chrX:134585689-134588062+	exon sense-overlapping	ENSMUST00000113211	Rpl36a	chrX:134585654-134588056+
chr11	101301727	101302237	MACS_peak_33754	388.2	510	ENSMUST00000167667	Becn1	388.2	10.19	5.23	Ensembl	1599	chr11:101288876-101302237-	exon sense-overlapping	ENSMUST00000129863	Becn1	chr11:101290484-101301737-
chr11	6415875	6416521	MACS_peak_24749	387.5	646	ENSMUST00000155824	Ppia	387.5	6.4	5.22	Ensembl	2853	chr11:6415876-6419812+	exon sense-overlapping	ENSMUST00000132846	Ppia	chr11:6415443-6419817+
chr11	119273974	119274311	MACS_peak_33172	384.5	337	ENSMUST00000128753	Gaa	384.5	7.69	10.36	Ensembl	965	chr11:119270516-119275139+	exon sense-overlapping	ENSMUST00000026666	Gaa	chr11:119268026-119285454+
chrX	73788640	73788953	MACS_peak_204104	382.96	313	ENSMUST00000130738	Ssr4	382.96	10.86	5.23	Ensembl	2119	chrX:73787224-73790811+	exon sense-overlapping	ENSMUST00000002090	Ssr4	chrX:73787062-73790826+
chr5	129128029	129128571	MACS_peak_151575	382.49	542	ENSMUST00000076708	Rps16-ps2	382.49	11.95	5.22	Ensembl	552	chr5:129128020-129128571-	intronic antisense	ENSMUST00000056617	Gpr133	chr5:129096750-129204599+
chr17	5816294	5816700	MACS_peak_78407	380.91	406	ENSMUST00000089182	Gm10231	380.91	10	7.93	Ensembl	647	chr17:5816054-5816700-	intergenic	NA	NA	NA
chr8	70285930	70286252	MACS_peak_180110	379.85	322	ENSMUST00000155711	Homer3	379.85	20.78	7.95	Ensembl	678	chr8:70283034-70286302+	exon sense-overlapping	ENSMUST00000003669	Homer3	chr8:70285246-70294353+
chr2	55435785	55437121	MACS_peak_105061	378.31	1336	ENSMUST00000180810	Gm26794	378.31	15.76	5.31	Ensembl	4312	chr2:55433514-55437860-	natural antisense	ENSMUST00000067101	Kcnj3	chr2:55435970-55598145+
chr8	45772353	45772708	MACS_peak_182294	378.17	355	ENSMUST00000132730	Sorbs2	378.17	8.95	5.31	Ensembl	660	chr8:45772354-45775893+	exon sense-overlapping	ENSMUST00000067065	Sorbs2	chr8:45507788-45827906+
chr11	69314710	69315137	MACS_peak_29474	376.86	427	ENSMUST00000148490	Cntrob	376.86	13.35	8.01	Ensembl	622	chr11:69310043-69315137-	exon sense-overlapping	ENSMUST00000092973	Cntrob	chr11:69299487-69323775-
chr3	89168694	89170115	MACS_peak_109783	376.75	1421	ENSMUST00000138822	Clk2	376.75	14.04	10.26	Ensembl	3168	chr3:89164819-89176919+	exon sense-overlapping	ENSMUST00000090927	Clk2	chr3:89164818-89176921+
chr1	91411482	91412802	MACS_peak_5935	376.3	1320	ENSMUST00000126136	Hes6	376.3	13.62	10.26	Ensembl	1573	chr1:91411483-91413222-	exon sense-overlapping	ENSMUST00000086851	Hes6	chr1:91411483-91413222-
chr4	44138465	44138831	MACS_peak_129083	376.25	366	ENSMUST00000152216	Rnf38	376.25	11.23	5.42	Ensembl	561	chr4:44138466-44139666-	exon sense-overlapping	ENSMUST00000045793	Rnf38	chr4:44126215-44168339-
chr14	62587152	62588085	MACS_peak_59100	374.92	933	ENSMUST00000162987	Fam124a	374.92	4.83	5.44	Ensembl	1671	chr14:62555737-62588523+	exon sense-overlapping	ENSMUST00000039064	Fam124a	chr14:62555737-62608486+
chr2	30967089	30967872	MACS_peak_102888	374.34	783	ENSMUST00000137694	Tor1a	374.34	7.57	5.45	Ensembl	1605	chr2:30960680-30967872-	exon sense-overlapping	ENSMUST00000028200	Tor1a	chr2:30960627-30967933-
chr5	146231229	146231820	MACS_peak_139279	373.42	591	ENSMUST00000162494	Cdk8	373.42	8.53	10.31	Ensembl	2973	chr5:146231230-146302874+	exon sense-overlapping	ENSMUST00000031640	Cdk8	chr5:146231288-146302874+
chr4	148983893	148984364	MACS_peak_139041	373.22	471	uc033igt.1	AK035651	373.22	10.32	5.44	UCSC_knowngene	2899	chr4:148960326-148984671+	natural antisense	ENSMUST00000103217	Pex14	chr4:148960535-149099876-
chr6	48524446	48525105	MACS_peak_158190	371.66	659	ENSMUST00000056948	Gm7887	371.66	8.32	5.43	Ensembl	734	chr6:48524372-48525105-	intergenic	NA	NA	NA
chr11	120633767	120634225	MACS_peak_33481	368.78	458	ENSMUST00000181502	Gm17586	368.78	6.09	10.39	Ensembl	908	chr11:120633768-120635125+	bidirectional	ENSMUST00000058162	Mafg	chr11:120625117-120633600-
chr16	4716115	4716535	MACS_peak_71470	368.12	420	ENSMUST00000125140	Nmral1	368.12	14.57	5.46	Ensembl	921	chr16:4715825-4719104-	exon sense-overlapping	ENSMUST00000074970	Nmral1	chr16:4712295-4719112-
chrX	142297504	142298469	MACS_peak_206310	368.08	965	NR_002883	Gm5643	368.08	20.58	5.46	RefSeq	1733	chrX:142297505-142299237+	intergenic	NA	NA	NA
chr3	87617558	87618792	MACS_peak_121151	367.92	1234	ENSMUST00000136072	Arhgef11	367.92	18.76	5.46	Ensembl	2408	chr3:87617559-87699145+	exon sense-overlapping	ENSMUST00000039476	Arhgef11	chr3:87617575-87738033+
chr11	98798693	98799233	MACS_peak_33417	367.39	540	NR_033551	Gm12359	367.39	9.79	5.46	RefSeq	1401	chr11:98798309-98810089-	intronic antisense	ENSMUST00000126969	Msl1	chr11:98800165-98804119+
chr2	29925568	29926102	MACS_peak_102697	367.23	534	ENSMUST00000152026	Odf2	367.23	13.31	5.46	Ensembl	673	chr2:29925472-29926745+	exon sense-overlapping	ENSMUST00000046571	Odf2	chr2:29889895-29931746+
chr5	67814608	67815131	MACS_peak_145625	367.1	523	ENSMUST00000128726	Atp8a1	367.1	10.4	5.45	Ensembl	750	chr5:67812168-67815239-	exon sense-overlapping	ENSMUST00000037380	Atp8a1	chr5:67618140-67847432-
chr11	100705958	100706493	MACS_peak_33611	365.51	535	ENSMUST00000126299	Kat2a	365.51	5.27	5.43	Ensembl	3269	chr11:100704746-100712449-	exon sense-overlapping	ENSMUST00000006973	Kat2a	chr11:100704746-100712465-
chr2	173021912	173022915	MACS_peak_115239	365.15	1003	ENSMUST00000155512	Rbm38	365.15	21.88	5.44	Ensembl	2281	chr2:173021913-173034728+	exon sense-overlapping	ENSMUST00000029014	Rbm38	chr2:173021902-173034725+
chr17	46500667	46501071	MACS_peak_83599	365.07	404	ENSMUST00000183312	Cul9	365.07	13.27	5.45	Ensembl	500	chr17:46500572-46501071-	exon sense-overlapping	ENSMUST00000066026	Cul9	chr17:46500605-46546388-
chr8	34965144	34965828	MACS_peak_181822	364.34	684	ENSMUST00000067161	Gm9939	364.34	7.06	5.44	Ensembl	1154	chr8:34965052-34966209+	natural antisense	ENSMUST00000033929	Tnks	chr8:34829179-34965690-
chr19	4110799	4111181	MACS_peak_94691	363.18	382	ENSMUST00000126620	Pitpnm1	363.18	10.6	5.42	Ensembl	666	chr19:4110800-4112024+	exon sense-overlapping	ENSMUST00000049658	Pitpnm1	chr19:4099998-4113965+
chr14	61648949	61649301	MACS_peak_59050	362.9	352	ENSMUST00000183031	Gm27017	362.9	9.21	5.45	Ensembl	656	chr14:61648950-61667312+	intergenic	NA	NA	NA
chr5	148182959	148184221	MACS_peak_139458	362.52	1262	ENSMUST00000150411	Gm10167	362.52	15	10.49	Ensembl	1479	chr5:148182899-148184377-	intronic antisense	ENSMUST00000085558	Mtus2	chr5:147957320-148316065+
chr11	53200683	53201021	MACS_peak_25546	362.12	338	ENSMUST00000117979	Gm11189	362.12	23.62	10.5	Ensembl	375	chr11:53200684-53201058+	intergenic	NA	NA	NA
chr11	51619770	51620151	MACS_peak_27444	360.91	381	ENSMUST00000001083	Nhp2	360.91	8.36	8.31	Ensembl	825	chr11:51619771-51623429+	exon sense-overlapping	ENSMUST00000127405	Nhp2	chr11:51619735-51623714+
chr4	136051027	136051720	MACS_peak_134628	358.69	693	ENSMUST00000150565	Rpl11	358.69	7.14	8.33	Ensembl	843	chr4:136051028-136052716-	exon sense-overlapping	ENSMUST00000102536	Rpl11	chr4:136049731-136053393-
chr8	120667756	120668573	MACS_peak_188801	356.38	817	ENSMUST00000180417	Emc8	356.38	7.29	5.6	Ensembl	1863	chr8:120657851-120668573-	exon sense-overlapping	ENSMUST00000034277	Emc8	chr8:120653914-120668121-
chr18	7916051	7916387	MACS_peak_87905	355.13	336	ENSMUST00000167057	Wac	355.13	8.3	5.66	Ensembl	560	chr18:7910601-7916387+	exon sense-overlapping	ENSMUST00000074919	Wac	chr18:7868850-7927067+
chrX	105082694	105083160	MACS_peak_205493	352.98	466	ENSMUST00000125343	Pbdc1	352.98	6.45	5.63	Ensembl	3276	chrX:105079775-105083160+	exon sense-overlapping	ENSMUST00000033577	Pbdc1	chrX:105079756-105085186+
chr6	86682675	86682976	MACS_peak_160692	351.68	301	ENSMUST00000133404	Snrnp27	351.68	6.51	5.63	Ensembl	372	chr6:86682676-86684517-	exon sense-overlapping	ENSMUST00000001186	Snrnp27	chr6:86675221-86684522-
chr8	121797530	121798236	MACS_peak_188892	350.2	706	ENSMUST00000174709	Klhdc4	350.2	9.62	5.62	Ensembl	2834	chr8:121796333-121829540-	exon sense-overlapping	ENSMUST00000045884	Klhdc4	chr8:121796313-121829569-
chr5	138255830	138256333	MACS_peak_153099	349.72	503	ENSMUST00000160157	Lamtor4	349.72	13.65	5.61	Ensembl	980	chr5:138255831-138259398+	exon sense-overlapping	ENSMUST00000062067	Lamtor4	chr5:138255608-138259395+
chr3	97216117	97216625	MACS_peak_120142	347.92	508	ENSMUST00000141861	Bcl9	347.92	7.3	8.3	Ensembl	2500	chr3:97214484-97228330-	exon sense-overlapping	ENSMUST00000046521	Bcl9	chr3:97203662-97227364-
chr17	90567422	90567757	MACS_peak_86000	347.71	335	ENSMUST00000175818	Gm19815	347.71	19.08	8.3	Ensembl	335	chr17:90567423-90567757-	intron sense-overlapping	ENSMUST00000054059	Nrxn1	chr17:90037077-91088726-
chr2	85045354	85045772	MACS_peak_105448	346.41	418	ENSMUST00000127069	Ssrp1	346.41	7.53	8.31	Ensembl	451	chr2:85045355-85046285+	exon sense-overlapping	ENSMUST00000077798	Ssrp1	chr2:85037234-85047109+
chr5	112228608	112229045	MACS_peak_148948	346.29	437	ENSMUST00000182953	Miat	346.29	7.73	5.65	Ensembl	9163	chr5:112213228-112229395-	intergenic	NA	NA	NA
chr5	120682567	120682915	MACS_peak_150281	345.45	348	ENSMUST00000144889	Dtx1	345.45	7.51	5.65	Ensembl	871	chr5:120681202-120682915-	exon sense-overlapping	ENSMUST00000031607	Dtx1	chr5:120680202-120711927-
chr17	24895605	24896319	MACS_peak_80080	345.39	714	uc008ayx.2	Mapk8ip3	345.39	7.99	8.32	UCSC_knowngene	7318	chr17:24892152-24936977-	exon sense-overlapping	ENSMUST00000088345	Mapk8ip3	chr17:24897533-24936968-
chr12	100946996	100947716	MACS_peak_44593	344.8	720	ENSMUST00000180617	A630072L19Rik	344.8	9.01	5.65	Ensembl	3405	chr12:100941742-100949875+	natural antisense	ENSMUST00000068411	Ccdc88c	chr12:100912700-101028983-
chr11	59505661	59506886	MACS_peak_26182	342.33	1225	ENSMUST00000138763	4933439C10Rik	342.33	12.59	10.92	Ensembl	2624	chr11:59505662-59513647+	natural antisense	ENSMUST00000013262	Zkscan17	chr11:59485520-59506644-
chr4	156173002	156173680	MACS_peak_140349	341.88	678	ENSMUST00000181062	Agrn	341.88	7.04	5.67	Ensembl	8612	chr4:156165294-156186107-	exon sense-overlapping	ENSMUST00000071248	Agrn	chr4:156165290-156185901-
chr7	19087745	19088264	MACS_peak_167021	340.69	519	ENSMUST00000148472	Dmpk	340.69	11.55	5.7	Ensembl	967	chr7:19087746-19089358+	exon sense-overlapping	ENSMUST00000032568	Dmpk	chr7:19083849-19093821+
chr11	115513697	115514116	MACS_peak_35145	340.67	419	ENSMUST00000142238	Hn1	340.67	8.57	8.44	Ensembl	561	chr11:115503033-115514116-	exon sense-overlapping	ENSMUST00000021083	Hn1	chr11:115497353-115514387-
chr4	41121546	41121947	MACS_peak_128510	340.29	401	ENSMUST00000129112	Nol6	340.29	6.04	5.71	Ensembl	774	chr4:41121547-41123534-	exon sense-overlapping	ENSMUST00000030138	Nol6	chr4:41114427-41124455-
chr5	138275928	138277487	MACS_peak_153104	337.73	1559	ENSMUST00000162909	Gpc2	337.73	7.74	5.77	Ensembl	4252	chr5:138273657-138279985-	exon sense-overlapping	ENSMUST00000014089	Gpc2	chr5:138273660-138279965-
chr6	83166151	83166465	MACS_peak_157149	337.6	314	ENSMUST00000154953	Gm15624	337.6	8.89	8.54	Ensembl	713	chr6:83166152-83172733-	intronic antisense	ENSMUST00000077407	Dctn1	chr6:83165920-83200116+
chr2	181364013	181365334	MACS_peak_114366	334.18	1321	ENSMUST00000152580	Arfrp1	334.18	10.83	8.65	Ensembl	1822	chr2:181359315-181365334-	exon sense-overlapping	ENSMUST00000108808	Arfrp1	chr2:181359100-181365351-
chr5	30958938	30959412	MACS_peak_128890	333.53	474	ENSMUST00000123211	Preb	333.53	8.62	10.96	Ensembl	756	chr5:30958939-30960252-	exon sense-overlapping	ENSMUST00000074840	Preb	chr5:30950853-30960330-
chr2	38354250	38354852	MACS_peak_94288	332.67	602	ENSMUST00000175896	Lhx2	332.67	5.53	10.94	Ensembl	1243	chr2:38353802-38360089+	exon sense-overlapping	ENSMUST00000000253	Lhx2	chr2:38350759-38369733+
chr2	20969473	20970274	MACS_peak_101600	332.2	801	NR_033225	Gm13375	332.2	5.1	5.83	RefSeq	1385	chr2:20968874-20970348+	natural antisense	ENSMUST00000114594	Arhgap21	chr2:20847919-20968881-
chr5	49552256	49552890	MACS_peak_130506	331.18	634	ENSMUST00000120352	Gm5555	331.18	12.5	10.92	Ensembl	1014	chr5:49552257-49553270+	intergenic	NA	NA	NA
chr15	96281498	96281924	MACS_peak_70132	330.17	426	ENSMUST00000185067	2610037D02Rik	330.17	7.85	5.84	Ensembl	2997	chr15:96281499-96284495-	intergenic	NA	NA	NA
chr6	83796906	83797244	MACS_peak_144879	329.22	338	ENSMUST00000150322	Nagk	329.22	10.87	11.15	Ensembl	803	chr6:83795161-83798621+	exon sense-overlapping	ENSMUST00000037376	Nagk	chr6:83794982-83802556+
chr2	94406150	94406966	MACS_peak_106191	328.72	816	ENSMUST00000152313	2810002D19Rik	328.72	12.26	8.66	Ensembl	2040	chr2:94406151-94411682+	natural antisense	ENSMUST00000028617	Api5	chr2:94411682-94438136-
chr4	119539211	119539529	MACS_peak_134789	328.2	318	ENSMUST00000177165	AA415398	328.2	7.45	5.85	Ensembl	393	chr4:119533544-119539529-	exon sense-overlapping	ENSMUST00000079611	AA415398	chr4:119530308-119538769-
chr10	127481493	127481794	MACS_peak_21970	326.76	301	ENSMUST00000164469	R3hdm2	326.76	10.11	11.16	Ensembl	763	chr10:127481314-127484544+	exon sense-overlapping	ENSMUST00000064793	R3hdm2	chr10:127420867-127499349+
chr19	6370711	6371419	MACS_peak_86222	326.61	708	ENSMUST00000144239	Sf1	326.61	5.01	11.14	Ensembl	785	chr19:6370712-6371694+	exon sense-overlapping	ENSMUST00000113487	Sf1	chr19:6363922-6377196+
chr11	115586875	115588545	MACS_peak_35666	326.49	1670	ENSMUST00000154832	Gga3	326.49	7.95	5.95	Ensembl	4848	chr11:115584364-115589521-	exon sense-overlapping	ENSMUST00000019135	Gga3	chr11:115584255-115604051-
chr7	45786450	45786960	MACS_peak_169380	325.86	510	ENSMUST00000134347	Lmtk3	325.86	7.88	5.95	Ensembl	872	chr7:45785510-45787758+	exon sense-overlapping	ENSMUST00000072580	Lmtk3	chr7:45783947-45804109+
chr9	14558458	14558800	MACS_peak_186543	325.06	342	ENSMUST00000161171	Amotl1	325.06	7.7	8.76	Ensembl	685	chr9:14555673-14559051-	exon sense-overlapping	ENSMUST00000013220	Amotl1	chr9:14541966-14615000-
chr5	121571654	121572181	MACS_peak_147490	324.27	527	ENSMUST00000133033	Aldh2	324.27	9.8	8.74	Ensembl	1035	chr5:121571472-121575127-	exon sense-overlapping	ENSMUST00000031411	Aldh2	chr5:121566027-121593824-
chr2	164501080	164501650	MACS_peak_103632	323.62	570	ENSMUST00000138038	Pigt	323.62	6.86	11.11	Ensembl	2195	chr2:164497546-164503396+	exon sense-overlapping	ENSMUST00000103101	Pigt	chr2:164497520-164508301+
chr10	67157906	67158243	MACS_peak_18318	323.41	337	ENSMUST00000173295	Jmjd1c	323.41	8.71	5.97	Ensembl	651	chr10:67096405-67158243+	exon sense-overlapping	ENSMUST00000051446	Jmjd1c	chr10:67127258-67256326+
chr1	179520374	179520857	MACS_peak_12460	322.87	483	ENSMUST00000178932	Gm5561	322.87	7.22	8.76	Ensembl	483	chr1:179520375-179520857-	intergenic	NA	NA	NA
chrX	103066667	103067180	MACS_peak_205323	321.86	513	ENSMUST00000128361	Pabpc1l2a-ps	321.86	9.77	5.99	Ensembl	513	chrX:103066668-103067180-	intergenic	NA	NA	NA
chr7	34229099	34230236	MACS_peak_168464	321.65	1137	ENSMUST00000180864	Gm26762	321.65	9.35	5.98	Ensembl	5284	chr7:34224755-34230236+	natural antisense	ENSMUST00000038027	Gpi1	chr7:34202122-34230281-
chr11	8884727	8885153	MACS_peak_24814	321.65	426	ENSMUST00000119652	Gm11991	321.65	19.21	8.8	Ensembl	1074	chr11:8884223-8885296-	intron sense-overlapping	ENSMUST00000154153	Pkd1l1	chr11:8826708-8973266-
chr14	50929250	50930324	MACS_peak_57221	321.6	1074	ENSMUST00000159745	Tmem55b	321.6	13.46	8.81	Ensembl	3232	chr14:50927217-50930851-	exon sense-overlapping	ENSMUST00000049312	Tmem55b	chr14:50927215-50930856-
chr7	25297371	25297921	MACS_peak_167494	321.47	550	ENSMUST00000148828	Pafah1b3	321.47	7.17	5.98	Ensembl	1106	chr7:25296620-25297921-	exon sense-overlapping	ENSMUST00000005583	Pafah1b3	chr7:25295049-25297986-
chr10	59806556	59807414	MACS_peak_16389	319.81	858	ENSMUST00000032395	Gm7399	319.81	15.47	11.24	Ensembl	858	chr10:59806557-59807414+	intron sense-overlapping	ENSMUST00000020311	Micu1	chr10:59702599-59864130+
chr5	121451892	121452370	MACS_peak_150430	318.81	478	uc008zjh.1	Tmem116	318.81	12.42	6	UCSC_knowngene	2220	chr5:121451893-121524182+	exon sense-overlapping	ENSMUST00000031405	Tmem116	chr5:121463152-121495421+
chr5	35102127	35102539	MACS_peak_143532	313.9	412	ENSMUST00000152028	Lrpap1	313.9	8.22	6.09	Ensembl	630	chr5:35102128-35105696-	exon sense-overlapping	ENSMUST00000030986	Lrpap1	chr5:35091490-35105766-
chr8	105960459	105960770	MACS_peak_187052	313.54	311	ENSMUST00000143381	Slc12a4	313.54	16.92	6.1	Ensembl	461	chr8:105960460-105966074-	exon sense-overlapping	ENSMUST00000034370	Slc12a4	chr8:105943590-105966115-
chr4	33924592	33925158	MACS_peak_128162	313.24	566	ENSMUST00000133462	Cnr1	313.24	13.5	6.1	Ensembl	757	chr4:33924593-33935316+	exon sense-overlapping	ENSMUST00000057188	Cnr1	chr4:33924632-33948831+
chr5	121802947	121803391	MACS_peak_147553	311.82	444	ENSMUST00000161872	Atxn2	311.82	10.67	8.9	Ensembl	755	chr5:121797359-121803435+	exon sense-overlapping	ENSMUST00000051950	Atxn2	chr5:121711609-121814949+
chrX	8128033	8128517	MACS_peak_202199	311.79	484	ENSMUST00000131929	Wdr13	311.79	9.97	6.07	Ensembl	774	chrX:8125701-8128517-	exon sense-overlapping	ENSMUST00000033506	Wdr13	chrX:8123301-8132808-
chrX	50325775	50326425	MACS_peak_198877	311.42	650	ENSMUST00000117176	Gm7803	311.42	18.6	8.89	Ensembl	1015	chrX:50325518-50326532-	intergenic	NA	NA	NA
chr1	150265534	150265999	MACS_peak_9540	310.63	465	ENSMUST00000121422	Gm15453	310.63	11.26	6.07	Ensembl	465	chr1:150265535-150265999-	intergenic	NA	NA	NA
chr4	118217091	118217680	MACS_peak_134612	310.42	589	ENSMUST00000123484	Ptprf	310.42	14.28	6.06	Ensembl	3306	chr4:118208989-118217680-	exon sense-overlapping	ENSMUST00000049074	Ptprf	chr4:118208213-118291405-
chr7	109027222	109027686	MACS_peak_158038	310.32	464	ENSMUST00000147943	Tub	310.32	10.06	11.4	Ensembl	747	chr7:109027223-109029360+	exon sense-overlapping	ENSMUST00000033341	Tub	chr7:109010825-109034460+
chr11	118476882	118477218	MACS_peak_35709	308.91	336	ENSMUST00000153825	Gm11748	308.91	18.72	8.97	Ensembl	1498	chr11:118476470-118479458-	natural antisense	ENSMUST00000135383	Engase	chr11:118476829-118489209+
chr2	152323070	152324440	MACS_peak_112539	307.72	1370	ENSMUST00000128645	Rbck1	307.72	12.92	6.06	Ensembl	1595	chr2:152322938-152324616-	exon sense-overlapping	ENSMUST00000028964	Rbck1	chr2:152316334-152332653-
chr11	101125202	101125828	MACS_peak_33709	307.62	626	ENSMUST00000137844	Tubg1	307.62	10.71	6.07	Ensembl	852	chr11:101124500-101125828+	exon sense-overlapping	ENSMUST00000043680	Tubg1	chr11:101119938-101126419+
chr16	58463495	58463823	MACS_peak_75505	307.15	328	ENSMUST00000134324	Dcbld2	307.15	16.08	9.04	Ensembl	891	chr16:58456377-58463823+	exon sense-overlapping	ENSMUST00000046663	Dcbld2	chr16:58408443-58469727+
chr4	129197112	129197441	MACS_peak_122917	307.11	329	ENSMUST00000128287	Yars	307.11	12.27	11.4	Ensembl	647	chr4:129189902-129197441+	exon sense-overlapping	ENSMUST00000001365	Yars	chr4:129189795-129219607+
chr14	30558720	30559865	MACS_peak_56747	306.56	1145	ENSMUST00000160189	Tkt	306.56	8.5	6.05	Ensembl	3159	chr14:30549181-30562400+	exon sense-overlapping	ENSMUST00000022529	Tkt	chr14:30549131-30574722+
chr15	76422553	76423835	MACS_peak_67399	305.81	1282	ENSMUST00000160986	Mroh1	305.81	12.5	6.05	Ensembl	9830	chr15:76380523-76453035+	exon sense-overlapping	ENSMUST00000092595	Mroh1	chr15:76390031-76439744+
chr11	97163913	97164222	MACS_peak_32779	305.81	309	ENSMUST00000132633	Kpnb1	305.81	5.25	9.12	Ensembl	643	chr11:97162510-97164222-	exon sense-overlapping	ENSMUST00000001479	Kpnb1	chr11:97159714-97187881-
chr5	136485527	136485851	MACS_peak_152853	304.14	324	ENSMUST00000177305	Cux1	304.14	6.3	6.04	Ensembl	3290	chr5:136482875-136567490-	exon sense-overlapping	ENSMUST00000004097	Cux1	chr5:136266410-136567445-
chr7	4119910	4120728	MACS_peak_166231	304.1	818	NR_033568	9430041J12Rik	304.1	12.41	6.04	RefSeq	2312	chr7:4074125-4120728-	natural antisense	ENSMUST00000079415	Ttyh1	chr7:4119585-4135333+
chr17	3043935	3044726	MACS_peak_78034	303.93	791	ENSMUST00000165157	Gm10232	303.93	10.2	9.15	Ensembl	867	chr17:3043884-3044750-	intergenic	NA	NA	NA
chr2	26344237	26344758	MACS_peak_102112	303.56	521	ENSMUST00000142057	Gpsm1	303.56	15.31	6.03	Ensembl	834	chr2:26344238-26346910+	exon sense-overlapping	ENSMUST00000066889	Gpsm1	chr2:26319773-26348237+
chr12	61523149	61524830	MACS_peak_40753	302.09	1681	ENSMUST00000130887	Lrfn5	302.09	6.05	6.02	Ensembl	1724	chr12:61523150-61605008+	exon sense-overlapping	ENSMUST00000055815	Lrfn5	chr12:61523948-61845258+
chr11	102406361	102406845	MACS_peak_33897	301.55	484	ENSMUST00000147860	Slc25a39	301.55	5.91	6.02	Ensembl	656	chr11:102405739-102406884-	exon sense-overlapping	ENSMUST00000018821	Slc25a39	chr11:102402985-102407544-
chr3	145938643	145939096	MACS_peak_125603	301.38	453	ENSMUST00000138876	2410004B18Rik	301.38	8.35	6.02	Ensembl	545	chr3:145938644-145943853+	exon sense-overlapping	ENSMUST00000039571	2410004B18Rik	chr3:145938014-145944829+
chr8	84892650	84893164	MACS_peak_167654	301.33	514	ENSMUST00000128023	Gcdh	301.33	9.87	11.37	Ensembl	542	chr8:84892651-84893475-	exon sense-overlapping	ENSMUST00000003907	Gcdh	chr8:84886393-84893917-
chr19	38931029	38931512	MACS_peak_96128	300.91	483	ENSMUST00000138292	Hells	300.91	6.38	9.14	Ensembl	693	chr19:38931030-38940500+	exon sense-overlapping	ENSMUST00000025965	Hells	chr19:38930915-38971051+
chr8	32008808	32009564	MACS_peak_177732	300.38	756	ENSMUST00000181702	Gm26578	300.38	7.92	9.2	Ensembl	4611	chr8:32008504-32015759+	intergenic	NA	NA	NA
chr1	172505119	172505934	MACS_peak_11853	300.31	815	ENSMUST00000138296	Tagln2	300.31	10.24	6.06	Ensembl	1101	chr1:172500047-172505934+	exon sense-overlapping	ENSMUST00000111228	Tagln2	chr1:172501252-172506733+
chr1	153229041	153229383	MACS_peak_9884	299.97	342	ENSMUST00000160515	Lamc1	299.97	4.79	9.21	Ensembl	466	chr1:153228761-153229418-	exon sense-overlapping	ENSMUST00000027752	Lamc1	chr1:153218922-153332786-
chr5	30791998	30792327	MACS_peak_142803	299.55	329	ENSMUST00000136657	Dpysl5	299.55	5.53	6.08	Ensembl	676	chr5:30791999-30796414+	exon sense-overlapping	ENSMUST00000088081	Dpysl5	chr5:30711894-30799369+
chr9	124439587	124440122	MACS_peak_201973	299.52	535	uc029xhe.1	AK054122	299.52	17.04	6.08	UCSC_knowngene	795	chr9:124438995-124440897-	exon sense-overlapping	ENSMUST00000180233	Gm20783	chr9:124438996-124440899-
chr14	101919122	101919842	MACS_peak_61406	299.2	720	ENSMUST00000159154	Lmo7	299.2	7.43	6.08	Ensembl	3330	chr14:101919077-101930760+	exon sense-overlapping	ENSMUST00000100337	Lmo7	chr14:101729957-101934710+
chr5	120122795	120123481	MACS_peak_147257	298.98	686	NR_045793	Gm10390	298.98	11.67	9.25	RefSeq	3977	chr5:120121096-120139263-	natural antisense	ENSMUST00000031590	Rbm19	chr5:120116510-120197979+
chr18	34938695	34939437	MACS_peak_81325	298.05	742	ENSMUST00000172829	Hspa9	298.05	6	11.38	Ensembl	883	chr18:34938696-34940862-	exon sense-overlapping	ENSMUST00000025217	Hspa9	chr18:34937414-34954357-
chr17	8801692	8802145	MACS_peak_79997	296.92	453	ENSMUST00000141877	Pde10a	296.92	12.13	6.12	Ensembl	782	chr17:8801693-8899189+	exon sense-overlapping	ENSMUST00000024647	Pde10a	chr17:8880426-8982367+
chr11	55399191	55399523	MACS_peak_27897	296.05	332	ENSMUST00000123775	Sparc	296.05	3.61	9.29	Ensembl	909	chr11:55395386-55399574-	exon sense-overlapping	ENSMUST00000018737	Sparc	chr11:55394500-55420080-
chr8	4267254	4267662	MACS_peak_178924	295.67	408	ENSMUST00000135755	Timm44	295.67	4.75	6.15	Ensembl	888	chr8:4266294-4267662-	exon sense-overlapping	ENSMUST00000003029	Timm44	chr8:4259731-4275913-
chr3	94863891	94864378	MACS_peak_119737	295.13	487	ENSMUST00000132544	Pogz	295.13	9.02	9.26	Ensembl	744	chr3:94863728-94864550+	exon sense-overlapping	ENSMUST00000042402	Pogz	chr3:94837713-94880875+
chr14	43121778	43122101	MACS_peak_52300	295.02	323	ENSMUST00000169632	Gm7236	295.02	12.77	11.38	Ensembl	330	chr14:43121772-43122101-	intergenic	NA	NA	NA
chr9	66592448	66593156	MACS_peak_196567	293.97	708	uc009qfa.1	BC053974	293.97	12.86	6.13	UCSC_knowngene	1509	chr9:66592449-66593957-	exon sense-overlapping	ENSMUST00000098613	Usp3	chr9:66517227-66593036-
chr4	41199715	41200077	MACS_peak_128529	293.81	362	ENSMUST00000143552	Ubap2	293.81	11.86	6.14	Ensembl	502	chr4:41199218-41200077-	exon sense-overlapping	ENSMUST00000030143	Ubap2	chr4:41194316-41275135-
chr11	60140651	60141247	MACS_peak_28639	293.07	596	ENSMUST00000156902	Rai1	293.07	13.82	6.14	Ensembl	708	chr11:60140259-60141247+	exon sense-overlapping	ENSMUST00000064190	Rai1	chr11:60105013-60199195+
chr11	115350491	115351003	MACS_peak_35113	292.87	512	ENSMUST00000146256	Hid1	292.87	11.7	9.36	Ensembl	762	chr11:115349009-115351003-	exon sense-overlapping	ENSMUST00000044152	Hid1	chr11:115347707-115367719-
chr5	37122974	37123342	MACS_peak_143876	292.79	368	ENSMUST00000126527	Jakmip1	292.79	16.47	6.13	Ensembl	516	chr5:37122975-37125024+	exon sense-overlapping	ENSMUST00000043794	Jakmip1	chr5:37050857-37125299+
chr8	65967046	65967421	MACS_peak_183455	292.77	375	ENSMUST00000155804	2022-03-01	292.77	12.1	6.13	Ensembl	1505	chr8:65618037-65968328+	exon sense-overlapping	ENSMUST00000072482	2022-03-01	chr8:65967157-66471625+
chr2	26391865	26392398	MACS_peak_100452	292.24	533	ENSMUST00000139535	Pmpca	292.24	7.97	9.36	Ensembl	785	chr2:26390927-26392398+	exon sense-overlapping	ENSMUST00000076431	Pmpca	chr2:26389339-26397122+
chr2	26503497	26503824	MACS_peak_102168	288.86	327	ENSMUST00000131393	Notch1	288.86	10.16	6.23	Ensembl	4132	chr2:26498155-26503824-	exon sense-overlapping	ENSMUST00000028288	Notch1	chr2:26457903-26503822-
chr15	34082693	34083413	MACS_peak_64642	288.44	720	ENSMUST00000172082	Mtdh	288.44	6.29	6.24	Ensembl	4582	chr15:34082694-34103345+	exon sense-overlapping	ENSMUST00000022865	Mtdh	chr15:34082719-34142386+
chr2	150608216	150608687	MACS_peak_110516	288.19	471	ENSMUST00000156345	Gm14123	288.19	13.33	9.53	Ensembl	2658	chr2:150606233-150610254+	natural antisense	ENSMUST00000046399	Apmap	chr2:150583080-150608567-
chrX	57053897	57054387	MACS_peak_199086	287.31	490	ENSMUST00000134785	Htatsf1	287.31	7.88	9.56	Ensembl	2664	chrX:57053898-57057204+	exon sense-overlapping	ENSMUST00000088652	Htatsf1	chrX:57053615-57067183+
chr2	160684447	160684783	MACS_peak_103115	286.99	336	ENSMUST00000129289	Top1	286.99	6.31	11.57	Ensembl	698	chr2:160670133-160684951+	exon sense-overlapping	ENSMUST00000109468	Top1	chr2:160645888-160722764+
chr6	67205618	67206037	MACS_peak_156326	286.69	419	ENSMUST00000120174	Gm8566	286.69	13.03	9.56	Ensembl	465	chr6:67205619-67206083+	intergenic	NA	NA	NA
chr4	129661112	129661439	MACS_peak_136295	285.85	327	ENSMUST00000146361	Kpna6	285.85	13.86	6.23	Ensembl	534	chr4:129660997-129672767-	exon sense-overlapping	ENSMUST00000003828	Kpna6	chr4:129647484-129662479-
chr11	97574916	97575226	MACS_peak_33196	285.04	310	ENSMUST00000142123	Srcin1	285.04	12.77	6.24	Ensembl	399	chr11:97551890-97575226-	exon sense-overlapping	ENSMUST00000107590	Srcin1	chr11:97517675-97573944-
chrX	61785380	61785871	MACS_peak_199228	284.85	491	ENSMUST00000120925	Gm7327	284.85	17.11	9.61	Ensembl	652	chrX:61785381-61786032+	intergenic	NA	NA	NA
chr18	65991150	65991868	MACS_peak_92523	284.52	718	ENSMUST00000144793	Lman1	284.52	4.62	6.28	Ensembl	2139	chr18:65991151-65993660-	exon sense-overlapping	ENSMUST00000048260	Lman1	chr18:65980754-66002637-
chr8	70402430	70402798	MACS_peak_183974	284.29	368	ENSMUST00000125273	Crtc1	284.29	12.56	6.28	Ensembl	695	chr8:70397755-70402798-	exon sense-overlapping	ENSMUST00000076615	Crtc1	chr8:70382355-70439579-
chrX	52898576	52899509	MACS_peak_198975	284.12	933	ENSMUST00000079261	Rps2-ps13	284.12	9.12	9.6	Ensembl	933	chrX:52898577-52899509+	intergenic	NA	NA	NA
chr7	83631219	83631842	MACS_peak_172545	282.87	623	uc009idp.1	AK042300	282.87	19.46	6.33	UCSC_knowngene	1865	chr7:83597048-83631842-	natural antisense	ENSMUST00000039317	Tmc3	chr7:83584931-83625614+
chr4	21857179	21857566	MACS_peak_127606	282.68	387	ENSMUST00000152666	Sfrs18	282.68	8.35	6.34	Ensembl	3470	chr4:21848058-21860468+	exon sense-overlapping	ENSMUST00000029911	Sfrs18	chr4:21847583-21876475+
chr4	41569176	41569538	MACS_peak_128611	280.91	362	ENSMUST00000146276	Fam219a	280.91	6.49	6.35	Ensembl	661	chr4:41524116-41569538-	exon sense-overlapping	ENSMUST00000108049	Fam219a	chr4:41517691-41569509-
chr5	92054078	92055700	MACS_peak_144154	280.78	1622	ENSMUST00000181481	Gm26582	280.78	7.35	9.74	Ensembl	3135	chr5:92043064-92055960+	natural antisense	ENSMUST00000113127	G3bp2	chr5:92052161-92083735-
chr2	25706503	25707355	MACS_peak_102023	280.4	852	uc012bsf.1	AK082064	280.4	7.71	6.34	UCSC_knowngene	1605	chr2:25705850-25709716-	natural antisense	ENSMUST00000061483	Bmyc	chr2:25706879-25707717+
chr16	85553232	85553943	MACS_peak_76823	280.1	711	ENSMUST00000161209	Gm2541	280.1	20.31	9.79	Ensembl	711	chr16:85553233-85553943-	intergenic	NA	NA	NA
chr4	149160639	149160953	MACS_peak_139078	279.99	314	ENSMUST00000137982	Pgd	279.99	8.11	6.33	Ensembl	687	chr4:149160293-149161654-	exon sense-overlapping	ENSMUST00000084124	Pgd	chr4:149149991-149166707-
chr7	24919201	24919776	MACS_peak_151385	279.16	575	ENSMUST00000129928	Arhgef1	279.16	9.72	11.69	Ensembl	777	chr7:24919202-24922379+	exon sense-overlapping	ENSMUST00000047873	Arhgef1	chr7:24903037-24926589+
chr12	3238512	3239328	MACS_peak_37076	278.94	816	ENSMUST00000178074	1700012B15Rik	278.94	12.31	6.39	Ensembl	4006	chr12:3235504-3241410+	intergenic	NA	NA	NA
chr4	34353979	34354802	MACS_peak_115769	278.17	823	ENSMUST00000177911	Gm12751	278.17	9.93	11.76	Ensembl	875	chr4:34353980-34354854+	intergenic	NA	NA	NA
chr6	125152190	125152771	MACS_peak_164295	278.16	581	ENSMUST00000135559	Iffo1	278.16	8.46	6.37	Ensembl	2868	chr6:125146026-125161776+	exon sense-overlapping	ENSMUST00000051171	Iffo1	chr6:125145244-125161774+
chr2	180894104	180894877	MACS_peak_105285	277.94	773	ENSMUST00000183124	Gm27032	277.94	9.95	11.76	Ensembl	1116	chr2:180894105-180895220+	intergenic	NA	NA	NA
chr10	80254839	80255140	MACS_peak_19826	277.71	301	ENSMUST00000155336	Ndufs7	277.71	7.55	6.39	Ensembl	770	chr10:80253315-80255140+	exon sense-overlapping	ENSMUST00000020361	Ndufs7	chr10:80249452-80256792+
chr6	91171969	91172343	MACS_peak_158242	277.64	374	ENSMUST00000134154	Hdac11	277.64	13.83	9.95	Ensembl	815	chr6:91171764-91173283+	exon sense-overlapping	ENSMUST00000041736	Hdac11	chr6:91156665-91174692+
chr6	18848640	18848988	MACS_peak_152523	275.32	348	ENSMUST00000136982	Naa38	275.32	10.68	9.98	Ensembl	3305	chr6:18848641-18855751+	exon sense-overlapping	ENSMUST00000056398	Naa38	chr6:18848579-18854053+
chr16	20392450	20392927	MACS_peak_66535	273.49	477	ENSMUST00000134413	Abcc5	273.49	10.25	11.84	Ensembl	4875	chr16:20331308-20399621-	exon sense-overlapping	ENSMUST00000077867	Abcc5	chr16:20392675-20425986-
chr19	56928248	56928553	MACS_peak_90107	273.47	305	ENSMUST00000155467	Afap1l2	273.47	11.89	11.84	Ensembl	776	chr19:56920398-56928553-	exon sense-overlapping	ENSMUST00000111584	Afap1l2	chr19:56912361-57008210-
chr2	151503013	151503374	MACS_peak_112429	271.21	361	ENSMUST00000133197	Nsfl1c	271.21	6.1	6.46	Ensembl	685	chr2:151494311-151503423+	exon sense-overlapping	ENSMUST00000028949	Nsfl1c	chr2:151494293-151511305+
chr2	155460357	155460892	MACS_peak_112991	270.54	535	ENSMUST00000116491	Gm14239	270.54	9.99	6.49	Ensembl	685	chr2:155459501-155460892-	intron sense-overlapping	ENSMUST00000109670	Ncoa6	chr2:155390665-155473806-
chr15	59315076	59316129	MACS_peak_66235	269.92	1053	ENSMUST00000162142	Sqle	269.92	5.76	6.48	Ensembl	4467	chr15:59315077-59328958+	exon sense-overlapping	ENSMUST00000022977	Sqle	chr15:59315081-59331192+
chr13	26492513	26493094	MACS_peak_43395	269.65	581	ENSMUST00000074645	Gm11353	269.65	4.76	11.9	Ensembl	706	chr13:26492514-26493219+	intergenic	NA	NA	NA
chr16	4068662	4069021	MACS_peak_71307	269.32	359	ENSMUST00000138594	Trap1	269.32	10.84	6.48	Ensembl	621	chr16:4065330-4077827-	exon sense-overlapping	ENSMUST00000006137	Trap1	chr16:4039971-4077827-
chr4	10848402	10849072	MACS_peak_124737	268.83	670	ENSMUST00000084908	Gm12918	268.83	5.81	10.15	Ensembl	691	chr4:10848403-10849093+	intergenic	NA	NA	NA
chr9	47799172	47800416	MACS_peak_189967	268.56	1244	NR_046048	Gm10677	268.56	10.78	10.17	RefSeq	2102	chr9:47799160-47818208-	natural antisense	ENSMUST00000034581	Cadm1	chr9:47530373-47850390+
chr11	94425239	94425977	MACS_peak_32783	268.21	738	ENSMUST00000133000	Cacna1g	268.21	12.34	6.46	Ensembl	784	chr11:94425240-94426462-	exon sense-overlapping	ENSMUST00000021234	Cacna1g	chr11:94408406-94474198-
chr3	87527756	87528292	MACS_peak_121142	267.43	536	ENSMUST00000152010	Etv3	267.43	11.52	6.45	Ensembl	3819	chr3:87525618-87531034+	exon sense-overlapping	ENSMUST00000117293	Etv3	chr3:87525614-87531031+
chr1	186739430	186739863	MACS_peak_13106	267.42	433	ENSMUST00000162336	Rrp15	267.42	8.22	10.22	Ensembl	3092	chr1:186721092-186749325-	exon sense-overlapping	ENSMUST00000001339	Rrp15	chr1:186720978-186749358-
chr2	131262494	131262815	MACS_peak_109065	265.41	321	ENSMUST00000131779	Pank2	265.41	6.54	10.28	Ensembl	1304	chr2:131262495-131283437+	exon sense-overlapping	ENSMUST00000145904	Pank2	chr2:131262796-131296331+
chr11	50131861	50132187	MACS_peak_27283	264.77	326	ENSMUST00000147628	Tbc1d9b	264.77	10.57	10.26	Ensembl	668	chr11:50131402-50140458+	exon sense-overlapping	ENSMUST00000093138	Tbc1d9b	chr11:50131396-50172030+
chr9	54501350	54501760	MACS_peak_190583	264.77	410	ENSMUST00000131452	Dmxl2	264.77	11.13	10.26	Ensembl	652	chr9:54473870-54501760-	exon sense-overlapping	ENSMUST00000118163	Dmxl2	chr9:54365158-54501626-
chr5	24595389	24595846	MACS_peak_142071	264.04	457	ENSMUST00000123223	Smarcd3	264.04	8.38	6.58	Ensembl	538	chr5:24595164-24595846-	exon sense-overlapping	ENSMUST00000030791	Smarcd3	chr5:24592622-24602012-
chr12	80517583	80518916	MACS_peak_41586	263.97	1333	ENSMUST00000181852	Gm26777	263.97	16.48	10.26	Ensembl	2573	chr12:80509951-80518916-	bidirectional	ENSMUST00000021558	Galnt16	chr12:80518990-80603896+
chr11	98693804	98694491	MACS_peak_33392	263.37	687	ENSMUST00000152102	Psmd3	263.37	5.25	6.6	Ensembl	2850	chr11:98682591-98695049+	exon sense-overlapping	ENSMUST00000017365	Psmd3	chr11:98682554-98695979+
chr2	11586866	11587168	MACS_peak_91396	263.3	302	ENSMUST00000150369	Rbm17	263.3	5.75	12.08	Ensembl	663	chr2:11585441-11587168-	exon sense-overlapping	ENSMUST00000040314	Rbm17	chr2:11585439-11603235-
chr2	91152146	91152564	MACS_peak_105643	263.14	418	ENSMUST00000132791	Madd	263.14	16.27	10.32	Ensembl	675	chr2:91152147-91154795-	exon sense-overlapping	ENSMUST00000066473	Madd	chr2:91137361-91183818-
chr7	28777190	28777684	MACS_peak_151911	262.69	494	ENSMUST00000141077	Sirt2	262.69	7.75	12.1	Ensembl	643	chr7:28776858-28777684+	exon sense-overlapping	ENSMUST00000072965	Sirt2	chr7:28766767-28788660+
chr6	67036677	67037186	MACS_peak_159325	262.25	509	ENSMUST00000128617	Gadd45a	262.25	8.44	6.61	Ensembl	703	chr6:67035579-67037186-	exon sense-overlapping	ENSMUST00000043098	Gadd45a	chr6:67035096-67037406-
chr2	122147716	122148079	MACS_peak_99623	262.17	363	uc008mag.1	BC002288	262.17	7	12.08	UCSC_knowngene	1644	chr2:122147717-122149360+	exon sense-overlapping	ENSMUST00000102476	B2m	chr2:122147686-122153083+
chr7	143713495	143713943	MACS_peak_178549	261.59	448	ENSMUST00000153864	Osbpl5	261.59	14.37	6.61	Ensembl	700	chr7:143713496-143740299-	exon sense-overlapping	ENSMUST00000020411	Osbpl5	chr7:143688762-143741963-
chr12	20990458	20990872	MACS_peak_34713	260.83	414	uc007ndh.1	AK018309	260.83	14.05	12.07	UCSC_knowngene	813	chr12:20990459-21043333+	intergenic	NA	NA	NA
chr4	43058952	43059285	MACS_peak_116471	260.81	333	ENSMUST00000126878	Unc13b	260.81	18.68	12.07	Ensembl	712	chr4:43058953-43166122+	exon sense-overlapping	ENSMUST00000079978	Unc13b	chr4:43058969-43264871+
chr2	181680309	181680735	MACS_peak_114424	260.65	426	ENSMUST00000129686	Tcea2	260.65	16.28	10.39	Ensembl	2167	chr2:181680310-181687347+	exon sense-overlapping	ENSMUST00000103042	Tcea2	chr2:181680310-181688071+
chr10	70174815	70175167	MACS_peak_18676	260.27	352	ENSMUST00000145990	Ccdc6	260.27	6.11	10.38	Ensembl	706	chr10:70174509-70182206+	exon sense-overlapping	ENSMUST00000135607	Ccdc6	chr10:70175047-70188187+
chr9	57095247	57095581	MACS_peak_176500	259.07	334	ENSMUST00000165927	Sin3a	259.07	9.59	12.09	Ensembl	641	chr9:57095248-57097880+	exon sense-overlapping	ENSMUST00000049169	Sin3a	chr9:57086581-57128366+
chr11	98010003	98010376	MACS_peak_33281	259.03	373	ENSMUST00000124170	Cacnb1	259.03	9.49	6.64	Ensembl	721	chr11:98009660-98012551-	exon sense-overlapping	ENSMUST00000017552	Cacnb1	chr11:98001508-98022634-
chr9	20869603	20869946	MACS_peak_172739	259.03	343	ENSMUST00000175820	A230050P20Rik	259.03	13.34	12.08	Ensembl	3210	chr9:20868658-20874307+	exon sense-overlapping	ENSMUST00000043911	A230050P20Rik	chr9:20868642-20874307+
chr4	119241481	119241804	MACS_peak_132243	258.3	323	ENSMUST00000136278	Lepre1	258.3	16.33	10.48	Ensembl	2750	chr4:119232954-119248369+	exon sense-overlapping	ENSMUST00000030393	Lepre1	chr4:119232939-119248975+
chr17	35703895	35704256	MACS_peak_83041	256.72	361	ENSMUST00000135203	Gm4577	256.72	10.01	6.65	Ensembl	716	chr17:35703896-35708244+	intronic antisense	ENSMUST00000134995	Ddr1	chr17:35690059-35704621-
chr9	13431360	13432740	MACS_peak_186399	256.54	1380	NR_028271	Phxr4	256.54	12.85	10.47	RefSeq	1391	chr9:13431361-13432740+	exon sense-overlapping	ENSMUST00000071254	Phxr4	chr9:13431361-13432736+
chr11	5064416	5065094	MACS_peak_24534	255.71	678	ENSMUST00000151936	Gas2l1	255.71	10.85	6.65	Ensembl	758	chr11:5064417-5065294-	exon sense-overlapping	ENSMUST00000037146	Gas2l1	chr11:5055378-5065300-
chr5	91962481	91962978	MACS_peak_144149	255.4	497	uc008ybz.1	Thap6	255.4	5.3	10.49	UCSC_knowngene	1337	chr5:91962389-91966598+	natural antisense	ENSMUST00000031345	Rchy1	chr5:91948904-91963068-
chr8	60923554	60924283	MACS_peak_179344	254.73	729	ENSMUST00000129672	Clcn3	254.73	10.13	10.48	Ensembl	8193	chr8:60911923-60955233-	exon sense-overlapping	ENSMUST00000004430	Clcn3	chr8:60911923-60983239-
chr15	75565582	75566259	MACS_peak_61095	254.29	677	ENSMUST00000150125	Ly6h	254.29	3.77	12.2	Ensembl	847	chr15:75565213-75566632-	exon sense-overlapping	ENSMUST00000023241	Ly6h	chr15:75564747-75566657-
chr19	4396310	4397095	MACS_peak_94772	254.27	785	ENSMUST00000176495	Kdm2a	254.27	9.73	6.67	Ensembl	3207	chr19:4392471-4397095-	exon sense-overlapping	ENSMUST00000047898	Kdm2a	chr19:4316144-4398285-
chr7	3645267	3646109	MACS_peak_150309	252.67	842	uc009evk.3	AK031165	252.67	5.31	12.43	UCSC_knowngene	4313	chr7:3645268-3649580+	exon sense-overlapping	ENSMUST00000038913	Cnot3	chr7:3645352-3661100+
chr11	54344775	54345245	MACS_peak_27986	251.33	470	ENSMUST00000127107	Gm12224	251.33	8.28	6.75	Ensembl	726	chr11:54344634-54353430-	intronic antisense	ENSMUST00000139484	Acsl6	chr11:54345888-54361528+
chr10	108636550	108636964	MACS_peak_20568	250.97	414	ENSMUST00000147593	Syt1	250.97	9.08	12.51	Ensembl	717	chr10:108627286-108636964-	exon sense-overlapping	ENSMUST00000064054	Syt1	chr10:108497652-109010982-
chr11	101295377	101295808	MACS_peak_30670	250.95	431	ENSMUST00000153438	Cntd1	250.95	5.32	12.51	Ensembl	2120	chr11:101286055-101296317+	exon sense-overlapping	ENSMUST00000103107	Cntd1	chr11:101279096-101288701+
chr16	3985012	3987181	MACS_peak_70106	250.89	2169	uc012aap.2	Slx4	250.89	12.81	10.67	UCSC_knowngene	4224	chr16:3979106-3989119-	exon sense-overlapping	ENSMUST00000040790	Slx4	chr16:3979123-4001680-
chr3	129826823	129827160	MACS_peak_124603	250.78	337	ENSMUST00000127864	Gar1	250.78	12.89	6.76	Ensembl	522	chr3:129825552-129827280-	exon sense-overlapping	ENSMUST00000029643	Gar1	chr3:129824912-129831396-
chr11	3333039	3333412	MACS_peak_24225	250.72	373	ENSMUST00000139139	Pik3ip1	250.72	6.25	6.75	Ensembl	897	chr11:3332972-3333960+	exon sense-overlapping	ENSMUST00000045153	Pik3ip1	chr11:3330401-3342971+
chr11	115490637	115491198	MACS_peak_32393	249.88	561	ENSMUST00000124778	Nt5c	249.88	8.94	12.5	Ensembl	907	chr11:115490638-115491851-	exon sense-overlapping	ENSMUST00000021082	Nt5c	chr11:115490420-115491862-
chr1	93505192	93505601	MACS_peak_6677	248.91	409	ENSMUST00000152476	2022-09-02	248.91	7.61	10.72	Ensembl	466	chr1:93505193-93507019+	exon sense-overlapping	ENSMUST00000027495	2022-09-02	chr1:93478964-93510260+
chr2	14189608	14189938	MACS_peak_99395	248.52	330	ENSMUST00000120155	Gm13320	248.52	9.95	10.74	Ensembl	330	chr2:14189609-14189938-	intronic antisense	ENSMUST00000077517	Tmem236	chr2:14174524-14221971+
chr17	6107399	6107788	MACS_peak_72284	248.07	389	ENSMUST00000126982	Tulp4	248.07	9.89	12.54	Ensembl	906	chr17:6107400-6122344+	intron sense-overlapping	ENSMUST00000142030	Tulp4	chr17:6106479-6206914+
chr7	62190716	62191201	MACS_peak_170782	248.04	485	uc009hfe.1	AK086712	248.04	9.48	6.8	UCSC_knowngene	3054	chr7:62094506-62209530-	intergenic	NA	NA	NA
chr2	72483563	72484016	MACS_peak_104726	247.63	453	ENSMUST00000130730	Cdca7	247.63	7.43	10.72	Ensembl	598	chr2:72483564-72484743+	exon sense-overlapping	ENSMUST00000102691	Cdca7	chr2:72476159-72486893+
chr13	54556338	54556651	MACS_peak_45362	247.55	313	ENSMUST00000143173	4833439L19Rik	247.55	5.9	12.56	Ensembl	874	chr13:54556194-54565291-	exon sense-overlapping	ENSMUST00000026989	4833439L19Rik	chr13:54551218-54565435-
chr7	45570073	45571192	MACS_peak_169342	247.04	1119	ENSMUST00000142260	0610005C13Rik	247.04	21.04	6.8	Ensembl	2434	chr7:45569086-45575173-	intronic antisense	NM_001243052	Bcat2	chr7:45571279-45589710+
chr2	179976852	179977192	MACS_peak_105176	246.73	340	NR_033782	4921531C22Rik	246.73	18.47	12.61	RefSeq	1905	chr2:179976853-179979013+	bidirectional	ENSMUST00000041618	Taf4a	chr2:179912146-179976646-
chr7	89976743	89977049	MACS_peak_172938	246.41	306	ENSMUST00000157001	Eed	246.41	10.97	6.8	Ensembl	454	chr7:89976744-89980559-	exon sense-overlapping	ENSMUST00000107234	Eed	chr7:89954656-89980983-
chr3	51560748	51562323	MACS_peak_118916	246.13	1575	ENSMUST00000180404	5031434O11Rik	246.13	18.51	6.79	Ensembl	3727	chr3:51560036-51567114+	natural antisense	ENSMUST00000037141	Setd7	chr3:51515319-51560878-
chr17	7764811	7765366	MACS_peak_78723	245.88	555	ENSMUST00000114579	Fndc1	245.88	14.59	10.77	Ensembl	4054	chr17:7761300-7767675-	exon sense-overlapping	ENSMUST00000097425	Fndc1	chr17:7738569-7804974-
chr1	128038526	128039022	MACS_peak_8297	245.76	496	ENSMUST00000180256	Rpl28-ps1	245.76	6.51	10.76	Ensembl	496	chr1:128038527-128039022+	intronic antisense	ENSMUST00000086614	Zranb3	chr1:127954184-128102462-
chr12	4133102	4133778	MACS_peak_36638	245.3	676	ENSMUST00000152792	Adcy3	245.3	15.18	10.74	Ensembl	5621	chr12:4133103-4213525+	exon sense-overlapping	ENSMUST00000020984	Adcy3	chr12:4134153-4213524+
chr2	118693866	118694640	MACS_peak_109309	243.95	774	ENSMUST00000132577	Pak6	243.95	7.79	6.85	Ensembl	3248	chr2:118677263-118697236+	exon sense-overlapping	ENSMUST00000099557	Pak6	chr2:118663303-118698020+
chr4	55366776	55367459	MACS_peak_130009	243.5	683	ENSMUST00000127266	Rad23b	243.5	8.69	6.86	Ensembl	2176	chr4:55350050-55368574+	exon sense-overlapping	ENSMUST00000030134	Rad23b	chr4:55350043-55392237+
chr10	42812435	42812742	MACS_peak_16696	243.21	307	ENSMUST00000144228	Sec63	243.21	4.86	6.87	Ensembl	4137	chr10:42761806-42812742+	exon sense-overlapping	ENSMUST00000019937	Sec63	chr10:42761496-42832514+
chr2	160750776	160751909	MACS_peak_103138	243.09	1133	ENSMUST00000133937	Zhx3	243.09	10.3	12.78	Ensembl	3532	chr2:160748708-160872998-	exon sense-overlapping	ENSMUST00000103112	Zhx3	chr2:160765782-160859631-
chr7	29366400	29366991	MACS_peak_168104	243.03	591	ENSMUST00000182911	Sipa1l3	243.03	10.88	6.86	Ensembl	1708	chr7:29365584-29367291-	exon sense-overlapping	ENSMUST00000085809	Sipa1l3	chr7:29320378-29505460-
chr7	130979300	130979650	MACS_peak_177368	243.03	350	ENSMUST00000150717	Htra1	243.03	12.19	6.86	Ensembl	1572	chr7:130936111-130979934+	exon sense-overlapping	ENSMUST00000006367	Htra1	chr7:130936203-130985660+
chr2	32377096	32378528	MACS_peak_103218	242.18	1432	ENSMUST00000146423	1110008P14Rik	242.18	7.99	6.86	Ensembl	2618	chr2:32377097-32381862-	exon sense-overlapping	ENSMUST00000048792	1110008P14Rik	chr2:32379101-32381938-
chr5	106695797	106696166	MACS_peak_145384	241.75	369	ENSMUST00000142391	Zfp644	241.75	8.89	10.89	Ensembl	1484	chr5:106689820-106696166-	exon sense-overlapping	ENSMUST00000045466	Zfp644	chr5:106616741-106695975-
chr17	28999818	29000144	MACS_peak_80858	240.75	326	ENSMUST00000145298	Stk38	240.75	6.95	10.86	Ensembl	2767	chr17:28997564-29007896-	exon sense-overlapping	ENSMUST00000009138	Stk38	chr17:28970885-29007937-
chr5	115560740	115561074	MACS_peak_149611	238.94	334	ENSMUST00000155584	Rplp0	238.94	2.4	6.88	Ensembl	600	chr5:115559623-115561074+	exon sense-overlapping	ENSMUST00000086519	Rplp0	chr5:115559467-115563727+
chr11	121298515	121298855	MACS_peak_36364	238.34	340	ENSMUST00000151492	Foxk2	238.34	6.55	10.9	Ensembl	607	chr11:121298516-121299850+	exon sense-overlapping	ENSMUST00000106113	Foxk2	chr11:121259990-121309896+
chr11	72043016	72043664	MACS_peak_30007	238.16	648	ENSMUST00000127369	Fam64a	238.16	9.19	6.91	Ensembl	681	chr11:72042502-72043664+	exon sense-overlapping	ENSMUST00000021164	Fam64a	chr11:72042455-72047370+
chr12	108806279	108806641	MACS_peak_45403	237.96	362	ENSMUST00000126912	Yy1	237.96	11.04	6.9	Ensembl	715	chr12:108806239-108815564+	exon sense-overlapping	ENSMUST00000021692	Yy1	chr12:108792973-108816632+
chr7	25284669	25284998	MACS_peak_151484	237.94	329	ENSMUST00000168956	Cic	237.94	5.22	13.03	Ensembl	745	chr7:25284670-25285684+	exon sense-overlapping	ENSMUST00000005578	Cic	chr7:25282179-25294148+
chr4	128960874	128961559	MACS_peak_136166	237.78	685	ENSMUST00000156739	Adc	237.78	12.95	6.91	Ensembl	1104	chr4:128960705-128962428-	exon sense-overlapping	ENSMUST00000030581	Adc	chr4:128932022-128962439-
chr10	80038015	80038613	MACS_peak_19771	237.23	598	ENSMUST00000143438	Polr2e	237.23	11.33	6.92	Ensembl	2403	chr10:80035949-80039710-	exon sense-overlapping	ENSMUST00000004786	Polr2e	chr10:80035949-80039795-
chr2	129800310	129801459	MACS_peak_110625	237.01	1149	NR_029452	4932416H05Rik	237.01	8.86	6.93	RefSeq	3091	chr2:129798369-129801459-	natural antisense	ENSMUST00000165413	Stk35	chr2:129800517-129828974+
chr5	145170514	145170917	MACS_peak_154136	236.72	403	ENSMUST00000160574	Cpsf4	236.72	17.99	6.94	Ensembl	1204	chr5:145167268-145181232+	exon sense-overlapping	ENSMUST00000070487	Cpsf4	chr5:145167224-145182041+
chr6	18846699	18847360	MACS_peak_155625	236.26	661	ENSMUST00000180863	Gm26809	236.26	11.97	6.94	Ensembl	2981	chr6:18844220-18847360+	intergenic	NA	NA	NA
chr6	136827643	136828280	MACS_peak_165144	235.03	637	uc009emh.1	AK044622	235.03	8.79	6.98	UCSC_knowngene	1706	chr6:136827644-136829349+	exon sense-overlapping	ENSMUST00000052702	BC049715	chr6:136828843-136840536+
chr9	75314063	75314546	MACS_peak_193106	234.02	483	uc009qrz.1	AK134928	234.02	6.98	10.98	UCSC_knowngene	1377	chr9:75310335-75314871-	natural antisense	ENSMUST00000076889	Gnb5	chr9:75311395-75344964+
chr11	83764885	83765281	MACS_peak_31703	233.55	396	ENSMUST00000127428	Heatr6	233.55	10.59	7.04	Ensembl	709	chr11:83760688-83765281+	exon sense-overlapping	ENSMUST00000001002	Heatr6	chr11:83753696-83783754+
chr1	75491204	75491811	MACS_peak_5114	233.55	607	ENSMUST00000145382	Obsl1	233.55	11.62	10.99	Ensembl	724	chr1:75490969-75491811-	exon sense-overlapping	ENSMUST00000113567	Obsl1	chr1:75485825-75506361-
chr4	155943849	155944775	MACS_peak_140309	233.37	926	uc008wfo.1	AK160359	233.37	17.36	7.04	UCSC_knowngene	1856	chr4:155943850-155945705+	exon sense-overlapping	ENSMUST00000024056	Ube2j2	chr4:155943850-155959604+
chr7	98709876	98710233	MACS_peak_173846	233.32	357	ENSMUST00000146473	Prkrir	233.32	7.86	7.04	Ensembl	670	chr7:98709877-98715257+	exon sense-overlapping	ENSMUST00000033009	Prkrir	chr7:98703103-98718062+
chr2	105692736	105693042	MACS_peak_108590	233.23	306	ENSMUST00000147946	Pax6	233.23	6.17	7.04	Ensembl	527	chr2:105692483-105693125+	exon sense-overlapping	ENSMUST00000090391	Pax6	chr2:105676128-105697071+
chr10	116581280	116581720	MACS_peak_22834	232.92	440	ENSMUST00000064101	5330438D12Rik	232.92	11.45	11.02	Ensembl	2229	chr10:116581281-116583515+	natural antisense	ENSMUST00000020374	Cnot2	chr10:116509791-116581511-
chr12	20920841	20921262	MACS_peak_38206	232.29	421	uc007ndf.1	AK148766	232.29	12.41	7.03	UCSC_knowngene	2004	chr12:20875640-20921262-	intron sense-overlapping	ENSMUST00000079237	Zfp125	chr12:20899822-20900867-
chr2	72978897	72979286	MACS_peak_106462	231.89	389	ENSMUST00000133615	Sp3	231.89	6.21	7.03	Ensembl	3870	chr2:72936652-72979286-	exon sense-overlapping	ENSMUST00000066003	Sp3	chr2:72936648-72980426-
chr8	124862724	124863439	MACS_peak_189527	231.4	715	uc009nxr.1	AK148282	231.4	5.86	7.06	UCSC_knowngene	1119	chr8:124831698-124863703+	exon sense-overlapping	ENSMUST00000034466	Gnpat	chr8:124863033-124890057+
chr19	5109426	5109841	MACS_peak_85960	231.4	415	ENSMUST00000137403	Klc2	231.4	7.25	13.28	Ensembl	841	chr19:5109427-5111445-	exon sense-overlapping	ENSMUST00000025798	Klc2	chr19:5107746-5118300-
chr17	14950179	14950715	MACS_peak_80550	231.31	536	ENSMUST00000168938	Phf10	231.31	5	7.06	Ensembl	3901	chr17:14947738-14961273-	exon sense-overlapping	ENSMUST00000024657	Phf10	chr17:14945009-14961273-
chr2	32384632	32384971	MACS_peak_101457	231.01	339	ENSMUST00000147219	Lcn2	231.01	7.56	11.14	Ensembl	1374	chr2:32384633-32387722-	exon sense-overlapping	ENSMUST00000050785	Lcn2	chr2:32384633-32387797-
chrX	80533906	80534505	MACS_peak_199835	229.28	599	ENSMUST00000120076	Gm8806	229.28	7.63	11.21	Ensembl	1407	chrX:80533745-80535151-	intergenic	NA	NA	NA
chr5	130188394	130188796	MACS_peak_151715	228.55	402	ENSMUST00000118998	Gm15920	228.55	8.29	7.13	Ensembl	402	chr5:130188395-130188796+	intron sense-overlapping	ENSMUST00000026390	Rabgef1	chr5:130187161-130214337+
chr5	110386383	110387461	MACS_peak_134132	228.34	1078	ENSMUST00000180866	Gm26711	228.34	12.03	13.35	Ensembl	1833	chr5:110385835-110388073+	intronic antisense	ENSMUST00000069483	Fbrsl1	chr5:110361754-110448503-
chr1	86064450	86064805	MACS_peak_5680	228.05	355	ENSMUST00000143200	Psmd1	228.05	6.37	7.14	Ensembl	613	chr1:86064387-86071660+	exon sense-overlapping	ENSMUST00000027432	Psmd1	chr1:86064619-86139151+
chr4	47453720	47454400	MACS_peak_129518	228.05	680	ENSMUST00000121539	Gm12430	228.05	21.59	7.14	Ensembl	1322	chr4:47453632-47454953+	intergenic	NA	NA	NA
chr16	76330559	76330864	MACS_peak_77586	228.03	305	ENSMUST00000128871	Nrip1	228.03	10.11	7.14	Ensembl	2617	chr16:76328495-76373040-	exon sense-overlapping	ENSMUST00000054178	Nrip1	chr16:76290862-76373049-
chr2	148709117	148709433	MACS_peak_112243	228.03	316	ENSMUST00000140647	Napb	228.03	12.4	7.14	Ensembl	3087	chr2:148706418-148732391-	exon sense-overlapping	ENSMUST00000028926	Napb	chr2:148693985-148732467-
chr10	120208792	120209406	MACS_peak_23196	227.22	614	uc007hew.1	AK162942	227.22	15.38	7.15	UCSC_knowngene	1042	chr10:120208793-120209834+	exon sense-overlapping	ENSMUST00000020446	Tmbim4	chr10:120208750-120224917+
chr4	129622276	129622787	MACS_peak_122979	227.06	511	ENSMUST00000152708	Ccdc28b	227.06	5.82	13.39	Ensembl	923	chr4:129622162-129623844-	exon sense-overlapping	ENSMUST00000030586	Ccdc28b	chr4:129619274-129623947-
chr7	61134264	61134591	MACS_peak_167201	226.88	327	uc009hex.1	DOKist4	226.88	6.7	11.3	UCSC_knowngene	3503	chr7:61089568-61221965-	intergenic	NA	NA	NA
chr11	99932161	99933109	MACS_peak_33205	224.68	948	ENSMUST00000117567	Gm11560	224.68	6.08	11.34	Ensembl	948	chr11:99932162-99933109+	intergenic	NA	NA	NA
chr10	41485641	41486609	MACS_peak_16582	224.39	968	ENSMUST00000126833	Smpd2	224.39	7.4	11.32	Ensembl	4150	chr10:41485642-41490330-	exon sense-overlapping	ENSMUST00000019965	Smpd2	chr10:41487172-41490340-
chr1	136147733	136148741	MACS_peak_9236	224.01	1008	ENSMUST00000122892	Kif21b	224.01	6.16	7.3	Ensembl	2606	chr1:136131454-136149993+	exon sense-overlapping	ENSMUST00000075164	Kif21b	chr1:136131389-136177998+
chr4	149364630	149365277	MACS_peak_136359	223.3	647	uc008vwf.1	AK020898	223.3	14.23	11.32	UCSC_knowngene	1286	chr4:149347885-149365277+	natural antisense	ENSMUST00000103212	Ube4b	chr4:149328416-149426749-
chr4	107031014	107031485	MACS_peak_120589	221.65	471	ENSMUST00000131111	Ssbp3	221.65	8.35	13.57	Ensembl	568	chr4:107030832-107031485+	exon sense-overlapping	ENSMUST00000030367	Ssbp3	chr4:106911470-107049694+
chr6	54039553	54040155	MACS_peak_158564	221.18	602	ENSMUST00000138930	Chn2	221.18	10.46	7.3	Ensembl	672	chr6:54039554-54067798+	exon sense-overlapping	ENSMUST00000046856	Chn2	chr6:54039573-54300721+
chr2	105394678	105395069	MACS_peak_106812	220.59	391	ENSMUST00000127019	Rcn1	220.59	5.92	11.44	Ensembl	2208	chr2:105386929-105395348-	exon sense-overlapping	ENSMUST00000006128	Rcn1	chr2:105386291-105399319-
chr8	84911852	84913528	MACS_peak_167656	220.57	1676	ENSMUST00000128400	Dnase2a	220.57	5.97	13.61	Ensembl	4073	chr8:84908721-84914521+	exon sense-overlapping	ENSMUST00000003910	Dnase2a	chr8:84908560-84911469+
chrX	73921271	73921855	MACS_peak_199579	219.79	584	ENSMUST00000149591	Naa10	219.79	10.81	11.46	Ensembl	649	chrX:73920977-73921855-	exon sense-overlapping	ENSMUST00000033763	Naa10	chrX:73916873-73921944-
chr16	56024223	56024634	MACS_peak_75331	219.41	411	ENSMUST00000130818	Pcnp	219.41	5.09	11.49	Ensembl	938	chr16:56016999-56029676-	exon sense-overlapping	ENSMUST00000096021	Pcnp	chr16:56017191-56024668-
chr17	25958368	25959729	MACS_peak_73934	218.41	1361	uc008bcy.1	Capn15	218.41	11.79	13.58	UCSC_knowngene	4562	chr17:25958369-25985706-	exon sense-overlapping	ENSMUST00000041641	Capn15	chr17:25959556-25985680-
chr11	70010876	70011779	MACS_peak_29828	218.39	903	uc007jtn.1	Dvl2	218.39	6.12	7.36	UCSC_knowngene	5028	chr11:70000626-70012301+	exon sense-overlapping	ENSMUST00000019362	Dvl2	chr11:70000595-70010111+
chr1	66322275	66323086	MACS_peak_4254	217.88	811	ENSMUST00000147494	Gm10558	217.88	5.78	7.35	Ensembl	1661	chr1:66322276-66328796-	natural antisense	ENSMUST00000024639	Map2	chr1:66251662-66442581+
chr3	36000039	36000711	MACS_peak_116355	217.37	672	NR_029456	Mccc1os	217.37	14.9	11.59	RefSeq	4451	chr3:35999913-36008828+	natural antisense	ENSMUST00000029259	Mccc1	chr3:35959839-36000678-
chr18	80987455	80987790	MACS_peak_94137	215.69	335	ENSMUST00000184638	RP23-148P22.2	215.69	11.35	7.42	Ensembl	642	chr18:80987456-80988575+	bidirectional	ENSMUST00000057950	Sall3	chr18:80966376-80986578-
chr10	74863094	74863413	MACS_peak_19001	214.64	319	ENSMUST00000097166	Gm6419	214.64	4.42	7.49	Ensembl	432	chr10:74862988-74863419-	intergenic	NA	NA	NA
chr1	162683855	162684256	MACS_peak_10985	214.08	401	ENSMUST00000182535	Prrc2c	214.08	5.89	7.5	Ensembl	593	chr1:162683738-162688189-	exon sense-overlapping	ENSMUST00000028016	Prrc2c	chr1:162673402-162740550-
chrX	101292543	101292925	MACS_peak_185218	213.69	382	ENSMUST00000148846	Med12	213.69	8.8	13.74	Ensembl	3273	chrX:101286024-101297465+	exon sense-overlapping	ENSMUST00000087948	Med12	chrX:101274260-101297465+
chr7	49556247	49556730	MACS_peak_153562	213.59	483	uc012flb.1	AK088944	213.59	7.68	13.75	UCSC_knowngene	2839	chr7:49553892-49556730+	exon sense-overlapping	ENSMUST00000064395	Nav2	chr7:49246189-49610087+
chr6	124712703	124713068	MACS_peak_148481	213.4	365	ENSMUST00000150847	Phb2	213.4	4.15	13.73	Ensembl	593	chr6:124712336-124713068+	exon sense-overlapping	ENSMUST00000004375	Phb2	chr6:124712336-124716950+
chr12	108178773	108179390	MACS_peak_44486	213.27	617	uc033gff.1	Ccnk	213.27	11.48	11.9	UCSC_knowngene	1205	chr12:108178774-108186622+	exon sense-overlapping	ENSMUST00000101055	Ccnk	chr12:108179738-108203359+
chrX	105373386	105374346	MACS_peak_200996	212.84	960	NR_015552	5330434G04Rik	212.84	11.62	11.92	RefSeq	3449	chrX:105372994-105391754-	intergenic	NA	NA	NA
chr10	81580256	81581096	MACS_peak_20167	212.02	840	ENSMUST00000129798	Tle2	212.02	11.82	7.53	Ensembl	4388	chr10:81575260-81590470+	exon sense-overlapping	ENSMUST00000124854	Tle2	chr10:81587969-81590473+
chr3	89224108	89224670	MACS_peak_121528	211.78	562	ENSMUST00000174324	Mtx1	211.78	7.39	7.55	Ensembl	630	chr3:89224109-89227088-	exon sense-overlapping	ENSMUST00000174126	Mtx1	chr3:89209356-89227052-
chr17	34831768	34832152	MACS_peak_82920	211.03	384	ENSMUST00000160993	Stk19	211.03	9.97	7.53	Ensembl	768	chr17:34831769-34836927-	exon sense-overlapping	ENSMUST00000077477	Stk19	chr17:34823993-34836945-
chr4	128883579	128884577	MACS_peak_136139	210.65	998	ENSMUST00000147852	Trim62	210.65	6.49	7.53	Ensembl	2722	chr4:128883580-128903565+	exon sense-overlapping	ENSMUST00000035667	Trim62	chr4:128883588-128911328+
chr19	30056998	30057726	MACS_peak_95448	210.06	728	ENSMUST00000134518	Uhrf2	210.06	10.39	12.13	Ensembl	3231	chr19:30030513-30058812+	exon sense-overlapping	ENSMUST00000025739	Uhrf2	chr19:30030513-30093722+
chr4	155854565	155855180	MACS_peak_126542	209.91	615	ENSMUST00000141539	Dvl1	209.91	4.97	13.95	Ensembl	3286	chr4:155847586-155859303+	exon sense-overlapping	ENSMUST00000030948	Dvl1	chr4:155847402-155859303+
chr7	111080418	111080964	MACS_peak_175005	209.88	546	ENSMUST00000162394	Eif4g2	209.88	7.73	7.51	Ensembl	716	chr7:111080419-111082827-	exon sense-overlapping	ENSMUST00000106666	Eif4g2	chr7:111067985-111083030-
chr2	49308154	49309462	MACS_peak_104656	209.82	1308	ENSMUST00000119733	Gm13509	209.82	5.83	7.51	Ensembl	1308	chr2:49308155-49309462+	intron sense-overlapping	ENSMUST00000047413	Mbd5	chr2:49245969-49317069+
chr15	79247276	79247800	MACS_peak_67899	209.77	524	ENSMUST00000165609	Pick1	209.77	10.72	7.51	Ensembl	2559	chr15:79229411-79247963+	exon sense-overlapping	ENSMUST00000018295	Pick1	chr15:79229382-79249466+
chr15	67175634	67176726	MACS_peak_66690	209.68	1092	uc007wbc.1	AK169958	209.68	9.05	7.5	UCSC_knowngene	3090	chr15:67173637-67176726-	exon sense-overlapping	NM_009177	St3gal1	chr15:67102875-67176882-
chr2	32312683	32313077	MACS_peak_103193	209.54	394	ENSMUST00000141633	Dnm1	209.54	8.06	7.5	Ensembl	495	chr2:32312242-32313077-	exon sense-overlapping	ENSMUST00000078352	Dnm1	chr2:32308471-32353247-
chr4	126320961	126321361	MACS_peak_122390	209.46	400	ENSMUST00000133068	Adprhl2	209.46	10.57	13.98	Ensembl	538	chr4:126318151-126321361-	exon sense-overlapping	ENSMUST00000102617	Adprhl2	chr4:126316047-126321703-
chr7	139840227	139840972	MACS_peak_174501	208.52	745	ENSMUST00000129454	Gpr123	208.52	9.95	12.21	Ensembl	1413	chr7:139834962-139841204+	exon sense-overlapping	ENSMUST00000026548	Gpr123	chr7:139834174-139878088+
chr13	21500952	21501352	MACS_peak_46838	208.23	400	ENSMUST00000177829	Gm11273	208.23	6.75	12.21	Ensembl	475	chr13:21500953-21501430-	exon sense-overlapping	ENSMUST00000044043	Gm11273	chr13:21501029-21501418-
chr11	116134907	116135325	MACS_peak_35801	207.97	418	ENSMUST00000133159	Mrpl38	207.97	17.41	7.55	Ensembl	913	chr11:116132785-116138789-	exon sense-overlapping	ENSMUST00000106439	Mrpl38	chr11:116131817-116138868-
chr17	24351949	24352251	MACS_peak_81057	207.36	302	ENSMUST00000133816	Abca3	207.36	8.87	7.58	Ensembl	3758	chr17:24351950-24397783+	exon sense-overlapping	ENSMUST00000039013	Abca3	chr17:24352023-24410201+
chr8	61533353	61533707	MACS_peak_183224	206.83	354	ENSMUST00000136825	Palld	206.83	4.46	7.58	Ensembl	680	chr8:61525121-61533841-	exon sense-overlapping	ENSMUST00000034057	Palld	chr8:61515021-61902690-
chr19	6137338	6137640	MACS_peak_86180	206.34	302	ENSMUST00000134821	Arl2	206.34	7.77	14.05	Ensembl	2305	chr19:6134374-6141140-	exon sense-overlapping	ENSMUST00000025893	Arl2	chr19:6134383-6141406-
chr10	81250662	81252118	MACS_peak_20085	206.32	1456	ENSMUST00000132174	Zfr2	206.32	12.36	7.6	Ensembl	4525	chr10:81233187-81252121+	exon sense-overlapping	ENSMUST00000117798	Zfr2	chr10:81233155-81252123+
chr5	86831370	86831700	MACS_peak_143889	204.18	330	ENSMUST00000151489	Ythdc1	204.18	8.48	12.29	Ensembl	6313	chr5:86815655-86836659+	exon sense-overlapping	ENSMUST00000038384	Ythdc1	chr5:86804564-86836657+
chr10	80412626	80413062	MACS_peak_18296	204.07	436	ENSMUST00000129027	Tcf3	204.07	6.68	14.12	Ensembl	819	chr10:80412627-80415487-	exon sense-overlapping	ENSMUST00000020377	Tcf3	chr10:80409608-80433621-
chr18	16774308	16774619	MACS_peak_80166	203.7	311	ENSMUST00000152779	Cdh2	203.7	3.57	14.16	Ensembl	3351	chr18:16771397-16808462-	exon sense-overlapping	ENSMUST00000025166	Cdh2	chr18:16588877-16809246-
chr1	92910852	92912145	MACS_peak_6557	203.46	1293	ENSMUST00000180306	Rnpepl1	203.46	8.11	7.72	Ensembl	2556	chr1:92910853-92913408+	exon sense-overlapping	ENSMUST00000027487	Rnpepl1	chr1:92910783-92920841+
chr17	25782789	25783582	MACS_peak_81384	201.34	793	ENSMUST00000129917	Haghl	201.34	7.63	7.82	Ensembl	1790	chr17:25782790-25785335-	exon sense-overlapping	ENSMUST00000077938	Haghl	chr17:25782789-25785673-
chr15	84786892	84788109	MACS_peak_68875	201.16	1217	uc007xcl.2	BC048859	201.16	9.35	7.83	UCSC_knowngene	4578	chr15:84785377-84789954-	exon sense-overlapping	ENSMUST00000016768	Phf21b	chr15:84785381-84855110-
chr2	29938494	29938955	MACS_peak_100967	200.46	461	ENSMUST00000154490	Gle1	200.46	5.71	12.46	Ensembl	860	chr2:29935428-29938955+	exon sense-overlapping	ENSMUST00000019859	Gle1	chr2:29935426-29960371+
chr17	17345455	17345935	MACS_peak_80716	200.28	480	ENSMUST00000052440	Oaz1-ps	200.28	21.07	7.82	Ensembl	681	chr17:17345456-17346140-	intergenic	NA	NA	NA
chr19	7398545	7399077	MACS_peak_95431	200.15	532	ENSMUST00000178377	Rab11b-ps2	200.15	7.63	7.84	Ensembl	657	chr19:7398421-7399077-	intergenic	NA	NA	NA
chr10	81265429	81265807	MACS_peak_20075	200.12	378	ENSMUST00000145452	Mrpl54	200.12	5.19	12.47	Ensembl	530	chr10:81265430-81266924-	exon sense-overlapping	ENSMUST00000046114	Mrpl54	chr10:81264713-81266934-
chr4	148452256	148452571	MACS_peak_136189	199.32	315	ENSMUST00000123566	Mtor	199.32	10.07	12.53	Ensembl	2229	chr4:148448611-148454969+	exon sense-overlapping	ENSMUST00000057580	Mtor	chr4:148448625-148454973+
chr7	27664157	27664573	MACS_peak_167802	198.28	416	ENSMUST00000152032	Map3k10	198.28	7.64	7.83	Ensembl	574	chr7:27664158-27665107-	exon sense-overlapping	ENSMUST00000036453	Map3k10	chr7:27656375-27674594-
chr11	69021029	69021642	MACS_peak_27155	197.38	613	ENSMUST00000135611	Ctc1	197.38	12.25	14.21	Ensembl	3035	chr11:69015926-69025159+	exon sense-overlapping	ENSMUST00000021278	Ctc1	chr11:69015911-69036473+
chr10	80785781	80786421	MACS_peak_19954	197.34	640	ENSMUST00000163526	Dot1l	197.34	7.77	7.86	Ensembl	790	chr10:80785164-80786421+	exon sense-overlapping	ENSMUST00000105336	Dot1l	chr10:80755206-80795461+
chr15	83581766	83582239	MACS_peak_68717	197.34	473	ENSMUST00000134334	Ttll12	197.34	5.36	7.86	Ensembl	709	chr15:83581767-83586892-	exon sense-overlapping	ENSMUST00000016901	Ttll12	chr15:83575644-83595157-
chr5	140677158	140677506	MACS_peak_150454	197.33	348	ENSMUST00000136385	Iqce	197.33	9.16	12.56	Ensembl	6924	chr5:140663505-140702265-	exon sense-overlapping	ENSMUST00000041783	Iqce	chr5:140661827-140702378-
chr6	121378959	121379909	MACS_peak_160901	197.17	950	NR_110358	Iqsec3	197.17	14.42	12.57	RefSeq	7540	chr6:121372928-121473678-	exon sense-overlapping	ENSMUST00000046373	Iqsec3	chr6:121372933-121473678-
chr7	45708139	45708471	MACS_peak_169369	196.67	332	ENSMUST00000123587	Dbp	196.67	10.59	7.89	Ensembl	1732	chr7:45707104-45710028+	exon sense-overlapping	ENSMUST00000080885	Dbp	chr7:45705088-45710155+
chr17	65802930	65803295	MACS_peak_84983	196.51	365	ENSMUST00000162408	Ppp4r1	196.51	9.24	7.89	Ensembl	715	chr17:65802745-65810594+	exon sense-overlapping	ENSMUST00000073104	Ppp4r1	chr17:65783355-65841926+
chrX	53418480	53418883	MACS_peak_203535	196.43	403	ENSMUST00000118956	Gm14584	196.43	7.7	7.89	Ensembl	637	chrX:53418331-53418967+	intergenic	NA	NA	NA
chr8	120572635	120573020	MACS_peak_188778	196.15	385	ENSMUST00000147327	Gse1	196.15	7.14	7.89	Ensembl	809	chr8:120571281-120573272+	exon sense-overlapping	ENSMUST00000034279	Gse1	chr8:120488447-120581390+
chr4	155755828	155756162	MACS_peak_140269	195.93	334	ENSMUST00000134317	Atad3a	195.93	7.9	7.89	Ensembl	697	chr4:155755829-155761087-	exon sense-overlapping	ENSMUST00000030903	Atad3a	chr4:155740641-155761093-
chr2	59347923	59348256	MACS_peak_103544	195.93	333	ENSMUST00000124127	Pkp4	195.93	5.86	12.6	Ensembl	661	chr2:59342197-59348256+	exon sense-overlapping	ENSMUST00000037903	Pkp4	chr2:59161008-59355208+
chr3	152667524	152667832	MACS_peak_125981	195.81	308	NR_040386	AI115009	195.81	11.07	7.89	RefSeq	1853	chr3:152666913-152681432+	natural antisense	ENSMUST00000045262	Ak5	chr3:152462815-152668140-
chr7	30564081	30564607	MACS_peak_165080	195.62	526	ENSMUST00000168555	U2af1l4	195.62	8.18	12.6	Ensembl	883	chr7:30563339-30565164+	exon sense-overlapping	ENSMUST00000043273	U2af1l4	chr7:30563321-30565365+
chr14	103346215	103346814	MACS_peak_61491	195.48	599	ENSMUST00000162537	Mycbp2	195.48	9.44	7.88	Ensembl	3495	chr14:103311695-103346814-	exon sense-overlapping	ENSMUST00000159855	Mycbp2	chr14:103113411-103346800-
chr9	62428262	62429053	MACS_peak_195874	195.23	791	ENSMUST00000151604	Coro2b	195.23	6.78	7.9	Ensembl	816	chr9:62428263-62429250-	exon sense-overlapping	ENSMUST00000048043	Coro2b	chr9:62419492-62537044-
chr1	45389849	45390252	MACS_peak_2823	195.19	403	ENSMUST00000150143	Col5a2	195.19	12.21	7.89	Ensembl	2951	chr1:45389031-45393634-	exon sense-overlapping	ENSMUST00000086430	Col5a2	chr1:45374321-45503282-
chr3	87207550	87208005	MACS_peak_109458	194.97	455	ENSMUST00000098980	Gm10705	194.97	15.89	14.36	Ensembl	465	chr3:87207541-87208005-	intergenic	NA	NA	NA
chr5	99728743	99729065	MACS_peak_133147	194.91	322	ENSMUST00000142639	A930011G23Rik	194.91	13.74	14.36	Ensembl	2741	chr5:99556527-99729065-	exon sense-overlapping	ENSMUST00000146396	A930011G23Rik	chr5:99297244-99729045-
chr9	41580740	41581402	MACS_peak_193342	194.65	662	ENSMUST00000181214	2610203C20Rik	194.65	9.34	7.88	Ensembl	3270	chr9:41580741-41592827+	intergenic	NA	NA	NA
chr15	34958730	34959076	MACS_peak_63725	194.6	346	ENSMUST00000128425	Stk3	194.6	6.85	12.6	Ensembl	605	chr15:34958564-34999922-	exon sense-overlapping	ENSMUST00000018476	Stk3	chr15:34875496-35155806-
chrX	152037590	152037890	MACS_peak_202297	194.29	300	ENSMUST00000135172	Smc1a	194.29	4.13	12.6	Ensembl	617	chrX:152036447-152038058+	exon sense-overlapping	ENSMUST00000045312	Smc1a	chrX:152016428-152062694+
chr3	88913377	88913903	MACS_peak_121441	194	526	ENSMUST00000147828	Msto1	194	8.06	7.91	Ensembl	3891	chr3:88909644-88913903-	exon sense-overlapping	ENSMUST00000107494	Msto1	chr3:88905107-88913931-
chr11	18326845	18327416	MACS_peak_25024	193.84	571	ENSMUST00000119030	Gm12020	193.84	14.16	12.6	Ensembl	2042	chr11:18325630-18327671-	intergenic	NA	NA	NA
chr9	33728212	33728889	MACS_peak_192607	193.02	677	ENSMUST00000116000	Gm10698	193.02	3.49	7.95	Ensembl	677	chr9:33728213-33728889+	intergenic	NA	NA	NA
chr7	34210071	34210377	MACS_peak_168457	192.73	306	ENSMUST00000135243	Gpi1	192.73	4.88	7.97	Ensembl	3195	chr7:34202159-34210377-	exon sense-overlapping	ENSMUST00000038027	Gpi1	chr7:34202122-34230281-
chr11	117825286	117825632	MACS_peak_36131	192.7	346	ENSMUST00000150027	Tk1	192.7	11.64	7.98	Ensembl	903	chr11:117824834-117825817-	exon sense-overlapping	ENSMUST00000026661	Tk1	chr11:117815526-117826092-
chr4	129899092	129899902	MACS_peak_123016	192.65	810	ENSMUST00000118024	Gm12966	192.65	8.93	14.36	Ensembl	810	chr4:129899093-129899902+	intergenic	NA	NA	NA
chr2	32558317	32558653	MACS_peak_93429	192.26	336	ENSMUST00000136816	Fam102a	192.26	12.48	14.38	Ensembl	5935	chr2:32535332-32569750+	exon sense-overlapping	ENSMUST00000048375	Fam102a	chr2:32535359-32569756+
chr6	146996441	146996901	MACS_peak_150031	192.24	460	ENSMUST00000126774	Ppfibp1	192.24	6.68	14.37	Ensembl	700	chr6:146996442-147002249+	exon sense-overlapping	ENSMUST00000016631	Ppfibp1	chr6:146888487-147032025+
chr7	27537579	27537940	MACS_peak_167766	192.18	361	ENSMUST00000142981	Pld3	192.18	7.13	7.98	Ensembl	859	chr7:27533454-27537940-	exon sense-overlapping	ENSMUST00000117095	Pld3	chr7:27532000-27553212-
chr16	31970414	31970806	MACS_peak_73106	191.91	392	ENSMUST00000121730	Gm15696	191.91	14.94	12.68	Ensembl	445	chr16:31970362-31970806-	intron sense-overlapping	ENSMUST00000023457	Senp5	chr16:31962506-32003287-
chr15	84960469	84960983	MACS_peak_68922	191.56	514	ENSMUST00000124308	5031439G07Rik	191.56	11.73	7.96	Ensembl	5106	chr15:84948000-84960983-	exon sense-overlapping	ENSMUST00000047144	5031439G07Rik	chr15:84943936-84988000-
chr15	12574888	12575677	MACS_peak_63546	191.24	789	ENSMUST00000100754	Gm2606	191.24	4.75	7.99	Ensembl	1002	chr15:12574889-12575890+	intronic antisense	ENSMUST00000075317	Pdzd2	chr15:12357054-12592556-
chr17	29491176	29491925	MACS_peak_80920	191.13	749	ENSMUST00000181920	Gm26885	191.13	12.97	12.74	Ensembl	1688	chr17:29461896-29491925-	natural antisense	ENSMUST00000024811	Pim1	chr17:29490812-29495445+
chr4	150855467	150855814	MACS_peak_139398	190.63	347	ENSMUST00000128640	Errfi1	190.63	17.58	7.95	Ensembl	546	chr4:150855073-150855814+	exon sense-overlapping	ENSMUST00000030811	Errfi1	chr4:150855073-150868887+
chr2	164837356	164837660	MACS_peak_112473	190.31	304	ENSMUST00000140213	Ctsa	190.31	4.89	12.78	Ensembl	380	chr2:164837182-164837660+	exon sense-overlapping	ENSMUST00000017904	Ctsa	chr2:164832873-164841032+
chr10	80170424	80171204	MACS_peak_19826	190.19	780	ENSMUST00000151321	Cirbp	190.19	5.53	12.8	Ensembl	894	chr10:80170227-80171204+	exon sense-overlapping	ENSMUST00000054666	Cirbp	chr10:80167840-80172786+
chr4	148575808	148576502	MACS_peak_125367	190.13	694	ENSMUST00000126897	Exosc10	190.13	4.73	14.43	Ensembl	1195	chr4:148568415-148576502+	exon sense-overlapping	ENSMUST00000017408	Exosc10	chr4:148558429-148582401+
chr17	33952220	33952591	MACS_peak_82816	190.04	371	ENSMUST00000174175	Rps18	190.04	4.72	7.97	Ensembl	632	chr17:33952000-33955660-	exon sense-overlapping	ENSMUST00000008812	Rps18	chr17:33951999-33955717-
chr7	15288250	15289190	MACS_peak_163503	189.05	940	ENSMUST00000184613	RP24-84K14.11	189.05	8.03	12.91	Ensembl	940	chr7:15288251-15289190-	intergenic	NA	NA	NA
chr5	118237077	118237596	MACS_peak_150073	188.89	519	ENSMUST00000144213	Rnft2	188.89	9.65	7.96	Ensembl	801	chr5:118236927-118242921-	exon sense-overlapping	ENSMUST00000117177	Rnft2	chr5:118190736-118244861-
chr15	81957605	81957910	MACS_peak_68453	188.67	305	ENSMUST00000147442	Pmm1	188.67	8.47	7.96	Ensembl	620	chr15:81957341-81960764-	exon sense-overlapping	ENSMUST00000023112	Pmm1	chr15:81951108-81960930-
chr17	33931210	33931634	MACS_peak_75124	188.49	424	ENSMUST00000173258	Rgl2	188.49	11.31	14.45	Ensembl	788	chr17:33931211-33932503+	exon sense-overlapping	ENSMUST00000047503	Rgl2	chr17:33929582-33937687+
chr1	172278534	172278994	MACS_peak_10833	188.47	460	ENSMUST00000131751	Atp1a2	188.47	4.47	14.46	Ensembl	3583	chr1:172274543-172298064-	exon sense-overlapping	ENSMUST00000085913	Atp1a2	chr1:172271709-172298064-
chr8	94405210	94405557	MACS_peak_168517	188.46	347	ENSMUST00000178107	Ap3s1-ps2	188.46	15.46	14.46	Ensembl	582	chr8:94405211-94405792+	intergenic	NA	NA	NA
chr14	54515302	54515658	MACS_peak_58366	188.23	356	ENSMUST00000138367	Prmt5	188.23	7.47	8	Ensembl	521	chr14:54514595-54515658-	exon sense-overlapping	ENSMUST00000023873	Prmt5	chr14:54507187-54517525-
chr8	14925049	14925417	MACS_peak_162852	187.29	368	ENSMUST00000160619	Arhgef10	187.29	8.04	14.5	Ensembl	3289	chr8:14911717-14928291+	exon sense-overlapping	ENSMUST00000084207	Arhgef10	chr8:14911663-15001085+
chr11	97138440	97139334	MACS_peak_32773	186.03	894	ENSMUST00000107613	Tbkbp1	186.03	6.98	13.07	Ensembl	2173	chr11:97138406-97150048-	exon sense-overlapping	ENSMUST00000066078	Tbkbp1	chr11:97136171-97149712-
chr8	84934923	84935319	MACS_peak_167665	185.35	396	ENSMUST00000128356	Mast1	185.35	13.97	14.52	Ensembl	635	chr8:84934924-84937344-	exon sense-overlapping	ENSMUST00000109741	Mast1	chr8:84911903-84937353-
chr11	54920760	54921074	MACS_peak_28073	184.96	314	ENSMUST00000132224	Tnip1	184.96	8.71	8.14	Ensembl	442	chr11:54918611-54921075-	exon sense-overlapping	ENSMUST00000018482	Tnip1	chr11:54910787-54962912-
chr2	40555751	40557116	MACS_peak_102528	184.4	1365	ENSMUST00000118928	Gm13456	184.4	6.06	13.18	Ensembl	1365	chr2:40555752-40557116+	intergenic	NA	NA	NA
chr4	42950350	42952256	MACS_peak_128905	183.14	1906	ENSMUST00000142332	Dnajb5	183.14	11.96	8.17	Ensembl	5052	chr4:42950351-42958732+	exon sense-overlapping	ENSMUST00000037872	Dnajb5	chr4:42949814-42959425+
chr19	5602192	5602867	MACS_peak_95007	183	675	ENSMUST00000127071	Rnaseh2c	183	8.37	8.16	Ensembl	869	chr19:5601887-5602867+	exon sense-overlapping	ENSMUST00000025864	Rnaseh2c	chr19:5601873-5603439+
chr11	87588717	87589186	MACS_peak_32224	182.98	469	ENSMUST00000140398	2022-09-04	182.98	17.35	8.16	Ensembl	900	chr11:87578412-87589186+	exon sense-overlapping	ENSMUST00000018544	2022-09-04	chr11:87581041-87590539+
chrX	7767242	7767684	MACS_peak_197689	182.64	442	ENSMUST00000143680	Tfe3	182.64	10.95	13.27	Ensembl	4717	chrX:7762697-7775201+	exon sense-overlapping	ENSMUST00000077680	Tfe3	chrX:7762658-7775202+
chr5	117285790	117286244	MACS_peak_149877	182.56	454	ENSMUST00000139913	Pebp1	182.56	3.5	8.16	Ensembl	571	chr5:117285791-117287525-	exon sense-overlapping	ENSMUST00000036951	Pebp1	chr5:117282651-117287625-
chr15	79429346	79430183	MACS_peak_61720	182.33	837	ENSMUST00000135583	Gm16059	182.33	5.6	14.59	Ensembl	3778	chr15:79427220-79431629+	natural antisense	ENSMUST00000117786	Csnk1e	chr15:79417856-79441999-
chr2	110040573	110041263	MACS_peak_107041	181.96	690	ENSMUST00000126990	Ccdc34	181.96	7.24	13.33	Ensembl	840	chr2:110021973-110041263+	exon sense-overlapping	ENSMUST00000028580	Ccdc34	chr2:110017817-110045316+
chr3	95133199	95133628	MACS_peak_119789	181.57	429	ENSMUST00000173527	Scnm1	181.57	5.31	13.36	Ensembl	774	chr3:95130293-95133939-	exon sense-overlapping	ENSMUST00000172572	Scnm1	chr3:95129536-95134011-
chr16	4769461	4769795	MACS_peak_71486	181.39	334	ENSMUST00000140187	Cdip1	181.39	5.58	8.19	Ensembl	3811	chr16:4766841-4771512-	exon sense-overlapping	ENSMUST00000004173	Cdip1	chr16:4765461-4789990-
chr5	114368341	114368669	MACS_peak_146435	181.37	328	ENSMUST00000132646	Kctd10	181.37	10.03	13.39	Ensembl	850	chr5:114366883-114368669-	exon sense-overlapping	ENSMUST00000001125	Kctd10	chr5:114365622-114380483-
chr11	60114694	60115168	MACS_peak_28627	181.14	474	ENSMUST00000130746	4930412M03Rik	181.14	9.85	8.19	Ensembl	1111	chr11:60112219-60115230-	intronic antisense	ENSMUST00000064190	Rai1	chr11:60105013-60199195+
chr7	144508128	144508973	MACS_peak_161650	180.75	845	ENSMUST00000183183	Ppfia1	180.75	14.06	14.66	Ensembl	928	chr7:144506212-144508973-	exon sense-overlapping	ENSMUST00000168134	Ppfia1	chr7:144476758-144553729-
chr4	107064586	107064938	MACS_peak_131169	180.51	352	ENSMUST00000138788	Mrpl37	180.51	8.54	13.42	Ensembl	876	chr4:107064396-107065357-	exon sense-overlapping	ENSMUST00000030365	Mrpl37	chr4:107055874-107066868-
chr11	102204430	102205631	MACS_peak_33867	180.12	1201	ENSMUST00000149087	Hdac5	180.12	8.18	8.19	Ensembl	5406	chr11:102195749-102218929-	exon sense-overlapping	ENSMUST00000008999	Hdac5	chr11:102195744-102230124-
chr15	83137827	83138522	MACS_peak_68641	179.98	695	ENSMUST00000150926	Poldip3	179.98	4.65	8.19	Ensembl	837	chr15:83137828-83149336-	exon sense-overlapping	ENSMUST00000058793	Poldip3	chr15:83125978-83149384-
chr11	108716482	108716818	MACS_peak_34532	179.78	336	ENSMUST00000118777	Gm11671	179.78	15.18	13.32	Ensembl	424	chr11:108716483-108716906+	intron sense-overlapping	ENSMUST00000061287	Cep112	chr11:108425266-108860614+
chr17	79012616	79013353	MACS_peak_86162	179.67	737	ENSMUST00000130070	Prkd3	179.67	10.94	8.2	Ensembl	3508	chr17:79010127-79020777-	exon sense-overlapping	ENSMUST00000003191	Prkd3	chr17:78949405-79013306-
chr5	65591595	65591975	MACS_peak_145281	179.67	380	ENSMUST00000146799	Ube2k	179.67	10.24	8.19	Ensembl	780	chr5:65591596-65595145+	exon sense-overlapping	ENSMUST00000122141	Ube2k	chr5:65537300-65596393+
chr2	166954899	166955310	MACS_peak_114716	179.61	411	ENSMUST00000142481	Stau1	179.61	5.05	8.19	Ensembl	3573	chr2:166948147-166955384-	exon sense-overlapping	ENSMUST00000049412	Stau1	chr2:166948147-166996103-
chr7	13053645	13054341	MACS_peak_163449	179.52	696	ENSMUST00000182293	Mzf1	179.52	14.74	13.31	Ensembl	3749	chr7:13043149-13054341-	exon sense-overlapping	ENSMUST00000069289	Mzf1	chr7:13042303-13054764-
chr9	113655817	113656207	MACS_peak_196283	179.18	390	ENSMUST00000142256	Pdcd6ip	179.18	5.95	13.34	Ensembl	847	chr9:113655570-113657294-	exon sense-overlapping	ENSMUST00000035086	Pdcd6ip	chr9:113651744-113708259-
chr5	31145683	31146060	MACS_peak_142874	178.94	377	ENSMUST00000149113	Mpv17	178.94	5.25	8.19	Ensembl	699	chr5:31141711-31146060-	exon sense-overlapping	ENSMUST00000067186	Mpv17	chr5:31141096-31154193-
chr3	51244842	51245753	MACS_peak_107457	178.8	911	ENSMUST00000144826	Ccrn4l	178.8	14.96	14.74	Ensembl	9797	chr3:51240206-51251624+	exon sense-overlapping	ENSMUST00000023849	Ccrn4l	chr3:51224447-51251644+
chr18	77563887	77564609	MACS_peak_93779	178.52	722	ENSMUST00000182294	Rnf165	178.52	9.7	8.2	Ensembl	2517	chr18:77562093-77564609-	exon sense-overlapping	ENSMUST00000182146	Rnf165	chr18:77563132-77565105-
chr10	105574550	105575382	MACS_peak_20347	178.3	832	NR_038032	Gm15663	178.3	14.09	14.77	RefSeq	3204	chr10:105574551-105583870+	bidirectional	ENSMUST00000061506	Tmtc2	chr10:105187663-105574435-
chr5	146575193	146576123	MACS_peak_139342	178.09	930	ENSMUST00000178171	Gm8494	178.09	9.39	14.8	Ensembl	930	chr5:146575194-146576123+	intergenic	NA	NA	NA
chr6	134233419	134233800	MACS_peak_164767	177.81	381	ENSMUST00000171098	Gm17089	177.81	12.88	8.2	Ensembl	1394	chr6:134233158-134243711-	natural antisense	ENSMUST00000081028	Etv6	chr6:134035700-134270158+
chr4	142146769	142147145	MACS_peak_124842	177.32	376	ENSMUST00000144611	Kazn	177.32	9.06	14.87	Ensembl	723	chr4:142146770-142154586-	exon sense-overlapping	ENSMUST00000036476	Kazn	chr4:142139240-142239401-
chr15	76765071	76765651	MACS_peak_61320	176.95	580	ENSMUST00000177255	Arhgap39	176.95	9.58	14.89	Ensembl	730	chr15:76765072-76818141-	exon sense-overlapping	ENSMUST00000036176	Arhgap39	chr15:76723985-76818083-
chr16	13130133	13130839	MACS_peak_72549	176.1	706	uc012abg.1	Ercc4	176.1	8.89	8.28	UCSC_knowngene	6585	chr16:13111731-13152009+	exon sense-overlapping	ENSMUST00000023206	Ercc4	chr16:13109684-13148734+
chr6	49263009	49264030	MACS_peak_158262	176.1	1021	uc009bwo.2	AK005187	176.1	5.39	8.28	UCSC_knowngene	3788	chr6:49260243-49264030-	exon sense-overlapping	ENSMUST00000031841	Tra2a	chr6:49243921-49264052-
chr8	122482287	122483855	MACS_peak_185027	176.05	1568	ENSMUST00000151855	Ctu2	176.05	10.08	13.47	Ensembl	3999	chr8:122476209-122484138+	exon sense-overlapping	ENSMUST00000116412	Ctu2	chr8:122476143-122483092+
chrX	38685725	38686277	MACS_peak_198533	175.8	552	ENSMUST00000101630	Ap3s1-ps1	175.8	12.07	13.47	Ensembl	760	chrX:38685518-38686277-	intergenic	NA	NA	NA
chr7	140857698	140858572	MACS_peak_178179	175.67	874	ENSMUST00000123925	Ric8	175.67	6.74	8.31	Ensembl	2272	chr7:140857699-140862959+	exon sense-overlapping	ENSMUST00000026558	Ric8	chr7:140856957-140863730+
chr5	8367021	8367361	MACS_peak_140745	175.48	340	ENSMUST00000143929	Adam22	175.48	5.09	8.34	Ensembl	705	chr5:8366942-8368160-	exon sense-overlapping	ENSMUST00000046838	Adam22	chr5:8092260-8368077-
chr15	97748582	97749546	MACS_peak_69205	175.4	964	ENSMUST00000123397	Rapgef3	175.4	6.13	13.53	Ensembl	4204	chr15:97746528-97767587-	exon sense-overlapping	ENSMUST00000126854	Rapgef3	chr15:97744770-97767846-
chr14	26459799	26460210	MACS_peak_56204	175.24	411	ENSMUST00000144737	Slmap	175.24	9.1	8.35	Ensembl	659	chr14:26459800-26463685-	exon sense-overlapping	ENSMUST00000038522	Slmap	chr14:26413175-26533740-
chr2	91055457	91055935	MACS_peak_105626	174.72	478	ENSMUST00000152269	Psmc3	174.72	7.46	13.55	Ensembl	925	chr2:91054095-91055935+	exon sense-overlapping	ENSMUST00000002171	Psmc3	chr2:91054055-91066369+
chr11	69969240	69969588	MACS_peak_29814	174.41	348	ENSMUST00000127437	Elp5	174.41	8.25	8.41	Ensembl	674	chr11:69969241-69980061-	exon sense-overlapping	ENSMUST00000108594	Elp5	chr11:69968224-69981252-
chr10	79854350	79854971	MACS_peak_19754	174.41	621	NR_029447	E130317F20Rik	174.41	7.11	13.57	RefSeq	3595	chr10:79851377-79854971-	natural antisense	ENSMUST00000095457	Ptbp1	chr10:79854668-79864359+
chr2	132808203	132809016	MACS_peak_109226	173.91	813	ENSMUST00000152836	Trmt6	173.91	8.43	13.62	Ensembl	4153	chr2:132804207-132810635-	exon sense-overlapping	ENSMUST00000039554	Trmt6	chr2:132804207-132816054-
chr16	18222242	18223541	MACS_peak_73219	173.83	1299	uc029swk.1	Zdhhc8	173.83	7.14	8.47	UCSC_knowngene	1299	chr16:18222243-18223541-	exon sense-overlapping	ENSMUST00000076957	Zdhhc8	chr16:18220754-18235136-
chr16	18437501	18437812	MACS_peak_73287	173.67	311	ENSMUST00000131303	Txnrd2	173.67	18.76	8.48	Ensembl	482	chr16:18426512-18437812+	exon sense-overlapping	ENSMUST00000115604	Txnrd2	chr16:18426433-18456468+
chr5	33746049	33746374	MACS_peak_129229	173.56	325	ENSMUST00000149886	Letm1	173.56	4.45	15.08	Ensembl	3056	chr5:33742534-33753562-	exon sense-overlapping	ENSMUST00000005431	Letm1	chr5:33739673-33782817-
chr2	30825259	30825761	MACS_peak_102878	173.37	502	ENSMUST00000144330	Asb6	173.37	9.18	8.48	Ensembl	1000	chr2:30825156-30828291-	exon sense-overlapping	ENSMUST00000041726	Asb6	chr2:30823097-30830333-
chr2	156533506	156533867	MACS_peak_113249	173.31	361	ENSMUST00000137067	Epb4.1l1	173.31	11.41	8.49	Ensembl	820	chr2:156533507-156539986+	exon sense-overlapping	ENSMUST00000029155	Epb4.1l1	chr2:156475837-156543214+
chr9	108508382	108509224	MACS_peak_195746	173	842	ENSMUST00000141201	Qars	173	5.58	13.67	Ensembl	2615	chr9:108508058-108511071+	exon sense-overlapping	ENSMUST00000006838	Qars	chr9:108508005-108515941+
chr12	90331484	90332503	MACS_peak_43901	172.41	1019	uc007oka.1	Nrxn3	172.41	9.2	8.44	UCSC_knowngene	6280	chr12:88722876-90333465+	exon sense-overlapping	ENSMUST00000057634	Nrxn3	chr12:88953399-90333060+
chr15	89427114	89428015	MACS_peak_63115	172.28	901	ENSMUST00000165623	Chkb	172.28	6.71	15.2	Ensembl	2455	chr15:89427115-89429908-	exon sense-overlapping	ENSMUST00000023289	Chkb	chr15:89426367-89429899-
chr2	32011184	32011562	MACS_peak_93327	172.11	378	ENSMUST00000130185	Nup214	172.11	14.32	15.2	Ensembl	629	chr2:32010269-32011642+	exon sense-overlapping	ENSMUST00000065398	Nup214	chr2:31974436-32052371+
chr4	49059272	49059617	MACS_peak_127347	171.52	345	ENSMUST00000137884	E130309F12Rik	171.52	6.66	13.74	Ensembl	2558	chr4:49059273-49208600+	exon sense-overlapping	ENSMUST00000076670	E130309F12Rik	chr4:49059282-49340259+
chr11	88362734	88363947	MACS_peak_32335	171	1213	ENSMUST00000143208	Gm15893	171	7.39	8.45	Ensembl	1559	chr11:88356291-88363947+	intronic antisense	ENSMUST00000092794	Msi2	chr11:88343889-88718101-
chr14	69415608	69416015	MACS_peak_59773	170.86	407	uc029slk.1	Loxl2	170.86	10.64	8.46	UCSC_knowngene	2836	chr14:69390793-69480287+	natural antisense	ENSMUST00000179116	Gm21464	chr14:69462309-69503362-
chr11	54746356	54746733	MACS_peak_28050	170.83	377	ENSMUST00000120487	Gm12229	170.83	8.24	8.47	Ensembl	468	chr11:54746357-54746824-	intron sense-overlapping	ENSMUST00000064104	Cdc42se2	chr11:54717456-54787675-
chr1	30948996	30949308	MACS_peak_1529	170.8	312	ENSMUST00000124445	Ptp4a1	170.8	12.97	8.47	Ensembl	686	chr1:30946266-30949308-	exon sense-overlapping	ENSMUST00000027232	Ptp4a1	chr1:30940303-30949770-
chr19	41946244	41947103	MACS_peak_98094	170.22	859	ENSMUST00000167927	Mms19	170.22	8.35	8.51	Ensembl	7875	chr19:41941086-41981114-	exon sense-overlapping	ENSMUST00000026168	Mms19	chr19:41944377-41981132-
chr7	19389769	19390991	MACS_peak_167113	170.16	1222	ENSMUST00000180691	Gm26852	170.16	12.47	8.51	Ensembl	5751	chr7:19382220-19392718-	natural antisense	ENSMUST00000062831	Ercc2	chr7:19382010-19395694+
chr4	33030856	33031323	MACS_peak_128089	169.72	467	NR_036602	4933421O10Rik	169.72	9.63	8.56	RefSeq	3850	chr4:33027139-33031323-	bidirectional	ENSMUST00000029944	Ube2j1	chr4:33031528-33045199+
chr10	45707477	45707838	MACS_peak_16966	169.35	361	ENSMUST00000155368	Hace1	169.35	11.38	8.57	Ensembl	10257	chr10:45677117-45712271+	exon sense-overlapping	ENSMUST00000037044	Hace1	chr10:45577829-45712345+
chr7	44844843	44845173	MACS_peak_152914	169.34	330	ENSMUST00000153161	Tbc1d17	169.34	7.85	15.31	Ensembl	835	chr7:44844577-44846000-	exon sense-overlapping	ENSMUST00000047085	Tbc1d17	chr7:44841025-44849075-
chr7	100459415	100460235	MACS_peak_174119	169.21	820	ENSMUST00000184420	RP23-308M1.2	169.21	13.88	8.58	Ensembl	4520	chr7:100459416-100467190-	intronic antisense	ENSMUST00000098259	C2cd3	chr7:100372233-100469461+
chr16	13685061	13685574	MACS_peak_71416	169.08	513	ENSMUST00000132349	Bfar	169.08	10.03	13.87	Ensembl	572	chr16:13672062-13685616+	exon sense-overlapping	ENSMUST00000023365	Bfar	chr16:13671858-13703612+
chr11	78512387	78512805	MACS_peak_30735	168.92	418	ENSMUST00000136284	Poldip2	168.92	8.38	13.86	Ensembl	479	chr11:78512388-78513980+	exon sense-overlapping	ENSMUST00000001127	Poldip2	chr11:78512193-78522736+
chr11	104322228	104322540	MACS_peak_34202	168.85	312	ENSMUST00000126820	Mapt	168.85	5	8.6	Ensembl	831	chr11:104321949-104328210+	exon sense-overlapping	ENSMUST00000100347	Mapt	chr11:104231584-104328219+
chr6	91517047	91517352	MACS_peak_158298	168.53	305	ENSMUST00000123569	Lsm3	168.53	6.9	13.87	Ensembl	466	chr6:91516047-91517481+	exon sense-overlapping	ENSMUST00000040607	Lsm3	chr6:91515928-91522625+
chr8	22665488	22665911	MACS_peak_177127	168.53	423	ENSMUST00000135326	Ikbkb	168.53	10.74	13.87	Ensembl	3705	chr8:22659213-22706534-	exon sense-overlapping	ENSMUST00000033939	Ikbkb	chr8:22659212-22706578-
chr13	55624710	55625248	MACS_peak_49362	168.52	538	ENSMUST00000169228	Caml	168.52	5.28	13.87	Ensembl	597	chr13:55623198-55625248+	exon sense-overlapping	ENSMUST00000021963	Caml	chr13:55623005-55632411+
chr7	57792127	57792629	MACS_peak_166937	168.16	502	ENSMUST00000136033	Gabrb3	168.16	12.74	13.85	Ensembl	696	chr7:57792128-57816315+	exon sense-overlapping	ENSMUST00000039697	Gabrb3	chr7:57591162-57828802+
[truncated: 735 more rows]

## Sheet: OGDR3h-m1A_lncRNA
Chromosome	Transcript start	Transcript end	Peak ID	Score	Peak length	Transcript ID	Gene mame	P value (-log10)	Fold Enrichment	FDR	Source	RNA length	Coordinates	Relationship	Transcript ID	Associated gene name	Associated gene coordinates
[truncated: 1,294 more rows]
