# Supplementary material for: The landscape of m1A modification and its posttranscriptional regulatory functions in primary neurons
Source: eLife. 2023 Mar 7;12:e85324. doi: 10.7554/eLife.85324 (PMC9991057; doi:10.7554/eLife.85324)
Supplement: Figure 3—source data 2. [file elife-85324-fig3-data2.xlsx]

## Sheet: Down-OGDR1.5h_vs_control
Chromosome	Transcript start	Transcript end	Peak ID	Score	Peak length	Transcript ID	Gene mame	Fold change	P value	FDR	Regulation	Source	RNA length	Coordinates	Relationship	Associated gene ID	Associated gene name	Associated gene coordinates
chr10	108636550	108636920	diffreps_peak_00016016	6.1846	370	ENSMUST00000147593	Syt1	-3.05825	6.53736e-07	2.27026e-05	down	Ensembl	717	chr10:108627286-108636964-	exon sense-overlapping	ENSMUST00000156979	Syt1	chr10:108627342-109009111-
chr19	8845781	8846100	diffreps_peak_00071728	5.62929	319	ENSMUST00000159571	Bscl2	-4.25953	2.34805e-06	6.26452e-05	down	Ensembl	2806	chr19:8839373-8848667+	exon sense-overlapping	ENSMUST00000171649	Bscl2	chr19:8837467-8848683+
chr10	69990801	69991340	diffreps_peak_00012881	5.98311	539	uc007fnn.1	Ank3	-2.15806	1.03965e-06	3.26617e-05	down	UCSC_knowngene	7274	chr10:69989935-70027436+	exon sense-overlapping	ENSMUST00000182437	Ank3	chr10:69926133-70023995+
chr19	57323601	57324062	diffreps_peak_00074631	7.0516	461	NR_040316	B230217O12Rik	-4.77866	8.8798e-08	4.78698e-06	down	RefSeq	1954	chr19:57323197-57360899-	bidirectional	uc008iac.2	Fam160b1	chr19:57361009-57389594+
chr11	120466653	120467421	diffreps_peak_00028684	6.37893	768	ENSMUST00000128824	Arl16	-2.67093	4.17897e-07	1.59892e-05	down	Ensembl	938	chr11:120465768-120467421-	exon sense-overlapping	ENSMUST00000076921	Arl16	chr11:120465438-120467600-
chr10	108636550	108636920	diffreps_peak_00016016	6.1846	370	ENSMUST00000147593	Syt1	-3.05825	6.53736e-07	2.27026e-05	down	Ensembl	717	chr10:108627286-108636964-	exon sense-overlapping	NM_001252341	Syt1	chr10:108497650-109010975-
chr1	21960561	21961000	diffreps_peak_00000698	6.41277	439	ENSMUST00000181002	Gm26580	-3.73741	3.86574e-07	1.50539e-05	down	Ensembl	2095	chr1:21959842-21962530+	natural antisense	NM_023872	Kcnq5	chr1:21398403-21961942-
chr10	69990801	69991340	diffreps_peak_00012881	5.98311	539	uc007fnn.1	Ank3	-2.15806	1.03965e-06	3.26617e-05	down	UCSC_knowngene	7274	chr10:69989935-70027436+	exon sense-overlapping	ENSMUST00000182207	Ank3	chr10:69980323-70024882+
chr13	83524855	83525360	diffreps_peak_00038758	7.22217	505	uc007rig.1	AK043267	-2.54222	5.99553e-08	3.57348e-06	down	UCSC_knowngene	2484	chr13:83524856-83527339+	intron sense-overlapping	ENSMUST00000005722	Mef2c	chr13:83504034-83667079+
chr2	30955461	30955860	diffreps_peak_00077084	6.19109	399	ENSMUST00000133544	Tor1b	-4.37178	6.44033e-07	2.24471e-05	down	Ensembl	4775	chr2:30952979-30959011+	exon sense-overlapping	ENSMUST00000028199	Tor1b	chr2:30952959-30959015+
chr10	108636550	108636920	diffreps_peak_00016016	6.1846	370	ENSMUST00000147593	Syt1	-3.05825	6.53736e-07	2.27026e-05	down	Ensembl	717	chr10:108627286-108636964-	exon sense-overlapping	NM_009306	Syt1	chr10:108497650-109010975-
chr9	47799159	47799460	diffreps_peak_00147757	5.8985	301	NR_046048	Gm10677	-2.45324	1.26327e-06	3.81828e-05	down	RefSeq	2102	chr9:47799160-47818208-	natural antisense	NM_001025600	Cadm1	chr9:47530352-47853385+
chr10	69990801	69991340	diffreps_peak_00012881	5.98311	539	uc007fnn.1	Ank3	-2.15806	1.03965e-06	3.26617e-05	down	UCSC_knowngene	7274	chr10:69989935-70027436+	exon sense-overlapping	ENSMUST00000092432	Ank3	chr10:69534222-70015633+
chr9	47799159	47799460	diffreps_peak_00147757	5.8985	301	NR_046048	Gm10677	-2.45324	1.26327e-06	3.81828e-05	down	RefSeq	2102	chr9:47799160-47818208-	natural antisense	ENSMUST00000114547	Cadm1	chr9:47530257-47853380+
chr9	47799159	47799460	diffreps_peak_00147757	5.8985	301	NR_046048	Gm10677	-2.45324	1.26327e-06	3.81828e-05	down	RefSeq	2102	chr9:47799160-47818208-	natural antisense	NM_207675	Cadm1	chr9:47530352-47853385+
chr1	21960561	21961000	diffreps_peak_00000698	6.41277	439	ENSMUST00000181002	Gm26580	-3.73741	3.86574e-07	1.50539e-05	down	Ensembl	2095	chr1:21959842-21962530+	natural antisense	ENSMUST00000029667	Kcnq5	chr1:21398403-21961581-
chr4	41773735	41774169	diffreps_peak_00095641	8.75051	434	ENSMUST00000130197	Ccl27a	-2.76575	1.77618e-09	3.17268e-07	down	Ensembl	657	chr4:41773188-41774169-	exon sense-overlapping	NM_001164044	Ccl27a	chr4:41772895-41774176-
chr19	57323601	57324062	diffreps_peak_00074631	7.0516	461	NR_040316	B230217O12Rik	-4.77866	8.8798e-08	4.78698e-06	down	RefSeq	1954	chr19:57323197-57360899-	bidirectional	ENSMUST00000036407	Fam160b1	chr19:57361009-57389594+
chr19	6408301	6408640	diffreps_peak_00071296	6.76534	339	ENSMUST00000152022	Rasgrp2	-3.56943	1.71655e-07	7.96215e-06	down	Ensembl	8815	chr19:6404827-6414041+	exon sense-overlapping	ENSMUST00000035716	Rasgrp2	chr19:6400562-6415216+
chr19	8845781	8846100	diffreps_peak_00071728	5.62929	319	ENSMUST00000159571	Bscl2	-4.25953	2.34805e-06	6.26452e-05	down	Ensembl	2806	chr19:8839373-8848667+	exon sense-overlapping	NM_001136064	Bscl2	chr19:8837467-8848683+
chr9	47799159	47799460	diffreps_peak_00147757	5.8985	301	NR_046048	Gm10677	-2.45324	1.26327e-06	3.81828e-05	down	RefSeq	2102	chr9:47799160-47818208-	natural antisense	ENSMUST00000114548	Cadm1	chr9:47530173-47853385+
chr9	47799159	47799460	diffreps_peak_00147757	5.8985	301	NR_046048	Gm10677	-2.45324	1.26327e-06	3.81828e-05	down	RefSeq	2102	chr9:47799160-47818208-	natural antisense	NM_018770	Cadm1	chr9:47530352-47853385+
chr11	120466653	120467421	diffreps_peak_00028684	6.37893	768	ENSMUST00000128824	Arl16	-2.67093	4.17897e-07	1.59892e-05	down	Ensembl	938	chr11:120465768-120467421-	exon sense-overlapping	NM_197995	Arl16	chr11:120464326-120467600-
chr19	8845781	8846100	diffreps_peak_00071728	5.62929	319	ENSMUST00000159571	Bscl2	-4.25953	2.34805e-06	6.26452e-05	down	Ensembl	2806	chr19:8839373-8848667+	exon sense-overlapping	NM_001290823	Bscl2	chr19:8840503-8848683+
chr3	79648681	79649000	diffreps_peak_00089634	8.22894	319	ENSMUST00000182491	Rxfp1	-108.3	5.90288e-09	7.14938e-07	down	Ensembl	4983	chr3:79644112-79737880-	exon sense-overlapping	ENSMUST00000183040	Rxfp1	chr3:79655293-79667853-
chr4	41773735	41774169	diffreps_peak_00095641	8.75051	434	ENSMUST00000130197	Ccl27a	-2.76575	1.77618e-09	3.17268e-07	down	Ensembl	657	chr4:41773188-41774169-	exon sense-overlapping	NM_001048179	Ccl27a	chr4:41769470-41774134-
chr13	83524855	83525360	diffreps_peak_00038758	7.22217	505	uc007rig.1	AK043267	-2.54222	5.99553e-08	3.57348e-06	down	UCSC_knowngene	2484	chr13:83524856-83527339+	intron sense-overlapping	ENSMUST00000163888	Mef2c	chr13:83504034-83667079+
chr12	109559541	109559940	diffreps_peak_00034326	5.54756	399	NR_003633	Meg3	-2.70569	2.83425e-06	7.30125e-05	down	RefSeq	11488	chr12:109545398-109568650+	intergenic	NA	NA	NA
chr4	142143293	142143620	diffreps_peak_00103298	7.31795	327	ENSMUST00000148812	Kazn	-3.07066	4.80891e-08	3.05858e-06	down	Ensembl	5725	chr4:142139244-142146465-	exon sense-overlapping	ENSMUST00000172864	Kazn	chr4:142140808-142210206-
chr5	29752396	29752738	diffreps_peak_00106458	6.29093	342	ENSMUST00000151976	Dnajb6	-2.87072	5.1176e-07	1.87174e-05	down	Ensembl	668	chr5:29750722-29752738+	exon sense-overlapping	NM_001127367	Dnajb6	chr5:29735898-29767101+
chr9	47799159	47799460	diffreps_peak_00147757	5.8985	301	NR_046048	Gm10677	-2.45324	1.26327e-06	3.81828e-05	down	RefSeq	2102	chr9:47799160-47818208-	natural antisense	ENSMUST00000085909	Cadm1	chr9:47530257-47851029+
chr4	142143293	142143620	diffreps_peak_00103298	7.31795	327	ENSMUST00000148812	Kazn	-3.07066	4.80891e-08	3.05858e-06	down	Ensembl	5725	chr4:142139244-142146465-	exon sense-overlapping	ENSMUST00000036476	Kazn	chr4:142139240-142239401-
chr10	69990801	69991340	diffreps_peak_00012881	5.98311	539	uc007fnn.1	Ank3	-2.15806	1.03965e-06	3.26617e-05	down	UCSC_knowngene	7274	chr10:69989935-70027436+	exon sense-overlapping	ENSMUST00000182439	Ank3	chr10:69534208-70023866+
chr10	69990801	69991340	diffreps_peak_00012881	5.98311	539	uc007fnn.1	Ank3	-2.15806	1.03965e-06	3.26617e-05	down	UCSC_knowngene	7274	chr10:69989935-70027436+	exon sense-overlapping	ENSMUST00000182269	Ank3	chr10:69925773-70024882+
chr10	108636550	108636920	diffreps_peak_00016016	6.1846	370	ENSMUST00000147593	Syt1	-3.05825	6.53736e-07	2.27026e-05	down	Ensembl	717	chr10:108627286-108636964-	exon sense-overlapping	ENSMUST00000064054	Syt1	chr10:108497652-109010982-
chr10	69990801	69991340	diffreps_peak_00012881	5.98311	539	uc007fnn.1	Ank3	-2.15806	1.03965e-06	3.26617e-05	down	UCSC_knowngene	7274	chr10:69989935-70027436+	exon sense-overlapping	NM_170689	Ank3	chr10:69533708-70027436+
chr5	29752396	29752738	diffreps_peak_00106458	6.29093	342	ENSMUST00000151976	Dnajb6	-2.87072	5.1176e-07	1.87174e-05	down	Ensembl	668	chr5:29750722-29752738+	exon sense-overlapping	ENSMUST00000114839	Dnajb6	chr5:29735940-29767103+
chr3	63980841	63981200	diffreps_peak_00089187	5.389	359	ENSMUST00000163074	Gmps	-5.74503	4.08323e-06	9.81312e-05	down	Ensembl	3418	chr3:63976210-63983452+	exon sense-overlapping	NM_001033300	Gmps	chr3:63976143-64019078+
chr10	69990801	69991340	diffreps_peak_00012881	5.98311	539	uc007fnn.1	Ank3	-2.15806	1.03965e-06	3.26617e-05	down	UCSC_knowngene	7274	chr10:69989935-70027436+	exon sense-overlapping	NM_009670	Ank3	chr10:69925532-70027436+
chr5	29752396	29752738	diffreps_peak_00106458	6.29093	342	ENSMUST00000151976	Dnajb6	-2.87072	5.1176e-07	1.87174e-05	down	Ensembl	668	chr5:29750722-29752738+	exon sense-overlapping	NM_001037941	Dnajb6	chr5:29735898-29757968+
chr10	69990801	69991340	diffreps_peak_00012881	5.98311	539	uc007fnn.1	Ank3	-2.15806	1.03965e-06	3.26617e-05	down	UCSC_knowngene	7274	chr10:69989935-70027436+	exon sense-overlapping	NM_170688	Ank3	chr10:69533708-70027436+
chr5	29752396	29752738	diffreps_peak_00106458	6.29093	342	ENSMUST00000151976	Dnajb6	-2.87072	5.1176e-07	1.87174e-05	down	Ensembl	668	chr5:29750722-29752738+	exon sense-overlapping	ENSMUST00000012734	Dnajb6	chr5:29735995-29757969+
chr19	6408301	6408640	diffreps_peak_00071296	6.76534	339	ENSMUST00000152022	Rasgrp2	-3.56943	1.71655e-07	7.96215e-06	down	Ensembl	8815	chr19:6404827-6414041+	exon sense-overlapping	NM_011242	Rasgrp2	chr19:6400583-6415216+
chr19	57323601	57324062	diffreps_peak_00074631	7.0516	461	NR_040316	B230217O12Rik	-4.77866	8.8798e-08	4.78698e-06	down	RefSeq	1954	chr19:57323197-57360899-	bidirectional	uc012bny.1	Fam160b1	chr19:57361009-57389594+
chr10	69990801	69991340	diffreps_peak_00012881	5.98311	539	uc007fnn.1	Ank3	-2.15806	1.03965e-06	3.26617e-05	down	UCSC_knowngene	7274	chr10:69989935-70027436+	exon sense-overlapping	ENSMUST00000092434	Ank3	chr10:69534222-70015633+
chr1	21960561	21961000	diffreps_peak_00000698	6.41277	439	ENSMUST00000181002	Gm26580	-3.73741	3.86574e-07	1.50539e-05	down	Ensembl	2095	chr1:21959842-21962530+	natural antisense	ENSMUST00000173058	Kcnq5	chr1:21402163-21961581-
chr4	142143293	142143620	diffreps_peak_00103298	7.31795	327	ENSMUST00000148812	Kazn	-3.07066	4.80891e-08	3.05858e-06	down	Ensembl	5725	chr4:142139244-142146465-	exon sense-overlapping	ENSMUST00000155023	Kazn	chr4:142102390-142210206-
chr19	8845781	8846100	diffreps_peak_00071728	5.62929	319	ENSMUST00000159571	Bscl2	-4.25953	2.34805e-06	6.26452e-05	down	Ensembl	2806	chr19:8839373-8848667+	exon sense-overlapping	ENSMUST00000160556	Bscl2	chr19:8839328-8848666+
chr10	69990801	69991340	diffreps_peak_00012881	5.98311	539	uc007fnn.1	Ank3	-2.15806	1.03965e-06	3.26617e-05	down	UCSC_knowngene	7274	chr10:69989935-70027436+	exon sense-overlapping	NM_170690	Ank3	chr10:69533708-70027436+
chr10	69990801	69991340	diffreps_peak_00012881	5.98311	539	uc007fnn.1	Ank3	-2.15806	1.03965e-06	3.26617e-05	down	UCSC_knowngene	7274	chr10:69989935-70027436+	exon sense-overlapping	ENSMUST00000182884	Ank3	chr10:69533772-70027438+
chr19	6408301	6408640	diffreps_peak_00071296	6.76534	339	ENSMUST00000152022	Rasgrp2	-3.56943	1.71655e-07	7.96215e-06	down	Ensembl	8815	chr19:6404827-6414041+	exon sense-overlapping	ENSMUST00000167240	Rasgrp2	chr19:6400583-6415215+
chr10	69990801	69991340	diffreps_peak_00012881	5.98311	539	uc007fnn.1	Ank3	-2.15806	1.03965e-06	3.26617e-05	down	UCSC_knowngene	7274	chr10:69989935-70027436+	exon sense-overlapping	NM_170730	Ank3	chr10:69533708-70027436+
chr9	47799159	47799460	diffreps_peak_00147757	5.8985	301	NR_046048	Gm10677	-2.45324	1.26327e-06	3.81828e-05	down	RefSeq	2102	chr9:47799160-47818208-	natural antisense	NM_207676	Cadm1	chr9:47530352-47853385+
chr10	69990801	69991340	diffreps_peak_00012881	5.98311	539	uc007fnn.1	Ank3	-2.15806	1.03965e-06	3.26617e-05	down	UCSC_knowngene	7274	chr10:69989935-70027436+	exon sense-overlapping	ENSMUST00000183148	Ank3	chr10:69533847-70024882+
chr4	41773735	41774169	diffreps_peak_00095641	8.75051	434	ENSMUST00000130197	Ccl27a	-2.76575	1.77618e-09	3.17268e-07	down	Ensembl	657	chr4:41773188-41774169-	exon sense-overlapping	ENSMUST00000173865	Ccl27a	chr4:41772895-41774101-
chr10	69990801	69991340	diffreps_peak_00012881	5.98311	539	uc007fnn.1	Ank3	-2.15806	1.03965e-06	3.26617e-05	down	UCSC_knowngene	7274	chr10:69989935-70027436+	exon sense-overlapping	ENSMUST00000047061	Ank3	chr10:69534222-70015633+
chr10	69990801	69991340	diffreps_peak_00012881	5.98311	539	uc007fnn.1	Ank3	-2.15806	1.03965e-06	3.26617e-05	down	UCSC_knowngene	7274	chr10:69989935-70027436+	exon sense-overlapping	ENSMUST00000182972	Ank3	chr10:69898131-70023921+
chr4	142143293	142143620	diffreps_peak_00103298	7.31795	327	ENSMUST00000148812	Kazn	-3.07066	4.80891e-08	3.05858e-06	down	Ensembl	5725	chr4:142139244-142146465-	exon sense-overlapping	NM_001109684	Kazn	chr4:142139240-142210208-
chr19	8845781	8846100	diffreps_peak_00071728	5.62929	319	ENSMUST00000159571	Bscl2	-4.25953	2.34805e-06	6.26452e-05	down	Ensembl	2806	chr19:8839373-8848667+	exon sense-overlapping	NM_008144	Bscl2	chr19:8839328-8848683+
chr4	41773735	41774169	diffreps_peak_00095641	8.75051	434	ENSMUST00000130197	Ccl27a	-2.76575	1.77618e-09	3.17268e-07	down	Ensembl	657	chr4:41773188-41774169-	exon sense-overlapping	NM_001164045	Ccl27a	chr4:41772895-41774101-
chr1	21960561	21961000	diffreps_peak_00000698	6.41277	439	ENSMUST00000181002	Gm26580	-3.73741	3.86574e-07	1.50539e-05	down	Ensembl	2095	chr1:21959842-21962530+	natural antisense	ENSMUST00000115300	Kcnq5	chr1:21398408-21961942-
chr13	54765241	54765692	diffreps_peak_00037589	7.37437	451	ENSMUST00000138067	Sncb	-2.30886	4.22308e-08	2.80163e-06	down	Ensembl	822	chr13:54765059-54766492-	exon sense-overlapping	ENSMUST00000036825	Sncb	chr13:54758860-54766595-
chr19	8845781	8846100	diffreps_peak_00071728	5.62929	319	ENSMUST00000159571	Bscl2	-4.25953	2.34805e-06	6.26452e-05	down	Ensembl	2806	chr19:8839373-8848667+	exon sense-overlapping	ENSMUST00000086058	Bscl2	chr19:8840519-8848666+
chr10	69990801	69991340	diffreps_peak_00012881	5.98311	539	uc007fnn.1	Ank3	-2.15806	1.03965e-06	3.26617e-05	down	UCSC_knowngene	7274	chr10:69989935-70027436+	exon sense-overlapping	NM_170728	Ank3	chr10:69533708-70027436+
chr4	142143293	142143620	diffreps_peak_00103298	7.31795	327	ENSMUST00000148812	Kazn	-3.07066	4.80891e-08	3.05858e-06	down	Ensembl	5725	chr4:142139244-142146465-	exon sense-overlapping	ENSMUST00000129032	Kazn	chr4:142139243-142210108-
chr10	69990801	69991340	diffreps_peak_00012881	5.98311	539	uc007fnn.1	Ank3	-2.15806	1.03965e-06	3.26617e-05	down	UCSC_knowngene	7274	chr10:69989935-70027436+	exon sense-overlapping	ENSMUST00000182029	Ank3	chr10:69925805-70015805+
chr9	47799159	47799460	diffreps_peak_00147757	5.8985	301	NR_046048	Gm10677	-2.45324	1.26327e-06	3.81828e-05	down	RefSeq	2102	chr9:47799160-47818208-	natural antisense	ENSMUST00000034581	Cadm1	chr9:47530373-47850390+
chr10	69990801	69991340	diffreps_peak_00012881	5.98311	539	uc007fnn.1	Ank3	-2.15806	1.03965e-06	3.26617e-05	down	UCSC_knowngene	7274	chr10:69989935-70027436+	exon sense-overlapping	ENSMUST00000183169	Ank3	chr10:69533847-70024882+
chr10	69990801	69991340	diffreps_peak_00012881	5.98311	539	uc007fnn.1	Ank3	-2.15806	1.03965e-06	3.26617e-05	down	UCSC_knowngene	7274	chr10:69989935-70027436+	exon sense-overlapping	ENSMUST00000182692	Ank3	chr10:69925495-70023957+
chr4	142143293	142143620	diffreps_peak_00103298	7.31795	327	ENSMUST00000148812	Kazn	-3.07066	4.80891e-08	3.05858e-06	down	Ensembl	5725	chr4:142139244-142146465-	exon sense-overlapping	ENSMUST00000173068	Kazn	chr4:142118233-142159054-
chr10	69990801	69991340	diffreps_peak_00012881	5.98311	539	uc007fnn.1	Ank3	-2.15806	1.03965e-06	3.26617e-05	down	UCSC_knowngene	7274	chr10:69989935-70027436+	exon sense-overlapping	ENSMUST00000182992	Ank3	chr10:69706370-70015631+
chr5	29752396	29752738	diffreps_peak_00106458	6.29093	342	ENSMUST00000151976	Dnajb6	-2.87072	5.1176e-07	1.87174e-05	down	Ensembl	668	chr5:29750722-29752738+	exon sense-overlapping	NM_001037940	Dnajb6	chr5:29735898-29786478+
chr18	82338773	82339130	diffreps_peak_00070290	9.06499	357	ENSMUST00000078739	Gm17383	-6.28007	8.61016e-10	1.91997e-07	down	Ensembl	1041	chr18:82338774-82339816+	intergenic	NA	NA	NA
chr12	61523149	61523760	diffreps_peak_00031176	5.8118	611	ENSMUST00000130887	Lrfn5	-2.58727	1.54241e-06	4.46884e-05	down	Ensembl	1724	chr12:61523150-61605008+	exon sense-overlapping	NM_178714	Lrfn5	chr12:61524632-61845258+
chr10	69990801	69991340	diffreps_peak_00012881	5.98311	539	uc007fnn.1	Ank3	-2.15806	1.03965e-06	3.26617e-05	down	UCSC_knowngene	7274	chr10:69989935-70027436+	exon sense-overlapping	ENSMUST00000183023	Ank3	chr10:69987849-70024628+
chr13	54765241	54765692	diffreps_peak_00037589	7.37437	451	ENSMUST00000138067	Sncb	-2.30886	4.22308e-08	2.80163e-06	down	Ensembl	822	chr13:54765059-54766492-	exon sense-overlapping	NM_033610	Sncb	chr13:54758860-54766440-
chr12	109560721	109562540	diffreps_peak_00034328	7.27673	1819	NR_003633	Meg3	-2.39245	5.28777e-08	3.28285e-06	down	RefSeq	11488	chr12:109545398-109568650+	intergenic	NA	NA	NA
chr10	69990801	69991340	diffreps_peak_00012881	5.98311	539	uc007fnn.1	Ank3	-2.15806	1.03965e-06	3.26617e-05	down	UCSC_knowngene	7274	chr10:69989935-70027436+	exon sense-overlapping	ENSMUST00000182155	Ank3	chr10:69533843-70024626+
chr6	40252761	40253140	diffreps_peak_00118323	5.66508	379	ENSMUST00000180588	Tmem178b	-2.46291	2.16231e-06	5.87608e-05	down	Ensembl	6250	chr6:40248901-40255150+	exon sense-overlapping	ENSMUST00000180886	Tmem178b	chr6:39873271-40255075+
chr4	41773735	41774169	diffreps_peak_00095641	8.75051	434	ENSMUST00000130197	Ccl27a	-2.76575	1.77618e-09	3.17268e-07	down	Ensembl	657	chr4:41773188-41774169-	exon sense-overlapping	ENSMUST00000108037	Ccl27a	chr4:41769467-41774142-
chr4	142143293	142143620	diffreps_peak_00103298	7.31795	327	ENSMUST00000148812	Kazn	-3.07066	4.80891e-08	3.05858e-06	down	Ensembl	5725	chr4:142139244-142146465-	exon sense-overlapping	NM_144531	Kazn	chr4:142102390-142210208-
chr3	79648681	79649000	diffreps_peak_00089634	8.22894	319	ENSMUST00000182491	Rxfp1	-108.3	5.90288e-09	7.14938e-07	down	Ensembl	4983	chr3:79644112-79737880-	exon sense-overlapping	NM_212452	Rxfp1	chr3:79644716-79737794-
chr10	108636550	108636920	diffreps_peak_00016016	6.1846	370	ENSMUST00000147593	Syt1	-3.05825	6.53736e-07	2.27026e-05	down	Ensembl	717	chr10:108627286-108636964-	exon sense-overlapping	NM_001252342	Syt1	chr10:108497650-109010975-
chr4	142143293	142143620	diffreps_peak_00103298	7.31795	327	ENSMUST00000148812	Kazn	-3.07066	4.80891e-08	3.05858e-06	down	Ensembl	5725	chr4:142139244-142146465-	exon sense-overlapping	NM_001109685	Kazn	chr4:142139240-142239401-
chr10	69990801	69991340	diffreps_peak_00012881	5.98311	539	uc007fnn.1	Ank3	-2.15806	1.03965e-06	3.26617e-05	down	UCSC_knowngene	7274	chr10:69989935-70027436+	exon sense-overlapping	ENSMUST00000181974	Ank3	chr10:69925954-70024643+
chr10	69990801	69991340	diffreps_peak_00012881	5.98311	539	uc007fnn.1	Ank3	-2.15806	1.03965e-06	3.26617e-05	down	UCSC_knowngene	7274	chr10:69989935-70027436+	exon sense-overlapping	ENSMUST00000183074	Ank3	chr10:69925773-70024882+
chr9	47799159	47799460	diffreps_peak_00147757	5.8985	301	NR_046048	Gm10677	-2.45324	1.26327e-06	3.81828e-05	down	RefSeq	2102	chr9:47799160-47818208-	natural antisense	ENSMUST00000152459	Cadm1	chr9:47530211-47850587+
chr3	63980841	63981200	diffreps_peak_00089187	5.389	359	ENSMUST00000163074	Gmps	-5.74503	4.08323e-06	9.81312e-05	down	Ensembl	3418	chr3:63976210-63983452+	exon sense-overlapping	ENSMUST00000029405	Gmps	chr3:63976106-64022579+
chr3	79648681	79649000	diffreps_peak_00089634	8.22894	319	ENSMUST00000182491	Rxfp1	-108.3	5.90288e-09	7.14938e-07	down	Ensembl	4983	chr3:79644112-79737880-	exon sense-overlapping	ENSMUST00000078527	Rxfp1	chr3:79641611-79737794-
chr13	83524855	83525360	diffreps_peak_00038758	7.22217	505	uc007rig.1	AK043267	-2.54222	5.99553e-08	3.57348e-06	down	UCSC_knowngene	2484	chr13:83524856-83527339+	intron sense-overlapping	NM_025282	Mef2c	chr13:83504034-83667079+
chr7	61535075	61535440	diffreps_peak_00129468	5.47672	365	NR_045727	B230209E15Rik	-2.11901	3.33639e-06	8.36145e-05	down	RefSeq	2058	chr7:61529410-61615327-	intergenic	NA	NA	NA
chr10	69990801	69991340	diffreps_peak_00012881	5.98311	539	uc007fnn.1	Ank3	-2.15806	1.03965e-06	3.26617e-05	down	UCSC_knowngene	7274	chr10:69989935-70027436+	exon sense-overlapping	ENSMUST00000092431	Ank3	chr10:69534222-70015633+
chr4	41773735	41774169	diffreps_peak_00095641	8.75051	434	ENSMUST00000130197	Ccl27a	-2.76575	1.77618e-09	3.17268e-07	down	Ensembl	657	chr4:41773188-41774169-	exon sense-overlapping	ENSMUST00000108036	Ccl27a	chr4:41769467-41774097-
chr10	69990801	69991340	diffreps_peak_00012881	5.98311	539	uc007fnn.1	Ank3	-2.15806	1.03965e-06	3.26617e-05	down	UCSC_knowngene	7274	chr10:69989935-70027436+	exon sense-overlapping	NM_170687	Ank3	chr10:69925532-70027436+
chr13	83524855	83525360	diffreps_peak_00038758	7.22217	505	uc007rig.1	AK043267	-2.54222	5.99553e-08	3.57348e-06	down	UCSC_knowngene	2484	chr13:83524856-83527339+	intron sense-overlapping	NM_001170537	Mef2c	chr13:83504034-83667079+
chr12	109563281	109564240	diffreps_peak_00034329	5.30204	959	NR_003633	Meg3	-2.44738	4.98834e-06	0.000114505	down	RefSeq	11488	chr12:109545398-109568650+	intergenic	NA	NA	NA
chr4	42026261	42026580	diffreps_peak_00095678	10.9396	319	ENSMUST00000117125	Gm13303	-2.62958	1.1493e-11	1.04065e-08	down	Ensembl	1284	chr4:42025429-42026712-	intergenic	NA	NA	NA
chr1	21960561	21961000	diffreps_peak_00000698	6.41277	439	ENSMUST00000181002	Gm26580	-3.73741	3.86574e-07	1.50539e-05	down	Ensembl	2095	chr1:21959842-21962530+	natural antisense	ENSMUST00000173404	Kcnq5	chr1:21402163-21961581-
chr19	57323601	57324062	diffreps_peak_00074631	7.0516	461	NR_040316	B230217O12Rik	-4.77866	8.8798e-08	4.78698e-06	down	RefSeq	1954	chr19:57323197-57360899-	bidirectional	NM_145505	Fam160b1	chr19:57361009-57389594+
chr9	47799159	47799460	diffreps_peak_00147757	5.8985	301	NR_046048	Gm10677	-2.45324	1.26327e-06	3.81828e-05	down	RefSeq	2102	chr9:47799160-47818208-	natural antisense	ENSMUST00000143026	Cadm1	chr9:47530244-47857637+
chr2	30955461	30955860	diffreps_peak_00077084	6.19109	399	ENSMUST00000133544	Tor1b	-4.37178	6.44033e-07	2.24471e-05	down	Ensembl	4775	chr2:30952979-30959011+	exon sense-overlapping	NM_133673	Tor1b	chr2:30953001-30959015+
chr12	61523149	61523760	diffreps_peak_00031176	5.8118	611	ENSMUST00000130887	Lrfn5	-2.58727	1.54241e-06	4.46884e-05	down	Ensembl	1724	chr12:61523150-61605008+	exon sense-overlapping	ENSMUST00000119481	Lrfn5	chr12:61523948-61857928+
chr13	54765241	54765692	diffreps_peak_00037589	7.37437	451	ENSMUST00000138067	Sncb	-2.30886	4.22308e-08	2.80163e-06	down	Ensembl	822	chr13:54765059-54766492-	exon sense-overlapping	ENSMUST00000134110	Sncb	chr13:54759381-54766097-
chr12	105382121	105382500	diffreps_peak_00033987	9.15014	379	NR_045047	Tunar	-10.6561	7.07713e-10	1.65158e-07	down	RefSeq	3302	chr12:105336594-105383932+	intergenic	NA	NA	NA
chr1	21960561	21961000	diffreps_peak_00000698	6.41277	439	ENSMUST00000181002	Gm26580	-3.73741	3.86574e-07	1.50539e-05	down	Ensembl	2095	chr1:21959842-21962530+	natural antisense	NM_001160139	Kcnq5	chr1:21398403-21961942-
chr10	69990801	69991340	diffreps_peak_00012881	5.98311	539	uc007fnn.1	Ank3	-2.15806	1.03965e-06	3.26617e-05	down	UCSC_knowngene	7274	chr10:69989935-70027436+	exon sense-overlapping	NM_146005	Ank3	chr10:69533708-70027436+
chr6	124739761	124740240	diffreps_peak_00122968	6.22849	479	ENSMUST00000140423	Grcc10	-6.35258	5.90899e-07	2.09864e-05	down	Ensembl	1656	chr6:124739186-124741065-	exon sense-overlapping	NM_013535	Grcc10	chr6:124739184-124741079-
chr10	69990801	69991340	diffreps_peak_00012881	5.98311	539	uc007fnn.1	Ank3	-2.15806	1.03965e-06	3.26617e-05	down	UCSC_knowngene	7274	chr10:69989935-70027436+	exon sense-overlapping	ENSMUST00000092433	Ank3	chr10:69925532-70024954+
chr19	6408301	6408640	diffreps_peak_00071296	6.76534	339	ENSMUST00000152022	Rasgrp2	-3.56943	1.71655e-07	7.96215e-06	down	Ensembl	8815	chr19:6404827-6414041+	exon sense-overlapping	ENSMUST00000113476	Rasgrp2	chr19:6399340-6415210+
chr10	69990801	69991340	diffreps_peak_00012881	5.98311	539	uc007fnn.1	Ank3	-2.15806	1.03965e-06	3.26617e-05	down	UCSC_knowngene	7274	chr10:69989935-70027436+	exon sense-overlapping	ENSMUST00000183261	Ank3	chr10:69925773-70024882+
chr19	8845781	8846100	diffreps_peak_00071728	5.62929	319	ENSMUST00000159571	Bscl2	-4.25953	2.34805e-06	6.26452e-05	down	Ensembl	2806	chr19:8839373-8848667+	exon sense-overlapping	ENSMUST00000159634	Bscl2	chr19:8837729-8848667+
chr5	29752396	29752738	diffreps_peak_00106458	6.29093	342	ENSMUST00000151976	Dnajb6	-2.87072	5.1176e-07	1.87174e-05	down	Ensembl	668	chr5:29750722-29752738+	exon sense-overlapping	NM_011847	Dnajb6	chr5:29735898-29767101+
chr5	29752396	29752738	diffreps_peak_00106458	6.29093	342	ENSMUST00000151976	Dnajb6	-2.87072	5.1176e-07	1.87174e-05	down	Ensembl	668	chr5:29750722-29752738+	exon sense-overlapping	ENSMUST00000008733	Dnajb6	chr5:29735688-29786478+
chr10	69990801	69991340	diffreps_peak_00012881	5.98311	539	uc007fnn.1	Ank3	-2.15806	1.03965e-06	3.26617e-05	down	UCSC_knowngene	7274	chr10:69989935-70027436+	exon sense-overlapping	NM_170729	Ank3	chr10:69533708-70027436+
chr4	41773735	41774169	diffreps_peak_00095641	8.75051	434	ENSMUST00000130197	Ccl27a	-2.76575	1.77618e-09	3.17268e-07	down	Ensembl	657	chr4:41773188-41774169-	exon sense-overlapping	ENSMUST00000108032	Ccl27a	chr4:41773188-41774158-
chr12	61523149	61523760	diffreps_peak_00031176	5.8118	611	ENSMUST00000130887	Lrfn5	-2.58727	1.54241e-06	4.46884e-05	down	Ensembl	1724	chr12:61523150-61605008+	exon sense-overlapping	ENSMUST00000055815	Lrfn5	chr12:61523948-61845258+
chr10	69990801	69991340	diffreps_peak_00012881	5.98311	539	uc007fnn.1	Ank3	-2.15806	1.03965e-06	3.26617e-05	down	UCSC_knowngene	7274	chr10:69989935-70027436+	exon sense-overlapping	ENSMUST00000182795	Ank3	chr10:69926080-70024626+
chr10	108636550	108636920	diffreps_peak_00016016	6.1846	370	ENSMUST00000147593	Syt1	-3.05825	6.53736e-07	2.27026e-05	down	Ensembl	717	chr10:108627286-108636964-	exon sense-overlapping	ENSMUST00000105276	Syt1	chr10:108497650-109010975-
chr6	124739761	124740240	diffreps_peak_00122968	6.22849	479	ENSMUST00000140423	Grcc10	-6.35258	5.90899e-07	2.09864e-05	down	Ensembl	1656	chr6:124739186-124741065-	exon sense-overlapping	ENSMUST00000004389	Grcc10	chr6:124739183-124741374-
chr10	69990801	69991340	diffreps_peak_00012881	5.98311	539	uc007fnn.1	Ank3	-2.15806	1.03965e-06	3.26617e-05	down	UCSC_knowngene	7274	chr10:69989935-70027436+	exon sense-overlapping	ENSMUST00000054167	Ank3	chr10:69534222-70015633+
chr4	142143293	142143620	diffreps_peak_00103298	7.31795	327	ENSMUST00000148812	Kazn	-3.07066	4.80891e-08	3.05858e-06	down	Ensembl	5725	chr4:142139244-142146465-	exon sense-overlapping	ENSMUST00000174432	Kazn	chr4:142141541-142210206-

## Sheet: Down-OGDR3h_vs_control
Chromosome	Transcript start	Transcript end	Peak ID	Score	Peak length	Transcript ID	Gene mame	Fold change	P value	FDR	Regulation	Source	RNA length	Coordinates	Relationship	Associated gene ID	Associated gene name	Associated gene coordinates
chr8	71660340	71660649	diffreps_peak_00132767	7.07678	309	ENSMUST00000176777	Unc13a	-2.5558	8.37953e-08	3.04586e-06	down	Ensembl	944	chr8:71660341-71671741-	exon sense-overlapping	ENSMUST00000030170	Unc13a	chr8:71624417-71671757-
chr10	69990561	69991120	diffreps_peak_00012267	5.76843	559	uc007fnn.1	Ank3	-2.74378	1.70439e-06	3.40775e-05	down	UCSC_knowngene	7274	chr10:69989935-70027436+	exon sense-overlapping	ENSMUST00000182155	Ank3	chr10:69533843-70024626+
chr10	108636550	108636920	diffreps_peak_00015089	6.17715	370	ENSMUST00000147593	Syt1	-3.0269	6.65042e-07	1.55369e-05	down	Ensembl	717	chr10:108627286-108636964-	exon sense-overlapping	NM_001252342	Syt1	chr10:108497650-109010975-
chr12	109560761	109562540	diffreps_peak_00032481	7.58513	1779	NR_003633	Meg3	-2.43146	2.5994e-08	1.29538e-06	down	RefSeq	11488	chr12:109545398-109568650+	intergenic	NA	NA	NA
chrX	48207961	48208360	diffreps_peak_00146305	8.33407	399	ENSMUST00000127440	Zdhhc9	-11.2686	4.6337e-09	4.04506e-07	down	Ensembl	3432	chrX:48190044-48208602-	exon sense-overlapping	NM_172465	Zdhhc9	chrX:48171971-48208702-
chrX	48207961	48208360	diffreps_peak_00146305	8.33407	399	ENSMUST00000127440	Zdhhc9	-11.2686	4.6337e-09	4.04506e-07	down	Ensembl	3432	chrX:48190044-48208602-	exon sense-overlapping	ENSMUST00000088935	Zdhhc9	chrX:48171969-48208878-
chrX	71440281	71440611	diffreps_peak_00146774	7.45701	330	ENSMUST00000128515	Cd99l2	-7.90816	3.49132e-08	1.60708e-06	down	Ensembl	1609	chrX:71439335-71492649-	exon sense-overlapping	ENSMUST00000114586	Cd99l2	chrX:71420060-71492849-
chr10	69990561	69991120	diffreps_peak_00012267	5.76843	559	uc007fnn.1	Ank3	-2.74378	1.70439e-06	3.40775e-05	down	UCSC_knowngene	7274	chr10:69989935-70027436+	exon sense-overlapping	ENSMUST00000183023	Ank3	chr10:69987849-70024628+
chr12	109559481	109560260	diffreps_peak_00032479	5.688	779	NR_003633	Meg3	-2.58436	2.05116e-06	3.97496e-05	down	RefSeq	11488	chr12:109545398-109568650+	intergenic	NA	NA	NA
chr10	69990561	69991120	diffreps_peak_00012267	5.76843	559	uc007fnn.1	Ank3	-2.74378	1.70439e-06	3.40775e-05	down	UCSC_knowngene	7274	chr10:69989935-70027436+	exon sense-overlapping	NM_170729	Ank3	chr10:69533708-70027436+
chr4	41773735	41774169	diffreps_peak_00090761	6.25334	434	ENSMUST00000130197	Ccl27a	-2.19098	5.5803e-07	1.34846e-05	down	Ensembl	657	chr4:41773188-41774169-	exon sense-overlapping	ENSMUST00000108037	Ccl27a	chr4:41769467-41774142-
chr10	69990561	69991120	diffreps_peak_00012267	5.76843	559	uc007fnn.1	Ank3	-2.74378	1.70439e-06	3.40775e-05	down	UCSC_knowngene	7274	chr10:69989935-70027436+	exon sense-overlapping	NM_146005	Ank3	chr10:69533708-70027436+
chr10	108636550	108636920	diffreps_peak_00015089	6.17715	370	ENSMUST00000147593	Syt1	-3.0269	6.65042e-07	1.55369e-05	down	Ensembl	717	chr10:108627286-108636964-	exon sense-overlapping	ENSMUST00000105276	Syt1	chr10:108497650-109010975-
chr7	4710421	4710740	diffreps_peak_00118371	8.99182	319	ENSMUST00000123637	Brsk1	-2.58086	1.01901e-09	1.4167e-07	down	Ensembl	610	chr7:4708978-4710992+	exon sense-overlapping	ENSMUST00000048248	Brsk1	chr7:4690928-4715997+
chr14	55560401	55560860	diffreps_peak_00041051	6.83057	459	ENSMUST00000129310	Dcaf11	-4.15272	1.47716e-07	4.67917e-06	down	Ensembl	7271	chr14:55560121-55569535+	exon sense-overlapping	NM_133734	Dcaf11	chr14:55560029-55570065+
chr11	84906081	84906440	diffreps_peak_00022660	6.76131	359	ENSMUST00000141705	Myo19	-8.82787	1.73258e-07	5.31462e-06	down	Ensembl	5360	chr11:84880220-84911122+	exon sense-overlapping	ENSMUST00000093969	Myo19	chr11:84880148-84911226+
chr9	47799159	47799500	diffreps_peak_00140276	5.92075	341	NR_046048	Gm10677	-2.49704	1.20019e-06	2.53225e-05	down	RefSeq	2102	chr9:47799160-47818208-	natural antisense	NM_207675	Cadm1	chr9:47530352-47853385+
chr16	31428581	31429100	diffreps_peak_00052268	6.02345	519	ENSMUST00000182690	Gm15743	-2.50314	9.47433e-07	2.07809e-05	down	Ensembl	1901	chr16:31427876-31429776-	natural antisense	ENSMUST00000115227	Bdh1	chr16:31428748-31458901+
chr2	181680309	181680620	diffreps_peak_00082430	6.22615	311	ENSMUST00000129686	Tcea2	-2.48617	5.94084e-07	1.41488e-05	down	Ensembl	2167	chr2:181680310-181687347+	exon sense-overlapping	ENSMUST00000129006	Tcea2	chr2:181682885-181688045+
chr14	55560401	55560860	diffreps_peak_00041051	6.83057	459	ENSMUST00000129310	Dcaf11	-4.15272	1.47716e-07	4.67917e-06	down	Ensembl	7271	chr14:55560121-55569535+	exon sense-overlapping	ENSMUST00000117236	Dcaf11	chr14:55560006-55570065+
chr9	47799159	47799500	diffreps_peak_00140276	5.92075	341	NR_046048	Gm10677	-2.49704	1.20019e-06	2.53225e-05	down	RefSeq	2102	chr9:47799160-47818208-	natural antisense	NM_207676	Cadm1	chr9:47530352-47853385+
chr15	89531061	89531418	diffreps_peak_00048668	8.5758	357	ENSMUST00000123799	Shank3	-4.8257	2.65584e-09	2.85057e-07	down	Ensembl	911	chr15:89530796-89532408+	exon sense-overlapping	ENSMUST00000066545	Shank3	chr15:89501283-89560259+
chr13	83524855	83525360	diffreps_peak_00036759	7.89147	505	uc007rig.1	AK043267	-2.98755	1.2839e-08	8.05549e-07	down	UCSC_knowngene	2484	chr13:83524856-83527339+	intron sense-overlapping	ENSMUST00000005722	Mef2c	chr13:83504034-83667079+
chr10	69990561	69991120	diffreps_peak_00012267	5.76843	559	uc007fnn.1	Ank3	-2.74378	1.70439e-06	3.40775e-05	down	UCSC_knowngene	7274	chr10:69989935-70027436+	exon sense-overlapping	ENSMUST00000182437	Ank3	chr10:69926133-70023995+
chr10	69990561	69991120	diffreps_peak_00012267	5.76843	559	uc007fnn.1	Ank3	-2.74378	1.70439e-06	3.40775e-05	down	UCSC_knowngene	7274	chr10:69989935-70027436+	exon sense-overlapping	ENSMUST00000182439	Ank3	chr10:69534208-70023866+
chr10	45485461	45485777	diffreps_peak_00011234	5.00879	316	uc007fac.2	Lin28b	-2.72896	9.79969e-06	0.000149495	down	UCSC_knowngene	2902	chr10:45456583-45485777-	exon sense-overlapping	NM_001031772	Lin28b	chr10:45376619-45470201-
chr11	84906081	84906440	diffreps_peak_00022660	6.76131	359	ENSMUST00000141705	Myo19	-8.82787	1.73258e-07	5.31462e-06	down	Ensembl	5360	chr11:84880220-84911122+	exon sense-overlapping	ENSMUST00000020837	Myo19	chr11:84880367-84893055+
chr10	69990561	69991120	diffreps_peak_00012267	5.76843	559	uc007fnn.1	Ank3	-2.74378	1.70439e-06	3.40775e-05	down	UCSC_knowngene	7274	chr10:69989935-70027436+	exon sense-overlapping	NM_170687	Ank3	chr10:69925532-70027436+
chr4	141006301	141006740	diffreps_peak_00097776	6.38276	439	ENSMUST00000151517	Atp13a2	-2.12718	4.14229e-07	1.05888e-05	down	Ensembl	4266	chr4:140986900-141007330+	exon sense-overlapping	ENSMUST00000037055	Atp13a2	chr4:140986873-141007330+
chr10	88381701	88382180	diffreps_peak_00014300	5.02421	479	ENSMUST00000181000	Gm26546	-10.2651	9.45778e-06	0.000145318	down	Ensembl	4276	chr10:88379244-88383711-	natural antisense	ENSMUST00000127615	Gnptab	chr10:88379132-88414598+
chr10	69990561	69991120	diffreps_peak_00012267	5.76843	559	uc007fnn.1	Ank3	-2.74378	1.70439e-06	3.40775e-05	down	UCSC_knowngene	7274	chr10:69989935-70027436+	exon sense-overlapping	ENSMUST00000092434	Ank3	chr10:69534222-70015633+
chr10	69990561	69991120	diffreps_peak_00012267	5.76843	559	uc007fnn.1	Ank3	-2.74378	1.70439e-06	3.40775e-05	down	UCSC_knowngene	7274	chr10:69989935-70027436+	exon sense-overlapping	ENSMUST00000047061	Ank3	chr10:69534222-70015633+
chr2	181680309	181680620	diffreps_peak_00082430	6.22615	311	ENSMUST00000129686	Tcea2	-2.48617	5.94084e-07	1.41488e-05	down	Ensembl	2167	chr2:181680310-181687347+	exon sense-overlapping	ENSMUST00000129745	Tcea2	chr2:181681190-181688051+
chr10	69990561	69991120	diffreps_peak_00012267	5.76843	559	uc007fnn.1	Ank3	-2.74378	1.70439e-06	3.40775e-05	down	UCSC_knowngene	7274	chr10:69989935-70027436+	exon sense-overlapping	ENSMUST00000182269	Ank3	chr10:69925773-70024882+
chr19	6408301	6408660	diffreps_peak_00067614	5.1836	359	ENSMUST00000152022	Rasgrp2	-3.39902	6.55244e-06	0.00010555	down	Ensembl	8815	chr19:6404827-6414041+	exon sense-overlapping	ENSMUST00000113476	Rasgrp2	chr19:6399340-6415210+
chr10	69990561	69991120	diffreps_peak_00012267	5.76843	559	uc007fnn.1	Ank3	-2.74378	1.70439e-06	3.40775e-05	down	UCSC_knowngene	7274	chr10:69989935-70027436+	exon sense-overlapping	NM_170730	Ank3	chr10:69533708-70027436+
chrX	48207961	48208360	diffreps_peak_00146305	8.33407	399	ENSMUST00000127440	Zdhhc9	-11.2686	4.6337e-09	4.04506e-07	down	Ensembl	3432	chrX:48190044-48208602-	exon sense-overlapping	ENSMUST00000037960	Zdhhc9	chrX:48171969-48208687-
chr19	6408301	6408660	diffreps_peak_00067614	5.1836	359	ENSMUST00000152022	Rasgrp2	-3.39902	6.55244e-06	0.00010555	down	Ensembl	8815	chr19:6404827-6414041+	exon sense-overlapping	ENSMUST00000035716	Rasgrp2	chr19:6400562-6415216+
chr4	141006301	141006740	diffreps_peak_00097776	6.38276	439	ENSMUST00000151517	Atp13a2	-2.12718	4.14229e-07	1.05888e-05	down	Ensembl	4266	chr4:140986900-141007330+	exon sense-overlapping	NM_029097	Atp13a2	chr4:140986873-141007701+
chr4	141006301	141006740	diffreps_peak_00097776	6.38276	439	ENSMUST00000151517	Atp13a2	-2.12718	4.14229e-07	1.05888e-05	down	Ensembl	4266	chr4:140986900-141007330+	exon sense-overlapping	ENSMUST00000168047	Atp13a2	chr4:140986873-141005087+
chr2	37672521	37672880	diffreps_peak_00073928	10.1769	359	ENSMUST00000121230	Gm13543	-7.827	6.6546e-11	1.81716e-08	down	Ensembl	796	chr2:37672208-37673003+	intronic antisense	ENSMUST00000155237	Strbp	chr2:37640855-37703859-
chr10	69990561	69991120	diffreps_peak_00012267	5.76843	559	uc007fnn.1	Ank3	-2.74378	1.70439e-06	3.40775e-05	down	UCSC_knowngene	7274	chr10:69989935-70027436+	exon sense-overlapping	ENSMUST00000183261	Ank3	chr10:69925773-70024882+
chr10	69990561	69991120	diffreps_peak_00012267	5.76843	559	uc007fnn.1	Ank3	-2.74378	1.70439e-06	3.40775e-05	down	UCSC_knowngene	7274	chr10:69989935-70027436+	exon sense-overlapping	NM_170688	Ank3	chr10:69533708-70027436+
chr9	47799159	47799500	diffreps_peak_00140276	5.92075	341	NR_046048	Gm10677	-2.49704	1.20019e-06	2.53225e-05	down	RefSeq	2102	chr9:47799160-47818208-	natural antisense	ENSMUST00000085909	Cadm1	chr9:47530257-47851029+
chr4	41773735	41774169	diffreps_peak_00090761	6.25334	434	ENSMUST00000130197	Ccl27a	-2.19098	5.5803e-07	1.34846e-05	down	Ensembl	657	chr4:41773188-41774169-	exon sense-overlapping	NM_001048179	Ccl27a	chr4:41769470-41774134-
chr4	141006301	141006740	diffreps_peak_00097776	6.38276	439	ENSMUST00000151517	Atp13a2	-2.12718	4.14229e-07	1.05888e-05	down	Ensembl	4266	chr4:140986900-141007330+	exon sense-overlapping	NM_001164366	Atp13a2	chr4:140986873-141007701+
chr2	148706681	148707023	diffreps_peak_00079189	6.74946	342	ENSMUST00000140647	Napb	-2.51963	1.78048e-07	5.43111e-06	down	Ensembl	3087	chr2:148706418-148732391-	exon sense-overlapping	ENSMUST00000028926	Napb	chr2:148693985-148732467-
chr10	69990561	69991120	diffreps_peak_00012267	5.76843	559	uc007fnn.1	Ank3	-2.74378	1.70439e-06	3.40775e-05	down	UCSC_knowngene	7274	chr10:69989935-70027436+	exon sense-overlapping	ENSMUST00000182795	Ank3	chr10:69926080-70024626+
chr10	69990561	69991120	diffreps_peak_00012267	5.76843	559	uc007fnn.1	Ank3	-2.74378	1.70439e-06	3.40775e-05	down	UCSC_knowngene	7274	chr10:69989935-70027436+	exon sense-overlapping	ENSMUST00000182972	Ank3	chr10:69898131-70023921+
chr4	95967161	95967540	diffreps_peak_00093101	6.44273	379	NR_045776	9530080O11Rik	-2.56843	3.60799e-07	9.52006e-06	down	RefSeq	1479	chr4:95959711-95967655-	natural antisense	NM_030014	Hook1	chr4:95967379-96024274+
chr10	45485461	45485777	diffreps_peak_00011234	5.00879	316	uc007fac.2	Lin28b	-2.72896	9.79969e-06	0.000149495	down	UCSC_knowngene	2902	chr10:45456583-45485777-	exon sense-overlapping	ENSMUST00000079390	Lin28b	chr10:45376620-45470201-
chr4	41773735	41774169	diffreps_peak_00090761	6.25334	434	ENSMUST00000130197	Ccl27a	-2.19098	5.5803e-07	1.34846e-05	down	Ensembl	657	chr4:41773188-41774169-	exon sense-overlapping	ENSMUST00000108036	Ccl27a	chr4:41769467-41774097-
chr16	31428581	31429100	diffreps_peak_00052268	6.02345	519	ENSMUST00000182690	Gm15743	-2.50314	9.47433e-07	2.07809e-05	down	Ensembl	1901	chr16:31427876-31429776-	natural antisense	NM_001122683	Bdh1	chr16:31428753-31458901+
chr10	88381701	88382180	diffreps_peak_00014300	5.02421	479	ENSMUST00000181000	Gm26546	-10.2651	9.45778e-06	0.000145318	down	Ensembl	4276	chr10:88379244-88383711-	natural antisense	ENSMUST00000130301	Gnptab	chr10:88379224-88414555+
chr11	84906081	84906440	diffreps_peak_00022660	6.76131	359	ENSMUST00000141705	Myo19	-8.82787	1.73258e-07	5.31462e-06	down	Ensembl	5360	chr11:84880220-84911122+	natural antisense	ENSMUST00000103195	Znhit3	chr11:84910950-84916366-
chr2	181680309	181680620	diffreps_peak_00082430	6.22615	311	ENSMUST00000129686	Tcea2	-2.48617	5.94084e-07	1.41488e-05	down	Ensembl	2167	chr2:181680310-181687347+	exon sense-overlapping	NM_009326	Tcea2	chr2:181680310-181688051+
chr10	69990561	69991120	diffreps_peak_00012267	5.76843	559	uc007fnn.1	Ank3	-2.74378	1.70439e-06	3.40775e-05	down	UCSC_knowngene	7274	chr10:69989935-70027436+	exon sense-overlapping	ENSMUST00000092433	Ank3	chr10:69925532-70024954+
chr15	89531061	89531418	diffreps_peak_00048668	8.5758	357	ENSMUST00000123799	Shank3	-4.8257	2.65584e-09	2.85057e-07	down	Ensembl	911	chr15:89530796-89532408+	exon sense-overlapping	ENSMUST00000039074	Shank3	chr15:89499857-89560261+
chr4	95967161	95967540	diffreps_peak_00093101	6.44273	379	NR_045776	9530080O11Rik	-2.56843	3.60799e-07	9.52006e-06	down	RefSeq	1479	chr4:95959711-95967655-	natural antisense	ENSMUST00000030306	Hook1	chr4:95967240-96025413+
chr14	55560401	55560860	diffreps_peak_00041051	6.83057	459	ENSMUST00000129310	Dcaf11	-4.15272	1.47716e-07	4.67917e-06	down	Ensembl	7271	chr14:55560121-55569535+	exon sense-overlapping	NM_001199009	Dcaf11	chr14:55560923-55570065+
chr9	47799159	47799500	diffreps_peak_00140276	5.92075	341	NR_046048	Gm10677	-2.49704	1.20019e-06	2.53225e-05	down	RefSeq	2102	chr9:47799160-47818208-	natural antisense	ENSMUST00000114548	Cadm1	chr9:47530173-47853385+
chr14	55560401	55560860	diffreps_peak_00041051	6.83057	459	ENSMUST00000129310	Dcaf11	-4.15272	1.47716e-07	4.67917e-06	down	Ensembl	7271	chr14:55560121-55569535+	exon sense-overlapping	ENSMUST00000147981	Dcaf11	chr14:55560018-55561441+
chr9	47799159	47799500	diffreps_peak_00140276	5.92075	341	NR_046048	Gm10677	-2.49704	1.20019e-06	2.53225e-05	down	RefSeq	2102	chr9:47799160-47818208-	natural antisense	ENSMUST00000034581	Cadm1	chr9:47530373-47850390+
chrX	71440281	71440611	diffreps_peak_00146774	7.45701	330	ENSMUST00000128515	Cd99l2	-7.90816	3.49132e-08	1.60708e-06	down	Ensembl	1609	chrX:71439335-71492649-	exon sense-overlapping	ENSMUST00000080035	Cd99l2	chrX:71420060-71492645-
chr2	65853261	65853720	diffreps_peak_00075007	6.36213	459	ENSMUST00000155722	Gm13619	-2.96125	4.34384e-07	1.10146e-05	down	Ensembl	2138	chr2:65852408-65860619-	natural antisense	ENSMUST00000122912	Csrnp3	chr2:65845767-66031546+
chr10	69990561	69991120	diffreps_peak_00012267	5.76843	559	uc007fnn.1	Ank3	-2.74378	1.70439e-06	3.40775e-05	down	UCSC_knowngene	7274	chr10:69989935-70027436+	exon sense-overlapping	NM_009670	Ank3	chr10:69925532-70027436+
chr14	55560401	55560860	diffreps_peak_00041051	6.83057	459	ENSMUST00000129310	Dcaf11	-4.15272	1.47716e-07	4.67917e-06	down	Ensembl	7271	chr14:55560121-55569535+	natural antisense	ENSMUST00000066106	A730061H03Rik	chr14:55559942-55560406-
chr7	4710421	4710740	diffreps_peak_00118371	8.99182	319	ENSMUST00000123637	Brsk1	-2.58086	1.01901e-09	1.4167e-07	down	Ensembl	610	chr7:4708978-4710992+	natural antisense	ENSMUST00000086364	Tmem150b	chr7:4706832-4725249-
chr10	116473821	116474387	diffreps_peak_00015394	7.39761	566	NR_130644	Kcnmb4os2	-2.22347	4.00302e-08	1.77032e-06	down	RefSeq	1615	chr10:116473163-116474986+	natural antisense	ENSMUST00000164271	Kcnmb4	chr10:116436193-116473435-
chr10	69990561	69991120	diffreps_peak_00012267	5.76843	559	uc007fnn.1	Ank3	-2.74378	1.70439e-06	3.40775e-05	down	UCSC_knowngene	7274	chr10:69989935-70027436+	exon sense-overlapping	ENSMUST00000181974	Ank3	chr10:69925954-70024643+
chr10	69990561	69991120	diffreps_peak_00012267	5.76843	559	uc007fnn.1	Ank3	-2.74378	1.70439e-06	3.40775e-05	down	UCSC_knowngene	7274	chr10:69989935-70027436+	exon sense-overlapping	ENSMUST00000092431	Ank3	chr10:69534222-70015633+
chr11	84906081	84906440	diffreps_peak_00022660	6.76131	359	ENSMUST00000141705	Myo19	-8.82787	1.73258e-07	5.31462e-06	down	Ensembl	5360	chr11:84880220-84911122+	exon sense-overlapping	NM_025414	Myo19	chr11:84880220-84911131+
chr10	69990561	69991120	diffreps_peak_00012267	5.76843	559	uc007fnn.1	Ank3	-2.74378	1.70439e-06	3.40775e-05	down	UCSC_knowngene	7274	chr10:69989935-70027436+	exon sense-overlapping	ENSMUST00000182992	Ank3	chr10:69706370-70015631+
chr4	41773735	41774169	diffreps_peak_00090761	6.25334	434	ENSMUST00000130197	Ccl27a	-2.19098	5.5803e-07	1.34846e-05	down	Ensembl	657	chr4:41773188-41774169-	exon sense-overlapping	ENSMUST00000173865	Ccl27a	chr4:41772895-41774101-
chr10	69990561	69991120	diffreps_peak_00012267	5.76843	559	uc007fnn.1	Ank3	-2.74378	1.70439e-06	3.40775e-05	down	UCSC_knowngene	7274	chr10:69989935-70027436+	exon sense-overlapping	NM_170728	Ank3	chr10:69533708-70027436+
chr2	28933474	28933820	diffreps_peak_00072728	6.05428	346	ENSMUST00000163460	Gm13394	-4.85283	8.82512e-07	1.96282e-05	down	Ensembl	1178	chr2:28933475-28934652-	intergenic	NA	NA	NA
chr14	55560401	55560860	diffreps_peak_00041051	6.83057	459	ENSMUST00000129310	Dcaf11	-4.15272	1.47716e-07	4.67917e-06	down	Ensembl	7271	chr14:55560121-55569535+	exon sense-overlapping	ENSMUST00000121622	Dcaf11	chr14:55560512-55569931+
chr10	108636550	108636920	diffreps_peak_00015089	6.17715	370	ENSMUST00000147593	Syt1	-3.0269	6.65042e-07	1.55369e-05	down	Ensembl	717	chr10:108627286-108636964-	exon sense-overlapping	ENSMUST00000064054	Syt1	chr10:108497652-109010982-
chr6	126740561	126740960	diffreps_peak_00117027	6.18739	399	ENSMUST00000181126	Gm26673	-3.59769	6.49549e-07	1.52233e-05	down	Ensembl	3377	chr6:126718684-126741601+	natural antisense	ENSMUST00000112242	Kcna6	chr6:126736688-126740151-
chr10	108636550	108636920	diffreps_peak_00015089	6.17715	370	ENSMUST00000147593	Syt1	-3.0269	6.65042e-07	1.55369e-05	down	Ensembl	717	chr10:108627286-108636964-	exon sense-overlapping	ENSMUST00000156979	Syt1	chr10:108627342-109009111-
chr14	55560401	55560860	diffreps_peak_00041051	6.83057	459	ENSMUST00000129310	Dcaf11	-4.15272	1.47716e-07	4.67917e-06	down	Ensembl	7271	chr14:55560121-55569535+	exon sense-overlapping	ENSMUST00000117701	Dcaf11	chr14:55561067-55569931+
chr10	34297342	34297760	diffreps_peak_00010706	6.06173	418	ENSMUST00000181185	Gm26564	-2.02498	8.67509e-07	1.93465e-05	down	Ensembl	2777	chr10:34295912-34298907-	natural antisense	NM_030203	Tspyl4	chr10:34297421-34301320+
chr18	31447321	31447700	diffreps_peak_00063353	8.11401	379	ENSMUST00000181067	Gm26658	-3.82975	7.69108e-09	5.78631e-07	down	Ensembl	2500	chr18:31440318-31449099+	natural antisense	ENSMUST00000025110	Syt4	chr18:31437808-31447415-
chr12	109560341	109560700	diffreps_peak_00032480	7.62862	359	NR_003633	Meg3	-2.35862	2.35168e-08	1.20971e-06	down	RefSeq	11488	chr12:109545398-109568650+	intergenic	NA	NA	NA
chrX	71440281	71440611	diffreps_peak_00146774	7.45701	330	ENSMUST00000128515	Cd99l2	-7.90816	3.49132e-08	1.60708e-06	down	Ensembl	1609	chrX:71439335-71492649-	exon sense-overlapping	ENSMUST00000114587	Cd99l2	chrX:71422624-71492849-
chr2	65853261	65853720	diffreps_peak_00075007	6.36213	459	ENSMUST00000155722	Gm13619	-2.96125	4.34384e-07	1.10146e-05	down	Ensembl	2138	chr2:65852408-65860619-	natural antisense	NM_153409	Csrnp3	chr2:65845767-66031546+
chr10	69990561	69991120	diffreps_peak_00012267	5.76843	559	uc007fnn.1	Ank3	-2.74378	1.70439e-06	3.40775e-05	down	UCSC_knowngene	7274	chr10:69989935-70027436+	exon sense-overlapping	NM_170690	Ank3	chr10:69533708-70027436+
chrX	71440281	71440611	diffreps_peak_00146774	7.45701	330	ENSMUST00000128515	Cd99l2	-7.90816	3.49132e-08	1.60708e-06	down	Ensembl	1609	chrX:71439335-71492649-	exon sense-overlapping	NM_138309	Cd99l2	chrX:71420060-71492849-
chr10	69990561	69991120	diffreps_peak_00012267	5.76843	559	uc007fnn.1	Ank3	-2.74378	1.70439e-06	3.40775e-05	down	UCSC_knowngene	7274	chr10:69989935-70027436+	exon sense-overlapping	ENSMUST00000182884	Ank3	chr10:69533772-70027438+
chr4	41773735	41774169	diffreps_peak_00090761	6.25334	434	ENSMUST00000130197	Ccl27a	-2.19098	5.5803e-07	1.34846e-05	down	Ensembl	657	chr4:41773188-41774169-	exon sense-overlapping	NM_001164045	Ccl27a	chr4:41772895-41774101-
chrX	71440281	71440611	diffreps_peak_00146774	7.45701	330	ENSMUST00000128515	Cd99l2	-7.90816	3.49132e-08	1.60708e-06	down	Ensembl	1609	chrX:71439335-71492649-	exon sense-overlapping	ENSMUST00000037391	Cd99l2	chrX:71420060-71492849-
chr10	108636550	108636920	diffreps_peak_00015089	6.17715	370	ENSMUST00000147593	Syt1	-3.0269	6.65042e-07	1.55369e-05	down	Ensembl	717	chr10:108627286-108636964-	exon sense-overlapping	NM_009306	Syt1	chr10:108497650-109010975-
chr11	84906081	84906440	diffreps_peak_00022660	6.76131	359	ENSMUST00000141705	Myo19	-8.82787	1.73258e-07	5.31462e-06	down	Ensembl	5360	chr11:84880220-84911122+	natural antisense	ENSMUST00000108080	Pigw	chr11:84876843-84880285-
chr11	84906081	84906440	diffreps_peak_00022660	6.76131	359	ENSMUST00000141705	Myo19	-8.82787	1.73258e-07	5.31462e-06	down	Ensembl	5360	chr11:84880220-84911122+	natural antisense	NM_001005223	Znhit3	chr11:84910955-84916356-
chr18	82338773	82339130	diffreps_peak_00066715	8.03672	357	ENSMUST00000078739	Gm17383	-4.22905	9.18932e-09	6.51335e-07	down	Ensembl	1041	chr18:82338774-82339816+	intergenic	NA	NA	NA
chr9	47799159	47799500	diffreps_peak_00140276	5.92075	341	NR_046048	Gm10677	-2.49704	1.20019e-06	2.53225e-05	down	RefSeq	2102	chr9:47799160-47818208-	natural antisense	NM_018770	Cadm1	chr9:47530352-47853385+
chr10	69990561	69991120	diffreps_peak_00012267	5.76843	559	uc007fnn.1	Ank3	-2.74378	1.70439e-06	3.40775e-05	down	UCSC_knowngene	7274	chr10:69989935-70027436+	exon sense-overlapping	ENSMUST00000183074	Ank3	chr10:69925773-70024882+
chr16	31428581	31429100	diffreps_peak_00052268	6.02345	519	ENSMUST00000182690	Gm15743	-2.50314	9.47433e-07	2.07809e-05	down	Ensembl	1901	chr16:31427876-31429776-	intronic antisense	NM_175177	Bdh1	chr16:31422297-31458901+
chr10	88381701	88382180	diffreps_peak_00014300	5.02421	479	ENSMUST00000181000	Gm26546	-10.2651	9.45778e-06	0.000145318	down	Ensembl	4276	chr10:88379244-88383711-	intronic antisense	NM_001004164	Gnptab	chr10:88379412-88447329+
chr10	116473821	116474387	diffreps_peak_00015394	7.39761	566	NR_130644	Kcnmb4os2	-2.22347	4.00302e-08	1.77032e-06	down	RefSeq	1615	chr10:116473163-116474986+	natural antisense	ENSMUST00000068233	Kcnmb4	chr10:116417861-116473878-
chr10	34297342	34297760	diffreps_peak_00010706	6.06173	418	ENSMUST00000181185	Gm26564	-2.02498	8.67509e-07	1.93465e-05	down	Ensembl	2777	chr10:34295912-34298907-	natural antisense	ENSMUST00000047935	Tspyl4	chr10:34297421-34301308+
chr9	47799159	47799500	diffreps_peak_00140276	5.92075	341	NR_046048	Gm10677	-2.49704	1.20019e-06	2.53225e-05	down	RefSeq	2102	chr9:47799160-47818208-	natural antisense	ENSMUST00000152459	Cadm1	chr9:47530211-47850587+
chr10	69990561	69991120	diffreps_peak_00012267	5.76843	559	uc007fnn.1	Ank3	-2.74378	1.70439e-06	3.40775e-05	down	UCSC_knowngene	7274	chr10:69989935-70027436+	exon sense-overlapping	ENSMUST00000183148	Ank3	chr10:69533847-70024882+
chr10	69990561	69991120	diffreps_peak_00012267	5.76843	559	uc007fnn.1	Ank3	-2.74378	1.70439e-06	3.40775e-05	down	UCSC_knowngene	7274	chr10:69989935-70027436+	exon sense-overlapping	ENSMUST00000054167	Ank3	chr10:69534222-70015633+
chr10	69990561	69991120	diffreps_peak_00012267	5.76843	559	uc007fnn.1	Ank3	-2.74378	1.70439e-06	3.40775e-05	down	UCSC_knowngene	7274	chr10:69989935-70027436+	exon sense-overlapping	ENSMUST00000182029	Ank3	chr10:69925805-70015805+
chr10	69990561	69991120	diffreps_peak_00012267	5.76843	559	uc007fnn.1	Ank3	-2.74378	1.70439e-06	3.40775e-05	down	UCSC_knowngene	7274	chr10:69989935-70027436+	exon sense-overlapping	ENSMUST00000183169	Ank3	chr10:69533847-70024882+
chr13	83524855	83525360	diffreps_peak_00036759	7.89147	505	uc007rig.1	AK043267	-2.98755	1.2839e-08	8.05549e-07	down	UCSC_knowngene	2484	chr13:83524856-83527339+	intron sense-overlapping	ENSMUST00000163888	Mef2c	chr13:83504034-83667079+
chr2	148706681	148707023	diffreps_peak_00079189	6.74946	342	ENSMUST00000140647	Napb	-2.51963	1.78048e-07	5.43111e-06	down	Ensembl	3087	chr2:148706418-148732391-	exon sense-overlapping	NM_019632	Napb	chr2:148694657-148732420-
chr10	69990561	69991120	diffreps_peak_00012267	5.76843	559	uc007fnn.1	Ank3	-2.74378	1.70439e-06	3.40775e-05	down	UCSC_knowngene	7274	chr10:69989935-70027436+	exon sense-overlapping	NM_170689	Ank3	chr10:69533708-70027436+
chr14	55560401	55560860	diffreps_peak_00041051	6.83057	459	ENSMUST00000129310	Dcaf11	-4.15272	1.47716e-07	4.67917e-06	down	Ensembl	7271	chr14:55560121-55569535+	exon sense-overlapping	ENSMUST00000133256	Dcaf11	chr14:55560025-55562933+
chr2	65853261	65853720	diffreps_peak_00075007	6.36213	459	ENSMUST00000155722	Gm13619	-2.96125	4.34384e-07	1.10146e-05	down	Ensembl	2138	chr2:65852408-65860619-	intronic antisense	ENSMUST00000053910	Csrnp3	chr2:65845842-66025606+
chr4	95967161	95967540	diffreps_peak_00093101	6.44273	379	NR_045776	9530080O11Rik	-2.56843	3.60799e-07	9.52006e-06	down	RefSeq	1479	chr4:95959711-95967655-	natural antisense	ENSMUST00000107083	Hook1	chr4:95967369-95999538+
chr19	6408301	6408660	diffreps_peak_00067614	5.1836	359	ENSMUST00000152022	Rasgrp2	-3.39902	6.55244e-06	0.00010555	down	Ensembl	8815	chr19:6404827-6414041+	exon sense-overlapping	NM_011242	Rasgrp2	chr19:6400583-6415216+
chr2	181680309	181680620	diffreps_peak_00082430	6.22615	311	ENSMUST00000129686	Tcea2	-2.48617	5.94084e-07	1.41488e-05	down	Ensembl	2167	chr2:181680310-181687347+	exon sense-overlapping	ENSMUST00000103042	Tcea2	chr2:181680310-181688071+
chr9	47799159	47799500	diffreps_peak_00140276	5.92075	341	NR_046048	Gm10677	-2.49704	1.20019e-06	2.53225e-05	down	RefSeq	2102	chr9:47799160-47818208-	natural antisense	ENSMUST00000114547	Cadm1	chr9:47530257-47853380+
chr15	89531061	89531418	diffreps_peak_00048668	8.5758	357	ENSMUST00000123799	Shank3	-4.8257	2.65584e-09	2.85057e-07	down	Ensembl	911	chr15:89530796-89532408+	exon sense-overlapping	NM_021423	Shank3	chr15:89499857-89560260+
chr10	108636550	108636920	diffreps_peak_00015089	6.17715	370	ENSMUST00000147593	Syt1	-3.0269	6.65042e-07	1.55369e-05	down	Ensembl	717	chr10:108627286-108636964-	exon sense-overlapping	NM_001252341	Syt1	chr10:108497650-109010975-
chr7	4710421	4710740	diffreps_peak_00118371	8.99182	319	ENSMUST00000123637	Brsk1	-2.58086	1.01901e-09	1.4167e-07	down	Ensembl	610	chr7:4708978-4710992+	natural antisense	NM_177887	Tmem150b	chr7:4706832-4725251-
chr8	71660340	71660649	diffreps_peak_00132767	7.07678	309	ENSMUST00000176777	Unc13a	-2.5558	8.37953e-08	3.04586e-06	down	Ensembl	944	chr8:71660341-71671741-	exon sense-overlapping	NM_001029873	Unc13a	chr8:71626712-71671757-
chr4	41773735	41774169	diffreps_peak_00090761	6.25334	434	ENSMUST00000130197	Ccl27a	-2.19098	5.5803e-07	1.34846e-05	down	Ensembl	657	chr4:41773188-41774169-	exon sense-overlapping	NM_001164044	Ccl27a	chr4:41772895-41774176-
chr16	31428581	31429100	diffreps_peak_00052268	6.02345	519	ENSMUST00000182690	Gm15743	-2.50314	9.47433e-07	2.07809e-05	down	Ensembl	1901	chr16:31427876-31429776-	intronic antisense	ENSMUST00000089759	Bdh1	chr16:31422280-31457497+
chr13	83524855	83525360	diffreps_peak_00036759	7.89147	505	uc007rig.1	AK043267	-2.98755	1.2839e-08	8.05549e-07	down	UCSC_knowngene	2484	chr13:83524856-83527339+	intron sense-overlapping	NM_001170537	Mef2c	chr13:83504034-83667079+
chr10	69990561	69991120	diffreps_peak_00012267	5.76843	559	uc007fnn.1	Ank3	-2.74378	1.70439e-06	3.40775e-05	down	UCSC_knowngene	7274	chr10:69989935-70027436+	exon sense-overlapping	ENSMUST00000182207	Ank3	chr10:69980323-70024882+
chr10	76531681	76532018	diffreps_peak_00012745	6.7702	337	ENSMUST00000159172	Lss	-2.04423	1.69744e-07	5.22513e-06	down	Ensembl	641	chr10:76531682-76535723+	exon sense-overlapping	ENSMUST00000048678	Lss	chr10:76531607-76555479+
chr10	116473821	116474387	diffreps_peak_00015394	7.39761	566	NR_130644	Kcnmb4os2	-2.22347	4.00302e-08	1.77032e-06	down	RefSeq	1615	chr10:116473163-116474986+	natural antisense	NM_021452	Kcnmb4	chr10:116417868-116473523-
chr14	55560401	55560860	diffreps_peak_00041051	6.83057	459	ENSMUST00000129310	Dcaf11	-4.15272	1.47716e-07	4.67917e-06	down	Ensembl	7271	chr14:55560121-55569535+	exon sense-overlapping	ENSMUST00000143431	Dcaf11	chr14:55560518-55561443+
chr9	47799159	47799500	diffreps_peak_00140276	5.92075	341	NR_046048	Gm10677	-2.49704	1.20019e-06	2.53225e-05	down	RefSeq	2102	chr9:47799160-47818208-	natural antisense	ENSMUST00000143026	Cadm1	chr9:47530244-47857637+
chr4	141006301	141006740	diffreps_peak_00097776	6.38276	439	ENSMUST00000151517	Atp13a2	-2.12718	4.14229e-07	1.05888e-05	down	Ensembl	4266	chr4:140986900-141007330+	exon sense-overlapping	ENSMUST00000127833	Atp13a2	chr4:140986873-141007330+
chr10	69990561	69991120	diffreps_peak_00012267	5.76843	559	uc007fnn.1	Ank3	-2.74378	1.70439e-06	3.40775e-05	down	UCSC_knowngene	7274	chr10:69989935-70027436+	exon sense-overlapping	ENSMUST00000092432	Ank3	chr10:69534222-70015633+
chr10	76531681	76532018	diffreps_peak_00012745	6.7702	337	ENSMUST00000159172	Lss	-2.04423	1.69744e-07	5.22513e-06	down	Ensembl	641	chr10:76531682-76535723+	exon sense-overlapping	NM_146006	Lss	chr10:76531605-76557139+
chr8	71660340	71660649	diffreps_peak_00132767	7.07678	309	ENSMUST00000176777	Unc13a	-2.5558	8.37953e-08	3.04586e-06	down	Ensembl	944	chr8:71660341-71671741-	exon sense-overlapping	ENSMUST00000177517	Unc13a	chr8:71629054-71671736-
chr2	37672521	37672880	diffreps_peak_00073928	10.1769	359	ENSMUST00000121230	Gm13543	-7.827	6.6546e-11	1.81716e-08	down	Ensembl	796	chr2:37672208-37673003+	intronic antisense	ENSMUST00000072186	Strbp	chr2:37583156-37703275-
chr14	55560401	55560860	diffreps_peak_00041051	6.83057	459	ENSMUST00000129310	Dcaf11	-4.15272	1.47716e-07	4.67917e-06	down	Ensembl	7271	chr14:55560121-55569535+	exon sense-overlapping	ENSMUST00000150481	Dcaf11	chr14:55560533-55564403+
chr10	88381701	88382180	diffreps_peak_00014300	5.02421	479	ENSMUST00000181000	Gm26546	-10.2651	9.45778e-06	0.000145318	down	Ensembl	4276	chr10:88379244-88383711-	natural antisense	ENSMUST00000020251	Gnptab	chr10:88379226-88447329+
chr15	89531061	89531418	diffreps_peak_00048668	8.5758	357	ENSMUST00000123799	Shank3	-4.8257	2.65584e-09	2.85057e-07	down	Ensembl	911	chr15:89530796-89532408+	exon sense-overlapping	ENSMUST00000109309	Shank3	chr15:89499623-89560261+
chr12	109563261	109564260	diffreps_peak_00032482	5.52351	999	NR_003633	Meg3	-2.93131	2.99561e-06	5.45785e-05	down	RefSeq	11488	chr12:109545398-109568650+	intergenic	NA	NA	NA
chr2	65853261	65853720	diffreps_peak_00075007	6.36213	459	ENSMUST00000155722	Gm13619	-2.96125	4.34384e-07	1.10146e-05	down	Ensembl	2138	chr2:65852408-65860619-	intronic antisense	NM_178634	Csrnp3	chr2:65845767-66031546+
chr11	84906081	84906440	diffreps_peak_00022660	6.76131	359	ENSMUST00000141705	Myo19	-8.82787	1.73258e-07	5.31462e-06	down	Ensembl	5360	chr11:84880220-84911122+	natural antisense	NM_001077636	Pigw	chr11:84876313-84880285-
chr10	69990561	69991120	diffreps_peak_00012267	5.76843	559	uc007fnn.1	Ank3	-2.74378	1.70439e-06	3.40775e-05	down	UCSC_knowngene	7274	chr10:69989935-70027436+	exon sense-overlapping	ENSMUST00000182692	Ank3	chr10:69925495-70023957+
chr9	47799159	47799500	diffreps_peak_00140276	5.92075	341	NR_046048	Gm10677	-2.49704	1.20019e-06	2.53225e-05	down	RefSeq	2102	chr9:47799160-47818208-	natural antisense	NM_001025600	Cadm1	chr9:47530352-47853385+
chr6	126740561	126740960	diffreps_peak_00117027	6.18739	399	ENSMUST00000181126	Gm26673	-3.59769	6.49549e-07	1.52233e-05	down	Ensembl	3377	chr6:126718684-126741601+	natural antisense	NM_013568	Kcna6	chr6:126708329-126740674-
chr13	83524855	83525360	diffreps_peak_00036759	7.89147	505	uc007rig.1	AK043267	-2.98755	1.2839e-08	8.05549e-07	down	UCSC_knowngene	2484	chr13:83524856-83527339+	intron sense-overlapping	NM_025282	Mef2c	chr13:83504034-83667079+
chr16	31428581	31429100	diffreps_peak_00052268	6.02345	519	ENSMUST00000182690	Gm15743	-2.50314	9.47433e-07	2.07809e-05	down	Ensembl	1901	chr16:31427876-31429776-	natural antisense	ENSMUST00000115226	Bdh1	chr16:31429299-31457222+
chrX	71440281	71440611	diffreps_peak_00146774	7.45701	330	ENSMUST00000128515	Cd99l2	-7.90816	3.49132e-08	1.60708e-06	down	Ensembl	1609	chrX:71439335-71492649-	exon sense-overlapping	NM_001199349	Cd99l2	chrX:71420060-71492849-
chr4	41773735	41774169	diffreps_peak_00090761	6.25334	434	ENSMUST00000130197	Ccl27a	-2.19098	5.5803e-07	1.34846e-05	down	Ensembl	657	chr4:41773188-41774169-	exon sense-overlapping	ENSMUST00000108032	Ccl27a	chr4:41773188-41774158-
chr19	6408301	6408660	diffreps_peak_00067614	5.1836	359	ENSMUST00000152022	Rasgrp2	-3.39902	6.55244e-06	0.00010555	down	Ensembl	8815	chr19:6404827-6414041+	exon sense-overlapping	ENSMUST00000167240	Rasgrp2	chr19:6400583-6415215+
chr10	116473821	116474387	diffreps_peak_00015394	7.39761	566	NR_130644	Kcnmb4os2	-2.22347	4.00302e-08	1.77032e-06	down	RefSeq	1615	chr10:116473163-116474986+	natural antisense	ENSMUST00000087965	Kcnmb4	chr10:116462646-116473422-
chr4	49059272	49059580	diffreps_peak_00091592	6.42962	308	ENSMUST00000137884	E130309F12Rik	-2.04413	3.7186e-07	9.75977e-06	down	Ensembl	2558	chr4:49059273-49208600+	exon sense-overlapping	NM_178756	Lppr1	chr4:49059462-49340261+
chr2	65853261	65853720	diffreps_peak_00075007	6.36213	459	ENSMUST00000155722	Gm13619	-2.96125	4.34384e-07	1.10146e-05	down	Ensembl	2138	chr2:65852408-65860619-	intronic antisense	NM_001290666	Csrnp3	chr2:65845767-66031546+
chr14	55560401	55560860	diffreps_peak_00041051	6.83057	459	ENSMUST00000129310	Dcaf11	-4.15272	1.47716e-07	4.67917e-06	down	Ensembl	7271	chr14:55560121-55569535+	exon sense-overlapping	ENSMUST00000128490	Dcaf11	chr14:55560971-55563780+
chr18	31447321	31447700	diffreps_peak_00063353	8.11401	379	ENSMUST00000181067	Gm26658	-3.82975	7.69108e-09	5.78631e-07	down	Ensembl	2500	chr18:31440318-31449099+	natural antisense	NM_009308	Syt4	chr18:31437808-31447415-
chr7	4710421	4710740	diffreps_peak_00118371	8.99182	319	ENSMUST00000123637	Brsk1	-2.58086	1.01901e-09	1.4167e-07	down	Ensembl	610	chr7:4708978-4710992+	exon sense-overlapping	ENSMUST00000120836	Brsk1	chr7:4690604-4715981+
chr12	105382121	105382500	diffreps_peak_00032167	5.55204	379	NR_045047	Tunar	-5.46667	2.80516e-06	5.16542e-05	down	RefSeq	3302	chr12:105336594-105383932+	intergenic	NA	NA	NA
chr4	49059272	49059580	diffreps_peak_00091592	6.42962	308	ENSMUST00000137884	E130309F12Rik	-2.04413	3.7186e-07	9.75977e-06	down	Ensembl	2558	chr4:49059273-49208600+	exon sense-overlapping	ENSMUST00000076670	E130309F12Rik	chr4:49059282-49340259+
chr14	55560401	55560860	diffreps_peak_00041051	6.83057	459	ENSMUST00000129310	Dcaf11	-4.15272	1.47716e-07	4.67917e-06	down	Ensembl	7271	chr14:55560121-55569535+	exon sense-overlapping	ENSMUST00000072530	Dcaf11	chr14:55560929-55570062+
chr7	4710421	4710740	diffreps_peak_00118371	8.99182	319	ENSMUST00000123637	Brsk1	-2.58086	1.01901e-09	1.4167e-07	down	Ensembl	610	chr7:4708978-4710992+	exon sense-overlapping	NM_001003920	Brsk1	chr7:4690928-4715997+

## Sheet: Up-OGDR1.5h_vs_control
Chromosome	Transcript start	Transcript end	Peak ID	Score	Peak length	Transcript ID	Gene mame	Fold change	P value	FDR	Regulation	Source	RNA length	Coordinates	Relationship	Associated gene ID	Associated gene name	Associated gene coordinates
chr11	32213821	32214304	diffreps_peak_00019219	5.09154	483	ENSMUST00000143036	Rhbdf1	2.19395	8.09954e-06	0.000168458	up	Ensembl	5089	chr11:32209586-32217317-	exon sense-overlapping	NM_010117	Rhbdf1	chr11:32209585-32222293-
chr12	3805801	3806160	diffreps_peak_00029000	7.85805	359	uc007mwz.1	BC048080	14.5588	1.38661e-08	1.25787e-06	up	UCSC_knowngene	2910	chr12:3803312-3806221-	bidirectional	ENSMUST00000172719	Dnmt3a	chr12:3806527-3873381+
chr7	24917894	24918280	diffreps_peak_00126016	8.55744	386	ENSMUST00000144714	Arhgef1	4.20194	2.77051e-09	4.29464e-07	up	Ensembl	1087	chr7:24912617-24918392+	exon sense-overlapping	ENSMUST00000098683	Arhgef1	chr7:24903051-24926589+
chr8	122483041	122483600	diffreps_peak_00143716	8.46242	559	ENSMUST00000123671	Piezo1	3.93229	3.44811e-09	4.98667e-07	up	Ensembl	2860	chr8:122481721-122484780-	exon sense-overlapping	ENSMUST00000156333	Piezo1	chr8:122481712-122499886-
chr15	81953081	81953504	diffreps_peak_00050353	7.84333	423	ENSMUST00000129406	Pmm1	7.45848	1.43441e-08	1.28194e-06	up	Ensembl	1107	chr15:81951402-81953504-	exon sense-overlapping	NM_013872	Pmm1	chr15:81951106-81960930-
chr7	45381881	45382240	diffreps_peak_00128351	5.07507	359	NR_126538	Snrnp70	2.19764	8.41263e-06	0.000173289	up	RefSeq	3111	chr7:45376454-45395742-	exon sense-overlapping	ENSMUST00000074575	Snrnp70	chr7:45376462-45395692-
chr7	127979161	127979620	diffreps_peak_00134449	7.06906	459	uc009jxs.1	AK134717	2.39825	8.52985e-08	4.63659e-06	up	UCSC_knowngene	1514	chr7:127978141-127979654+	exon sense-overlapping	ENSMUST00000077609	Fus	chr7:127967490-127982032+
chr11	114066141	114066860	diffreps_peak_00027336	9.05594	719	ENSMUST00000144301	Sdk2	2.50133	8.79151e-10	1.94487e-07	up	Ensembl	3083	chr11:113941423-114067029-	exon sense-overlapping	ENSMUST00000141943	Sdk2	chr11:113848562-114065975-
chr4	43631538	43631851	diffreps_peak_00095997	7.20203	313	ENSMUST00000137535	Gm12473	2.17859	6.28019e-08	3.70387e-06	up	Ensembl	579	chr4:43631539-43641533-	natural antisense	NM_173788	Npr2	chr4:43631935-43651240+
chr6	34685962	34686340	diffreps_peak_00117740	10.0406	378	ENSMUST00000155714	Cald1	4.01758	9.10647e-11	3.71006e-08	up	Ensembl	1422	chr6:34598544-34687173+	exon sense-overlapping	ENSMUST00000115027	Cald1	chr6:34598564-34775466+
chrM	7009	7340	diffreps_peak_00153228	5.88499	331	uc009vez.1	Cox2	2.18892	1.30318e-06	3.9204e-05	up	UCSC_knowngene	690	chrM:7010-7699+	exon sense-overlapping	ENSMUST00000082405	mt-Co2	chrM:7013-7696+
chr18	23774341	23774660	diffreps_peak_00066410	5.76852	319	ENSMUST00000132286	Mapre2	14.3036	1.70406e-06	4.8427e-05	up	Ensembl	2169	chr18:23752333-23774684+	exon sense-overlapping	ENSMUST00000115830	Mapre2	chr18:23753725-23892364+
chr7	24917894	24918280	diffreps_peak_00126016	8.55744	386	ENSMUST00000144714	Arhgef1	4.20194	2.77051e-09	4.29464e-07	up	Ensembl	1087	chr7:24912617-24918392+	exon sense-overlapping	NM_001130151	Arhgef1	chr7:24902986-24926591+
chr7	143713495	143713800	diffreps_peak_00135566	5.75393	305	ENSMUST00000153864	Osbpl5	2.12812	1.76226e-06	4.97617e-05	up	Ensembl	700	chr7:143713496-143740299-	exon sense-overlapping	NM_001199227	Osbpl5	chr7:143688762-143740360-
chr17	33919870	33920375	diffreps_peak_00061758	6.58592	505	ENSMUST00000172888	Tapbp	2.11323	2.59468e-07	1.11006e-05	up	Ensembl	718	chr17:33919512-33920375+	exon sense-overlapping	NM_001025313	Tapbp	chr17:33919478-33929290+
chr7	24917894	24918280	diffreps_peak_00126016	8.55744	386	ENSMUST00000144714	Arhgef1	4.20194	2.77051e-09	4.29464e-07	up	Ensembl	1087	chr7:24912617-24918392+	exon sense-overlapping	NM_001130152	Arhgef1	chr7:24904346-24926591+
chr8	25675261	25675742	diffreps_peak_00137502	7.86116	481	uc009lgo.1	Whsc1l1	2.81241	1.37671e-08	1.25328e-06	up	UCSC_knowngene	2577	chr8:25674436-25677972+	exon sense-overlapping	ENSMUST00000146919	Whsc1l1	chr8:25602284-25677972+
chr7	119827541	119827860	diffreps_peak_00133451	6.41247	319	ENSMUST00000155938	2610020H08Rik	16.1111	3.86839e-07	1.50567e-05	up	Ensembl	796	chr7:119825551-119828010+	exon sense-overlapping	NM_028129	2610020H08Rik	chr7:119794130-119848938+
chr5	24429141	24429578	diffreps_peak_00106035	9.39705	437	ENSMUST00000155636	Slc4a2	2.15299	4.00818e-10	1.09708e-07	up	Ensembl	637	chr5:24429018-24429779+	exon sense-overlapping	ENSMUST00000141966	Slc4a2	chr5:24423859-24429882+
chr7	29791021	29791580	diffreps_peak_00127093	8.35486	559	ENSMUST00000126504	Zfp30	22.8228	4.4171e-09	5.9085e-07	up	Ensembl	3707	chr7:29784023-29791912+	exon sense-overlapping	ENSMUST00000122387	Zfp30	chr7:29784084-29794702+
chr12	3805801	3806160	diffreps_peak_00029000	7.85805	359	uc007mwz.1	BC048080	14.5588	1.38661e-08	1.25787e-06	up	UCSC_knowngene	2910	chr12:3803312-3806221-	bidirectional	uc007mxb.1	Dnmt3a	chr12:3806980-3914443+
chr18	5592801	5593320	diffreps_peak_00065773	9.73712	519	ENSMUST00000161096	Gm10125	7.31611	1.8318e-10	6.11937e-08	up	Ensembl	3491	chr18:5565652-5593505-	intronic antisense	ENSMUST00000159390	Zeb1	chr18:5591891-5766533+
chr1	74393277	74393901	diffreps_peak_00003308	7.70708	624	ENSMUST00000141175	Ctdsp1	2.30349	1.96301e-08	1.61491e-06	up	Ensembl	2957	chr1:74391795-74397282+	exon sense-overlapping	NM_153088	Ctdsp1	chr1:74391609-74397285+
chr11	3352501	3352817	diffreps_peak_00017723	5.51748	316	ENSMUST00000148771	Limk2	4.66667	3.03751e-06	7.74504e-05	up	Ensembl	716	chr11:3350392-3352817-	exon sense-overlapping	ENSMUST00000101638	Limk2	chr11:3344256-3409174-
chr2	128660804	128661140	diffreps_peak_00082319	7.25555	336	ENSMUST00000123503	Anapc1	17.7288	5.55205e-08	3.40037e-06	up	Ensembl	3261	chr2:128657721-128663177-	exon sense-overlapping	ENSMUST00000014499	Anapc1	chr2:128610104-128687391-
chr11	3531181	3531800	diffreps_peak_00017765	9.5213	619	ENSMUST00000123459	Gm11946	3.50107	3.01095e-10	8.89085e-08	up	Ensembl	3941	chr11:3530948-3536856+	natural antisense	NM_001284427	Smtn	chr11:3517522-3539292-
chr11	3352501	3352817	diffreps_peak_00017723	5.51748	316	ENSMUST00000148771	Limk2	4.66667	3.03751e-06	7.74504e-05	up	Ensembl	716	chr11:3350392-3352817-	exon sense-overlapping	NM_010718	Limk2	chr11:3343297-3409238-
chr18	73863630	73864220	diffreps_peak_00069566	7.53225	590	ENSMUST00000139821	Mro	3.09871	2.93593e-08	2.15723e-06	up	Ensembl	1877	chr18:73863631-73870209+	exon sense-overlapping	NM_027741	Mro	chr18:73859387-73879134+
chr3	89421161	89421640	diffreps_peak_00090524	7.68526	479	ENSMUST00000153334	Shc1	12.049	2.06415e-08	1.66996e-06	up	Ensembl	2775	chr3:89420633-89424043+	exon sense-overlapping	ENSMUST00000137793	Shc1	chr3:89421642-89426702+
chr19	55742881	55743197	diffreps_peak_00074482	7.33197	316	ENSMUST00000133008	Tcf7l2	3.99822	4.65618e-08	2.99209e-06	up	Ensembl	691	chr19:55742845-55910681+	exon sense-overlapping	ENSMUST00000111646	Tcf7l2	chr19:55895510-55933229+
chr7	24919221	24919640	diffreps_peak_00126020	6.80687	419	ENSMUST00000129928	Arhgef1	2.20107	1.56003e-07	7.40027e-06	up	Ensembl	777	chr7:24919202-24922379+	exon sense-overlapping	ENSMUST00000047873	Arhgef1	chr7:24903037-24926589+
chr19	55742881	55743197	diffreps_peak_00074482	7.33197	316	ENSMUST00000133008	Tcf7l2	3.99822	4.65618e-08	2.99209e-06	up	Ensembl	691	chr19:55742845-55910681+	exon sense-overlapping	ENSMUST00000142291	Tcf7l2	chr19:55894534-55918966+
chr11	32213821	32214304	diffreps_peak_00019219	5.09154	483	ENSMUST00000143036	Rhbdf1	2.19395	8.09954e-06	0.000168458	up	Ensembl	5089	chr11:32209586-32217317-	exon sense-overlapping	ENSMUST00000150381	Rhbdf1	chr11:32215068-32222244-
chr9	57095247	57095581	diffreps_peak_00148484	7.48182	334	ENSMUST00000165927	Sin3a	2.16236	3.29745e-08	2.33174e-06	up	Ensembl	641	chr9:57095248-57097880+	exon sense-overlapping	ENSMUST00000167715	Sin3a	chr9:57075338-57128366+
chr7	24919221	24919640	diffreps_peak_00126020	6.80687	419	ENSMUST00000129928	Arhgef1	2.20107	1.56003e-07	7.40027e-06	up	Ensembl	777	chr7:24919202-24922379+	exon sense-overlapping	ENSMUST00000117796	Arhgef1	chr7:24902912-24926592+
chr1	74393277	74393901	diffreps_peak_00003308	7.70708	624	ENSMUST00000141175	Ctdsp1	2.30349	1.96301e-08	1.61491e-06	up	Ensembl	2957	chr1:74391795-74397282+	exon sense-overlapping	ENSMUST00000027367	Ctdsp1	chr1:74391509-74397285+
chr12	3805801	3806160	diffreps_peak_00029000	7.85805	359	uc007mwz.1	BC048080	14.5588	1.38661e-08	1.25787e-06	up	UCSC_knowngene	2910	chr12:3803312-3806221-	bidirectional	NM_001271753	Dnmt3a	chr12:3807160-3914443+
chr11	3531181	3531800	diffreps_peak_00017765	9.5213	619	ENSMUST00000123459	Gm11946	3.50107	3.01095e-10	8.89085e-08	up	Ensembl	3941	chr11:3530948-3536856+	natural antisense	ENSMUST00000020721	Smtn	chr11:3517523-3539292-
chr9	57095247	57095581	diffreps_peak_00148484	7.48182	334	ENSMUST00000165927	Sin3a	2.16236	3.29745e-08	2.33174e-06	up	Ensembl	641	chr9:57095248-57097880+	exon sense-overlapping	ENSMUST00000049169	Sin3a	chr9:57086581-57128366+
chr6	86526481	86526980	diffreps_peak_00120344	5.23067	499	uc009csd.1	1600020E01Rik	2.2304	5.87934e-06	0.00013054	up	UCSC_knowngene	2099	chr6:86526271-86564449+	bidirectional	NM_011865	Pcbp1	chr6:86524497-86526165-
chr9	57095247	57095581	diffreps_peak_00148484	7.48182	334	ENSMUST00000165927	Sin3a	2.16236	3.29745e-08	2.33174e-06	up	Ensembl	641	chr9:57095248-57097880+	exon sense-overlapping	ENSMUST00000168678	Sin3a	chr9:57076376-57128364+
chr15	81953081	81953504	diffreps_peak_00050353	7.84333	423	ENSMUST00000129406	Pmm1	7.45848	1.43441e-08	1.28194e-06	up	Ensembl	1107	chr15:81951402-81953504-	exon sense-overlapping	NM_001282040	Pmm1	chr15:81951106-81960930-
chr5	137633848	137634180	diffreps_peak_00114820	5.49809	332	ENSMUST00000176988	Lrch4	3.866	3.17622e-06	8.02481e-05	up	Ensembl	891	chr5:137629143-137636799+	exon sense-overlapping	ENSMUST00000031734	Lrch4	chr5:137629121-137641094+
chr1	171275081	171275460	diffreps_peak_00008278	7.33337	379	ENSMUST00000132890	B4galt3	87.7	4.64123e-08	2.98435e-06	up	Ensembl	3261	chr1:171273515-171276894+	exon sense-overlapping	ENSMUST00000111313	B4galt3	chr1:171270343-171276896+
chr7	24917894	24918280	diffreps_peak_00126016	8.55744	386	ENSMUST00000144714	Arhgef1	4.20194	2.77051e-09	4.29464e-07	up	Ensembl	1087	chr7:24912617-24918392+	exon sense-overlapping	ENSMUST00000047873	Arhgef1	chr7:24903037-24926589+
chr11	32213821	32214304	diffreps_peak_00019219	5.09154	483	ENSMUST00000143036	Rhbdf1	2.19395	8.09954e-06	0.000168458	up	Ensembl	5089	chr11:32209586-32217317-	exon sense-overlapping	NM_001291818	Rhbdf1	chr11:32209585-32222293-
chr5	137633848	137634180	diffreps_peak_00114820	5.49809	332	ENSMUST00000176988	Lrch4	3.866	3.17622e-06	8.02481e-05	up	Ensembl	891	chr5:137629143-137636799+	exon sense-overlapping	ENSMUST00000175968	Lrch4	chr5:137630130-137640180+
chr7	4752161	4752528	diffreps_peak_00124669	8.10185	367	ENSMUST00000182272	Cox6b2	3.42228	7.90947e-09	8.78993e-07	up	Ensembl	519	chr7:4751925-4752528-	exon sense-overlapping	ENSMUST00000182048	Cox6b2	chr7:4751855-4753038-
chr12	80112682	80113000	diffreps_peak_00032147	10.1178	318	ENSMUST00000181323	Gm26669	2.80167	7.62398e-11	3.26437e-08	up	Ensembl	1808	chr12:80108034-80113000+	natural antisense	ENSMUST00000021552	Zfp36l1	chr12:80107760-80113013-
chr10	12922701	12923040	diffreps_peak_00010381	7.30306	339	NR_038027	B230208H11Rik	80.1	4.97669e-08	3.13321e-06	up	RefSeq	1182	chr10:12916646-12923127-	intergenic	NA	NA	NA
chr17	79012581	79013080	diffreps_peak_00064821	5.96295	499	ENSMUST00000130070	Prkd3	5.05119	1.08906e-06	3.39435e-05	up	Ensembl	3508	chr17:79010127-79020777-	exon sense-overlapping	ENSMUST00000168887	Prkd3	chr17:78949405-79020816-
chr7	143713495	143713800	diffreps_peak_00135566	5.75393	305	ENSMUST00000153864	Osbpl5	2.12812	1.76226e-06	4.97617e-05	up	Ensembl	700	chr7:143713496-143740299-	exon sense-overlapping	ENSMUST00000121409	Osbpl5	chr7:143688762-143741963-
chr17	33919870	33920375	diffreps_peak_00061758	6.58592	505	ENSMUST00000172888	Tapbp	2.11323	2.59468e-07	1.11006e-05	up	Ensembl	718	chr17:33919512-33920375+	exon sense-overlapping	NM_009318	Tapbp	chr17:33919478-33929290+
chr18	65620381	65620700	diffreps_peak_00069071	8.1278	319	ENSMUST00000183157	Zfp532	30.7879	7.45072e-09	8.45988e-07	up	Ensembl	5267	chr18:65619660-65624926+	exon sense-overlapping	ENSMUST00000182973	Zfp532	chr18:65583937-65623193+
chr2	101797420	101797720	diffreps_peak_00080698	9.30069	300	ENSMUST00000140387	Prr5l	156	5.00393e-10	1.27542e-07	up	Ensembl	427	chr2:101772295-101797733-	exon sense-overlapping	ENSMUST00000171088	Prr5l	chr2:101714285-101797707-
chr18	23774341	23774660	diffreps_peak_00066410	5.76852	319	ENSMUST00000132286	Mapre2	14.3036	1.70406e-06	4.8427e-05	up	Ensembl	2169	chr18:23752333-23774684+	exon sense-overlapping	ENSMUST00000155708	Mapre2	chr18:23752339-23883696+
chr19	55742881	55743197	diffreps_peak_00074482	7.33197	316	ENSMUST00000133008	Tcf7l2	3.99822	4.65618e-08	2.99209e-06	up	Ensembl	691	chr19:55742845-55910681+	exon sense-overlapping	ENSMUST00000111658	Tcf7l2	chr19:55741884-55932715+
chr7	24917894	24918280	diffreps_peak_00126016	8.55744	386	ENSMUST00000144714	Arhgef1	4.20194	2.77051e-09	4.29464e-07	up	Ensembl	1087	chr7:24912617-24918392+	exon sense-overlapping	NM_001130150	Arhgef1	chr7:24902986-24926591+
chr8	25675261	25675742	diffreps_peak_00137502	7.86116	481	uc009lgo.1	Whsc1l1	2.81241	1.37671e-08	1.25328e-06	up	UCSC_knowngene	2577	chr8:25674436-25677972+	exon sense-overlapping	ENSMUST00000142395	Whsc1l1	chr8:25602284-25719667+
chrM	12405	14140	diffreps_peak_00153234	5.38111	1735	uc009vfc.1	Cytb	2.00844	4.15806e-06	9.9649e-05	up	UCSC_knowngene	2883	chrM:12406-15288+	exon sense-overlapping	ENSMUST00000082418	mt-Nd5	chrM:11742-13565+
chr17	56551541	56551940	diffreps_peak_00063630	7.23993	399	NR_130128	Gm20219	9.75758	5.75538e-08	3.48332e-06	up	RefSeq	1269	chr17:56551414-56554387-	intergenic	NA	NA	NA
chr7	24919221	24919640	diffreps_peak_00126020	6.80687	419	ENSMUST00000129928	Arhgef1	2.20107	1.56003e-07	7.40027e-06	up	Ensembl	777	chr7:24919202-24922379+	exon sense-overlapping	NM_001130151	Arhgef1	chr7:24902986-24926591+
chr4	43631538	43631851	diffreps_peak_00095997	7.20203	313	ENSMUST00000137535	Gm12473	2.17859	6.28019e-08	3.70387e-06	up	Ensembl	579	chr4:43631539-43641533-	natural antisense	ENSMUST00000123351	Npr2	chr4:43641262-43644379+
chr7	119827541	119827860	diffreps_peak_00133451	6.41247	319	ENSMUST00000155938	2610020H08Rik	16.1111	3.86839e-07	1.50567e-05	up	Ensembl	796	chr7:119825551-119828010+	exon sense-overlapping	ENSMUST00000106520	2610020H08Rik	chr7:119794010-119848943+
chr8	78869481	78869868	diffreps_peak_00140167	10.3328	387	ENSMUST00000093411	Gm8054	5.77657	4.64722e-11	2.42326e-08	up	Ensembl	468	chr8:78869401-78869868-	intergenic	NA	NA	NA
chr11	3531181	3531800	diffreps_peak_00017765	9.5213	619	ENSMUST00000123459	Gm11946	3.50107	3.01095e-10	8.89085e-08	up	Ensembl	3941	chr11:3530948-3536856+	natural antisense	NM_013870	Smtn	chr11:3517522-3539292-
chr18	73863630	73864220	diffreps_peak_00069566	7.53225	590	ENSMUST00000139821	Mro	3.09871	2.93593e-08	2.15723e-06	up	Ensembl	1877	chr18:73863631-73870209+	exon sense-overlapping	ENSMUST00000179472	Mro	chr18:73859387-73879134+
chr5	110386581	110387260	diffreps_peak_00110662	5.57965	679	ENSMUST00000180866	Gm26711	2.65366	2.6324e-06	6.87023e-05	up	Ensembl	1833	chr5:110385835-110388073+	intronic antisense	ENSMUST00000069483	Fbrsl1	chr5:110361754-110448503-
chr5	115544113	115544569	diffreps_peak_00111662	10.1739	456	ENSMUST00000134198	Pxn	2.3463	6.70044e-11	3.04973e-08	up	Ensembl	524	chr5:115544114-115544948+	exon sense-overlapping	ENSMUST00000086523	Pxn	chr5:115506808-115554978+
chr11	3531181	3531800	diffreps_peak_00017765	9.5213	619	ENSMUST00000123459	Gm11946	3.50107	3.01095e-10	8.89085e-08	up	Ensembl	3941	chr11:3530948-3536856+	natural antisense	NM_001284429	Smtn	chr11:3517522-3539292-
chr4	43518401	43518900	diffreps_peak_00095961	7.13014	499	ENSMUST00000150262	Tpm2	4.65952	7.41063e-08	4.17668e-06	up	Ensembl	1545	chr4:43514711-43523438-	exon sense-overlapping	ENSMUST00000107913	Tpm2	chr4:43514712-43523388-
chr3	75878645	75879000	diffreps_peak_00089544	8.43522	355	ENSMUST00000134219	Golim4	3.5282	3.67093e-09	5.21631e-07	up	Ensembl	2062	chr3:75876479-75879008-	exon sense-overlapping	NM_175193	Golim4	chr3:75876183-75956949-
chr5	24429141	24429578	diffreps_peak_00106035	9.39705	437	ENSMUST00000155636	Slc4a2	2.15299	4.00818e-10	1.09708e-07	up	Ensembl	637	chr5:24429018-24429779+	exon sense-overlapping	ENSMUST00000155598	Slc4a2	chr5:24426831-24429852+
chr11	90657701	90658208	diffreps_peak_00024638	5.9886	507	ENSMUST00000147329	Tom1l1	2.8566	1.02659e-06	3.23009e-05	up	Ensembl	2694	chr11:90657072-90663312-	exon sense-overlapping	ENSMUST00000107867	Tom1l1	chr11:90645690-90662999-
chr5	24429141	24429578	diffreps_peak_00106035	9.39705	437	ENSMUST00000155636	Slc4a2	2.15299	4.00818e-10	1.09708e-07	up	Ensembl	637	chr5:24429018-24429779+	exon sense-overlapping	ENSMUST00000115049	Slc4a2	chr5:24428208-24440947+
chr11	90657701	90658208	diffreps_peak_00024638	5.9886	507	ENSMUST00000147329	Tom1l1	2.8566	1.02659e-06	3.23009e-05	up	Ensembl	2694	chr11:90657072-90663312-	exon sense-overlapping	ENSMUST00000020849	Tom1l1	chr11:90643465-90687607-
chr3	89421161	89421640	diffreps_peak_00090524	7.68526	479	ENSMUST00000153334	Shc1	12.049	2.06415e-08	1.66996e-06	up	Ensembl	2775	chr3:89420633-89424043+	exon sense-overlapping	NM_001113331	Shc1	chr3:89421621-89430029+
chr6	72629955	72630270	diffreps_peak_00119553	6.52115	315	ENSMUST00000141743	Tcf7l1	2.68281	3.01199e-07	1.24276e-05	up	Ensembl	518	chr6:72627591-72630270-	exon sense-overlapping	NM_009332	Tcf7l1	chr6:72626371-72789045-
chr5	110386581	110387260	diffreps_peak_00110662	5.57965	679	ENSMUST00000180866	Gm26711	2.65366	2.6324e-06	6.87023e-05	up	Ensembl	1833	chr5:110385835-110388073+	natural antisense	NM_028596	Fbrsl1	chr5:110361752-110387127-
chr2	170406101	170406470	diffreps_peak_00085978	5.06076	369	ENSMUST00000133586	Gm14259	4.17704	8.69444e-06	0.000177977	up	Ensembl	1239	chr2:170405181-170407175+	natural antisense	ENSMUST00000109152	Bcas1	chr2:170346991-170427845-
chr3	145652061	145652472	diffreps_peak_00093498	7.10927	411	uc012czd.2	FJ422280	2.60785	7.77561e-08	4.31942e-06	up	UCSC_knowngene	1699	chr3:145650312-145652472+	bidirectional	uc008rqq.2	Cyr61	chr3:145646971-145649985-
chr4	43631538	43631851	diffreps_peak_00095997	7.20203	313	ENSMUST00000137535	Gm12473	2.17859	6.28019e-08	3.70387e-06	up	Ensembl	579	chr4:43631539-43641533-	natural antisense	ENSMUST00000128549	Npr2	chr4:43641284-43651244+
chr4	43518401	43518900	diffreps_peak_00095961	7.13014	499	ENSMUST00000150262	Tpm2	4.65952	7.41063e-08	4.17668e-06	up	Ensembl	1545	chr4:43514711-43523438-	exon sense-overlapping	NM_001277875	Tpm2	chr4:43513726-43523554-
chr18	23774341	23774660	diffreps_peak_00066410	5.76852	319	ENSMUST00000132286	Mapre2	14.3036	1.70406e-06	4.8427e-05	up	Ensembl	2169	chr18:23752333-23774684+	exon sense-overlapping	NM_001162941	Mapre2	chr18:23753725-23893861+
chr1	189833301	189833640	diffreps_peak_00009507	6.08476	339	ENSMUST00000181876	Gm26574	3.11641	8.22704e-07	2.70183e-05	up	Ensembl	2141	chr1:189833141-189836620-	natural antisense	ENSMUST00000027898	Ptpn14	chr1:189786633-189876695+
chr19	3897481	3897831	diffreps_peak_00070649	5.30542	350	ENSMUST00000134698	Tcirg1	3.45688	4.94976e-06	0.000113792	up	Ensembl	463	chr19:3897071-3897831-	exon sense-overlapping	ENSMUST00000126070	Tcirg1	chr19:3896050-3906991-
chr2	170406101	170406470	diffreps_peak_00085978	5.06076	369	ENSMUST00000133586	Gm14259	4.17704	8.69444e-06	0.000177977	up	Ensembl	1239	chr2:170405181-170407175+	natural antisense	ENSMUST00000013667	Bcas1	chr2:170347148-170427828-
chr7	24919221	24919640	diffreps_peak_00126020	6.80687	419	ENSMUST00000129928	Arhgef1	2.20107	1.56003e-07	7.40027e-06	up	Ensembl	777	chr7:24919202-24922379+	exon sense-overlapping	NM_001130152	Arhgef1	chr7:24904346-24926591+
chrM	12405	14140	diffreps_peak_00153234	5.38111	1735	uc009vfc.1	Cytb	2.00844	4.15806e-06	9.9649e-05	up	UCSC_knowngene	2883	chrM:12406-15288+	natural antisense	ENSMUST00000082419	mt-Nd6	chrM:13552-14070-
chr7	24917894	24918280	diffreps_peak_00126016	8.55744	386	ENSMUST00000144714	Arhgef1	4.20194	2.77051e-09	4.29464e-07	up	Ensembl	1087	chr7:24912617-24918392+	exon sense-overlapping	ENSMUST00000117796	Arhgef1	chr7:24902912-24926592+
chr4	43518401	43518900	diffreps_peak_00095961	7.13014	499	ENSMUST00000150262	Tpm2	4.65952	7.41063e-08	4.17668e-06	up	Ensembl	1545	chr4:43514711-43523438-	exon sense-overlapping	ENSMUST00000030184	Tpm2	chr4:43514711-43523464-
chr3	90258221	90258526	diffreps_peak_00090701	6.72758	305	ENSMUST00000135002	Crtc2	11.6383	1.87251e-07	8.54438e-06	up	Ensembl	652	chr3:90258051-90259492+	exon sense-overlapping	NM_028881	Crtc2	chr3:90254281-90264125+
chr2	101797420	101797720	diffreps_peak_00080698	9.30069	300	ENSMUST00000140387	Prr5l	156	5.00393e-10	1.27542e-07	up	Ensembl	427	chr2:101772295-101797733-	exon sense-overlapping	NM_175181	Prr5l	chr2:101714285-101797707-
chr3	89421161	89421640	diffreps_peak_00090524	7.68526	479	ENSMUST00000153334	Shc1	12.049	2.06415e-08	1.66996e-06	up	Ensembl	2775	chr3:89420633-89424043+	exon sense-overlapping	NM_011368	Shc1	chr3:89418551-89430029+
chr7	28370481	28370900	diffreps_peak_00126776	7.81853	419	uc009fyr.1	Plekhg2	3.23336	1.51871e-08	1.33458e-06	up	UCSC_knowngene	1954	chr7:28368679-28372662-	exon sense-overlapping	ENSMUST00000147362	Plekhg2	chr7:28368410-28371727-
chrX	20987041	20987349	diffreps_peak_00153885	5.14177	308	NR_027445	A230072C01Rik	6.54335	7.21484e-06	0.000154527	up	RefSeq	1795	chrX:20961676-20987349+	natural antisense	ENSMUST00000123836	Uxt	chrX:20951662-20962017-
chr9	57095247	57095581	diffreps_peak_00148484	7.48182	334	ENSMUST00000165927	Sin3a	2.16236	3.29745e-08	2.33174e-06	up	Ensembl	641	chr9:57095248-57097880+	exon sense-overlapping	NM_001110351	Sin3a	chr9:57072040-57128368+
chr16	91862821	91863200	diffreps_peak_00058143	8.74157	379	ENSMUST00000138117	Itsn1	35.0476	1.81312e-09	3.21973e-07	up	Ensembl	2818	chr16:91862026-91871347+	exon sense-overlapping	NM_010587	Itsn1	chr16:91729371-91920579+
chr1	45389101	45389680	diffreps_peak_00001963	7.93745	579	ENSMUST00000150143	Col5a2	5.61072	1.15492e-08	1.12702e-06	up	Ensembl	2951	chr1:45389031-45393634-	exon sense-overlapping	ENSMUST00000086430	Col5a2	chr1:45374321-45503282-
chr14	70486561	70486930	diffreps_peak_00044253	5.40173	369	NR_033241	Bmp1	4.32033	3.9652e-06	9.57889e-05	up	RefSeq	4464	chr14:70474555-70520260-	exon sense-overlapping	ENSMUST00000022693	Bmp1	chr14:70474557-70520260-
chr9	57095247	57095581	diffreps_peak_00148484	7.48182	334	ENSMUST00000165927	Sin3a	2.16236	3.29745e-08	2.33174e-06	up	Ensembl	641	chr9:57095248-57097880+	exon sense-overlapping	NM_001110350	Sin3a	chr9:57076376-57128368+
chr8	122483041	122483600	diffreps_peak_00143716	8.46242	559	ENSMUST00000123671	Piezo1	3.93229	3.44811e-09	4.98667e-07	up	Ensembl	2860	chr8:122481721-122484780-	intronic antisense	ENSMUST00000127664	Gm20388	chr8:119910841-124345722+
chr6	72629955	72630270	diffreps_peak_00119553	6.52115	315	ENSMUST00000141743	Tcf7l1	2.68281	3.01199e-07	1.24276e-05	up	Ensembl	518	chr6:72627591-72630270-	natural antisense	ENSMUST00000081929	Gm15401	chr6:72629837-72637366+
chr15	81953081	81953504	diffreps_peak_00050353	7.84333	423	ENSMUST00000129406	Pmm1	7.45848	1.43441e-08	1.28194e-06	up	Ensembl	1107	chr15:81951402-81953504-	exon sense-overlapping	ENSMUST00000023112	Pmm1	chr15:81951108-81960930-
chr2	128660804	128661140	diffreps_peak_00082319	7.25555	336	ENSMUST00000123503	Anapc1	17.7288	5.55205e-08	3.40037e-06	up	Ensembl	3261	chr2:128657721-128663177-	exon sense-overlapping	ENSMUST00000110333	Anapc1	chr2:128642077-128687376-
chr11	3352501	3352817	diffreps_peak_00017723	5.51748	316	ENSMUST00000148771	Limk2	4.66667	3.03751e-06	7.74504e-05	up	Ensembl	716	chr11:3350392-3352817-	exon sense-overlapping	NM_001034030	Limk2	chr11:3343297-3356141-
chr16	91862821	91863200	diffreps_peak_00058143	8.74157	379	ENSMUST00000138117	Itsn1	35.0476	1.81312e-09	3.21973e-07	up	Ensembl	2818	chr16:91862026-91871347+	exon sense-overlapping	ENSMUST00000113993	Itsn1	chr16:91729592-91870497+
chr16	91862821	91863200	diffreps_peak_00058143	8.74157	379	ENSMUST00000138117	Itsn1	35.0476	1.81312e-09	3.21973e-07	up	Ensembl	2818	chr16:91862026-91871347+	exon sense-overlapping	ENSMUST00000056482	Itsn1	chr16:91729371-91871655+
chr11	32213261	32213600	diffreps_peak_00019218	5.13475	339	ENSMUST00000143036	Rhbdf1	2.59475	7.33252e-06	0.000156557	up	Ensembl	5089	chr11:32209586-32217317-	exon sense-overlapping	ENSMUST00000143988	Rhbdf1	chr11:32209804-32211139-
chr17	28999801	29000120	diffreps_peak_00061031	7.39095	319	ENSMUST00000145298	Stk38	2.85125	4.06491e-08	2.72047e-06	up	Ensembl	2767	chr17:28997564-29007896-	exon sense-overlapping	NM_134115	Stk38	chr17:28970885-29007937-
chrX	142631482	142631800	diffreps_peak_00156447	5.63279	318	ENSMUST00000061991	Gm5763	13.9048	2.32924e-06	6.22456e-05	up	Ensembl	1599	chrX:142631483-142633135-	intergenic	NA	NA	NA
chr3	89421161	89421640	diffreps_peak_00090524	7.68526	479	ENSMUST00000153334	Shc1	12.049	2.06415e-08	1.66996e-06	up	Ensembl	2775	chr3:89420633-89424043+	exon sense-overlapping	ENSMUST00000094378	Shc1	chr3:89421628-89429099+
chr3	89421161	89421640	diffreps_peak_00090524	7.68526	479	ENSMUST00000153334	Shc1	12.049	2.06415e-08	1.66996e-06	up	Ensembl	2775	chr3:89420633-89424043+	exon sense-overlapping	ENSMUST00000107417	Shc1	chr3:89418614-89430015+
chr1	171275081	171275460	diffreps_peak_00008278	7.33337	379	ENSMUST00000132890	B4galt3	87.7	4.64123e-08	2.98435e-06	up	Ensembl	3261	chr1:171273515-171276894+	exon sense-overlapping	ENSMUST00000064272	B4galt3	chr1:171270328-171276895+
chr11	90657701	90658208	diffreps_peak_00024638	5.9886	507	ENSMUST00000147329	Tom1l1	2.8566	1.02659e-06	3.23009e-05	up	Ensembl	2694	chr11:90657072-90663312-	exon sense-overlapping	ENSMUST00000107869	Tom1l1	chr11:90645691-90687579-
chr15	77765421	77765828	diffreps_peak_00049482	8.30414	407	ENSMUST00000139729	Myh9	2.43183	4.9643e-09	6.3117e-07	up	Ensembl	723	chr15:77765328-77767190-	exon sense-overlapping	NM_022410	Myh9	chr15:77760585-77842175-
chr17	34601781	34602180	diffreps_peak_00061880	7.06118	399	ENSMUST00000174045	Rnf5	2.12772	8.686e-08	4.70276e-06	up	Ensembl	763	chr17:34601782-34603661-	exon sense-overlapping	ENSMUST00000015622	Rnf5	chr17:34601091-34603690-
chr9	107559261	107559720	diffreps_peak_00151639	8.88394	459	ENSMUST00000129320	Rassf1	100.7	1.30635e-09	2.58155e-07	up	Ensembl	2375	chr9:107557942-107560435+	exon sense-overlapping	ENSMUST00000121635	Rassf1	chr9:107556611-107562263+
chr18	65620381	65620700	diffreps_peak_00069071	8.1278	319	ENSMUST00000183157	Zfp532	30.7879	7.45072e-09	8.45988e-07	up	Ensembl	5267	chr18:65619660-65624926+	exon sense-overlapping	ENSMUST00000182319	Zfp532	chr18:65581093-65623076+
chr19	55742881	55743197	diffreps_peak_00074482	7.33197	316	ENSMUST00000133008	Tcf7l2	3.99822	4.65618e-08	2.99209e-06	up	Ensembl	691	chr19:55742845-55910681+	exon sense-overlapping	ENSMUST00000111656	Tcf7l2	chr19:55742332-55933654+
chr2	132260585	132260960	diffreps_peak_00082720	5.86847	375	ENSMUST00000124336	AV099323	9.30233	1.35371e-06	4.03391e-05	up	Ensembl	921	chr2:132253357-132261333+	bidirectional	uc008mml.1	Pcna	chr2:132249286-132253180-
chr7	4752161	4752528	diffreps_peak_00124669	8.10185	367	ENSMUST00000182272	Cox6b2	3.42228	7.90947e-09	8.78993e-07	up	Ensembl	519	chr7:4751925-4752528-	exon sense-overlapping	ENSMUST00000063324	Cox6b2	chr7:4751792-4753094-
chr7	4752161	4752528	diffreps_peak_00124669	8.10185	367	ENSMUST00000182272	Cox6b2	3.42228	7.90947e-09	8.78993e-07	up	Ensembl	519	chr7:4751925-4752528-	exon sense-overlapping	ENSMUST00000184143	Cox6b2	chr7:4751792-4753023-
chr18	73863630	73864220	diffreps_peak_00069566	7.53225	590	ENSMUST00000139821	Mro	3.09871	2.93593e-08	2.15723e-06	up	Ensembl	1877	chr18:73863631-73870209+	exon sense-overlapping	ENSMUST00000119239	Mro	chr18:73859402-73878730+
chr2	25466710	25467300	diffreps_peak_00076264	7.21817	590	ENSMUST00000144016	Ptgds	4.89385	6.05108e-08	3.59327e-06	up	Ensembl	1327	chr2:25466711-25469383-	exon sense-overlapping	ENSMUST00000015234	Ptgds	chr2:25466709-25469842-
chr1	131714461	131714780	diffreps_peak_00005889	5.6305	319	uc007cnr.1	5430435G22Rik	65.7	2.34151e-06	6.24954e-05	up	UCSC_knowngene	4104	chr1:131688695-131715439+	exon sense-overlapping	ENSMUST00000136247	5430435G22Rik	chr1:131688738-131711663+
chr16	91862821	91863200	diffreps_peak_00058143	8.74157	379	ENSMUST00000138117	Itsn1	35.0476	1.81312e-09	3.21973e-07	up	Ensembl	2818	chr16:91862026-91871347+	exon sense-overlapping	ENSMUST00000114002	Itsn1	chr16:91729353-91920597+
chr3	89421161	89421640	diffreps_peak_00090524	7.68526	479	ENSMUST00000153334	Shc1	12.049	2.06415e-08	1.66996e-06	up	Ensembl	2775	chr3:89420633-89424043+	exon sense-overlapping	ENSMUST00000154791	Shc1	chr3:89418571-89424244+
chr1	93829756	93830060	diffreps_peak_00004813	5.08411	304	ENSMUST00000141701	D2hgdh	8.136	8.23936e-06	0.000170621	up	Ensembl	689	chr1:93826562-93830308+	exon sense-overlapping	ENSMUST00000097633	D2hgdh	chr1:93825240-93852348+
chr15	81953081	81953504	diffreps_peak_00050353	7.84333	423	ENSMUST00000129406	Pmm1	7.45848	1.43441e-08	1.28194e-06	up	Ensembl	1107	chr15:81951402-81953504-	exon sense-overlapping	ENSMUST00000071462	Pmm1	chr15:81951108-81960869-
chr7	119827541	119827860	diffreps_peak_00133451	6.41247	319	ENSMUST00000155938	2610020H08Rik	16.1111	3.86839e-07	1.50567e-05	up	Ensembl	796	chr7:119825551-119828010+	exon sense-overlapping	ENSMUST00000033218	2610020H08Rik	chr7:119794006-119848943+
chrX	20987041	20987349	diffreps_peak_00153885	5.14177	308	NR_027445	A230072C01Rik	6.54335	7.21484e-06	0.000154527	up	RefSeq	1795	chrX:20961676-20987349+	natural antisense	NM_013840	Uxt	chrX:20951665-20961978-
chr11	90657701	90658208	diffreps_peak_00024638	5.9886	507	ENSMUST00000147329	Tom1l1	2.8566	1.02659e-06	3.23009e-05	up	Ensembl	2694	chr11:90657072-90663312-	exon sense-overlapping	NM_028011	Tom1l1	chr11:90645691-90687601-
chr19	55742881	55743197	diffreps_peak_00074482	7.33197	316	ENSMUST00000133008	Tcf7l2	3.99822	4.65618e-08	2.99209e-06	up	Ensembl	691	chr19:55742845-55910681+	exon sense-overlapping	ENSMUST00000061496	Tcf7l2	chr19:55741810-55933654+
chr7	24917894	24918280	diffreps_peak_00126016	8.55744	386	ENSMUST00000144714	Arhgef1	4.20194	2.77051e-09	4.29464e-07	up	Ensembl	1087	chr7:24912617-24918392+	exon sense-overlapping	NM_008488	Arhgef1	chr7:24902986-24926591+
chr8	61708701	61709067	diffreps_peak_00138902	6.6657	366	ENSMUST00000123523	Palld	3.99139	2.15925e-07	9.55079e-06	up	Ensembl	2487	chr8:61707212-61760089-	exon sense-overlapping	ENSMUST00000034057	Palld	chr8:61515021-61902690-
chr19	5844441	5845480	diffreps_peak_00071149	5.29759	1039	NR_003513	Neat1	2.39674	5.03976e-06	0.000115168	up	RefSeq	3190	chr19:5842296-5845480-	intergenic	NA	NA	NA
chr7	143713495	143713800	diffreps_peak_00135566	5.75393	305	ENSMUST00000153864	Osbpl5	2.12812	1.76226e-06	4.97617e-05	up	Ensembl	700	chr7:143713496-143740299-	exon sense-overlapping	ENSMUST00000119499	Osbpl5	chr7:143688762-143740341-
chr11	32213261	32213600	diffreps_peak_00019218	5.13475	339	ENSMUST00000143036	Rhbdf1	2.59475	7.33252e-06	0.000156557	up	Ensembl	5089	chr11:32209586-32217317-	exon sense-overlapping	ENSMUST00000144902	Rhbdf1	chr11:32216009-32222259-
chr3	89421161	89421640	diffreps_peak_00090524	7.68526	479	ENSMUST00000153334	Shc1	12.049	2.06415e-08	1.66996e-06	up	Ensembl	2775	chr3:89420633-89424043+	exon sense-overlapping	ENSMUST00000125036	Shc1	chr3:89418551-89426546+
chr10	24595301	24595801	diffreps_peak_00010808	5.10649	500	ENSMUST00000125158	Gm15270	2.83929	7.82551e-06	0.000165292	up	Ensembl	870	chr10:24595249-24597108-	natural antisense	ENSMUST00000020171	Ctgf	chr10:24595442-24598678+
chr19	3897481	3897831	diffreps_peak_00070649	5.30542	350	ENSMUST00000134698	Tcirg1	3.45688	4.94976e-06	0.000113792	up	Ensembl	463	chr19:3897071-3897831-	exon sense-overlapping	ENSMUST00000001801	Tcirg1	chr19:3896050-3907133-
chr19	55742881	55743197	diffreps_peak_00074482	7.33197	316	ENSMUST00000133008	Tcf7l2	3.99822	4.65618e-08	2.99209e-06	up	Ensembl	691	chr19:55742845-55910681+	exon sense-overlapping	ENSMUST00000153888	Tcf7l2	chr19:55742468-55932209+
chr11	3352501	3352817	diffreps_peak_00017723	5.51748	316	ENSMUST00000148771	Limk2	4.66667	3.03751e-06	7.74504e-05	up	Ensembl	716	chr11:3350392-3352817-	exon sense-overlapping	ENSMUST00000101640	Limk2	chr11:3344256-3371376-
chr16	58463401	58463823	diffreps_peak_00056860	7.8979	422	ENSMUST00000134324	Dcbld2	4.71358	1.26501e-08	1.1987e-06	up	Ensembl	891	chr16:58456377-58463823+	exon sense-overlapping	ENSMUST00000046663	Dcbld2	chr16:58408443-58469727+
chr2	132260585	132260960	diffreps_peak_00082720	5.86847	375	ENSMUST00000124336	AV099323	9.30233	1.35371e-06	4.03391e-05	up	Ensembl	921	chr2:132253357-132261333+	bidirectional	ENSMUST00000028817	Pcna	chr2:132249162-132253314-
chr19	55742881	55743197	diffreps_peak_00074482	7.33197	316	ENSMUST00000133008	Tcf7l2	3.99822	4.65618e-08	2.99209e-06	up	Ensembl	691	chr19:55742845-55910681+	exon sense-overlapping	NM_001142920	Tcf7l2	chr19:55741810-55933655+
chr4	43518401	43518900	diffreps_peak_00095961	7.13014	499	ENSMUST00000150262	Tpm2	4.65952	7.41063e-08	4.17668e-06	up	Ensembl	1545	chr4:43514711-43523438-	exon sense-overlapping	ENSMUST00000150592	Tpm2	chr4:43519668-43523765-
chr18	65620381	65620700	diffreps_peak_00069071	8.1278	319	ENSMUST00000183157	Zfp532	30.7879	7.45072e-09	8.45988e-07	up	Ensembl	5267	chr18:65619660-65624926+	exon sense-overlapping	ENSMUST00000183326	Zfp532	chr18:65582613-65623282+
chr9	57095247	57095581	diffreps_peak_00148484	7.48182	334	ENSMUST00000165927	Sin3a	2.16236	3.29745e-08	2.33174e-06	up	Ensembl	641	chr9:57095248-57097880+	exon sense-overlapping	ENSMUST00000168502	Sin3a	chr9:57081158-57128366+
chr10	24595301	24595801	diffreps_peak_00010808	5.10649	500	ENSMUST00000125158	Gm15270	2.83929	7.82551e-06	0.000165292	up	Ensembl	870	chr10:24595249-24597108-	natural antisense	ENSMUST00000176228	Ctgf	chr10:24595726-24598683+
chr2	170406101	170406470	diffreps_peak_00085978	5.06076	369	ENSMUST00000133586	Gm14259	4.17704	8.69444e-06	0.000177977	up	Ensembl	1239	chr2:170405181-170407175+	natural antisense	NM_001164369	Bcas1	chr2:170346991-170427845-
chr3	89421161	89421640	diffreps_peak_00090524	7.68526	479	ENSMUST00000153334	Shc1	12.049	2.06415e-08	1.66996e-06	up	Ensembl	2775	chr3:89420633-89424043+	exon sense-overlapping	ENSMUST00000039110	Shc1	chr3:89418443-89430015+
chr7	28370481	28370900	diffreps_peak_00126776	7.81853	419	uc009fyr.1	Plekhg2	3.23336	1.51871e-08	1.33458e-06	up	UCSC_knowngene	1954	chr7:28368679-28372662-	exon sense-overlapping	NM_001290542	Plekhg2	chr7:28359604-28372662-
chr9	85842781	85843340	diffreps_peak_00150348	5.06638	559	uc009qwy.1	AK162386	2.11485	8.58271e-06	0.000176059	up	UCSC_knowngene	2334	chr9:85820241-85844131-	natural antisense	NM_001164792	Tpbg	chr9:85842852-85847055+
chr11	3352501	3352817	diffreps_peak_00017723	5.51748	316	ENSMUST00000148771	Limk2	4.66667	3.03751e-06	7.74504e-05	up	Ensembl	716	chr11:3350392-3352817-	exon sense-overlapping	NM_173053	Limk2	chr11:3343297-3371392-
chr18	65620381	65620700	diffreps_peak_00069071	8.1278	319	ENSMUST00000183157	Zfp532	30.7879	7.45072e-09	8.45988e-07	up	Ensembl	5267	chr18:65619660-65624926+	exon sense-overlapping	ENSMUST00000182979	Zfp532	chr18:65581742-65625334+
chr9	107559261	107559720	diffreps_peak_00151639	8.88394	459	ENSMUST00000129320	Rassf1	100.7	1.30635e-09	2.58155e-07	up	Ensembl	2375	chr9:107557942-107560435+	exon sense-overlapping	NM_019713	Rassf1	chr9:107554583-107562267+
chr11	68270542	68270879	diffreps_peak_00021741	10.6675	337	ENSMUST00000151817	Gm12305	7.35357	2.15037e-11	1.44009e-08	up	Ensembl	407	chr11:68269558-68270879-	intron sense-overlapping	NM_008744	Ntn1	chr11:68209364-68386826-
chr2	132260585	132260960	diffreps_peak_00082720	5.86847	375	ENSMUST00000124336	AV099323	9.30233	1.35371e-06	4.03391e-05	up	Ensembl	921	chr2:132253357-132261333+	bidirectional	NM_011045	Pcna	chr2:132249286-132253180-
chr3	145652061	145652472	diffreps_peak_00093498	7.10927	411	uc012czd.2	FJ422280	2.60785	7.77561e-08	4.31942e-06	up	UCSC_knowngene	1699	chr3:145650312-145652472+	bidirectional	ENSMUST00000029846	Cyr61	chr3:145646971-145649985-
chr7	119827541	119827860	diffreps_peak_00133451	6.41247	319	ENSMUST00000155938	2610020H08Rik	16.1111	3.86839e-07	1.50567e-05	up	Ensembl	796	chr7:119825551-119828010+	exon sense-overlapping	ENSMUST00000084644	2610020H08Rik	chr7:119794130-119848938+
chrM	3844	4925	diffreps_peak_00153226	6.36392	1081	uc009vex.2	AK163440	2.24337	4.32592e-07	1.64166e-05	up	UCSC_knowngene	1081	chrM:3845-4925+	exon sense-overlapping	ENSMUST00000082396	mt-Nd2	chrM:3914-4951+
chr9	107559261	107559720	diffreps_peak_00151639	8.88394	459	ENSMUST00000129320	Rassf1	100.7	1.30635e-09	2.58155e-07	up	Ensembl	2375	chr9:107557942-107560435+	exon sense-overlapping	NM_001243748	Rassf1	chr9:107551555-107562267+
chr6	34685962	34686340	diffreps_peak_00117740	10.0406	378	ENSMUST00000155714	Cald1	4.01758	9.10647e-11	3.71006e-08	up	Ensembl	1422	chr6:34598544-34687173+	exon sense-overlapping	ENSMUST00000115026	Cald1	chr6:34598565-34775466+
chr8	122483041	122483600	diffreps_peak_00143716	8.46242	559	ENSMUST00000123671	Piezo1	3.93229	3.44811e-09	4.98667e-07	up	Ensembl	2860	chr8:122481721-122484780-	natural antisense	ENSMUST00000136253	Ctu2	chr8:122480957-122481744+
chr11	3531181	3531800	diffreps_peak_00017765	9.5213	619	ENSMUST00000123459	Gm11946	3.50107	3.01095e-10	8.89085e-08	up	Ensembl	3941	chr11:3530948-3536856+	natural antisense	ENSMUST00000170588	Smtn	chr11:3517523-3539292-
chr1	131714461	131714780	diffreps_peak_00005889	5.6305	319	uc007cnr.1	5430435G22Rik	65.7	2.34151e-06	6.24954e-05	up	UCSC_knowngene	4104	chr1:131688695-131715439+	exon sense-overlapping	ENSMUST00000064664	5430435G22Rik	chr1:131688707-131712751+
chr1	131714461	131714780	diffreps_peak_00005889	5.6305	319	uc007cnr.1	5430435G22Rik	65.7	2.34151e-06	6.24954e-05	up	UCSC_knowngene	4104	chr1:131688695-131715439+	exon sense-overlapping	ENSMUST00000064679	5430435G22Rik	chr1:131688695-131713542+
chr14	70486561	70486930	diffreps_peak_00044253	5.40173	369	NR_033241	Bmp1	4.32033	3.9652e-06	9.57889e-05	up	RefSeq	4464	chr14:70474555-70520260-	exon sense-overlapping	NM_009755	Bmp1	chr14:70474555-70520260-
chr7	4752161	4752528	diffreps_peak_00124669	8.10185	367	ENSMUST00000182272	Cox6b2	3.42228	7.90947e-09	8.78993e-07	up	Ensembl	519	chr7:4751925-4752528-	exon sense-overlapping	NM_183406	Cox6b2	chr7:4751792-4752902-
chr5	103811062	103811380	diffreps_peak_00110147	7.81076	318	ENSMUST00000152145	Aff1	22.2034	1.54612e-08	1.35345e-06	up	Ensembl	688	chr5:103784359-103811595+	exon sense-overlapping	ENSMUST00000031256	Aff1	chr5:103754573-103855322+
chr3	75878645	75879000	diffreps_peak_00089544	8.43522	355	ENSMUST00000134219	Golim4	3.5282	3.67093e-09	5.21631e-07	up	Ensembl	2062	chr3:75876479-75879008-	exon sense-overlapping	ENSMUST00000167078	Golim4	chr3:75877659-75956937-
chr2	101797420	101797720	diffreps_peak_00080698	9.30069	300	ENSMUST00000140387	Prr5l	156	5.00393e-10	1.27542e-07	up	Ensembl	427	chr2:101772295-101797733-	exon sense-overlapping	ENSMUST00000154525	Prr5l	chr2:101758518-101883014-
chr7	28370481	28370900	diffreps_peak_00126776	7.81853	419	uc009fyr.1	Plekhg2	3.23336	1.51871e-08	1.33458e-06	up	UCSC_knowngene	1954	chr7:28368679-28372662-	exon sense-overlapping	ENSMUST00000119990	Plekhg2	chr7:28359605-28372494-
chr7	143713495	143713800	diffreps_peak_00135566	5.75393	305	ENSMUST00000153864	Osbpl5	2.12812	1.76226e-06	4.97617e-05	up	Ensembl	700	chr7:143713496-143740299-	exon sense-overlapping	ENSMUST00000020411	Osbpl5	chr7:143688762-143741963-
chr8	61708701	61709067	diffreps_peak_00138902	6.6657	366	ENSMUST00000123523	Palld	3.99139	2.15925e-07	9.55079e-06	up	Ensembl	2487	chr8:61707212-61760089-	exon sense-overlapping	ENSMUST00000121785	Palld	chr8:61513246-61902669-
chr19	3897481	3897831	diffreps_peak_00070649	5.30542	350	ENSMUST00000134698	Tcirg1	3.45688	4.94976e-06	0.000113792	up	Ensembl	463	chr19:3897071-3897831-	exon sense-overlapping	ENSMUST00000145791	Tcirg1	chr19:3896050-3905230-
chr11	3531181	3531800	diffreps_peak_00017765	9.5213	619	ENSMUST00000123459	Gm11946	3.50107	3.01095e-10	8.89085e-08	up	Ensembl	3941	chr11:3530948-3536856+	natural antisense	NM_001159284	Smtn	chr11:3517522-3539292-
chr7	127979161	127979620	diffreps_peak_00134449	7.06906	459	uc009jxs.1	AK134717	2.39825	8.52985e-08	4.63659e-06	up	UCSC_knowngene	1514	chr7:127978141-127979654+	intron sense-overlapping	ENSMUST00000121616	Fus	chr7:127967508-127982032+
chr16	91862821	91863200	diffreps_peak_00058143	8.74157	379	ENSMUST00000138117	Itsn1	35.0476	1.81312e-09	3.21973e-07	up	Ensembl	2818	chr16:91862026-91871347+	exon sense-overlapping	ENSMUST00000064797	Itsn1	chr16:91729353-91913988+
chr7	4752161	4752528	diffreps_peak_00124669	8.10185	367	ENSMUST00000182272	Cox6b2	3.42228	7.90947e-09	8.78993e-07	up	Ensembl	519	chr7:4751925-4752528-	exon sense-overlapping	ENSMUST00000182738	Cox6b2	chr7:4751794-4753009-
chr8	25675261	25675742	diffreps_peak_00137502	7.86116	481	uc009lgo.1	Whsc1l1	2.81241	1.37671e-08	1.25328e-06	up	UCSC_knowngene	2577	chr8:25674436-25677972+	exon sense-overlapping	ENSMUST00000155861	Whsc1l1	chr8:25601601-25677214+
chr18	65620381	65620700	diffreps_peak_00069071	8.1278	319	ENSMUST00000183157	Zfp532	30.7879	7.45072e-09	8.45988e-07	up	Ensembl	5267	chr18:65619660-65624926+	exon sense-overlapping	ENSMUST00000182852	Zfp532	chr18:65582938-65688934+
chr4	43518401	43518900	diffreps_peak_00095961	7.13014	499	ENSMUST00000150262	Tpm2	4.65952	7.41063e-08	4.17668e-06	up	Ensembl	1545	chr4:43514711-43523438-	exon sense-overlapping	NM_009416	Tpm2	chr4:43513726-43523554-
chr1	93829756	93830060	diffreps_peak_00004813	5.08411	304	ENSMUST00000141701	D2hgdh	8.136	8.23936e-06	0.000170621	up	Ensembl	689	chr1:93826562-93830308+	exon sense-overlapping	NM_178882	D2hgdh	chr1:93825240-93852174+
chr3	87971077	87971988	diffreps_peak_00090098	7.08942	911	ENSMUST00000159830	Nes	2.61682	8.13919e-08	4.46809e-06	up	Ensembl	1311	chr3:87971078-87973391+	exon sense-overlapping	ENSMUST00000090973	Nes	chr3:87971093-87980451+
chr2	170406101	170406470	diffreps_peak_00085978	5.06076	369	ENSMUST00000133586	Gm14259	4.17704	8.69444e-06	0.000177977	up	Ensembl	1239	chr2:170405181-170407175+	natural antisense	NM_029815	Bcas1	chr2:170346991-170427845-
chr5	103811062	103811380	diffreps_peak_00110147	7.81076	318	ENSMUST00000152145	Aff1	22.2034	1.54612e-08	1.35345e-06	up	Ensembl	688	chr5:103784359-103811595+	exon sense-overlapping	ENSMUST00000153165	Aff1	chr5:103754564-103842253+
chr2	25466710	25467300	diffreps_peak_00076264	7.21817	590	ENSMUST00000144016	Ptgds	4.89385	6.05108e-08	3.59327e-06	up	Ensembl	1327	chr2:25466711-25469383-	exon sense-overlapping	ENSMUST00000114259	Ptgds	chr2:25466709-25469749-
chr4	43631538	43631851	diffreps_peak_00095997	7.20203	313	ENSMUST00000137535	Gm12473	2.17859	6.28019e-08	3.70387e-06	up	Ensembl	579	chr4:43631539-43641533-	natural antisense	ENSMUST00000107874	Npr2	chr4:43632185-43651244+
chr7	127979161	127979620	diffreps_peak_00134449	7.06906	459	uc009jxs.1	AK134717	2.39825	8.52985e-08	4.63659e-06	up	UCSC_knowngene	1514	chr7:127978141-127979654+	exon sense-overlapping	ENSMUST00000106251	Fus	chr7:127967457-127982368+
chr17	79012581	79013080	diffreps_peak_00064821	5.96295	499	ENSMUST00000130070	Prkd3	5.05119	1.08906e-06	3.39435e-05	up	Ensembl	3508	chr17:79010127-79020777-	exon sense-overlapping	NM_001171004	Prkd3	chr17:78949405-79020816-
chr16	42907421	42907721	diffreps_peak_00056322	7.29723	300	ENSMUST00000131689	Zbtb20	3.37936	5.04392e-08	3.16872e-06	up	Ensembl	425	chr16:42907392-43072468+	exon sense-overlapping	NM_001285805	Zbtb20	chr16:42907645-43619123+
chr11	114066141	114066860	diffreps_peak_00027336	9.05594	719	ENSMUST00000144301	Sdk2	2.50133	8.79151e-10	1.94487e-07	up	Ensembl	3083	chr11:113941423-114067029-	exon sense-overlapping	NM_172800	Sdk2	chr11:113780790-114065951-
chr7	127979161	127979620	diffreps_peak_00134449	7.06906	459	uc009jxs.1	AK134717	2.39825	8.52985e-08	4.63659e-06	up	UCSC_knowngene	1514	chr7:127978141-127979654+	exon sense-overlapping	NM_139149	Fus	chr7:127967479-127982031+
chr17	33919870	33920375	diffreps_peak_00061758	6.58592	505	ENSMUST00000172888	Tapbp	2.11323	2.59468e-07	1.11006e-05	up	Ensembl	718	chr17:33919512-33920375+	exon sense-overlapping	ENSMUST00000025161	Tapbp	chr17:33919332-33929288+
chr2	122147716	122148060	diffreps_peak_00082006	7.41181	344	uc008mag.1	BC002288	2.21913	3.87423e-08	2.62805e-06	up	UCSC_knowngene	1644	chr2:122147717-122149360+	exon sense-overlapping	ENSMUST00000102476	B2m	chr2:122147686-122153083+
chr8	25675261	25675742	diffreps_peak_00137502	7.86116	481	uc009lgo.1	Whsc1l1	2.81241	1.37671e-08	1.25328e-06	up	UCSC_knowngene	2577	chr8:25674436-25677972+	exon sense-overlapping	NM_001001735	Whsc1l1	chr8:25602306-25677972+
chr19	55742881	55743197	diffreps_peak_00074482	7.33197	316	ENSMUST00000133008	Tcf7l2	3.99822	4.65618e-08	2.99209e-06	up	Ensembl	691	chr19:55742845-55910681+	exon sense-overlapping	NM_001142918	Tcf7l2	chr19:55741810-55933655+
chr4	43518401	43518900	diffreps_peak_00095961	7.13014	499	ENSMUST00000150262	Tpm2	4.65952	7.41063e-08	4.17668e-06	up	Ensembl	1545	chr4:43514711-43523438-	exon sense-overlapping	NM_001277876	Tpm2	chr4:43513726-43523554-
chr19	55742881	55743197	diffreps_peak_00074482	7.33197	316	ENSMUST00000133008	Tcf7l2	3.99822	4.65618e-08	2.99209e-06	up	Ensembl	691	chr19:55742845-55910681+	exon sense-overlapping	ENSMUST00000111654	Tcf7l2	chr19:55741884-55925239+
chr7	4752161	4752528	diffreps_peak_00124669	8.10185	367	ENSMUST00000182272	Cox6b2	3.42228	7.90947e-09	8.78993e-07	up	Ensembl	519	chr7:4751925-4752528-	exon sense-overlapping	ENSMUST00000182173	Cox6b2	chr7:4751947-4753002-
chr2	101797420	101797720	diffreps_peak_00080698	9.30069	300	ENSMUST00000140387	Prr5l	156	5.00393e-10	1.27542e-07	up	Ensembl	427	chr2:101772295-101797733-	exon sense-overlapping	ENSMUST00000043845	Prr5l	chr2:101716241-101797708-
chr2	181898161	181898600	diffreps_peak_00086998	7.67878	439	ENSMUST00000119395	Gm5466	11.0196	2.09516e-08	1.68772e-06	up	Ensembl	1890	chr2:181896823-181898712+	intergenic	NA	NA	NA
chr18	73863630	73864220	diffreps_peak_00069566	7.53225	590	ENSMUST00000139821	Mro	3.09871	2.93593e-08	2.15723e-06	up	Ensembl	1877	chr18:73863631-73870209+	exon sense-overlapping	ENSMUST00000134847	Mro	chr18:73863672-73871980+
chr19	55742881	55743197	diffreps_peak_00074482	7.33197	316	ENSMUST00000133008	Tcf7l2	3.99822	4.65618e-08	2.99209e-06	up	Ensembl	691	chr19:55742845-55910681+	exon sense-overlapping	ENSMUST00000041717	Tcf7l2	chr19:55741820-55933252+
chr9	57095247	57095581	diffreps_peak_00148484	7.48182	334	ENSMUST00000165927	Sin3a	2.16236	3.29745e-08	2.33174e-06	up	Ensembl	641	chr9:57095248-57097880+	exon sense-overlapping	ENSMUST00000168177	Sin3a	chr9:57076399-57128366+
chr1	189833301	189833640	diffreps_peak_00009507	6.08476	339	ENSMUST00000181876	Gm26574	3.11641	8.22704e-07	2.70183e-05	up	Ensembl	2141	chr1:189833141-189836620-	natural antisense	NM_008976	Ptpn14	chr1:189728268-189876693+
chr14	69744481	69744840	diffreps_peak_00044156	8.27413	359	NR_130166	4930480K23Rik	87.5	5.31945e-09	6.63885e-07	up	RefSeq	3326	chr14:69732784-69745869+	bidirectional	NM_134078	Chmp7	chr14:69716979-69732570-
chr17	6921421	6921739	diffreps_peak_00059074	5.08452	318	uc008ahz.1	Rsph3b	4.59443	8.23145e-06	0.000170526	up	UCSC_knowngene	1338	chr17:6920869-6948356-	exon sense-overlapping	NM_001083945	Rsph3b	chr17:6904716-6948356-
chr5	24429141	24429578	diffreps_peak_00106035	9.39705	437	ENSMUST00000155636	Slc4a2	2.15299	4.00818e-10	1.09708e-07	up	Ensembl	637	chr5:24429018-24429779+	exon sense-overlapping	NM_001253892	Slc4a2	chr5:24427521-24440947+
chr18	65620381	65620700	diffreps_peak_00069071	8.1278	319	ENSMUST00000183157	Zfp532	30.7879	7.45072e-09	8.45988e-07	up	Ensembl	5267	chr18:65619660-65624926+	exon sense-overlapping	ENSMUST00000183319	Zfp532	chr18:65582294-65623083+
chr7	127979161	127979620	diffreps_peak_00134449	7.06906	459	uc009jxs.1	AK134717	2.39825	8.52985e-08	4.63659e-06	up	UCSC_knowngene	1514	chr7:127978141-127979654+	exon sense-overlapping	ENSMUST00000174632	Fus	chr7:127977314-127981449+
chr9	57095247	57095581	diffreps_peak_00148484	7.48182	334	ENSMUST00000165927	Sin3a	2.16236	3.29745e-08	2.33174e-06	up	Ensembl	641	chr9:57095248-57097880+	exon sense-overlapping	ENSMUST00000163400	Sin3a	chr9:57076628-57095403+
chr5	103811062	103811380	diffreps_peak_00110147	7.81076	318	ENSMUST00000152145	Aff1	22.2034	1.54612e-08	1.35345e-06	up	Ensembl	688	chr5:103784359-103811595+	exon sense-overlapping	ENSMUST00000054979	Aff1	chr5:103754162-103855322+
chr7	4752161	4752528	diffreps_peak_00124669	8.10185	367	ENSMUST00000182272	Cox6b2	3.42228	7.90947e-09	8.78993e-07	up	Ensembl	519	chr7:4751925-4752528-	exon sense-overlapping	NM_001289849	Cox6b2	chr7:4751792-4753094-
chr18	5592801	5593320	diffreps_peak_00065773	9.73712	519	ENSMUST00000161096	Gm10125	7.31611	1.8318e-10	6.11937e-08	up	Ensembl	3491	chr18:5565652-5593505-	intronic antisense	NM_011546	Zeb1	chr18:5591860-5775468+
chr6	72629955	72630270	diffreps_peak_00119553	6.52115	315	ENSMUST00000141743	Tcf7l1	2.68281	3.01199e-07	1.24276e-05	up	Ensembl	518	chr6:72627591-72630270-	natural antisense	ENSMUST00000156497	Gm15401	chr6:72629288-72636483+
chr8	122483041	122483600	diffreps_peak_00143716	8.46242	559	ENSMUST00000123671	Piezo1	3.93229	3.44811e-09	4.98667e-07	up	Ensembl	2860	chr8:122481721-122484780-	natural antisense	ENSMUST00000116412	Ctu2	chr8:122476143-122483092+
chr7	28370481	28370900	diffreps_peak_00126776	7.81853	419	uc009fyr.1	Plekhg2	3.23336	1.51871e-08	1.33458e-06	up	UCSC_knowngene	1954	chr7:28368679-28372662-	exon sense-overlapping	ENSMUST00000147887	Plekhg2	chr7:28370416-28371508-
chr7	24919221	24919640	diffreps_peak_00126020	6.80687	419	ENSMUST00000129928	Arhgef1	2.20107	1.56003e-07	7.40027e-06	up	Ensembl	777	chr7:24919202-24922379+	exon sense-overlapping	NM_001130150	Arhgef1	chr7:24902986-24926591+
chr11	3531181	3531800	diffreps_peak_00017765	9.5213	619	ENSMUST00000123459	Gm11946	3.50107	3.01095e-10	8.89085e-08	up	Ensembl	3941	chr11:3530948-3536856+	natural antisense	NM_001284428	Smtn	chr11:3517522-3539292-
chr7	24919221	24919640	diffreps_peak_00126020	6.80687	419	ENSMUST00000129928	Arhgef1	2.20107	1.56003e-07	7.40027e-06	up	Ensembl	777	chr7:24919202-24922379+	exon sense-overlapping	NM_008488	Arhgef1	chr7:24902986-24926591+
chr16	58463401	58463823	diffreps_peak_00056860	7.8979	422	ENSMUST00000134324	Dcbld2	4.71358	1.26501e-08	1.1987e-06	up	Ensembl	891	chr16:58456377-58463823+	exon sense-overlapping	NM_028523	Dcbld2	chr16:58408535-58469745+
chr7	4752161	4752528	diffreps_peak_00124669	8.10185	367	ENSMUST00000182272	Cox6b2	3.42228	7.90947e-09	8.78993e-07	up	Ensembl	519	chr7:4751925-4752528-	exon sense-overlapping	ENSMUST00000182111	Cox6b2	chr7:4751792-4753023-
chr5	24429141	24429578	diffreps_peak_00106035	9.39705	437	ENSMUST00000155636	Slc4a2	2.15299	4.00818e-10	1.09708e-07	up	Ensembl	637	chr5:24429018-24429779+	exon sense-overlapping	ENSMUST00000080067	Slc4a2	chr5:24425232-24440950+
chr7	45381881	45382240	diffreps_peak_00128351	5.07507	359	NR_126538	Snrnp70	2.19764	8.41263e-06	0.000173289	up	RefSeq	3111	chr7:45376454-45395742-	exon sense-overlapping	NM_009224	Snrnp70	chr7:45376454-45395742-
chr7	119827541	119827860	diffreps_peak_00133451	6.41247	319	ENSMUST00000155938	2610020H08Rik	16.1111	3.86839e-07	1.50567e-05	up	Ensembl	796	chr7:119825551-119828010+	exon sense-overlapping	NM_001004187	2610020H08Rik	chr7:119794187-119848941+
chr7	143713495	143713800	diffreps_peak_00135566	5.75393	305	ENSMUST00000153864	Osbpl5	2.12812	1.76226e-06	4.97617e-05	up	Ensembl	700	chr7:143713496-143740299-	exon sense-overlapping	NM_024289	Osbpl5	chr7:143688762-143741963-
chr6	114920821	114921260	diffreps_peak_00122079	8.25585	439	uc009dii.1	AK078466	6.0712	5.54823e-09	6.83693e-07	up	UCSC_knowngene	1763	chr6:114920054-114921816-	intron sense-overlapping	ENSMUST00000147639	Vgll4	chr6:114862321-114969180-
chr1	189833301	189833640	diffreps_peak_00009507	6.08476	339	ENSMUST00000181876	Gm26574	3.11641	8.22704e-07	2.70183e-05	up	Ensembl	2141	chr1:189833141-189836620-	natural antisense	ENSMUST00000097442	Ptpn14	chr1:189728268-189876689+
chr19	55742881	55743197	diffreps_peak_00074482	7.33197	316	ENSMUST00000133008	Tcf7l2	3.99822	4.65618e-08	2.99209e-06	up	Ensembl	691	chr19:55742845-55910681+	exon sense-overlapping	ENSMUST00000127233	Tcf7l2	chr19:55742364-55933231+
chr7	4752161	4752528	diffreps_peak_00124669	8.10185	367	ENSMUST00000182272	Cox6b2	3.42228	7.90947e-09	8.78993e-07	up	Ensembl	519	chr7:4751925-4752528-	exon sense-overlapping	ENSMUST00000183971	Cox6b2	chr7:4751792-4752972-
chr17	79012581	79013080	diffreps_peak_00064821	5.96295	499	ENSMUST00000130070	Prkd3	5.05119	1.08906e-06	3.39435e-05	up	Ensembl	3508	chr17:79010127-79020777-	exon sense-overlapping	ENSMUST00000119284	Prkd3	chr17:78950549-79020816-
chr5	24429141	24429578	diffreps_peak_00106035	9.39705	437	ENSMUST00000155636	Slc4a2	2.15299	4.00818e-10	1.09708e-07	up	Ensembl	637	chr5:24429018-24429779+	exon sense-overlapping	ENSMUST00000115047	Slc4a2	chr5:24428423-24440947+
chr19	6350908	6351238	diffreps_peak_00071269	6.84979	330	ENSMUST00000140098	Map4k2	3.55414	1.41321e-07	6.86755e-06	up	Ensembl	518	chr19:6350909-6351580+	exon sense-overlapping	NM_001291787	Map4k2	chr19:6341160-6355619+
chr12	3805801	3806160	diffreps_peak_00029000	7.85805	359	uc007mwz.1	BC048080	14.5588	1.38661e-08	1.25787e-06	up	UCSC_knowngene	2910	chr12:3803312-3806221-	bidirectional	ENSMUST00000172509	Dnmt3a	chr12:3807058-3896995+
chr14	69744481	69744840	diffreps_peak_00044156	8.27413	359	NR_130166	4930480K23Rik	87.5	5.31945e-09	6.63885e-07	up	RefSeq	3326	chr14:69732784-69745869+	bidirectional	uc007ums.2	Chmp7	chr14:69716979-69732570-
chr5	137633848	137634180	diffreps_peak_00114820	5.49809	332	ENSMUST00000176988	Lrch4	3.866	3.17622e-06	8.02481e-05	up	Ensembl	891	chr5:137629143-137636799+	exon sense-overlapping	ENSMUST00000176667	Lrch4	chr5:137629178-137641099+
chr6	34685962	34686340	diffreps_peak_00117740	10.0406	378	ENSMUST00000155714	Cald1	4.01758	9.10647e-11	3.71006e-08	up	Ensembl	1422	chr6:34598544-34687173+	exon sense-overlapping	ENSMUST00000079391	Cald1	chr6:34598500-34775454+
chr7	24917894	24918280	diffreps_peak_00126016	8.55744	386	ENSMUST00000144714	Arhgef1	4.20194	2.77051e-09	4.29464e-07	up	Ensembl	1087	chr7:24912617-24918392+	exon sense-overlapping	ENSMUST00000117419	Arhgef1	chr7:24904407-24926592+
chr17	28999801	29000120	diffreps_peak_00061031	7.39095	319	ENSMUST00000145298	Stk38	2.85125	4.06491e-08	2.72047e-06	up	Ensembl	2767	chr17:28997564-29007896-	exon sense-overlapping	ENSMUST00000009138	Stk38	chr17:28970885-29007937-
chr7	24919221	24919640	diffreps_peak_00126020	6.80687	419	ENSMUST00000129928	Arhgef1	2.20107	1.56003e-07	7.40027e-06	up	Ensembl	777	chr7:24919202-24922379+	exon sense-overlapping	ENSMUST00000117419	Arhgef1	chr7:24904407-24926592+
chr7	143713495	143713800	diffreps_peak_00135566	5.75393	305	ENSMUST00000153864	Osbpl5	2.12812	1.76226e-06	4.97617e-05	up	Ensembl	700	chr7:143713496-143740299-	exon sense-overlapping	ENSMUST00000134056	Osbpl5	chr7:143709051-143756985-
chr4	43631538	43631851	diffreps_peak_00095997	7.20203	313	ENSMUST00000137535	Gm12473	2.17859	6.28019e-08	3.70387e-06	up	Ensembl	579	chr4:43631539-43641533-	natural antisense	ENSMUST00000030191	Npr2	chr4:43631935-43651244+
chr6	86526481	86526980	diffreps_peak_00120344	5.23067	499	uc009csd.1	1600020E01Rik	2.2304	5.87934e-06	0.00013054	up	UCSC_knowngene	2099	chr6:86526271-86564449+	bidirectional	uc009csc.1	Pcbp1	chr6:86524497-86526165-
chr11	32213821	32214304	diffreps_peak_00019219	5.09154	483	ENSMUST00000143036	Rhbdf1	2.19395	8.09954e-06	0.000168458	up	Ensembl	5089	chr11:32209586-32217317-	exon sense-overlapping	ENSMUST00000144902	Rhbdf1	chr11:32216009-32222259-
chr12	3805801	3806160	diffreps_peak_00029000	7.85805	359	uc007mwz.1	BC048080	14.5588	1.38661e-08	1.25787e-06	up	UCSC_knowngene	2910	chr12:3803312-3806221-	bidirectional	ENSMUST00000174817	Dnmt3a	chr12:3807160-3913491+
chr2	122147716	122148060	diffreps_peak_00082006	7.41181	344	uc008mag.1	BC002288	2.21913	3.87423e-08	2.62805e-06	up	UCSC_knowngene	1644	chr2:122147717-122149360+	exon sense-overlapping	NM_009735	B2m	chr2:122147687-122153082+
chr2	122147716	122148060	diffreps_peak_00082006	7.41181	344	uc008mag.1	BC002288	2.21913	3.87423e-08	2.62805e-06	up	UCSC_knowngene	1644	chr2:122147717-122149360+	intronic antisense	ENSMUST00000028665	Patl2	chr2:122120108-122186189-
chr3	87971077	87971988	diffreps_peak_00090098	7.08942	911	ENSMUST00000159830	Nes	2.61682	8.13919e-08	4.46809e-06	up	Ensembl	1311	chr3:87971078-87973391+	exon sense-overlapping	NM_016701	Nes	chr3:87971093-87980451+
chr9	107559261	107559720	diffreps_peak_00151639	8.88394	459	ENSMUST00000129320	Rassf1	100.7	1.30635e-09	2.58155e-07	up	Ensembl	2375	chr9:107557942-107560435+	exon sense-overlapping	ENSMUST00000010211	Rassf1	chr9:107554656-107562263+
chr18	23774341	23774660	diffreps_peak_00066410	5.76852	319	ENSMUST00000132286	Mapre2	14.3036	1.70406e-06	4.8427e-05	up	Ensembl	2169	chr18:23752333-23774684+	exon sense-overlapping	ENSMUST00000118826	Mapre2	chr18:23752393-23860637+
chr9	78821121	78821500	diffreps_peak_00150191	6.44933	379	ENSMUST00000074819	Gm8116	2.72921	3.55358e-07	1.40611e-05	up	Ensembl	1470	chr9:78820423-78821892-	intergenic	NA	NA	NA
chr17	34601781	34602180	diffreps_peak_00061880	7.06118	399	ENSMUST00000174045	Rnf5	2.12772	8.686e-08	4.70276e-06	up	Ensembl	763	chr17:34601782-34603661-	exon sense-overlapping	NM_019403	Rnf5	chr17:34601099-34603561-
chr18	65620381	65620700	diffreps_peak_00069071	8.1278	319	ENSMUST00000183157	Zfp532	30.7879	7.45072e-09	8.45988e-07	up	Ensembl	5267	chr18:65619660-65624926+	exon sense-overlapping	NM_207255	Zfp532	chr18:65580230-65689436+
chr7	28370481	28370900	diffreps_peak_00126776	7.81853	419	uc009fyr.1	Plekhg2	3.23336	1.51871e-08	1.33458e-06	up	UCSC_knowngene	1954	chr7:28368679-28372662-	exon sense-overlapping	NM_001083912	Plekhg2	chr7:28359604-28372662-
chr3	75878645	75879000	diffreps_peak_00089544	8.43522	355	ENSMUST00000134219	Golim4	3.5282	3.67093e-09	5.21631e-07	up	Ensembl	2062	chr3:75876479-75879008-	exon sense-overlapping	ENSMUST00000038563	Golim4	chr3:75876383-75956929-
chr8	61708701	61709067	diffreps_peak_00138902	6.6657	366	ENSMUST00000123523	Palld	3.99139	2.15925e-07	9.55079e-06	up	Ensembl	2487	chr8:61707212-61760089-	exon sense-overlapping	NM_001293773	Palld	chr8:61511429-61760098-
chr1	93829756	93830060	diffreps_peak_00004813	5.08411	304	ENSMUST00000141701	D2hgdh	8.136	8.23936e-06	0.000170621	up	Ensembl	689	chr1:93826562-93830308+	exon sense-overlapping	ENSMUST00000112881	D2hgdh	chr1:93825274-93852348+
chr19	55742881	55743197	diffreps_peak_00074482	7.33197	316	ENSMUST00000133008	Tcf7l2	3.99822	4.65618e-08	2.99209e-06	up	Ensembl	691	chr19:55742845-55910681+	exon sense-overlapping	ENSMUST00000111652	Tcf7l2	chr19:55742242-55912723+
chr19	55742881	55743197	diffreps_peak_00074482	7.33197	316	ENSMUST00000133008	Tcf7l2	3.99822	4.65618e-08	2.99209e-06	up	Ensembl	691	chr19:55742845-55910681+	exon sense-overlapping	NM_001142919	Tcf7l2	chr19:55741810-55933655+
chr18	23774341	23774660	diffreps_peak_00066410	5.76852	319	ENSMUST00000132286	Mapre2	14.3036	1.70406e-06	4.8427e-05	up	Ensembl	2169	chr18:23752333-23774684+	exon sense-overlapping	NM_001162942	Mapre2	chr18:23752333-23893861+
chr2	101797420	101797720	diffreps_peak_00080698	9.30069	300	ENSMUST00000140387	Prr5l	156	5.00393e-10	1.27542e-07	up	Ensembl	427	chr2:101772295-101797733-	exon sense-overlapping	ENSMUST00000144549	Prr5l	chr2:101772184-101814333-
chr5	103811062	103811380	diffreps_peak_00110147	7.81076	318	ENSMUST00000152145	Aff1	22.2034	1.54612e-08	1.35345e-06	up	Ensembl	688	chr5:103784359-103811595+	exon sense-overlapping	NM_001080798	Aff1	chr5:103754573-103855322+
chr7	28370481	28370900	diffreps_peak_00126776	7.81853	419	uc009fyr.1	Plekhg2	3.23336	1.51871e-08	1.33458e-06	up	UCSC_knowngene	1954	chr7:28368679-28372662-	exon sense-overlapping	ENSMUST00000094644	Plekhg2	chr7:28359604-28372233-
chr7	4752161	4752528	diffreps_peak_00124669	8.10185	367	ENSMUST00000182272	Cox6b2	3.42228	7.90947e-09	8.78993e-07	up	Ensembl	519	chr7:4751925-4752528-	exon sense-overlapping	NM_183405	Cox6b2	chr7:4751792-4753094-
chr7	28370481	28370900	diffreps_peak_00126776	7.81853	419	uc009fyr.1	Plekhg2	3.23336	1.51871e-08	1.33458e-06	up	UCSC_knowngene	1954	chr7:28368679-28372662-	exon sense-overlapping	NM_138752	Plekhg2	chr7:28359604-28372662-
chr18	5592801	5593320	diffreps_peak_00065773	9.73712	519	ENSMUST00000161096	Gm10125	7.31611	1.8318e-10	6.11937e-08	up	Ensembl	3491	chr18:5565652-5593505-	intronic antisense	ENSMUST00000025081	Zeb1	chr18:5591860-5775467+
chr2	101797420	101797720	diffreps_peak_00080698	9.30069	300	ENSMUST00000140387	Prr5l	156	5.00393e-10	1.27542e-07	up	Ensembl	427	chr2:101772295-101797733-	exon sense-overlapping	ENSMUST00000125985	Prr5l	chr2:101741348-101838980-
chr8	25675261	25675742	diffreps_peak_00137502	7.86116	481	uc009lgo.1	Whsc1l1	2.81241	1.37671e-08	1.25328e-06	up	UCSC_knowngene	2577	chr8:25674436-25677972+	exon sense-overlapping	ENSMUST00000139966	Whsc1l1	chr8:25602284-25714970+
chr5	115544113	115544569	diffreps_peak_00111662	10.1739	456	ENSMUST00000134198	Pxn	2.3463	6.70044e-11	3.04973e-08	up	Ensembl	524	chr5:115544114-115544948+	exon sense-overlapping	ENSMUST00000067268	Pxn	chr5:115506676-115555987+
chr11	114066141	114066860	diffreps_peak_00027336	9.05594	719	ENSMUST00000144301	Sdk2	2.50133	8.79151e-10	1.94487e-07	up	Ensembl	3083	chr11:113941423-114067029-	exon sense-overlapping	ENSMUST00000041627	Sdk2	chr11:113776374-114066218-
chr19	55742881	55743197	diffreps_peak_00074482	7.33197	316	ENSMUST00000133008	Tcf7l2	3.99822	4.65618e-08	2.99209e-06	up	Ensembl	691	chr19:55742845-55910681+	exon sense-overlapping	NM_001142921	Tcf7l2	chr19:55741810-55933655+
chr7	45924497	45924820	diffreps_peak_00128577	10.7634	323	ENSMUST00000146062	Ccdc114	11.9065	1.72412e-11	1.26899e-08	up	Ensembl	741	chr7:45924216-45925067+	exon sense-overlapping	ENSMUST00000133500	Ccdc114	chr7:45924243-45936669+
chr19	55742881	55743197	diffreps_peak_00074482	7.33197	316	ENSMUST00000133008	Tcf7l2	3.99822	4.65618e-08	2.99209e-06	up	Ensembl	691	chr19:55742845-55910681+	exon sense-overlapping	ENSMUST00000111662	Tcf7l2	chr19:55741820-55933229+
chr7	29791021	29791580	diffreps_peak_00127093	8.35486	559	ENSMUST00000126504	Zfp30	22.8228	4.4171e-09	5.9085e-07	up	Ensembl	3707	chr7:29784023-29791912+	exon sense-overlapping	NM_013705	Zfp30	chr7:29784790-29794540+
chr17	79012581	79013080	diffreps_peak_00064821	5.96295	499	ENSMUST00000130070	Prkd3	5.05119	1.08906e-06	3.39435e-05	up	Ensembl	3508	chr17:79010127-79020777-	exon sense-overlapping	ENSMUST00000003191	Prkd3	chr17:78949405-79013306-
chr16	91862821	91863200	diffreps_peak_00058143	8.74157	379	ENSMUST00000138117	Itsn1	35.0476	1.81312e-09	3.21973e-07	up	Ensembl	2818	chr16:91862026-91871347+	exon sense-overlapping	ENSMUST00000113996	Itsn1	chr16:91729373-91871653+
chr8	25675261	25675742	diffreps_peak_00137502	7.86116	481	uc009lgo.1	Whsc1l1	2.81241	1.37671e-08	1.25328e-06	up	UCSC_knowngene	2577	chr8:25674436-25677972+	exon sense-overlapping	ENSMUST00000084026	Whsc1l1	chr8:25640284-25719667+
chr7	24917894	24918280	diffreps_peak_00126016	8.55744	386	ENSMUST00000144714	Arhgef1	4.20194	2.77051e-09	4.29464e-07	up	Ensembl	1087	chr7:24912617-24918392+	exon sense-overlapping	NM_001130153	Arhgef1	chr7:24902986-24926591+
chr15	77765421	77765828	diffreps_peak_00049482	8.30414	407	ENSMUST00000139729	Myh9	2.43183	4.9643e-09	6.3117e-07	up	Ensembl	723	chr15:77765328-77767190-	exon sense-overlapping	ENSMUST00000016771	Myh9	chr15:77760587-77842175-
chr3	89421161	89421640	diffreps_peak_00090524	7.68526	479	ENSMUST00000153334	Shc1	12.049	2.06415e-08	1.66996e-06	up	Ensembl	2775	chr3:89420633-89424043+	exon sense-overlapping	ENSMUST00000128238	Shc1	chr3:89418594-89426702+
chr19	6350908	6351238	diffreps_peak_00071269	6.84979	330	ENSMUST00000140098	Map4k2	3.55414	1.41321e-07	6.86755e-06	up	Ensembl	518	chr19:6350909-6351580+	exon sense-overlapping	NM_009006	Map4k2	chr19:6341160-6355619+
chr8	122483041	122483600	diffreps_peak_00143716	8.46242	559	ENSMUST00000123671	Piezo1	3.93229	3.44811e-09	4.98667e-07	up	Ensembl	2860	chr8:122481721-122484780-	natural antisense	NM_153775	Ctu2	chr8:122476143-122483092+
chr8	72138301	72138737	diffreps_peak_00139811	6.85536	436	ENSMUST00000181918	Gm26586	2.24422	1.39521e-07	6.80752e-06	up	Ensembl	1745	chr8:72137389-72140820-	natural antisense	ENSMUST00000003575	Tpm4	chr8:72135259-72153142+
chr2	170406101	170406470	diffreps_peak_00085978	5.06076	369	ENSMUST00000133586	Gm14259	4.17704	8.69444e-06	0.000177977	up	Ensembl	1239	chr2:170405181-170407175+	natural antisense	ENSMUST00000154650	Bcas1	chr2:170346991-170406509-
chr11	32213821	32214304	diffreps_peak_00019219	5.09154	483	ENSMUST00000143036	Rhbdf1	2.19395	8.09954e-06	0.000168458	up	Ensembl	5089	chr11:32209586-32217317-	exon sense-overlapping	ENSMUST00000143988	Rhbdf1	chr11:32209804-32211139-
chr2	101797420	101797720	diffreps_peak_00080698	9.30069	300	ENSMUST00000140387	Prr5l	156	5.00393e-10	1.27542e-07	up	Ensembl	427	chr2:101772295-101797733-	exon sense-overlapping	ENSMUST00000163762	Prr5l	chr2:101714285-101838980-
chr3	87971077	87971988	diffreps_peak_00090098	7.08942	911	ENSMUST00000159830	Nes	2.61682	8.13919e-08	4.46809e-06	up	Ensembl	1311	chr3:87971078-87973391+	exon sense-overlapping	ENSMUST00000160694	Nes	chr3:87971129-87980451+
chr8	122483041	122483600	diffreps_peak_00143716	8.46242	559	ENSMUST00000123671	Piezo1	3.93229	3.44811e-09	4.98667e-07	up	Ensembl	2860	chr8:122481721-122484780-	exon sense-overlapping	ENSMUST00000067252	Piezo1	chr8:122481698-122551329-
chr5	115544113	115544569	diffreps_peak_00111662	10.1739	456	ENSMUST00000134198	Pxn	2.3463	6.70044e-11	3.04973e-08	up	Ensembl	524	chr5:115544114-115544948+	exon sense-overlapping	NM_011223	Pxn	chr5:115506676-115555987+
chr6	114920821	114921260	diffreps_peak_00122079	8.25585	439	uc009dii.1	AK078466	6.0712	5.54823e-09	6.83693e-07	up	UCSC_knowngene	1763	chr6:114920054-114921816-	exon sense-overlapping	NM_177683	Vgll4	chr6:114862092-114921752-
chr2	101797420	101797720	diffreps_peak_00080698	9.30069	300	ENSMUST00000140387	Prr5l	156	5.00393e-10	1.27542e-07	up	Ensembl	427	chr2:101772295-101797733-	exon sense-overlapping	ENSMUST00000124802	Prr5l	chr2:101772140-101798054-
chr6	114920821	114921260	diffreps_peak_00122079	8.25585	439	uc009dii.1	AK078466	6.0712	5.54823e-09	6.83693e-07	up	UCSC_knowngene	1763	chr6:114920054-114921816-	exon sense-overlapping	ENSMUST00000032459	Vgll4	chr6:114861424-114921821-
chr11	32213261	32213600	diffreps_peak_00019218	5.13475	339	ENSMUST00000143036	Rhbdf1	2.59475	7.33252e-06	0.000156557	up	Ensembl	5089	chr11:32209586-32217317-	exon sense-overlapping	NM_010117	Rhbdf1	chr11:32209585-32222293-
chr19	3897481	3897831	diffreps_peak_00070649	5.30542	350	ENSMUST00000134698	Tcirg1	3.45688	4.94976e-06	0.000113792	up	Ensembl	463	chr19:3897071-3897831-	exon sense-overlapping	NM_001136091	Tcirg1	chr19:3896050-3907133-
chr18	65620381	65620700	diffreps_peak_00069071	8.1278	319	ENSMUST00000183157	Zfp532	30.7879	7.45072e-09	8.45988e-07	up	Ensembl	5267	chr18:65619660-65624926+	exon sense-overlapping	ENSMUST00000182655	Zfp532	chr18:65583415-65623248+
chr1	131714461	131714780	diffreps_peak_00005889	5.6305	319	uc007cnr.1	5430435G22Rik	65.7	2.34151e-06	6.24954e-05	up	UCSC_knowngene	4104	chr1:131688695-131715439+	exon sense-overlapping	NM_145509	5430435G22Rik	chr1:131688695-131713464+
chr19	55742881	55743197	diffreps_peak_00074482	7.33197	316	ENSMUST00000133008	Tcf7l2	3.99822	4.65618e-08	2.99209e-06	up	Ensembl	691	chr19:55742845-55910681+	exon sense-overlapping	ENSMUST00000111653	Tcf7l2	chr19:55742269-55925236+
chr15	79154908	79155300	diffreps_peak_00049787	7.22364	392	uc029stk.1	Sox10	3.11694	5.97529e-08	3.56788e-06	up	UCSC_knowngene	397	chr15:79154909-79155305-	exon sense-overlapping	ENSMUST00000040019	Sox10	chr15:79154913-79164490-
chr19	55742881	55743197	diffreps_peak_00074482	7.33197	316	ENSMUST00000133008	Tcf7l2	3.99822	4.65618e-08	2.99209e-06	up	Ensembl	691	chr19:55742845-55910681+	exon sense-overlapping	ENSMUST00000148666	Tcf7l2	chr19:55898553-55919604+
chr8	25675261	25675742	diffreps_peak_00137502	7.86116	481	uc009lgo.1	Whsc1l1	2.81241	1.37671e-08	1.25328e-06	up	UCSC_knowngene	2577	chr8:25674436-25677972+	exon sense-overlapping	NM_001081269	Whsc1l1	chr8:25640284-25719667+
chr8	61708701	61709067	diffreps_peak_00138902	6.6657	366	ENSMUST00000123523	Palld	3.99139	2.15925e-07	9.55079e-06	up	Ensembl	2487	chr8:61707212-61760089-	exon sense-overlapping	NM_001293772	Palld	chr8:61511429-61902694-
chr12	3805801	3806160	diffreps_peak_00029000	7.85805	359	uc007mwz.1	BC048080	14.5588	1.38661e-08	1.25787e-06	up	UCSC_knowngene	2910	chr12:3803312-3806221-	bidirectional	NM_007872	Dnmt3a	chr12:3806980-3914443+
chr12	80112682	80113000	diffreps_peak_00032147	10.1178	318	ENSMUST00000181323	Gm26669	2.80167	7.62398e-11	3.26437e-08	up	Ensembl	1808	chr12:80108034-80113000+	natural antisense	NM_007564	Zfp36l1	chr12:80107760-80113013-
chr10	24595301	24595801	diffreps_peak_00010808	5.10649	500	ENSMUST00000125158	Gm15270	2.83929	7.82551e-06	0.000165292	up	Ensembl	870	chr10:24595249-24597108-	natural antisense	ENSMUST00000129142	Ctgf	chr10:24595780-24596370+
chr18	65620381	65620700	diffreps_peak_00069071	8.1278	319	ENSMUST00000183157	Zfp532	30.7879	7.45072e-09	8.45988e-07	up	Ensembl	5267	chr18:65619660-65624926+	exon sense-overlapping	ENSMUST00000049016	Zfp532	chr18:65580230-65689443+
chrM	12405	14140	diffreps_peak_00153234	5.38111	1735	uc009vfc.1	Cytb	2.00844	4.15806e-06	9.9649e-05	up	UCSC_knowngene	2883	chrM:12406-15288+	exon sense-overlapping	ENSMUST00000082421	mt-Cytb	chrM:14145-15288+
chr14	69744481	69744840	diffreps_peak_00044156	8.27413	359	NR_130166	4930480K23Rik	87.5	5.31945e-09	6.63885e-07	up	RefSeq	3326	chr14:69732784-69745869+	bidirectional	ENSMUST00000036381	Chmp7	chr14:69716979-69732570-
chr19	55742881	55743197	diffreps_peak_00074482	7.33197	316	ENSMUST00000133008	Tcf7l2	3.99822	4.65618e-08	2.99209e-06	up	Ensembl	691	chr19:55742845-55910681+	exon sense-overlapping	ENSMUST00000111649	Tcf7l2	chr19:55742243-55912722+
chr19	55742881	55743197	diffreps_peak_00074482	7.33197	316	ENSMUST00000133008	Tcf7l2	3.99822	4.65618e-08	2.99209e-06	up	Ensembl	691	chr19:55742845-55910681+	exon sense-overlapping	ENSMUST00000111651	Tcf7l2	chr19:55742243-55912723+
chr16	91862821	91863200	diffreps_peak_00058143	8.74157	379	ENSMUST00000138117	Itsn1	35.0476	1.81312e-09	3.21973e-07	up	Ensembl	2818	chr16:91862026-91871347+	exon sense-overlapping	ENSMUST00000114001	Itsn1	chr16:91729281-91870210+
chr11	68270542	68270879	diffreps_peak_00021741	10.6675	337	ENSMUST00000151817	Gm12305	7.35357	2.15037e-11	1.44009e-08	up	Ensembl	407	chr11:68269558-68270879-	intron sense-overlapping	ENSMUST00000108674	Ntn1	chr11:68209364-68400823-
chr5	110386581	110387260	diffreps_peak_00110662	5.57965	679	ENSMUST00000180866	Gm26711	2.65366	2.6324e-06	6.87023e-05	up	Ensembl	1833	chr5:110385835-110388073+	intronic antisense	NM_001142642	Fbrsl1	chr5:110361752-110448503-
chr7	28370481	28370900	diffreps_peak_00126776	7.81853	419	uc009fyr.1	Plekhg2	3.23336	1.51871e-08	1.33458e-06	up	UCSC_knowngene	1954	chr7:28368679-28372662-	exon sense-overlapping	ENSMUST00000144700	Plekhg2	chr7:28361092-28372599-
chr19	3897481	3897831	diffreps_peak_00070649	5.30542	350	ENSMUST00000134698	Tcirg1	3.45688	4.94976e-06	0.000113792	up	Ensembl	463	chr19:3897071-3897831-	exon sense-overlapping	NM_001167784	Tcirg1	chr19:3896050-3906983-
chr16	42907421	42907721	diffreps_peak_00056322	7.29723	300	ENSMUST00000131689	Zbtb20	3.37936	5.04392e-08	3.16872e-06	up	Ensembl	425	chr16:42907392-43072468+	exon sense-overlapping	ENSMUST00000114694	Zbtb20	chr16:42907652-43642602+
chr19	6350908	6351238	diffreps_peak_00071269	6.84979	330	ENSMUST00000140098	Map4k2	3.55414	1.41321e-07	6.86755e-06	up	Ensembl	518	chr19:6350909-6351580+	exon sense-overlapping	ENSMUST00000025897	Map4k2	chr19:6341160-6355615+
chr8	90816641	90816984	diffreps_peak_00141310	5.40804	343	uc009msd.1	AK077163	2.82704	3.90801e-06	9.46081e-05	up	UCSC_knowngene	940	chr8:90816145-90817354-	intergenic	NA	NA	NA
chr17	33919870	33920375	diffreps_peak_00061758	6.58592	505	ENSMUST00000172888	Tapbp	2.11323	2.59468e-07	1.11006e-05	up	Ensembl	718	chr17:33919512-33920375+	exon sense-overlapping	ENSMUST00000172619	Tapbp	chr17:33915899-33920415+
chr8	72138301	72138737	diffreps_peak_00139811	6.85536	436	ENSMUST00000181918	Gm26586	2.24422	1.39521e-07	6.80752e-06	up	Ensembl	1745	chr8:72137389-72140820-	natural antisense	NM_001001491	Tpm4	chr8:72135292-72153129+
chr7	45924497	45924820	diffreps_peak_00128577	10.7634	323	ENSMUST00000146062	Ccdc114	11.9065	1.72412e-11	1.26899e-08	up	Ensembl	741	chr7:45924216-45925067+	exon sense-overlapping	ENSMUST00000120643	Ccdc114	chr7:45924072-45931607+
chr7	24917894	24918280	diffreps_peak_00126016	8.55744	386	ENSMUST00000144714	Arhgef1	4.20194	2.77051e-09	4.29464e-07	up	Ensembl	1087	chr7:24912617-24918392+	exon sense-overlapping	ENSMUST00000132751	Arhgef1	chr7:24916831-24926106+
chr7	29791021	29791580	diffreps_peak_00127093	8.35486	559	ENSMUST00000126504	Zfp30	22.8228	4.4171e-09	5.9085e-07	up	Ensembl	3707	chr7:29784023-29791912+	exon sense-overlapping	ENSMUST00000032803	Zfp30	chr7:29783998-29794702+
chr8	122483041	122483600	diffreps_peak_00143716	8.46242	559	ENSMUST00000123671	Piezo1	3.93229	3.44811e-09	4.98667e-07	up	Ensembl	2860	chr8:122481721-122484780-	exon sense-overlapping	NM_001037298	Piezo1	chr8:122481698-122551329-
chr6	34685962	34686340	diffreps_peak_00117740	10.0406	378	ENSMUST00000155714	Cald1	4.01758	9.10647e-11	3.71006e-08	up	Ensembl	1422	chr6:34598544-34687173+	exon sense-overlapping	ENSMUST00000142512	Cald1	chr6:34598512-34753588+
chr11	3352501	3352817	diffreps_peak_00017723	5.51748	316	ENSMUST00000148771	Limk2	4.66667	3.03751e-06	7.74504e-05	up	Ensembl	716	chr11:3350392-3352817-	exon sense-overlapping	ENSMUST00000110029	Limk2	chr11:3344256-3356141-
chr17	5816381	5816700	diffreps_peak_00058923	8.95309	319	ENSMUST00000089182	Gm10231	2.07041	1.11407e-09	2.30842e-07	up	Ensembl	647	chr17:5816054-5816700-	intergenic	NA	NA	NA
chr9	107559261	107559720	diffreps_peak_00151639	8.88394	459	ENSMUST00000129320	Rassf1	100.7	1.30635e-09	2.58155e-07	up	Ensembl	2375	chr9:107557942-107560435+	exon sense-overlapping	ENSMUST00000122225	Rassf1	chr9:107551567-107562263+
chr18	65620381	65620700	diffreps_peak_00069071	8.1278	319	ENSMUST00000183157	Zfp532	30.7879	7.45072e-09	8.45988e-07	up	Ensembl	5267	chr18:65619660-65624926+	exon sense-overlapping	ENSMUST00000169679	Zfp532	chr18:65582526-65688940+
chr2	170406101	170406470	diffreps_peak_00085978	5.06076	369	ENSMUST00000133586	Gm14259	4.17704	8.69444e-06	0.000177977	up	Ensembl	1239	chr2:170405181-170407175+	natural antisense	ENSMUST00000068137	Bcas1	chr2:170347144-170427845-
chr10	8885701	8886160	diffreps_peak_00010143	7.34407	459	ENSMUST00000180770	Gm26674	2.35323	4.5282e-08	2.92965e-06	up	Ensembl	1491	chr10:8884594-8886880+	natural antisense	ENSMUST00000015449	Sash1	chr10:8722219-8886070-
chr6	72629955	72630270	diffreps_peak_00119553	6.52115	315	ENSMUST00000141743	Tcf7l1	2.68281	3.01199e-07	1.24276e-05	up	Ensembl	518	chr6:72627591-72630270-	exon sense-overlapping	ENSMUST00000069536	Tcf7l1	chr6:72626378-72789254-
chr2	101797420	101797720	diffreps_peak_00080698	9.30069	300	ENSMUST00000140387	Prr5l	156	5.00393e-10	1.27542e-07	up	Ensembl	427	chr2:101772295-101797733-	exon sense-overlapping	NM_001110849	Prr5l	chr2:101714285-101838980-
chr7	24919221	24919640	diffreps_peak_00126020	6.80687	419	ENSMUST00000129928	Arhgef1	2.20107	1.56003e-07	7.40027e-06	up	Ensembl	777	chr7:24919202-24922379+	exon sense-overlapping	ENSMUST00000098683	Arhgef1	chr7:24903051-24926589+
chr1	171275081	171275460	diffreps_peak_00008278	7.33337	379	ENSMUST00000132890	B4galt3	87.7	4.64123e-08	2.98435e-06	up	Ensembl	3261	chr1:171273515-171276894+	exon sense-overlapping	NM_020579	B4galt3	chr1:171270328-171276895+
chr12	3805801	3806160	diffreps_peak_00029000	7.85805	359	uc007mwz.1	BC048080	14.5588	1.38661e-08	1.25787e-06	up	UCSC_knowngene	2910	chr12:3803312-3806221-	bidirectional	uc007mxa.2	Dnmt3a	chr12:3806523-3867484+
chr2	101797420	101797720	diffreps_peak_00080698	9.30069	300	ENSMUST00000140387	Prr5l	156	5.00393e-10	1.27542e-07	up	Ensembl	427	chr2:101772295-101797733-	exon sense-overlapping	ENSMUST00000141814	Prr5l	chr2:101717250-101797650-
chr11	3352501	3352817	diffreps_peak_00017723	5.51748	316	ENSMUST00000148771	Limk2	4.66667	3.03751e-06	7.74504e-05	up	Ensembl	716	chr11:3350392-3352817-	exon sense-overlapping	ENSMUST00000101642	Limk2	chr11:3344256-3371376-
chr16	91862821	91863200	diffreps_peak_00058143	8.74157	379	ENSMUST00000138117	Itsn1	35.0476	1.81312e-09	3.21973e-07	up	Ensembl	2818	chr16:91862026-91871347+	intronic antisense	ENSMUST00000159295	Atp5o	chr16:91684398-91926982-
chr19	55742881	55743197	diffreps_peak_00074482	7.33197	316	ENSMUST00000133008	Tcf7l2	3.99822	4.65618e-08	2.99209e-06	up	Ensembl	691	chr19:55742845-55910681+	exon sense-overlapping	NM_009333	Tcf7l2	chr19:55741810-55933655+
chr5	115544113	115544569	diffreps_peak_00111662	10.1739	456	ENSMUST00000134198	Pxn	2.3463	6.70044e-11	3.04973e-08	up	Ensembl	524	chr5:115544114-115544948+	exon sense-overlapping	NM_133915	Pxn	chr5:115506676-115555987+
chr6	72629955	72630270	diffreps_peak_00119553	6.52115	315	ENSMUST00000141743	Tcf7l1	2.68281	3.01199e-07	1.24276e-05	up	Ensembl	518	chr6:72627591-72630270-	exon sense-overlapping	NM_001079822	Tcf7l1	chr6:72626371-72789045-
chr10	24595301	24595801	diffreps_peak_00010808	5.10649	500	ENSMUST00000125158	Gm15270	2.83929	7.82551e-06	0.000165292	up	Ensembl	870	chr10:24595249-24597108-	natural antisense	NM_010217	Ctgf	chr10:24595442-24598682+
chr18	65620381	65620700	diffreps_peak_00069071	8.1278	319	ENSMUST00000183157	Zfp532	30.7879	7.45072e-09	8.45988e-07	up	Ensembl	5267	chr18:65619660-65624926+	exon sense-overlapping	ENSMUST00000183236	Zfp532	chr18:65580382-65623519+
chr12	80112682	80113000	diffreps_peak_00032147	10.1178	318	ENSMUST00000181323	Gm26669	2.80167	7.62398e-11	3.26437e-08	up	Ensembl	1808	chr12:80108034-80113000+	natural antisense	ENSMUST00000165114	Zfp36l1	chr12:80108698-80112998-
chr17	6921421	6921739	diffreps_peak_00059074	5.08452	318	uc008ahz.1	Rsph3b	4.59443	8.23145e-06	0.000170526	up	UCSC_knowngene	1338	chr17:6920869-6948356-	exon sense-overlapping	ENSMUST00000024572	Rsph3b	chr17:6904716-6948356-
chr5	24429141	24429578	diffreps_peak_00106035	9.39705	437	ENSMUST00000155636	Slc4a2	2.15299	4.00818e-10	1.09708e-07	up	Ensembl	637	chr5:24429018-24429779+	exon sense-overlapping	NM_009207	Slc4a2	chr5:24425232-24440947+
chr7	28370481	28370900	diffreps_peak_00126776	7.81853	419	uc009fyr.1	Plekhg2	3.23336	1.51871e-08	1.33458e-06	up	UCSC_knowngene	1954	chr7:28368679-28372662-	exon sense-overlapping	ENSMUST00000121085	Plekhg2	chr7:28359605-28371574-
chr11	3531181	3531800	diffreps_peak_00017765	9.5213	619	ENSMUST00000123459	Gm11946	3.50107	3.01095e-10	8.89085e-08	up	Ensembl	3941	chr11:3530948-3536856+	natural antisense	ENSMUST00000136243	Smtn	chr11:3532603-3539251-
chr3	145652061	145652472	diffreps_peak_00093498	7.10927	411	uc012czd.2	FJ422280	2.60785	7.77561e-08	4.31942e-06	up	UCSC_knowngene	1699	chr3:145650312-145652472+	bidirectional	NM_010516	Cyr61	chr3:145646971-145649985-
chr5	103811062	103811380	diffreps_peak_00110147	7.81076	318	ENSMUST00000152145	Aff1	22.2034	1.54612e-08	1.35345e-06	up	Ensembl	688	chr5:103784359-103811595+	exon sense-overlapping	NM_133919	Aff1	chr5:103754162-103855322+
chr6	86526481	86526980	diffreps_peak_00120344	5.23067	499	uc009csd.1	1600020E01Rik	2.2304	5.87934e-06	0.00013054	up	UCSC_knowngene	2099	chr6:86526271-86564449+	bidirectional	ENSMUST00000053015	Pcbp1	chr6:86524499-86526171-
chr19	3897481	3897831	diffreps_peak_00070649	5.30542	350	ENSMUST00000134698	Tcirg1	3.45688	4.94976e-06	0.000113792	up	Ensembl	463	chr19:3897071-3897831-	exon sense-overlapping	NM_016921	Tcirg1	chr19:3896050-3905230-
chr1	45389101	45389680	diffreps_peak_00001963	7.93745	579	ENSMUST00000150143	Col5a2	5.61072	1.15492e-08	1.12702e-06	up	Ensembl	2951	chr1:45389031-45393634-	exon sense-overlapping	NM_007737	Col5a2	chr1:45374331-45503282-
chr7	4752161	4752528	diffreps_peak_00124669	8.10185	367	ENSMUST00000182272	Cox6b2	3.42228	7.90947e-09	8.78993e-07	up	Ensembl	519	chr7:4751925-4752528-	exon sense-overlapping	NM_001289848	Cox6b2	chr7:4751792-4753094-
chr9	107559261	107559720	diffreps_peak_00151639	8.88394	459	ENSMUST00000129320	Rassf1	100.7	1.30635e-09	2.58155e-07	up	Ensembl	2375	chr9:107557942-107560435+	exon sense-overlapping	ENSMUST00000093786	Rassf1	chr9:107551555-107562263+
chr11	3531181	3531800	diffreps_peak_00017765	9.5213	619	ENSMUST00000123459	Gm11946	3.50107	3.01095e-10	8.89085e-08	up	Ensembl	3941	chr11:3530948-3536856+	natural antisense	ENSMUST00000156201	Smtn	chr11:3532460-3540612-
chr3	90258221	90258526	diffreps_peak_00090701	6.72758	305	ENSMUST00000135002	Crtc2	11.6383	1.87251e-07	8.54438e-06	up	Ensembl	652	chr3:90258051-90259492+	exon sense-overlapping	ENSMUST00000029545	Crtc2	chr3:90254163-90264125+
chr9	57095247	57095581	diffreps_peak_00148484	7.48182	334	ENSMUST00000165927	Sin3a	2.16236	3.29745e-08	2.33174e-06	up	Ensembl	641	chr9:57095248-57097880+	exon sense-overlapping	NM_011378	Sin3a	chr9:57076376-57128368+
chr2	128660804	128661140	diffreps_peak_00082319	7.25555	336	ENSMUST00000123503	Anapc1	17.7288	5.55205e-08	3.40037e-06	up	Ensembl	3261	chr2:128657721-128663177-	exon sense-overlapping	NM_008569	Anapc1	chr2:128610083-128687395-
chr3	75878645	75879000	diffreps_peak_00089544	8.43522	355	ENSMUST00000134219	Golim4	3.5282	3.67093e-09	5.21631e-07	up	Ensembl	2062	chr3:75876479-75879008-	exon sense-overlapping	ENSMUST00000117242	Golim4	chr3:75876183-75956949-
chr1	74393277	74393901	diffreps_peak_00003308	7.70708	624	ENSMUST00000141175	Ctdsp1	2.30349	1.96301e-08	1.61491e-06	up	Ensembl	2957	chr1:74391795-74397282+	exon sense-overlapping	ENSMUST00000152659	Ctdsp1	chr1:74392162-74394069+
chr11	3531181	3531800	diffreps_peak_00017765	9.5213	619	ENSMUST00000123459	Gm11946	3.50107	3.01095e-10	8.89085e-08	up	Ensembl	3941	chr11:3530948-3536856+	natural antisense	ENSMUST00000075118	Smtn	chr11:3517523-3539239-
chr8	61708701	61709067	diffreps_peak_00138902	6.6657	366	ENSMUST00000123523	Palld	3.99139	2.15925e-07	9.55079e-06	up	Ensembl	2487	chr8:61707212-61760089-	exon sense-overlapping	ENSMUST00000121493	Palld	chr8:61513252-61760089-
chr16	91862821	91863200	diffreps_peak_00058143	8.74157	379	ENSMUST00000138117	Itsn1	35.0476	1.81312e-09	3.21973e-07	up	Ensembl	2818	chr16:91862026-91871347+	exon sense-overlapping	NM_001110275	Itsn1	chr16:91729371-91871655+
chr11	68270542	68270879	diffreps_peak_00021741	10.6675	337	ENSMUST00000151817	Gm12305	7.35357	2.15037e-11	1.44009e-08	up	Ensembl	407	chr11:68269558-68270879-	intron sense-overlapping	ENSMUST00000021284	Ntn1	chr11:68209364-68386826-
chr18	65620381	65620700	diffreps_peak_00069071	8.1278	319	ENSMUST00000183157	Zfp532	30.7879	7.45072e-09	8.45988e-07	up	Ensembl	5267	chr18:65619660-65624926+	exon sense-overlapping	ENSMUST00000182684	Zfp532	chr18:65582239-65623655+
chr18	23774341	23774660	diffreps_peak_00066410	5.76852	319	ENSMUST00000132286	Mapre2	14.3036	1.70406e-06	4.8427e-05	up	Ensembl	2169	chr18:23752333-23774684+	exon sense-overlapping	ENSMUST00000170802	Mapre2	chr18:23752333-23893861+
chr2	25466710	25467300	diffreps_peak_00076264	7.21817	590	ENSMUST00000144016	Ptgds	4.89385	6.05108e-08	3.59327e-06	up	Ensembl	1327	chr2:25466711-25469383-	exon sense-overlapping	NM_008963	Ptgds	chr2:25466712-25469749-
chr6	114920821	114921260	diffreps_peak_00122079	8.25585	439	uc009dii.1	AK078466	6.0712	5.54823e-09	6.83693e-07	up	UCSC_knowngene	1763	chr6:114920054-114921816-	intron sense-overlapping	ENSMUST00000139640	Vgll4	chr6:114862764-114969994-
chr7	45924497	45924820	diffreps_peak_00128577	10.7634	323	ENSMUST00000146062	Ccdc114	11.9065	1.72412e-11	1.26899e-08	up	Ensembl	741	chr7:45924216-45925067+	exon sense-overlapping	ENSMUST00000117998	Ccdc114	chr7:45924243-45931613+
chr8	32008921	32009660	diffreps_peak_00137722	11.7251	739	ENSMUST00000181702	Gm26578	3.19509	1.8832e-12	4.59427e-09	up	Ensembl	4611	chr8:32008504-32015759+	intergenic	NA	NA	NA
chr2	25466710	25467300	diffreps_peak_00076264	7.21817	590	ENSMUST00000144016	Ptgds	4.89385	6.05108e-08	3.59327e-06	up	Ensembl	1327	chr2:25466711-25469383-	exon sense-overlapping	ENSMUST00000114251	Ptgds	chr2:25466709-25470046-
chr12	3805801	3806160	diffreps_peak_00029000	7.85805	359	uc007mwz.1	BC048080	14.5588	1.38661e-08	1.25787e-06	up	UCSC_knowngene	2910	chr12:3803312-3806221-	bidirectional	ENSMUST00000020991	Dnmt3a	chr12:3807030-3914443+
chr9	85842781	85843340	diffreps_peak_00150348	5.06638	559	uc009qwy.1	AK162386	2.11485	8.58271e-06	0.000176059	up	UCSC_knowngene	2334	chr9:85820241-85844131-	natural antisense	NM_011627	Tpbg	chr9:85842380-85847055+
chr19	55742881	55743197	diffreps_peak_00074482	7.33197	316	ENSMUST00000133008	Tcf7l2	3.99822	4.65618e-08	2.99209e-06	up	Ensembl	691	chr19:55742845-55910681+	exon sense-overlapping	NM_001142924	Tcf7l2	chr19:55895321-55933655+
chr7	4752161	4752528	diffreps_peak_00124669	8.10185	367	ENSMUST00000182272	Cox6b2	3.42228	7.90947e-09	8.78993e-07	up	Ensembl	519	chr7:4751925-4752528-	exon sense-overlapping	NM_001289850	Cox6b2	chr7:4751792-4753094-
chr9	85842781	85843340	diffreps_peak_00150348	5.06638	559	uc009qwy.1	AK162386	2.11485	8.58271e-06	0.000176059	up	UCSC_knowngene	2334	chr9:85820241-85844131-	natural antisense	ENSMUST00000098500	Tpbg	chr9:85842852-85847055+
chr11	32213261	32213600	diffreps_peak_00019218	5.13475	339	ENSMUST00000143036	Rhbdf1	2.59475	7.33252e-06	0.000156557	up	Ensembl	5089	chr11:32209586-32217317-	exon sense-overlapping	NM_001291818	Rhbdf1	chr11:32209585-32222293-
chr11	32213261	32213600	diffreps_peak_00019218	5.13475	339	ENSMUST00000143036	Rhbdf1	2.59475	7.33252e-06	0.000156557	up	Ensembl	5089	chr11:32209586-32217317-	exon sense-overlapping	ENSMUST00000020524	Rhbdf1	chr11:32209585-32222300-
chr2	101797420	101797720	diffreps_peak_00080698	9.30069	300	ENSMUST00000140387	Prr5l	156	5.00393e-10	1.27542e-07	up	Ensembl	427	chr2:101772295-101797733-	exon sense-overlapping	NM_001083810	Prr5l	chr2:101714285-101797707-
chr11	32213261	32213600	diffreps_peak_00019218	5.13475	339	ENSMUST00000143036	Rhbdf1	2.59475	7.33252e-06	0.000156557	up	Ensembl	5089	chr11:32209586-32217317-	exon sense-overlapping	ENSMUST00000150381	Rhbdf1	chr11:32215068-32222244-
chr10	8885701	8886160	diffreps_peak_00010143	7.34407	459	ENSMUST00000180770	Gm26674	2.35323	4.5282e-08	2.92965e-06	up	Ensembl	1491	chr10:8884594-8886880+	natural antisense	NM_175155	Sash1	chr10:8722219-8886070-
chr19	55742881	55743197	diffreps_peak_00074482	7.33197	316	ENSMUST00000133008	Tcf7l2	3.99822	4.65618e-08	2.99209e-06	up	Ensembl	691	chr19:55742845-55910681+	exon sense-overlapping	ENSMUST00000111657	Tcf7l2	chr19:55741810-55933654+
chr3	75878645	75879000	diffreps_peak_00089544	8.43522	355	ENSMUST00000134219	Golim4	3.5282	3.67093e-09	5.21631e-07	up	Ensembl	2062	chr3:75876479-75879008-	exon sense-overlapping	NM_001291069	Golim4	chr3:75876183-75956949-
chr12	3805801	3806160	diffreps_peak_00029000	7.85805	359	uc007mwz.1	BC048080	14.5588	1.38661e-08	1.25787e-06	up	UCSC_knowngene	2910	chr12:3803312-3806221-	bidirectional	uc007mxc.1	Dnmt3a	chr12:3807160-3914443+
chr5	137633848	137634180	diffreps_peak_00114820	5.49809	332	ENSMUST00000176988	Lrch4	3.866	3.17622e-06	8.02481e-05	up	Ensembl	891	chr5:137629143-137636799+	exon sense-overlapping	NM_146164	Lrch4	chr5:137629123-137641099+
chr2	122147716	122148060	diffreps_peak_00082006	7.41181	344	uc008mag.1	BC002288	2.21913	3.87423e-08	2.62805e-06	up	UCSC_knowngene	1644	chr2:122147717-122149360+	intronic antisense	NM_026251	Patl2	chr2:122120108-122186189-
chr1	131714461	131714780	diffreps_peak_00005889	5.6305	319	uc007cnr.1	5430435G22Rik	65.7	2.34151e-06	6.24954e-05	up	UCSC_knowngene	4104	chr1:131688695-131715439+	exon sense-overlapping	ENSMUST00000129905	5430435G22Rik	chr1:131688766-131711830+
chr19	55742881	55743197	diffreps_peak_00074482	7.33197	316	ENSMUST00000133008	Tcf7l2	3.99822	4.65618e-08	2.99209e-06	up	Ensembl	691	chr19:55742845-55910681+	exon sense-overlapping	ENSMUST00000111659	Tcf7l2	chr19:55742058-55932209+
chr9	85842781	85843340	diffreps_peak_00150348	5.06638	559	uc009qwy.1	AK162386	2.11485	8.58271e-06	0.000176059	up	UCSC_knowngene	2334	chr9:85820241-85844131-	exon sense-overlapping	ENSMUST00000069896	9330154J02Rik	chr9:85820241-85843285-
chr19	55742881	55743197	diffreps_peak_00074482	7.33197	316	ENSMUST00000133008	Tcf7l2	3.99822	4.65618e-08	2.99209e-06	up	Ensembl	691	chr19:55742845-55910681+	exon sense-overlapping	NM_001142923	Tcf7l2	chr19:55741810-55933655+
chr8	61708701	61709067	diffreps_peak_00138902	6.6657	366	ENSMUST00000123523	Palld	3.99139	2.15925e-07	9.55079e-06	up	Ensembl	2487	chr8:61707212-61760089-	exon sense-overlapping	NM_001081390	Palld	chr8:61515021-61902690-
chr2	164996621	164996940	diffreps_peak_00085339	6.83195	319	ENSMUST00000137302	Slc12a5	13.7619	1.47249e-07	7.09842e-06	up	Ensembl	3001	chr2:164996591-164999727+	exon sense-overlapping	NM_020333	Slc12a5	chr2:164967988-164999731+
chr19	55742881	55743197	diffreps_peak_00074482	7.33197	316	ENSMUST00000133008	Tcf7l2	3.99822	4.65618e-08	2.99209e-06	up	Ensembl	691	chr19:55742845-55910681+	exon sense-overlapping	NM_001142922	Tcf7l2	chr19:55741810-55933655+
chr7	24919221	24919640	diffreps_peak_00126020	6.80687	419	ENSMUST00000129928	Arhgef1	2.20107	1.56003e-07	7.40027e-06	up	Ensembl	777	chr7:24919202-24922379+	exon sense-overlapping	NM_001130153	Arhgef1	chr7:24902986-24926591+
chr11	90657701	90658208	diffreps_peak_00024638	5.9886	507	ENSMUST00000147329	Tom1l1	2.8566	1.02659e-06	3.23009e-05	up	Ensembl	2694	chr11:90657072-90663312-	exon sense-overlapping	ENSMUST00000107868	Tom1l1	chr11:90645691-90687601-
chr15	81953081	81953504	diffreps_peak_00050353	7.84333	423	ENSMUST00000129406	Pmm1	7.45848	1.43441e-08	1.28194e-06	up	Ensembl	1107	chr15:81951402-81953504-	exon sense-overlapping	NM_001282041	Pmm1	chr15:81951106-81960930-
chr17	28999801	29000120	diffreps_peak_00061031	7.39095	319	ENSMUST00000145298	Stk38	2.85125	4.06491e-08	2.72047e-06	up	Ensembl	2767	chr17:28997564-29007896-	exon sense-overlapping	ENSMUST00000119274	Stk38	chr17:28972237-29007937-
chr18	73863630	73864220	diffreps_peak_00069566	7.53225	590	ENSMUST00000139821	Mro	3.09871	2.93593e-08	2.15723e-06	up	Ensembl	1877	chr18:73863631-73870209+	exon sense-overlapping	ENSMUST00000120033	Mro	chr18:73859385-73878730+
chr2	164996621	164996940	diffreps_peak_00085339	6.83195	319	ENSMUST00000137302	Slc12a5	13.7619	1.47249e-07	7.09842e-06	up	Ensembl	3001	chr2:164996591-164999727+	exon sense-overlapping	ENSMUST00000099092	Slc12a5	chr2:164967983-164999727+
chr4	43518401	43518900	diffreps_peak_00095961	7.13014	499	ENSMUST00000150262	Tpm2	4.65952	7.41063e-08	4.17668e-06	up	Ensembl	1545	chr4:43514711-43523438-	exon sense-overlapping	ENSMUST00000107914	Tpm2	chr4:43514711-43523595-
chr6	72629955	72630270	diffreps_peak_00119553	6.52115	315	ENSMUST00000141743	Tcf7l1	2.68281	3.01199e-07	1.24276e-05	up	Ensembl	518	chr6:72627591-72630270-	exon sense-overlapping	ENSMUST00000114053	Tcf7l1	chr6:72627272-72788952-
chr16	91862821	91863200	diffreps_peak_00058143	8.74157	379	ENSMUST00000138117	Itsn1	35.0476	1.81312e-09	3.21973e-07	up	Ensembl	2818	chr16:91862026-91871347+	exon sense-overlapping	ENSMUST00000113999	Itsn1	chr16:91729353-91871651+
chr5	110386581	110387260	diffreps_peak_00110662	5.57965	679	ENSMUST00000180866	Gm26711	2.65366	2.6324e-06	6.87023e-05	up	Ensembl	1833	chr5:110385835-110388073+	natural antisense	ENSMUST00000056124	Fbrsl1	chr5:110361754-110387127-
chr7	24919221	24919640	diffreps_peak_00126020	6.80687	419	ENSMUST00000129928	Arhgef1	2.20107	1.56003e-07	7.40027e-06	up	Ensembl	777	chr7:24919202-24922379+	exon sense-overlapping	ENSMUST00000132751	Arhgef1	chr7:24916831-24926106+
chr11	32213821	32214304	diffreps_peak_00019219	5.09154	483	ENSMUST00000143036	Rhbdf1	2.19395	8.09954e-06	0.000168458	up	Ensembl	5089	chr11:32209586-32217317-	exon sense-overlapping	ENSMUST00000020524	Rhbdf1	chr11:32209585-32222300-
chr16	42907421	42907721	diffreps_peak_00056322	7.29723	300	ENSMUST00000131689	Zbtb20	3.37936	5.04392e-08	3.16872e-06	up	Ensembl	425	chr16:42907392-43072468+	exon sense-overlapping	ENSMUST00000151244	Zbtb20	chr16:42907645-43577725+
chr18	65620381	65620700	diffreps_peak_00069071	8.1278	319	ENSMUST00000183157	Zfp532	30.7879	7.45072e-09	8.45988e-07	up	Ensembl	5267	chr18:65619660-65624926+	exon sense-overlapping	ENSMUST00000182140	Zfp532	chr18:65581087-65623508+
chr17	79012581	79013080	diffreps_peak_00064821	5.96295	499	ENSMUST00000130070	Prkd3	5.05119	1.08906e-06	3.39435e-05	up	Ensembl	3508	chr17:79010127-79020777-	exon sense-overlapping	NM_029239	Prkd3	chr17:78949405-79020816-
chr5	137633848	137634180	diffreps_peak_00114820	5.49809	332	ENSMUST00000176988	Lrch4	3.866	3.17622e-06	8.02481e-05	up	Ensembl	891	chr5:137629143-137636799+	exon sense-overlapping	NM_001168652	Lrch4	chr5:137629123-137641099+
chr15	79154908	79155300	diffreps_peak_00049787	7.22364	392	uc029stk.1	Sox10	3.11694	5.97529e-08	3.56788e-06	up	UCSC_knowngene	397	chr15:79154909-79155305-	exon sense-overlapping	NM_011437	Sox10	chr15:79154913-79164490-
chr11	3531181	3531800	diffreps_peak_00017765	9.5213	619	ENSMUST00000123459	Gm11946	3.50107	3.01095e-10	8.89085e-08	up	Ensembl	3941	chr11:3530948-3536856+	natural antisense	ENSMUST00000110011	Smtn	chr11:3517523-3537398-
chr9	85842781	85843340	diffreps_peak_00150348	5.06638	559	uc009qwy.1	AK162386	2.11485	8.58271e-06	0.000176059	up	UCSC_knowngene	2334	chr9:85820241-85844131-	natural antisense	ENSMUST00000006559	Tpbg	chr9:85842380-85847055+

## Sheet: Up-OGDR3h_vs_control
Chromosome	Transcript start	Transcript end	Peak ID	Score	Peak length	Transcript ID	Gene mame	Fold change	P value	FDR	Regulation	Source	RNA length	Coordinates	Relationship	Transcript ID	Associated gene name	Associated gene coordinates
chr7	4752141	4752528	diffreps_peak_00118384	7.2937	387	ENSMUST00000182272	Cox6b2	3.94714	5.08514e-08	2.10929e-06	up	Ensembl	519	chr7:4751925-4752528-	exon sense-overlapping	ENSMUST00000184143	Cox6b2	chr7:4751792-4753023-
chr9	92542521	92542840	diffreps_peak_00143035	6.3511	319	NR_029474	B430319G15Rik	2.31124	4.45551e-07	1.12546e-05	up	RefSeq	4069	chr9:92538801-92542869-	natural antisense	NM_001142916	Plod2	chr9:92542223-92608427+
chr2	51960301	51960660	diffreps_peak_00074419	5.86748	359	ENSMUST00000123521	Nmi	2.94189	1.35683e-06	2.804e-05	up	Ensembl	487	chr2:51960236-51972970-	exon sense-overlapping	ENSMUST00000028314	Nmi	chr2:51948487-51973224-
chr5	37318162	37318491	diffreps_peak_00102204	6.91801	329	ENSMUST00000124426	Evc	2.47912	1.20779e-07	3.99828e-06	up	Ensembl	537	chr5:37316216-37318491-	exon sense-overlapping	NM_021292	Evc	chr5:37299171-37336881-
chr16	24393353	24393655	diffreps_peak_00052031	7.20759	302	NR_037954	1110054M08Rik	2.81649	6.20019e-08	2.42665e-06	up	RefSeq	876	chr16:24392556-24393655-	natural antisense	ENSMUST00000038053	Lpp	chr16:24393350-24992576+
chr6	34685962	34686340	diffreps_peak_00111770	10.2342	378	ENSMUST00000155714	Cald1	4.76261	5.83243e-11	1.65538e-08	up	Ensembl	1422	chr6:34598544-34687173+	exon sense-overlapping	ENSMUST00000115026	Cald1	chr6:34598565-34775466+
chr8	45736921	45737380	diffreps_peak_00131274	5.2886	459	ENSMUST00000136119	Sorbs2	4.4209	5.1452e-06	8.61843e-05	up	Ensembl	6425	chr8:45658784-45742419+	exon sense-overlapping	ENSMUST00000067107	Sorbs2	chr8:45507788-45827906+
chr11	54337401	54338100	diffreps_peak_00019358	8.14014	699	ENSMUST00000127731	Acsl6	4.45482	7.24203e-09	5.55377e-07	up	Ensembl	4358	chr11:54335497-54361539+	exon sense-overlapping	ENSMUST00000101211	Acsl6	chr11:54314936-54361535+
chr11	54337401	54338100	diffreps_peak_00019358	8.14014	699	ENSMUST00000127731	Acsl6	4.45482	7.24203e-09	5.55377e-07	up	Ensembl	4358	chr11:54335497-54361539+	exon sense-overlapping	ENSMUST00000156252	Acsl6	chr11:54320152-54339071+
chr1	93776081	93776560	diffreps_peak_00004449	7.51352	479	ENSMUST00000135762	Atg4b	31.7273	3.06536e-08	1.46441e-06	up	Ensembl	4186	chr1:93755045-93788179+	exon sense-overlapping	ENSMUST00000027502	Atg4b	chr1:93754905-93789434+
chr3	75878645	75879000	diffreps_peak_00084852	9.04354	355	ENSMUST00000134219	Golim4	2.53285	9.04598e-10	1.3021e-07	up	Ensembl	2062	chr3:75876479-75879008-	exon sense-overlapping	ENSMUST00000038563	Golim4	chr3:75876383-75956929-
chr8	45736921	45737380	diffreps_peak_00131274	5.2886	459	ENSMUST00000136119	Sorbs2	4.4209	5.1452e-06	8.61843e-05	up	Ensembl	6425	chr8:45658784-45742419+	exon sense-overlapping	NM_172752	Sorbs2	chr8:45507788-45827906+
chr5	115544113	115544569	diffreps_peak_00106070	6.88775	456	ENSMUST00000134198	Pxn	2.75982	1.29493e-07	4.23162e-06	up	Ensembl	524	chr5:115544114-115544948+	exon sense-overlapping	NM_011223	Pxn	chr5:115506676-115555987+
chr5	24429181	24429578	diffreps_peak_00100701	7.541	397	ENSMUST00000155636	Slc4a2	2.79997	2.87737e-08	1.39605e-06	up	Ensembl	637	chr5:24429018-24429779+	exon sense-overlapping	ENSMUST00000080067	Slc4a2	chr5:24425232-24440950+
chr19	3897481	3897831	diffreps_peak_00067041	5.75645	350	ENSMUST00000134698	Tcirg1	3.99542	1.75205e-06	3.48639e-05	up	Ensembl	463	chr19:3897071-3897831-	exon sense-overlapping	NM_001167784	Tcirg1	chr19:3896050-3906983-
chr6	34662127	34662460	diffreps_peak_00111769	8.20086	333	ENSMUST00000127055	Cald1	4.8655	6.29711e-09	5.0334e-07	up	Ensembl	667	chr6:34598620-34662748+	exon sense-overlapping	ENSMUST00000079391	Cald1	chr6:34598500-34775454+
chrX	74022632	74023197	diffreps_peak_00146930	10.9874	565	ENSMUST00000146210	Irak1	2.44874	1.0294e-11	5.19657e-09	up	Ensembl	576	chrX:74022633-74023376-	exon sense-overlapping	ENSMUST00000114354	Irak1	chrX:74013914-74023918-
chr3	75878645	75879000	diffreps_peak_00084852	9.04354	355	ENSMUST00000134219	Golim4	2.53285	9.04598e-10	1.3021e-07	up	Ensembl	2062	chr3:75876479-75879008-	exon sense-overlapping	ENSMUST00000117242	Golim4	chr3:75876183-75956949-
chr8	25675441	25675742	diffreps_peak_00130588	7.07686	301	uc009lgo.1	Whsc1l1	3.65759	8.37791e-08	3.04583e-06	up	UCSC_knowngene	2577	chr8:25674436-25677972+	exon sense-overlapping	ENSMUST00000155861	Whsc1l1	chr8:25601601-25677214+
chr8	45736921	45737380	diffreps_peak_00131274	5.2886	459	ENSMUST00000136119	Sorbs2	4.4209	5.1452e-06	8.61843e-05	up	Ensembl	6425	chr8:45658784-45742419+	exon sense-overlapping	ENSMUST00000149752	Sorbs2	chr8:45661993-45759092+
chr4	109403121	109403993	diffreps_peak_00094182	9.89442	872	NR_131195	Gm12750	2.48404	1.27522e-10	2.93836e-08	up	RefSeq	2532	chr4:109402279-109406257-	bidirectional	ENSMUST00000064129	Ttc39a	chr4:109407087-109444745+
chr7	78899370	78899699	diffreps_peak_00123697	6.51568	329	ENSMUST00000172017	Aen	2.68698	3.05013e-07	8.29956e-06	up	Ensembl	393	chr7:78895951-78899699+	exon sense-overlapping	NM_026531	Aen	chr7:78895927-78908833+
chr19	55742861	55743197	diffreps_peak_00070609	7.68884	336	ENSMUST00000133008	Tcf7l2	4.89606	2.04718e-08	1.09817e-06	up	Ensembl	691	chr19:55742845-55910681+	exon sense-overlapping	ENSMUST00000142291	Tcf7l2	chr19:55894534-55918966+
chr7	119783121	119783500	diffreps_peak_00126714	5.76717	379	ENSMUST00000125595	Eri2	9.95455	1.70935e-06	3.4141e-05	up	Ensembl	6025	chr7:119782573-119793975-	natural antisense	ENSMUST00000106527	Acsm3	chr7:119760923-119784893+
chr16	14170337	14170680	diffreps_peak_00051235	6.75701	343	ENSMUST00000133249	Nde1	2.51409	1.74981e-07	5.35475e-06	up	Ensembl	681	chr16:14163304-14170829+	exon sense-overlapping	NM_001114085	Nde1	chr16:14163275-14192923+
chr18	73863630	73864220	diffreps_peak_00065994	11.3138	590	ENSMUST00000139821	Mro	3.32929	4.85488e-12	3.42765e-09	up	Ensembl	1877	chr18:73863631-73870209+	exon sense-overlapping	ENSMUST00000120033	Mro	chr18:73859385-73878730+
chr7	127979181	127979620	diffreps_peak_00127631	7.95361	439	uc009jxs.1	AK134717	2.37481	1.11273e-08	7.34634e-07	up	UCSC_knowngene	1514	chr7:127978141-127979654+	exon sense-overlapping	ENSMUST00000106251	Fus	chr7:127967457-127982368+
chr6	34662127	34662460	diffreps_peak_00111769	8.20086	333	ENSMUST00000127055	Cald1	4.8655	6.29711e-09	5.0334e-07	up	Ensembl	667	chr6:34598620-34662748+	exon sense-overlapping	ENSMUST00000115027	Cald1	chr6:34598564-34775466+
chr9	107558861	107559200	diffreps_peak_00143980	6.37971	339	ENSMUST00000129320	Rassf1	13.475	4.17145e-07	1.06496e-05	up	Ensembl	2375	chr9:107557942-107560435+	exon sense-overlapping	ENSMUST00000122225	Rassf1	chr9:107551567-107562263+
chr4	148144861	148145196	diffreps_peak_00098396	5.73334	335	ENSMUST00000105708	Mad2l2	2.47125	1.84781e-06	3.63608e-05	up	Ensembl	487	chr4:148144790-148145451+	exon sense-overlapping	NM_001305420	Mad2l2	chr4:148130920-148145704+
chr19	55742861	55743197	diffreps_peak_00070609	7.68884	336	ENSMUST00000133008	Tcf7l2	4.89606	2.04718e-08	1.09817e-06	up	Ensembl	691	chr19:55742845-55910681+	exon sense-overlapping	ENSMUST00000148666	Tcf7l2	chr19:55898553-55919604+
chr8	45736921	45737380	diffreps_peak_00131274	5.2886	459	ENSMUST00000136119	Sorbs2	4.4209	5.1452e-06	8.61843e-05	up	Ensembl	6425	chr8:45658784-45742419+	exon sense-overlapping	ENSMUST00000171337	Sorbs2	chr8:45507788-45827906+
chr16	42907391	42907721	diffreps_peak_00053383	6.99568	330	ENSMUST00000131689	Zbtb20	3.24142	1.01001e-07	3.49434e-06	up	Ensembl	425	chr16:42907392-43072468+	exon sense-overlapping	NM_001285805	Zbtb20	chr16:42907645-43619123+
chr6	125164921	125165280	diffreps_peak_00116953	6.09847	359	ENSMUST00000144588	Gapdh	3.76012	7.97136e-07	1.80531e-05	up	Ensembl	769	chr6:125164597-125165605-	exon sense-overlapping	ENSMUST00000182052	Gapdh	chr6:125163175-125165603-
chr19	38735861	38736180	diffreps_peak_00069398	5.33731	319	ENSMUST00000183131	Plce1	15.7368	4.59923e-06	7.83085e-05	up	Ensembl	4220	chr19:38734914-38751123+	exon sense-overlapping	ENSMUST00000182267	Plce1	chr19:38524209-38782795+
chr3	75878645	75879000	diffreps_peak_00084852	9.04354	355	ENSMUST00000134219	Golim4	2.53285	9.04598e-10	1.3021e-07	up	Ensembl	2062	chr3:75876479-75879008-	exon sense-overlapping	NM_175193	Golim4	chr3:75876183-75956949-
chr7	4752141	4752528	diffreps_peak_00118384	7.2937	387	ENSMUST00000182272	Cox6b2	3.94714	5.08514e-08	2.10929e-06	up	Ensembl	519	chr7:4751925-4752528-	exon sense-overlapping	ENSMUST00000182048	Cox6b2	chr7:4751855-4753038-
chr8	25675441	25675742	diffreps_peak_00130588	7.07686	301	uc009lgo.1	Whsc1l1	3.65759	8.37791e-08	3.04583e-06	up	UCSC_knowngene	2577	chr8:25674436-25677972+	exon sense-overlapping	ENSMUST00000142395	Whsc1l1	chr8:25602284-25719667+
chr15	98209181	98209520	diffreps_peak_00049243	9.49597	339	uc007xmc.2	Olfr287	11.6623	3.19173e-10	5.88489e-08	up	UCSC_knowngene	1050	chr15:98208940-98221056-	exon sense-overlapping	ENSMUST00000155603	Olfr287	chr15:98207637-98220897-
chr4	43518401	43518920	diffreps_peak_00091098	7.63917	519	ENSMUST00000150262	Tpm2	4.40447	2.29527e-08	1.1871e-06	up	Ensembl	1545	chr4:43514711-43523438-	exon sense-overlapping	NM_001277876	Tpm2	chr4:43513726-43523554-
chr4	154645082	154645465	diffreps_peak_00099281	7.98116	383	ENSMUST00000183838	RP23-360O1.5	4.66881	1.04432e-08	7.06847e-07	up	Ensembl	512	chr4:154645083-154645701-	intergenic	NA	NA	NA
chr4	155840901	155841280	diffreps_peak_00099481	7.69255	379	ENSMUST00000133592	Mxra8	13.4615	2.02981e-08	1.09369e-06	up	Ensembl	564	chr4:155839830-155841280+	exon sense-overlapping	ENSMUST00000030947	Mxra8	chr4:155839726-155844088+
chr5	151072801	151073120	diffreps_peak_00110385	7.21479	319	ENSMUST00000146814	Stard13	4.53559	6.09825e-08	2.39627e-06	up	Ensembl	2480	chr5:151071264-151190150-	exon sense-overlapping	ENSMUST00000062015	Stard13	chr5:151037628-151190194-
chr2	132260585	132260900	diffreps_peak_00078500	9.6944	315	uc008mmm.1	AK007836	14.5	2.02115e-10	4.16385e-08	up	UCSC_knowngene	494	chr2:132253357-132260906+	bidirectional	ENSMUST00000028817	Pcna	chr2:132249162-132253314-
chr2	105692736	105693040	diffreps_peak_00076802	11.2961	304	ENSMUST00000147946	Pax6	2.78019	5.05698e-12	3.45953e-09	up	Ensembl	527	chr2:105692483-105693125+	exon sense-overlapping	ENSMUST00000090391	Pax6	chr2:105676128-105697071+
chr19	55742861	55743197	diffreps_peak_00070609	7.68884	336	ENSMUST00000133008	Tcf7l2	4.89606	2.04718e-08	1.09817e-06	up	Ensembl	691	chr19:55742845-55910681+	exon sense-overlapping	ENSMUST00000111653	Tcf7l2	chr19:55742269-55925236+
chr4	43518401	43518920	diffreps_peak_00091098	7.63917	519	ENSMUST00000150262	Tpm2	4.40447	2.29527e-08	1.1871e-06	up	Ensembl	1545	chr4:43514711-43523438-	exon sense-overlapping	ENSMUST00000107914	Tpm2	chr4:43514711-43523595-
chrX	74022632	74023197	diffreps_peak_00146930	10.9874	565	ENSMUST00000146210	Irak1	2.44874	1.0294e-11	5.19657e-09	up	Ensembl	576	chrX:74022633-74023376-	exon sense-overlapping	ENSMUST00000033769	Irak1	chrX:74014971-74023913-
chrX	74022632	74023197	diffreps_peak_00146930	10.9874	565	ENSMUST00000146210	Irak1	2.44874	1.0294e-11	5.19657e-09	up	Ensembl	576	chrX:74022633-74023376-	exon sense-overlapping	ENSMUST00000114352	Irak1	chrX:74013918-74023915-
chr10	24595321	24595801	diffreps_peak_00010204	10.5975	480	ENSMUST00000125158	Gm15270	3.7294	2.52612e-11	9.21255e-09	up	Ensembl	870	chr10:24595249-24597108-	natural antisense	NM_010217	Ctgf	chr10:24595442-24598682+
chr8	122483241	122483620	diffreps_peak_00136528	12.3648	379	ENSMUST00000123671	Piezo1	3.85767	4.31754e-13	1.00772e-09	up	Ensembl	2860	chr8:122481721-122484780-	exon sense-overlapping	ENSMUST00000156333	Piezo1	chr8:122481712-122499886-
chrX	74022632	74023197	diffreps_peak_00146930	10.9874	565	ENSMUST00000146210	Irak1	2.44874	1.0294e-11	5.19657e-09	up	Ensembl	576	chrX:74022633-74023376-	exon sense-overlapping	ENSMUST00000132144	Irak1	chrX:74021000-74023091-
chr6	125164921	125165280	diffreps_peak_00116953	6.09847	359	ENSMUST00000144588	Gapdh	3.76012	7.97136e-07	1.80531e-05	up	Ensembl	769	chr6:125164597-125165605-	exon sense-overlapping	ENSMUST00000183272	Gapdh	chr6:125162064-125165576-
chr9	107558861	107559200	diffreps_peak_00143980	6.37971	339	ENSMUST00000129320	Rassf1	13.475	4.17145e-07	1.06496e-05	up	Ensembl	2375	chr9:107557942-107560435+	exon sense-overlapping	NM_019713	Rassf1	chr9:107554583-107562267+
chr3	75892782	75893082	diffreps_peak_00084858	10.6759	300	ENSMUST00000134444	Golim4	2.98571	2.10929e-11	8.25377e-09	up	Ensembl	563	chr3:75886771-75893082-	exon sense-overlapping	ENSMUST00000167078	Golim4	chr3:75877659-75956937-
chr19	55742861	55743197	diffreps_peak_00070609	7.68884	336	ENSMUST00000133008	Tcf7l2	4.89606	2.04718e-08	1.09817e-06	up	Ensembl	691	chr19:55742845-55910681+	exon sense-overlapping	NM_001142923	Tcf7l2	chr19:55741810-55933655+
chr5	115545371	115545805	diffreps_peak_00106071	5.58461	434	ENSMUST00000152156	Pxn	2.02322	2.60252e-06	4.84488e-05	up	Ensembl	3761	chr5:115506711-115555982+	exon sense-overlapping	NM_133915	Pxn	chr5:115506676-115555987+
chr1	186737587	186737960	diffreps_peak_00008824	5.22176	373	ENSMUST00000162336	Rrp15	2.38971	6.00117e-06	9.78535e-05	up	Ensembl	3092	chr1:186721092-186749325-	exon sense-overlapping	NM_026041	Rrp15	chr1:186721087-186749358-
chr6	34685962	34686340	diffreps_peak_00111770	10.2342	378	ENSMUST00000155714	Cald1	4.76261	5.83243e-11	1.65538e-08	up	Ensembl	1422	chr6:34598544-34687173+	exon sense-overlapping	ENSMUST00000115027	Cald1	chr6:34598564-34775466+
chr2	119812059	119812420	diffreps_peak_00077406	5.79975	361	ENSMUST00000147761	Tyro3	3.57246	1.5858e-06	3.20312e-05	up	Ensembl	3529	chr2:119809208-119818091+	exon sense-overlapping	NM_001290800	Tyro3	chr2:119797740-119818103+
chr4	128499241	128499720	diffreps_peak_00095889	5.42868	479	ENSMUST00000148247	Csmd2	3.19303	3.72669e-06	6.56029e-05	up	Ensembl	3320	chr4:128477154-128501177+	exon sense-overlapping	NM_001281955	Csmd2	chr4:127988044-128567656+
chrX	74022632	74023197	diffreps_peak_00146930	10.9874	565	ENSMUST00000146210	Irak1	2.44874	1.0294e-11	5.19657e-09	up	Ensembl	576	chrX:74022633-74023376-	exon sense-overlapping	NM_001177973	Irak1	chrX:74013914-74023921-
chr12	111795351	111795678	diffreps_peak_00032783	7.19695	327	ENSMUST00000141435	Klc1	2.95382	6.35405e-08	2.47127e-06	up	Ensembl	806	chr12:111795352-111806726+	exon sense-overlapping	NM_001025360	Klc1	chr12:111758849-111806775+
chr1	126528421	126528755	diffreps_peak_00005170	7.67459	334	ENSMUST00000162647	Nckap5	3.73323	2.11551e-08	1.12369e-06	up	Ensembl	1510	chr1:126527540-126830481-	exon sense-overlapping	NM_176957	Nckap5	chr1:125913636-126830632-
chr5	37318162	37318491	diffreps_peak_00102204	6.91801	329	ENSMUST00000124426	Evc	2.47912	1.20779e-07	3.99828e-06	up	Ensembl	537	chr5:37316216-37318491-	exon sense-overlapping	ENSMUST00000114148	Evc	chr5:37313269-37336866-
chr7	28370441	28370920	diffreps_peak_00120362	10.7587	479	uc009fyr.1	Plekhg2	4.07262	1.74317e-11	7.26333e-09	up	UCSC_knowngene	1954	chr7:28368679-28372662-	exon sense-overlapping	NM_001083912	Plekhg2	chr7:28359604-28372662-
chr6	125164921	125165280	diffreps_peak_00116953	6.09847	359	ENSMUST00000144588	Gapdh	3.76012	7.97136e-07	1.80531e-05	up	Ensembl	769	chr6:125164597-125165605-	exon sense-overlapping	NM_001289726	Gapdh	chr6:125161852-125166467-
chr7	119783121	119783500	diffreps_peak_00126714	5.76717	379	ENSMUST00000125595	Eri2	9.95455	1.70935e-06	3.4141e-05	up	Ensembl	6025	chr7:119782573-119793975-	exon sense-overlapping	ENSMUST00000150844	Eri2	chr7:119784896-119794058-
chr3	75892782	75893082	diffreps_peak_00084858	10.6759	300	ENSMUST00000134444	Golim4	2.98571	2.10929e-11	8.25377e-09	up	Ensembl	563	chr3:75886771-75893082-	exon sense-overlapping	NM_001291069	Golim4	chr3:75876183-75956949-
chr4	109403121	109403993	diffreps_peak_00094182	9.89442	872	NR_131195	Gm12750	2.48404	1.27522e-10	2.93836e-08	up	RefSeq	2532	chr4:109402279-109406257-	bidirectional	uc008ucj.2	Ttc39a	chr4:109407100-109444745+
chr4	43518401	43518920	diffreps_peak_00091098	7.63917	519	ENSMUST00000150262	Tpm2	4.40447	2.29527e-08	1.1871e-06	up	Ensembl	1545	chr4:43514711-43523438-	exon sense-overlapping	ENSMUST00000107913	Tpm2	chr4:43514712-43523388-
chr3	95009081	95009600	diffreps_peak_00086203	5.14961	519	ENSMUST00000146169	Zfp687	2.5677	7.08578e-06	0.000113067	up	Ensembl	4930	chr3:95006590-95011807-	exon sense-overlapping	ENSMUST00000019482	Zfp687	chr3:95006702-95015238-
chr3	145652021	145652472	diffreps_peak_00088691	11.427	451	uc012czd.2	FJ422280	6.31948	3.74153e-12	2.88829e-09	up	UCSC_knowngene	1699	chr3:145650312-145652472+	bidirectional	uc008rqq.2	Cyr61	chr3:145646971-145649985-
chr5	115545371	115545805	diffreps_peak_00106071	5.58461	434	ENSMUST00000152156	Pxn	2.02322	2.60252e-06	4.84488e-05	up	Ensembl	3761	chr5:115506711-115555982+	exon sense-overlapping	ENSMUST00000086523	Pxn	chr5:115506808-115554978+
chr11	75569561	75569940	diffreps_peak_00021579	6.31749	379	uc007kef.1	Slc43a2	62.6	4.814e-07	1.19415e-05	up	UCSC_knowngene	2292	chr11:75566007-75570189+	exon sense-overlapping	ENSMUST00000169547	Slc43a2	chr11:75532112-75577570+
chr8	45736921	45737380	diffreps_peak_00131274	5.2886	459	ENSMUST00000136119	Sorbs2	4.4209	5.1452e-06	8.61843e-05	up	Ensembl	6425	chr8:45658784-45742419+	exon sense-overlapping	ENSMUST00000143820	Sorbs2	chr8:45658804-45772653+
chrX	74022632	74023197	diffreps_peak_00146930	10.9874	565	ENSMUST00000146210	Irak1	2.44874	1.0294e-11	5.19657e-09	up	Ensembl	576	chrX:74022633-74023376-	exon sense-overlapping	ENSMUST00000101458	Irak1	chrX:74015440-74023745-
chr7	28370441	28370920	diffreps_peak_00120362	10.7587	479	uc009fyr.1	Plekhg2	4.07262	1.74317e-11	7.26333e-09	up	UCSC_knowngene	1954	chr7:28368679-28372662-	exon sense-overlapping	ENSMUST00000121085	Plekhg2	chr7:28359605-28371574-
chr1	121494821	121495200	diffreps_peak_00004947	6.37864	379	ENSMUST00000152959	Ccdc93	9.99213	4.18179e-07	1.06678e-05	up	Ensembl	3040	chr1:121491217-121499477+	exon sense-overlapping	ENSMUST00000112621	Ccdc93	chr1:121431110-121501588+
chr3	114147521	114147823	diffreps_peak_00087577	8.62206	302	ENSMUST00000138680	Col11a1	3.38913	2.38751e-09	2.6506e-07	up	Ensembl	2112	chr3:114147129-114153971+	exon sense-overlapping	NM_007729	Col11a1	chr3:114030540-114220326+
chr2	105692736	105693040	diffreps_peak_00076802	11.2961	304	ENSMUST00000147946	Pax6	2.78019	5.05698e-12	3.45953e-09	up	Ensembl	527	chr2:105692483-105693125+	exon sense-overlapping	NM_001244202	Pax6	chr2:105676129-105697364+
chr5	24429181	24429578	diffreps_peak_00100701	7.541	397	ENSMUST00000155636	Slc4a2	2.79997	2.87737e-08	1.39605e-06	up	Ensembl	637	chr5:24429018-24429779+	exon sense-overlapping	ENSMUST00000155598	Slc4a2	chr5:24426831-24429852+
chr8	25675441	25675742	diffreps_peak_00130588	7.07686	301	uc009lgo.1	Whsc1l1	3.65759	8.37791e-08	3.04583e-06	up	UCSC_knowngene	2577	chr8:25674436-25677972+	exon sense-overlapping	ENSMUST00000139966	Whsc1l1	chr8:25602284-25714970+
chr8	45736921	45737380	diffreps_peak_00131274	5.2886	459	ENSMUST00000136119	Sorbs2	4.4209	5.1452e-06	8.61843e-05	up	Ensembl	6425	chr8:45658784-45742419+	exon sense-overlapping	ENSMUST00000130850	Sorbs2	chr8:45628201-45746632+
chr2	91260961	91261406	diffreps_peak_00076025	9.49127	445	ENSMUST00000126754	Pacsin3	2.13311	3.2265e-10	5.93246e-08	up	Ensembl	761	chr2:91260805-91261669+	exon sense-overlapping	ENSMUST00000131711	Pacsin3	chr2:91257335-91261301+
chr2	105692736	105693040	diffreps_peak_00076802	11.2961	304	ENSMUST00000147946	Pax6	2.78019	5.05698e-12	3.45953e-09	up	Ensembl	527	chr2:105692483-105693125+	exon sense-overlapping	NM_013627	Pax6	chr2:105676129-105697364+
chr5	151072801	151073120	diffreps_peak_00110385	7.21479	319	ENSMUST00000146814	Stard13	4.53559	6.09825e-08	2.39627e-06	up	Ensembl	2480	chr5:151071264-151190150-	exon sense-overlapping	ENSMUST00000110483	Stard13	chr5:151037628-151190269-
chr9	85843441	85843780	diffreps_peak_00142775	8.74545	339	uc009qwy.1	AK162386	2.36918	1.79703e-09	2.1752e-07	up	UCSC_knowngene	2334	chr9:85820241-85844131-	natural antisense	NM_011627	Tpbg	chr9:85842380-85847055+
chr19	6126701	6127060	diffreps_peak_00067535	5.92042	359	uc008ghn.1	AK045837	7.62025	1.20111e-06	2.53363e-05	up	UCSC_knowngene	3077	chr19:6125103-6128179-	exon sense-overlapping	NM_026912	Snx15	chr19:6119404-6128215-
chr7	119783121	119783500	diffreps_peak_00126714	5.76717	379	ENSMUST00000125595	Eri2	9.95455	1.70935e-06	3.4141e-05	up	Ensembl	6025	chr7:119782573-119793975-	natural antisense	ENSMUST00000106528	Acsm3	chr7:119760923-119784889+
chr19	6126701	6127060	diffreps_peak_00067535	5.92042	359	uc008ghn.1	AK045837	7.62025	1.20111e-06	2.53363e-05	up	UCSC_knowngene	3077	chr19:6125103-6128179-	exon sense-overlapping	ENSMUST00000025702	Snx15	chr19:6119399-6128304-
chr2	35340821	35341160	diffreps_peak_00073794	6.22371	339	ENSMUST00000179063	Gm13443	4.80527	5.97433e-07	1.421e-05	up	Ensembl	956	chr2:35340361-35341316+	intergenic	NA	NA	NA
chr18	73863630	73864220	diffreps_peak_00065994	11.3138	590	ENSMUST00000139821	Mro	3.32929	4.85488e-12	3.42765e-09	up	Ensembl	1877	chr18:73863631-73870209+	exon sense-overlapping	ENSMUST00000119239	Mro	chr18:73859402-73878730+
chr7	119783121	119783500	diffreps_peak_00126714	5.76717	379	ENSMUST00000125595	Eri2	9.95455	1.70935e-06	3.4141e-05	up	Ensembl	6025	chr7:119782573-119793975-	natural antisense	NM_212442	Acsm3	chr7:119760923-119784891+
chr11	54337401	54338100	diffreps_peak_00019358	8.14014	699	ENSMUST00000127731	Acsl6	4.45482	7.24203e-09	5.55377e-07	up	Ensembl	4358	chr11:54335497-54361539+	exon sense-overlapping	ENSMUST00000101213	Acsl6	chr11:54314936-54361535+
chr16	14170337	14170680	diffreps_peak_00051235	6.75701	343	ENSMUST00000133249	Nde1	2.51409	1.74981e-07	5.35475e-06	up	Ensembl	681	chr16:14163304-14170829+	exon sense-overlapping	ENSMUST00000115795	Nde1	chr16:14163345-14192918+
chr11	68990801	68991159	diffreps_peak_00020602	8.31891	358	ENSMUST00000173410	Pfas	3.7785	4.79832e-09	4.16293e-07	up	Ensembl	927	chr11:68990721-68991825-	exon sense-overlapping	ENSMUST00000021282	Pfas	chr11:68985697-69008460-
chr5	37318162	37318491	diffreps_peak_00102204	6.91801	329	ENSMUST00000124426	Evc	2.47912	1.20779e-07	3.99828e-06	up	Ensembl	537	chr5:37316216-37318491-	exon sense-overlapping	ENSMUST00000031005	Evc	chr5:37299171-37336894-
chr12	80112682	80113000	diffreps_peak_00030277	10.3732	318	ENSMUST00000181323	Gm26669	2.87425	4.23487e-11	1.32518e-08	up	Ensembl	1808	chr12:80108034-80113000+	natural antisense	ENSMUST00000021552	Zfp36l1	chr12:80107760-80113013-
chr4	155840901	155841280	diffreps_peak_00099481	7.69255	379	ENSMUST00000133592	Mxra8	13.4615	2.02981e-08	1.09369e-06	up	Ensembl	564	chr4:155839830-155841280+	exon sense-overlapping	ENSMUST00000141883	Mxra8	chr4:155839680-155842130+
chr7	128274681	128275080	diffreps_peak_00127663	5.14565	399	ENSMUST00000154003	BC017158	3.57386	7.15067e-06	0.000113892	up	Ensembl	3302	chr7:128272107-128298109-	natural antisense	NM_133254	Slc5a2	chr7:128265697-128272433+
chr1	9574901	9575649	diffreps_peak_00000172	5.79863	748	ENSMUST00000121942	Gm6161	6.22232	1.58991e-06	3.21044e-05	up	Ensembl	1102	chr1:9574548-9575649+	intron sense-overlapping	ENSMUST00000144177	Adhfe1	chr1:9547948-9577970+
chr16	14170337	14170680	diffreps_peak_00051235	6.75701	343	ENSMUST00000133249	Nde1	2.51409	1.74981e-07	5.35475e-06	up	Ensembl	681	chr16:14163304-14170829+	exon sense-overlapping	ENSMUST00000117958	Nde1	chr16:14163287-14192828+
chr19	55742861	55743197	diffreps_peak_00070609	7.68884	336	ENSMUST00000133008	Tcf7l2	4.89606	2.04718e-08	1.09817e-06	up	Ensembl	691	chr19:55742845-55910681+	exon sense-overlapping	ENSMUST00000111658	Tcf7l2	chr19:55741884-55932715+
chr8	45736921	45737380	diffreps_peak_00131274	5.2886	459	ENSMUST00000136119	Sorbs2	4.4209	5.1452e-06	8.61843e-05	up	Ensembl	6425	chr8:45658784-45742419+	exon sense-overlapping	ENSMUST00000132139	Sorbs2	chr8:45658804-45827905+
chr11	54337401	54338100	diffreps_peak_00019358	8.14014	699	ENSMUST00000127731	Acsl6	4.45482	7.24203e-09	5.55377e-07	up	Ensembl	4358	chr11:54335497-54361539+	exon sense-overlapping	ENSMUST00000108899	Acsl6	chr11:54314988-54339287+
chr19	38735861	38736180	diffreps_peak_00069398	5.33731	319	ENSMUST00000183131	Plce1	15.7368	4.59923e-06	7.83085e-05	up	Ensembl	4220	chr19:38734914-38751123+	exon sense-overlapping	ENSMUST00000169713	Plce1	chr19:38524197-38785030+
chr2	173021912	173022540	diffreps_peak_00081627	5.81722	628	ENSMUST00000155512	Rbm38	2.59895	1.52327e-06	3.09699e-05	up	Ensembl	2281	chr2:173021913-173034728+	exon sense-overlapping	ENSMUST00000173393	Rbm38	chr2:173020498-173034734+
chr6	34685962	34686340	diffreps_peak_00111770	10.2342	378	ENSMUST00000155714	Cald1	4.76261	5.83243e-11	1.65538e-08	up	Ensembl	1422	chr6:34598544-34687173+	exon sense-overlapping	ENSMUST00000079391	Cald1	chr6:34598500-34775454+
chr6	34685962	34686340	diffreps_peak_00111770	10.2342	378	ENSMUST00000155714	Cald1	4.76261	5.83243e-11	1.65538e-08	up	Ensembl	1422	chr6:34598544-34687173+	exon sense-overlapping	ENSMUST00000142512	Cald1	chr6:34598512-34753588+
chr7	119783121	119783500	diffreps_peak_00126714	5.76717	379	ENSMUST00000125595	Eri2	9.95455	1.70935e-06	3.4141e-05	up	Ensembl	6025	chr7:119782573-119793975-	natural antisense	ENSMUST00000063770	Acsm3	chr7:119760924-119784891+
chr11	55409641	55409997	diffreps_peak_00019495	5.8086	356	ENSMUST00000125787	Sparc	2.21893	1.55383e-06	3.14495e-05	up	Ensembl	907	chr11:55409204-55419900-	exon sense-overlapping	ENSMUST00000018737	Sparc	chr11:55394500-55420080-
chr7	4752141	4752528	diffreps_peak_00118384	7.2937	387	ENSMUST00000182272	Cox6b2	3.94714	5.08514e-08	2.10929e-06	up	Ensembl	519	chr7:4751925-4752528-	exon sense-overlapping	NM_183405	Cox6b2	chr7:4751792-4753094-
chr4	133190128	133190500	diffreps_peak_00096619	8.48458	372	ENSMUST00000136637	Wasf2	3.07318	3.2766e-09	3.2038e-07	up	Ensembl	599	chr4:133189018-133190549+	exon sense-overlapping	ENSMUST00000105912	Wasf2	chr4:133176371-133196504+
chr4	109403121	109403993	diffreps_peak_00094182	9.89442	872	NR_131195	Gm12750	2.48404	1.27522e-10	2.93836e-08	up	RefSeq	2532	chr4:109402279-109406257-	bidirectional	ENSMUST00000106619	Ttc39a	chr4:109407110-109424238+
chr19	55742861	55743197	diffreps_peak_00070609	7.68884	336	ENSMUST00000133008	Tcf7l2	4.89606	2.04718e-08	1.09817e-06	up	Ensembl	691	chr19:55742845-55910681+	exon sense-overlapping	ENSMUST00000111652	Tcf7l2	chr19:55742242-55912723+
chr5	24429181	24429578	diffreps_peak_00100701	7.541	397	ENSMUST00000155636	Slc4a2	2.79997	2.87737e-08	1.39605e-06	up	Ensembl	637	chr5:24429018-24429779+	exon sense-overlapping	ENSMUST00000141966	Slc4a2	chr5:24423859-24429882+
chr5	37318162	37318491	diffreps_peak_00102204	6.91801	329	ENSMUST00000124426	Evc	2.47912	1.20779e-07	3.99828e-06	up	Ensembl	537	chr5:37316216-37318491-	exon sense-overlapping	ENSMUST00000114154	Evc	chr5:37289098-37333566-
chr10	128249520	128249860	diffreps_peak_00016439	6.50906	340	ENSMUST00000136854	Timeless	3.72414	3.097e-07	8.40176e-06	up	Ensembl	560	chr10:128249213-128249860+	exon sense-overlapping	ENSMUST00000055539	Timeless	chr10:128232065-128252941+
chr7	4752141	4752528	diffreps_peak_00118384	7.2937	387	ENSMUST00000182272	Cox6b2	3.94714	5.08514e-08	2.10929e-06	up	Ensembl	519	chr7:4751925-4752528-	exon sense-overlapping	NM_183406	Cox6b2	chr7:4751792-4752902-
chr7	127979181	127979620	diffreps_peak_00127631	7.95361	439	uc009jxs.1	AK134717	2.37481	1.11273e-08	7.34634e-07	up	UCSC_knowngene	1514	chr7:127978141-127979654+	intron sense-overlapping	ENSMUST00000121616	Fus	chr7:127967508-127982032+
chr11	90657501	90657840	diffreps_peak_00023161	6.71736	339	ENSMUST00000147329	Tom1l1	3.80105	1.91706e-07	5.77043e-06	up	Ensembl	2694	chr11:90657072-90663312-	exon sense-overlapping	ENSMUST00000020849	Tom1l1	chr11:90643465-90687607-
chr16	14170337	14170680	diffreps_peak_00051235	6.75701	343	ENSMUST00000133249	Nde1	2.51409	1.74981e-07	5.35475e-06	up	Ensembl	681	chr16:14163304-14170829+	exon sense-overlapping	ENSMUST00000023359	Nde1	chr16:14163275-14192928+
chr7	119783121	119783500	diffreps_peak_00126714	5.76717	379	ENSMUST00000125595	Eri2	9.95455	1.70935e-06	3.4141e-05	up	Ensembl	6025	chr7:119782573-119793975-	exon sense-overlapping	ENSMUST00000106523	Eri2	chr7:119768679-119793967-
chr2	91260961	91261406	diffreps_peak_00076025	9.49127	445	ENSMUST00000126754	Pacsin3	2.13311	3.2265e-10	5.93246e-08	up	Ensembl	761	chr2:91260805-91261669+	exon sense-overlapping	ENSMUST00000059566	Pacsin3	chr2:91256162-91264679+
chr10	80342361	80342740	diffreps_peak_00013301	5.52767	379	NR_104339	Adamtsl5	5.45	2.96706e-06	5.41528e-05	up	RefSeq	3559	chr10:80339793-80348448-	exon sense-overlapping	ENSMUST00000138705	Adamtsl5	chr10:80343006-80345238-
chr19	3897481	3897831	diffreps_peak_00067041	5.75645	350	ENSMUST00000134698	Tcirg1	3.99542	1.75205e-06	3.48639e-05	up	Ensembl	463	chr19:3897071-3897831-	exon sense-overlapping	NM_001136091	Tcirg1	chr19:3896050-3907133-
chr10	128249520	128249860	diffreps_peak_00016439	6.50906	340	ENSMUST00000136854	Timeless	3.72414	3.097e-07	8.40176e-06	up	Ensembl	560	chr10:128249213-128249860+	exon sense-overlapping	NM_001136082	Timeless	chr10:128232063-128252941+
chr10	24595321	24595801	diffreps_peak_00010204	10.5975	480	ENSMUST00000125158	Gm15270	3.7294	2.52612e-11	9.21255e-09	up	Ensembl	870	chr10:24595249-24597108-	natural antisense	ENSMUST00000129142	Ctgf	chr10:24595780-24596370+
chrX	74022632	74023197	diffreps_peak_00146930	10.9874	565	ENSMUST00000146210	Irak1	2.44874	1.0294e-11	5.19657e-09	up	Ensembl	576	chrX:74022633-74023376-	exon sense-overlapping	ENSMUST00000124580	Irak1	chrX:74022187-74023173-
chr3	75878645	75879000	diffreps_peak_00084852	9.04354	355	ENSMUST00000134219	Golim4	2.53285	9.04598e-10	1.3021e-07	up	Ensembl	2062	chr3:75876479-75879008-	exon sense-overlapping	ENSMUST00000167078	Golim4	chr3:75877659-75956937-
chrX	74022632	74023197	diffreps_peak_00146930	10.9874	565	ENSMUST00000146210	Irak1	2.44874	1.0294e-11	5.19657e-09	up	Ensembl	576	chrX:74022633-74023376-	exon sense-overlapping	NM_001177975	Irak1	chrX:74013914-74023918-
chr15	98209181	98209520	diffreps_peak_00049243	9.49597	339	uc007xmc.2	Olfr287	11.6623	3.19173e-10	5.88489e-08	up	UCSC_knowngene	1050	chr15:98208940-98221056-	exon sense-overlapping	ENSMUST00000141911	Olfr287	chr15:98207747-98221056-
chr9	85843441	85843780	diffreps_peak_00142775	8.74545	339	uc009qwy.1	AK162386	2.36918	1.79703e-09	2.1752e-07	up	UCSC_knowngene	2334	chr9:85820241-85844131-	natural antisense	ENSMUST00000006559	Tpbg	chr9:85842380-85847055+
chr8	25675441	25675742	diffreps_peak_00130588	7.07686	301	uc009lgo.1	Whsc1l1	3.65759	8.37791e-08	3.04583e-06	up	UCSC_knowngene	2577	chr8:25674436-25677972+	exon sense-overlapping	NM_001001735	Whsc1l1	chr8:25602306-25677972+
chr8	45736921	45737380	diffreps_peak_00131274	5.2886	459	ENSMUST00000136119	Sorbs2	4.4209	5.1452e-06	8.61843e-05	up	Ensembl	6425	chr8:45658784-45742419+	exon sense-overlapping	ENSMUST00000138049	Sorbs2	chr8:45507798-45795412+
chr19	6126701	6127060	diffreps_peak_00067535	5.92042	359	uc008ghn.1	AK045837	7.62025	1.20111e-06	2.53363e-05	up	UCSC_knowngene	3077	chr19:6125103-6128179-	exon sense-overlapping	ENSMUST00000154601	Snx15	chr19:6119852-6128147-
chr2	91260961	91261406	diffreps_peak_00076025	9.49127	445	ENSMUST00000126754	Pacsin3	2.13311	3.2265e-10	5.93246e-08	up	Ensembl	761	chr2:91260805-91261669+	exon sense-overlapping	ENSMUST00000156919	Pacsin3	chr2:91256838-91261335+
chr3	95009081	95009600	diffreps_peak_00086203	5.14961	519	ENSMUST00000146169	Zfp687	2.5677	7.08578e-06	0.000113067	up	Ensembl	4930	chr3:95006590-95011807-	natural antisense	ENSMUST00000072287	Pi4kb	chr3:94974731-95006843+
chr7	127979181	127979620	diffreps_peak_00127631	7.95361	439	uc009jxs.1	AK134717	2.37481	1.11273e-08	7.34634e-07	up	UCSC_knowngene	1514	chr7:127978141-127979654+	exon sense-overlapping	ENSMUST00000174632	Fus	chr7:127977314-127981449+
chr4	155840901	155841280	diffreps_peak_00099481	7.69255	379	ENSMUST00000133592	Mxra8	13.4615	2.02981e-08	1.09369e-06	up	Ensembl	564	chr4:155839830-155841280+	exon sense-overlapping	NM_024263	Mxra8	chr4:155839680-155844102+
chr1	121494821	121495200	diffreps_peak_00004947	6.37864	379	ENSMUST00000152959	Ccdc93	9.99213	4.18179e-07	1.06678e-05	up	Ensembl	3040	chr1:121491217-121499477+	exon sense-overlapping	ENSMUST00000036025	Ccdc93	chr1:121431049-121506460+
chr9	107558861	107559200	diffreps_peak_00143980	6.37971	339	ENSMUST00000129320	Rassf1	13.475	4.17145e-07	1.06496e-05	up	Ensembl	2375	chr9:107557942-107560435+	exon sense-overlapping	NM_001243748	Rassf1	chr9:107551555-107562267+
chr1	156063321	156063694	diffreps_peak_00006685	11.0204	373	ENSMUST00000125371	Tor1aip2	4.28531	9.54107e-12	5.0076e-09	up	Ensembl	624	chr1:156063213-156064842+	exon sense-overlapping	ENSMUST00000060404	Tor1aip2	chr1:156040890-156068861+
chr7	29331103	29331420	diffreps_peak_00120585	8.44003	317	ENSMUST00000183164	Sipa1l3	4.11946	3.63057e-09	3.44135e-07	up	Ensembl	712	chr7:29331104-29339063-	exon sense-overlapping	ENSMUST00000183330	Sipa1l3	chr7:29320372-29377605-
chr10	80342361	80342740	diffreps_peak_00013301	5.52767	379	NR_104339	Adamtsl5	5.45	2.96706e-06	5.41528e-05	up	RefSeq	3559	chr10:80339793-80348448-	exon sense-overlapping	ENSMUST00000105352	Adamtsl5	chr10:80342739-80348412-
chr7	119783121	119783500	diffreps_peak_00126714	5.76717	379	ENSMUST00000125595	Eri2	9.95455	1.70935e-06	3.4141e-05	up	Ensembl	6025	chr7:119782573-119793975-	natural antisense	NM_212441	Acsm3	chr7:119760923-119784889+
chr15	98209181	98209520	diffreps_peak_00049243	9.49597	339	uc007xmc.2	Olfr287	11.6623	3.19173e-10	5.88489e-08	up	UCSC_knowngene	1050	chr15:98208940-98221056-	exon sense-overlapping	NM_001011780	Olfr287	chr15:98206971-98221056-
chr7	4752141	4752528	diffreps_peak_00118384	7.2937	387	ENSMUST00000182272	Cox6b2	3.94714	5.08514e-08	2.10929e-06	up	Ensembl	519	chr7:4751925-4752528-	exon sense-overlapping	ENSMUST00000182173	Cox6b2	chr7:4751947-4753002-
chr4	43518401	43518920	diffreps_peak_00091098	7.63917	519	ENSMUST00000150262	Tpm2	4.40447	2.29527e-08	1.1871e-06	up	Ensembl	1545	chr4:43514711-43523438-	exon sense-overlapping	ENSMUST00000150592	Tpm2	chr4:43519668-43523765-
chr7	78899370	78899699	diffreps_peak_00123697	6.51568	329	ENSMUST00000172017	Aen	2.68698	3.05013e-07	8.29956e-06	up	Ensembl	393	chr7:78895951-78899699+	exon sense-overlapping	ENSMUST00000107421	Aen	chr7:78895934-78908374+
chr9	77957421	77957732	diffreps_peak_00142570	7.83033	311	ENSMUST00000148398	Elovl5	11.4724	1.47798e-08	8.82635e-07	up	Ensembl	685	chr9:77917434-77957732+	exon sense-overlapping	NM_134255	Elovl5	chr9:77917365-77984519+
chr8	105330021	105330340	diffreps_peak_00134862	7.56888	319	ENSMUST00000132777	Fhod1	4.86755	2.69851e-08	1.33165e-06	up	Ensembl	4304	chr8:105329163-105347909-	exon sense-overlapping	NM_177699	Fhod1	chr8:105329160-105347970-
chr2	173021912	173022540	diffreps_peak_00081627	5.81722	628	ENSMUST00000155512	Rbm38	2.59895	1.52327e-06	3.09699e-05	up	Ensembl	2281	chr2:173021913-173034728+	exon sense-overlapping	ENSMUST00000173997	Rbm38	chr2:173022438-173033709+
chr11	90657501	90657840	diffreps_peak_00023161	6.71736	339	ENSMUST00000147329	Tom1l1	3.80105	1.91706e-07	5.77043e-06	up	Ensembl	2694	chr11:90657072-90663312-	exon sense-overlapping	ENSMUST00000107869	Tom1l1	chr11:90645691-90687579-
chr7	128275301	128275680	diffreps_peak_00127664	6.61919	379	ENSMUST00000154003	BC017158	6.33962	2.4033e-07	6.87272e-06	up	Ensembl	3302	chr7:128272107-128298109-	exon sense-overlapping	ENSMUST00000033044	BC017158	chr7:128271379-128298170-
chr8	45736921	45737380	diffreps_peak_00131274	5.2886	459	ENSMUST00000136119	Sorbs2	4.4209	5.1452e-06	8.61843e-05	up	Ensembl	6425	chr8:45658784-45742419+	exon sense-overlapping	ENSMUST00000130011	Sorbs2	chr8:45661996-45827592+
chr7	28370441	28370920	diffreps_peak_00120362	10.7587	479	uc009fyr.1	Plekhg2	4.07262	1.74317e-11	7.26333e-09	up	UCSC_knowngene	1954	chr7:28368679-28372662-	exon sense-overlapping	NM_001290542	Plekhg2	chr7:28359604-28372662-
chr8	72138341	72138737	diffreps_peak_00132807	7.67374	396	ENSMUST00000181918	Gm26586	2.96195	2.11962e-08	1.12527e-06	up	Ensembl	1745	chr8:72137389-72140820-	natural antisense	NM_001001491	Tpm4	chr8:72135292-72153129+
chr16	35662470	35662898	diffreps_peak_00052842	6.5815	428	ENSMUST00000128966	Sema5b	2.9541	2.62117e-07	7.36676e-06	up	Ensembl	766	chr16:35662471-35663454+	exon sense-overlapping	ENSMUST00000128347	Sema5b	chr16:35661305-35663314+
chr1	126528421	126528755	diffreps_peak_00005170	7.67459	334	ENSMUST00000162647	Nckap5	3.73323	2.11551e-08	1.12369e-06	up	Ensembl	1510	chr1:126527540-126830481-	exon sense-overlapping	ENSMUST00000094609	Nckap5	chr1:125913637-126830632-
chr2	105692736	105693040	diffreps_peak_00076802	11.2961	304	ENSMUST00000147946	Pax6	2.78019	5.05698e-12	3.45953e-09	up	Ensembl	527	chr2:105692483-105693125+	exon sense-overlapping	NM_001244198	Pax6	chr2:105668896-105697364+
chr11	75569561	75569940	diffreps_peak_00021579	6.31749	379	uc007kef.1	Slc43a2	62.6	4.814e-07	1.19415e-05	up	UCSC_knowngene	2292	chr11:75566007-75570189+	exon sense-overlapping	ENSMUST00000108433	Slc43a2	chr11:75531698-75573883+
chr11	54337401	54338100	diffreps_peak_00019358	8.14014	699	ENSMUST00000127731	Acsl6	4.45482	7.24203e-09	5.55377e-07	up	Ensembl	4358	chr11:54335497-54361539+	exon sense-overlapping	ENSMUST00000108905	Acsl6	chr11:54304202-54364752+
chr4	43631538	43631851	diffreps_peak_00091128	7.72356	313	ENSMUST00000137535	Gm12473	3.47411	1.8899e-08	1.04122e-06	up	Ensembl	579	chr4:43631539-43641533-	natural antisense	ENSMUST00000030191	Npr2	chr4:43631935-43651244+
chr4	109403121	109403993	diffreps_peak_00094182	9.89442	872	NR_131195	Gm12750	2.48404	1.27522e-10	2.93836e-08	up	RefSeq	2532	chr4:109402279-109406257-	bidirectional	ENSMUST00000124209	Ttc39a	chr4:109406623-109428134+
chr11	116679906	116680420	diffreps_peak_00026060	9.00958	514	ENSMUST00000144398	St6galnac2	3.00443	9.78191e-10	1.38027e-07	up	Ensembl	1683	chr11:116677483-116681290-	exon sense-overlapping	ENSMUST00000079545	St6galnac2	chr11:116675303-116694868-
chr6	34662127	34662460	diffreps_peak_00111769	8.20086	333	ENSMUST00000127055	Cald1	4.8655	6.29711e-09	5.0334e-07	up	Ensembl	667	chr6:34598620-34662748+	exon sense-overlapping	ENSMUST00000142512	Cald1	chr6:34598512-34753588+
chr3	87971077	87971988	diffreps_peak_00085406	8.27687	911	ENSMUST00000159830	Nes	3.18151	5.28608e-09	4.47214e-07	up	Ensembl	1311	chr3:87971078-87973391+	exon sense-overlapping	ENSMUST00000090973	Nes	chr3:87971093-87980451+
chr7	4752141	4752528	diffreps_peak_00118384	7.2937	387	ENSMUST00000182272	Cox6b2	3.94714	5.08514e-08	2.10929e-06	up	Ensembl	519	chr7:4751925-4752528-	exon sense-overlapping	ENSMUST00000183971	Cox6b2	chr7:4751792-4752972-
chr8	45736921	45737380	diffreps_peak_00131274	5.2886	459	ENSMUST00000136119	Sorbs2	4.4209	5.1452e-06	8.61843e-05	up	Ensembl	6425	chr8:45658784-45742419+	exon sense-overlapping	ENSMUST00000153798	Sorbs2	chr8:45658292-45821141+
chrX	74022632	74023197	diffreps_peak_00146930	10.9874	565	ENSMUST00000146210	Irak1	2.44874	1.0294e-11	5.19657e-09	up	Ensembl	576	chrX:74022633-74023376-	exon sense-overlapping	NM_001177974	Irak1	chrX:74013914-74023921-
chr7	4752141	4752528	diffreps_peak_00118384	7.2937	387	ENSMUST00000182272	Cox6b2	3.94714	5.08514e-08	2.10929e-06	up	Ensembl	519	chr7:4751925-4752528-	exon sense-overlapping	ENSMUST00000063324	Cox6b2	chr7:4751792-4753094-
chr1	45389801	45390240	diffreps_peak_00001855	13.0855	439	ENSMUST00000150143	Col5a2	8.59029	8.21377e-14	8.98318e-10	up	Ensembl	2951	chr1:45389031-45393634-	exon sense-overlapping	NM_007737	Col5a2	chr1:45374331-45503282-
chr2	119812059	119812420	diffreps_peak_00077406	5.79975	361	ENSMUST00000147761	Tyro3	3.57246	1.5858e-06	3.20312e-05	up	Ensembl	3529	chr2:119809208-119818091+	exon sense-overlapping	ENSMUST00000110783	Tyro3	chr2:119797733-119818104+
chr7	28370441	28370920	diffreps_peak_00120362	10.7587	479	uc009fyr.1	Plekhg2	4.07262	1.74317e-11	7.26333e-09	up	UCSC_knowngene	1954	chr7:28368679-28372662-	exon sense-overlapping	NM_138752	Plekhg2	chr7:28359604-28372662-
chr9	107558861	107559200	diffreps_peak_00143980	6.37971	339	ENSMUST00000129320	Rassf1	13.475	4.17145e-07	1.06496e-05	up	Ensembl	2375	chr9:107557942-107560435+	exon sense-overlapping	ENSMUST00000093786	Rassf1	chr9:107551555-107562263+
chr19	38735861	38736180	diffreps_peak_00069398	5.33731	319	ENSMUST00000183131	Plce1	15.7368	4.59923e-06	7.83085e-05	up	Ensembl	4220	chr19:38734914-38751123+	exon sense-overlapping	NM_019588	Plce1	chr19:38524197-38785100+
chr19	55742861	55743197	diffreps_peak_00070609	7.68884	336	ENSMUST00000133008	Tcf7l2	4.89606	2.04718e-08	1.09817e-06	up	Ensembl	691	chr19:55742845-55910681+	exon sense-overlapping	ENSMUST00000061496	Tcf7l2	chr19:55741810-55933654+
chr8	71595281	71595600	diffreps_peak_00132735	7.18299	319	ENSMUST00000123240	Pgls	3.08501	6.56165e-08	2.53215e-06	up	Ensembl	2688	chr8:71592211-71595665+	exon sense-overlapping	ENSMUST00000034264	Pgls	chr8:71592176-71596269+
chrX	74022632	74023197	diffreps_peak_00146930	10.9874	565	ENSMUST00000146210	Irak1	2.44874	1.0294e-11	5.19657e-09	up	Ensembl	576	chrX:74022633-74023376-	exon sense-overlapping	ENSMUST00000124417	Irak1	chrX:74022229-74022944-
chr7	4752141	4752528	diffreps_peak_00118384	7.2937	387	ENSMUST00000182272	Cox6b2	3.94714	5.08514e-08	2.10929e-06	up	Ensembl	519	chr7:4751925-4752528-	exon sense-overlapping	NM_001289850	Cox6b2	chr7:4751792-4753094-
chr8	71595281	71595600	diffreps_peak_00132735	7.18299	319	ENSMUST00000123240	Pgls	3.08501	6.56165e-08	2.53215e-06	up	Ensembl	2688	chr8:71592211-71595665+	exon sense-overlapping	NM_025396	Pgls	chr8:71592184-71596267+
chr9	109094601	109095060	diffreps_peak_00144346	5.9026	459	ENSMUST00000134690	Gm7628	3.66034	1.25142e-06	2.62415e-05	up	Ensembl	2010	chr9:109093844-109097796-	natural antisense	NM_172775	Plxnb1	chr9:109095436-109119915+
chr7	119783121	119783500	diffreps_peak_00126714	5.76717	379	ENSMUST00000125595	Eri2	9.95455	1.70935e-06	3.4141e-05	up	Ensembl	6025	chr7:119782573-119793975-	exon sense-overlapping	NM_027698	Eri2	chr7:119783826-119794058-
chr8	45736921	45737380	diffreps_peak_00131274	5.2886	459	ENSMUST00000136119	Sorbs2	4.4209	5.1452e-06	8.61843e-05	up	Ensembl	6425	chr8:45658784-45742419+	exon sense-overlapping	ENSMUST00000139869	Sorbs2	chr8:45658676-45827903+
chr19	3897481	3897831	diffreps_peak_00067041	5.75645	350	ENSMUST00000134698	Tcirg1	3.99542	1.75205e-06	3.48639e-05	up	Ensembl	463	chr19:3897071-3897831-	exon sense-overlapping	ENSMUST00000145791	Tcirg1	chr19:3896050-3905230-
chr8	45736921	45737380	diffreps_peak_00131274	5.2886	459	ENSMUST00000136119	Sorbs2	4.4209	5.1452e-06	8.61843e-05	up	Ensembl	6425	chr8:45658784-45742419+	exon sense-overlapping	ENSMUST00000139103	Sorbs2	chr8:45688337-45759101+
chr7	78899370	78899699	diffreps_peak_00123697	6.51568	329	ENSMUST00000172017	Aen	2.68698	3.05013e-07	8.29956e-06	up	Ensembl	393	chr7:78895951-78899699+	exon sense-overlapping	ENSMUST00000107425	Aen	chr7:78895927-78909140+
chr9	85843441	85843780	diffreps_peak_00142775	8.74545	339	uc009qwy.1	AK162386	2.36918	1.79703e-09	2.1752e-07	up	UCSC_knowngene	2334	chr9:85820241-85844131-	exon sense-overlapping	ENSMUST00000069896	9330154J02Rik	chr9:85820241-85843285-
chr2	91260961	91261406	diffreps_peak_00076025	9.49127	445	ENSMUST00000126754	Pacsin3	2.13311	3.2265e-10	5.93246e-08	up	Ensembl	761	chr2:91260805-91261669+	exon sense-overlapping	ENSMUST00000111349	Pacsin3	chr2:91257329-91264679+
chr19	55742861	55743197	diffreps_peak_00070609	7.68884	336	ENSMUST00000133008	Tcf7l2	4.89606	2.04718e-08	1.09817e-06	up	Ensembl	691	chr19:55742845-55910681+	exon sense-overlapping	NM_009333	Tcf7l2	chr19:55741810-55933655+
chr7	128274681	128275080	diffreps_peak_00127663	5.14565	399	ENSMUST00000154003	BC017158	3.57386	7.15067e-06	0.000113892	up	Ensembl	3302	chr7:128272107-128298109-	exon sense-overlapping	ENSMUST00000033044	BC017158	chr7:128271379-128298170-
chr19	4764601	4764940	diffreps_peak_00067203	5.04063	339	uc008gat.1	AK086315	6.47945	9.10682e-06	0.000140655	up	UCSC_knowngene	4320	chr19:4761609-4765928-	natural antisense	NM_025717	Rbm4b	chr19:4756525-4765941+
chr2	173021912	173022540	diffreps_peak_00081627	5.81722	628	ENSMUST00000155512	Rbm38	2.59895	1.52327e-06	3.09699e-05	up	Ensembl	2281	chr2:173021913-173034728+	exon sense-overlapping	NM_019547	Rbm38	chr2:173021902-173034731+
chr5	110386801	110387200	diffreps_peak_00105194	8.15513	399	ENSMUST00000180866	Gm26711	3.21036	6.99634e-09	5.42195e-07	up	Ensembl	1833	chr5:110385835-110388073+	natural antisense	ENSMUST00000056124	Fbrsl1	chr5:110361754-110387127-
chr3	95009081	95009600	diffreps_peak_00086203	5.14961	519	ENSMUST00000146169	Zfp687	2.5677	7.08578e-06	0.000113067	up	Ensembl	4930	chr3:95006590-95011807-	natural antisense	NM_001293716	Pi4kb	chr3:94974731-95006937+
chr2	91260961	91261406	diffreps_peak_00076025	9.49127	445	ENSMUST00000126754	Pacsin3	2.13311	3.2265e-10	5.93246e-08	up	Ensembl	761	chr2:91260805-91261669+	exon sense-overlapping	ENSMUST00000144394	Pacsin3	chr2:91256813-91261246+
chr11	54337401	54338100	diffreps_peak_00019358	8.14014	699	ENSMUST00000127731	Acsl6	4.45482	7.24203e-09	5.55377e-07	up	Ensembl	4358	chr11:54335497-54361539+	exon sense-overlapping	ENSMUST00000108904	Acsl6	chr11:54304202-54361539+
chr12	111795351	111795678	diffreps_peak_00032783	7.19695	327	ENSMUST00000141435	Klc1	2.95382	6.35405e-08	2.47127e-06	up	Ensembl	806	chr12:111795352-111806726+	exon sense-overlapping	NM_001025361	Klc1	chr12:111758868-111806775+
chr11	55409641	55409997	diffreps_peak_00019495	5.8086	356	ENSMUST00000125787	Sparc	2.21893	1.55383e-06	3.14495e-05	up	Ensembl	907	chr11:55409204-55419900-	exon sense-overlapping	ENSMUST00000108858	Sparc	chr11:55394500-55419898-
chr9	92542521	92542840	diffreps_peak_00143035	6.3511	319	NR_029474	B430319G15Rik	2.31124	4.45551e-07	1.12546e-05	up	RefSeq	4069	chr9:92538801-92542869-	natural antisense	ENSMUST00000160359	Plod2	chr9:92542264-92608420+
chr5	115544113	115544569	diffreps_peak_00106070	6.88775	456	ENSMUST00000134198	Pxn	2.75982	1.29493e-07	4.23162e-06	up	Ensembl	524	chr5:115544114-115544948+	exon sense-overlapping	NM_133915	Pxn	chr5:115506676-115555987+
chr8	71595281	71595600	diffreps_peak_00132735	7.18299	319	ENSMUST00000123240	Pgls	3.08501	6.56165e-08	2.53215e-06	up	Ensembl	2688	chr8:71592211-71595665+	exon sense-overlapping	NM_001294269	Pgls	chr8:71592184-71596267+
chr3	75878645	75879000	diffreps_peak_00084852	9.04354	355	ENSMUST00000134219	Golim4	2.53285	9.04598e-10	1.3021e-07	up	Ensembl	2062	chr3:75876479-75879008-	exon sense-overlapping	NM_001291069	Golim4	chr3:75876183-75956949-
chr2	105692736	105693040	diffreps_peak_00076802	11.2961	304	ENSMUST00000147946	Pax6	2.78019	5.05698e-12	3.45953e-09	up	Ensembl	527	chr2:105692483-105693125+	exon sense-overlapping	NM_001244201	Pax6	chr2:105668896-105697364+
chr8	45736921	45737380	diffreps_peak_00131274	5.2886	459	ENSMUST00000136119	Sorbs2	4.4209	5.1452e-06	8.61843e-05	up	Ensembl	6425	chr8:45658784-45742419+	exon sense-overlapping	ENSMUST00000141039	Sorbs2	chr8:45507818-45776882+
chr12	80112682	80113000	diffreps_peak_00030277	10.3732	318	ENSMUST00000181323	Gm26669	2.87425	4.23487e-11	1.32518e-08	up	Ensembl	1808	chr12:80108034-80113000+	natural antisense	NM_007564	Zfp36l1	chr12:80107760-80113013-
chr4	133190128	133190500	diffreps_peak_00096619	8.48458	372	ENSMUST00000136637	Wasf2	3.07318	3.2766e-09	3.2038e-07	up	Ensembl	599	chr4:133189018-133190549+	exon sense-overlapping	NM_153423	Wasf2	chr4:133130633-133198330+
chr19	55742861	55743197	diffreps_peak_00070609	7.68884	336	ENSMUST00000133008	Tcf7l2	4.89606	2.04718e-08	1.09817e-06	up	Ensembl	691	chr19:55742845-55910681+	exon sense-overlapping	ENSMUST00000111649	Tcf7l2	chr19:55742243-55912722+
chr5	24429181	24429578	diffreps_peak_00100701	7.541	397	ENSMUST00000155636	Slc4a2	2.79997	2.87737e-08	1.39605e-06	up	Ensembl	637	chr5:24429018-24429779+	exon sense-overlapping	ENSMUST00000115047	Slc4a2	chr5:24428423-24440947+
chr5	115544113	115544569	diffreps_peak_00106070	6.88775	456	ENSMUST00000134198	Pxn	2.75982	1.29493e-07	4.23162e-06	up	Ensembl	524	chr5:115544114-115544948+	exon sense-overlapping	ENSMUST00000086523	Pxn	chr5:115506808-115554978+
chr19	55742861	55743197	diffreps_peak_00070609	7.68884	336	ENSMUST00000133008	Tcf7l2	4.89606	2.04718e-08	1.09817e-06	up	Ensembl	691	chr19:55742845-55910681+	exon sense-overlapping	ENSMUST00000111657	Tcf7l2	chr19:55741810-55933654+
chr1	93776081	93776560	diffreps_peak_00004449	7.51352	479	ENSMUST00000135762	Atg4b	31.7273	3.06536e-08	1.46441e-06	up	Ensembl	4186	chr1:93755045-93788179+	exon sense-overlapping	NM_174874	Atg4b	chr1:93755033-93789529+
chr8	105330021	105330340	diffreps_peak_00134862	7.56888	319	ENSMUST00000132777	Fhod1	4.86755	2.69851e-08	1.33165e-06	up	Ensembl	4304	chr8:105329163-105347909-	exon sense-overlapping	ENSMUST00000014922	Fhod1	chr8:105329163-105347953-
chr8	14925049	14925420	diffreps_peak_00129934	7.21464	371	ENSMUST00000160619	Arhgef10	2.15055	6.10041e-08	2.39658e-06	up	Ensembl	3289	chr8:14911717-14928291+	exon sense-overlapping	ENSMUST00000161162	Arhgef10	chr8:14911724-14961202+
chr8	45736921	45737380	diffreps_peak_00131274	5.2886	459	ENSMUST00000136119	Sorbs2	4.4209	5.1452e-06	8.61843e-05	up	Ensembl	6425	chr8:45658784-45742419+	exon sense-overlapping	ENSMUST00000145458	Sorbs2	chr8:45627972-45745829+
chr8	105330021	105330340	diffreps_peak_00134862	7.56888	319	ENSMUST00000132777	Fhod1	4.86755	2.69851e-08	1.33165e-06	up	Ensembl	4304	chr8:105329163-105347909-	natural antisense	ENSMUST00000098453	Tmem208	chr8:105326395-105335219+
chr18	73863630	73864220	diffreps_peak_00065994	11.3138	590	ENSMUST00000139821	Mro	3.32929	4.85488e-12	3.42765e-09	up	Ensembl	1877	chr18:73863631-73870209+	exon sense-overlapping	ENSMUST00000179472	Mro	chr18:73859387-73879134+
chr4	109403121	109403993	diffreps_peak_00094182	9.89442	872	NR_131195	Gm12750	2.48404	1.27522e-10	2.93836e-08	up	RefSeq	2532	chr4:109402279-109406257-	bidirectional	uc008uci.2	Ttc39a	chr4:109407100-109424238+
chr4	133190128	133190500	diffreps_peak_00096619	8.48458	372	ENSMUST00000136637	Wasf2	3.07318	3.2766e-09	3.2038e-07	up	Ensembl	599	chr4:133189018-133190549+	exon sense-overlapping	ENSMUST00000084241	Wasf2	chr4:133130505-133199756+
chr16	14170337	14170680	diffreps_peak_00051235	6.75701	343	ENSMUST00000133249	Nde1	2.51409	1.74981e-07	5.35475e-06	up	Ensembl	681	chr16:14163304-14170829+	exon sense-overlapping	NM_001285504	Nde1	chr16:14163275-14192923+
chr12	111795351	111795678	diffreps_peak_00032783	7.19695	327	ENSMUST00000141435	Klc1	2.95382	6.35405e-08	2.47127e-06	up	Ensembl	806	chr12:111795352-111806726+	exon sense-overlapping	ENSMUST00000122300	Klc1	chr12:111759013-111806727+
chr19	55742861	55743197	diffreps_peak_00070609	7.68884	336	ENSMUST00000133008	Tcf7l2	4.89606	2.04718e-08	1.09817e-06	up	Ensembl	691	chr19:55742845-55910681+	exon sense-overlapping	ENSMUST00000041717	Tcf7l2	chr19:55741820-55933252+
chr3	75892782	75893082	diffreps_peak_00084858	10.6759	300	ENSMUST00000134444	Golim4	2.98571	2.10929e-11	8.25377e-09	up	Ensembl	563	chr3:75886771-75893082-	exon sense-overlapping	ENSMUST00000038563	Golim4	chr3:75876383-75956929-
chr7	78899370	78899699	diffreps_peak_00123697	6.51568	329	ENSMUST00000172017	Aen	2.68698	3.05013e-07	8.29956e-06	up	Ensembl	393	chr7:78895951-78899699+	intron sense-overlapping	ENSMUST00000138167	Aen	chr7:78898031-78902822+
chr7	128275301	128275680	diffreps_peak_00127664	6.61919	379	ENSMUST00000154003	BC017158	6.33962	2.4033e-07	6.87272e-06	up	Ensembl	3302	chr7:128272107-128298109-	natural antisense	NM_133254	Slc5a2	chr7:128265697-128272433+
chr11	54337401	54338100	diffreps_peak_00019358	8.14014	699	ENSMUST00000127731	Acsl6	4.45482	7.24203e-09	5.55377e-07	up	Ensembl	4358	chr11:54335497-54361539+	exon sense-overlapping	ENSMUST00000000145	Acsl6	chr11:54304005-54361535+
chr5	151072801	151073120	diffreps_peak_00110385	7.21479	319	ENSMUST00000146814	Stard13	4.53559	6.09825e-08	2.39627e-06	up	Ensembl	2480	chr5:151071264-151190150-	exon sense-overlapping	ENSMUST00000126770	Stard13	chr5:151073308-151233836-
chr6	72388281	72388660	diffreps_peak_00113519	7.59145	379	ENSMUST00000142613	Vamp8	3.70527	2.56181e-08	1.28319e-06	up	Ensembl	2076	chr6:72385228-72389911-	exon sense-overlapping	ENSMUST00000059983	Vamp8	chr6:72385223-72390703-
chr11	54337401	54338100	diffreps_peak_00019358	8.14014	699	ENSMUST00000127731	Acsl6	4.45482	7.24203e-09	5.55377e-07	up	Ensembl	4358	chr11:54335497-54361539+	exon sense-overlapping	NM_001033598	Acsl6	chr11:54303824-54361539+
chr3	75892782	75893082	diffreps_peak_00084858	10.6759	300	ENSMUST00000134444	Golim4	2.98571	2.10929e-11	8.25377e-09	up	Ensembl	563	chr3:75886771-75893082-	exon sense-overlapping	ENSMUST00000117242	Golim4	chr3:75876183-75956949-
chr3	75892782	75893082	diffreps_peak_00084858	10.6759	300	ENSMUST00000134444	Golim4	2.98571	2.10929e-11	8.25377e-09	up	Ensembl	563	chr3:75886771-75893082-	exon sense-overlapping	NM_175193	Golim4	chr3:75876183-75956949-
chr7	28370441	28370920	diffreps_peak_00120362	10.7587	479	uc009fyr.1	Plekhg2	4.07262	1.74317e-11	7.26333e-09	up	UCSC_knowngene	1954	chr7:28368679-28372662-	exon sense-overlapping	ENSMUST00000147362	Plekhg2	chr7:28368410-28371727-
chr12	111795351	111795678	diffreps_peak_00032783	7.19695	327	ENSMUST00000141435	Klc1	2.95382	6.35405e-08	2.47127e-06	up	Ensembl	806	chr12:111795352-111806726+	exon sense-overlapping	NM_001081959	Klc1	chr12:111758849-111806775+
chr2	105692736	105693040	diffreps_peak_00076802	11.2961	304	ENSMUST00000147946	Pax6	2.78019	5.05698e-12	3.45953e-09	up	Ensembl	527	chr2:105692483-105693125+	exon sense-overlapping	ENSMUST00000111082	Pax6	chr2:105676129-105697361+
chr1	121494821	121495200	diffreps_peak_00004947	6.37864	379	ENSMUST00000152959	Ccdc93	9.99213	4.18179e-07	1.06678e-05	up	Ensembl	3040	chr1:121491217-121499477+	exon sense-overlapping	NM_001025156	Ccdc93	chr1:121431067-121506460+
chr6	18846921	18847360	diffreps_peak_00110937	12.2981	439	ENSMUST00000180863	Gm26809	3.79792	5.0343e-13	1.05133e-09	up	Ensembl	2981	chr6:18844220-18847360+	intergenic	NA	NA	NA
chr10	24595321	24595801	diffreps_peak_00010204	10.5975	480	ENSMUST00000125158	Gm15270	3.7294	2.52612e-11	9.21255e-09	up	Ensembl	870	chr10:24595249-24597108-	natural antisense	ENSMUST00000176228	Ctgf	chr10:24595726-24598683+
chr8	14925049	14925420	diffreps_peak_00129934	7.21464	371	ENSMUST00000160619	Arhgef10	2.15055	6.10041e-08	2.39658e-06	up	Ensembl	3289	chr8:14911717-14928291+	exon sense-overlapping	NM_172751	Arhgef10	chr8:14911663-15001085+
chr9	109094601	109095060	diffreps_peak_00144346	5.9026	459	ENSMUST00000134690	Gm7628	3.66034	1.25142e-06	2.62415e-05	up	Ensembl	2010	chr9:109093844-109097796-	intronic antisense	ENSMUST00000131462	Plxnb1	chr9:109095952-109100498+
chr5	24429181	24429578	diffreps_peak_00100701	7.541	397	ENSMUST00000155636	Slc4a2	2.79997	2.87737e-08	1.39605e-06	up	Ensembl	637	chr5:24429018-24429779+	exon sense-overlapping	ENSMUST00000115049	Slc4a2	chr5:24428208-24440947+
chr5	115545371	115545805	diffreps_peak_00106071	5.58461	434	ENSMUST00000152156	Pxn	2.02322	2.60252e-06	4.84488e-05	up	Ensembl	3761	chr5:115506711-115555982+	exon sense-overlapping	NM_011223	Pxn	chr5:115506676-115555987+
chr1	9574901	9575649	diffreps_peak_00000172	5.79863	748	ENSMUST00000121942	Gm6161	6.22232	1.58991e-06	3.21044e-05	up	Ensembl	1102	chr1:9574548-9575649+	intron sense-overlapping	NM_175236	Adhfe1	chr1:9548046-9577968+
chr7	4752141	4752528	diffreps_peak_00118384	7.2937	387	ENSMUST00000182272	Cox6b2	3.94714	5.08514e-08	2.10929e-06	up	Ensembl	519	chr7:4751925-4752528-	exon sense-overlapping	ENSMUST00000182111	Cox6b2	chr7:4751792-4753023-
chr1	93776081	93776560	diffreps_peak_00004449	7.51352	479	ENSMUST00000135762	Atg4b	31.7273	3.06536e-08	1.46441e-06	up	Ensembl	4186	chr1:93755045-93788179+	exon sense-overlapping	ENSMUST00000149436	Atg4b	chr1:93751500-93775683+
chr19	55742861	55743197	diffreps_peak_00070609	7.68884	336	ENSMUST00000133008	Tcf7l2	4.89606	2.04718e-08	1.09817e-06	up	Ensembl	691	chr19:55742845-55910681+	exon sense-overlapping	ENSMUST00000111659	Tcf7l2	chr19:55742058-55932209+
chr7	128275301	128275680	diffreps_peak_00127664	6.61919	379	ENSMUST00000154003	BC017158	6.33962	2.4033e-07	6.87272e-06	up	Ensembl	3302	chr7:128272107-128298109-	natural antisense	ENSMUST00000118169	Slc5a2	chr7:128265676-128272430+
chr4	148144861	148145196	diffreps_peak_00098396	5.73334	335	ENSMUST00000105708	Mad2l2	2.47125	1.84781e-06	3.63608e-05	up	Ensembl	487	chr4:148144790-148145451+	exon sense-overlapping	ENSMUST00000132698	Mad2l2	chr4:148140182-148145121+
chr2	51960301	51960660	diffreps_peak_00074419	5.86748	359	ENSMUST00000123521	Nmi	2.94189	1.35683e-06	2.804e-05	up	Ensembl	487	chr2:51960236-51972970-	exon sense-overlapping	NM_001141949	Nmi	chr2:51948499-51973208-
chr1	164863120	164863460	diffreps_peak_00007287	8.05236	340	NR_040303	Gm20743	12.9329	8.86418e-09	6.36937e-07	up	RefSeq	1588	chr1:164863121-164871438+	intergenic	NA	NA	NA
chr11	54337401	54338100	diffreps_peak_00019358	8.14014	699	ENSMUST00000127731	Acsl6	4.45482	7.24203e-09	5.55377e-07	up	Ensembl	4358	chr11:54335497-54361539+	exon sense-overlapping	NM_001033599	Acsl6	chr11:54314903-54361539+
chr19	55742861	55743197	diffreps_peak_00070609	7.68884	336	ENSMUST00000133008	Tcf7l2	4.89606	2.04718e-08	1.09817e-06	up	Ensembl	691	chr19:55742845-55910681+	exon sense-overlapping	NM_001142924	Tcf7l2	chr19:55895321-55933655+
chr11	68990801	68991159	diffreps_peak_00020602	8.31891	358	ENSMUST00000173410	Pfas	3.7785	4.79832e-09	4.16293e-07	up	Ensembl	927	chr11:68990721-68991825-	exon sense-overlapping	ENSMUST00000152964	Pfas	chr11:68987963-68991349-
chr19	4764601	4764940	diffreps_peak_00067203	5.04063	339	uc008gat.1	AK086315	6.47945	9.10682e-06	0.000140655	up	UCSC_knowngene	4320	chr19:4761609-4765928-	natural antisense	ENSMUST00000036744	Rbm4b	chr19:4756571-4765940+
chr2	105692736	105693040	diffreps_peak_00076802	11.2961	304	ENSMUST00000147946	Pax6	2.78019	5.05698e-12	3.45953e-09	up	Ensembl	527	chr2:105692483-105693125+	exon sense-overlapping	ENSMUST00000167211	Pax6	chr2:105675513-105697361+
chr7	128274681	128275080	diffreps_peak_00127663	5.14565	399	ENSMUST00000154003	BC017158	3.57386	7.15067e-06	0.000113892	up	Ensembl	3302	chr7:128272107-128298109-	exon sense-overlapping	ENSMUST00000137677	BC017158	chr7:128287965-128290615-
chr16	14170337	14170680	diffreps_peak_00051235	6.75701	343	ENSMUST00000133249	Nde1	2.51409	1.74981e-07	5.35475e-06	up	Ensembl	681	chr16:14163304-14170829+	exon sense-overlapping	NM_023317	Nde1	chr16:14163275-14192923+
chr16	14170337	14170680	diffreps_peak_00051235	6.75701	343	ENSMUST00000133249	Nde1	2.51409	1.74981e-07	5.35475e-06	up	Ensembl	681	chr16:14163304-14170829+	exon sense-overlapping	NM_001285503	Nde1	chr16:14163275-14192923+
chr1	24614441	24614812	diffreps_peak_00000786	5.36256	371	uc007ams.1	Atpase6	6.05282	4.33951e-06	7.44872e-05	up	UCSC_knowngene	842	chr1:24613971-24614812-	intergenic	NA	NA	NA
chr5	151072801	151073120	diffreps_peak_00110385	7.21479	319	ENSMUST00000146814	Stard13	4.53559	6.09825e-08	2.39627e-06	up	Ensembl	2480	chr5:151071264-151190150-	exon sense-overlapping	NM_001163493	Stard13	chr5:151037515-151190193-
chr12	111795351	111795678	diffreps_peak_00032783	7.19695	327	ENSMUST00000141435	Klc1	2.95382	6.35405e-08	2.47127e-06	up	Ensembl	806	chr12:111795352-111806726+	exon sense-overlapping	ENSMUST00000134578	Klc1	chr12:111781947-111807844+
chr5	24429181	24429578	diffreps_peak_00100701	7.541	397	ENSMUST00000155636	Slc4a2	2.79997	2.87737e-08	1.39605e-06	up	Ensembl	637	chr5:24429018-24429779+	exon sense-overlapping	NM_001253892	Slc4a2	chr5:24427521-24440947+
chr13	51847351	51847700	diffreps_peak_00035434	6.99446	349	ENSMUST00000132480	Gadd45g	4.64045	1.01283e-07	3.49434e-06	up	Ensembl	863	chr13:51846744-51848224+	exon sense-overlapping	ENSMUST00000021903	Gadd45g	chr13:51846678-51848468+
chr5	115545371	115545805	diffreps_peak_00106071	5.58461	434	ENSMUST00000152156	Pxn	2.02322	2.60252e-06	4.84488e-05	up	Ensembl	3761	chr5:115506711-115555982+	exon sense-overlapping	ENSMUST00000067268	Pxn	chr5:115506676-115555987+
chr2	105692736	105693040	diffreps_peak_00076802	11.2961	304	ENSMUST00000147946	Pax6	2.78019	5.05698e-12	3.45953e-09	up	Ensembl	527	chr2:105692483-105693125+	exon sense-overlapping	ENSMUST00000111085	Pax6	chr2:105675433-105697344+
chr9	107558861	107559200	diffreps_peak_00143980	6.37971	339	ENSMUST00000129320	Rassf1	13.475	4.17145e-07	1.06496e-05	up	Ensembl	2375	chr9:107557942-107560435+	exon sense-overlapping	ENSMUST00000121635	Rassf1	chr9:107556611-107562263+
chr2	173021912	173022540	diffreps_peak_00081627	5.81722	628	ENSMUST00000155512	Rbm38	2.59895	1.52327e-06	3.09699e-05	up	Ensembl	2281	chr2:173021913-173034728+	exon sense-overlapping	ENSMUST00000029014	Rbm38	chr2:173021902-173034725+
chr7	28370441	28370920	diffreps_peak_00120362	10.7587	479	uc009fyr.1	Plekhg2	4.07262	1.74317e-11	7.26333e-09	up	UCSC_knowngene	1954	chr7:28368679-28372662-	exon sense-overlapping	ENSMUST00000144700	Plekhg2	chr7:28361092-28372599-
chr3	145652021	145652472	diffreps_peak_00088691	11.427	451	uc012czd.2	FJ422280	6.31948	3.74153e-12	2.88829e-09	up	UCSC_knowngene	1699	chr3:145650312-145652472+	bidirectional	ENSMUST00000029846	Cyr61	chr3:145646971-145649985-
chr19	3897481	3897831	diffreps_peak_00067041	5.75645	350	ENSMUST00000134698	Tcirg1	3.99542	1.75205e-06	3.48639e-05	up	Ensembl	463	chr19:3897071-3897831-	exon sense-overlapping	ENSMUST00000001801	Tcirg1	chr19:3896050-3907133-
chr16	35662470	35662898	diffreps_peak_00052842	6.5815	428	ENSMUST00000128966	Sema5b	2.9541	2.62117e-07	7.36676e-06	up	Ensembl	766	chr16:35662471-35663454+	exon sense-overlapping	ENSMUST00000050625	Sema5b	chr16:35541571-35664261+
chr12	80112682	80113000	diffreps_peak_00030277	10.3732	318	ENSMUST00000181323	Gm26669	2.87425	4.23487e-11	1.32518e-08	up	Ensembl	1808	chr12:80108034-80113000+	natural antisense	ENSMUST00000165114	Zfp36l1	chr12:80108698-80112998-
chr7	28370441	28370920	diffreps_peak_00120362	10.7587	479	uc009fyr.1	Plekhg2	4.07262	1.74317e-11	7.26333e-09	up	UCSC_knowngene	1954	chr7:28368679-28372662-	exon sense-overlapping	ENSMUST00000147887	Plekhg2	chr7:28370416-28371508-
chr2	91260961	91261406	diffreps_peak_00076025	9.49127	445	ENSMUST00000126754	Pacsin3	2.13311	3.2265e-10	5.93246e-08	up	Ensembl	761	chr2:91260805-91261669+	exon sense-overlapping	NM_001289677	Pacsin3	chr2:91256165-91264680+
chr11	54337401	54338100	diffreps_peak_00019358	8.14014	699	ENSMUST00000127731	Acsl6	4.45482	7.24203e-09	5.55377e-07	up	Ensembl	4358	chr11:54335497-54361539+	exon sense-overlapping	NM_144823	Acsl6	chr11:54304204-54361539+
chr4	109403121	109403993	diffreps_peak_00094182	9.89442	872	NR_131195	Gm12750	2.48404	1.27522e-10	2.93836e-08	up	RefSeq	2532	chr4:109402279-109406257-	bidirectional	NM_153392	Ttc39a	chr4:109407100-109444745+
chr10	24595321	24595801	diffreps_peak_00010204	10.5975	480	ENSMUST00000125158	Gm15270	3.7294	2.52612e-11	9.21255e-09	up	Ensembl	870	chr10:24595249-24597108-	natural antisense	ENSMUST00000020171	Ctgf	chr10:24595442-24598678+
chr19	55742861	55743197	diffreps_peak_00070609	7.68884	336	ENSMUST00000133008	Tcf7l2	4.89606	2.04718e-08	1.09817e-06	up	Ensembl	691	chr19:55742845-55910681+	exon sense-overlapping	NM_001142919	Tcf7l2	chr19:55741810-55933655+
chr19	55742861	55743197	diffreps_peak_00070609	7.68884	336	ENSMUST00000133008	Tcf7l2	4.89606	2.04718e-08	1.09817e-06	up	Ensembl	691	chr19:55742845-55910681+	exon sense-overlapping	ENSMUST00000111646	Tcf7l2	chr19:55895510-55933229+
chr11	75569561	75569940	diffreps_peak_00021579	6.31749	379	uc007kef.1	Slc43a2	62.6	4.814e-07	1.19415e-05	up	UCSC_knowngene	2292	chr11:75566007-75570189+	exon sense-overlapping	ENSMUST00000042561	Slc43a2	chr11:75531698-75577575+
chr11	54337401	54338100	diffreps_peak_00019358	8.14014	699	ENSMUST00000127731	Acsl6	4.45482	7.24203e-09	5.55377e-07	up	Ensembl	4358	chr11:54335497-54361539+	exon sense-overlapping	NM_001033597	Acsl6	chr11:54304204-54361539+
chr7	28370441	28370920	diffreps_peak_00120362	10.7587	479	uc009fyr.1	Plekhg2	4.07262	1.74317e-11	7.26333e-09	up	UCSC_knowngene	1954	chr7:28368679-28372662-	exon sense-overlapping	ENSMUST00000094644	Plekhg2	chr7:28359604-28372233-
chr8	45736921	45737380	diffreps_peak_00131274	5.2886	459	ENSMUST00000136119	Sorbs2	4.4209	5.1452e-06	8.61843e-05	up	Ensembl	6425	chr8:45658784-45742419+	exon sense-overlapping	ENSMUST00000135336	Sorbs2	chr8:45627803-45827873+
chr19	55742861	55743197	diffreps_peak_00070609	7.68884	336	ENSMUST00000133008	Tcf7l2	4.89606	2.04718e-08	1.09817e-06	up	Ensembl	691	chr19:55742845-55910681+	exon sense-overlapping	NM_001142922	Tcf7l2	chr19:55741810-55933655+
chr7	128274681	128275080	diffreps_peak_00127663	5.14565	399	ENSMUST00000154003	BC017158	3.57386	7.15067e-06	0.000113892	up	Ensembl	3302	chr7:128272107-128298109-	natural antisense	ENSMUST00000118169	Slc5a2	chr7:128265676-128272430+
chr15	77765421	77765828	diffreps_peak_00047020	9.00287	407	ENSMUST00000139729	Myh9	3.3632	9.93424e-10	1.39288e-07	up	Ensembl	723	chr15:77765328-77767190-	exon sense-overlapping	ENSMUST00000016771	Myh9	chr15:77760587-77842175-
chr12	111795351	111795678	diffreps_peak_00032783	7.19695	327	ENSMUST00000141435	Klc1	2.95382	6.35405e-08	2.47127e-06	up	Ensembl	806	chr12:111795352-111806726+	exon sense-overlapping	ENSMUST00000084941	Klc1	chr12:111758849-111806775+
chr4	43518401	43518920	diffreps_peak_00091098	7.63917	519	ENSMUST00000150262	Tpm2	4.40447	2.29527e-08	1.1871e-06	up	Ensembl	1545	chr4:43514711-43523438-	exon sense-overlapping	NM_009416	Tpm2	chr4:43513726-43523554-
chrX	74022632	74023197	diffreps_peak_00146930	10.9874	565	ENSMUST00000146210	Irak1	2.44874	1.0294e-11	5.19657e-09	up	Ensembl	576	chrX:74022633-74023376-	exon sense-overlapping	ENSMUST00000114360	Irak1	chrX:74013926-74023915-
chr2	132260585	132260900	diffreps_peak_00078500	9.6944	315	uc008mmm.1	AK007836	14.5	2.02115e-10	4.16385e-08	up	UCSC_knowngene	494	chr2:132253357-132260906+	bidirectional	NM_011045	Pcna	chr2:132249286-132253180-
chr4	148144861	148145196	diffreps_peak_00098396	5.73334	335	ENSMUST00000105708	Mad2l2	2.47125	1.84781e-06	3.63608e-05	up	Ensembl	487	chr4:148144790-148145451+	exon sense-overlapping	ENSMUST00000105707	Mad2l2	chr4:148140743-148145696+
chr8	45736921	45737380	diffreps_peak_00131274	5.2886	459	ENSMUST00000136119	Sorbs2	4.4209	5.1452e-06	8.61843e-05	up	Ensembl	6425	chr8:45658784-45742419+	exon sense-overlapping	ENSMUST00000126067	Sorbs2	chr8:45658709-45746589+
chr7	119783121	119783500	diffreps_peak_00126714	5.76717	379	ENSMUST00000125595	Eri2	9.95455	1.70935e-06	3.4141e-05	up	Ensembl	6025	chr7:119782573-119793975-	exon sense-overlapping	ENSMUST00000063902	Eri2	chr7:119771938-119793967-
chr8	122483241	122483620	diffreps_peak_00136528	12.3648	379	ENSMUST00000123671	Piezo1	3.85767	4.31754e-13	1.00772e-09	up	Ensembl	2860	chr8:122481721-122484780-	exon sense-overlapping	ENSMUST00000067252	Piezo1	chr8:122481698-122551329-
chr3	87971077	87971988	diffreps_peak_00085406	8.27687	911	ENSMUST00000159830	Nes	3.18151	5.28608e-09	4.47214e-07	up	Ensembl	1311	chr3:87971078-87973391+	exon sense-overlapping	NM_016701	Nes	chr3:87971093-87980451+
chr7	128274681	128275080	diffreps_peak_00127663	5.14565	399	ENSMUST00000154003	BC017158	3.57386	7.15067e-06	0.000113892	up	Ensembl	3302	chr7:128272107-128298109-	exon sense-overlapping	NM_145590	BC017158	chr7:128271379-128298131-
chr2	91260961	91261406	diffreps_peak_00076025	9.49127	445	ENSMUST00000126754	Pacsin3	2.13311	3.2265e-10	5.93246e-08	up	Ensembl	761	chr2:91260805-91261669+	exon sense-overlapping	NM_028733	Pacsin3	chr2:91257329-91264680+
chr19	55742861	55743197	diffreps_peak_00070609	7.68884	336	ENSMUST00000133008	Tcf7l2	4.89606	2.04718e-08	1.09817e-06	up	Ensembl	691	chr19:55742845-55910681+	exon sense-overlapping	ENSMUST00000111651	Tcf7l2	chr19:55742243-55912723+
chr16	58463401	58463823	diffreps_peak_00053938	7.41868	422	ENSMUST00000134324	Dcbld2	6.23989	3.81344e-08	1.70896e-06	up	Ensembl	891	chr16:58456377-58463823+	exon sense-overlapping	NM_028523	Dcbld2	chr16:58408535-58469745+
chr7	28370441	28370920	diffreps_peak_00120362	10.7587	479	uc009fyr.1	Plekhg2	4.07262	1.74317e-11	7.26333e-09	up	UCSC_knowngene	1954	chr7:28368679-28372662-	exon sense-overlapping	ENSMUST00000119990	Plekhg2	chr7:28359605-28372494-
chr8	71595281	71595600	diffreps_peak_00132735	7.18299	319	ENSMUST00000123240	Pgls	3.08501	6.56165e-08	2.53215e-06	up	Ensembl	2688	chr8:71592211-71595665+	exon sense-overlapping	ENSMUST00000143441	Pgls	chr8:71592291-71596269+
chr11	54337401	54338100	diffreps_peak_00019358	8.14014	699	ENSMUST00000127731	Acsl6	4.45482	7.24203e-09	5.55377e-07	up	Ensembl	4358	chr11:54335497-54361539+	exon sense-overlapping	ENSMUST00000139484	Acsl6	chr11:54345888-54361528+
chr8	71595281	71595600	diffreps_peak_00132735	7.18299	319	ENSMUST00000123240	Pgls	3.08501	6.56165e-08	2.53215e-06	up	Ensembl	2688	chr8:71592211-71595665+	exon sense-overlapping	ENSMUST00000138742	Pgls	chr8:71592237-71595111+
chr4	43631538	43631851	diffreps_peak_00091128	7.72356	313	ENSMUST00000137535	Gm12473	3.47411	1.8899e-08	1.04122e-06	up	Ensembl	579	chr4:43631539-43641533-	natural antisense	ENSMUST00000128549	Npr2	chr4:43641284-43651244+
chr1	126528421	126528755	diffreps_peak_00005170	7.67459	334	ENSMUST00000162647	Nckap5	3.73323	2.11551e-08	1.12369e-06	up	Ensembl	1510	chr1:126527540-126830481-	exon sense-overlapping	ENSMUST00000112583	Nckap5	chr1:125913637-126830632-
chr9	85843441	85843780	diffreps_peak_00142775	8.74545	339	uc009qwy.1	AK162386	2.36918	1.79703e-09	2.1752e-07	up	UCSC_knowngene	2334	chr9:85820241-85844131-	natural antisense	NM_001164792	Tpbg	chr9:85842852-85847055+
chr9	107558861	107559200	diffreps_peak_00143980	6.37971	339	ENSMUST00000129320	Rassf1	13.475	4.17145e-07	1.06496e-05	up	Ensembl	2375	chr9:107557942-107560435+	exon sense-overlapping	ENSMUST00000010211	Rassf1	chr9:107554656-107562263+
chr5	110386801	110387200	diffreps_peak_00105194	8.15513	399	ENSMUST00000180866	Gm26711	3.21036	6.99634e-09	5.42195e-07	up	Ensembl	1833	chr5:110385835-110388073+	natural antisense	NM_028596	Fbrsl1	chr5:110361752-110387127-
chr9	77957421	77957732	diffreps_peak_00142570	7.83033	311	ENSMUST00000148398	Elovl5	11.4724	1.47798e-08	8.82635e-07	up	Ensembl	685	chr9:77917434-77957732+	exon sense-overlapping	ENSMUST00000133757	Elovl5	chr9:77921932-77979868+
chr7	119783121	119783500	diffreps_peak_00126714	5.76717	379	ENSMUST00000125595	Eri2	9.95455	1.70935e-06	3.4141e-05	up	Ensembl	6025	chr7:119782573-119793975-	natural antisense	ENSMUST00000106529	Acsm3	chr7:119760924-119787513+
chr16	24393353	24393655	diffreps_peak_00052031	7.20759	302	NR_037954	1110054M08Rik	2.81649	6.20019e-08	2.42665e-06	up	RefSeq	876	chr16:24392556-24393655-	natural antisense	NM_178665	Lpp	chr16:24393350-24992578+
chr19	55742861	55743197	diffreps_peak_00070609	7.68884	336	ENSMUST00000133008	Tcf7l2	4.89606	2.04718e-08	1.09817e-06	up	Ensembl	691	chr19:55742845-55910681+	exon sense-overlapping	NM_001142921	Tcf7l2	chr19:55741810-55933655+
chr4	148144861	148145196	diffreps_peak_00098396	5.73334	335	ENSMUST00000105708	Mad2l2	2.47125	1.84781e-06	3.63608e-05	up	Ensembl	487	chr4:148144790-148145451+	exon sense-overlapping	ENSMUST00000084129	Mad2l2	chr4:148130915-148145699+
chr8	122483241	122483620	diffreps_peak_00136528	12.3648	379	ENSMUST00000123671	Piezo1	3.85767	4.31754e-13	1.00772e-09	up	Ensembl	2860	chr8:122481721-122484780-	natural antisense	NM_153775	Ctu2	chr8:122476143-122483092+
chr9	92542521	92542840	diffreps_peak_00143035	6.3511	319	NR_029474	B430319G15Rik	2.31124	4.45551e-07	1.12546e-05	up	RefSeq	4069	chr9:92538801-92542869-	natural antisense	NM_011961	Plod2	chr9:92542223-92608427+
chr4	43631538	43631851	diffreps_peak_00091128	7.72356	313	ENSMUST00000137535	Gm12473	3.47411	1.8899e-08	1.04122e-06	up	Ensembl	579	chr4:43631539-43641533-	natural antisense	ENSMUST00000123351	Npr2	chr4:43641262-43644379+
chr11	75569561	75569940	diffreps_peak_00021579	6.31749	379	uc007kef.1	Slc43a2	62.6	4.814e-07	1.19415e-05	up	UCSC_knowngene	2292	chr11:75566007-75570189+	exon sense-overlapping	NM_173388	Slc43a2	chr11:75531694-75577572+
chr1	121494821	121495200	diffreps_peak_00004947	6.37864	379	ENSMUST00000152959	Ccdc93	9.99213	4.18179e-07	1.06678e-05	up	Ensembl	3040	chr1:121491217-121499477+	exon sense-overlapping	NM_029955	Ccdc93	chr1:121431067-121506460+
chr8	122483241	122483620	diffreps_peak_00136528	12.3648	379	ENSMUST00000123671	Piezo1	3.85767	4.31754e-13	1.00772e-09	up	Ensembl	2860	chr8:122481721-122484780-	intronic antisense	ENSMUST00000127664	Gm20388	chr8:119910841-124345722+
chr5	151072801	151073120	diffreps_peak_00110385	7.21479	319	ENSMUST00000146814	Stard13	4.53559	6.09825e-08	2.39627e-06	up	Ensembl	2480	chr5:151071264-151190150-	exon sense-overlapping	ENSMUST00000129088	Stard13	chr5:151063546-151233774-
chr7	128275301	128275680	diffreps_peak_00127664	6.61919	379	ENSMUST00000154003	BC017158	6.33962	2.4033e-07	6.87272e-06	up	Ensembl	3302	chr7:128272107-128298109-	exon sense-overlapping	NM_145590	BC017158	chr7:128271379-128298131-
chr13	51847351	51847700	diffreps_peak_00035434	6.99446	349	ENSMUST00000132480	Gadd45g	4.64045	1.01283e-07	3.49434e-06	up	Ensembl	863	chr13:51846744-51848224+	exon sense-overlapping	NM_011817	Gadd45g	chr13:51846675-51848474+
chr1	186737587	186737960	diffreps_peak_00008824	5.22176	373	ENSMUST00000162336	Rrp15	2.38971	6.00117e-06	9.78535e-05	up	Ensembl	3092	chr1:186721092-186749325-	exon sense-overlapping	ENSMUST00000001339	Rrp15	chr1:186720978-186749358-
chr10	8885641	8886020	diffreps_peak_00009566	6.48617	379	ENSMUST00000180770	Gm26674	2.51856	3.26463e-07	8.77017e-06	up	Ensembl	1491	chr10:8884594-8886880+	natural antisense	ENSMUST00000015449	Sash1	chr10:8722219-8886070-
chr3	114147521	114147823	diffreps_peak_00087577	8.62206	302	ENSMUST00000138680	Col11a1	3.38913	2.38751e-09	2.6506e-07	up	Ensembl	2112	chr3:114147129-114153971+	exon sense-overlapping	ENSMUST00000092155	Col11a1	chr3:114030540-114220718+
chr11	55409641	55409997	diffreps_peak_00019495	5.8086	356	ENSMUST00000125787	Sparc	2.21893	1.55383e-06	3.14495e-05	up	Ensembl	907	chr11:55409204-55419900-	exon sense-overlapping	ENSMUST00000141530	Sparc	chr11:55399252-55419898-
chr5	110386801	110387200	diffreps_peak_00105194	8.15513	399	ENSMUST00000180866	Gm26711	3.21036	6.99634e-09	5.42195e-07	up	Ensembl	1833	chr5:110385835-110388073+	intronic antisense	ENSMUST00000069483	Fbrsl1	chr5:110361754-110448503-
chr2	91260961	91261406	diffreps_peak_00076025	9.49127	445	ENSMUST00000126754	Pacsin3	2.13311	3.2265e-10	5.93246e-08	up	Ensembl	761	chr2:91260805-91261669+	exon sense-overlapping	NM_030880	Pacsin3	chr2:91256813-91264680+
chr11	54337401	54338100	diffreps_peak_00019358	8.14014	699	ENSMUST00000127731	Acsl6	4.45482	7.24203e-09	5.55377e-07	up	Ensembl	4358	chr11:54335497-54361539+	exon sense-overlapping	ENSMUST00000064690	Acsl6	chr11:54314988-54337728+
chr2	91260961	91261406	diffreps_peak_00076025	9.49127	445	ENSMUST00000126754	Pacsin3	2.13311	3.2265e-10	5.93246e-08	up	Ensembl	761	chr2:91260805-91261669+	exon sense-overlapping	ENSMUST00000138470	Pacsin3	chr2:91259829-91261598+
chr2	91260961	91261406	diffreps_peak_00076025	9.49127	445	ENSMUST00000126754	Pacsin3	2.13311	3.2265e-10	5.93246e-08	up	Ensembl	761	chr2:91260805-91261669+	exon sense-overlapping	ENSMUST00000134699	Pacsin3	chr2:91255954-91261569+
chr19	3897481	3897831	diffreps_peak_00067041	5.75645	350	ENSMUST00000134698	Tcirg1	3.99542	1.75205e-06	3.48639e-05	up	Ensembl	463	chr19:3897071-3897831-	exon sense-overlapping	NM_016921	Tcirg1	chr19:3896050-3905230-
chr9	124439661	124440122	diffreps_peak_00145423	5.39622	461	uc029xhe.1	AK054122	2.31847	4.01585e-06	6.97219e-05	up	UCSC_knowngene	795	chr9:124438995-124440897-	exon sense-overlapping	ENSMUST00000180233	Gm20783	chr9:124438996-124440899-
chr1	126528421	126528755	diffreps_peak_00005170	7.67459	334	ENSMUST00000162647	Nckap5	3.73323	2.11551e-08	1.12369e-06	up	Ensembl	1510	chr1:126527540-126830481-	exon sense-overlapping	ENSMUST00000160693	Nckap5	chr1:126258401-126738202-
chr4	43518401	43518920	diffreps_peak_00091098	7.63917	519	ENSMUST00000150262	Tpm2	4.40447	2.29527e-08	1.1871e-06	up	Ensembl	1545	chr4:43514711-43523438-	exon sense-overlapping	NM_001277875	Tpm2	chr4:43513726-43523554-
chr2	105692736	105693040	diffreps_peak_00076802	11.2961	304	ENSMUST00000147946	Pax6	2.78019	5.05698e-12	3.45953e-09	up	Ensembl	527	chr2:105692483-105693125+	exon sense-overlapping	ENSMUST00000111087	Pax6	chr2:105668900-105697363+
chr10	128249520	128249860	diffreps_peak_00016439	6.50906	340	ENSMUST00000136854	Timeless	3.72414	3.097e-07	8.40176e-06	up	Ensembl	560	chr10:128249213-128249860+	exon sense-overlapping	NM_011589	Timeless	chr10:128238066-128252941+
chr8	25675441	25675742	diffreps_peak_00130588	7.07686	301	uc009lgo.1	Whsc1l1	3.65759	8.37791e-08	3.04583e-06	up	UCSC_knowngene	2577	chr8:25674436-25677972+	exon sense-overlapping	ENSMUST00000084026	Whsc1l1	chr8:25640284-25719667+
chr16	98062621	98063340	diffreps_peak_00055610	5.16053	719	NR_015491	A630089N07Rik	2.77563	6.90995e-06	0.000110599	up	RefSeq	2131	chr16:98062512-98082439-	intergenic	NA	NA	NA
chr8	45736921	45737380	diffreps_peak_00131274	5.2886	459	ENSMUST00000136119	Sorbs2	4.4209	5.1452e-06	8.61843e-05	up	Ensembl	6425	chr8:45658784-45742419+	exon sense-overlapping	ENSMUST00000134675	Sorbs2	chr8:45658670-45776882+
chr9	77957421	77957732	diffreps_peak_00142570	7.83033	311	ENSMUST00000148398	Elovl5	11.4724	1.47798e-08	8.82635e-07	up	Ensembl	685	chr9:77917434-77957732+	exon sense-overlapping	ENSMUST00000134072	Elovl5	chr9:77941291-77961021+
chr11	116679906	116680420	diffreps_peak_00026060	9.00958	514	ENSMUST00000144398	St6galnac2	3.00443	9.78191e-10	1.38027e-07	up	Ensembl	1683	chr11:116677483-116681290-	exon sense-overlapping	NM_009180	St6galnac2	chr11:116676705-116694660-
chr1	91296581	91296936	diffreps_peak_00004148	5.00181	355	ENSMUST00000117121	Gm7785	2.27661	9.95844e-06	0.000151532	up	Ensembl	892	chr1:91296045-91296936+	intergenic	NA	NA	NA
chr3	145652021	145652472	diffreps_peak_00088691	11.427	451	uc012czd.2	FJ422280	6.31948	3.74153e-12	2.88829e-09	up	UCSC_knowngene	1699	chr3:145650312-145652472+	bidirectional	NM_010516	Cyr61	chr3:145646971-145649985-
chr8	14925049	14925420	diffreps_peak_00129934	7.21464	371	ENSMUST00000160619	Arhgef10	2.15055	6.10041e-08	2.39658e-06	up	Ensembl	3289	chr8:14911717-14928291+	exon sense-overlapping	ENSMUST00000084207	Arhgef10	chr8:14911663-15001085+
chr2	91260961	91261406	diffreps_peak_00076025	9.49127	445	ENSMUST00000126754	Pacsin3	2.13311	3.2265e-10	5.93246e-08	up	Ensembl	761	chr2:91260805-91261669+	exon sense-overlapping	NM_001289678	Pacsin3	chr2:91256813-91264680+
chr19	38735861	38736180	diffreps_peak_00069398	5.33731	319	ENSMUST00000183131	Plce1	15.7368	4.59923e-06	7.83085e-05	up	Ensembl	4220	chr19:38734914-38751123+	exon sense-overlapping	ENSMUST00000182481	Plce1	chr19:38481121-38783430+
chr8	14925049	14925420	diffreps_peak_00129934	7.21464	371	ENSMUST00000160619	Arhgef10	2.15055	6.10041e-08	2.39658e-06	up	Ensembl	3289	chr8:14911717-14928291+	exon sense-overlapping	ENSMUST00000110800	Arhgef10	chr8:14911738-15001085+
chr16	35662470	35662898	diffreps_peak_00052842	6.5815	428	ENSMUST00000128966	Sema5b	2.9541	2.62117e-07	7.36676e-06	up	Ensembl	766	chr16:35662471-35663454+	exon sense-overlapping	ENSMUST00000149855	Sema5b	chr16:35658585-35664732+
chr10	128249520	128249860	diffreps_peak_00016439	6.50906	340	ENSMUST00000136854	Timeless	3.72414	3.097e-07	8.40176e-06	up	Ensembl	560	chr10:128249213-128249860+	exon sense-overlapping	NM_001164080	Timeless	chr10:128232063-128252941+
chr7	78899370	78899699	diffreps_peak_00123697	6.51568	329	ENSMUST00000172017	Aen	2.68698	3.05013e-07	8.29956e-06	up	Ensembl	393	chr7:78895951-78899699+	exon sense-overlapping	NM_001162939	Aen	chr7:78895927-78908833+
chr7	119783121	119783500	diffreps_peak_00126714	5.76717	379	ENSMUST00000125595	Eri2	9.95455	1.70935e-06	3.4141e-05	up	Ensembl	6025	chr7:119782573-119793975-	natural antisense	NM_016870	Acsm3	chr7:119760923-119784896+
chr1	45389801	45390240	diffreps_peak_00001855	13.0855	439	ENSMUST00000150143	Col5a2	8.59029	8.21377e-14	8.98318e-10	up	Ensembl	2951	chr1:45389031-45393634-	exon sense-overlapping	ENSMUST00000086430	Col5a2	chr1:45374321-45503282-
chr16	42907391	42907721	diffreps_peak_00053383	6.99568	330	ENSMUST00000131689	Zbtb20	3.24142	1.01001e-07	3.49434e-06	up	Ensembl	425	chr16:42907392-43072468+	exon sense-overlapping	ENSMUST00000114694	Zbtb20	chr16:42907652-43642602+
chr10	128249520	128249860	diffreps_peak_00016439	6.50906	340	ENSMUST00000136854	Timeless	3.72414	3.097e-07	8.40176e-06	up	Ensembl	560	chr10:128249213-128249860+	exon sense-overlapping	ENSMUST00000105242	Timeless	chr10:128232134-128252941+
chr16	42907391	42907721	diffreps_peak_00053383	6.99568	330	ENSMUST00000131689	Zbtb20	3.24142	1.01001e-07	3.49434e-06	up	Ensembl	425	chr16:42907392-43072468+	exon sense-overlapping	ENSMUST00000151244	Zbtb20	chr16:42907645-43577725+
chr11	90657501	90657840	diffreps_peak_00023161	6.71736	339	ENSMUST00000147329	Tom1l1	3.80105	1.91706e-07	5.77043e-06	up	Ensembl	2694	chr11:90657072-90663312-	exon sense-overlapping	ENSMUST00000107867	Tom1l1	chr11:90645690-90662999-
chr8	25675441	25675742	diffreps_peak_00130588	7.07686	301	uc009lgo.1	Whsc1l1	3.65759	8.37791e-08	3.04583e-06	up	UCSC_knowngene	2577	chr8:25674436-25677972+	exon sense-overlapping	NM_001081269	Whsc1l1	chr8:25640284-25719667+
chr10	8885641	8886020	diffreps_peak_00009566	6.48617	379	ENSMUST00000180770	Gm26674	2.51856	3.26463e-07	8.77017e-06	up	Ensembl	1491	chr10:8884594-8886880+	natural antisense	NM_175155	Sash1	chr10:8722219-8886070-
chr1	126528421	126528755	diffreps_peak_00005170	7.67459	334	ENSMUST00000162647	Nckap5	3.73323	2.11551e-08	1.12369e-06	up	Ensembl	1510	chr1:126527540-126830481-	exon sense-overlapping	ENSMUST00000162646	Nckap5	chr1:126222627-126830799-
chr4	148144861	148145196	diffreps_peak_00098396	5.73334	335	ENSMUST00000105708	Mad2l2	2.47125	1.84781e-06	3.63608e-05	up	Ensembl	487	chr4:148144790-148145451+	exon sense-overlapping	NM_027985	Mad2l2	chr4:148140490-148145704+
chr5	24429181	24429578	diffreps_peak_00100701	7.541	397	ENSMUST00000155636	Slc4a2	2.79997	2.87737e-08	1.39605e-06	up	Ensembl	637	chr5:24429018-24429779+	exon sense-overlapping	NM_009207	Slc4a2	chr5:24425232-24440947+
chr7	127979181	127979620	diffreps_peak_00127631	7.95361	439	uc009jxs.1	AK134717	2.37481	1.11273e-08	7.34634e-07	up	UCSC_knowngene	1514	chr7:127978141-127979654+	exon sense-overlapping	NM_139149	Fus	chr7:127967479-127982031+
chr2	51960301	51960660	diffreps_peak_00074419	5.86748	359	ENSMUST00000123521	Nmi	2.94189	1.35683e-06	2.804e-05	up	Ensembl	487	chr2:51960236-51972970-	exon sense-overlapping	NM_019401	Nmi	chr2:51948499-51973208-
chr2	51960301	51960660	diffreps_peak_00074419	5.86748	359	ENSMUST00000123521	Nmi	2.94189	1.35683e-06	2.804e-05	up	Ensembl	487	chr2:51960236-51972970-	exon sense-overlapping	ENSMUST00000145656	Nmi	chr2:51956044-51973494-
chr6	34662127	34662460	diffreps_peak_00111769	8.20086	333	ENSMUST00000127055	Cald1	4.8655	6.29711e-09	5.0334e-07	up	Ensembl	667	chr6:34598620-34662748+	exon sense-overlapping	ENSMUST00000115026	Cald1	chr6:34598565-34775466+
chr19	55742861	55743197	diffreps_peak_00070609	7.68884	336	ENSMUST00000133008	Tcf7l2	4.89606	2.04718e-08	1.09817e-06	up	Ensembl	691	chr19:55742845-55910681+	exon sense-overlapping	ENSMUST00000111656	Tcf7l2	chr19:55742332-55933654+
chr11	75569561	75569940	diffreps_peak_00021579	6.31749	379	uc007kef.1	Slc43a2	62.6	4.814e-07	1.19415e-05	up	UCSC_knowngene	2292	chr11:75566007-75570189+	exon sense-overlapping	NM_001199283	Slc43a2	chr11:75532112-75577572+
chr2	173021912	173022540	diffreps_peak_00081627	5.81722	628	ENSMUST00000155512	Rbm38	2.59895	1.52327e-06	3.09699e-05	up	Ensembl	2281	chr2:173021913-173034728+	exon sense-overlapping	ENSMUST00000173979	Rbm38	chr2:173022831-173034178+
chr18	73863630	73864220	diffreps_peak_00065994	11.3138	590	ENSMUST00000139821	Mro	3.32929	4.85488e-12	3.42765e-09	up	Ensembl	1877	chr18:73863631-73870209+	exon sense-overlapping	ENSMUST00000134847	Mro	chr18:73863672-73871980+
chr5	110386801	110387200	diffreps_peak_00105194	8.15513	399	ENSMUST00000180866	Gm26711	3.21036	6.99634e-09	5.42195e-07	up	Ensembl	1833	chr5:110385835-110388073+	intronic antisense	NM_001142642	Fbrsl1	chr5:110361752-110448503-
chr4	43518401	43518920	diffreps_peak_00091098	7.63917	519	ENSMUST00000150262	Tpm2	4.40447	2.29527e-08	1.1871e-06	up	Ensembl	1545	chr4:43514711-43523438-	exon sense-overlapping	ENSMUST00000030184	Tpm2	chr4:43514711-43523464-
chr3	95009081	95009600	diffreps_peak_00086203	5.14961	519	ENSMUST00000146169	Zfp687	2.5677	7.08578e-06	0.000113067	up	Ensembl	4930	chr3:95006590-95011807-	natural antisense	NM_175356	Pi4kb	chr3:94974731-95006937+
chr3	87971077	87971988	diffreps_peak_00085406	8.27687	911	ENSMUST00000159830	Nes	3.18151	5.28608e-09	4.47214e-07	up	Ensembl	1311	chr3:87971078-87973391+	exon sense-overlapping	ENSMUST00000160694	Nes	chr3:87971129-87980451+
chr6	125164921	125165280	diffreps_peak_00116953	6.09847	359	ENSMUST00000144588	Gapdh	3.76012	7.97136e-07	1.80531e-05	up	Ensembl	769	chr6:125164597-125165605-	exon sense-overlapping	NM_008084	Gapdh	chr6:125161852-125165773-
chr11	54337401	54338100	diffreps_peak_00019358	8.14014	699	ENSMUST00000127731	Acsl6	4.45482	7.24203e-09	5.55377e-07	up	Ensembl	4358	chr11:54335497-54361539+	exon sense-overlapping	ENSMUST00000094194	Acsl6	chr11:54319856-54361501+
chr8	122483241	122483620	diffreps_peak_00136528	12.3648	379	ENSMUST00000123671	Piezo1	3.85767	4.31754e-13	1.00772e-09	up	Ensembl	2860	chr8:122481721-122484780-	exon sense-overlapping	NM_001037298	Piezo1	chr8:122481698-122551329-
chr15	102710224	102710530	diffreps_peak_00049988	9.81604	306	ENSMUST00000166943	Calcoco1	2.04914	1.52743e-10	3.34101e-08	up	Ensembl	863	chr15:102710225-102715796-	exon sense-overlapping	ENSMUST00000023818	Calcoco1	chr15:102706779-102722178-
chr2	105692736	105693040	diffreps_peak_00076802	11.2961	304	ENSMUST00000147946	Pax6	2.78019	5.05698e-12	3.45953e-09	up	Ensembl	527	chr2:105692483-105693125+	exon sense-overlapping	ENSMUST00000111083	Pax6	chr2:105675527-105697071+
chr6	125164921	125165280	diffreps_peak_00116953	6.09847	359	ENSMUST00000144588	Gapdh	3.76012	7.97136e-07	1.80531e-05	up	Ensembl	769	chr6:125164597-125165605-	exon sense-overlapping	ENSMUST00000117757	Gapdh	chr6:125161853-125166467-
chr2	105692736	105693040	diffreps_peak_00076802	11.2961	304	ENSMUST00000147946	Pax6	2.78019	5.05698e-12	3.45953e-09	up	Ensembl	527	chr2:105692483-105693125+	exon sense-overlapping	ENSMUST00000111086	Pax6	chr2:105668900-105697360+
chr11	68990801	68991159	diffreps_peak_00020602	8.31891	358	ENSMUST00000173410	Pfas	3.7785	4.79832e-09	4.16293e-07	up	Ensembl	927	chr11:68990721-68991825-	exon sense-overlapping	NM_001159519	Pfas	chr11:68985701-69008460-
chr2	155818421	155818800	diffreps_peak_00079864	7.19212	379	NR_015528	BC029722	2.97954	6.42504e-08	2.49072e-06	up	RefSeq	1403	chr2:155817732-155819203-	natural antisense	NM_010808	Mmp24	chr2:155775344-155818366+
chr11	54337401	54338100	diffreps_peak_00019358	8.14014	699	ENSMUST00000127731	Acsl6	4.45482	7.24203e-09	5.55377e-07	up	Ensembl	4358	chr11:54335497-54361539+	exon sense-overlapping	ENSMUST00000093106	Acsl6	chr11:54303798-54364756+
chr19	55742861	55743197	diffreps_peak_00070609	7.68884	336	ENSMUST00000133008	Tcf7l2	4.89606	2.04718e-08	1.09817e-06	up	Ensembl	691	chr19:55742845-55910681+	exon sense-overlapping	ENSMUST00000111654	Tcf7l2	chr19:55741884-55925239+
chr7	29331103	29331420	diffreps_peak_00120585	8.44003	317	ENSMUST00000183164	Sipa1l3	4.11946	3.63057e-09	3.44135e-07	up	Ensembl	712	chr7:29331104-29339063-	exon sense-overlapping	ENSMUST00000085809	Sipa1l3	chr7:29320378-29505460-
chr15	77765421	77765828	diffreps_peak_00047020	9.00287	407	ENSMUST00000139729	Myh9	3.3632	9.93424e-10	1.39288e-07	up	Ensembl	723	chr15:77765328-77767190-	exon sense-overlapping	NM_022410	Myh9	chr15:77760585-77842175-
chr19	55742861	55743197	diffreps_peak_00070609	7.68884	336	ENSMUST00000133008	Tcf7l2	4.89606	2.04718e-08	1.09817e-06	up	Ensembl	691	chr19:55742845-55910681+	exon sense-overlapping	NM_001142920	Tcf7l2	chr19:55741810-55933655+
chr8	45736921	45737380	diffreps_peak_00131274	5.2886	459	ENSMUST00000136119	Sorbs2	4.4209	5.1452e-06	8.61843e-05	up	Ensembl	6425	chr8:45658784-45742419+	exon sense-overlapping	ENSMUST00000067065	Sorbs2	chr8:45507788-45827906+
chr11	90657501	90657840	diffreps_peak_00023161	6.71736	339	ENSMUST00000147329	Tom1l1	3.80105	1.91706e-07	5.77043e-06	up	Ensembl	2694	chr11:90657072-90663312-	exon sense-overlapping	NM_028011	Tom1l1	chr11:90645691-90687601-
chr4	148144861	148145196	diffreps_peak_00098396	5.73334	335	ENSMUST00000105708	Mad2l2	2.47125	1.84781e-06	3.63608e-05	up	Ensembl	487	chr4:148144790-148145451+	exon sense-overlapping	ENSMUST00000030860	Mad2l2	chr4:148140182-148145699+
chr12	111795351	111795678	diffreps_peak_00032783	7.19695	327	ENSMUST00000141435	Klc1	2.95382	6.35405e-08	2.47127e-06	up	Ensembl	806	chr12:111795352-111806726+	intronic antisense	NM_028875	Xrcc3	chr12:111803193-111813841-
chr7	78899370	78899699	diffreps_peak_00123697	6.51568	329	ENSMUST00000172017	Aen	2.68698	3.05013e-07	8.29956e-06	up	Ensembl	393	chr7:78895951-78899699+	exon sense-overlapping	ENSMUST00000107423	Aen	chr7:78896009-78908378+
chr3	127595061	127595420	diffreps_peak_00088105	8.75755	359	uc008rhg.2	Zgrf1	113.8	1.74765e-09	2.13235e-07	up	UCSC_knowngene	8088	chr3:127553502-127618023+	exon sense-overlapping	ENSMUST00000043108	4930422G04Rik	chr3:127553489-127618021+
chr15	102710224	102710530	diffreps_peak_00049988	9.81604	306	ENSMUST00000166943	Calcoco1	2.04914	1.52743e-10	3.34101e-08	up	Ensembl	863	chr15:102710225-102715796-	exon sense-overlapping	ENSMUST00000171838	Calcoco1	chr15:102707585-102722131-
chr7	4752141	4752528	diffreps_peak_00118384	7.2937	387	ENSMUST00000182272	Cox6b2	3.94714	5.08514e-08	2.10929e-06	up	Ensembl	519	chr7:4751925-4752528-	exon sense-overlapping	NM_001289849	Cox6b2	chr7:4751792-4753094-
chr2	105692736	105693040	diffreps_peak_00076802	11.2961	304	ENSMUST00000147946	Pax6	2.78019	5.05698e-12	3.45953e-09	up	Ensembl	527	chr2:105692483-105693125+	exon sense-overlapping	ENSMUST00000090397	Pax6	chr2:105675191-105697242+
chr6	125164921	125165280	diffreps_peak_00116953	6.09847	359	ENSMUST00000144588	Gapdh	3.76012	7.97136e-07	1.80531e-05	up	Ensembl	769	chr6:125164597-125165605-	exon sense-overlapping	ENSMUST00000118875	Gapdh	chr6:125161854-125165773-
chr3	95009081	95009600	diffreps_peak_00086203	5.14961	519	ENSMUST00000146169	Zfp687	2.5677	7.08578e-06	0.000113067	up	Ensembl	4930	chr3:95006590-95011807-	natural antisense	NM_001293715	Pi4kb	chr3:94974731-95006937+
chrX	74022632	74023197	diffreps_peak_00146930	10.9874	565	ENSMUST00000146210	Irak1	2.44874	1.0294e-11	5.19657e-09	up	Ensembl	576	chrX:74022633-74023376-	exon sense-overlapping	NM_008363	Irak1	chrX:74013918-74023921-
chr2	105692736	105693040	diffreps_peak_00076802	11.2961	304	ENSMUST00000147946	Pax6	2.78019	5.05698e-12	3.45953e-09	up	Ensembl	527	chr2:105692483-105693125+	exon sense-overlapping	ENSMUST00000111088	Pax6	chr2:105671860-105697242+
chr7	4752141	4752528	diffreps_peak_00118384	7.2937	387	ENSMUST00000182272	Cox6b2	3.94714	5.08514e-08	2.10929e-06	up	Ensembl	519	chr7:4751925-4752528-	exon sense-overlapping	ENSMUST00000182738	Cox6b2	chr7:4751794-4753009-
chr15	98209181	98209520	diffreps_peak_00049243	9.49597	339	uc007xmc.2	Olfr287	11.6623	3.19173e-10	5.88489e-08	up	UCSC_knowngene	1050	chr15:98208940-98221056-	exon sense-overlapping	ENSMUST00000170618	Olfr287	chr15:98206971-98221056-
chr7	128275301	128275680	diffreps_peak_00127664	6.61919	379	ENSMUST00000154003	BC017158	6.33962	2.4033e-07	6.87272e-06	up	Ensembl	3302	chr7:128272107-128298109-	exon sense-overlapping	ENSMUST00000137677	BC017158	chr7:128287965-128290615-
chr7	29331103	29331420	diffreps_peak_00120585	8.44003	317	ENSMUST00000183164	Sipa1l3	4.11946	3.63057e-09	3.44135e-07	up	Ensembl	712	chr7:29331104-29339063-	exon sense-overlapping	ENSMUST00000183096	Sipa1l3	chr7:29320378-29505460-
chr8	45736921	45737380	diffreps_peak_00131274	5.2886	459	ENSMUST00000136119	Sorbs2	4.4209	5.1452e-06	8.61843e-05	up	Ensembl	6425	chr8:45658784-45742419+	exon sense-overlapping	ENSMUST00000134321	Sorbs2	chr8:45627745-45745807+
chr11	54337401	54338100	diffreps_peak_00019358	8.14014	699	ENSMUST00000127731	Acsl6	4.45482	7.24203e-09	5.55377e-07	up	Ensembl	4358	chr11:54335497-54361539+	exon sense-overlapping	ENSMUST00000072178	Acsl6	chr11:54314896-54361197+
chr16	35662470	35662898	diffreps_peak_00052842	6.5815	428	ENSMUST00000128966	Sema5b	2.9541	2.62117e-07	7.36676e-06	up	Ensembl	766	chr16:35662471-35663454+	exon sense-overlapping	ENSMUST00000120756	Sema5b	chr16:35541362-35664261+
chr7	4752141	4752528	diffreps_peak_00118384	7.2937	387	ENSMUST00000182272	Cox6b2	3.94714	5.08514e-08	2.10929e-06	up	Ensembl	519	chr7:4751925-4752528-	exon sense-overlapping	NM_001289848	Cox6b2	chr7:4751792-4753094-
chr9	109094601	109095060	diffreps_peak_00144346	5.9026	459	ENSMUST00000134690	Gm7628	3.66034	1.25142e-06	2.62415e-05	up	Ensembl	2010	chr9:109093844-109097796-	intronic antisense	ENSMUST00000130366	Plxnb1	chr9:109096710-109100498+
chr2	132260585	132260900	diffreps_peak_00078500	9.6944	315	uc008mmm.1	AK007836	14.5	2.02115e-10	4.16385e-08	up	UCSC_knowngene	494	chr2:132253357-132260906+	bidirectional	uc008mml.1	Pcna	chr2:132249286-132253180-
chr10	128249520	128249860	diffreps_peak_00016439	6.50906	340	ENSMUST00000136854	Timeless	3.72414	3.097e-07	8.40176e-06	up	Ensembl	560	chr10:128249213-128249860+	exon sense-overlapping	ENSMUST00000105245	Timeless	chr10:128238066-128252941+
chr2	119812059	119812420	diffreps_peak_00077406	5.79975	361	ENSMUST00000147761	Tyro3	3.57246	1.5858e-06	3.20312e-05	up	Ensembl	3529	chr2:119809208-119818091+	exon sense-overlapping	NM_019392	Tyro3	chr2:119799514-119818103+
chr2	105692736	105693040	diffreps_peak_00076802	11.2961	304	ENSMUST00000147946	Pax6	2.78019	5.05698e-12	3.45953e-09	up	Ensembl	527	chr2:105692483-105693125+	exon sense-overlapping	NM_001244200	Pax6	chr2:105675513-105697364+
chr7	29331103	29331420	diffreps_peak_00120585	8.44003	317	ENSMUST00000183164	Sipa1l3	4.11946	3.63057e-09	3.44135e-07	up	Ensembl	712	chr7:29331104-29339063-	exon sense-overlapping	NM_001081028	Sipa1l3	chr7:29320378-29505460-
chr1	45389101	45389700	diffreps_peak_00001854	7.33335	599	ENSMUST00000150143	Col5a2	8.94591	4.64144e-08	1.97348e-06	up	Ensembl	2951	chr1:45389031-45393634-	exon sense-overlapping	ENSMUST00000086430	Col5a2	chr1:45374321-45503282-
chr9	77957421	77957732	diffreps_peak_00142570	7.83033	311	ENSMUST00000148398	Elovl5	11.4724	1.47798e-08	8.82635e-07	up	Ensembl	685	chr9:77917434-77957732+	exon sense-overlapping	ENSMUST00000034904	Elovl5	chr9:77917364-77984519+
chr19	55742861	55743197	diffreps_peak_00070609	7.68884	336	ENSMUST00000133008	Tcf7l2	4.89606	2.04718e-08	1.09817e-06	up	Ensembl	691	chr19:55742845-55910681+	exon sense-overlapping	ENSMUST00000153888	Tcf7l2	chr19:55742468-55932209+
chr8	72138341	72138737	diffreps_peak_00132807	7.67374	396	ENSMUST00000181918	Gm26586	2.96195	2.11962e-08	1.12527e-06	up	Ensembl	1745	chr8:72137389-72140820-	natural antisense	ENSMUST00000003575	Tpm4	chr8:72135259-72153142+
chr6	125164921	125165280	diffreps_peak_00116953	6.09847	359	ENSMUST00000144588	Gapdh	3.76012	7.97136e-07	1.80531e-05	up	Ensembl	769	chr6:125164597-125165605-	exon sense-overlapping	ENSMUST00000182277	Gapdh	chr6:125163288-125165603-
chr4	24966561	24966900	diffreps_peak_00090078	6.47752	339	ENSMUST00000130085	C230012O17Rik	5.64655	3.33031e-07	8.91522e-06	up	Ensembl	2999	chr4:24962330-24967083-	intergenic	NA	NA	NA
chr8	32008921	32009600	diffreps_peak_00130793	8.40059	679	ENSMUST00000181702	Gm26578	3.3148	3.97571e-09	3.67715e-07	up	Ensembl	4611	chr8:32008504-32015759+	intergenic	NA	NA	NA
chr11	75569561	75569940	diffreps_peak_00021579	6.31749	379	uc007kef.1	Slc43a2	62.6	4.814e-07	1.19415e-05	up	UCSC_knowngene	2292	chr11:75566007-75570189+	exon sense-overlapping	NM_001199284	Slc43a2	chr11:75531694-75577572+
chr2	91260961	91261406	diffreps_peak_00076025	9.49127	445	ENSMUST00000126754	Pacsin3	2.13311	3.2265e-10	5.93246e-08	up	Ensembl	761	chr2:91260805-91261669+	exon sense-overlapping	ENSMUST00000028694	Pacsin3	chr2:91256813-91264678+
chr3	95009081	95009600	diffreps_peak_00086203	5.14961	519	ENSMUST00000146169	Zfp687	2.5677	7.08578e-06	0.000113067	up	Ensembl	4930	chr3:95006590-95011807-	natural antisense	ENSMUST00000125476	Pi4kb	chr3:94976117-95006781+
chr2	51960301	51960660	diffreps_peak_00074419	5.86748	359	ENSMUST00000123521	Nmi	2.94189	1.35683e-06	2.804e-05	up	Ensembl	487	chr2:51960236-51972970-	exon sense-overlapping	ENSMUST00000145481	Nmi	chr2:51948501-51973004-
chr19	3897481	3897831	diffreps_peak_00067041	5.75645	350	ENSMUST00000134698	Tcirg1	3.99542	1.75205e-06	3.48639e-05	up	Ensembl	463	chr19:3897071-3897831-	exon sense-overlapping	ENSMUST00000126070	Tcirg1	chr19:3896050-3906991-
chr11	55409641	55409997	diffreps_peak_00019495	5.8086	356	ENSMUST00000125787	Sparc	2.21893	1.55383e-06	3.14495e-05	up	Ensembl	907	chr11:55409204-55419900-	exon sense-overlapping	NM_009242	Sparc	chr11:55394159-55420080-
chr1	156063321	156063694	diffreps_peak_00006685	11.0204	373	ENSMUST00000125371	Tor1aip2	4.28531	9.54107e-12	5.0076e-09	up	Ensembl	624	chr1:156063213-156064842+	exon sense-overlapping	ENSMUST00000111757	Tor1aip2	chr1:156035403-156068861+
chr1	126528421	126528755	diffreps_peak_00005170	7.67459	334	ENSMUST00000162647	Nckap5	3.73323	2.11551e-08	1.12369e-06	up	Ensembl	1510	chr1:126527540-126830481-	exon sense-overlapping	NM_001081756	Nckap5	chr1:125913636-126830632-
chr7	119783121	119783500	diffreps_peak_00126714	5.76717	379	ENSMUST00000125595	Eri2	9.95455	1.70935e-06	3.4141e-05	up	Ensembl	6025	chr7:119782573-119793975-	natural antisense	ENSMUST00000106526	Acsm3	chr7:119766371-119784896+
chr8	45736921	45737380	diffreps_peak_00131274	5.2886	459	ENSMUST00000136119	Sorbs2	4.4209	5.1452e-06	8.61843e-05	up	Ensembl	6425	chr8:45658784-45742419+	exon sense-overlapping	ENSMUST00000150102	Sorbs2	chr8:45688333-45759141+
chr8	45736921	45737380	diffreps_peak_00131274	5.2886	459	ENSMUST00000136119	Sorbs2	4.4209	5.1452e-06	8.61843e-05	up	Ensembl	6425	chr8:45658784-45742419+	exon sense-overlapping	NM_001205219	Sorbs2	chr8:45507788-45827906+
chr19	55742861	55743197	diffreps_peak_00070609	7.68884	336	ENSMUST00000133008	Tcf7l2	4.89606	2.04718e-08	1.09817e-06	up	Ensembl	691	chr19:55742845-55910681+	exon sense-overlapping	ENSMUST00000111662	Tcf7l2	chr19:55741820-55933229+
chr6	125164921	125165280	diffreps_peak_00116953	6.09847	359	ENSMUST00000144588	Gapdh	3.76012	7.97136e-07	1.80531e-05	up	Ensembl	769	chr6:125164597-125165605-	exon sense-overlapping	ENSMUST00000073605	Gapdh	chr6:125161854-125166467-
chr10	80342361	80342740	diffreps_peak_00013301	5.52767	379	NR_104339	Adamtsl5	5.45	2.96706e-06	5.41528e-05	up	RefSeq	3559	chr10:80339793-80348448-	exon sense-overlapping	ENSMUST00000095446	Adamtsl5	chr10:80340841-80348412-
chr16	58463401	58463823	diffreps_peak_00053938	7.41868	422	ENSMUST00000134324	Dcbld2	6.23989	3.81344e-08	1.70896e-06	up	Ensembl	891	chr16:58456377-58463823+	exon sense-overlapping	ENSMUST00000046663	Dcbld2	chr16:58408443-58469727+
chr19	5844781	5845480	diffreps_peak_00067489	9.9409	699	NR_003513	Neat1	2.99658	1.14577e-10	2.71904e-08	up	RefSeq	3190	chr19:5842296-5845480-	intergenic	NA	NA	NA
chr4	123902841	123903220	diffreps_peak_00095185	6.03418	379	ENSMUST00000067277	D130007C19Rik	13.7368	9.24324e-07	2.03643e-05	up	Ensembl	1505	chr4:123902129-123903634-	intergenic	NA	NA	NA
chr9	92542521	92542840	diffreps_peak_00143035	6.3511	319	NR_029474	B430319G15Rik	2.31124	4.45551e-07	1.12546e-05	up	RefSeq	4069	chr9:92538801-92542869-	natural antisense	ENSMUST00000070522	Plod2	chr9:92542223-92608428+
chr6	72388281	72388660	diffreps_peak_00113519	7.59145	379	ENSMUST00000142613	Vamp8	3.70527	2.56181e-08	1.28319e-06	up	Ensembl	2076	chr6:72385228-72389911-	exon sense-overlapping	NM_016794	Vamp8	chr6:72385221-72390667-
chr3	127595061	127595420	diffreps_peak_00088105	8.75755	359	uc008rhg.2	Zgrf1	113.8	1.74765e-09	2.13235e-07	up	UCSC_knowngene	8088	chr3:127553502-127618023+	exon sense-overlapping	NM_197997	Zgrf1	chr3:127553489-127618023+
chr19	55742861	55743197	diffreps_peak_00070609	7.68884	336	ENSMUST00000133008	Tcf7l2	4.89606	2.04718e-08	1.09817e-06	up	Ensembl	691	chr19:55742845-55910681+	exon sense-overlapping	NM_001142918	Tcf7l2	chr19:55741810-55933655+
chr10	128249520	128249860	diffreps_peak_00016439	6.50906	340	ENSMUST00000136854	Timeless	3.72414	3.097e-07	8.40176e-06	up	Ensembl	560	chr10:128249213-128249860+	exon sense-overlapping	NM_001164081	Timeless	chr10:128232063-128252941+
chr9	109094601	109095060	diffreps_peak_00144346	5.9026	459	ENSMUST00000134690	Gm7628	3.66034	1.25142e-06	2.62415e-05	up	Ensembl	2010	chr9:109093844-109097796-	natural antisense	ENSMUST00000072093	Plxnb1	chr9:109095436-109119911+
chr5	115544113	115544569	diffreps_peak_00106070	6.88775	456	ENSMUST00000134198	Pxn	2.75982	1.29493e-07	4.23162e-06	up	Ensembl	524	chr5:115544114-115544948+	exon sense-overlapping	ENSMUST00000067268	Pxn	chr5:115506676-115555987+
chr6	42267221	42267580	diffreps_peak_00112386	6.08739	359	ENSMUST00000139930	Casp2	4.43149	8.17729e-07	1.84416e-05	up	Ensembl	3325	chr6:42265056-42269122+	exon sense-overlapping	NM_007610	Casp2	chr6:42264985-42282508+
chr2	91260961	91261406	diffreps_peak_00076025	9.49127	445	ENSMUST00000126754	Pacsin3	2.13311	3.2265e-10	5.93246e-08	up	Ensembl	761	chr2:91260805-91261669+	exon sense-overlapping	ENSMUST00000168916	Pacsin3	chr2:91256813-91264679+
chr2	51960301	51960660	diffreps_peak_00074419	5.86748	359	ENSMUST00000123521	Nmi	2.94189	1.35683e-06	2.804e-05	up	Ensembl	487	chr2:51960236-51972970-	exon sense-overlapping	NM_001141948	Nmi	chr2:51948499-51973208-
chr16	35662470	35662898	diffreps_peak_00052842	6.5815	428	ENSMUST00000128966	Sema5b	2.9541	2.62117e-07	7.36676e-06	up	Ensembl	766	chr16:35662471-35663454+	exon sense-overlapping	NM_013661	Sema5b	chr16:35541362-35664258+
chrX	74022632	74023197	diffreps_peak_00146930	10.9874	565	ENSMUST00000146210	Irak1	2.44874	1.0294e-11	5.19657e-09	up	Ensembl	576	chrX:74022633-74023376-	exon sense-overlapping	ENSMUST00000114353	Irak1	chrX:74015440-74023745-
chrX	74022632	74023197	diffreps_peak_00146930	10.9874	565	ENSMUST00000146210	Irak1	2.44874	1.0294e-11	5.19657e-09	up	Ensembl	576	chrX:74022633-74023376-	exon sense-overlapping	NM_001177976	Irak1	chrX:74013914-74023921-
chr18	73863630	73864220	diffreps_peak_00065994	11.3138	590	ENSMUST00000139821	Mro	3.32929	4.85488e-12	3.42765e-09	up	Ensembl	1877	chr18:73863631-73870209+	exon sense-overlapping	NM_027741	Mro	chr18:73859387-73879134+
chr4	148144861	148145196	diffreps_peak_00098396	5.73334	335	ENSMUST00000105708	Mad2l2	2.47125	1.84781e-06	3.63608e-05	up	Ensembl	487	chr4:148144790-148145451+	exon sense-overlapping	ENSMUST00000140049	Mad2l2	chr4:148140724-148145120+
chr8	122483241	122483620	diffreps_peak_00136528	12.3648	379	ENSMUST00000123671	Piezo1	3.85767	4.31754e-13	1.00772e-09	up	Ensembl	2860	chr8:122481721-122484780-	natural antisense	ENSMUST00000116412	Ctu2	chr8:122476143-122483092+
chr8	25675441	25675742	diffreps_peak_00130588	7.07686	301	uc009lgo.1	Whsc1l1	3.65759	8.37791e-08	3.04583e-06	up	UCSC_knowngene	2577	chr8:25674436-25677972+	exon sense-overlapping	ENSMUST00000146919	Whsc1l1	chr8:25602284-25677972+
chr19	55742861	55743197	diffreps_peak_00070609	7.68884	336	ENSMUST00000133008	Tcf7l2	4.89606	2.04718e-08	1.09817e-06	up	Ensembl	691	chr19:55742845-55910681+	exon sense-overlapping	ENSMUST00000127233	Tcf7l2	chr19:55742364-55933231+
chr4	43631538	43631851	diffreps_peak_00091128	7.72356	313	ENSMUST00000137535	Gm12473	3.47411	1.8899e-08	1.04122e-06	up	Ensembl	579	chr4:43631539-43641533-	natural antisense	NM_173788	Npr2	chr4:43631935-43651240+
chr4	128499241	128499720	diffreps_peak_00095889	5.42868	479	ENSMUST00000148247	Csmd2	3.19303	3.72669e-06	6.56029e-05	up	Ensembl	3320	chr4:128477154-128501177+	exon sense-overlapping	ENSMUST00000184063	Csmd2	chr4:128058962-128567656+
chr15	102710224	102710530	diffreps_peak_00049988	9.81604	306	ENSMUST00000166943	Calcoco1	2.04914	1.52743e-10	3.34101e-08	up	Ensembl	863	chr15:102710225-102715796-	exon sense-overlapping	NM_026192	Calcoco1	chr15:102706777-102722178-
chr7	29331103	29331420	diffreps_peak_00120585	8.44003	317	ENSMUST00000183164	Sipa1l3	4.11946	3.63057e-09	3.44135e-07	up	Ensembl	712	chr7:29331104-29339063-	exon sense-overlapping	ENSMUST00000182484	Sipa1l3	chr7:29322122-29367818-
chr1	45389101	45389700	diffreps_peak_00001854	7.33335	599	ENSMUST00000150143	Col5a2	8.94591	4.64144e-08	1.97348e-06	up	Ensembl	2951	chr1:45389031-45393634-	exon sense-overlapping	NM_007737	Col5a2	chr1:45374331-45503282-
chr8	45736921	45737380	diffreps_peak_00131274	5.2886	459	ENSMUST00000136119	Sorbs2	4.4209	5.1452e-06	8.61843e-05	up	Ensembl	6425	chr8:45658784-45742419+	exon sense-overlapping	ENSMUST00000098788	Sorbs2	chr8:45507788-45804892+
chr12	111795351	111795678	diffreps_peak_00032783	7.19695	327	ENSMUST00000141435	Klc1	2.95382	6.35405e-08	2.47127e-06	up	Ensembl	806	chr12:111795352-111806726+	intronic antisense	ENSMUST00000021715	Xrcc3	chr12:111803193-111813841-
chr6	42267221	42267580	diffreps_peak_00112386	6.08739	359	ENSMUST00000139930	Casp2	4.43149	8.17729e-07	1.84416e-05	up	Ensembl	3325	chr6:42265056-42269122+	exon sense-overlapping	ENSMUST00000031895	Casp2	chr6:42264985-42282508+
chr2	51960301	51960660	diffreps_peak_00074419	5.86748	359	ENSMUST00000123521	Nmi	2.94189	1.35683e-06	2.804e-05	up	Ensembl	487	chr2:51960236-51972970-	exon sense-overlapping	ENSMUST00000112705	Nmi	chr2:51948505-51973016-
chr10	80342361	80342740	diffreps_peak_00013301	5.52767	379	NR_104339	Adamtsl5	5.45	2.96706e-06	5.41528e-05	up	RefSeq	3559	chr10:80339793-80348448-	exon sense-overlapping	NM_001285435	Adamtsl5	chr10:80339793-80348448-
chr11	90657501	90657840	diffreps_peak_00023161	6.71736	339	ENSMUST00000147329	Tom1l1	3.80105	1.91706e-07	5.77043e-06	up	Ensembl	2694	chr11:90657072-90663312-	exon sense-overlapping	ENSMUST00000107868	Tom1l1	chr11:90645691-90687601-
chrX	74022632	74023197	diffreps_peak_00146930	10.9874	565	ENSMUST00000146210	Irak1	2.44874	1.0294e-11	5.19657e-09	up	Ensembl	576	chrX:74022633-74023376-	exon sense-overlapping	ENSMUST00000068286	Irak1	chrX:74013926-74023915-
chr10	128249520	128249860	diffreps_peak_00016439	6.50906	340	ENSMUST00000136854	Timeless	3.72414	3.097e-07	8.40176e-06	up	Ensembl	560	chr10:128249213-128249860+	exon sense-overlapping	ENSMUST00000105244	Timeless	chr10:128232089-128252852+
chr4	43631538	43631851	diffreps_peak_00091128	7.72356	313	ENSMUST00000137535	Gm12473	3.47411	1.8899e-08	1.04122e-06	up	Ensembl	579	chr4:43631539-43641533-	natural antisense	ENSMUST00000107874	Npr2	chr4:43632185-43651244+
chr8	122483241	122483620	diffreps_peak_00136528	12.3648	379	ENSMUST00000123671	Piezo1	3.85767	4.31754e-13	1.00772e-09	up	Ensembl	2860	chr8:122481721-122484780-	natural antisense	ENSMUST00000136253	Ctu2	chr8:122480957-122481744+
chr5	151072801	151073120	diffreps_peak_00110385	7.21479	319	ENSMUST00000146814	Stard13	4.53559	6.09825e-08	2.39627e-06	up	Ensembl	2480	chr5:151071264-151190150-	exon sense-overlapping	NM_146258	Stard13	chr5:151037515-151190193-
chr19	6126701	6127060	diffreps_peak_00067535	5.92042	359	uc008ghn.1	AK045837	7.62025	1.20111e-06	2.53363e-05	up	UCSC_knowngene	3077	chr19:6125103-6128179-	exon sense-overlapping	ENSMUST00000138931	Snx15	chr19:6121927-6128165-
chr3	95009081	95009600	diffreps_peak_00086203	5.14961	519	ENSMUST00000146169	Zfp687	2.5677	7.08578e-06	0.000113067	up	Ensembl	4930	chr3:95006590-95011807-	exon sense-overlapping	NM_030074	Zfp687	chr3:95006702-95015238-
chr2	155818421	155818800	diffreps_peak_00079864	7.19212	379	NR_015528	BC029722	2.97954	6.42504e-08	2.49072e-06	up	RefSeq	1403	chr2:155817732-155819203-	natural antisense	ENSMUST00000029141	Mmp24	chr2:155775342-155818366+
chr1	9574901	9575649	diffreps_peak_00000172	5.79863	748	ENSMUST00000121942	Gm6161	6.22232	1.58991e-06	3.21044e-05	up	Ensembl	1102	chr1:9574548-9575649+	intronic antisense	ENSMUST00000115480	2610203C22Rik	chr1:9560832-9631092-
chr12	111795351	111795678	diffreps_peak_00032783	7.19695	327	ENSMUST00000141435	Klc1	2.95382	6.35405e-08	2.47127e-06	up	Ensembl	806	chr12:111795352-111806726+	exon sense-overlapping	NM_001025362	Klc1	chr12:111758868-111807844+
chr2	181898201	181898540	diffreps_peak_00082460	5.07607	339	ENSMUST00000119395	Gm5466	58.1	8.39324e-06	0.000130835	up	Ensembl	1890	chr2:181896823-181898712+	intergenic	NA	NA	NA
chr2	119812059	119812420	diffreps_peak_00077406	5.79975	361	ENSMUST00000147761	Tyro3	3.57246	1.5858e-06	3.20312e-05	up	Ensembl	3529	chr2:119809208-119818091+	exon sense-overlapping	ENSMUST00000028763	Tyro3	chr2:119799514-119818104+
chr1	156063321	156063694	diffreps_peak_00006685	11.0204	373	ENSMUST00000125371	Tor1aip2	4.28531	9.54107e-12	5.0076e-09	up	Ensembl	624	chr1:156063213-156064842+	exon sense-overlapping	NM_172843	Tor1aip2	chr1:156035664-156068859+
chr7	127979181	127979620	diffreps_peak_00127631	7.95361	439	uc009jxs.1	AK134717	2.37481	1.11273e-08	7.34634e-07	up	UCSC_knowngene	1514	chr7:127978141-127979654+	exon sense-overlapping	ENSMUST00000077609	Fus	chr7:127967490-127982032+
chr9	85843441	85843780	diffreps_peak_00142775	8.74545	339	uc009qwy.1	AK162386	2.36918	1.79703e-09	2.1752e-07	up	UCSC_knowngene	2334	chr9:85820241-85844131-	natural antisense	ENSMUST00000098500	Tpbg	chr9:85842852-85847055+
chr11	55409641	55409997	diffreps_peak_00019495	5.8086	356	ENSMUST00000125787	Sparc	2.21893	1.55383e-06	3.14495e-05	up	Ensembl	907	chr11:55409204-55419900-	exon sense-overlapping	NM_001290817	Sparc	chr11:55394159-55420080-
chr8	14925049	14925420	diffreps_peak_00129934	7.21464	371	ENSMUST00000160619	Arhgef10	2.15055	6.10041e-08	2.39658e-06	up	Ensembl	3289	chr8:14911717-14928291+	exon sense-overlapping	NM_001037736	Arhgef10	chr8:14911663-15001085+
