# Supplementary material for: The landscape of m1A modification and its posttranscriptional regulatory functions in primary neurons
Source: eLife. 2023 Mar 7;12:e85324. doi: 10.7554/eLife.85324 (PMC9991057; doi:10.7554/eLife.85324)
Supplement: Figure 4—source data 1. [file elife-85324-fig4-data1.xlsx]

## Sheet: Control-m1A_circRNA
Chromosome	Transcript start	Transcript end	Peak ID	Score	Peak length	circRNA	P value (-log10)	Fold enrichment	FDR	circBaseID	Source	Best transcript	Gene name	Catalog	Predicted sequence length
chr1	162710091	162710424	MACS_peak_10820	3100	333	chr1:162672608-162710424-	3100	21.1	11.62	NA	novel	NM_001081290	Prrc2c	sense overlapping	37817
chr1	178335704	178337073	MACS_peak_12004	3100	1369	chr1:178332997-178337073-	3100	18.9	11.62	NA	novel	NM_016805	Hnrnpu	sense overlapping	4077
chr1	181923734	181924022	MACS_peak_12481	3100	288	chr1:181923735-181930729-	3100	19.43	11.62	NA	novel	NM_008680	Enah	sense overlapping	6995
chr11	75751998	75752655	MACS_peak_29469	3100	657	chr11:75751999-75755615+	3100	11.57	11.62	NA	novel	NM_009536	Ywhae	sense overlapping	3617
chr12	29811372	29811734	MACS_peak_37155	3100	362	chr12:29811373-29827831+	3100	53.46	11.62	12_30512696_30496238_-16458|13.72|2|3	PMID:25714049	NM_008666	Myt1l	exonic	1328
chr13	103751764	103753343	MACS_peak_51027	3100	1579	chr13:103743635-103764419-	3100	15.71	11.62	NA	novel	NM_172592	Srek1	sense overlapping	20785
chr14	75323030	75324803	MACS_peak_58227	3100	1773	chr14:75291569-75339489+	3100	15.42	11.62	NA	novel	NM_026083	Zc3h13	sense overlapping	47921
chr17	56566577	56566963	MACS_peak_81544	3100	386	chr17:56566578-56566963-	3100	14.66	11.62	NA	novel	ENSMUST00000156640	Safb2	intronic	386
chr18	75521376	75521869	MACS_peak_90148	3100	493	chr18:75519739-75521869-	3100	21.14	11.62	18_75681523_75679393_-2130|17.53|14|123	PMID:25714049	NM_201354	Ctif	exonic	862
chr3	28564074	28564250	MACS_peak_112740	3100	176	chr3:28493967-28564250+	3100	13.9	11.62	NA	novel	NM_026910	Tnik	exonic	826
chr4	32756415	32756714	MACS_peak_122725	3100	299	chr4:32756416-32757906+	3100	34.85	11.62	NA	novel	ENSMUST00000125323	Mdn1	intronic	1491
chr4	109013509	109013840	MACS_peak_128712	3100	331	chr4:109013510-109024277+	3100	14.95	11.62	4_108696882_108686115_-10767|14.68|3|4	PMID:25714049	NM_146150	Nrd1	exonic	641
chr4	133720549	133720999	MACS_peak_131413	3100	450	chr4:133719537-133723051-	3100	11.39	11.62	mmu_circ_0001283	circBase	NM_001080819	Arid1a	exonic	780
chr5	104092377	104093373	MACS_peak_141917	3100	996	chr5:104090392-104093373-	3100	8.78	11.62	NA	novel	NM_010097	Sparcl1	exonic	1066
chr6	125123997	125124102	MACS_peak_157641	3100	105	chr6:125123998-125124328+	3100	19	11.62	NA	novel	ENSMUST00000056889	Chd4	intronic	331
chrY	90736913	90740700	MACS_peak_199186	3100	3787	chrY:90736914-90819638+	3100	37.42	11.62	NA	novel	NM_133362	Erdr1	sense overlapping	82725
chr10	25501823	25502387	MACS_peak_12793	3100	564	chr10:25479009-25507857+	3100	16.29	12.9	NA	novel	NM_013511	Epb4.1l2	exonic	1644
chr9	73011977	73012157	MACS_peak_189157	2983.9	180	chr9:73011978-73012157+	2983.9	11.56	11.73	NA	novel	NM_028181	Ccpg1	sense overlapping	180
chr5	14668964	14669675	MACS_peak_134914	2732.41	711	chr5:14668965-14669675+	2732.41	6.26	11.39	5_14669675_14668965_-710|20.39|2|2	PMID:25714049	NM_011995	Pclo	exonic	711
chr4	150406195	150406857	MACS_peak_133375	2720.85	662	chr4:150406196-150417300+	2720.85	12.3	11.36	4_149791409_149780305_-11104|17.36|2|2	PMID:25714049	NM_001085492	Rere	sense overlapping	11105
chr9	49564868	49565041	MACS_peak_186625	2470.94	173	chr9:49543011-49569900-	2470.94	11.74	11.46	9_49378005_49351116_-26889|22.99|2|2	PMID:25714049	NM_010875	Ncam1	exonic	1746
chr5	100408033	100408113	MACS_peak_141576	2365.59	80	chr5:100378828-100408113-	2365.59	12.95	11.2	NA	novel	NM_026969	Sec31a	exonic	2500
chr9	65794489	65795495	MACS_peak_162365	2347.21	1006	chr9:65786582-65795495-	2347.21	10.6	12.67	NA	novel	NM_172536	Zfp609	sense overlapping	8914
chr12	71067245	71067768	MACS_peak_39587	2257.46	523	chr12:71067246-71069918+	2257.46	17.01	11.12	NA	novel	NM_001081195	Arid4a	sense overlapping	2673
chr6	149531290	149531486	MACS_peak_159350	2008.06	196	chr6:149531291-149531486+	2008.06	32.26	11.44	NA	novel	ENSMUST00000003544	Bicd1	intronic	196
chr2	59920294	59920538	MACS_peak_100829	1884.96	244	chr2:59907439-59932170-	1884.96	16.65	11.5	2_59770227_59745496_-24731|17.61|8|27	PMID:25714049	NM_001001182	Baz2b	exonic	2765
chr1	34199291	34199558	MACS_peak_2083	1772.75	267	chr1:34197201-34249638+	1772.75	6.93	11.48	NA	novel	NM_133833	Dst	exonic	5742
chr18	5772434	5773094	MACS_peak_72845	1744.5	660	chr18:5705043-5773094+	1744.5	9.99	12.9	18_5773092_5705041_-68051|13.10|7|16	PMID:25714049	NM_011546	Zeb1	sense overlapping	68052
chr12	85028769	85030887	MACS_peak_41286	1743.96	2118	chr12:85028770-85034034+	1743.96	8.86	11.47	mmu_circ_0000402	circBase	NM_178363	Ylpm1	exonic	2236
chr15	30669235	30670004	MACS_peak_62418	1670.85	769	chr15:30634644-30698644+	1670.85	6.08	11.43	NA	novel	NM_008729	Ctnnd2	sense overlapping	64001
chr5	117554960	117555477	MACS_peak_143636	1583.39	517	chr5:117554961-117555477+	1583.39	12.69	11.66	5_118005486_118004970_-516|16.90|3|3	PMID:25714049	NM_001114545	Ksr2	exonic	517
chr10	59092669	59092915	MACS_peak_17177	1556.12	246	chr10:59092670-59092915+	1556.12	34.04	11.71	NA	novel	ENSMUST00000148267	Sh3rf3	intronic	246
chr7	99345717	99345890	MACS_peak_143797	1468.11	173	chr7:99345718-99345890-	1468.11	16.25	14.76	NA	novel	NM_009825	Serpinh1	sense overlapping	173
chr17	70190678	70190700	MACS_peak_82470	1439.51	22	chr17:70190679-70190834+	1439.51	17.34	11.9	NA	novel	ENSMUST00000060072	Dlgap1	intronic	156
chr12	3865786	3866705	MACS_peak_30784	1312.08	919	chr12:3829944-3873428+	1312.08	9.91	14.97	NA	novel	NM_007872	Dnmt3a	sense overlapping	43485
chr19	28546135	28546791	MACS_peak_93038	1228.64	656	chr19:28530873-28548423-	1228.64	32.62	12.02	NA	novel	NM_175459	Glis3	sense overlapping	17551
chr4	132006957	132007438	MACS_peak_131130	1193.71	481	chr4:131967788-132007438-	1193.71	5.87	12.17	NA	novel	NM_183428	Epb4.1	exonic	1834
chr4	138125809	138126634	MACS_peak_100463	1117.07	825	chr4:138120346-138126634+	1117.07	6.16	14.8	4_137682549_137676261_-6288|13.45|1|2	PMID:25714049	NM_172703	Eif4g3	exonic	934
chr3	127093538	127094928	MACS_peak_118979	1094.51	1390	chr3:127093539-127094928-	1094.51	15.58	12.59	NA	novel	ENSMUST00000182008	Ank2	intronic	1390
chr2	29220856	29222227	MACS_peak_98168	1075.15	1371	chr2:29207418-29248878-	1075.15	25.5	12.47	NA	novel	NM_133500	Ntng2	sense overlapping	41461
chr3	84903500	84904079	MACS_peak_99380	1065.34	579	chr3:84863964-84904079+	1065.34	10.96	17.4	3_84708001_84667886_-40115|17.73|21|64	PMID:25714049	NM_001177773	Fbxw7	exonic	691
chr8	48417007	48417245	MACS_peak_175214	1026.51	238	chr8:48367311-48417245-	1026.51	9.87	12.71	8_49502599_49452665_-49934|22.29|17|72	PMID:25714049	NM_011857	Tenm3	exonic	600
chr11	77199762	77200153	MACS_peak_25539	855.8	391	chr11:77113608-77200153-	855.8	32.31	17.97	11_77013655_76927110_-86545|19.12|2|4	PMID:25714049	NM_176965	Efcab5	sense overlapping	86546
chr15	82169737	82170154	MACS_peak_56750	755.06	417	chr15:82169738-82182257+	755.06	7.03	19.17	NA	novel	NM_033218	Srebf2	exonic	1917
chr5	121797318	121798260	MACS_peak_110211	751.52	942	chr5:121797319-121802265+	751.52	7.16	18.84	NA	novel	NM_009125	Atxn2	sense overlapping	4947
chr2	165812348	165812858	MACS_peak_109762	736.93	510	chr2:165791905-165875775-	736.93	7.34	14.11	NA	novel	NM_027230	Zmynd8	exonic	3521
chr5	110755396	110756766	MACS_peak_108751	736.08	1370	chr5:110719087-110756766-	736.08	4.93	18.9	5_111185785_111148106_-37679|19.68|2|2	PMID:25714049	NM_029337	Ep400	exonic	3333
chr3	75894834	75895137	MACS_peak_115522	732.7	303	chr3:75894835-75898132-	732.7	18.65	14.19	mmu_circ_0010789	circBase	NM_175193	Golim4	exonic	465
chr11	6147599	6148480	MACS_peak_23945	685.74	881	chr11:6113243-6150835-	685.74	16.38	14.68	NA	novel	NM_173748	Nudcd3	sense overlapping	37593
chr2	161041984	161042132	MACS_peak_93671	676.44	148	chr2:161039194-161042132-	676.44	16.83	20.1	mmu_circ_0009540	circBase	NM_173368	Chd6	exonic	298
chr11	101295294	101295610	MACS_peak_28023	656.31	316	chr11:101295295-101295610-	656.31	11.99	20.37	NA	novel	ENSMUST00000129863	Becn1	intronic	316
chr14	32526148	32526878	MACS_peak_55098	638.81	730	chr14:32518943-32541354+	638.81	11.11	15.11	NA	novel	NM_001081221	Ercc6	exonic	1092
chr16	17655677	17655805	MACS_peak_70598	622.86	128	chr16:17655444-17663496-	622.86	5.89	15.37	NA	novel	NM_033609	Med15	exonic	376
chr6	83402666	83404824	MACS_peak_132001	612.91	2158	chr6:83402667-83404824-	612.91	5.21	21.05	6_83354818_83352661_-2157|23.66|10|22	PMID:25714049	NM_183138	Tet3	exonic	2158
chr7	25290372	25290612	MACS_peak_138049	607.44	240	chr7:25289544-25290612+	607.44	5.72	21.16	NA	novel	NM_027882	Cic	sense overlapping	1069
chr18	54865831	54866500	MACS_peak_88215	604.05	669	chr18:54802617-54900300-	604.05	21.77	15.91	NA	novel	NM_175751	Zfp608	sense overlapping	97684
chr4	104599079	104599254	MACS_peak_109767	590.64	175	chr4:104599080-104599254+	590.64	19.7	21.55	NA	novel	ENSMUST00000106826	Dab1	intronic	175
chr5	28358273	28358482	MACS_peak_117213	588.16	209	chr5:28331111-28362234+	588.16	10.74	21.47	mmu_circ_0012501	circBase	NM_028234	Rbm33	exonic	1308
chr1	56871311	56871784	MACS_peak_3017	587.38	473	chr1:56831439-56871784-	587.38	5.52	21.42	mmu_circ_0008810	circBase	NM_139146	Satb2	exonic	1040
chr12	34373877	34374138	MACS_peak_37550	576.5	261	chr12:34303173-34374138-	576.5	11.11	16.29	mmu_circ_0003917	circBase	NM_001271386	Hdac9	exonic	573
chr18	79086550	79087334	MACS_peak_90600	554.71	784	chr18:79086551-79102662-	554.71	6.31	16.6	NA	novel	NM_053099	Setbp1	sense overlapping	16112
chr14	26459903	26460174	MACS_peak_54130	535.62	271	chr14:26459904-26460174-	535.62	8.53	16.94	NA	novel	NM_032008	Slmap	sense overlapping	271
chr10	42828746	42829039	MACS_peak_16240	517.76	293	chr10:42783442-42829039+	517.76	13.05	17.23	10_42548845_42503248_-45597|19.00|12|29	PMID:25714049	NM_153055	Sec63	sense overlapping	45598
chr18	36575018	36575169	MACS_peak_86737	498.68	151	chr18:36575019-36581215+	498.68	9.11	17.43	18_36740869_36734673_-6196|15.10|5|6	PMID:25714049	NM_175375	Ankhd1	exonic	456
chr11	78009400	78009794	MACS_peak_25682	484.88	394	chr11:78006727-78009794+	484.88	7.33	23.81	mmu_circ_0000298	circBase	NM_174852	Phf12	exonic	467
chr1	13221306	13221479	MACS_peak_651	484.16	173	chr1:13221307-13224713-	484.16	7.26	17.76	mmu_circ_0000010	circBase	NM_008678	Ncoa2	exonic	278
chr7	61202606	61202989	MACS_peak_163597	474.75	383	chr7:61194987-61202989-	474.75	7.82	18.07	7_68347875_68339873_-8002|14.02|12|76	PMID:25714049	uc009hex.1	DOKist4	exonic	586
chrX	160833867	160834834	MACS_peak_151580	464.63	967	chrX:160808475-160847017-	464.63	4.27	24.07	NA	novel	NM_001024624	Cdkl5	exonic	1969
chrX	69544408	69545269	MACS_peak_195213	461.73	861	chrX:69523436-69545269+	461.73	11.08	18.13	X_66798444_66776611_-21833|16.61|2|2	PMID:25714049	NM_008032	Aff2	exonic	994
chr11	53402477	53402566	MACS_peak_27158	443.92	89	chr11:53399589-53406675+	443.92	5.17	18.48	NA	novel	NM_033565	Aff4	exonic	1349
chr4	8751323	8753148	MACS_peak_92416	442.78	1825	chr4:8751324-8753148+	442.78	4.44	24.62	4_8680295_8678471_-1824|20.33|6|12	PMID:25714049	NM_001277149	Chd7	exonic	1825
chr11	74836364	74837723	MACS_peak_22217	413.15	1359	chr11:74836365-74837723+	413.15	6.36	25.61	NA	novel	NM_010813	Mnt	sense overlapping	1359
chr5	99962320	99962581	MACS_peak_141509	405.18	261	chr5:99961293-99962581-	405.18	6.33	19.12	NA	novel	NM_007516	Hnrnpd	sense overlapping	1289
chr5	51494600	51494805	MACS_peak_105739	391.21	205	chr5:51490017-51498228-	391.21	15.72	26.38	mmu_circ_0012681	circBase	NM_008904	Ppargc1a	exonic	646
chr1	168352487	168352648	MACS_peak_9545	382.74	161	chr1:168352488-168352648-	382.74	15.27	26.19	NA	novel	ENSMUST00000176309	Pbx1	intronic	161
chr11	75139192	75139369	MACS_peak_29335	378.83	177	chr11:75139193-75156314+	378.83	10.93	19.81	NA	novel	NM_001002764	Smg6	exonic	478
chr18	31674354	31674496	MACS_peak_86159	370.95	142	chr18:31653502-31677477+	370.95	9.39	19.91	NA	novel	NM_172965	Sap130	exonic	733
chr8	79356211	79356469	MACS_peak_177433	366.11	258	chr8:79343654-79356469-	366.11	6.73	19.89	8_81880368_81867553_-12815|19.84|3|3	PMID:25714049	NM_008539	Smad1	exonic	854
chr9	31325626	31325943	MACS_peak_141186	364.04	317	chr9:31325627-31337422+	364.04	7.64	27.24	NA	novel	NM_001080817	Prdm10	sense overlapping	11796
chr10	43020803	43021331	MACS_peak_13926	334.45	528	chr10:43004078-43021331-	334.45	7.31	27.9	NA	novel	NM_175407	Sobp	sense overlapping	17254
chr7	49545799	49546091	MACS_peak_124437	322.99	292	chr7:49535894-49548541+	322.99	7.42	29.3	NA	novel	NM_175272	Nav2	exonic	1134
chr5	146468258	146468435	MACS_peak_127172	318.9	177	chr5:146468259-146468435+	318.9	6.17	28.54	NA	novel	NM_145155	Wasf3	sense overlapping	177
chr18	6479811	6480837	MACS_peak_84676	318.69	1026	chr18:6467056-6493578-	318.69	4.81	21.54	NA	novel	ENSMUST00000115870	Epc1	intronic	26523
chr1	38498659	38500004	MACS_peak_2577	308.05	1345	chr1:38497062-38539001-	308.05	10.46	21.91	NA	novel	NM_001290814	Aff3	sense overlapping	41940
chr9	45871870	45871967	MACS_peak_186268	307.77	97	chr9:45866566-45900256-	307.77	5.24	21.91	9_45708339_45674649_-33690|17.06|3|4	PMID:25714049	NM_178709	Rnf214	exonic	1834
chr10	62838175	62840378	MACS_peak_17602	307.27	2203	chr10:62832894-62840378-	307.27	7.46	21.97	10_62303126_62295642_-7484|19.94|16|78	PMID:25714049	NM_027384	Tet1	exonic	2388
chr1	183135354	183135876	MACS_peak_9456	306.59	522	chr1:183135355-183135876-	306.59	13.48	29.55	NA	novel	NM_026866	Disp1	exonic	522
chr4	128794850	128794976	MACS_peak_130743	306.52	126	chr4:128785970-128794976-	306.52	12.2	21.97	4_128472220_128463214_-9006|12.26|7|11	PMID:25714049	NM_001081098	Zfp362	exonic	990
chr11	107670034	107671682	MACS_peak_25572	299.83	1648	chr11:107670035-107686862+	299.83	9.84	29.87	NA	novel	NM_198298	Helz	sense overlapping	16828
chr10	7924684	7924872	MACS_peak_11789	286.68	188	chr10:7919114-7924872-	286.68	16.78	29.84	10_7644670_7638912_-5758|19.49|2|4	PMID:25714049	NM_138667	Tab2	exonic	1689
chr2	9951113	9952945	MACS_peak_83169	281.02	1832	chr2:9940927-9952945-	281.02	8.65	30.07	2_9874572_9862554_-12018|18.79|3|4	PMID:25714049	NM_027748	Taf3	exonic	1915
chr6	134233518	134233653	MACS_peak_158050	276.33	135	chr6:134137285-134233653+	276.33	16.99	22.96	NA	novel	NM_007961	Etv6	exonic	433
chr9	80087429	80087523	MACS_peak_163382	270.38	94	chr9:80087430-80092412+	270.38	7.32	30.56	9_79940219_79935237_-4982|13.79|8|10	PMID:25714049	NM_146003	Senp6	exonic	298
chr13	93441014	93441621	MACS_peak_50316	252.4	607	chr13:93439439-93442681-	252.4	6.92	23.99	13_94212636_94209394_-3242|16.21|2|2	PMID:25714049	NM_021310	Jmy	exonic	1014
chr10	14012431	14014539	MACS_peak_14445	252.27	2108	chr10:14004198-14066684+	252.27	15.28	23.99	mmu_circ_0002087	circBase	NM_010437	Hivep2	sense overlapping	62487
chr9	45701808	45702008	MACS_peak_186204	250.65	200	chr9:45701809-45702656+	250.65	9.25	24.05	9_45510739_45509892_-847|19.31|1|2	PMID:25714049	NM_001081270	Dscaml1	exonic	426
chr4	118269020	118269317	MACS_peak_110749	250.37	297	chr4:118257612-118269317-	250.37	4.15	32.13	NA	novel	NM_011213	Ptprf	sense overlapping	11706
chr15	34999830	34999956	MACS_peak_53605	236.89	126	chr15:34945006-35008298-	236.89	6.54	32.44	15_34938053_34874761_-63292|14.46|2|2	PMID:25714049	NM_019635	Stk3	exonic	651
chr8	61349399	61349702	MACS_peak_134439	236.88	303	chr8:61349400-61353848+	236.88	7.96	33.89	8_63832645_63828197_-4448|18.22|2|3	PMID:25714049	NM_021506	Sh3rf1	exonic	414
chr12	69322100	69322350	MACS_peak_39366	235.2	250	chr12:69318027-69322350-	235.2	5.37	24.81	NA	novel	NM_025441	Nemf	exonic	497
chr11	107046999	107047542	MACS_peak_25428	228.7	543	chr11:107047000-107085373-	228.7	6.93	34.89	NA	novel	NM_176850	Bptf	sense overlapping	38374
chr2	104208081	104208206	MACS_peak_103842	228.4	125	chr2:104192435-104214275-	228.4	4.9	25.27	2_104054432_104032592_-21840|18.91|13|66	PMID:25714049	NM_001033347	D430041D05Rik	exonic	837
chr6	85347779	85348455	MACS_peak_132227	222.95	676	chr6:85347780-85348991-	222.95	6.91	33.23	6_85298985_85297774_-1211|21.94|15|34	PMID:25714049	NM_177466	Rab11fip5	exonic	1113
chr18	22374935	22375383	MACS_peak_65117	221.31	448	chr18:22366612-22434675+	221.31	10.85	35.67	18_22593176_22525113_-68063|19.77|5|5	PMID:25714049	NM_001167777	Asxl3	sense overlapping	68064
chr5	147484994	147485396	MACS_peak_147745	217.36	402	chr5:147450653-147503202+	217.36	10.32	25.75	5_148314778_148262229_-52549|11.54|11|19	PMID:25714049	NM_028291	Pan3	sense overlapping	52550
chr10	69958917	69959508	MACS_peak_13480	216.88	591	chr10:69958918-69980394-	216.88	5.29	36.22	NA	novel	NM_009670	Ank3	antisense	21477
chr7	126120356	126120437	MACS_peak_145986	208.19	81	chr7:126120357-126153279-	208.19	6.59	33.95	NA	novel	NM_028816	Xpo6	exonic	1213
chr13	59504193	59504310	MACS_peak_48469	202.66	117	chr13:59460469-59504310-	202.66	4.28	26.39	13_59605671_59561830_-43841|11.44|7|9	PMID:25714049	NM_023328	Agtpbp1	exonic	2294
chr6	119920806	119921028	MACS_peak_157240	197.49	222	chr6:119920110-119921028+	197.49	7.09	26.64	mmu_circ_0001516	circBase	NM_011236	Rad52	exonic	303
chr17	27986550	27986652	MACS_peak_60501	190.4	102	chr17:27974905-27988916+	190.4	5.56	38.96	NA	novel	NM_181413	Anks1	exonic	1075
chr15	78987891	78987948	MACS_peak_56264	187.02	57	chr15:78987892-79003792+	187.02	8.66	35.12	NA	novel	NM_138579	Triobp	exonic	1578
chr12	89976346	89976661	MACS_peak_41956	184.17	315	chr12:89976347-89989289+	184.17	7.34	26.95	12_91227729_91214787_-12942|21.06|2|2	PMID:25714049	NM_172544	Nrxn3	sense overlapping	12943
chr2	103775609	103775765	MACS_peak_103809	182.36	156	chr2:103775417-103776157-	182.36	5.42	26.75	2_103616314_103615574_-740|13.47|11|14	PMID:25714049	NM_016739	Caprin1	exonic	405
chr1	187347519	187347880	MACS_peak_10951	180.31	361	chr1:187341487-187348504+	180.31	14.23	35.69	NA	novel	NM_026367	Gpatch2	sense overlapping	7018
chrX	71117480	71119394	MACS_peak_149248	179.95	1914	chrX:71101485-71121468+	179.95	5.17	40.3	mmu_circ_0016337	circBase	NM_001081354	Mamld1	exonic	2184
chr7	62190716	62191201	MACS_peak_163761	175.77	485	chr7:62190717-62193593-	175.77	8.47	27.28	7_69338479_69335603_-2876|17.83|4|4	PMID:25714049	uc009hfe.1	AK086712	exonic	727
chr11	20727442	20727639	MACS_peak_24478	172.19	197	chr11:20725685-20727639-	172.19	6.41	27.22	mmu_circ_0000242	circBase	NM_181411	Aftph	exonic	1955
chr8	70408734	70409011	MACS_peak_152191	171.6	277	chr8:70397746-70409011+	171.6	6.38	35.77	NA	novel	NM_001004062	Crtc1	antisense	11266
chr8	124295357	124295451	MACS_peak_181604	171.5	94	chr8:124295358-124305668+	171.5	5.47	27.2	mmu_circ_0001733	circBase	NM_139272	Galnt2	exonic	248
chr1	84559226	84560211	MACS_peak_4765	169.11	985	chr1:84556566-84577321-	169.11	14.5	35.58	NA	novel	ENSMUST00000049126	Dner	intronic	20756
chr16	43574399	43574624	MACS_peak_63138	168.15	225	chr16:43561713-43577748+	168.15	5.8	35.67	16_43577861_43561826_-16035|15.88|11|42	PMID:25714049	NM_019778	Zbtb20	sense overlapping	16036
chr12	103133151	103133946	MACS_peak_42951	165.84	795	chr12:103122321-103156560+	165.84	11.08	27.42	NA	novel	NM_001081017	Unc79	sense overlapping	34240
chr17	90992114	90992144	MACS_peak_72612	160.07	30	chr17:90991367-90995478-	160.07	3.89	36.59	NA	novel	uc033hfm.1	Nrxn1	exonic	60
chr5	112428470	112428877	MACS_peak_108987	158.24	407	chr5:112428471-112428877-	158.24	7.2	43.67	NA	novel	NM_001253917	Sez6l	intronic	407
chr8	67723396	67724348	MACS_peak_176273	157.48	952	chr8:67696952-67758265-	157.48	8.77	27.87	NA	novel	NM_027626	Psd3	sense overlapping	61314
chr1	63085667	63086398	MACS_peak_3002	153.17	731	chr1:63065704-63086398-	153.17	3.87	44.26	NA	novel	NM_001081436	Ino80d	exonic	1309
chrX	170010673	170011470	MACS_peak_198991	151.76	797	chrX:170010674-170019058+	151.76	8.21	28.41	NA	novel	ENSMUST00000178789	Gm21887	sense overlapping	8385
chr9	78157640	78157952	MACS_peak_144938	150.47	312	chr9:78150529-78160811+	150.47	6.56	44.54	9_78008618_77998336_-10282|18.51|5|7	PMID:25714049	NM_019987	Ick	exonic	1125
chr6	38497817	38498534	MACS_peak_150776	147.45	717	chr6:38440455-38502408+	147.45	7.63	28.5	6_38452408_38390455_-61953|11.84|11|21	PMID:25714049	NM_177185	Ubn2	sense overlapping	61954
chr1	125981382	125981697	MACS_peak_6685	144.77	315	chr1:125981383-125981697-	144.77	10.1	37.33	1_127878274_127877960_-314|18.86|5|9	PMID:25714049	NM_172484	Nckap5	exonic	315
chr1	165911122	165911524	MACS_peak_11022	139.37	402	chr1:165875382-165915163-	139.37	6.59	28.7	NA	novel	NM_011137	Pou2f1	sense overlapping	39782
chr5	148076179	148078558	MACS_peak_113058	137.7	2379	chr5:148076180-148083197+	137.7	5.43	46.67	5_148894773_148887756_-7017|17.66|8|14	PMID:25714049	NM_029920	Mtus2	exonic	2620
chr12	3496060	3497124	MACS_peak_35299	136.46	1064	chr12:3442474-3502368+	136.46	6.98	28.89	12_3502368_3442474_-59894|17.28|4|5	PMID:25714049	NM_172421	Asxl2	sense overlapping	59895
chr12	81204891	81205016	MACS_peak_40595	133.16	125	chr12:81202243-81205016-	133.16	7.09	28.91	12_82306003_82303230_-2773|18.81|1|2	PMID:25714049	NM_080440	Slc8a3	exonic	501
chr5	34348464	34350258	MACS_peak_137167	131.22	1794	chr5:34342522-34351358+	131.22	9.22	29.22	NA	novel	NM_011278	Rnf4	sense overlapping	8837
chr4	120093963	120099450	MACS_peak_129599	127.37	5487	chr4:120093964-120103854+	127.37	6.97	29.56	mmu_circ_0011118	circBase	NM_010657	Hivep3	exonic	5630
chr9	13700754	13701070	MACS_peak_139965	125.6	316	chr9:13697311-13707941+	125.6	8.19	48.15	NA	novel	NM_173776	Maml2	sense overlapping	10631
chr8	80791388	80791614	MACS_peak_177500	115.97	226	chr8:80784627-80800395-	115.97	6.35	29.79	8_83324294_83308526_-15768|17.58|11|16	PMID:25714049	NM_021356	Gab1	exonic	1516
chr19	44947732	44948224	MACS_peak_94435	115.15	492	chr19:44941459-44949139-	115.15	5.89	29.88	NA	novel	NM_001081225	Fam178a	antisense	7681
chr7	68169896	68170048	MACS_peak_141495	111.57	152	chr7:68164993-68173375+	111.57	9.16	37.81	7_75318261_75309879_-8382|15.37|9|16	PMID:25714049	NM_010513	Igf1r	exonic	610
chr9	59431761	59432135	MACS_peak_187627	111.54	374	chr9:59426123-59467864-	111.54	7.59	30.17	NA	novel	NM_019927	Arih1	sense overlapping	41742
chr18	31879707	31879825	MACS_peak_74199	111.36	118	chr18:31878024-31881282+	111.36	7.93	37.81	18_32040936_32037678_-3258|22.67|3|12	PMID:25714049	NM_028866	Wdr33	exonic	472
chr4	102921021	102921519	MACS_peak_96944	108.73	498	chr4:102908808-102934605+	108.73	5.44	50.85	NA	novel	NM_001285852	Sgip1	exonic	1141
chr11	79995744	79995809	MACS_peak_25965	108.4	65	chr11:79995617-79995809+	108.4	7.27	37.21	11_79809311_79809119_-192|16.75|2|2	PMID:25714049	NM_199196	Suz12	exonic	112
chr15	64167699	64167829	MACS_peak_48913	107.97	130	chr15:64149606-64173292-	107.97	5.9	50.93	NA	novel	NM_010026	Asap1	exonic	720
chrX	152622908	152623335	MACS_peak_151325	105.28	427	chrX:152612383-152623335-	105.28	3.58	51.67	X_149057878_149046926_-10952|15.88|4|4	PMID:25714049	NM_172441	Shroom2	sense overlapping	10953
chr1	174608381	174609952	MACS_peak_8734	104.18	1571	chr1:174593061-174612651+	104.18	5.1	51.39	1_176542782_176523192_-19590|17.97|6|7	PMID:25714049	NM_019445	Fmn2	exonic	1772
chr4	124557086	124557470	MACS_peak_111338	94.41	384	chr4:124556045-124586127-	94.41	7.57	38.01	mmu_circ_0001259	circBase	ENSMUST00000184062	RP23-230F2.8	intronic	30083
chr7	44883924	44884118	MACS_peak_123904	92.66	194	chr7:44883204-44884118-	92.66	3.25	53.7	NA	novel	ENSMUST00000003049	Med25	intronic	915
chr11	98694137	98694293	MACS_peak_24561	91.31	156	chr11:98693383-98694293+	91.31	3.41	54.2	11_98555607_98554697_-910|17.53|2|3	PMID:25714049	NM_009439	Psmd3	exonic	495
chr7	37479435	37480849	MACS_peak_161675	90.71	1414	chr7:37479281-37480849-	90.71	7.61	30.53	7_38265868_38264300_-1568|20.30|13|42	PMID:25714049	uc009gkk.1	Zfp536	exonic	1569
chr7	37972579	37972906	MACS_peak_139138	85.36	327	chr7:37959255-37982948-	85.36	8.64	36.92	7_38767967_38744274_-23693|16.40|12|18	PMID:25714049	NM_011274	Uri1	sense overlapping	23694
chr9	122163916	122164051	MACS_peak_166403	82.51	135	chr9:122160323-122164051+	82.51	6.73	37.5	9_122073169_122069441_-3728|13.68|5|8	PMID:25714049	NM_133741	Snrk	exonic	348
chr17	29849156	29849426	MACS_peak_68330	77.69	270	chr17:29849157-29850688-	77.69	6.69	37.01	17_29987633_29986102_-1531|12.93|6|9	PMID:25714049	NM_001081160	Mdga1	exonic	600
chr3	51855498	51857076	MACS_peak_97832	77.48	1578	chr3:51855499-51857076-	77.48	4.86	37.07	mmu_circ_0001126	circBase	NM_001004176	Maml3	exonic	1578
chr4	126900604	126900748	MACS_peak_111707	72.64	144	chr4:126882215-126911284-	72.64	6.68	38.14	4_126588528_126559459_-29069|17.39|9|12	PMID:25714049	NM_001114399	Zmym4	exonic	2618
chr1	66784117	66784351	MACS_peak_3794	70.84	234	chr1:66772906-66802168+	70.84	5.4	36.86	NA	novel	ENSMUST00000118992	Gm15789	sense overlapping	29263
chr16	62813222	62813264	MACS_peak_63778	69.9	42	chr16:62811849-62830813-	69.9	4.01	37.34	16_62830639_62811675_-18964|10.82|12|21	PMID:25714049	NM_026577	Arl13b	exonic	630
chr2	73845438	73845553	MACS_peak_102116	65.9	115	chr2:73842360-73853891-	65.9	3.96	30.77	2_73691948_73680417_-11531|16.42|21|66	PMID:25714049	NM_001025093	Atf2	exonic	726
chr3	88854601	88854795	MACS_peak_88527	65.55	194	chr3:88854602-88863612+	65.55	4.01	57.19	NA	novel	uc008pxb.1	Gon4l	exonic	954
chr9	77229484	77231029	MACS_peak_144876	65.39	1545	chr9:77229485-77231029-	65.39	5.18	57.23	9_77078836_77077292_-1544|17.87|2|2	PMID:25714049	ENSMUST00000183955	Mlip	exonic	1545
chr17	29277856	29277947	MACS_peak_60678	62.54	91	chr17:29277857-29282891+	62.54	5.22	58.2	17_29419836_29414802_-5034|17.10|2|7	PMID:25714049	NM_030561	BC004004	exonic	513
chr17	43064967	43065233	MACS_peak_69208	61.6	266	chr17:43037595-43065233+	61.6	3.67	38.15	NA	novel	NM_178589	Tnfrsf21	exonic	1413
chr1	52708163	52709755	MACS_peak_2289	60.69	1592	chr1:52708164-52709755-	60.69	4.6	59.06	mmu_circ_0000037	circBase	NM_133829	Mfsd6	exonic	1592
chr6	111173048	111173379	MACS_peak_156021	60.36	331	chr6:111172730-111173395+	60.36	6	30.58	NA	novel	ENSMUST00000071076	Grm7	intronic	666
chr8	91015098	91015172	MACS_peak_178467	55.05	74	chr8:90984268-91021869+	55.05	3.54	30.37	8_93545768_93508167_-37601|18.72|8|9	PMID:25714049	NM_177224	Chd9	exonic	2698
chr2	180033501	180034315	MACS_peak_95454	53.97	814	chr2:180032510-180034315+	53.97	4.65	38.9	NA	novel	NM_177727	Lsm14b	sense overlapping	1806
chr19	32804584	32804982	MACS_peak_93519	52.64	398	chr19:32792549-32819920+	52.64	4.38	30.84	NA	novel	NM_008960	Pten	sense overlapping	27372
chr6	37956847	37957755	MACS_peak_129601	52.31	908	chr6:37953494-37957755+	52.31	4.69	39.48	NA	novel	NM_145076	Trim24	sense overlapping	4262
chr16	4312684	4312741	MACS_peak_59076	50.57	57	chr16:4294663-4312789-	50.57	5.36	38.59	16_4312789_4294663_-18126|20.64|8|29	PMID:25714049	NM_009624	Adcy9	exonic	986
chr13	83592777	83592981	MACS_peak_49732	3157.1	204	chr13:83575535-83592981+	3157.1	12.84	20.83	mmu_circ_0004829	circBase	uc007rih.2	Mef2c	exonic	400
chr13	23285240	23285851	MACS_peak_45722	3100	611	chr13:23276284-23316747-	3100	59.37	11.62	NA	novel	NR_126443	4930557F10Rik	sense overlapping	40464
chr16	42292269	42292565	MACS_peak_73311	3100	296	chr16:42292270-42340520-	3100	9	11.62	NA	novel	NM_008083	Gap43	sense overlapping	48251
chr4	127026204	127027289	MACS_peak_130386	3100	1085	chr4:127026205-127027289+	3100	19.18	11.62	NA	novel	NM_023603	Sfpq	sense overlapping	1085
chr9	21424791	21425256	MACS_peak_183594	2519.11	465	chr9:21387700-21425256+	2519.11	16.46	11.33	NA	novel	NM_007871	Dnm2	sense overlapping	37557
chr14	12153657	12154426	MACS_peak_52657	2503.61	769	chr14:12152016-12207380+	2503.61	14.73	11.41	NA	novel	NM_008981	Ptprg	exonic	1320
chr2	165022575	165023212	MACS_peak_109669	1663.26	637	chr2:165001728-165023212-	1663.26	19.96	11.6	NA	novel	NM_144892	Ncoa5	sense overlapping	21485
chr4	123350831	123350987	MACS_peak_129858	1656.94	156	chr4:123350832-123350987-	1656.94	13.23	11.72	NA	novel	NM_001199136	Macf1	sense overlapping	156
chr1	135471017	135471491	MACS_peak_6718	1495.51	474	chr1:135471018-135532396-	1495.51	5.76	12.23	NA	novel	NM_173437	Nav1	sense overlapping	61379
chr6	52944857	52945973	MACS_peak_151880	1380.28	1116	chr6:52944858-52945973-	1380.28	13.82	11.84	NA	novel	ENSMUST00000074541	Jazf1	intronic	1116
chr10	120977998	120978777	MACS_peak_22659	1062.97	779	chr10:120977999-120978777-	1062.97	9.75	12.47	NA	novel	NM_001081193	Lemd3	sense overlapping	779
chr9	115282559	115283718	MACS_peak_192467	1003.53	1159	chr9:115266094-115302541-	1003.53	25.72	12.76	NA	novel	NM_024222	Stt3b	sense overlapping	36448
chr6	4735692	4736072	MACS_peak_148236	933.89	380	chr6:4735693-4736072-	933.89	14.59	12.8	NA	novel	ENSMUST00000004750	Sgce	intronic	380
chr1	155932788	155933450	MACS_peak_9998	847.36	662	chr1:155906489-155962560-	847.36	12.41	13.36	NA	novel	NM_001039184	Cep350	exonic	4784
chr8	8631964	8632486	MACS_peak_171664	843.14	522	chr8:8620314-8639489-	843.14	22.84	13.31	mmu_circ_0015032	circBase	NM_010111	Efnb2	sense overlapping	19176
chr8	61124111	61124320	MACS_peak_175833	823.43	209	chr8:61089571-61124320+	823.43	16.66	13.2	NA	novel	NM_175089	Nek1	exonic	1357
chr11	62389690	62389792	MACS_peak_28128	691.04	102	chr11:62340408-62401267-	691.04	9.64	14.56	NA	novel	NM_011308	Ncor1	exonic	3716
chr3	34649155	34652119	MACS_peak_113476	652.93	2964	chr3:34638358-34653284-	652.93	5.6	15.07	NA	novel	NM_011443	Sox2	antisense	14927
chr14	30348241	30348898	MACS_peak_54829	577.1	657	chr14:30346798-30350949+	577.1	24.91	16.31	NA	novel	NM_028981	Cacna1d	antisense	4152
chr9	112211327	112211943	MACS_peak_165608	557.44	616	chr9:112176095-112228935-	557.44	12.59	22.42	NA	novel	NM_028755	Arpp21	sense overlapping	52841
chr10	20245269	20245433	MACS_peak_14686	491.61	164	chr10:20230784-20250480+	491.61	19.64	17.53	10_19970286_19950590_-19696|19.22|5|8	PMID:25714049	NM_008635	Map7	exonic	570
chr15	47856389	47857336	MACS_peak_63537	455.18	947	chr15:47846335-47857981-	455.18	15.57	18.26	NA	novel	NM_001081391	Csmd3	sense overlapping	11647
chr3	158181540	158181610	MACS_peak_121161	409.44	70	chr3:158127215-158202494-	409.44	11.94	19.06	3_157865458_157790179_-75279|14.12|3|4	PMID:25714049	NM_001081358	Lrrc7	exonic	3759
chr17	46833557	46834200	MACS_peak_69535	407.09	643	chr17:46809568-46858698-	407.09	22.1	25.6	NA	novel	NM_001100452	Gltscr1l	sense overlapping	49131
chr1	177040380	177041157	MACS_peak_11899	365.03	777	chr1:177024451-177067333-	365.03	19.1	19.91	NA	novel	NM_011785	Akt3	sense overlapping	42883
chr7	59751693	59752322	MACS_peak_124871	313.86	629	chr7:59667850-59762050-	313.86	9.93	29.38	NA	novel	NR_002895	Snord116	sense overlapping	94201
chr2	25937945	25940313	MACS_peak_97800	305.58	2368	chr2:25937946-25941469-	305.58	4.91	22.03	2_25796989_25793466_-3523|15.10|14|17	PMID:25714049	NM_001276359	Camsap1	exonic	2545
chrX	134972550	134973342	MACS_peak_197306	254.36	792	chrX:134972347-134977747-	254.36	7.91	23.9	X_131512286_131506886_-5400|17.37|3|3	PMID:25714049	NM_175446	Zmat1	sense overlapping	5401
chr5	123445467	123446122	MACS_peak_110495	236.27	655	chr5:123440036-123447575+	236.27	6.91	33.92	NA	novel	NM_133917	Mlxip	exonic	1613
chr6	127475221	127475633	MACS_peak_135612	212.66	412	chr6:127468032-127491890+	212.66	17.27	33.61	6_127441908_127418050_-23858|17.43|15|50	PMID:25714049	NM_181402	Parp11	sense overlapping	23859
chr18	25697482	25698111	MACS_peak_85928	208.66	629	chr18:25697483-25698111-	208.66	11.91	26.14	NA	novel	ENSMUST00000025117	Celf4	intronic	629
chr1	64550848	64551134	MACS_peak_3605	207.34	286	chr1:64550849-64597643+	207.34	8.59	34.05	NA	novel	NM_009952	Creb1	sense overlapping	46795
chr11	65947468	65947729	MACS_peak_28348	205.04	261	chr11:65895841-65992869-	205.04	13.46	26.23	NA	novel	NM_001099633	Dnah9	exonic	3419
chr1	53831509	53831656	MACS_peak_3345	182.46	147	chr1:53826876-53914632-	182.46	5.92	26.76	1_53971476_53883720_-87756|14.76|4|5	PMID:25714049	NM_001001883	Hecw2	exonic	2173
chr4	133077202	133077426	MACS_peak_112549	148.18	224	chr4:133077203-133077426+	148.18	8.01	36.98	NA	novel	NM_146155	Ahdc1	sense overlapping	224
chr12	91293839	91294331	MACS_peak_42077	135.05	492	chr12:91289076-91366504-	135.05	8.58	29.01	NA	novel	NM_181815	Cep128	sense overlapping	77429
chr11	95429392	95429798	MACS_peak_31755	119.48	406	chr11:95429393-95429798+	119.48	9.99	29.86	NA	novel	ENSMUST00000107722	Spop	intronic	406
chr5	115934578	115934632	MACS_peak_109549	87.93	54	chr5:115933821-115934632+	87.93	8.27	54.38	NA	novel	NM_007708	Cit	exonic	105
chr6	47890065	47890192	MACS_peak_151535	69.17	127	chr6:47890066-47899007+	69.17	5.06	30.21	6_47849006_47840065_-8941|15.86|4|4	PMID:25714049	NM_146175	Zfp282	exonic	595
chr19	36966675	36966852	MACS_peak_71446	67.21	177	chr19:36951034-36970038+	67.21	4.13	57.45	19_37044528_37025524_-19004|14.03|2|2	PMID:25714049	NM_001080706	Btaf1	exonic	1273
chr5	23523978	23524814	MACS_peak_135853	3155.5	836	chr5:23434234-23528062-	3155.5	12.68	20	NA	novel	NM_009274	Srpk2	sense overlapping	93829
chr1	87428632	87428926	MACS_peak_5939	3100.4	294	chr1:87428633-87436891+	3100.4	18.89	12.77	NA	novel	NM_146112	Gigyf2	sense overlapping	8259
chr1	22534005	22534240	MACS_peak_1310	3100	235	chr1:22533399-22538623-	3100	20.56	11.62	1_22545462_22540238_-5224|21.84|14|201	PMID:25714049	NM_001012623	Rims1	exonic	646
chr1	30805553	30805850	MACS_peak_1767	3100	297	chr1:30805554-30805850-	3100	39.48	11.62	NA	novel	NM_001081080	Phf3	sense overlapping	297
chr1	136276537	136276758	MACS_peak_9148	3100	221	chr1:136273750-136282881-	3100	16.07	11.62	1_138179458_138170327_-9131|16.10|7|11	PMID:25714049	NM_001081360	Camsap2	exonic	2811
chr10	63015494	63016701	MACS_peak_17633	3100	1207	chr10:63014452-63019527-	3100	20.4	11.62	NA	novel	NM_001079824	Hnrnph3	sense overlapping	5076
chr10	79864896	79865714	MACS_peak_19161	3100	818	chr10:79864897-79865714-	3100	20.17	11.62	NA	novel	NR_038088	Bc1	intronic	818
chr11	58040689	58040755	MACS_peak_27626	3100	66	chr11:58040391-58044050+	3100	12.02	11.62	11_57857552_57853893_-3659|21.21|6|10	PMID:25714049	NM_028451	Larp1	exonic	947
chr11	77841960	77842568	MACS_peak_29794	3100	608	chr11:77841961-77842568+	3100	16.84	11.62	NA	novel	NM_011586	Myo18a	sense overlapping	608
chr13	55480644	55481666	MACS_peak_48048	3100	1022	chr13:55477783-55481666-	3100	14.4	11.62	NA	novel	NM_019813	Dbn1	sense overlapping	3884
chr13	99433768	99435547	MACS_peak_50782	3100	1779	chr13:99433769-99435547-	3100	9.61	11.62	NA	novel	NM_008634	Map1b	sense overlapping	1779
chr14	54642756	54643236	MACS_peak_56462	3100	480	chr14:54642757-54644171-	3100	17.99	11.62	NA	novel	NM_019567	Acin1	sense overlapping	1415
chr15	25364138	25364759	MACS_peak_61935	3100	621	chr15:25364139-25364759-	3100	21.07	11.62	NA	novel	NM_027395	Basp1	sense overlapping	621
chr16	20651761	20653248	MACS_peak_70893	3100	1487	chr16:20651762-20662659+	3100	45.46	11.62	NA	novel	NM_134101	Psmd2	sense overlapping	10898
chr17	33652272	33652326	MACS_peak_80022	3100	54	chr17:33649595-33665645-	3100	70.68	11.62	NA	novel	NM_029804	Hnrnpm	exonic	1347
chr19	26720728	26720947	MACS_peak_92840	3100	219	chr19:26710458-26752041+	3100	9.19	11.62	NA	novel	NM_011416	Smarca2	exonic	743
chr3	30818330	30820220	MACS_peak_112979	3100	1890	chr3:30809822-30820228+	3100	32.32	11.62	NA	novel	NM_027016	Sec62	sense overlapping	10407
chr3	87975836	87977936	MACS_peak_116295	3100	2100	chr3:87975837-87977936+	3100	12.43	11.62	NA	novel	NM_016701	Nes	sense overlapping	2100
chr5	143264292	143264681	MACS_peak_147269	3100	389	chr5:143264051-143265133-	3100	28.7	11.62	NA	novel	NM_017467	Zfp316	exonic	609
chr6	124913792	124917775	MACS_peak_157605	3100	3983	chr6:124913793-124917775-	3100	35.58	11.62	NA	novel	NM_026988	Ptms	sense overlapping	3983
chr7	12774112	12775658	MACS_peak_159787	3100	1546	chr7:12770804-12775658-	3100	26.01	11.62	7_13361007_13356153_-4854|23.20|13|51	PMID:25714049	NM_001017955	Zscan18	exonic	1972
chr7	28338351	28338744	MACS_peak_160928	3100	393	chr7:28338352-28338744-	3100	25.03	11.62	NA	novel	NM_013676	Supt5	sense overlapping	393
chr6	124746487	124746834	MACS_peak_120351	3100	347	chr6:124746488-124746834-	3100	7.86	13.56	NA	novel	NM_007881	Atn1	sense overlapping	347
chr1	42696325	42698221	MACS_peak_2351	3071.82	1896	chr1:42696326-42698221+	3071.82	12.78	13.15	NA	novel	ENSMUST00000176807	Gm20646	intronic	1896
chr5	52184467	52184903	MACS_peak_138723	3027.03	436	chr5:52166701-52184903-	3027.03	19.95	11.7	NA	novel	NM_007839	Dhx15	exonic	1177
chr16	72933212	72934007	MACS_peak_57119	2811.38	795	chr16:72933213-72935786-	2811.38	6.65	13.59	NA	novel	NM_019413	Robo1	antisense	2574
chr2	85061887	85064016	MACS_peak_102716	2619	2129	chr2:85058126-85072168+	2619	11.74	11.12	NA	novel	NM_001081260	Tnks1bp1	exonic	4380
chr6	118404579	118405340	MACS_peak_156881	2533.87	761	chr6:118404256-118413919-	2533.87	20.36	11.22	NA	novel	NM_194339	Bms1	exonic	1651
chr16	36912819	36912978	MACS_peak_72441	2341.67	159	chr16:36912820-36912978+	2341.67	15.83	11.2	NA	novel	uc012afk.1	Golgb1	intronic	159
chr11	50381510	50382715	MACS_peak_26797	2196.41	1205	chr11:50381511-50382715+	2196.41	16.77	11.3	NA	novel	NM_021510	Hnrnph1	sense overlapping	1205
chr11	94333987	94334527	MACS_peak_27285	2110.23	540	chr11:94333988-94334527+	2110.23	24.77	13.02	NA	novel	NM_027799	Ankrd40	sense overlapping	540
chr7	143523961	143524363	MACS_peak_171191	2042.79	402	chr7:143514097-143527300-	2042.79	11.35	11.5	NA	novel	NM_008672	Nap1l4	sense overlapping	13204
chr15	25780973	25781864	MACS_peak_61984	2035.34	891	chr15:25778081-25793246+	2035.34	15.2	11.47	NA	novel	NM_019472	Myo10	exonic	1739
chr15	77774634	77775169	MACS_peak_49866	1951.69	535	chr15:77774635-77775169-	1951.69	7.62	12.07	NA	novel	NM_022410	Myh9	sense overlapping	535
chr17	13887981	13888977	MACS_peak_78120	1841.56	996	chr17:13887982-13896222+	1841.56	9.04	11.52	NA	novel	NM_010806	Mllt4	exonic	1131
chr12	76327565	76329914	MACS_peak_40085	1811.86	2349	chr12:76327566-76330488+	1811.86	10.79	11.48	12_77431475_77428553_-2922|21.49|5|7	PMID:25714049	NM_001101471	Akap5	sense overlapping	2923
chr5	135216589	135218294	MACS_peak_146182	1689.53	1705	chr5:135198171-135222096+	1689.53	11.79	11.46	NA	novel	NM_011714	Baz1b	exonic	2511
chr2	32630890	32631467	MACS_peak_98735	1598.76	577	chr2:32628369-32634096+	1598.76	9.28	11.66	NA	novel	NM_021515	Ak1	sense overlapping	5728
chr1	158472374	158472562	MACS_peak_10262	1461.15	188	chr1:158472375-158472562+	1461.15	8.57	11.88	1_160402693_160402506_-187|17.55|7|10	PMID:25714049	NM_007495	Astn1	exonic	188
chr13	100060293	100061506	MACS_peak_43704	1432.4	1213	chr13:100052973-100064489-	1432.4	13.85	14.91	NA	novel	NM_001081061	Bdp1	exonic	2282
chr13	101757325	101758039	MACS_peak_50938	1380.25	714	chr13:101757326-101758039+	1380.25	15.15	11.83	NA	novel	NM_001077495	Pik3r1	antisense	714
chr6	18433819	18435446	MACS_peak_149058	1372.93	1627	chr6:18397333-18435446-	1372.93	10.22	11.82	NA	novel	NM_080285	Cttnbp2	exonic	3091
chr3	10088670	10088830	MACS_peak_111838	1341.95	160	chr3:10088671-10088830-	1341.95	8.18	11.83	NA	novel	NR_045710	Gm9833	antisense	160
chr17	32221145	32221508	MACS_peak_79833	1257.34	363	chr17:32214631-32225713-	1257.34	7.92	11.9	NA	novel	NM_020508	Brd4	exonic	1269
chr5	66998440	66999582	MACS_peak_106407	1208.76	1142	chr5:66997120-67002649-	1208.76	6.19	13.8	NA	novel	NM_001001980	Limch1	antisense	5530
chr13	14245523	14246066	MACS_peak_45252	1189.63	543	chr13:14230569-14306933-	1189.63	7.5	12.17	NA	novel	NM_001081348	Hecw1	sense overlapping	76365
chr7	64695023	64696017	MACS_peak_141092	1148.35	994	chr7:64695024-64696017+	1148.35	7.23	16.52	7_71840903_71839910_-993|20.05|11|41	PMID:25714049	NM_007461	Apba2	exonic	994
chr18	47248847	47249072	MACS_peak_75619	1068.9	225	chr18:47248848-47249072-	1068.9	6.9	17.39	NA	novel	ENSMUST00000123228	Sema6a	intronic	225
chr5	142787133	142788759	MACS_peak_147205	1036.82	1626	chr5:142787134-142790189-	1036.82	6.36	12.73	NA	novel	NM_178242	Tnrc18	exonic	1752
chr6	17491199	17492437	MACS_peak_148941	1034.3	1238	chr6:17491200-17492437+	1034.3	13.66	12.76	NA	novel	NM_008591	Met	sense overlapping	1238
chr5	34435965	34436787	MACS_peak_137195	1027.23	822	chr5:34420001-34485848+	1027.23	15.89	12.72	NA	novel	NM_001243123	Fam193a	sense overlapping	65848
chr4	130727997	130728164	MACS_peak_131026	971.09	167	chr4:130668925-130728164+	971.09	11.22	12.92	4_130284079_130224840_-59239|14.02|11|14	PMID:25714049	NM_030722	Pum1	exonic	898
chr10	80124801	80127509	MACS_peak_14434	970.27	2708	chr10:80124802-80130436+	970.27	10.94	15.68	NA	novel	NM_011492	Stk11	sense overlapping	5635
chr3	10015074	10016111	MACS_peak_95997	887	1037	chr3:10015075-10016111+	887	6.09	17.68	NA	novel	NM_010634	Fabp5	sense overlapping	1037
chr2	131511983	131514407	MACS_peak_106195	849.4	2424	chr2:131511984-131555847+	849.4	9.67	13.3	NA	novel	NM_145533	Smox	sense overlapping	43864
chr3	30936284	30937156	MACS_peak_112993	845.81	872	chr3:30914095-30942652-	845.81	8.03	13.33	3_30841574_30813017_-28557|18.77|2|4	PMID:25714049	NM_153421	Phc3	exonic	2161
chr17	28806775	28807399	MACS_peak_79398	821.07	624	chr17:28805929-28807399+	821.07	18.39	13.17	17_28944344_28942874_-1470|21.90|10|15	PMID:25714049	NM_001081315	Brpf3	exonic	1471
chr14	55886984	55887231	MACS_peak_56603	817.77	247	chr14:55886985-55887231+	817.77	14.23	13.17	NA	novel	NM_027143	Khnyn	sense overlapping	247
chr11	6601464	6601637	MACS_peak_24011	778.16	173	chr11:6601465-6601637-	778.16	6.76	13.56	NA	novel	NM_001081652	Nacad	sense overlapping	173
chr11	98348775	98349165	MACS_peak_32086	731.56	390	chr11:98348776-98349165+	731.56	10.31	14.19	NA	novel	NM_144828	Ppp1r1b	sense overlapping	390
chr2	155406631	155408167	MACS_peak_82784	724.53	1536	chr2:155406632-155408167-	724.53	6.12	19.36	NA	novel	NM_001242558	Ncoa6	intronic	1536
chr17	56393717	56394106	MACS_peak_70184	720.28	389	chr17:56352976-56394106+	720.28	6.72	19.43	NA	novel	NM_172132	Kdm4b	exonic	1635
chr7	45048846	45049769	MACS_peak_139492	647.24	923	chr7:45048847-45049769-	647.24	5.06	20.6	NA	novel	NM_175022	Prr12	sense overlapping	923
chr3	105717619	105717793	MACS_peak_117939	643.84	174	chr3:105717620-105717793+	643.84	13.55	15.03	NA	novel	NM_175398	Fam212b	sense overlapping	174
chr3	107672090	107672335	MACS_peak_118060	611.53	245	chr3:107672091-107675053-	611.53	5.24	15.55	NA	novel	NM_145542	Ahcyl1	sense overlapping	2963
chr10	18523548	18525689	MACS_peak_11013	606.02	2141	chr10:18514095-18525689+	606.02	6.59	19.82	NA	novel	NM_173390	Nhsl1	sense overlapping	11595
chr13	54563985	54564049	MACS_peak_36823	562.38	64	chr13:54560791-54564049-	562.38	10.42	21.3	NA	novel	NM_001252647	4833439L19Rik	intronic	3259
chr7	81893638	81894126	MACS_peak_165450	550.6	488	chr7:81892964-81905636-	550.6	6.54	16.72	NA	novel	NM_013886	Hdgfrp3	sense overlapping	12673
chr2	84710317	84711472	MACS_peak_102679	537.26	1155	chr2:84710318-84711472-	537.26	13.26	16.97	2_84551629_84550475_-1154|17.16|1|2	PMID:25714049	NM_144887	Zdhhc5	exonic	1155
chr6	136587044	136587683	MACS_peak_120986	531.6	639	chr6:136571473-136587683+	531.6	4.68	21.91	mmu_circ_0013137	circBase	NM_019426	Atf7ip	exonic	868
chr10	29144336	29144917	MACS_peak_11505	530.9	581	chr10:29144337-29146576+	530.9	7.22	21.98	NA	novel	NM_026138	Soga3	sense overlapping	2240
chr6	48025089	48026368	MACS_peak_151564	507.5	1279	chr6:48017639-48029374-	507.5	7.77	17.4	NA	novel	NM_001081382	Zfp777	sense overlapping	11736
chr7	63938092	63938571	MACS_peak_141017	486.06	479	chr7:63938093-63938571-	486.06	5.64	23.72	NA	novel	NM_021366	Klf13	sense overlapping	479
chr1	182446273	182446736	MACS_peak_12542	469.6	463	chr1:182428894-182449179+	469.6	11.5	18.12	NA	novel	NM_173378	Trp53bp2	exonic	2697
chr5	25313979	25315875	MACS_peak_103791	454.73	1896	chr5:25298870-25329575-	454.73	6.17	24.09	mmu_circ_0012469	circBase	NM_001081383	Kmt2c	exonic	7091
chr17	6176629	6176951	MACS_peak_77222	449.57	322	chr17:6137211-6185298+	449.57	4.5	18.34	17_6185298_6137211_-48087|18.69|23|202	PMID:25714049	NM_054040	Tulp4	sense overlapping	48088
chr7	45346731	45346932	MACS_peak_123984	447.49	201	chr7:45343741-45346932-	447.49	7.79	24.49	mmu_circ_0014208	circBase	NM_029741	Ppfia3	exonic	264
chr18	35978283	35978685	MACS_peak_74577	408.18	402	chr18:35978284-35988238+	408.18	6.41	25.55	NA	novel	NM_028707	Psd2	exonic	1300
chr16	50224680	50225293	MACS_peak_73799	407.08	613	chr16:50209085-50225293-	407.08	8.59	19.08	NA	novel	NM_027444	Bbx	exonic	1351
chr13	45952507	45953535	MACS_peak_47249	400.66	1028	chr13:45918888-45956575-	400.66	10	19.23	mmu_circ_0004613	circBase	NM_009124	Atxn1	sense overlapping	37688
chr5	76997422	76997777	MACS_peak_140347	374.78	355	chr5:76997423-77007407+	374.78	3.32	19.82	NA	novel	NM_025691	Srp72	sense overlapping	9985
chr5	8367200	8368367	MACS_peak_134692	373.96	1167	chr5:8367201-8412300-	373.96	6.12	19.86	NA	novel	NM_013726	Dbf4	sense overlapping	45100
chr11	71759577	71760266	MACS_peak_21975	364.76	689	chr11:71759578-71771974+	364.76	6.53	27.12	11_71585476_71573080_-12396|18.19|11|18	PMID:25714049	NM_177618	Wscd1	exonic	1111
chr15	98844203	98845088	MACS_peak_51995	340.12	885	chr15:98844204-98845088-	340.12	4.15	28.57	NA	novel	NM_001033276	Kmt2d	sense overlapping	885
chr3	86076587	86077211	MACS_peak_116062	339.94	624	chr3:86075148-86085357+	339.94	17.58	20.98	3_85889279_85879070_-10209|21.05|2|2	PMID:25714049	NM_001082414	Sh3d19	sense overlapping	10210
chr8	11561417	11562334	MACS_peak_172105	336.49	917	chr8:11561418-11562334+	336.49	6.74	21.12	8_11562334_11561418_-916|15.66|11|29	PMID:25714049	NM_011919	Ing1	sense overlapping	917
chr2	131936922	131937230	MACS_peak_106213	325.41	308	chr2:131936923-131937230+	325.41	6.44	21.26	NA	novel	ENSMUST00000124100	PRND	intronic	308
chr4	153432047	153432853	MACS_peak_114908	314.58	806	chr4:153432048-153432853-	314.58	7.37	28.66	4_152806962_152806157_-805|20.09|4|4	PMID:25714049	NM_001099299	Ajap1	exonic	806
chr4	122871396	122871497	MACS_peak_129809	313.04	101	chr4:122861934-122872456-	313.04	5.77	21.72	NA	novel	NM_007598	Cap1	exonic	1354
chr13	34884048	34884216	MACS_peak_46375	305.55	168	chr13:34884049-34884216+	305.55	6.97	22.03	NA	novel	NM_013830	Prpf4b	sense overlapping	168
chr18	34803449	34804049	MACS_peak_86477	305	600	chr18:34795675-34813561+	305	6.56	22.02	NA	novel	NM_001081256	Kdm3b	exonic	2725
chr3	56008235	56008428	MACS_peak_114507	300.78	193	chr3:55967912-56058830-	300.78	7.07	22.29	3_55862752_55771834_-90918|16.13|10|12	PMID:25714049	NM_030595	Nbea	exonic	4127
chr15	57821031	57823751	MACS_peak_64042	299.5	2720	chr15:57762646-57823751+	299.5	12.79	22.32	NA	novel	NM_199449	Zhx2	exonic	2794
chr15	84804759	84805110	MACS_peak_57128	286.68	351	chr15:84803454-84808158-	286.68	9.65	29.84	NA	novel	NR_030731	Phf21b	exonic	576
chr1	128193459	128193756	MACS_peak_8271	280.77	297	chr1:128151744-128197097+	280.77	6.48	22.76	NA	novel	NM_181750	R3hdm1	exonic	2398
chr2	130542306	130542456	MACS_peak_106022	275.76	150	chr2:130537552-130545083+	275.76	5.83	23.02	NA	novel	NM_008980	Ptpra	exonic	977
chr6	121412507	121413616	MACS_peak_157447	275.32	1109	chr6:121410614-121413616-	275.32	7.67	23.03	6_121363634_121360632_-3002|16.51|5|6	PMID:25714049	NR_110358	Iqsec3	exonic	1271
chr2	91805023	91805289	MACS_peak_103043	271.06	266	chr2:91805024-91810209-	271.06	9.85	23.39	NA	novel	NM_172669	Ambra1	antisense	5186
chr3	89235104	89236159	MACS_peak_99849	266.54	1055	chr3:89235105-89236159-	266.54	5.87	30.93	NA	novel	NM_183037	Trim46	sense overlapping	1055
chr2	29901076	29901247	MACS_peak_98283	263.86	171	chr2:29892186-29904107+	263.86	9.46	23.55	mmu_circ_0009798	circBase	NM_013615	Odf2	exonic	754
chr11	69601251	69602175	MACS_peak_21804	261.63	924	chr11:69601252-69602454-	261.63	4.12	31.81	NA	novel	NM_013415	Atp1b2	sense overlapping	1203
chr3	107742653	107742808	MACS_peak_89870	261.37	155	chr3:107742654-107742808-	261.37	4.28	31.88	NA	novel	NM_007778	Csf1	sense overlapping	155
chr2	169883525	169886459	MACS_peak_110281	260.75	2934	chr2:169883526-169886459-	260.75	10.58	23.59	NA	novel	ENSMUST00000180945	Gm26883	sense overlapping	2934
chr11	108931438	108931579	MACS_peak_33445	258.07	141	chr11:108923152-108931579+	258.07	9.25	23.72	mmu_circ_0000335	circBase	NM_015732	Axin2	exonic	1092
chr19	23892734	23894020	MACS_peak_70746	250.1	1286	chr19:23892735-23894020+	250.1	4.55	32.95	19_23968510_23967225_-1285|20.06|6|8	PMID:25714049	NM_177034	Apba1	exonic	1286
chr4	124838318	124838917	MACS_peak_111410	245.57	599	chr4:124837698-124842591+	245.57	11.7	32.05	NA	novel	NM_008636	Mtf1	exonic	766
chr14	100022621	100023367	MACS_peak_45209	241.14	746	chr14:100022622-100063065-	241.14	4.71	33.45	NA	novel	NM_010636	Klf12	sense overlapping	40444
chr18	63794224	63794343	MACS_peak_88848	229.59	119	chr18:63755036-63796281+	229.59	7.5	25.16	18_63955935_63914690_-41245|17.50|5|12	PMID:25714049	NM_001014981	Wdr7	exonic	1609
chr4	129473774	129474245	MACS_peak_130850	228.81	471	chr4:129468994-129474245+	228.81	6.59	25.26	NA	novel	NM_133889	Bsdc1	exonic	790
chr16	14099925	14100907	MACS_peak_53737	228.41	982	chr16:14099926-14100907+	228.41	3.56	35.05	NA	novel	NM_144518	2900011O08Rik	sense overlapping	982
chr15	39586438	39586776	MACS_peak_63152	227.55	338	chr15:39554948-39616510+	227.55	12.68	25.22	15_39448056_39386494_-61562|14.86|3|4	PMID:25714049	NM_053271	Rims2	sense overlapping	61563
chr12	85899392	85899484	MACS_peak_35814	225.38	92	chr12:85899393-85917774+	225.38	9.17	32.98	NA	novel	uc007ohk.2	Ttll5	exonic	294
chr2	132808212	132808992	MACS_peak_91286	217.35	780	chr2:132805143-132812175-	217.35	7.32	33.65	NA	novel	NM_175113	Trmt6	sense overlapping	7033
chr18	60712722	60713632	MACS_peak_67512	205.2	910	chr18:60712723-60713632-	205.2	6.01	37.34	18_60873286_60872377_-909|17.56|12|25	PMID:25714049	uc008fat.1	Ndst1	exonic	910
chr17	66052953	66053091	MACS_peak_62832	198.67	138	chr17:66024076-66053091-	198.67	6.95	37.86	mmu_circ_0000807	circBase	NM_001025572	Ankrd12	exonic	994
chr17	25830768	25831197	MACS_peak_67696	197.06	429	chr17:25830769-25831197-	197.06	14.8	34.39	NA	novel	NM_019719	Stub1	sense overlapping	429
chr6	39522655	39523759	MACS_peak_150934	194.11	1104	chr6:39522656-39523759-	194.11	6.65	26.6	6_39473758_39472655_-1103|19.93|16|29	PMID:25714049	NM_172477	Dennd2a	exonic	1104
chr18	84354434	84354754	MACS_peak_69276	186.19	320	chr18:84315806-84407793-	186.19	8.34	39.51	mmu_circ_0007573	circBase	ENSMUST00000125450	Zfp407	intronic	91988
chr5	66451467	66452283	MACS_peak_119782	182.44	816	chr5:66451468-66452283-	182.44	5.03	35.51	mmu_circ_0012736	circBase	NM_009686	Apbb2	exonic	816
chr10	81143961	81145217	MACS_peak_14623	178.74	1256	chr10:81143962-81145217+	178.74	5.5	40.41	10_80607962_80606707_-1255|22.20|3|3	PMID:25714049	NM_010731	Zbtb7a	exonic	1256
chr11	74656422	74656625	MACS_peak_22196	156.02	203	chr11:74656423-74657339+	156.02	8.09	44.12	mmu_circ_0000287	circBase	NM_001081158	Cluh	exonic	375
chr18	80971174	80974629	MACS_peak_78037	153.51	3455	chr18:80969275-80974629-	153.51	4.4	37.05	NA	novel	NM_178280	Sall3	sense overlapping	5355
chr4	108478872	108479853	MACS_peak_97556	152.63	981	chr4:108478873-108491464-	152.63	8.19	44.37	NA	novel	ENSMUST00000119769	Gm12739	sense overlapping	12592
chr16	11253642	11253986	MACS_peak_69867	151.97	344	chr16:11253643-11253986-	151.97	3.43	28.35	NA	novel	NM_146066	Gspt1	sense overlapping	344
chr18	82986743	82988106	MACS_peak_78114	149.9	1363	chr18:82986744-82988198+	149.9	5.98	36.7	18_83157590_83156136_-1454|18.31|6|8	PMID:25714049	NM_183033	Zfp516	exonic	1455
chr10	109823058	109823814	MACS_peak_16473	142.98	756	chr10:109816254-109824681+	142.98	3.94	45.49	NA	novel	NM_001081035	Nav3	antisense	8428
chr18	33193384	33194734	MACS_peak_74321	138.22	1350	chr18:33187738-33194734+	138.22	9.43	37.14	NA	novel	NM_009793	Camk4	sense overlapping	6997
chr19	4324196	4325245	MACS_peak_91289	132.26	1049	chr19:4319180-4362914-	132.26	3.72	29	NA	novel	NM_001001984	Kdm2a	sense overlapping	43735
chr14	120324793	120325412	MACS_peak_60411	132.04	619	chr14:120324794-120325412+	132.04	5.44	29.03	14_120724634_120724016_-618|16.50|17|64	PMID:25714049	NM_175341	Mbnl2	exonic	619
chr7	65312554	65313424	MACS_peak_125355	130.58	870	chr7:65311004-65342719-	130.58	3.19	47.9	NA	novel	NM_009386	Tjp1	exonic	3990
chr19	7425022	7425282	MACS_peak_91825	126.54	260	chr19:7425023-7425282+	126.54	14.64	29.32	NA	novel	NM_175381	2700081O15Rik	sense overlapping	260
chr11	106566964	106568627	MACS_peak_25374	124.13	1663	chr11:106544172-106568627-	124.13	2.71	48.49	11_106429941_106405486_-24455|19.62|7|9	PMID:25714049	NM_198292	Tex2	exonic	2452
chr4	41378946	41379870	MACS_peak_93710	113.8	924	chr4:41378947-41379870+	113.8	7.57	50.25	4_41326903_41325980_-923|20.06|7|15	PMID:25714049	NM_023305	Ubap1	exonic	924
chr7	144285054	144285137	MACS_peak_171317	111.18	83	chr7:144285055-144286766+	111.18	9.21	29.71	7_151472671_151470960_-1711|15.30|9|17	PMID:25714049	NM_001113373	Shank2	exonic	208
chr1	186739603	186739863	MACS_peak_9595	107.97	260	chr1:186736116-186739863-	107.97	4.76	50.93	1_188563742_188559995_-3747|19.47|15|35	PMID:25714049	NM_026041	Rrp15	exonic	557
chr1	93749846	93750985	MACS_peak_4944	104.05	1139	chr1:93749847-93750985-	104.05	3.71	51.49	1_95647562_95646424_-1138|17.08|2|2	PMID:25714049	NM_025920	Thap4	exonic	1139
chr2	93813398	93813964	MACS_peak_78872	97.34	566	chr2:93806025-93813964-	97.34	3.57	52.89	2_93654121_93646182_-7939|16.79|7|11	PMID:25714049	NM_010163	Ext2	exonic	773
chr3	66994516	66994712	MACS_peak_87502	95.79	196	chr3:66994517-66996590+	95.79	4.05	53.02	mmu_circ_0001136	circBase	NM_025822	Rsrc1	exonic	322
chr5	3559605	3559698	MACS_peak_134336	92.21	93	chr5:3558473-3559698+	92.21	3.57	30.28	5_3559698_3558473_-1225|18.99|10|12	PMID:25714049	NM_001042501	Fam133b	exonic	264
chr17	26142617	26143576	MACS_peak_67791	86.38	959	chr17:26142618-26143576+	86.38	8.35	38.41	17_26280521_26279563_-958|17.52|6|14	PMID:25714049	NM_009733	Axin1	exonic	959
chr3	55116983	55117639	MACS_peak_114297	85.59	656	chr3:55116984-55117795+	85.59	8.78	30.4	NA	novel	NM_144895	Spg20	exonic	812
chr14	62587152	62587886	MACS_peak_43618	79.68	734	chr14:62587153-62587886+	79.68	4.18	55.82	mmu_circ_0005337	circBase	NM_001243857	Fam124a	exonic	734
chr17	84993679	84994539	MACS_peak_83713	72.12	860	chr17:84993680-85005566+	72.12	3.57	30.67	NA	novel	NM_011151	Ppm1b	exonic	1148
chr13	54523969	54524923	MACS_peak_47907	70.21	954	chr13:54523970-54529223+	70.21	4.31	30.95	13_54630584_54625331_-5253|16.50|5|7	PMID:25714049	NM_176987	Simc1	exonic	3006
chr7	16960392	16961108	MACS_peak_160093	67.27	716	chr7:16960393-16961108+	67.27	7.02	30.56	NA	novel	NM_001007569	Pnmal1	sense overlapping	716
chr6	42668402	42668587	MACS_peak_151205	63.4	185	chr6:42668403-42668587-	63.4	4.81	30.02	NA	novel	ENSMUST00000045054	Fam115a	sense overlapping	185
chr10	17914991	17916032	MACS_peak_10948	61.17	1041	chr10:17908034-17916032-	61.17	4.27	58.95	10_17635838_17627840_-7998|20.34|10|27	PMID:25714049	NM_001033432	Heca	exonic	1196
chr3	88208860	88211367	MACS_peak_116336	56.25	2507	chr3:88208152-88211416+	56.25	9.62	30.18	NA	novel	uc008pug.1	AK141565	sense overlapping	3265
chr2	136116176	136116962	MACS_peak_106612	55	786	chr2:136116177-136116962+	55	3.27	30.38	NA	novel	NM_172858	Pak7	antisense	786
chr13	35815908	35816575	MACS_peak_35643	52.07	667	chr13:35790101-35816575+	52.07	3.47	59.54	13_35908444_35881970_-26474|12.74|11|36	PMID:25714049	NM_009881	Cdyl	exonic	742

## Sheet: OGDR1.5h-m1A_circRNA
Chromosome	Transcript start	Transcript end	Peak ID	Score	Peak length	circRNA	P value (-log10)	Fold enrichment	FDR	circBaseID	Source	Best transcript	Gene name	Catalog	Predicted sequence length
chr18	75521376	75521869	MACS_peak_93455	3146.08	493	chr18:75519739-75521869-	3146.08	23.66	5.26	18_75681523_75679393_-2130|17.53|14|123	PMID:25714049	NM_201354	Ctif	exonic	862
chr1	162710090	162710424	MACS_peak_10993	3100	334	chr1:162672608-162710424-	3100	17.66	5.87	NA	novel	NM_001081290	Prrc2c	sense overlapping	37817
chr1	178335632	178337073	MACS_peak_12322	3100	1441	chr1:178332997-178337073-	3100	16.3	5.87	NA	novel	NM_016805	Hnrnpu	sense overlapping	4077
chr1	181923734	181924108	MACS_peak_12755	3100	374	chr1:181923735-181930729-	3100	13.6	5.87	NA	novel	NM_008680	Enah	sense overlapping	6995
chr10	25501823	25502387	MACS_peak_15463	3100	564	chr10:25479009-25507857+	3100	13.26	5.87	NA	novel	NM_013511	Epb4.1l2	exonic	1644
chr11	75751998	75752240	MACS_peak_30476	3100	242	chr11:75751999-75755615+	3100	7.42	5.87	NA	novel	NM_009536	Ywhae	sense overlapping	3617
chr11	77841960	77842568	MACS_peak_30835	3100	608	chr11:77841961-77842568+	3100	14.72	5.87	NA	novel	NM_011586	Myo18a	sense overlapping	608
chr12	29811372	29811734	MACS_peak_38866	3100	362	chr12:29811373-29827831+	3100	34.92	5.87	12_30512696_30496238_-16458|13.72|2|3	PMID:25714049	NM_008666	Myt1l	exonic	1328
chr12	83663978	83664259	MACS_peak_42915	3100	281	chr12:83659423-83664259+	3100	14.13	5.87	NA	novel	NM_027349	Rbm25	exonic	605
chr13	83575534	83575730	MACS_peak_51841	3100	196	chr13:83575535-83575730+	3100	17.05	5.87	NA	novel	uc007rih.2	Mef2c	exonic	196
chr14	75323034	75324803	MACS_peak_60271	3100	1769	chr14:75291569-75339489+	3100	13.23	5.87	NA	novel	NM_026083	Zc3h13	sense overlapping	47921
chr17	56566577	56566963	MACS_peak_84498	3100	386	chr17:56566578-56566963-	3100	12.71	5.87	NA	novel	ENSMUST00000156640	Safb2	intronic	386
chr2	49722976	49723149	MACS_peak_104713	3100	173	chr2:49722977-49739200+	3100	16.85	5.87	NA	novel	NM_008449	Kif5c	exonic	903
chr3	28577546	28577772	MACS_peak_117665	3100	226	chr3:28577547-28594132+	3100	15.84	5.87	NA	novel	NM_026910	Tnik	sense overlapping	16586
chr4	32756415	32757086	MACS_peak_128036	3100	671	chr4:32756416-32757906+	3100	60.52	5.87	NA	novel	ENSMUST00000125323	Mdn1	intronic	1491
chr4	109013509	109013840	MACS_peak_133908	3100	331	chr4:109013510-109024277+	3100	10.21	5.87	4_108696882_108686115_-10767|14.68|3|4	PMID:25714049	NM_146150	Nrd1	exonic	641
chr4	133720549	133720999	MACS_peak_136968	3100	450	chr4:133719537-133723051-	3100	21.54	5.87	mmu_circ_0001283	circBase	NM_001080819	Arid1a	exonic	780
chr4	150405713	150406664	MACS_peak_139311	3100	951	chr4:150395209-150406664+	3100	20.57	5.87	NA	novel	NM_001085492	Rere	sense overlapping	11456
chr5	104092377	104093373	MACS_peak_148015	3100	996	chr5:104090392-104093373-	3100	10.34	5.87	NA	novel	NM_010097	Sparcl1	exonic	1066
chr7	25290380	25290612	MACS_peak_167492	3100	232	chr7:25289544-25290612+	3100	14.44	5.87	NA	novel	NM_027882	Cic	sense overlapping	1069
chr7	99345717	99345890	MACS_peak_173923	3100	173	chr7:99345718-99345890-	3100	18.36	5.87	NA	novel	NM_009825	Serpinh1	sense overlapping	173
chr8	84706664	84707414	MACS_peak_185404	3100	750	chr8:84706665-84707414-	3100	14.46	5.87	NA	novel	ENSMUST00000148644	Nfix	intronic	750
chr9	49564868	49565041	MACS_peak_194506	3100	173	chr9:49543011-49569900-	3100	13.44	5.87	9_49378005_49351116_-26889|22.99|2|2	PMID:25714049	NM_010875	Ncam1	exonic	1746
chrX	170010673	170011536	MACS_peak_207576	3100	863	chrX:170010674-170019058+	3100	18.15	5.87	NA	novel	ENSMUST00000178789	Gm21887	sense overlapping	8385
chrY	90736913	90744536	MACS_peak_207786	3100	7623	chrY:90736914-90819638+	3100	20.07	5.87	NA	novel	NM_133362	Erdr1	sense overlapping	82725
chr11	30142119	30142422	MACS_peak_25824	3100	303	chr11:30142120-30143177-	3100	11.19	5.8	NA	novel	NM_009260	Sptbn1	exonic	462
chr11	50296871	50297134	MACS_peak_27330	3100	263	chr11:50296020-50297134-	3100	9.01	5.8	NA	novel	NM_007597	Canx	sense overlapping	1115
chr6	83402666	83404824	MACS_peak_160216	2728.21	2158	chr6:83402667-83404824-	2728.21	6.96	5.33	6_83354818_83352661_-2157|23.66|10|22	PMID:25714049	NM_183138	Tet3	exonic	2158
chr13	103751858	103753308	MACS_peak_52261	2699.45	1450	chr13:103743635-103764419-	2699.45	13.08	5.55	NA	novel	NM_172592	Srek1	sense overlapping	20785
chr4	8751323	8753148	MACS_peak_126924	2693.36	1825	chr4:8751324-8753148+	2693.36	8.59	5.28	4_8680295_8678471_-1824|20.33|6|12	PMID:25714049	NM_001277149	Chd7	exonic	1825
chr3	84190512	84191236	MACS_peak_109179	2520.84	724	chr3:84190513-84193372-	2520.84	10.25	10.84	3_83997294_83994435_-2859|22.15|3|3	PMID:25714049	NM_030706	Trim2	exonic	1057
chr9	73011977	73012157	MACS_peak_197480	2517.86	180	chr9:73011978-73012157+	2517.86	14.34	5.34	NA	novel	NM_028181	Ccpg1	sense overlapping	180
chr15	30669099	30670051	MACS_peak_63388	2500.86	952	chr15:30634644-30698644+	2500.86	11.94	5.37	NA	novel	NM_008729	Ctnnd2	sense overlapping	64001
chr6	83191334	83191662	MACS_peak_160179	2226.52	328	chr6:83191335-83191662+	2226.52	10.09	4.74	NA	novel	NM_007835	Dctn1	sense overlapping	328
chr2	37646916	37647625	MACS_peak_104008	2138.53	709	chr2:37580673-37657739-	2138.53	13.04	4.76	2_37513259_37436193_-77066|17.99|8|9	PMID:25714049	NM_009261	Strbp	sense overlapping	77067
chr5	14668964	14669675	MACS_peak_140948	2112.28	711	chr5:14668965-14669675+	2112.28	8.25	4.69	5_14669675_14668965_-710|20.39|2|2	PMID:25714049	NM_011995	Pclo	exonic	711
chr9	65794448	65795495	MACS_peak_196434	1956.35	1047	chr9:65786582-65795495-	1956.35	9.37	4.76	NA	novel	NM_172536	Zfp609	sense overlapping	8914
chr4	132006957	132007438	MACS_peak_134019	1909.59	481	chr4:131967788-132007438-	1909.59	9.8	5.77	NA	novel	NM_183428	Epb4.1	exonic	1834
chr6	125123997	125124328	MACS_peak_161123	1891.89	331	chr6:125123998-125124328+	1891.89	14.38	5.73	NA	novel	ENSMUST00000056889	Chd4	intronic	331
chr1	66380696	66381472	MACS_peak_4024	1797.8	776	chr1:66380697-66399417+	1797.8	7.21	9.27	NA	novel	NM_008632	Map2	sense overlapping	18721
chr19	28545245	28547085	MACS_peak_95242	1740.85	1840	chr19:28530873-28548423-	1740.85	67.92	5.56	NA	novel	NM_175459	Glis3	sense overlapping	17551
chr4	120094375	120099450	MACS_peak_134868	1725.11	5075	chr4:120093964-120103854+	1725.11	14.59	4.71	mmu_circ_0011118	circBase	NM_010657	Hivep3	exonic	5630
chr18	80970984	80974629	MACS_peak_94135	1709.58	3645	chr18:80969275-80974629-	1709.58	8.39	4.68	NA	novel	NM_178280	Sall3	sense overlapping	5355
chr5	100408033	100408113	MACS_peak_147611	1708.94	80	chr5:100378828-100408113-	1708.94	16.46	4.66	NA	novel	NM_026969	Sec31a	exonic	2500
chr4	138125809	138126634	MACS_peak_137692	1665.17	825	chr4:138120346-138126634+	1665.17	8.01	4.71	4_137682549_137676261_-6288|13.45|1|2	PMID:25714049	NM_172703	Eif4g3	exonic	934
chr12	71067245	71067797	MACS_peak_40590	1627.24	552	chr12:71067246-71069918+	1627.24	24.78	5.52	NA	novel	NM_001081195	Arid4a	sense overlapping	2673
chr19	6532142	6532308	MACS_peak_86274	1597.56	166	chr19:6532143-6532308+	1597.56	6.24	8.99	NA	novel	ENSMUST00000113459	Nrxn2	intronic	166
chr1	152845293	152846453	MACS_peak_9793	1596.87	1160	chr1:152845294-152848760-	1596.87	23.89	5.53	NA	novel	NM_001005507	Smg7	sense overlapping	3467
chr9	107767542	107767708	MACS_peak_200069	1486.56	166	chr9:107765495-107767708-	1486.56	9.98	4.83	9_107670039_107667826_-2213|12.90|5|7	PMID:25714049	NM_148930	Rbm5	exonic	322
chr1	135471017	135471368	MACS_peak_9125	1434.45	351	chr1:135471018-135532396-	1434.45	8.39	4.72	NA	novel	NM_173437	Nav1	sense overlapping	61379
chr3	75894834	75895137	MACS_peak_118329	1421.77	303	chr3:75894835-75898132-	1421.77	15.86	5.59	mmu_circ_0010789	circBase	NM_175193	Golim4	exonic	465
chr2	32204008	32204324	MACS_peak_103163	1300.98	316	chr2:32199001-32204324+	1300.98	6.54	4.64	2_32059844_32054521_-5323|17.91|4|4	PMID:25714049	NM_172661	Prrc2b	exonic	600
chr2	6716095	6717814	MACS_peak_98948	1295.4	1719	chr2:6664115-6747946-	1295.4	15.47	5.38	NA	novel	NM_010160	Celf2	sense overlapping	83832
chr12	85028770	85030887	MACS_peak_42396	1256.52	2117	chr12:85028770-85034034+	1256.52	9.13	5.25	mmu_circ_0000402	circBase	NM_178363	Ylpm1	exonic	2236
chr15	82169737	82170154	MACS_peak_68492	1251.74	417	chr15:82169738-82182257+	1251.74	7.68	4.83	NA	novel	NM_033218	Srebf2	exonic	1917
chr16	17655677	17655805	MACS_peak_73120	1203.15	128	chr16:17655444-17663496-	1203.15	11.04	4.77	NA	novel	NM_033609	Med15	exonic	376
chr8	48417007	48417245	MACS_peak_178918	1194.82	238	chr8:48367311-48417245-	1194.82	15.39	5.49	8_49502599_49452665_-49934|22.29|17|72	PMID:25714049	NM_011857	Tenm3	exonic	600
chr18	78856483	78859931	MACS_peak_93885	1178.55	3448	chr18:78856484-78859931-	1178.55	5.38	4.78	mmu_circ_0000902	circBase	NM_053099	Setbp1	exonic	3448
chr8	93950301	93950431	MACS_peak_182461	1165.5	130	chr8:93944198-93950431+	1165.5	9.28	5.54	8_96474331_96468098_-6233|23.59|4|7	PMID:25714049	NM_010308	Gnao1	exonic	420
chr10	7919113	7920614	MACS_peak_14174	1150.96	1501	chr10:7919114-7920614-	1150.96	8.78	4.69	10_7640412_7638912_-1500|17.44|2|5	PMID:25714049	NM_138667	Tab2	exonic	1501
chr5	66998453	66999587	MACS_peak_145503	1120.46	1134	chr5:66997120-67002649-	1120.46	7.64	4.75	NA	novel	NM_001001980	Limch1	antisense	5530
chr12	3834601	3835458	MACS_peak_37207	1087.87	857	chr12:3829944-3873428+	1087.87	14.91	4.67	NA	novel	NM_007872	Dnmt3a	sense overlapping	43485
chr10	43020069	43021331	MACS_peak_16743	1067.93	1262	chr10:43004078-43021331-	1067.93	13.11	4.65	NA	novel	NM_175407	Sobp	sense overlapping	17254
chr1	38536501	38537139	MACS_peak_2321	1047.14	638	chr1:38497062-38539001-	1047.14	15.34	4.75	NA	novel	NM_001290814	Aff3	sense overlapping	41940
chr9	110064227	110064449	MACS_peak_200426	1014.3	222	chr9:110026101-110068985+	1014.3	11.14	4.67	9_109971489_109928605_-42884|16.04|2|2	PMID:25714049	NM_008633	Map4	exonic	2486
chr7	127541241	127542707	MACS_peak_176969	969.71	1466	chr7:127528396-127549735+	969.71	7.11	4.61	NA	novel	NM_001304266	Srcap	exonic	4996
chr11	74836364	74837723	MACS_peak_30275	967.55	1359	chr11:74836365-74837723+	967.55	14.08	4.61	NA	novel	NM_010813	Mnt	sense overlapping	1359
chr1	34199291	34199558	MACS_peak_1849	960.32	267	chr1:34197201-34249638+	960.32	6.12	5.25	NA	novel	NM_133833	Dst	exonic	5742
chr4	118268989	118269317	MACS_peak_134634	919.37	328	chr4:118257612-118269317-	919.37	10.65	4.58	NA	novel	NM_011213	Ptprf	sense overlapping	11706
chr16	34053395	34054895	MACS_peak_73441	916.83	1500	chr16:33975331-34054895+	916.83	15.85	5.41	NA	novel	NM_177357	Kalrn	antisense	79565
chr2	29227456	29228410	MACS_peak_92828	899.66	954	chr2:29207418-29248878-	899.66	14.31	8.23	NA	novel	NM_133500	Ntng2	sense overlapping	41461
chr2	161041984	161042132	MACS_peak_113841	857.14	148	chr2:161039194-161042132-	857.14	17.1	4.49	mmu_circ_0009540	circBase	NM_173368	Chd6	exonic	298
chr3	126941153	126944075	MACS_peak_112258	849.56	2922	chr3:126922118-126944075-	849.56	5.45	8.48	NA	novel	NM_178655	Ank2	sense overlapping	21958
chr5	28338995	28339308	MACS_peak_139784	839.49	313	chr5:28331111-28339308+	839.49	10.53	5.53	5_28665848_28657651_-8197|14.30|10|18	PMID:25714049	NM_028234	Rbm33	exonic	518
chr18	54865780	54866506	MACS_peak_90043	828.52	726	chr18:54802617-54900300-	828.52	23.93	5.63	NA	novel	NM_175751	Zfp608	sense overlapping	97684
chr2	24635095	24635108	MACS_peak_100142	824.83	13	chr2:24631899-24639210-	824.83	10.79	5.61	mmu_circ_0000990	circBase	NM_001042528	Cacna1b	exonic	548
chr7	49452398	49453506	MACS_peak_169875	805.82	1108	chr7:49420174-49491491+	805.82	6.23	4.64	NA	novel	NM_175272	Nav2	exonic	2007
chr7	44883922	44884118	MACS_peak_169171	767.62	196	chr7:44883204-44884118-	767.62	7.28	4.69	NA	novel	ENSMUST00000003049	Med25	intronic	915
chrX	71117480	71119394	MACS_peak_203911	766.98	1914	chrX:71101485-71121468+	766.98	8.37	4.69	mmu_circ_0016337	circBase	NM_001081354	Mamld1	exonic	2184
chr3	84903500	84904079	MACS_peak_109246	758.69	579	chr3:84863964-84904079+	758.69	10.65	9.13	3_84708001_84667886_-40115|17.73|21|64	PMID:25714049	NM_001177773	Fbxw7	exonic	691
chr2	59920294	59920538	MACS_peak_103625	754.14	244	chr2:59907439-59932170-	754.14	11.65	5.79	2_59770227_59745496_-24731|17.61|8|27	PMID:25714049	NM_001001182	Baz2b	exonic	2765
chr6	149531290	149531486	MACS_peak_166123	743.21	196	chr6:149531291-149531486+	743.21	15.89	4.67	NA	novel	ENSMUST00000003544	Bicd1	intronic	196
chr2	165812348	165812858	MACS_peak_112636	696.64	510	chr2:165791905-165875775-	696.64	14.08	5.94	NA	novel	NM_027230	Zmynd8	exonic	3521
chr5	51498033	51498228	MACS_peak_144647	676.49	195	chr5:51490017-51498228-	676.49	14.65	4.68	mmu_circ_0012681	circBase	NM_008904	Ppargc1a	exonic	646
chr12	3388134	3388257	MACS_peak_37102	674.63	123	chr12:3387552-3390554+	674.63	11.47	4.67	12_3390554_3387552_-3002|17.39|8|16	PMID:25714049	NM_008445	Kif3c	exonic	461
chr18	5772231	5773094	MACS_peak_86367	670.91	863	chr18:5705043-5773094+	670.91	13.09	5.93	18_5773092_5705041_-68051|13.10|7|16	PMID:25714049	NM_011546	Zeb1	sense overlapping	68052
chr5	146468258	146468435	MACS_peak_154246	656.7	177	chr5:146468259-146468435+	656.7	17.17	4.63	NA	novel	NM_145155	Wasf3	sense overlapping	177
chr5	110653222	110654258	MACS_peak_145771	620.65	1036	chr5:110653223-110720843-	620.65	14.46	6.08	NA	novel	NM_029337	Ep400	sense overlapping	67621
chr8	79371783	79372364	MACS_peak_167108	608.37	581	chr8:79343654-79372364-	608.37	6.86	8.96	8_81896263_81867553_-28710|22.15|7|8	PMID:25714049	NM_008539	Smad1	exonic	1435
chr2	153392840	153392934	MACS_peak_112715	604.16	94	chr2:153391529-153392934+	604.16	17.55	4.81	NA	novel	NM_001039939	Asxl1	exonic	313
chr11	36300195	36300430	MACS_peak_26689	601.25	235	chr11:36273231-36300430-	601.25	8.74	4.81	11_36113932_36086733_-27199|22.83|2|2	PMID:25714049	NM_011856	Tenm2	exonic	474
chrX	74036924	74037332	MACS_peak_204150	596.51	408	chrX:74035348-74037332-	596.51	8.35	4.87	X_71282671_71280687_-1984|11.24|12|41	PMID:25714049	NM_010788	Mecp2	sense overlapping	1985
chr10	42828747	42829039	MACS_peak_16794	593.44	292	chr10:42783442-42829039+	593.44	7.23	6.17	10_42548845_42503248_-45597|19.00|12|29	PMID:25714049	NM_153055	Sec63	sense overlapping	45598
chr5	117554960	117555477	MACS_peak_149921	572.73	517	chr5:117554961-117555477+	572.73	11.2	4.82	5_118005486_118004970_-516|16.90|3|3	PMID:25714049	NM_001114545	Ksr2	exonic	517
chr10	75717171	75717485	MACS_peak_19162	570.27	314	chr10:75713453-75717485-	570.27	24.03	4.8	NA	novel	NM_172549	Cabin1	sense overlapping	4033
chr4	44167189	44168067	MACS_peak_129092	570.08	878	chr4:44133640-44187519-	570.08	13.94	4.8	NA	novel	NM_175201	Rnf38	sense overlapping	53880
chr10	59086659	59086916	MACS_peak_17659	567.18	257	chr10:59083448-59104491+	567.18	13.96	4.77	10_58567239_58546196_-21043|19.92|11|47	PMID:25714049	NM_172788	Sh3rf3	exonic	748
chr14	21664456	21664748	MACS_peak_55696	560.82	292	chr14:21626719-21664748+	560.82	6.98	4.81	14_22483970_22445941_-38029|15.05|22|129	PMID:25714049	NM_017479	Kat6b	exonic	1629
chr11	53368074	53368786	MACS_peak_27639	548.98	712	chr11:53368075-53368786+	548.98	7.84	6.31	11_53182288_53181577_-711|14.88|8|15	PMID:25714049	NM_033565	Aff4	sense overlapping	712
chr14	32526148	32526878	MACS_peak_56104	534.53	730	chr14:32518943-32541354+	534.53	9.29	6.3	NA	novel	NM_001081221	Ercc6	exonic	1092
chr4	154528581	154528931	MACS_peak_139996	531.61	350	chr4:154476639-154528931-	531.61	10.77	4.83	4_153903040_153850748_-52292|19.99|3|7	PMID:25714049	NM_027504	Prdm16	exonic	398
chr1	56871311	56871784	MACS_peak_3399	529.57	473	chr1:56831439-56871784-	529.57	8.53	4.81	mmu_circ_0008810	circBase	NM_139146	Satb2	exonic	1040
chr13	93498301	93498490	MACS_peak_52391	518.33	189	chr13:93498302-93498490-	518.33	11.79	4.76	NA	novel	NM_021310	Jmy	sense overlapping	189
chr5	123630238	123631169	MACS_peak_150917	512.04	931	chr5:123590793-123642616-	512.04	6.35	4.73	5_124092625_124040802_-51823|20.23|7|11	PMID:25714049	NM_019765	Clip1	exonic	2504
chr5	121797318	121798729	MACS_peak_150506	509.31	1411	chr5:121797319-121802265+	509.31	11.85	4.72	NA	novel	NM_009125	Atxn2	sense overlapping	4947
chr1	13221306	13221479	MACS_peak_576	494.37	173	chr1:13221307-13224713-	494.37	14.61	4.8	mmu_circ_0000010	circBase	NM_008678	Ncoa2	exonic	278
chr11	77199726	77200153	MACS_peak_30483	492.36	427	chr11:77113608-77200153-	492.36	16.37	6.76	11_77013655_76927110_-86545|19.12|2|4	PMID:25714049	NM_176965	Efcab5	sense overlapping	86546
chr11	78009400	78009794	MACS_peak_28235	480.24	394	chr11:78006727-78009794+	480.24	6.38	9.73	mmu_circ_0000298	circBase	NM_174852	Phf12	exonic	467
chr18	36575018	36575169	MACS_peak_88644	480.05	151	chr18:36575019-36581215+	480.05	10.05	6.91	18_36740869_36734673_-6196|15.10|5|6	PMID:25714049	NM_175375	Ankhd1	exonic	456
chr19	45767393	45768007	MACS_peak_98512	476.17	614	chr19:45761104-45777017-	476.17	8.6	4.77	NA	novel	NM_023799	Mgea5	exonic	1826
chr14	26459911	26460174	MACS_peak_55267	467.07	263	chr14:26459904-26460174-	467.07	9.48	6.98	NA	novel	NM_032008	Slmap	sense overlapping	271
chr5	103783123	103783244	MACS_peak_147960	461.01	121	chr5:103783124-103784513+	461.01	10.95	4.83	mmu_circ_0011938	circBase	NM_133919	Aff1	exonic	979
chr1	165906521	165907071	MACS_peak_11247	460.28	550	chr1:165875382-165915163-	460.28	25.19	4.89	NA	novel	NM_011137	Pou2f1	sense overlapping	39782
chr9	53204058	53204530	MACS_peak_194801	458.71	472	chr9:53117153-53204530-	458.71	8.46	4.91	9_53012635_52925258_-87377|18.37|5|5	PMID:25714049	NM_029936	Ddx10	exonic	948
chr1	125981382	125981697	MACS_peak_7871	458.48	315	chr1:125981383-125981697-	458.48	24.23	7.06	1_127878274_127877960_-314|18.86|5|9	PMID:25714049	NM_172484	Nckap5	exonic	315
chr6	5057457	5057578	MACS_peak_151787	453.94	121	chr6:5045936-5077615+	453.94	9.95	7.16	6_5027615_4995936_-31679|18.34|15|43	PMID:25714049	NM_181595	Ppp1r9a	exonic	495
chr6	85347779	85348455	MACS_peak_160493	453.71	676	chr6:85347780-85348991-	453.71	12.82	4.98	6_85298985_85297774_-1211|21.94|15|34	PMID:25714049	NM_177466	Rab11fip5	exonic	1113
chr3	69102203	69102248	MACS_peak_118106	444.81	45	chr3:69089776-69102248-	444.81	7.43	7.29	NA	novel	NM_008467	Kpna4	exonic	702
chr4	130727997	130728164	MACS_peak_133894	443.54	167	chr4:130668925-130728164+	443.54	11.61	7.3	4_130284079_130224840_-59239|14.02|11|14	PMID:25714049	NM_030722	Pum1	exonic	898
chr18	35610870	35611034	MACS_peak_89798	436.78	164	chr18:35610871-35613502+	436.78	9.96	5.05	mmu_circ_0000861	circBase	NM_026420	Paip2	exonic	344
chr9	70579281	70579431	MACS_peak_197159	421.69	150	chr9:70559037-70579431+	421.69	4.68	5.22	NA	novel	NM_025690	Sltm	exonic	1127
chr1	93016308	93016819	MACS_peak_6580	417.85	511	chr1:93016309-93016819-	417.85	5.3	5.21	NA	novel	NM_008440	Kif1a	sense overlapping	511
chr11	75139192	75139369	MACS_peak_30124	413.81	177	chr11:75139193-75156314+	413.81	8.89	7.52	NA	novel	NM_001002764	Smg6	exonic	478
chr6	38818229	38819313	MACS_peak_157510	412.34	1084	chr6:38818230-38819313-	412.34	9.53	5.18	mmu_circ_0001468	circBase	NM_010433	Hipk2	exonic	1084
chr11	107670034	107670858	MACS_peak_34767	408.71	824	chr11:107670035-107686862+	408.71	11.33	5.2	NA	novel	NM_198298	Helz	sense overlapping	16828
chr3	56004533	56005550	MACS_peak_119468	399.29	1017	chr3:55967912-56058830-	399.29	5.59	5.27	3_55862752_55771834_-90918|16.13|10|12	PMID:25714049	NM_030595	Nbea	exonic	4127
chr17	5040579	5040774	MACS_peak_79383	393.17	195	chr17:5040580-5097732+	393.17	7.21	5.26	17_5097732_5040580_-57152|20.18|2|2	PMID:25714049	NM_001085355	Arid1b	exonic	354
chr18	31674354	31674496	MACS_peak_89304	385.49	142	chr18:31653502-31677477+	385.49	9.09	5.26	NA	novel	NM_172965	Sap130	exonic	733
chr11	62373075	62373622	MACS_peak_29002	385.11	547	chr11:62349353-62391033-	385.11	8.42	5.26	11_62204535_62162855_-41680|11.79|2|2	PMID:25714049	NM_001252313	Ncor1	exonic	2492
chr4	122871396	122871497	MACS_peak_135081	378.49	101	chr4:122861934-122872456-	378.49	7.82	5.31	NA	novel	NM_007598	Cap1	exonic	1354
chr4	55370203	55370472	MACS_peak_127676	377.39	269	chr4:55366777-55370472+	377.39	5.47	7.94	4_55383344_55379649_-3695|21.42|16|41	PMID:25714049	NM_009011	Rad23b	exonic	431
chr17	70761074	70761445	MACS_peak_85582	371.25	371	chr17:70761075-70766089+	371.25	8.64	5.43	mmu_circ_0000810	circBase	NM_027712	Dlgap1	exonic	463
chr17	29849156	29849426	MACS_peak_82200	367.32	270	chr17:29849157-29850688-	367.32	9.31	5.46	17_29987633_29986102_-1531|12.93|6|9	PMID:25714049	NM_001081160	Mdga1	exonic	600
chr5	148076179	148078558	MACS_peak_139451	366.54	2379	chr5:148076180-148083197+	366.54	11.01	10.43	5_148894773_148887756_-7017|17.66|8|14	PMID:25714049	NM_029920	Mtus2	exonic	2620
chr8	79139358	79140675	MACS_peak_180962	360.06	1317	chr8:79118175-79180211-	360.06	15.18	8.29	NA	novel	NM_178267	Zfp827	antisense	62037
chr7	110313840	110314022	MACS_peak_171400	356.94	182	chr7:110313841-110314022-	356.94	9.58	8.3	NA	novel	NM_177324	Sbf2	sense overlapping	182
chr4	128786892	128787220	MACS_peak_136122	341.15	328	chr4:128785970-128790313-	341.15	5.87	5.69	NA	novel	NM_001081098	Zfp362	exonic	864
chr8	127426521	127426753	MACS_peak_189869	340.8	232	chr8:127376744-127474615+	340.8	7.72	5.7	8_129998515_129900644_-97871|22.26|2|2	PMID:25714049	NM_033620	Pard3	exonic	2011
chr18	34803449	34804049	MACS_peak_89691	335.71	600	chr18:34795675-34813561+	335.71	9.48	5.77	NA	novel	NM_001081256	Kdm3b	exonic	2725
chr11	6193153	6193476	MACS_peak_22742	318.7	323	chr11:6193154-6193476-	318.7	7.43	11.25	mmu_circ_0000229	circBase	NM_173748	Nudcd3	exonic	323
chr9	59454379	59454667	MACS_peak_191212	317.62	288	chr9:59426123-59467864-	317.62	13.46	8.86	NA	novel	NM_019927	Arih1	sense overlapping	41742
chrX	69544408	69545269	MACS_peak_203850	317.2	861	chrX:69523436-69545269+	317.2	11.08	6.06	X_66798444_66776611_-21833|16.61|2|2	PMID:25714049	NM_008032	Aff2	exonic	994
chr4	129197112	129197288	MACS_peak_122917	307.11	176	chr4:129196830-129197288+	307.11	12.27	11.4	4_128874532_128874074_-458|16.02|3|3	PMID:25714049	NM_134151	Yars	exonic	323
chr12	34389244	34389462	MACS_peak_39210	305.09	218	chr12:34373878-34402867-	305.09	7.57	6.05	12_35087732_35058743_-28989|15.20|7|11	PMID:25714049	NM_001271386	Hdac9	exonic	929
chr17	81432643	81432774	MACS_peak_85063	303.12	131	chr17:81388810-81445593-	303.12	6.13	9.14	17_81844933_81788150_-56783|18.61|18|123	PMID:25714049	NM_001286684	Slc8a1	exonic	995
chr5	30792292	30793134	MACS_peak_142803	299.55	842	chr5:30792293-30793978+	299.55	5.53	6.08	NA	novel	NM_023047	Dpysl5	sense overlapping	1686
chr5	99962323	99962581	MACS_peak_133153	298.68	258	chr5:99961293-99962581-	298.68	6.44	11.35	NA	novel	NM_007516	Hnrnpd	sense overlapping	1289
chr17	91087954	91089605	MACS_peak_87476	293.74	1651	chr17:91087955-91089605-	293.74	8.75	6.14	17_91488945_91487295_-1650|19.55|7|7	PMID:25714049	NM_020252	Nrxn1	exonic	1651
chrX	152618750	152619616	MACS_peak_206866	290.59	866	chrX:152612383-152623335-	290.59	7.82	6.15	X_149057878_149046926_-10952|15.88|4|4	PMID:25714049	NM_172441	Shroom2	sense overlapping	10953
chr9	110173880	110174005	MACS_peak_200457	289.98	125	chr9:110167605-110174005+	289.98	6.11	6.18	NA	novel	NM_009211	Smarcc1	exonic	373
chr2	104775579	104776496	MACS_peak_106782	288.43	917	chr2:104770043-104788845-	288.43	10.66	9.52	NA	novel	NM_001123327	Qser1	sense overlapping	18803
chr13	59500013	59500702	MACS_peak_49708	287.3	689	chr13:59460469-59504310-	287.3	6.44	9.56	13_59605671_59561830_-43841|11.44|7|9	PMID:25714049	NM_023328	Agtpbp1	exonic	2294
chr8	70401990	70403523	MACS_peak_183974	284.29	1533	chr8:70397746-70409011+	284.29	12.56	6.28	NA	novel	NM_001004062	Crtc1	antisense	11266
chr12	3496096	3497054	MACS_peak_36509	282.46	958	chr12:3442474-3502368+	282.46	7.69	9.66	12_3502368_3442474_-59894|17.28|4|5	PMID:25714049	NM_172421	Asxl2	sense overlapping	59895
chr13	35815908	35816575	MACS_peak_48443	280.58	667	chr13:35790101-35816575+	280.58	7.19	6.34	13_35908444_35881970_-26474|12.74|11|36	PMID:25714049	NM_009881	Cdyl	exonic	742
chr2	104208081	104208206	MACS_peak_106662	280.1	125	chr2:104192435-104214275-	280.1	17.68	9.79	2_104054432_104032592_-21840|18.91|13|66	PMID:25714049	NM_001033347	D430041D05Rik	exonic	837
chr4	129838977	129839862	MACS_peak_136312	278.27	885	chr4:129838978-129847868+	278.27	7.86	6.38	NA	novel	NM_008974	Ptp4a2	sense overlapping	8891
chr15	78987891	78987948	MACS_peak_67834	277.3	57	chr15:78987892-79003792+	277.3	14.73	6.39	NA	novel	NM_138579	Triobp	exonic	1578
chr12	69322100	69322350	MACS_peak_41042	274.01	250	chr12:69318027-69322350-	274.01	6.77	6.46	NA	novel	NM_025441	Nemf	exonic	497
chr4	104599079	104599254	MACS_peak_120383	273.39	175	chr4:104599080-104599254+	273.39	20.04	11.83	NA	novel	ENSMUST00000106826	Dab1	intronic	175
chr3	51855498	51857076	MACS_peak_107558	273.34	1578	chr3:51855499-51857076-	273.34	5.73	11.83	mmu_circ_0001126	circBase	NM_001004176	Maml3	exonic	1578
chr15	83116141	83116490	MACS_peak_62295	273.19	349	chr15:83116142-83116490-	273.19	6.06	11.82	NA	novel	ENSMUST00000166766	Rrp7a	intronic	349
chr8	124295357	124295451	MACS_peak_171246	269.36	94	chr8:124295358-124305668+	269.36	6.62	11.88	mmu_circ_0001733	circBase	NM_139272	Galnt2	exonic	248
chr1	186739603	186739863	MACS_peak_13106	267.42	260	chr1:186736116-186739863-	267.42	8.22	10.22	1_188563742_188559995_-3747|19.47|15|35	PMID:25714049	NM_026041	Rrp15	exonic	557
chr11	43704533	43705477	MACS_peak_26848	265.85	944	chr11:43704534-43705477+	265.85	9.6	10.29	mmu_circ_0000254	circBase	NM_001164231	Pwwp2a	exonic	944
chrX	160833867	160834834	MACS_peak_187150	264.13	967	chrX:160808475-160847017-	264.13	4.88	12.03	NA	novel	NM_001024624	Cdkl5	exonic	1969
chr11	98694137	98694293	MACS_peak_33392	263.37	156	chr11:98693383-98694293+	263.37	5.25	6.6	11_98555607_98554697_-910|17.53|2|3	PMID:25714049	NM_009439	Psmd3	exonic	495
chr14	120324793	120325412	MACS_peak_62328	262.71	619	chr14:120324794-120325412+	262.71	6.81	6.59	14_120724634_120724016_-618|16.50|17|64	PMID:25714049	NM_175341	Mbnl2	exonic	619
chr7	37962251	37962848	MACS_peak_168807	262.08	597	chr7:37959255-37969697-	262.08	11.76	6.6	7_38754716_38744274_-10442|17.80|5|6	PMID:25714049	NM_011274	Uri1	sense overlapping	10443
chr6	127475217	127475673	MACS_peak_164457	257.27	456	chr6:127468032-127491890+	257.27	18.06	6.64	6_127441908_127418050_-23858|17.43|15|50	PMID:25714049	NM_181402	Parp11	sense overlapping	23859
chr15	100936270	100936600	MACS_peak_69759	256.76	330	chr15:100936271-100936600+	256.76	10.64	10.46	15_100767031_100766702_-329|16.82|9|21	PMID:25714049	NM_011323	Scn8a	exonic	330
chr10	69990686	69990878	MACS_peak_18607	255.31	192	chr10:69990687-69990878+	255.31	4.78	6.66	NA	novel	ENSMUST00000047061	Ank3	intronic	192
chr11	24085320	24085650	MACS_peak_23584	250.44	330	chr11:24085321-24085650+	250.44	4.92	12.51	11_23985650_23985321_-329|16.41|10|24	PMID:25714049	NM_016707	Bcl11a	exonic	330
chr13	105181449	105181675	MACS_peak_52471	250.31	226	chr13:105167528-105181675-	250.31	8.34	10.73	mmu_circ_0004425	circBase	NM_027934	Rnf180	exonic	352
chr12	4416670	4416805	MACS_peak_37362	248.93	135	chr12:4335781-4416805-	248.93	8.42	6.77	12_4416805_4335781_-81024|24.49|10|19	PMID:25714049	NM_010881	Ncoa1	exonic	655
chr7	62190716	62191201	MACS_peak_170782	248.04	485	chr7:62190717-62193593-	248.04	9.48	6.8	7_69338479_69335603_-2876|17.83|4|4	PMID:25714049	uc009hfe.1	AK086712	exonic	727
chr15	95241536	95241677	MACS_peak_69970	246.07	141	chr15:95229084-95241677-	246.07	9.33	6.79	15_95072108_95059515_-12593|19.15|10|32	PMID:25714049	NM_001289653	Nell2	exonic	737
chr8	18632307	18632643	MACS_peak_180598	243.6	336	chr8:18622607-18641665+	243.6	17.27	6.86	NA	novel	NM_173189	Mcph1	exonic	1645
chr2	9951113	9952945	MACS_peak_100819	243.48	1832	chr2:9940927-9952945-	243.48	5.31	6.86	2_9874572_9862554_-12018|18.79|3|4	PMID:25714049	NM_027748	Taf3	exonic	1915
chr4	62323196	62323295	MACS_peak_128100	241.3	99	chr4:62312258-62323304-	241.3	7.91	10.88	NA	novel	NM_001045528	Fkbp15	exonic	615
chr1	183135354	183135876	MACS_peak_12878	239.72	522	chr1:183135355-183135876-	239.72	14.17	10.89	NA	novel	NM_026866	Disp1	exonic	522
chr9	80087429	80087523	MACS_peak_193431	237.01	94	chr9:80087430-80092412+	237.01	6.69	10.92	9_79940219_79935237_-4982|13.79|8|10	PMID:25714049	NM_146003	Senp6	exonic	298
chr11	94071564	94071686	MACS_peak_32464	235.23	122	chr11:94068936-94071686+	235.23	4.41	10.92	11_93933000_93930250_-2750|15.73|5|9	PMID:25714049	NM_027569	Spag9	exonic	222
chr5	81387774	81387988	MACS_peak_146507	234.12	214	chr5:81387775-81465304+	234.12	6.9	7.04	5_81894329_81816800_-77529|14.66|4|5	PMID:25714049	NM_198702	Adgrl3	exonic	324
chr4	83557898	83558030	MACS_peak_129255	228.27	132	chr4:83535790-83635742+	228.27	15.82	11.27	4_83281646_83181694_-99952|13.17|4|4	PMID:25714049	NM_001081012	Ccdc171	exonic	1425
chr7	61134183	61134591	MACS_peak_167201	226.88	408	chr7:61072717-61134591-	226.88	6.7	11.3	7_68279477_68217603_-61874|13.82|6|9	PMID:25714049	uc009hex.1	DOKist4	sense overlapping	61875
chr18	6479885	6480819	MACS_peak_86445	222.79	934	chr18:6467056-6493578-	222.79	5.3	11.34	NA	novel	ENSMUST00000115870	Epc1	intronic	26523
chr1	132017592	132018462	MACS_peak_8558	222.57	870	chr1:132014383-132019466+	222.57	4.95	7.29	mmu_circ_0008167	circBase	NM_007923	Elk4	exonic	1203
chr10	18121150	18121312	MACS_peak_14984	218	162	chr10:18121151-18122515+	218	10.37	7.35	NA	novel	NM_009048	Reps1	sense overlapping	1365
chr5	108625029	108625091	MACS_peak_145577	215.19	62	chr5:108609391-108625091-	215.19	9.37	11.81	NA	novel	NM_153569	Gak	exonic	596
chr10	62838175	62840378	MACS_peak_18188	212.53	2203	chr10:62832894-62840378-	212.53	5.75	11.91	10_62303126_62295642_-7484|19.94|16|78	PMID:25714049	NM_027384	Tet1	exonic	2388
chr6	22925829	22925895	MACS_peak_155846	210.15	66	chr6:22925830-23000199+	210.15	4.42	7.54	6_22950199_22875830_-74369|14.03|7|7	PMID:25714049	uc012eim.1	Ptprz1	exonic	2229
chr2	62714584	62714841	MACS_peak_105560	210.03	257	chr2:62702916-62777681-	210.03	11.31	7.5	2_62615738_62540973_-74765|17.58|8|13	PMID:25714049	NM_133207	Kcnh7	sense overlapping	74766
chr15	34958865	34959076	MACS_peak_63725	194.6	211	chr15:34945006-35008298-	194.6	6.85	12.6	15_34938053_34874761_-63292|14.46|2|2	PMID:25714049	NM_019635	Stk3	exonic	651
chr17	27988719	27988916	MACS_peak_74294	194.49	197	chr17:27974905-27988916+	194.49	10.01	14.39	NA	novel	NM_181413	Anks1	exonic	1075
chr5	32835615	32835688	MACS_peak_140379	194.28	73	chr5:32819866-32835688-	194.28	10.47	12.6	mmu_circ_0001333	circBase	NM_194340	Prr14l	exonic	5072
chr5	142868701	142868874	MACS_peak_150706	192.81	173	chr5:142868702-142868874-	192.81	11.14	12.66	NA	novel	ENSMUST00000110766	Fbxl18	sense overlapping	173
chr1	63085667	63086398	MACS_peak_4083	192.58	731	chr1:63065704-63086398-	192.58	7.18	12.65	NA	novel	NM_001081436	Ino80d	exonic	1309
chr15	64149605	64149675	MACS_peak_66469	191.66	70	chr15:64149606-64173292-	191.66	8.31	7.97	NA	novel	NM_010026	Asap1	exonic	720
chr6	31458954	31459067	MACS_peak_153456	184.64	113	chr6:31426714-31468343+	184.64	15.59	13.15	6_31418343_31376714_-41629|15.27|4|4	PMID:25714049	NM_013791	Mkln1	exonic	1005
chr1	84814822	84814969	MACS_peak_5675	181.88	147	chr1:84782827-84814969-	181.88	5.25	13.34	1_84811544_84779402_-32142|18.03|13|23	PMID:25714049	NM_133975	Trip12	exonic	1193
chr2	121207698	121208129	MACS_peak_109777	181.67	431	chr2:121198976-121211422-	181.67	5.6	8.19	2_121037158_121024712_-12446|17.90|13|22	PMID:25714049	NM_013735	Trp53bp1	exonic	2071
chr18	6099825	6100170	MACS_peak_86405	179.78	345	chr18:6073211-6112439-	179.78	13.66	13.32	NA	novel	ENSMUST00000182178	Arhgap12	intronic	39229
chr6	134222864	134223029	MACS_peak_164763	178.37	165	chr6:134137285-134233653+	178.37	13.54	8.2	NA	novel	NM_007961	Etv6	exonic	433
chr5	112428470	112428686	MACS_peak_148992	176.93	216	chr5:112428471-112428877-	176.93	9.61	8.26	NA	novel	NM_001253917	Sez6l	intronic	407
chr2	156251319	156252021	MACS_peak_111332	176.78	702	chr2:156247726-156254310+	176.78	13.27	13.45	NA	novel	NM_172674	Phf20	sense overlapping	6585
chr5	31530632	31530755	MACS_peak_140208	175.89	123	chr5:31530633-31536324+	175.89	7.08	13.48	5_31838697_31833006_-5691|19.42|3|3	PMID:25714049	NM_009206	Slc4a1ap	exonic	742
chr14	64825600	64825894	MACS_peak_58368	171.08	294	chr14:64825601-64828668+	171.08	10.66	13.76	NA	novel	NM_177338	Hmbox1	antisense	3068
chr8	80800100	80800395	MACS_peak_184934	166.86	295	chr8:80784627-80800395-	166.86	4.53	8.62	8_83324294_83308526_-15768|17.58|11|16	PMID:25714049	NM_021356	Gab1	exonic	1516
chr7	7296723	7296878	MACS_peak_166529	165.47	155	chr7:7295970-7296878-	165.47	10.6	8.67	7_7249589_7248681_-908|17.71|11|32	PMID:25714049	NM_011334	Clcn4-2	exonic	255
chr4	102927460	102927585	MACS_peak_132992	165.1	125	chr4:102908808-102934605+	165.1	10.21	8.67	NA	novel	NM_001285852	Sgip1	exonic	1141
chr10	14080241	14080510	MACS_peak_14858	164.93	269	chr10:14004201-14086082+	164.93	9.4	8.7	mmu_circ_0000147	circBase	NM_010437	Hivep2	sense overlapping	81882
chr1	178678825	178679359	MACS_peak_11342	160.97	534	chr1:178678826-178679359+	160.97	7.8	15.84	mmu_circ_0000120	circBase	NM_001161665	Kif26b	exonic	534
chr3	40653705	40654253	MACS_peak_118602	160.39	548	chr3:40653706-40654253+	160.39	4.67	8.86	NA	novel	NM_175515	Intu	exonic	548
chr1	55715325	55715801	MACS_peak_3441	159.85	476	chr1:55695745-55719694+	159.85	9.12	14.34	NA	novel	NM_001114663	Plcl1	sense overlapping	23950
chr5	103564010	103564339	MACS_peak_145058	158.86	329	chr5:103559137-103582776+	158.86	7.56	14.42	NA	novel	NM_011204	Ptpn13	exonic	2092
chr1	75244870	75244892	MACS_peak_5060	158.42	22	chr1:75242670-75244892+	158.42	6.82	14.45	NA	novel	NM_020266	Dnajb2	sense overlapping	2223
chr17	43064967	43065233	MACS_peak_75514	157.42	266	chr17:43037595-43065233+	157.42	6.67	15.98	NA	novel	NM_178589	Tnfrsf21	exonic	1413
chr12	72786671	72786789	MACS_peak_40801	150.24	118	chr12:72783683-72786789+	150.24	7.42	14.94	12_73887776_73884670_-3106|15.36|13|25	PMID:25714049	NM_008910	Ppm1a	exonic	972
chr9	45706510	45706665	MACS_peak_189684	148.33	155	chr9:45706511-45706665+	148.33	5.39	15.06	NA	novel	ENSMUST00000034592	Dscaml1	intronic	155
chr8	3258382	3258934	MACS_peak_175154	146.02	552	chr8:3258383-3258934-	146.02	9.7	15.26	8_3258934_3258383_-551|17.49|20|176	PMID:25714049	NM_010568	Insr	exonic	552
chr18	65622983	65625334	MACS_peak_92476	142.67	2351	chr18:65622984-65625334+	142.67	4.67	9.46	mmu_circ_0000883	circBase	NM_207255	Zfp532	exonic	2351
chr4	126272677	126273196	MACS_peak_133048	140.68	519	chr4:126272678-126275257+	140.68	5.15	15.63	4_125952501_125949922_-2579|16.45|5|6	PMID:25714049	NM_013718	Trappc3	sense overlapping	2580
chr5	147494645	147495047	MACS_peak_151263	140.11	402	chr5:147450653-147503202+	140.11	6.84	15.65	5_148314778_148262229_-52549|11.54|11|19	PMID:25714049	NM_028291	Pan3	sense overlapping	52550
chr17	88462712	88463263	MACS_peak_87153	135.13	551	chr17:88462713-88463263+	135.13	6.31	9.63	17_88862603_88862053_-550|19.42|25|171	PMID:25714049	NM_180974	Foxn2	exonic	551
chr9	122160322	122160535	MACS_peak_197253	134.53	213	chr9:122160323-122164051+	134.53	5.09	16.1	9_122073169_122069441_-3728|13.68|5|8	PMID:25714049	NM_133741	Snrk	exonic	348
chr16	62827163	62827507	MACS_peak_69665	134.26	344	chr16:62827164-62830809-	134.26	6.88	17.53	mmu_circ_0006363	circBase	NM_026577	Arl13b	sense overlapping	3646
chr2	119958269	119958363	MACS_peak_107748	129.65	94	chr2:119951086-119958363+	129.65	8.56	16.55	2_119784099_119776822_-7277|18.59|6|8	PMID:25714049	NM_013720	Mga	exonic	387
chrX	157961253	157961283	MACS_peak_207044	128.87	30	chrX:157919746-157996684-	128.87	6.68	9.91	X_154434616_154357678_-76938|20.46|3|3	PMID:25714049	NM_177751	Cnksr2	exonic	893
chr11	88078402	88078555	MACS_peak_32276	126.63	153	chr11:88073057-88078555+	126.63	7.08	10.02	mmu_circ_0000309	circBase	NM_016686	Vezf1	exonic	1096
chr8	61349399	61349702	MACS_peak_183178	124.33	303	chr8:61349400-61353848+	124.33	10.58	10.16	8_63832645_63828197_-4448|18.22|2|3	PMID:25714049	NM_021506	Sh3rf1	exonic	414
chr5	113550700	113551334	MACS_peak_134680	123.94	634	chr5:113550423-113558463+	123.94	7.94	18.34	5_114008280_114000241_-8039|13.54|14|125	PMID:25714049	ENSMUST00000094452	Wscd2	exonic	1027
chr9	56257526	56260762	MACS_peak_190787	123.89	3236	chr9:56257527-56260762-	123.89	5.25	16.91	mmu_circ_0001776	circBase	NM_172924	Peak1	exonic	3236
chr17	50606294	50606613	MACS_peak_84117	121.97	319	chr17:50606295-50608781+	121.97	4.55	10.35	NA	novel	NM_013880	Plcl2	exonic	2487
chr19	38523735	38525452	MACS_peak_97661	119.2	1717	chr19:38506315-38525452+	119.2	4.78	10.45	NA	novel	NM_019588	Plce1	sense overlapping	19138
chr12	98688189	98689628	MACS_peak_44191	117.86	1439	chr12:98682519-98689628-	117.86	5.55	10.53	NA	novel	NM_011877	Ptpn21	exonic	1799
chr3	148852566	148852860	MACS_peak_125718	117.31	294	chr3:148846849-148859533-	117.31	5.72	10.56	3_148522497_148509813_-12684|13.09|10|13	PMID:25714049	NM_001081298	Adgrl2	exonic	1608
chr1	190799012	190800581	MACS_peak_12333	111.24	1569	chr1:190782535-190844602-	111.24	9.33	19.28	1_192668481_192606414_-62067|18.06|2|3	PMID:25714049	NM_178775	Rps6kc1	exonic	2228
chr4	141485558	141485672	MACS_peak_138272	110.9	114	chr4:141483725-141494398-	110.9	8.66	10.9	mmu_circ_0001291	circBase	NM_019763	Spen	exonic	969
chr1	174608381	174609952	MACS_peak_10971	110.83	1571	chr1:174593061-174612651+	110.83	5.05	19.31	1_176542782_176523192_-19590|17.97|6|7	PMID:25714049	NM_019445	Fmn2	exonic	1772
chr5	34346582	34347383	MACS_peak_140594	110.74	801	chr5:34342522-34351358+	110.74	5.11	18.01	NA	novel	NM_011278	Rnf4	sense overlapping	8837
chr2	103775609	103775765	MACS_peak_106621	109.05	156	chr2:103775417-103776157-	109.05	6	18.3	2_103616314_103615574_-740|13.47|11|14	PMID:25714049	NM_016739	Caprin1	exonic	405
chr1	168209350	168209595	MACS_peak_11436	108.39	245	chr1:168183530-168209595-	108.39	5.82	11.09	1_170139726_170113661_-26065|16.31|2|2	PMID:25714049	NM_008783	Pbx1	exonic	822
chr12	52887889	52888063	MACS_peak_39455	104.78	174	chr12:52887890-52888063+	104.78	7.36	18.81	NA	novel	NM_198111	Akap6	sense overlapping	174
chr10	117367593	117367988	MACS_peak_22851	104.58	395	chr10:117349311-117367988-	104.58	4.59	11.35	10_116805044_116786367_-18677|13.57|9|15	PMID:25714049	NM_001013391	Cpsf6	sense overlapping	18678
chr12	77323844	77323937	MACS_peak_41969	103.98	93	chr12:77277361-77332329+	103.98	7.28	11.15	12_78433316_78378348_-54968|22.57|13|29	PMID:25714049	NM_016893	Fut8	exonic	622
chr7	37479280	37480849	MACS_peak_152572	102.68	1569	chr7:37479281-37480849-	102.68	6.86	20.14	7_38265868_38264300_-1568|20.30|13|42	PMID:25714049	uc009gkk.1	Zfp536	exonic	1569
chr10	7701609	7703120	MACS_peak_13034	101.75	1511	chr10:7697502-7703120+	101.75	3.25	20.27	NA	novel	NM_010690	Lats1	exonic	1659
chr3	89023030	89023210	MACS_peak_119333	100.8	180	chr3:89023031-89033332+	100.8	9.48	19.08	3_88837254_88826953_-10301|10.76|7|9	PMID:25714049	NM_138679	Ash1l	exonic	349
chr19	29784798	29785217	MACS_peak_95431	99.35	419	chr19:29781058-29786449-	99.35	10.12	19.18	NA	novel	ENSMUST00000177155	9930021J03Rik	intronic	5392
chr9	13700758	13701252	MACS_peak_172298	99.22	494	chr9:13697311-13707941+	99.22	9.45	20.54	NA	novel	NM_173776	Maml2	sense overlapping	10631
chr15	27912619	27912734	MACS_peak_58268	99.1	115	chr15:27871161-27912734-	99.1	6.03	20.55	15_27842489_27800916_-41573|19.67|5|9	PMID:25714049	NM_001081302	Trio	exonic	1814
chr5	106628274	106628824	MACS_peak_133795	99.07	550	chr5:106618071-106638635-	99.07	8.19	20.55	mmu_circ_0001379	circBase	NM_026856	Zfp644	sense overlapping	20565
chr3	88854601	88854795	MACS_peak_121419	99	194	chr3:88854602-88863612+	99	5.44	11.57	NA	novel	uc008pxb.1	Gon4l	exonic	954
chr3	103021231	103021554	MACS_peak_122838	98.95	323	chr3:103021232-103021554+	98.95	8.01	11.58	NA	novel	uc008qsj.2	Csde1	intronic	323
chr4	68798687	68798924	MACS_peak_128459	98.61	237	chr4:68792825-68798924-	98.61	7.53	19.38	mmu_circ_0001216	circBase	NM_019967	Brinp1	exonic	460
chr4	87789286	87789386	MACS_peak_119042	98.44	100	chr4:87782287-87794011-	98.44	4.84	20.64	mmu_circ_0001230	circBase	NM_027326	Mllt3	exonic	450
chr10	63004656	63004776	MACS_peak_18215	97.4	120	chr10:62997881-63004776+	97.4	5.6	19.55	NA	novel	NM_027425	Rufy2	exonic	605
chr2	73842359	73842446	MACS_peak_96591	95.07	87	chr2:73842360-73853891-	95.07	5.8	20.8	2_73691948_73680417_-11531|16.42|21|66	PMID:25714049	NM_001025093	Atf2	exonic	726
chr2	156748943	156749356	MACS_peak_111449	94.39	413	chr2:156745835-156749356+	94.39	7.41	19.77	mmu_circ_0001098	circBase	NM_146128	Dlgap4	exonic	864
chr3	141789728	141790073	MACS_peak_113072	91.95	345	chr3:141788871-141791879+	91.95	8.59	21.31	3_141454843_141451835_-3008|25.37|4|8	PMID:25714049	NM_009472	Unc5c	exonic	625
chr6	140524864	140524879	MACS_peak_149509	89.76	15	chr6:140524865-140526561+	89.76	5.15	21.16	6_140475082_140473386_-1696|18.45|6|9	PMID:25714049	NM_144920	Plekha5	exonic	310
chr19	54029501	54029680	MACS_peak_99255	88.77	179	chr19:54029502-54029680+	88.77	5.7	12.23	NA	novel	NM_019658	Shoc2	sense overlapping	179
chr12	81204891	81205016	MACS_peak_41739	88.03	125	chr12:81202243-81205016-	88.03	9.61	20.67	12_82306003_82303230_-2773|18.81|1|2	PMID:25714049	NM_080440	Slc8a3	exonic	501
chr14	18612850	18613161	MACS_peak_54446	88.03	311	chr14:18574307-18630431-	88.03	8.09	20.67	14_19462945_19406821_-56124|17.78|8|17	PMID:25714049	NM_144839	Ube2e2	sense overlapping	56125
chr1	187341486	187341537	MACS_peak_13182	86.43	51	chr1:187341487-187348504+	86.43	4.23	12.56	NA	novel	NM_026367	Gpatch2	sense overlapping	7018
chr13	100137288	100137572	MACS_peak_52071	83.76	284	chr13:100126587-100137572+	83.76	6.18	21.52	13_100907527_100896542_-10985|13.72|2|2	PMID:25714049	NM_011420	Smn1	sense overlapping	10986
chr12	29985664	29985749	MACS_peak_38922	83.28	85	chr12:29985665-29985823+	83.28	7.42	12.94	NA	novel	ENSMUST00000118321	Pxdn	intronic	159
chr10	93973834	93974042	MACS_peak_21545	82.32	208	chr10:93973835-94007094-	82.32	4.32	21.72	NA	novel	NM_172538	Vezt	exonic	1795
chr9	108644932	108644994	MACS_peak_195779	82.18	62	chr9:108644026-108644994-	82.18	3.82	21.78	NA	novel	NM_011790	Arih2	exonic	405
chrX	120620242	120620444	MACS_peak_201275	80.74	202	chrX:120550525-120637624+	80.74	5.06	21.71	NA	novel	NR_073451	Pcdh11x	sense overlapping	87100
chr7	126551974	126552338	MACS_peak_176809	79.49	364	chr7:126551975-126552338-	79.49	2.89	13.01	mmu_circ_0001628	circBase	NM_146200	Eif3c	exonic	364
chr8	91026667	91026887	MACS_peak_182199	79.03	220	chr8:91026668-91030684+	79.03	4.37	22.08	8_93554583_93550567_-4016|12.57|10|10	PMID:25714049	NM_177224	Chd9	exonic	423
chr6	38490196	38491954	MACS_peak_154383	78.66	1758	chr6:38440455-38502408+	78.66	5.05	22.13	6_38452408_38390455_-61953|11.84|11|21	PMID:25714049	NM_177185	Ubn2	sense overlapping	61954
chr7	126152825	126153279	MACS_peak_159862	77.85	454	chr7:126120357-126153279-	77.85	4.78	22.94	NA	novel	NM_028816	Xpo6	exonic	1213
chr12	88794503	88795893	MACS_peak_43519	77.77	1390	chr12:88794504-88795893+	77.77	4.34	13.28	NA	novel	NM_001198587	Nrxn3	exonic	1390
chr16	43572676	43574764	MACS_peak_68879	77.48	2088	chr16:43561713-43577748+	77.48	3.69	22.98	16_43577861_43561826_-16035|15.88|11|42	PMID:25714049	NM_019778	Zbtb20	sense overlapping	16036
chr1	153486541	153486633	MACS_peak_9910	75.98	92	chr1:153486479-153486633-	75.98	5.79	13.54	NA	novel	ENSMUST00000042141	Dhx9	intronic	155
chr19	44941458	44942798	MACS_peak_89046	75.54	1340	chr19:44941459-44949139-	75.54	3.39	23	NA	novel	NM_001081225	Fam178a	antisense	7681
chr1	66778616	66778922	MACS_peak_4336	74.71	306	chr1:66772906-66802168+	74.71	7.2	13.43	NA	novel	ENSMUST00000118992	Gm15789	sense overlapping	29263
chr7	68169896	68170048	MACS_peak_171461	74.54	152	chr7:68164993-68173375+	74.54	5.31	13.47	7_75318261_75309879_-8382|15.37|9|16	PMID:25714049	NM_010513	Igf1r	exonic	610
chr3	90341655	90341994	MACS_peak_121765	71.89	339	chr3:90341656-90341994+	71.89	3.06	13.83	3_90145916_90145578_-338|18.85|18|54	PMID:25714049	uc008qca.1	Gatad2b	exonic	339
chr19	56551758	56551911	MACS_peak_99499	71.21	153	chr19:56551759-56576284+	71.21	7.48	13.92	NA	novel	NM_025811	Nhlrc2	exonic	861
chr4	126882439	126882611	MACS_peak_133170	69.73	172	chr4:126882215-126911284-	69.73	6.76	23.85	4_126588528_126559459_-29069|17.39|9|12	PMID:25714049	NM_001114399	Zmym4	exonic	2618
chr14	34258974	34259263	MACS_peak_51748	69.39	289	chr14:34237416-34259732-	69.39	6.01	23.53	14_35072918_35050602_-22316|15.20|11|16	PMID:25714049	NM_029389	Fam35a	sense overlapping	22317
chr19	32814447	32814670	MACS_peak_95673	68.58	223	chr19:32792549-32819920+	68.58	3.16	24.14	NA	novel	NM_008960	Pten	sense overlapping	27372
chr1	87982008	87982085	MACS_peak_6062	66.78	77	chr1:87975808-87990157-	66.78	4.55	24.22	NA	novel	NM_001033291	Usp40	exonic	1359
chr9	77181351	77181396	MACS_peak_193209	66.15	45	chr9:77138350-77190737-	66.15	8.09	24.46	mmu_circ_0015894	circBase	ENSMUST00000183955	Mlip	exonic	636
chr5	21015714	21015749	MACS_peak_138718	65.86	35	chr5:21014694-21022094-	65.86	2.8	24.57	NA	novel	NM_011203	Ptpn12	exonic	284
chr2	131273910	131274241	MACS_peak_109069	64.66	331	chr2:131273911-131274263+	64.66	4.41	24.82	NA	novel	NM_153501	Pank2	exonic	353
chr4	9281387	9282012	MACS_peak_124677	62.52	625	chr4:9281388-9282012+	62.52	5.59	25.4	4_9209159_9208535_-624|14.70|12|49	PMID:25714049	NM_028940	Clvs1	exonic	625
chr5	33855253	33855736	MACS_peak_140506	62.49	483	chr5:33843112-33855736+	62.49	7.44	25.4	5_34198385_34185761_-12624|16.55|13|32	PMID:25714049	NM_175231	Whsc1	exonic	1439
chrX	134972346	134973607	MACS_peak_185999	62.02	1261	chrX:134972347-134977747-	62.02	7.37	24.81	X_131512286_131506886_-5400|17.37|3|3	PMID:25714049	NM_175446	Zmat1	sense overlapping	5401
chr9	78155356	78155516	MACS_peak_197798	61.8	160	chr9:78150529-78160811+	61.8	5.97	15.35	9_78008618_77998336_-10282|18.51|5|7	PMID:25714049	NM_019987	Ick	exonic	1125
chr2	146870765	146870846	MACS_peak_112155	60.93	81	chr2:146870766-146891284+	60.93	4.78	15.34	2_146717020_146696502_-20518|11.74|4|7	PMID:25714049	NM_001033298	Kiz	exonic	1031
chr17	78335226	78335355	MACS_peak_86023	60.39	129	chr17:78237742-78335355+	60.39	6.56	15.46	17_78734695_78637082_-97613|17.78|15|64	PMID:25714049	NM_015800	Crim1	exonic	1170
chr2	49278580	49279220	MACS_peak_104647	57.74	640	chr2:49272041-49279783+	57.74	5.47	16.13	2_49135303_49127561_-7742|19.67|7|10	PMID:25714049	NM_029924	Mbd5	exonic	2432
chr8	14773233	14773381	MACS_peak_162826	56.83	148	chr8:14773234-14778415+	56.83	6.87	25.29	8_14778415_14773234_-5181|17.25|14|59	PMID:25714049	NM_172910	Dlgap2	exonic	368
chr11	86279592	86279735	MACS_peak_29234	56.14	143	chr11:86278764-86279735-	56.14	3.64	25.74	NA	novel	NM_001080931	Med13	exonic	302
chr3	142839207	142839362	MACS_peak_123149	55.42	155	chr3:142828881-142839362-	55.42	3.79	27.49	3_142502326_142491845_-10481|16.51|2|2	PMID:25714049	NM_178654	Pkn2	exonic	633
chr17	29282677	29282891	MACS_peak_80906	55.11	214	chr17:29277857-29282891+	55.11	4.11	27.53	17_29419836_29414802_-5034|17.10|2|7	PMID:25714049	NM_030561	BC004004	exonic	513
chr1	176749436	176750352	MACS_peak_12143	55	916	chr1:176742552-176774910-	55	4.86	27.54	NA	novel	NR_029775	Mir350	sense overlapping	32359
chr6	135774782	135774908	MACS_peak_149162	52.07	126	chr6:135772193-135780336-	52.07	4.91	26.91	mmu_circ_0001530	circBase	NM_008171	Grin2b	exonic	885
chrX	95051998	95052311	MACS_peak_204857	50.84	313	chrX:95051999-95059060-	50.84	4.66	17.64	X_92254399_92247338_-7061|14.17|12|29	PMID:25714049	NM_001033329	Arhgef9	sense overlapping	7062
chr13	23285243	23285850	MACS_peak_47725	3100	607	chr13:23276284-23316747-	3100	41.84	5.87	NA	novel	NR_126443	4930557F10Rik	sense overlapping	40464
chr2	121457664	121458252	MACS_peak_109831	3100	588	chr2:121457665-121458292+	3100	45.25	5.87	NA	novel	NM_026318	Hypk	sense overlapping	628
chr6	124913792	124917775	MACS_peak_164249	3100	3983	chr6:124913793-124917775-	3100	29.54	5.87	NA	novel	NM_026988	Ptms	sense overlapping	3983
chr6	11933252	11934019	MACS_peak_152131	2914.83	767	chr6:11933253-11934019+	2914.83	13.87	5.74	NA	novel	NM_029404	Phf14	exonic	767
chr1	22534005	22534240	MACS_peak_1088	2226.45	235	chr1:22533399-22538623-	2226.45	14.21	10.29	1_22545462_22540238_-5224|21.84|14|201	PMID:25714049	NM_001012623	Rims1	exonic	646
chr8	84565947	84566393	MACS_peak_181503	2092.34	446	chr8:84556704-84580223+	2092.34	14.85	5.57	8_87104122_87080603_-23519|14.39|5|5	PMID:25714049	NM_007578	Cacna1a	exonic	1925
chr7	122970139	122970561	MACS_peak_176486	1960.69	422	chr7:122970140-122970561+	1960.69	24.02	4.77	NA	novel	ENSMUST00000148880	Rbbp6	intronic	422
chr2	158049956	158051670	MACS_peak_113564	1566.61	1714	chr2:158035996-158075084+	1566.61	25.51	4.78	2_157900820_157861732_-39088|15.94|2|2	PMID:25714049	NM_027434	Rprd1b	sense overlapping	39089
chr10	79864896	79865714	MACS_peak_19755	1468.29	818	chr10:79864897-79865714-	1468.29	17.83	5.56	NA	novel	NR_038088	Bc1	intronic	818
chr6	112804512	112804779	MACS_peak_159582	1278.79	267	chr6:112804513-112804779-	1278.79	23.65	5.31	NA	novel	ENSMUST00000060215	Srgap3	intronic	267
chr4	55072803	55073105	MACS_peak_127660	1103.64	302	chr4:55007348-55073105+	1103.64	10.58	5.41	NA	novel	NM_172867	Zfp462	sense overlapping	65758
chrX	159443723	159444197	MACS_peak_207092	1085.12	474	chrX:159443650-159446098+	1085.12	15.02	4.65	NA	novel	NM_001081124	Map7d2	sense overlapping	2449
chr12	53347770	53349894	MACS_peak_40189	900.09	2124	chr12:53343286-53354434+	900.09	10.64	4.65	NA	novel	uc007nnp.1	Npas3	intronic	11149
chr18	23569561	23569775	MACS_peak_87395	831.15	214	chr18:23535162-23569775+	831.15	15.47	5.6	18_23728276_23693663_-34613|11.33|7|15	PMID:25714049	NM_010087	Dtna	exonic	363
chr3	88555789	88555992	MACS_peak_121330	824.26	203	chr3:88555338-88556919+	824.26	29.7	4.52	3_88360841_88359260_-1581|16.03|5|7	PMID:25714049	NM_033526	Ubqln4	exonic	618
chr7	84370164	84371055	MACS_peak_169189	675.82	891	chr7:84343742-84372647-	675.82	17.34	5.97	NA	novel	NM_007488	Arnt2	sense overlapping	28906
chr10	84397879	84399056	MACS_peak_20576	617.43	1177	chr10:84392256-84422227-	617.43	9.85	4.65	NA	novel	NM_001004363	Nuak1	sense overlapping	29972
chr18	75043078	75043269	MACS_peak_93352	598.59	191	chr18:75043079-75063173+	598.59	13.37	4.84	18_75222827_75202733_-20094|18.64|5|7	PMID:25714049	NM_027727	Dym	exonic	545
chr4	107861135	107861748	MACS_peak_133740	582	613	chr4:107861136-107876081+	582	10.55	4.83	NA	novel	NR_033496	Lrp8	sense overlapping	14946
chr7	144445606	144448566	MACS_peak_178687	527.38	2960	chr7:144436898-144454786-	527.38	9.59	4.78	NA	novel	NM_007803	Cttn	sense overlapping	17889
chr18	36165767	36167606	MACS_peak_88573	523.14	1839	chr18:36165423-36184590-	523.14	17.01	6.33	NA	novel	ENSMUST00000115705	Nrg2	intronic	19168
chr2	135364767	135364987	MACS_peak_111220	500.09	220	chr2:135344158-135399366+	500.09	7.89	4.8	NA	novel	NM_019677	Plcb1	exonic	1498
chr6	87288149	87288380	MACS_peak_145435	471.77	231	chr6:87240950-87288839+	471.77	11.05	9.87	NA	novel	ENSMUST00000122664	n-R5s164	sense overlapping	47890
chr9	112211275	112212009	MACS_peak_196248	468.74	734	chr9:112176095-112228935-	468.74	15.82	6.91	NA	novel	NM_028755	Arpp21	sense overlapping	52841
chr4	124715852	124716105	MACS_peak_132783	419.86	253	chr4:124715853-124718360+	419.86	7.71	7.43	NA	novel	NM_029157	Sf3a3	sense overlapping	2508
chr4	126123715	126123835	MACS_peak_135527	403.7	120	chr4:126123716-126125818+	403.7	10.89	5.25	4_125803062_125800960_-2102|21.75|8|14	PMID:25714049	NM_028800	Stk40	exonic	350
chr3	86084251	86085357	MACS_peak_120958	386.49	1106	chr3:86075148-86085357+	386.49	5.74	5.27	3_85889279_85879070_-10209|21.05|2|2	PMID:25714049	NM_001082414	Sh3d19	sense overlapping	10210
chr13	45566572	45568580	MACS_peak_49159	368.06	2008	chr13:45566573-45568580-	368.06	4.52	5.46	NA	novel	NM_009124	Atxn1	exonic	2008
chrX	143693286	143693488	MACS_peak_201939	349.46	202	chrX:143693287-143716148+	349.46	6.87	8.26	X_140150691_140127830_-22861|21.96|8|12	PMID:25714049	NM_008778	Pak3	exonic	495
chr12	16928933	16929010	MACS_peak_37337	337.1	77	chr12:16926939-16929034+	337.1	4.04	8.55	12_16935840_16933745_-2095|20.18|3|3	PMID:25714049	NM_009072	Rock2	exonic	183
chr14	23859778	23860319	MACS_peak_54931	333.17	541	chr14:23803140-23887867-	333.17	18.72	8.64	NA	novel	NM_001253374	Kcnma1	intronic	84728
chr1	127927974	127929000	MACS_peak_8283	315.44	1026	chr1:127924191-127931078+	315.44	7.9	8.9	NA	novel	NM_178690	Rab3gap1	sense overlapping	6888
chr5	115724540	115724756	MACS_peak_146742	303.12	216	chr5:115724541-115724756-	303.12	7.55	9.14	5_116174765_116174550_-215|16.90|6|8	PMID:25714049	NM_001080808	Ccdc64	exonic	216
chr13	111488409	111489717	MACS_peak_53783	278.39	1308	chr13:111488410-111489717-	278.39	25.26	6.38	NA	novel	ENSMUST00000047627	Gpbp1	intronic	1308
chr19	4324062	4325240	MACS_peak_93185	276.44	1178	chr19:4319180-4362914-	276.44	4.8	10	NA	novel	NM_001001984	Kdm2a	sense overlapping	43735
chr18	63926578	63926728	MACS_peak_83548	257.23	150	chr18:63924812-63935948+	257.23	13.07	12.18	NA	novel	NM_001014981	Wdr7	exonic	451
chr1	131511228	131511903	MACS_peak_8538	239.15	675	chr1:131436750-131524999-	239.15	10.67	10.87	NA	novel	NM_001081011	Srgap2	sense overlapping	88250
chr18	25060325	25060374	MACS_peak_88973	238.74	49	chr18:25028065-25060376+	238.74	6.56	6.87	18_25218877_25186566_-32311|15.13|4|5	PMID:25714049	NM_175276	Fhod3	exonic	291
chr14	7884358	7884747	MACS_peak_54451	233.84	389	chr14:7883895-7884747+	233.84	6.94	7.04	NA	novel	NM_134080	Flnb	sense overlapping	853
chr2	118915887	118917309	MACS_peak_109345	218.28	1422	chr2:118915888-118921696+	218.28	8.96	7.35	2_118747432_118741624_-5808|19.77|9|19	PMID:25714049	NM_001045523	Bahd1	exonic	2143
chr2	18130644	18131427	MACS_peak_101380	210	783	chr2:18092769-18146872+	210	10.33	7.5	NA	novel	NM_010804	Mllt10	sense overlapping	54104
chr7	134763848	134763973	MACS_peak_177720	199.33	125	chr7:134756877-134789285+	199.33	8.17	7.83	7_141980968_141948560_-32408|17.11|3|3	PMID:25714049	NM_001033420	Dock1	exonic	1215
chr18	42257069	42257194	MACS_peak_90613	193.94	125	chr18:42241903-42257194-	193.94	7.2	7.91	NA	novel	NM_134137	Lars	exonic	1065
chr11	84094244	84094683	MACS_peak_28976	189.13	439	chr11:84079611-84096967-	189.13	10.02	14.46	NA	novel	NM_172562	Tada2a	sense overlapping	17357
chr7	132557717	132557905	MACS_peak_177449	185.93	188	chr7:132557510-132557905-	185.93	5.68	8.07	NA	novel	ENSMUST00000124096	Fgfr2	intronic	396
chr19	4286200	4286942	MACS_peak_94739	177.36	742	chr19:4286201-4286942-	177.36	5.47	8.23	NA	novel	ENSMUST00000171123	Adrbk1	intronic	742
chr5	45795292	45795358	MACS_peak_141564	175.04	66	chr5:45735731-45795358-	175.04	4.98	13.55	5_46186597_46126970_-59627|16.48|6|7	PMID:25714049	NM_172153	Lcorl	exonic	622
chr4	48643173	48643750	MACS_peak_127334	172.29	577	chr4:48636840-48672204+	172.29	9.68	13.73	4_48685076_48649712_-35364|21.80|10|35	PMID:25714049	NM_021436	Tmeff1	sense overlapping	35365
chr2	35149445	35149594	MACS_peak_102020	171.64	149	chr2:35148491-35155459+	171.64	8.75	13.73	NA	novel	NM_012018	Cntrl	exonic	1127
chr17	28416263	28416425	MACS_peak_74402	170.21	162	chr17:28416264-28416425-	170.21	16.18	15.3	NA	novel	ENSMUST00000079413	Fkbp5	intronic	162
chr6	31147538	31147784	MACS_peak_153382	170.12	246	chr6:31139729-31197851-	170.12	8.7	13.78	mmu_circ_0001453	circBase	NR_110469	Lincpint	sense overlapping	58123
chr5	134183788	134184740	MACS_peak_137563	157.62	952	chr5:134176400-134256008-	157.62	12.17	15.96	NA	novel	NM_010365	Gtf2i	sense overlapping	79609
chr2	177182070	177183022	MACS_peak_104824	146.15	952	chr2:177159100-177238501-	146.15	6.84	16.39	NA	novel	uc029ujb.1	AK078446	sense overlapping	79402
chr14	56673890	56674739	MACS_peak_58594	132.32	849	chr14:56672405-56678818+	132.32	3.41	9.8	14_57297655_57291242_-6413|17.42|9|15	PMID:25714049	NM_023773	Mphosph8	exonic	1357
chr6	27757511	27757804	MACS_peak_140960	127.24	293	chr6:27737859-27762497-	127.24	8.59	18	NA	novel	NM_008174	Grm8	sense overlapping	24639
chr7	66125241	66125737	MACS_peak_171191	125.51	496	chr7:66125242-66125737+	125.51	4.26	10.09	mmu_circ_0001580	circBase	NM_001081163	Chsy1	exonic	496
chr5	110267086	110267265	MACS_peak_145699	120.42	179	chr5:110265512-110267265-	120.42	5.42	17.24	5_110696284_110694531_-1753|12.30|20|88	PMID:25714049	NM_028273	Pgam5	exonic	525
chr4	103066259	103066486	MACS_peak_130608	113.39	227	chr4:103048210-103072843-	113.39	7.21	18.02	4_102745448_102720815_-24633|14.88|13|18	PMID:25714049	NM_146254	Wdr78	exonic	1424
chr7	35310439	35310574	MACS_peak_168596	104.55	135	chr7:35305930-35310574-	104.55	9.77	11.1	7_36095593_36090949_-4644|18.97|5|5	PMID:25714049	NM_026181	Gpatch1	exonic	539
chr1	133624299	133624995	MACS_peak_8855	94.01	696	chr1:133621453-133655398-	94.01	4.92	12.01	NA	novel	NM_144530	Zc3h11a	sense overlapping	33946
chr7	16359035	16359141	MACS_peak_163632	82.87	106	chr7:16336694-16359141-	82.87	3.92	21.63	NA	novel	NM_019748	Sae1	exonic	251
chr14	60796171	60796233	MACS_peak_57943	75.25	62	chr14:60787295-60827452+	75.25	3.35	22.84	NA	novel	NM_027436	Mipep	exonic	1071
chr7	127758333	127758450	MACS_peak_177019	56.91	117	chr7:127758334-127758505+	56.91	4.51	16.35	NA	novel	ENSMUST00000033081	Fbxl19	intronic	172
chr1	93430954	93431170	MACS_peak_6655	56.56	216	chr1:93412363-93442250-	56.56	3.52	16.44	NA	novel	NM_133808	Hdlbp	exonic	3390
chr17	35156322	35157978	MACS_peak_82988	3220.51	1656	chr17:35156323-35157978-	3220.51	9.42	0	NA	novel	NM_020027	Prrc2a	sense overlapping	1656
chr8	22938420	22938717	MACS_peak_180923	3217.04	297	chr8:22938421-22938717+	3217.04	21.43	0	NA	novel	NM_001081149	Kat6a	sense overlapping	297
chr15	77763263	77763820	MACS_peak_66650	3141.17	557	chr15:77763264-77763820-	3141.17	13.55	8.33	NA	novel	NM_022410	Myh9	sense overlapping	557
chr1	24613305	24614294	MACS_peak_1282	3100	989	chr1:24613306-24614294-	3100	5.75	5.87	NA	novel	uc007ams.1	Atpase6	sense overlapping	989
chr1	30805553	30805850	MACS_peak_1512	3100	297	chr1:30805554-30805850-	3100	40.3	5.87	NA	novel	NM_001081080	Phf3	sense overlapping	297
chr1	136276537	136276758	MACS_peak_9269	3100	221	chr1:136273750-136282881-	3100	15.54	5.87	1_138179458_138170327_-9131|16.10|7|11	PMID:25714049	NM_001081360	Camsap2	exonic	2811
chr10	63017028	63019527	MACS_peak_18174	3100	2499	chr10:63014452-63019527-	3100	18.05	5.87	NA	novel	NM_001079824	Hnrnph3	sense overlapping	5076
chr11	58041477	58041652	MACS_peak_28372	3100	175	chr11:58040391-58044050+	3100	17.09	5.87	11_57857552_57853893_-3659|21.21|6|10	PMID:25714049	NM_028451	Larp1	exonic	947
chr13	55475947	55478060	MACS_peak_50173	3100	2113	chr13:55475001-55481660-	3100	19.74	5.87	NA	novel	NM_019813	Dbn1	sense overlapping	6660
chr13	99433768	99435547	MACS_peak_52858	3100	1779	chr13:99433769-99435547-	3100	9.15	5.87	NA	novel	NM_008634	Map1b	sense overlapping	1779
chr14	54642756	54643247	MACS_peak_58392	3100	491	chr14:54642757-54644171-	3100	17.49	5.87	NA	novel	NM_019567	Acin1	sense overlapping	1415
chr15	25364138	25364759	MACS_peak_63792	3100	621	chr15:25364139-25364759-	3100	23.79	5.87	NA	novel	NM_027395	Basp1	sense overlapping	621
chr16	20651761	20652921	MACS_peak_73482	3100	1160	chr16:20651762-20662659+	3100	45.2	5.87	NA	novel	NM_134101	Psmd2	sense overlapping	10898
chr17	33652272	33652326	MACS_peak_82751	3100	54	chr17:33649595-33665645-	3100	56.03	5.87	NA	novel	NM_029804	Hnrnpm	exonic	1347
chr17	39843296	39845357	MACS_peak_83185	3100	2061	chr17:39843297-39845357+	3100	5.25	5.87	NA	novel	NR_046233	Rn45s	sense overlapping	2061
chr3	30818375	30820228	MACS_peak_117839	3100	1853	chr3:30809822-30820228+	3100	31.84	5.87	NA	novel	NM_027016	Sec62	sense overlapping	10407
chr3	87975836	87977936	MACS_peak_121224	3100	2100	chr3:87975837-87977936+	3100	9.02	5.87	NA	novel	NM_016701	Nes	sense overlapping	2100
chr4	127026204	127027289	MACS_peak_135735	3100	1085	chr4:127026205-127027289+	3100	18.82	5.87	NA	novel	NM_023603	Sfpq	sense overlapping	1085
chr4	131900486	131901115	MACS_peak_136579	3100	629	chr4:131900487-131901115+	3100	14.01	5.87	NA	novel	NM_020587	Srsf4	sense overlapping	629
chr5	125386161	125387985	MACS_peak_151330	3100	1824	chr5:125386162-125387985-	3100	4.49	5.87	NA	novel	NM_019639	Ubc	sense overlapping	1824
chr6	30805349	30805695	MACS_peak_156409	3100	346	chr6:30805350-30805695+	3100	14.79	5.87	NA	novel	uc009bfw.1	Mit1/Lb9	sense overlapping	346
chr6	124746487	124746834	MACS_peak_164220	3100	347	chr6:124746488-124746834-	3100	14.38	5.87	NA	novel	NM_007881	Atn1	sense overlapping	347
chr7	28338351	28338744	MACS_peak_167913	3100	393	chr7:28338352-28338744-	3100	28.65	5.87	NA	novel	NM_013676	Supt5	sense overlapping	393
chr7	73417526	73417821	MACS_peak_171567	3100	295	chr7:73417527-73417821+	3100	11.22	5.87	NA	novel	NM_177740	Rgma	sense overlapping	295
chr10	80300288	80300439	MACS_peak_19858	3100	151	chr10:80300289-80300439+	3100	54.12	5.8	NA	novel	ENSMUST00000105359	Apc2	intronic	151
chr15	25780973	25781864	MACS_peak_62904	3100	891	chr15:25778081-25793246+	3100	14.79	5.8	NA	novel	NM_019472	Myo10	exonic	1739
chr3	157540434	157542063	MACS_peak_124159	3012.93	1629	chr3:157536334-157546845+	3012.93	18	5.75	NA	novel	NM_017381	Zranb2	sense overlapping	10512
chr6	118404579	118405340	MACS_peak_160325	2716.08	761	chr6:118404256-118413919-	2716.08	21.56	5.44	NA	novel	NM_194339	Bms1	exonic	1651
chr5	23525305	23525922	MACS_peak_139082	2680.37	617	chr5:23434234-23528062-	2680.37	10.43	5.51	NA	novel	NM_009274	Srpk2	sense overlapping	93829
chr7	12774112	12775658	MACS_peak_163413	2624.54	1546	chr7:12770804-12775658-	2624.54	20.64	5.49	7_13361007_13356153_-4854|23.20|13|51	PMID:25714049	NM_001017955	Zscan18	exonic	1972
chr7	45048846	45049769	MACS_peak_169221	2570.9	923	chr7:45048847-45049769-	2570.9	9.21	5.31	NA	novel	NM_175022	Prr12	sense overlapping	923
chr2	121305037	121305667	MACS_peak_109797	2474.64	630	chr2:121305038-121305667+	2474.64	18.51	5.24	NA	novel	ENSMUST00000133283	Map1a	intronic	630
chr1	87403666	87403846	MACS_peak_5881	2428.72	180	chr1:87364104-87403846+	2428.72	28.85	5.13	1_89300421_89260679_-39742|21.11|6|7	PMID:25714049	NM_146112	Gigyf2	exonic	674
chr3	34648968	34652145	MACS_peak_106983	2328.31	3177	chr3:34638358-34653284-	2328.31	6.29	10.57	NA	novel	NM_011443	Sox2	antisense	14927
chr2	85061887	85064016	MACS_peak_107167	2234.72	2129	chr2:85058126-85072168+	2234.72	9.48	4.74	NA	novel	NM_001081260	Tnks1bp1	exonic	4380
chr2	155406631	155408167	MACS_peak_112977	2122.77	1536	chr2:155406632-155408167-	2122.77	15.8	4.71	NA	novel	NM_001242558	Ncoa6	intronic	1536
chr10	29146563	29147753	MACS_peak_15736	2117.31	1190	chr10:29146564-29150402+	2117.31	8.2	5.66	10_28870208_28866370_-3838|13.74|8|10	PMID:25714049	NM_026138	Soga3	exonic	1574
chr19	23892734	23894020	MACS_peak_96468	2114.29	1286	chr19:23892735-23894020+	2114.29	8.89	4.7	19_23968510_23967225_-1285|20.06|6|8	PMID:25714049	NM_177034	Apba1	exonic	1286
chr19	26751823	26752240	MACS_peak_96663	2054.16	417	chr19:26751824-26803141+	2054.16	8.71	4.79	NA	novel	NM_011416	Smarca2	sense overlapping	51318
chr18	47248847	47249072	MACS_peak_91143	1936.06	225	chr18:47248848-47249072-	1936.06	8.78	4.69	NA	novel	ENSMUST00000123228	Sema6a	intronic	225
chr4	129514774	129514935	MACS_peak_122967	1849.12	161	chr4:129514775-129514935+	1849.12	4.64	9.57	NA	novel	NM_010807	Marcksl1	sense overlapping	161
chr5	142771304	142772303	MACS_peak_153713	1818.8	999	chr5:142771305-142776742-	1818.8	8.2	4.79	5_143538484_143533047_-5437|18.18|2|2	PMID:25714049	NM_178242	Tnrc18	exonic	2067
chr7	30522833	30522992	MACS_peak_168310	1804.01	159	chr7:30522834-30522992+	1804.01	6.65	4.75	NA	novel	NM_178252	Arhgap33	antisense	159
chr11	94333987	94334527	MACS_peak_32494	1759.39	540	chr11:94333988-94334527+	1759.39	17.24	5.62	NA	novel	NM_027799	Ankrd40	sense overlapping	540
chr2	32632515	32634096	MACS_peak_103274	1759.37	1581	chr2:32628369-32634096+	1759.37	23.43	4.7	NA	novel	NM_021515	Ak1	sense overlapping	5728
chr17	13887981	13888977	MACS_peak_79409	1721.17	996	chr17:13887982-13896222+	1721.17	10.68	5.58	NA	novel	NM_010806	Mllt4	exonic	1131
chr11	6601464	6601637	MACS_peak_24782	1626.02	173	chr11:6601465-6601637-	1626.02	10.49	4.61	NA	novel	NM_001081652	Nacad	sense overlapping	173
chr7	64695023	64696017	MACS_peak_171006	1596.92	994	chr7:64695024-64696017+	1596.92	10.59	4.68	7_71840903_71839910_-993|20.05|11|41	PMID:25714049	NM_007461	Apba2	exonic	994
chr6	93679236	93679410	MACS_peak_146163	1579.49	174	chr6:93679237-93679410-	1579.49	12.77	9.15	NA	novel	ENSMUST00000055224	Magi1	intronic	174
chr12	76327565	76329957	MACS_peak_41143	1530.35	2392	chr12:76327566-76330488+	1530.35	11.53	5.54	12_77431475_77428553_-2922|21.49|5|7	PMID:25714049	NM_001101471	Akap5	sense overlapping	2923
chr11	97833594	97834803	MACS_peak_32962	1497.22	1209	chr11:97833595-97837655+	1497.22	12.75	5.5	NA	novel	NM_010688	Lasp1	sense overlapping	4061
chr11	95748999	95749607	MACS_peak_30014	1470.8	608	chr11:95749000-95764327+	1470.8	7.75	8.7	11_95625641_95610314_-15327|19.43|4|4	PMID:25714049	ENSMUST00000148945	Zfp652	exonic	1806
chr5	143264292	143264681	MACS_peak_153810	1465.83	389	chr5:143264051-143265133-	1465.83	12.73	4.75	NA	novel	NM_017467	Zfp316	exonic	609
chr7	109024524	109025923	MACS_peak_174723	1419.58	1399	chr7:109024525-109029655+	1419.58	17.32	4.79	NA	novel	NM_021885	Tub	sense overlapping	5131
chr7	30306997	30307205	MACS_peak_152184	1403.47	208	chr7:30306998-30307205+	1403.47	7.18	8.41	NA	novel	NM_001081114	Clip3	sense overlapping	208
chr13	21721666	21722523	MACS_peak_46852	1376.74	857	chr13:21721667-21753674-	1376.74	13.58	5.53	NA	novel	NM_178183	Hist1h2ak	sense overlapping	32008
chr3	10088670	10088830	MACS_peak_114811	1365.6	160	chr3:10088671-10088830-	1365.6	10.97	5.49	NA	novel	NR_045710	Gm9833	antisense	160
chr1	42696325	42698221	MACS_peak_2596	1295.49	1896	chr1:42696326-42698221+	1295.49	8.73	4.69	NA	novel	ENSMUST00000176807	Gm20646	intronic	1896
chr7	44863698	44864445	MACS_peak_169164	1287.97	747	chr7:44863699-44864445-	1287.97	11.81	4.73	NA	novel	NM_133949	Ptov1	sense overlapping	747
chr5	34465290	34466678	MACS_peak_140640	1244.53	1388	chr5:34420001-34485848+	1244.53	14.7	5.2	NA	novel	NM_001243123	Fam193a	sense overlapping	65848
chr2	160682650	160682774	MACS_peak_111862	1239.06	124	chr2:160670100-160690352+	1239.06	6.76	5.18	2_160516088_160495836_-20252|15.91|10|17	PMID:25714049	NM_009408	Top1	exonic	455
chr10	80124801	80127300	MACS_peak_19815	1233.5	2499	chr10:80124802-80130436+	1233.5	17.52	5.22	NA	novel	NM_011492	Stk11	sense overlapping	5635
chr2	25937945	25940313	MACS_peak_102041	1209.78	2368	chr2:25937946-25941469-	1209.78	8.44	4.81	2_25796989_25793466_-3523|15.10|14|17	PMID:25714049	NM_001276359	Camsap1	exonic	2545
chr1	72874629	72874869	MACS_peak_4772	1196.81	240	chr1:72874630-72874869-	1196.81	9.21	4.74	NA	novel	NM_010518	Igfbp5	sense overlapping	240
chr15	98949810	98951226	MACS_peak_70466	1194.16	1416	chr15:98932530-98951226-	1194.16	5.16	4.73	NA	novel	NM_011653	Tuba1a	sense overlapping	18697
chr17	32336284	32336738	MACS_peak_81363	1163.7	454	chr17:32332479-32345398-	1163.7	10.59	5.53	mmu_circ_0006696	circBase	NM_017476	Akap8l	exonic	1523
chr3	10015074	10016111	MACS_peak_116719	1151.64	1037	chr3:10015075-10016111+	1151.64	7.67	4.7	NA	novel	NM_010634	Fabp5	sense overlapping	1037
chr3	105717619	105717793	MACS_peak_120911	1129.4	174	chr3:105717620-105717793+	1129.4	17.61	5.5	NA	novel	NM_175398	Fam212b	sense overlapping	174
chr4	143162055	143162182	MACS_peak_124984	1111.86	127	chr4:143162056-143194734-	1111.86	19.37	8.3	4_142784637_142751959_-32678|21.42|9|14	PMID:25714049	NM_001081355	Prdm2	exonic	573
chr10	120977998	120978777	MACS_peak_23250	1086.12	779	chr10:120977999-120978777-	1086.12	11.18	4.66	NA	novel	NM_001081193	Lemd3	sense overlapping	779
chr19	12491835	12492550	MACS_peak_95846	1073.03	715	chr19:12478126-12492550-	1073.03	9.77	4.67	19_12567040_12552616_-14424|17.96|2|2	PMID:25714049	NM_172442	Dtx4	exonic	1316
chr3	107672090	107672335	MACS_peak_121050	1032.52	245	chr3:107672091-107675053-	1032.52	8.54	5.44	NA	novel	NM_145542	Ahcyl1	sense overlapping	2963
chr15	57821031	57823751	MACS_peak_65037	1021.45	2720	chr15:57762646-57823751+	1021.45	13.45	5.44	NA	novel	NM_199449	Zhx2	exonic	2794
chr16	36912819	36912978	MACS_peak_73845	938.17	159	chr16:36912820-36912978+	938.17	9.32	5.32	NA	novel	uc012afk.1	Golgb1	intronic	159
chr13	9689644	9689923	MACS_peak_46088	911.82	279	chr13:9689645-9690508-	911.82	5.88	5.37	NA	novel	NM_144516	Zmynd11	sense overlapping	864
chr17	25830768	25831197	MACS_peak_80258	902.5	429	chr17:25830769-25831197-	902.5	10.78	5.45	NA	novel	NM_019719	Stub1	sense overlapping	429
chr18	60712722	60713632	MACS_peak_91910	894	910	chr18:60712723-60713632-	894	16.76	4.63	18_60873286_60872377_-909|17.56|12|25	PMID:25714049	uc008fat.1	Ndst1	exonic	910
chr6	18433819	18435446	MACS_peak_155603	887.55	1627	chr6:18397333-18435446-	887.55	9.04	4.66	NA	novel	NM_080285	Cttnbp2	exonic	3091
chr9	44847403	44850054	MACS_peak_193828	885.64	2651	chr9:44840971-44850054-	885.64	7.42	4.66	NA	novel	NM_001081049	Kmt2a	exonic	3833
chr17	6121315	6123212	MACS_peak_78480	845.15	1897	chr17:6118296-6139156+	845.15	17.82	5.48	17_6139156_6118296_-20860|16.33|7|10	PMID:25714049	ENSMUST00000142030	Tulp4	intronic	20861
chr2	131511983	131514424	MACS_peak_109106	841.4	2441	chr2:131511984-131555847+	841.4	12.68	5.54	NA	novel	NM_145533	Smox	sense overlapping	43864
chr11	35853359	35853477	MACS_peak_26561	803.1	118	chr11:35852194-35860187-	803.1	12.62	4.62	NA	novel	NM_170779	Wwc1	exonic	375
chr5	53635961	53636057	MACS_peak_142003	792.76	96	chr5:53627383-53646044+	792.76	35.64	5.48	NA	novel	NM_009035	Rbpj	exonic	476
chr15	76737085	76737329	MACS_peak_67499	784.66	244	chr15:76737086-76737329-	784.66	12.82	4.68	NA	novel	NM_198420	Arhgap39	sense overlapping	244
chr7	127019463	127019951	MACS_peak_176904	760.35	488	chr7:127019464-127019951-	760.35	12.71	4.7	NA	novel	ENSMUST00000161728	Prrt2	intronic	488
chr8	87859283	87859484	MACS_peak_185819	745.76	201	chr8:87773567-87859484-	745.76	13.85	4.65	NA	novel	NM_033327	Zfp423	exonic	3501
chr5	76997422	76997777	MACS_peak_143530	743.96	355	chr5:76997423-77007407+	743.96	9.61	5.85	NA	novel	NM_025691	Srp72	sense overlapping	9985
chr1	182446273	182446736	MACS_peak_12823	727.99	463	chr1:182428894-182449179+	727.99	21.48	4.67	NA	novel	NM_173378	Trp53bp2	exonic	2697
chr8	84676340	84677252	MACS_peak_167602	726.22	912	chr8:84676085-84677252-	726.22	6.76	9.06	NA	novel	NM_025788	Nacc1	exonic	1086
chr3	30936284	30937156	MACS_peak_117853	716.09	872	chr3:30914095-30942652-	716.09	9.21	4.69	3_30841574_30813017_-28557|18.77|2|4	PMID:25714049	NM_153421	Phc3	exonic	2161
chr13	101757325	101758039	MACS_peak_53035	691.58	714	chr13:101757326-101758039+	691.58	12.2	4.74	NA	novel	NM_001077495	Pik3r1	antisense	714
chr6	39522655	39523759	MACS_peak_157626	690.46	1104	chr6:39522656-39523759-	690.46	10.25	4.76	6_39473758_39472655_-1103|19.93|16|29	PMID:25714049	NM_172477	Dennd2a	exonic	1104
chr6	136559763	136561439	MACS_peak_165114	675.82	1676	chr6:136559764-136571538+	675.82	6.74	4.68	6_136520059_136508285_-11774|18.04|5|7	PMID:25714049	NM_019426	Atf7ip	exonic	2104
chr17	56393717	56394106	MACS_peak_84467	665.59	389	chr17:56352976-56394106+	665.59	12.66	4.66	NA	novel	NM_172132	Kdm4b	exonic	1635
chr2	169883525	169886459	MACS_peak_115066	659.46	2934	chr2:169883526-169886459-	659.46	11.17	4.65	NA	novel	ENSMUST00000180945	Gm26883	sense overlapping	2934
chr2	84710801	84711472	MACS_peak_107125	640.75	671	chr2:84710318-84711472-	640.75	13.91	4.67	2_84551629_84550475_-1154|17.16|1|2	PMID:25714049	NM_144887	Zdhhc5	exonic	1155
chr7	63938092	63938571	MACS_peak_170915	634.04	479	chr7:63938093-63938571-	634.04	9.55	4.63	NA	novel	NM_021366	Klf13	sense overlapping	479
chr7	16960392	16961108	MACS_peak_166923	628.57	716	chr7:16960393-16961108+	628.57	9.98	4.63	NA	novel	NM_001007569	Pnmal1	sense overlapping	716
chr11	71759577	71760266	MACS_peak_29761	563.04	689	chr11:71759578-71771974+	563.04	8.87	6.3	11_71585476_71573080_-12396|18.19|11|18	PMID:25714049	NM_177618	Wscd1	exonic	1111
chr15	89547428	89549882	MACS_peak_69553	560.12	2454	chr15:89543105-89549882+	560.12	5.44	4.8	NA	novel	NM_021423	Shank3	sense overlapping	6778
chr10	103214634	103216112	MACS_peak_20277	542.88	1478	chr10:103170421-103221459-	542.88	14.68	9.35	NA	novel	NM_001163559	Lrriq1	exonic	3364
chr17	80406690	80406958	MACS_peak_86272	517.75	268	chr17:80399741-80408740-	517.75	8.24	4.75	NA	novel	NM_009231	Sos1	exonic	677
chr8	8620313	8621439	MACS_peak_179015	510.03	1126	chr8:8620314-8639489-	510.03	6.29	4.7	mmu_circ_0015032	circBase	NM_010111	Efnb2	sense overlapping	19176
chr6	128355093	128356028	MACS_peak_161430	502.46	935	chr6:128333833-128359354+	502.46	18.45	6.59	NA	novel	ENSMUST00000180586	Gm26770	sense overlapping	25522
chr15	84804759	84805110	MACS_peak_67824	499.84	351	chr15:84803454-84808158-	499.84	11.34	6.64	NA	novel	NR_030731	Phf21b	exonic	576
chr5	135216589	135218294	MACS_peak_149595	453.71	1705	chr5:135198171-135222096+	453.71	10.1	7.19	NA	novel	NM_011714	Baz1b	exonic	2511
chr9	45871870	45871967	MACS_peak_194098	447.15	97	chr9:45866566-45900256-	447.15	7.49	5.01	9_45708339_45674649_-33690|17.06|3|4	PMID:25714049	NM_178709	Rnf214	exonic	1834
chr4	149222226	149223408	MACS_peak_139094	442.4	1182	chr4:149222227-149223408+	442.4	5.28	5	NA	novel	NM_207682	Kif1b	antisense	1182
chr10	42196465	42197901	MACS_peak_16580	437.59	1436	chr10:42196466-42197901-	437.59	7.67	5.04	10_41917707_41916272_-1435|21.54|9|13	PMID:25714049	NM_019740	Foxo3	exonic	1436
chr10	18523405	18525689	MACS_peak_15033	430.72	2284	chr10:18514095-18525689+	430.72	7.11	5.1	NA	novel	NM_173390	Nhsl1	sense overlapping	11595
chr9	14561878	14562402	MACS_peak_186544	419.84	524	chr9:14547690-14575439-	419.84	8.2	7.43	9_14379883_14352134_-27749|17.77|5|6	PMID:25714049	NM_001081395	Amotl1	sense overlapping	27750
chr2	131936922	131937230	MACS_peak_110943	413.75	308	chr2:131936923-131937230+	413.75	9.05	5.2	NA	novel	ENSMUST00000124100	PRND	intronic	308
chr2	29902180	29902341	MACS_peak_100956	411.84	161	chr2:29892186-29904107+	411.84	7.16	7.57	mmu_circ_0009798	circBase	NM_013615	Odf2	exonic	754
chr13	54525445	54526344	MACS_peak_50014	406.73	899	chr13:54523970-54529223+	406.73	7.34	5.28	13_54630584_54625331_-5253|16.50|5|7	PMID:25714049	NM_176987	Simc1	exonic	3006
chr17	65851932	65853008	MACS_peak_83677	398.33	1076	chr17:65849915-65859134-	398.33	10.64	7.7	NA	novel	NM_009067	Ralbp1	sense overlapping	9220
chr11	88049976	88051469	MACS_peak_32269	386.36	1493	chr11:88049977-88053039+	386.36	5.2	5.27	11_87866541_87863479_-3062|20.39|8|9	PMID:25714049	NM_173374	Srsf1	sense overlapping	3063
chr7	19286537	19287510	MACS_peak_167081	383.73	973	chr7:19286538-19287510+	383.73	5.6	5.24	NA	novel	NM_013648	Rtn2	sense overlapping	973
chr3	107758294	107758338	MACS_peak_111411	379.77	44	chr3:107758184-107758338+	379.77	10.25	10.28	NA	novel	NM_007778	Csf1	antisense	155
chr6	128365657	128366396	MACS_peak_161435	374.74	739	chr6:128365658-128400301+	374.74	6.97	8	NA	novel	NM_008021	Foxm1	sense overlapping	34644
chr7	16495621	16499505	MACS_peak_166829	370.29	3884	chr7:16495622-16561975-	370.29	9.42	5.42	NA	novel	NM_172739	Arhgap35	sense overlapping	66354
chr12	108860923	108861091	MACS_peak_45423	362.91	168	chr12:108860924-108861091-	362.91	8.45	5.45	NA	novel	ENSMUST00000161154	Wars	intronic	168
chr11	69601251	69601822	MACS_peak_27239	355.64	571	chr11:69601252-69602454-	355.64	5	10.68	NA	novel	NM_013415	Atp1b2	sense overlapping	1203
chr2	130542306	130542456	MACS_peak_100344	354.42	150	chr2:130537552-130545083+	354.42	5.97	10.67	NA	novel	NM_008980	Ptpra	exonic	977
chr8	119941109	119942138	MACS_peak_188648	342.64	1029	chr8:119931849-119942138+	342.64	5.93	5.67	8_122466038_122455749_-10289|17.21|13|27	PMID:25714049	NM_009462	Usp10	exonic	1156
chr5	25313979	25315875	MACS_peak_139408	339.12	1896	chr5:25298870-25329575-	339.12	7.75	8.46	mmu_circ_0012469	circBase	NM_001081383	Kmt2c	exonic	7091
chr11	102802670	102802916	MACS_peak_33954	311.39	246	chr11:102800612-102802916-	311.39	14.7	6.09	11_102664230_102661926_-2304|19.06|8|20	PMID:25714049	NM_008122	Gjc1	sense overlapping	2305
chr5	73050301	73050505	MACS_peak_143066	305.17	204	chr5:73023888-73050505-	305.17	18.19	9.11	NA	novel	NM_028194	Fryl	exonic	1254
chr7	4706461	4707221	MACS_peak_163126	305.06	760	chr7:4706462-4707221+	305.06	7.78	9.1	NA	novel	NM_001003920	Brsk1	sense overlapping	760
chr5	136485532	136485851	MACS_peak_152853	304.14	319	chr5:136485533-136485851-	304.14	6.3	6.04	NA	novel	ENSMUST00000175918	Cux1	intronic	319
chr6	48597119	48597359	MACS_peak_158205	300.18	240	chr6:48597120-48597359+	300.18	6.79	6.06	NA	novel	NM_175099	Repin1	sense overlapping	240
chr11	107082321	107082851	MACS_peak_34175	300.16	530	chr11:107047000-107085373-	300.16	8.46	9.21	NA	novel	NM_176850	Bptf	sense overlapping	38374
chr6	48028937	48029374	MACS_peak_155031	298.52	437	chr6:48017639-48029374-	298.52	9.37	9.28	NA	novel	NM_001081382	Zfp777	sense overlapping	11736
chr5	144173608	144176477	MACS_peak_153970	296.95	2869	chr5:144143526-144176477+	296.95	6.8	6.12	5_144937346_144904395_-32951|18.16|4|6	PMID:25714049	NM_001081109	Lmtk2	exonic	3641
chr10	128393433	128393585	MACS_peak_24047	292.8	152	chr10:128393434-128393585+	292.8	5.31	6.13	NA	novel	ENSMUST00000166577	Ankrd52	intronic	152
chr11	81151560	81154032	MACS_peak_28691	287.61	2472	chr11:81146081-81159306-	287.61	8.02	11.54	NA	novel	ENSMUST00000066197	Asic2	intronic	13226
chr7	99942765	99943326	MACS_peak_170541	275.09	561	chr7:99924296-99955540-	275.09	7.11	9.99	7_107104050_107072806_-31244|17.58|19|72	PMID:25714049	NM_175388	Rnf169	sense overlapping	31245
chr16	50224287	50225293	MACS_peak_76389	266.6	1006	chr16:50209085-50225293-	266.6	7.46	6.48	NA	novel	NM_027444	Bbx	exonic	1351
chr13	54551998	54553304	MACS_peak_50023	265.64	1306	chr13:54551999-54553304-	265.64	4.88	6.55	NA	novel	NM_133797	4833439L19Rik	sense overlapping	1306
chr5	66451467	66452283	MACS_peak_145388	262.28	816	chr5:66451468-66452283-	262.28	3.62	6.6	mmu_circ_0012736	circBase	NM_009686	Apbb2	exonic	816
chr6	47890065	47890192	MACS_peak_158102	259.08	127	chr6:47890066-47899007+	259.08	7.76	6.63	6_47849006_47840065_-8941|15.86|4|4	PMID:25714049	NM_146175	Zfp282	exonic	595
chr7	65312554	65313424	MACS_peak_171084	258.84	870	chr7:65311004-65342719-	258.84	4.96	6.64	NA	novel	NM_009386	Tjp1	exonic	3990
chr3	55116983	55117795	MACS_peak_119246	258.75	812	chr3:55116984-55117795+	258.75	9.42	6.64	NA	novel	NM_144895	Spg20	exonic	812
chr15	83791953	83792258	MACS_peak_68766	253.15	305	chr15:83791954-83800184+	253.15	7.39	6.73	mmu_circ_0000630	circBase	NM_172610	Mpped1	exonic	487
chr11	106566964	106568627	MACS_peak_34098	245.47	1663	chr11:106544172-106568627-	245.47	6.82	10.75	11_106429941_106405486_-24455|19.62|7|9	PMID:25714049	NM_198292	Tex2	exonic	2452
chr2	160754284	160754485	MACS_peak_103138	243.09	201	chr2:160750963-160756644+	243.09	10.3	12.78	NA	novel	NM_021280	Plcg1	exonic	1971
chr9	31053239	31053481	MACS_peak_173926	235.8	242	chr9:31053240-31054313+	235.8	15.96	13.04	9_30861898_30860825_-1073|15.27|11|24	PMID:25714049	NM_172765	Zbtb44	exonic	1074
chr2	26060189	26060792	MACS_peak_102068	232.16	603	chr2:26060190-26064618-	232.16	6.55	7.03	NA	novel	NM_026495	Nacc2	sense overlapping	4429
chr6	28426162	28426561	MACS_peak_152989	228.07	399	chr6:28426163-28426561+	228.07	4.63	11.25	NA	novel	NM_007480	Arf5	sense overlapping	399
chr7	81898958	81900575	MACS_peak_168956	226.22	1617	chr7:81892964-81905636-	226.22	5.84	11.29	NA	novel	NM_013886	Hdgfrp3	sense overlapping	12673
chr3	105458738	105459921	MACS_peak_123113	221.55	1183	chr3:105458739-105459921+	221.55	5.09	7.28	3_105262839_105261657_-1182|19.69|3|5	PMID:25714049	NM_001039347	Kcnd3	exonic	1183
chr16	93769393	93770638	MACS_peak_78706	220.16	1245	chr16:93766126-93771026+	220.16	6.11	7.29	NA	novel	NM_027293	Dopey2	exonic	1824
chr8	95713801	95714435	MACS_peak_186573	213.72	634	chr8:95713802-95714435+	213.72	3.99	7.51	NA	novel	NM_145602	Ndrg4	sense overlapping	634
chr1	106029763	106031233	MACS_peak_6531	210.72	1470	chr1:106006015-106031233+	210.72	5.33	13.87	NA	novel	NM_001122676	Zcchc2	exonic	2326
chr6	121412507	121413616	MACS_peak_164048	208.92	1109	chr6:121410614-121413616-	208.92	5.88	7.53	6_121363634_121360632_-3002|16.51|5|6	PMID:25714049	NR_110358	Iqsec3	exonic	1271
chr15	80117250	80117794	MACS_peak_67065	202.19	544	chr15:80117251-80117794+	202.19	7.41	12.37	NA	novel	NM_207708	Syngr1	sense overlapping	544
chr15	78672972	78674740	MACS_peak_66749	200.82	1768	chr15:78671856-78674740-	200.82	8	12.44	mmu_circ_0000618	circBase	NM_183141	Elfn2	sense overlapping	2885
chr6	113309802	113310408	MACS_peak_162766	198.98	606	chr6:113309803-113310408+	198.98	5.78	7.84	NA	novel	NM_030178	Brpf1	exonic	606
chr8	124860945	124861271	MACS_peak_185464	189.06	326	chr8:124841294-124861271-	189.06	3.9	12.91	NA	novel	NM_025615	2810004N23Rik	exonic	566
chr8	25649540	25649703	MACS_peak_181121	187.69	163	chr8:25640577-25649703+	187.69	9.8	8	8_26760175_26751049_-9126|20.30|17|25	PMID:25714049	NM_001001735	Whsc1l1	exonic	984
chr10	109823037	109823979	MACS_peak_22390	184.98	942	chr10:109816254-109824681+	184.98	7.06	13.12	NA	novel	NM_001081035	Nav3	antisense	8428
chr12	57282917	57283902	MACS_peak_36862	183.55	985	chr12:57238363-57307464+	183.55	12.45	14.6	NA	novel	NM_001037746	Prps1l3	sense overlapping	69102
chr2	166954899	166955130	MACS_peak_114716	179.61	231	chr2:166953208-166955130-	179.61	5.05	8.19	NA	novel	NR_111895	Stau1	exonic	375
chr4	108478872	108479928	MACS_peak_120773	179.32	1056	chr4:108478873-108491464-	179.32	6.41	14.7	NA	novel	ENSMUST00000119769	Gm12739	sense overlapping	12592
chr2	132808055	132809103	MACS_peak_109226	173.91	1048	chr2:132805143-132812175-	173.91	8.43	13.62	NA	novel	NM_175113	Trmt6	sense overlapping	7033
chr11	118301263	118301557	MACS_peak_36241	172.58	294	chr11:118301264-118301557-	172.58	4.95	8.51	NA	novel	NM_011594	Timp2	sense overlapping	294
chr5	135064724	135064962	MACS_peak_152543	170.38	238	chr5:135064725-135064962+	170.38	5.14	8.48	NA	novel	NM_025362	Dnajc30	sense overlapping	238
chr7	57792491	57792629	MACS_peak_166937	168.16	138	chr7:57765424-57792629+	168.16	12.74	13.85	7_65047999_65020794_-27205|16.85|8|20	PMID:25714049	NM_008071	Gabrb3	exonic	442
chr11	108922201	108922352	MACS_peak_31824	162.65	151	chr11:108922202-108922352-	162.65	10.26	15.66	NA	novel	NM_015732	Axin2	antisense	151
chr2	152780565	152782282	MACS_peak_110761	160.23	1717	chr2:152756887-152782282-	160.23	5.18	14.29	NA	novel	NM_009743	Bcl2l1	sense overlapping	25396
chr5	34628414	34628513	MACS_peak_143410	160.04	99	chr5:34619350-34628513+	160.04	7.44	8.88	5_34971162_34961999_-9163|15.66|2|3	PMID:25714049	NM_013457	Add1	exonic	448
chr5	33744817	33745191	MACS_peak_140489	152.46	374	chr5:33742440-33745191-	152.46	4.84	14.84	NA	novel	NM_019694	Letm1	sense overlapping	2752
chr6	119944700	119944784	MACS_peak_163821	147.47	84	chr6:119943806-119951131-	147.47	6.07	9.36	NA	novel	NM_198703	Wnk1	exonic	2146
chr2	91805023	91805272	MACS_peak_107532	146.21	249	chr2:91805024-91810209-	146.21	9.87	9.4	NA	novel	NM_172669	Ambra1	antisense	5186
chr6	90694558	90694850	MACS_peak_161205	145.72	292	chr6:90689580-90694850-	145.72	4.29	9.3	mmu_circ_0001493	circBase	NM_001134383	Iqsec1	exonic	1539
chr7	35793522	35795618	MACS_peak_165405	144.49	2096	chr7:35793523-35795618-	144.49	5.15	15.46	NA	novel	NM_177739	Zfp507	exonic	2096
chr18	84331714	84332353	MACS_peak_92732	142.94	639	chr18:84315806-84407793-	142.94	9.83	15.46	mmu_circ_0007573	circBase	ENSMUST00000125450	Zfp407	intronic	91988
chr18	82955523	82957449	MACS_peak_94231	139.93	1926	chr18:82955524-82957449+	139.93	5.35	9.59	mmu_circ_0000909	circBase	NM_183033	Zfp516	exonic	1926
chr15	39292101	39292312	MACS_peak_59127	139.17	211	chr15:39274976-39292312+	139.17	5.91	17.06	15_39123858_39106522_-17336|15.86|7|12	PMID:25714049	NM_053271	Rims2	exonic	331
chr17	35117856	35118668	MACS_peak_82977	137.33	812	chr17:35117857-35118668-	137.33	4.7	9.72	NA	novel	NM_009975	Csnk2b	sense overlapping	812
chr17	3191663	3192229	MACS_peak_79256	132.41	566	chr17:3145075-3198223+	132.41	8.51	9.79	NA	novel	NM_134123	Scaf8	sense overlapping	53149
chr14	65075583	65078189	MACS_peak_59465	131.58	2606	chr14:65066683-65080475-	131.58	4.72	9.83	14_65699312_65685520_-13792|20.95|12|27	PMID:25714049	NM_018788	Extl3	exonic	2830
chr17	12270862	12272220	MACS_peak_79210	128.8	1358	chr17:12270863-12272220-	128.8	5.16	16.68	NA	novel	NM_011948	Map3k4	exonic	1358
chr2	93811896	93811986	MACS_peak_107843	128.64	90	chr2:93806025-93813964-	128.64	8.57	9.9	2_93654121_93646182_-7939|16.79|7|11	PMID:25714049	NM_010163	Ext2	exonic	773
chr8	117416214	117416256	MACS_peak_184278	128.41	42	chr8:117411261-117436919+	128.41	7.78	16.65	mmu_circ_0014624	circBase	NM_028941	Cmip	exonic	911
chr11	50381510	50382715	MACS_peak_27337	122.14	1205	chr11:50381511-50382715+	122.14	11.2	17.06	NA	novel	NM_021510	Hnrnph1	sense overlapping	1205
chr4	34562311	34562455	MACS_peak_128178	120.88	144	chr4:34562312-34565277+	120.88	4.1	10.43	NA	novel	NM_001007589	Akirin2	exonic	294
chr7	24228047	24228943	MACS_peak_164085	120.18	896	chr7:24228048-24229840-	120.18	7.14	17.3	mmu_circ_0001550	circBase	ENSMUST00000037448	Zfp109	exonic	1793
chr7	133759399	133759913	MACS_peak_174043	117.71	514	chr7:133759400-133759913-	117.71	3.69	17.57	7_140951596_140951083_-513|19.58|3|4	PMID:25714049	NM_133941	Dhx32	exonic	514
chr13	28949844	28951638	MACS_peak_48049	112.09	1794	chr13:28949845-28951638-	112.09	8.82	10.78	NA	novel	NM_009238	Sox4	sense overlapping	1794
chr18	13843781	13845614	MACS_peak_80013	102.69	1833	chr18:13843782-13847134-	102.69	3.85	20.14	18_14005643_14002291_-3352|18.21|2|2	PMID:25714049	NM_145492	Zfp521	exonic	3353
chr3	133485511	133488717	MACS_peak_122501	101.58	3206	chr3:133485512-133488717-	101.58	4.46	19.01	3_133151681_133148476_-3205|19.87|5|9	PMID:25714049	NM_001040400	Tet2	exonic	3206
chr16	14099925	14100907	MACS_peak_65876	101.39	982	chr16:14099926-14100907+	101.39	3.28	20.28	NA	novel	NM_144518	2900011O08Rik	sense overlapping	982
chr3	88761725	88762549	MACS_peak_121387	100.78	824	chr3:88761726-88762549-	100.78	2.78	11.41	3_88566471_88565648_-823|20.63|6|8	PMID:25714049	NM_018804	Syt11	exonic	824
chr3	52345038	52346464	MACS_peak_107641	95.38	1426	chr3:52345039-52348247+	95.38	4.14	20.79	3_52152169_52148961_-3208|15.74|2|2	PMID:25714049	NM_019739	Foxo1	sense overlapping	3209
chr8	125491110	125492833	MACS_peak_189635	95.21	1723	chr8:125491111-125492833-	95.21	4.08	11.88	mmu_circ_0001734	circBase	uc009nye.1	Sipa1l2	exonic	1723
chr1	93749846	93750985	MACS_peak_6714	94.25	1139	chr1:93749847-93750985-	94.25	5.89	12.01	1_95647562_95646424_-1138|17.08|2|2	PMID:25714049	NM_025920	Thap4	exonic	1139
chr5	140760140	140760330	MACS_peak_138654	93.46	190	chr5:140760141-140760330-	93.46	3.23	21.1	NA	novel	NM_010302	Gna12	sense overlapping	190
chr3	79480656	79481879	MACS_peak_120520	82.57	1223	chr3:79479487-79481879-	82.57	5.12	13.02	3_79285801_79283409_-2392|23.05|8|13	PMID:25714049	NM_001162999	Fnip2	exonic	1478
chr17	85005536	85005566	MACS_peak_86700	75.68	30	chr17:84993680-85005566+	75.68	4	13.58	NA	novel	NM_011151	Ppm1b	exonic	1148
chr11	8492092	8493337	MACS_peak_24856	72.9	1245	chr11:8492093-8493337-	72.9	4.25	13.67	NA	novel	NM_001083587	Tns3	exonic	1245
chr2	120533510	120535679	MACS_peak_109623	70.58	2169	chr2:120533511-120535679+	70.58	4.34	14.04	NA	novel	ENSMUST00000181963	Gm26899	sense overlapping	2169
chr11	20241885	20242238	MACS_peak_25156	65.13	353	chr11:20236006-20242238-	65.13	3.85	24.8	NA	novel	NM_172260	Cep68	exonic	2076
chr3	9693300	9694126	MACS_peak_114752	58.4	826	chr3:9693172-9696178-	58.4	3.21	26.46	NA	novel	NM_053182	Pag1	sense overlapping	3007

## Sheet: OGDR3h-m1A_circRNA
Chromosome	Transcript start	Transcript end	Peak ID	Score	Peak length	circRNA	P value (-log10)	Fold enrichment	FDR	circBaseID	Source	Best transcript	Gene name	Catalog	Predicted sequence length
chr11	30142119	30142422	MACS_peak_26838	3233.06	303	chr11:30142120-30143177-	3233.06	11.89	0	NA	novel	NM_009260	Sptbn1	exonic	462
chr12	111789125	111789406	MACS_peak_50840	3101.98	281	chr12:111787553-111789406+	3101.98	24.37	3.12	NA	novel	NM_008450	Klc1	sense overlapping	1854
chr1	152845293	152845688	MACS_peak_11223	3100	395	chr1:152845294-152848760-	3100	31.33	9.74	NA	novel	NM_001005507	Smg7	sense overlapping	3467
chr1	162710087	162710424	MACS_peak_12517	3100	337	chr1:162672608-162710424-	3100	23.27	9.74	NA	novel	NM_001081290	Prrc2c	sense overlapping	37817
chr1	181923734	181924037	MACS_peak_14524	3100	303	chr1:181923735-181930729-	3100	17.15	9.74	NA	novel	NM_008680	Enah	sense overlapping	6995
chr10	25501823	25502387	MACS_peak_17705	3100	564	chr10:25479009-25507857+	3100	18.11	9.74	NA	novel	NM_013511	Epb4.1l2	exonic	1644
chr10	63017033	63019527	MACS_peak_20785	3100	2494	chr10:63014452-63019527-	3100	23.01	9.74	NA	novel	NM_001079824	Hnrnph3	sense overlapping	5076
chr11	75751998	75752653	MACS_peak_34094	3100	655	chr11:75751999-75755615+	3100	12.36	9.74	NA	novel	NM_009536	Ywhae	sense overlapping	3617
chr11	77841960	77842568	MACS_peak_34466	3100	608	chr11:77841961-77842568+	3100	20.22	9.74	NA	novel	NM_011586	Myo18a	sense overlapping	608
chr12	29811372	29811734	MACS_peak_42912	3100	362	chr12:29811373-29827831+	3100	48.63	9.74	12_30512696_30496238_-16458|13.72|2|3	PMID:25714049	NM_008666	Myt1l	exonic	1328
chr13	83575534	83575730	MACS_peak_57441	3100	196	chr13:83575535-83575730+	3100	13.22	9.74	NA	novel	uc007rih.2	Mef2c	exonic	196
chr13	103752150	103753343	MACS_peak_58956	3100	1193	chr13:103743635-103764419-	3100	14.11	9.74	NA	novel	NM_172592	Srek1	sense overlapping	20785
chr14	75323030	75324803	MACS_peak_66750	3100	1773	chr14:75291569-75339489+	3100	20.86	9.74	NA	novel	NM_026083	Zc3h13	sense overlapping	47921
chr17	56566577	56566963	MACS_peak_93453	3100	386	chr17:56566578-56566963-	3100	15.73	9.74	NA	novel	ENSMUST00000156640	Safb2	intronic	386
chr3	28564074	28564250	MACS_peak_129702	3100	176	chr3:28493967-28564250+	3100	19.13	9.74	NA	novel	NM_026910	Tnik	exonic	826
chr3	84190512	84191236	MACS_peak_133230	3100	724	chr3:84190513-84193372-	3100	15.39	9.74	3_83997294_83994435_-2859|22.15|3|3	PMID:25714049	NM_030706	Trim2	exonic	1057
chr4	32756415	32756714	MACS_peak_141127	3100	299	chr4:32756416-32757906+	3100	52.87	9.74	NA	novel	ENSMUST00000125323	Mdn1	intronic	1491
chr4	109013509	109013840	MACS_peak_147489	3100	331	chr4:109013510-109024277+	3100	22.3	9.74	4_108696882_108686115_-10767|14.68|3|4	PMID:25714049	NM_146150	Nrd1	exonic	641
chr4	133720549	133720999	MACS_peak_150688	3100	450	chr4:133719537-133723051-	3100	17.14	9.74	mmu_circ_0001283	circBase	NM_001080819	Arid1a	exonic	780
chr4	150406195	150407036	MACS_peak_153127	3100	841	chr4:150406196-150417300+	3100	20.97	9.74	4_149791409_149780305_-11104|17.36|2|2	PMID:25714049	NM_001085492	Rere	sense overlapping	11105
chr5	104092377	104093373	MACS_peak_162646	3100	996	chr5:104090392-104093373-	3100	12.97	9.74	NA	novel	NM_010097	Sparcl1	exonic	1066
chr6	83191334	83191662	MACS_peak_175933	3100	328	chr6:83191335-83191662+	3100	11.02	9.74	NA	novel	NM_007835	Dctn1	sense overlapping	328
chr7	99345717	99345890	MACS_peak_190811	3100	173	chr7:99345718-99345890-	3100	20.95	9.74	NA	novel	NM_009825	Serpinh1	sense overlapping	173
chr8	84706664	84707414	MACS_peak_203347	3100	750	chr8:84706665-84707414-	3100	16.17	9.74	NA	novel	ENSMUST00000148644	Nfix	intronic	750
chr9	73011977	73012157	MACS_peak_216068	3100	180	chr9:73011978-73012157+	3100	14.31	9.74	NA	novel	NM_028181	Ccpg1	sense overlapping	180
chrY	90736913	90740833	MACS_peak_227667	3100	3920	chrY:90736914-90819638+	3100	29.7	9.74	NA	novel	NM_133362	Erdr1	sense overlapping	82725
chr15	30669225	30670059	MACS_peak_65511	3100	834	chr15:30634644-30698644+	3100	18.53	7.3	NA	novel	NM_008729	Ctnnd2	sense overlapping	64001
chr19	28546161	28546902	MACS_peak_98519	3100	741	chr19:28530873-28548423-	3100	90.16	7.3	NA	novel	NM_175459	Glis3	sense overlapping	17551
chrX	170010673	170011612	MACS_peak_206141	3100	939	chrX:170010674-170019058+	3100	17.1	7.98	NA	novel	ENSMUST00000178789	Gm21887	sense overlapping	8385
chr9	49564868	49565041	MACS_peak_212890	3062.89	173	chr9:49543011-49569900-	3062.89	17.06	9.65	9_49378005_49351116_-26889|22.99|2|2	PMID:25714049	NM_010875	Ncam1	exonic	1746
chr3	75894834	75895137	MACS_peak_132745	2785.94	303	chr3:75894835-75898132-	2785.94	24.76	9.25	mmu_circ_0010789	circBase	NM_175193	Golim4	exonic	465
chr9	65794451	65795495	MACS_peak_214957	2784.46	1044	chr9:65786582-65795495-	2784.46	10.67	9.24	NA	novel	NM_172536	Zfp609	sense overlapping	8914
chr6	93679236	93679410	MACS_peak_163721	2569.41	174	chr6:93679237-93679410-	2569.41	14.14	6.76	NA	novel	ENSMUST00000055224	Magi1	intronic	174
chr4	8751323	8753148	MACS_peak_139844	2309.93	1825	chr4:8751324-8753148+	2309.93	6.7	8.86	4_8680295_8678471_-1824|20.33|6|12	PMID:25714049	NM_001277149	Chd7	exonic	1825
chr4	138125243	138126082	MACS_peak_151452	2300.24	839	chr4:138120423-138126082+	2300.24	16.55	8.82	NA	novel	NM_172703	Eif4g3	sense overlapping	5660
chr7	25290263	25290612	MACS_peak_166652	2260.33	349	chr7:25289544-25290612+	2260.33	10.35	7.14	NA	novel	NM_027882	Cic	sense overlapping	1069
chr1	66380696	66381287	MACS_peak_5015	2214.69	591	chr1:66380697-66399417+	2214.69	7.76	8.45	NA	novel	NM_008632	Map2	sense overlapping	18721
chr1	155932788	155933450	MACS_peak_11627	2145.89	662	chr1:155906489-155962560-	2145.89	25.8	8.38	NA	novel	NM_001039184	Cep350	exonic	4784
chr9	107767542	107767708	MACS_peak_198588	2101.44	166	chr9:107765495-107767708-	2101.44	10.74	6.88	9_107670039_107667826_-2213|12.90|5|7	PMID:25714049	NM_148930	Rbm5	exonic	322
chr12	85028800	85030887	MACS_peak_47748	2052.19	2087	chr12:85028770-85034034+	2052.19	9.95	8.11	mmu_circ_0000402	circBase	NM_178363	Ylpm1	exonic	2236
chr6	125123997	125124025	MACS_peak_166398	2028.38	28	chr6:125123998-125124328+	2028.38	15.29	6.32	NA	novel	ENSMUST00000056889	Chd4	intronic	331
chr18	75521376	75521869	MACS_peak_103365	1979.52	493	chr18:75519739-75521869-	1979.52	21.5	7.88	18_75681523_75679393_-2130|17.53|14|123	PMID:25714049	NM_201354	Ctif	exonic	862
chr1	135584554	135585355	MACS_peak_9242	1968.11	801	chr1:135584555-135585355-	1968.11	19.5	6.56	NA	novel	NM_173437	Nav1	exonic	801
chr19	45767393	45768007	MACS_peak_108875	1932.5	614	chr19:45761104-45777017-	1932.5	11.75	7.68	NA	novel	NM_023799	Mgea5	exonic	1826
chr12	71067245	71067787	MACS_peak_45717	1873.13	542	chr12:71067246-71069918+	1873.13	22.21	7.46	NA	novel	NM_001081195	Arid4a	sense overlapping	2673
chr18	5772392	5773094	MACS_peak_89274	1860.8	702	chr18:5705043-5773094+	1860.8	7.84	6.45	18_5773092_5705041_-68051|13.10|7|16	PMID:25714049	NM_011546	Zeb1	sense overlapping	68052
chr5	14668964	14669675	MACS_peak_142638	1839.65	711	chr5:14668965-14669675+	1839.65	6.91	6.39	5_14669675_14668965_-710|20.39|2|2	PMID:25714049	NM_011995	Pclo	exonic	711
chr6	83402666	83404824	MACS_peak_162365	1741.04	2158	chr6:83402667-83404824-	1741.04	5.87	6.09	6_83354818_83352661_-2157|23.66|10|22	PMID:25714049	NM_183138	Tet3	exonic	2158
chr5	100407156	100407280	MACS_peak_149561	1738.54	124	chr5:100378828-100408113-	1738.54	26.65	6.09	NA	novel	NM_026969	Sec31a	exonic	2500
chr4	132006957	132007438	MACS_peak_150337	1677.77	481	chr4:131967788-132007438-	1677.77	10.46	6.91	NA	novel	NM_183428	Epb4.1	exonic	1834
chr2	29227392	29228420	MACS_peak_104263	1591.49	1028	chr2:29207418-29248878-	1591.49	14.68	6.25	NA	novel	NM_133500	Ntng2	sense overlapping	41461
chr8	48417007	48417245	MACS_peak_200373	1341.12	238	chr8:48367311-48417245-	1341.12	16.08	6.39	8_49502599_49452665_-49934|22.29|17|72	PMID:25714049	NM_011857	Tenm3	exonic	600
chr18	54865714	54866646	MACS_peak_93114	1338.25	932	chr18:54802617-54900300-	1338.25	22.12	6.45	NA	novel	NM_175751	Zfp608	sense overlapping	97684
chr3	84903500	84904079	MACS_peak_122683	1240.12	579	chr3:84863964-84904079+	1240.12	10.1	6.34	3_84708001_84667886_-40115|17.73|21|64	PMID:25714049	NM_001177773	Fbxw7	exonic	691
chr8	107368422	107368596	MACS_peak_186090	1227.68	174	chr8:107368423-107368596+	1227.68	7.69	5.45	NA	novel	NR_039557	Mir5098	intronic	174
chrX	71117633	71119394	MACS_peak_202407	1206.09	1761	chrX:71101485-71121468+	1206.09	8.11	5.42	mmu_circ_0016337	circBase	NM_001081354	Mamld1	exonic	2184
chr6	149531290	149531486	MACS_peak_182314	1205.94	196	chr6:149531291-149531486+	1205.94	24.06	6.11	NA	novel	ENSMUST00000003544	Bicd1	intronic	196
chr12	3834732	3835458	MACS_peak_37057	1179.68	726	chr12:3829944-3873428+	1179.68	10.02	5.41	NA	novel	NM_007872	Dnmt3a	sense overlapping	43485
chr2	32193762	32194004	MACS_peak_102929	1148.01	242	chr2:32182458-32194501+	1148.01	6.42	5.41	NA	novel	NM_172661	Prrc2b	exonic	1031
chr4	128786892	128787220	MACS_peak_135513	1137.66	328	chr4:128785970-128790313-	1137.66	10.17	5.45	NA	novel	NM_001081098	Zfp362	exonic	864
chr10	59092669	59092915	MACS_peak_20189	1056.67	246	chr10:59092670-59092915+	1056.67	34.47	5.84	NA	novel	ENSMUST00000148267	Sh3rf3	intronic	246
chr10	43020836	43021331	MACS_peak_17374	1045.63	495	chr10:43004078-43021331-	1045.63	11.93	6.66	NA	novel	NM_175407	Sobp	sense overlapping	17254
chr11	78009400	78009794	MACS_peak_34516	1033.16	394	chr11:78006727-78009794+	1033.16	16	5.85	mmu_circ_0000298	circBase	NM_174852	Phf12	exonic	467
chr2	24635095	24635240	MACS_peak_103607	1030.71	145	chr2:24631899-24639210-	1030.71	8.94	6.78	mmu_circ_0000990	circBase	NM_001042528	Cacna1b	exonic	548
chr6	5045935	5046068	MACS_peak_169869	1029.77	133	chr6:5045936-5077615+	1029.77	34.66	5.83	6_5027615_4995936_-31679|18.34|15|43	PMID:25714049	NM_181595	Ppp1r9a	exonic	495
chr16	17655677	17655805	MACS_peak_72692	1029.07	128	chr16:17655444-17663496-	1029.07	8.05	5.73	NA	novel	NM_033609	Med15	exonic	376
chr5	103783123	103783194	MACS_peak_147286	1025.6	71	chr5:103783124-103784513+	1025.6	10.74	5.7	mmu_circ_0011938	circBase	NM_133919	Aff1	exonic	979
chr18	80970715	80974629	MACS_peak_104108	1022.13	3914	chr18:80969275-80974629-	1022.13	8.1	5.82	NA	novel	NM_178280	Sall3	sense overlapping	5355
chr5	67027487	67027568	MACS_peak_159876	1012.7	81	chr5:66969076-67034289+	1012.7	14.68	5.76	NA	novel	NM_001001980	Limch1	exonic	2450
chr4	44167118	44168098	MACS_peak_131061	1000.1	980	chr4:44133640-44187519-	1000.1	14.83	6.86	NA	novel	NM_175201	Rnf38	sense overlapping	53880
chr2	59920294	59920538	MACS_peak_107115	992.24	244	chr2:59907439-59932170-	992.24	11.52	6.81	2_59770227_59745496_-24731|17.61|8|27	PMID:25714049	NM_001001182	Baz2b	exonic	2765
chr2	161041984	161042132	MACS_peak_125548	947.11	148	chr2:161039194-161042132-	947.11	15.63	5.54	mmu_circ_0009540	circBase	NM_173368	Chd6	exonic	298
chr5	121797318	121797968	MACS_peak_149803	937.37	650	chr5:121797319-121802265+	937.37	9.51	5.76	NA	novel	NM_009125	Atxn2	sense overlapping	4947
chr10	7919113	7920614	MACS_peak_16180	918.01	1501	chr10:7919114-7920614-	918.01	9.43	5.56	10_7640412_7638912_-1500|17.44|2|5	PMID:25714049	NM_138667	Tab2	exonic	1501
chr1	34199291	34199558	MACS_peak_2002	880.51	267	chr1:34197201-34249638+	880.51	6.03	5.63	NA	novel	NM_133833	Dst	exonic	5742
chr7	81612260	81612371	MACS_peak_189164	861.68	111	chr7:81611306-81614499-	861.68	13.16	5.65	NA	novel	NM_011983	Homer2	exonic	349
chr4	118268976	118269317	MACS_peak_134085	826.47	341	chr4:118257612-118269317-	826.47	6.54	5.87	NA	novel	NM_011213	Ptprf	sense overlapping	11706
chr17	70761074	70761445	MACS_peak_94621	817.8	371	chr17:70761075-70766089+	817.8	10.03	5.73	mmu_circ_0000810	circBase	NM_027712	Dlgap1	exonic	463
chr5	110755396	110756766	MACS_peak_148032	772.62	1370	chr5:110719087-110756766-	772.62	6.69	5.76	5_111185785_111148106_-37679|19.68|2|2	PMID:25714049	NM_029337	Ep400	exonic	3333
chr18	78856483	78859931	MACS_peak_93637	763.8	3448	chr18:78856484-78859931-	763.8	5.45	5.75	mmu_circ_0000902	circBase	NM_053099	Setbp1	exonic	3448
chr6	119016387	119017246	MACS_peak_162791	750.04	859	chr6:119005038-119057515-	750.04	13.86	5.83	6_119007533_118955056_-52477|23.94|2|2	PMID:25714049	NM_009781	Cacna1c	sense overlapping	52478
chr11	74836364	74837723	MACS_peak_33879	745.44	1359	chr11:74836365-74837723+	745.44	10.34	5.64	NA	novel	NM_010813	Mnt	sense overlapping	1359
chr4	120094587	120098396	MACS_peak_148488	739.33	3809	chr4:120093964-120103854+	739.33	12.39	5.63	mmu_circ_0011118	circBase	NM_010657	Hivep3	exonic	5630
chr5	28361945	28362234	MACS_peak_156598	726.3	289	chr5:28331111-28362234+	726.3	25.01	5.57	mmu_circ_0012501	circBase	NM_028234	Rbm33	exonic	1308
chr10	62838175	62840378	MACS_peak_20741	711.4	2203	chr10:62832894-62840378-	711.4	12.56	5.65	10_62303126_62295642_-7484|19.94|16|78	PMID:25714049	NM_027384	Tet1	exonic	2388
chrX	69544408	69544967	MACS_peak_223069	710.5	559	chrX:69523436-69545269+	710.5	18.13	5.63	X_66798444_66776611_-21833|16.61|2|2	PMID:25714049	NM_008032	Aff2	exonic	994
chr6	38489652	38492077	MACS_peak_156677	704.95	2425	chr6:38440455-38502408+	704.95	12.51	5.88	6_38452408_38390455_-61953|11.84|11|21	PMID:25714049	NM_177185	Ubn2	sense overlapping	61954
chr11	53372277	53373057	MACS_peak_27936	689.49	780	chr11:53368660-53380672+	689.49	8.31	6.1	mmu_circ_0000262	circBase	NM_033565	Aff4	exonic	1039
chr15	82169737	82170154	MACS_peak_68238	672.5	417	chr15:82169738-82182257+	672.5	6.64	6.17	NA	novel	NM_033218	Srebf2	exonic	1917
chr7	49420173	49420340	MACS_peak_168900	667.87	167	chr7:49408633-49420340+	667.87	9.75	6.2	7_56675710_56664003_-11707|21.62|3|3	PMID:25714049	NM_175272	Nav2	exonic	441
chr11	6147595	6148509	MACS_peak_27822	667.48	914	chr11:6113243-6150835-	667.48	22.29	5.62	NA	novel	NM_173748	Nudcd3	sense overlapping	37593
chrX	160833867	160834834	MACS_peak_226843	655.42	967	chrX:160808475-160847017-	655.42	7.87	5.61	NA	novel	NM_001024624	Cdkl5	exonic	1969
chr14	120399912	120400064	MACS_peak_69210	652.62	152	chr14:120399913-120400064+	652.62	14.63	5.58	NA	novel	uc007uzt.1	Mbnl2	intronic	152
chr11	36300195	36300430	MACS_peak_26787	647.41	235	chr11:36273231-36300430-	647.41	14.69	6.38	11_36113932_36086733_-27199|22.83|2|2	PMID:25714049	NM_011856	Tenm2	exonic	474
chr5	123630224	123631169	MACS_peak_165555	627.23	945	chr5:123590793-123642616-	627.23	10.04	5.47	5_124092625_124040802_-51823|20.23|7|11	PMID:25714049	NM_019765	Clip1	exonic	2504
chr8	61349399	61349702	MACS_peak_200939	587.72	303	chr8:61349400-61353848+	587.72	10.26	5.5	8_63832645_63828197_-4448|18.22|2|3	PMID:25714049	NM_021506	Sh3rf1	exonic	414
chr7	7296723	7296878	MACS_peak_165671	581.69	155	chr7:7295970-7296878-	581.69	7.62	6.73	7_7249589_7248681_-908|17.71|11|32	PMID:25714049	NM_011334	Clcn4-2	exonic	255
chr8	79139567	79140672	MACS_peak_187054	578.19	1105	chr8:79118175-79180211-	578.19	18.93	8.4	NA	novel	NM_178267	Zfp827	antisense	62037
chr13	93498301	93498490	MACS_peak_52256	565.62	189	chr13:93498302-93498490-	565.62	12.08	6.66	NA	novel	NM_021310	Jmy	sense overlapping	189
chr1	56871311	56871784	MACS_peak_3915	563.68	473	chr1:56831439-56871784-	563.68	10.79	5.47	mmu_circ_0008810	circBase	NM_139146	Satb2	exonic	1040
chr18	36575018	36575169	MACS_peak_99669	551.97	151	chr18:36575019-36581215+	551.97	12.14	5.54	18_36740869_36734673_-6196|15.10|5|6	PMID:25714049	NM_175375	Ankhd1	exonic	456
chr15	78987891	78987948	MACS_peak_67613	536.12	57	chr15:78987892-79003792+	536.12	12.96	6.83	NA	novel	NM_138579	Triobp	exonic	1578
chr18	31666340	31666488	MACS_peak_89095	530.02	148	chr18:31653502-31677477+	530.02	11.67	6.8	NA	novel	NM_172965	Sap130	exonic	733
chr11	107672377	107673233	MACS_peak_34713	522.08	856	chr11:107670035-107686862+	522.08	11.02	6.86	NA	novel	NM_198298	Helz	sense overlapping	16828
chr9	47797502	47797739	MACS_peak_212684	496.58	237	chr9:47797503-47799472+	496.58	5.85	5.55	NA	novel	NM_018770	Cadm1	sense overlapping	1970
chr5	117554960	117555477	MACS_peak_149228	494.91	517	chr5:117554961-117555477+	494.91	10.37	7.12	5_118005486_118004970_-516|16.90|3|3	PMID:25714049	NM_001114545	Ksr2	exonic	517
chr6	38818229	38819313	MACS_peak_172871	488.57	1084	chr6:38818230-38819313-	488.57	9.83	5.6	mmu_circ_0001468	circBase	NM_010433	Hipk2	exonic	1084
chr17	91032286	91032862	MACS_peak_96750	486.67	576	chr17:91032287-91032862-	486.67	4.72	5.68	NA	novel	ENSMUST00000054059	Nrxn1	intronic	576
chr18	34803449	34804049	MACS_peak_91323	483.47	600	chr18:34795675-34813561+	483.47	10.16	9.03	NA	novel	NM_001081256	Kdm3b	exonic	2725
chr5	51495669	51495795	MACS_peak_143948	476.95	126	chr5:51490017-51498228-	476.95	10.78	7.18	mmu_circ_0012681	circBase	NM_008904	Ppargc1a	exonic	646
chr4	130727997	130728164	MACS_peak_138391	464.55	167	chr4:130668925-130728164+	464.55	11.52	9.19	4_130284079_130224840_-59239|14.02|11|14	PMID:25714049	NM_030722	Pum1	exonic	898
chr4	62322182	62322277	MACS_peak_132442	463.3	95	chr4:62312258-62323304-	463.3	7.73	9.16	NA	novel	NM_001045528	Fkbp15	exonic	615
chr5	99962322	99962581	MACS_peak_162139	458.98	259	chr5:99961293-99962581-	458.98	7.84	5.69	NA	novel	NM_007516	Hnrnpd	sense overlapping	1289
chr8	80791388	80791614	MACS_peak_202842	451.61	226	chr8:80784627-80800395-	451.61	10.22	5.73	8_83324294_83308526_-15768|17.58|11|16	PMID:25714049	NM_021356	Gab1	exonic	1516
chr10	42812254	42813033	MACS_peak_16733	450.69	779	chr10:42783442-42829039+	450.69	6.37	7.27	10_42548845_42503248_-45597|19.00|12|29	PMID:25714049	NM_153055	Sec63	sense overlapping	45598
chr5	146468258	146468435	MACS_peak_153490	450.4	177	chr5:146468259-146468435+	450.4	10.66	7.27	NA	novel	NM_145155	Wasf3	sense overlapping	177
chr15	83116141	83116490	MACS_peak_68348	416.79	349	chr15:83116142-83116490-	416.79	6.77	7.32	NA	novel	ENSMUST00000166766	Rrp7a	intronic	349
chr18	6482584	6483339	MACS_peak_97167	410.83	755	chr18:6467056-6493578-	410.83	18.41	5.83	NA	novel	ENSMUST00000115870	Epc1	intronic	26523
chr12	3389622	3389741	MACS_peak_37350	408.22	119	chr12:3387552-3390554+	408.22	9.34	10.06	12_3390554_3387552_-3002|17.39|8|16	PMID:25714049	NM_008445	Kif3c	exonic	461
chrX	74036933	74037332	MACS_peak_223364	405.6	399	chrX:74035348-74037332-	405.6	7.78	5.86	X_71282671_71280687_-1984|11.24|12|41	PMID:25714049	NM_010788	Mecp2	sense overlapping	1985
chr1	132017592	132018462	MACS_peak_9814	397.24	870	chr1:132014383-132019466+	397.24	7.11	5.82	mmu_circ_0008167	circBase	NM_007923	Elk4	exonic	1203
chr8	86860425	86861068	MACS_peak_203683	396.94	643	chr8:86860426-86862110-	396.94	12.95	5.82	mmu_circ_0001711	circBase	NM_030563	N4bp1	exonic	1685
chr4	21975290	21976150	MACS_peak_129551	391.43	860	chr4:21948692-21993632+	391.43	23.8	10.27	mmu_circ_0011526	circBase	NM_175234	Faxc	sense overlapping	44941
chr12	4416728	4416805	MACS_peak_41237	390.21	77	chr12:4335781-4416805-	390.21	13.46	5.82	12_4416805_4335781_-81024|24.49|10|19	PMID:25714049	NM_010881	Ncoa1	exonic	655
chr8	79371783	79372364	MACS_peak_187112	378.04	581	chr8:79343654-79372364-	378.04	5.73	10.53	8_81896263_81867553_-28710|22.15|7|8	PMID:25714049	NM_008539	Smad1	exonic	1435
chr12	3496126	3497105	MACS_peak_36989	367.71	979	chr12:3442474-3502368+	367.71	10.72	8.01	12_3502368_3442474_-59894|17.28|4|5	PMID:25714049	NM_172421	Asxl2	sense overlapping	59895
chr6	22925829	22925895	MACS_peak_155092	367.29	66	chr6:22925830-23000199+	367.29	8.78	8.03	6_22950199_22875830_-74369|14.03|7|7	PMID:25714049	uc012eim.1	Ptprz1	exonic	2229
chr13	59504193	59504310	MACS_peak_56022	361.4	117	chr13:59460469-59504310-	361.4	9.27	6.12	13_59605671_59561830_-43841|11.44|7|9	PMID:25714049	NM_023328	Agtpbp1	exonic	2294
chr5	81646409	81646712	MACS_peak_145914	355.74	303	chr5:81646410-81648732+	355.74	14.13	8.11	5_82077757_82075435_-2322|18.70|8|11	PMID:25714049	NM_198702	Adgrl3	exonic	407
chr8	70402239	70403409	MACS_peak_186231	355.6	1170	chr8:70397746-70409011+	355.6	7.59	10.93	NA	novel	NM_001004062	Crtc1	antisense	11266
chr14	32526148	32526878	MACS_peak_57897	352.93	730	chr14:32518943-32541354+	352.93	6.76	10.95	NA	novel	NM_001081221	Ercc6	exonic	1092
chr7	44883921	44884118	MACS_peak_168264	348.65	197	chr7:44883204-44884118-	348.65	6.91	8.13	NA	novel	ENSMUST00000003049	Med25	intronic	915
chr3	88907988	88908607	MACS_peak_121123	348.41	619	chr3:88901578-88908789+	348.41	7.26	8.14	3_88712711_88705500_-7211|18.11|2|2	PMID:25714049	NM_027389	Gon4l	exonic	1452
chr1	84559038	84560146	MACS_peak_6473	339.95	1108	chr1:84556566-84577321-	339.95	22.76	6.37	NA	novel	ENSMUST00000049126	Dner	intronic	20756
chr1	13221306	13221479	MACS_peak_636	338.05	173	chr1:13221307-13224713-	338.05	8.68	6.4	mmu_circ_0000010	circBase	NM_008678	Ncoa2	exonic	278
chr2	153392840	153392934	MACS_peak_114641	336.8	94	chr2:153391529-153392934+	336.8	11.04	11.21	NA	novel	NM_001039939	Asxl1	exonic	313
chr11	77137179	77138450	MACS_peak_31375	328.57	1271	chr11:77113608-77200153-	328.57	11.99	11.38	11_77013655_76927110_-86545|19.12|2|4	PMID:25714049	NM_176965	Efcab5	sense overlapping	86546
chr7	128452339	128453743	MACS_peak_179396	326.22	1404	chr7:128442462-128455032-	326.22	8.37	11.39	NA	novel	NM_009383	Tial1	sense overlapping	12571
chr1	165908680	165908988	MACS_peak_11239	323.05	308	chr1:165875382-165915163-	323.05	16.12	8.42	NA	novel	NM_011137	Pou2f1	sense overlapping	39782
chr10	75652290	75652380	MACS_peak_19898	322.83	90	chr10:75651449-75652380-	322.83	8.11	11.46	NA	novel	ENSMUST00000001712	Cabin1	intronic	932
chr2	104208081	104208206	MACS_peak_119783	304.08	125	chr2:104192435-104214275-	304.08	11.17	6.57	2_104054432_104032592_-21840|18.91|13|66	PMID:25714049	NM_001033347	D430041D05Rik	exonic	837
chr12	34389244	34389462	MACS_peak_43287	294.73	218	chr12:34373878-34402867-	294.73	9.3	6.73	12_35087732_35058743_-28989|15.20|7|11	PMID:25714049	NM_001271386	Hdac9	exonic	929
chr9	56259466	56260685	MACS_peak_213569	287.72	1219	chr9:56257527-56260762-	287.72	6.34	6.72	mmu_circ_0001776	circBase	NM_172924	Peak1	exonic	3236
chr17	27988719	27988916	MACS_peak_81489	274.4	197	chr17:27974905-27988916+	274.4	17.35	9.17	NA	novel	NM_181413	Anks1	exonic	1075
chr6	85347779	85348455	MACS_peak_162653	269.34	676	chr6:85347780-85348991-	269.34	9.96	12.96	6_85298985_85297774_-1211|21.94|15|34	PMID:25714049	NM_177466	Rab11fip5	exonic	1113
chr5	148077858	148078406	MACS_peak_153613	264.35	548	chr5:148076180-148083197+	264.35	15.24	9.28	5_148894773_148887756_-7017|17.66|8|14	PMID:25714049	NM_029920	Mtus2	exonic	2620
chr3	56008235	56008428	MACS_peak_131656	259.13	193	chr3:55967912-56058830-	259.13	6.23	6.8	3_55862752_55771834_-90918|16.13|10|12	PMID:25714049	NM_030595	Nbea	exonic	4127
chr7	37479382	37480849	MACS_peak_167858	258.24	1467	chr7:37479281-37480849-	258.24	11.96	9.44	7_38265868_38264300_-1568|20.30|13|42	PMID:25714049	uc009gkk.1	Zfp536	exonic	1569
chr12	98688189	98689628	MACS_peak_44707	254.93	1439	chr12:98682519-98689628-	254.93	4.6	13.51	NA	novel	NM_011877	Ptpn21	exonic	1799
chr14	18597713	18598240	MACS_peak_61407	253.72	527	chr14:18574307-18630431-	253.72	19.02	6.83	14_19462945_19406821_-56124|17.78|8|17	PMID:25714049	NM_144839	Ube2e2	sense overlapping	56125
chr9	77229502	77230776	MACS_peak_216303	252.28	1274	chr9:77164765-77230954-	252.28	6.89	6.92	9_77078761_77012572_-66189|13.93|5|5	PMID:25714049	ENSMUST00000184322	Mlip	exonic	1887
chr10	117367619	117367988	MACS_peak_22948	251.38	369	chr10:117349311-117367988-	251.38	6.54	9.52	10_116805044_116786367_-18677|13.57|9|15	PMID:25714049	NM_001013391	Cpsf6	sense overlapping	18678
chr1	63065703	63065837	MACS_peak_4660	246.93	134	chr1:63065704-63086398-	246.93	11.89	7.03	NA	novel	NM_001081436	Ino80d	exonic	1309
chr11	24085320	24085650	MACS_peak_25780	246.11	330	chr11:24085321-24085650+	246.11	6.8	9.73	11_23985650_23985321_-329|16.41|10|24	PMID:25714049	NM_016707	Bcl11a	exonic	330
chr9	45706582	45706665	MACS_peak_212344	239.45	83	chr9:45706511-45706665+	239.45	13.25	7.12	NA	novel	ENSMUST00000034592	Dscaml1	intronic	155
chr4	136693310	136693810	MACS_peak_151143	234.95	500	chr4:136693311-136693810-	234.95	10.51	7.2	NA	novel	NM_010142	Ephb2	sense overlapping	500
chr9	13700693	13700965	MACS_peak_208744	234.47	272	chr9:13697311-13707941+	234.47	10.88	7.19	NA	novel	NM_173776	Maml2	sense overlapping	10631
chrX	157996341	157996863	MACS_peak_209508	231.42	522	chrX:157990108-157999429-	231.42	5.65	14.39	X_154437361_154428040_-9321|15.17|6|12	PMID:25714049	NM_177751	Cnksr2	sense overlapping	9322
chr3	51855498	51857076	MACS_peak_118646	229.65	1578	chr3:51855499-51857076-	229.65	8.3	9.88	mmu_circ_0001126	circBase	NM_001004176	Maml3	exonic	1578
chr11	20727365	20727639	MACS_peak_28543	228.78	274	chr11:20725685-20727639-	228.78	8.22	7.18	mmu_circ_0000242	circBase	NM_181411	Aftph	exonic	1955
chr1	125981382	125981697	MACS_peak_9028	226.87	315	chr1:125981383-125981697-	226.87	15.83	7.2	1_127878274_127877960_-314|18.86|5|9	PMID:25714049	NM_172484	Nckap5	exonic	315
chr15	64149605	64149675	MACS_peak_73932	225.12	70	chr15:64149606-64173292-	225.12	9.38	7.21	NA	novel	NM_010026	Asap1	exonic	720
chr18	6065528	6066018	MACS_peak_97119	221.54	490	chr18:6052862-6073286-	221.54	9.34	7.2	18_6073284_6052860_-20424|17.46|2|3	PMID:25714049	NM_029277	Arhgap12	sense overlapping	20425
chr2	9951113	9952945	MACS_peak_111391	218.65	1832	chr2:9940927-9952945-	218.65	5.34	7.26	2_9874572_9862554_-12018|18.79|3|4	PMID:25714049	NM_027748	Taf3	exonic	1915
chr10	109823045	109823750	MACS_peak_25330	207.31	705	chr10:109816254-109824681+	207.31	7.07	7.45	NA	novel	NM_001081035	Nav3	antisense	8428
chr10	69898040	69898139	MACS_peak_21230	202.17	99	chr10:69892322-69904270+	202.17	5.95	7.45	10_69367018_69355070_-11948|12.69|3|4	PMID:25714049	NM_146005	Ank3	exonic	664
chr6	134222864	134223029	MACS_peak_163873	198.95	165	chr6:134137285-134233653+	198.95	14.88	10.46	NA	novel	NM_007961	Etv6	exonic	433
chr1	174608381	174609952	MACS_peak_13612	193.71	1571	chr1:174593061-174612651+	193.71	7.07	7.55	1_176542782_176523192_-19590|17.97|6|7	PMID:25714049	NM_019445	Fmn2	exonic	1772
chr11	77398204	77398253	MACS_peak_31425	191.37	49	chr11:77393050-77398269+	191.37	8.5	16.16	11_77211771_77206552_-5219|18.85|5|6	PMID:25714049	NM_177710	Ssh2	exonic	169
chr8	3258382	3258934	MACS_peak_180987	191.25	552	chr8:3258383-3258934-	191.25	6.66	16.16	8_3258934_3258383_-551|17.49|20|176	PMID:25714049	NM_010568	Insr	exonic	552
chr15	100936270	100936599	MACS_peak_78492	191.12	329	chr15:100936271-100936600+	191.12	5.26	7.6	15_100767031_100766702_-329|16.82|9|21	PMID:25714049	NM_011323	Scn8a	exonic	330
chr12	72786671	72786789	MACS_peak_45972	190.72	118	chr12:72783683-72786789+	190.72	9.42	7.61	12_73887776_73884670_-3106|15.36|13|25	PMID:25714049	NM_008910	Ppm1a	exonic	972
chr4	108520206	108520221	MACS_peak_135897	187.54	15	chr4:108507907-108548170+	187.54	17.88	16.38	4_108220775_108180512_-40263|20.07|3|3	PMID:25714049	NM_175472	Zcchc11	exonic	2414
chr4	104599079	104599254	MACS_peak_146911	182.49	175	chr4:104599080-104599254+	182.49	17.19	7.67	NA	novel	ENSMUST00000106826	Dab1	intronic	175
chr4	129842460	129842950	MACS_peak_135717	179.51	490	chr4:129838978-129847868+	179.51	5.61	11.19	NA	novel	NM_008974	Ptp4a2	sense overlapping	8891
chr5	108625029	108625091	MACS_peak_150402	178.8	62	chr5:108609391-108625091-	178.8	7.45	16.96	NA	novel	NM_153569	Gak	exonic	596
chr1	183135397	183135876	MACS_peak_14683	172.63	479	chr1:183135355-183135876-	172.63	7.68	7.8	NA	novel	NM_026866	Disp1	exonic	522
chr5	147484969	147485464	MACS_peak_153573	165.96	495	chr5:147450653-147503202+	165.96	12.66	11.55	5_148314778_148262229_-52549|11.54|11|19	PMID:25714049	NM_028291	Pan3	sense overlapping	52550
chr4	154528581	154528931	MACS_peak_141637	163.75	350	chr4:154476639-154528931-	163.75	4.34	17.61	4_153903040_153850748_-52292|19.99|3|7	PMID:25714049	NM_027504	Prdm16	exonic	398
chr2	49272040	49273021	MACS_peak_104491	163.13	981	chr2:49272041-49279783+	163.13	9.46	11.61	2_49135303_49127561_-7742|19.67|7|10	PMID:25714049	NM_029924	Mbd5	exonic	2432
chr12	89985809	89986036	MACS_peak_48553	157.85	227	chr12:89976347-89989289+	157.85	8.47	7.9	12_91227729_91214787_-12942|21.06|2|2	PMID:25714049	NM_172544	Nrxn3	sense overlapping	12943
chr3	148851894	148851998	MACS_peak_125420	155.14	104	chr3:148846849-148859533-	155.14	8.51	11.9	3_148522497_148509813_-12684|13.09|10|13	PMID:25714049	NM_001081298	Adgrl2	exonic	1608
chr12	103021746	103021876	MACS_peak_49778	148.07	130	chr12:102991350-103021876+	148.07	11.06	7.94	mmu_circ_0000411	circBase	NM_001081017	Unc79	exonic	876
chr11	86279592	86279735	MACS_peak_32678	146.81	143	chr11:86278764-86279735-	146.81	5.36	18.76	NA	novel	NM_001080931	Med13	exonic	302
chr8	127460273	127460384	MACS_peak_188607	143.06	111	chr8:127376744-127474615+	143.06	7.7	12.34	8_129998515_129900644_-97871|22.26|2|2	PMID:25714049	NM_033620	Pard3	exonic	2011
chr5	30792292	30793134	MACS_peak_144527	142.08	842	chr5:30792293-30793978+	142.08	4.84	19.04	NA	novel	NM_023047	Dpysl5	sense overlapping	1686
chr8	40507454	40507648	MACS_peak_199642	138.69	194	chr8:40499295-40510226-	138.69	5.93	8.04	8_41595580_41584649_-10931|18.61|4|4	PMID:25714049	NM_011135	Cnot7	exonic	713
chr5	34349678	34350263	MACS_peak_145055	136.99	585	chr5:34342522-34351358+	136.99	5.02	19.01	NA	novel	NM_011278	Rnf4	sense overlapping	8837
chr7	37961290	37961874	MACS_peak_170994	136.99	584	chr7:37959255-37969697-	136.99	5.63	19.01	7_38754716_38744274_-10442|17.80|5|6	PMID:25714049	NM_011274	Uri1	sense overlapping	10443
chr5	20997782	20998756	MACS_peak_140762	135.22	974	chr5:20997783-21005415-	135.22	6.9	12.82	NA	novel	NM_011203	Ptpn12	exonic	1301
chr2	156745834	156746196	MACS_peak_115204	134.52	362	chr2:156745835-156748102+	134.52	4.93	19.25	NA	novel	NM_001277186	Dlgap4	exonic	442
chr4	151043836	151043987	MACS_peak_138726	133.94	151	chr4:151043837-151043987-	133.94	6.25	12.94	NA	novel	ENSMUST00000103204	Per3	intronic	151
chr4	57709450	57710143	MACS_peak_143472	131.64	693	chr4:57709451-57710143+	131.64	5.39	8.12	mmu_circ_0001212	circBase	ENSMUST00000126465	Gm20459	exonic	693
chr13	100137322	100137572	MACS_peak_58754	130.07	250	chr13:100126587-100137572+	130.07	6.41	8.19	13_100907527_100896542_-10985|13.72|2|2	PMID:25714049	NM_011420	Smn1	sense overlapping	10986
chr11	98694137	98694293	MACS_peak_37197	128.13	156	chr11:98693383-98694293+	128.13	3.25	8.25	11_98555607_98554697_-910|17.53|2|3	PMID:25714049	NM_009439	Psmd3	exonic	495
chr10	63002182	63002280	MACS_peak_20778	127.84	98	chr10:62997881-63004776+	127.84	8.41	8.27	NA	novel	NM_027425	Rufy2	exonic	605
chr1	63535134	63535192	MACS_peak_4089	122.02	58	chr1:63534286-63551860+	122.02	4.66	13.37	NA	novel	NM_011780	Adam23	exonic	774
chr1	168209350	168209595	MACS_peak_12995	120.4	245	chr1:168183530-168209595-	120.4	4.25	8.39	1_170139726_170113661_-26065|16.31|2|2	PMID:25714049	NM_008783	Pbx1	exonic	822
chr12	82357232	82357363	MACS_peak_47247	118.5	131	chr12:82357233-82372542+	118.5	5.81	8.49	12_83473529_83458220_-15309|11.72|19|87	PMID:25714049	NM_172579	Sipa1l1	exonic	495
chr1	84814822	84814969	MACS_peak_6052	118.38	147	chr1:84782827-84814969-	118.38	4.05	20.15	1_84811544_84779402_-32142|18.03|13|23	PMID:25714049	NM_133975	Trip12	exonic	1193
chr4	84996486	84996580	MACS_peak_145060	115.05	94	chr4:84956276-85006524+	115.05	8.47	8.35	4_84652428_84602180_-50248|17.27|8|10	PMID:25714049	NM_175275	Cntln	exonic	1331
chr14	87485362	87485871	MACS_peak_61838	113.07	509	chr14:87471871-87487287+	113.07	5.46	20.27	NA	novel	NM_172605	Tdrd3	sense overlapping	15417
chr5	103561931	103562146	MACS_peak_147258	111.76	215	chr5:103559137-103582776+	111.76	5.8	13.85	NA	novel	NM_011204	Ptpn13	exonic	2092
chr10	7701609	7703120	MACS_peak_14591	110.01	1511	chr10:7697502-7703120+	110.01	2.6	20.67	NA	novel	NM_010690	Lats1	exonic	1659
chr5	32826957	32827334	MACS_peak_142376	109.59	377	chr5:32819866-32835688-	109.59	5.37	14.08	mmu_circ_0001333	circBase	NM_194340	Prr14l	exonic	5072
chr5	100485139	100485855	MACS_peak_162209	106.04	716	chr5:100475689-100485855-	106.04	7.34	8.45	mmu_circ_0001368	circBase	NM_172714	Lin54	exonic	983
chrX	59067328	59067599	MACS_peak_222848	105.47	271	chrX:59063487-59067599-	105.47	4.39	8.46	NA	novel	NM_010200	Fgf13	sense overlapping	4113
chrX	152622948	152623335	MACS_peak_205464	101.73	387	chrX:152612383-152623335-	101.73	4.04	14.48	X_149057878_149046926_-10952|15.88|4|4	PMID:25714049	NM_172441	Shroom2	sense overlapping	10953
chr14	63123166	63123227	MACS_peak_58972	101.56	61	chr14:63123167-63123553+	101.56	5.99	14.52	NA	novel	ENSMUST00000006235	Ctsb	intronic	387
chr2	146870765	146870846	MACS_peak_123814	98.13	81	chr2:146870766-146891284+	98.13	5.52	8.68	2_146717020_146696502_-20518|11.74|4|7	PMID:25714049	NM_001033298	Kiz	exonic	1031
chr4	102909737	102909789	MACS_peak_146559	94.97	52	chr4:102908808-102934605+	94.97	6.65	8.86	NA	novel	NM_001285852	Sgip1	exonic	1141
chr2	73845438	73845553	MACS_peak_108373	94.9	115	chr2:73842360-73853891-	94.9	7.63	21.99	2_73691948_73680417_-11531|16.42|21|66	PMID:25714049	NM_001025093	Atf2	exonic	726
chr18	31827261	31827488	MACS_peak_89129	94.61	227	chr18:31827262-31835481+	94.61	9.12	14.95	mmu_circ_0000858	circBase	NM_028866	Wdr33	exonic	747
chr3	89007141	89007877	MACS_peak_133941	94.31	736	chr3:89001773-89007877+	94.31	3.07	8.9	mmu_circ_0001148	circBase	NM_138679	Ash1l	exonic	838
chr5	142868701	142868874	MACS_peak_155591	93.38	173	chr5:142868702-142868874-	93.38	14	21.77	NA	novel	ENSMUST00000110766	Fbxl18	sense overlapping	173
chr2	119931710	119931934	MACS_peak_120989	89.65	224	chr2:119916431-119931934+	89.65	6.56	9.05	2_119757670_119742167_-15503|16.33|5|6	PMID:25714049	NM_013720	Mga	exonic	2581
chr6	135732513	135734063	MACS_peak_180996	88.09	1550	chr6:135732514-135741082-	88.09	4.12	9.13	6_135691100_135682532_-8568|19.40|13|28	PMID:25714049	NM_008171	Grin2b	sense overlapping	8569
chr18	65622983	65625334	MACS_peak_102283	82.43	2351	chr18:65622984-65625334+	82.43	3.9	9.3	mmu_circ_0000883	circBase	NM_207255	Zfp532	exonic	2351
chr6	119920806	119921028	MACS_peak_179766	80.18	222	chr6:119920110-119921028+	80.18	4.07	9.52	mmu_circ_0001516	circBase	NM_011236	Rad52	exonic	303
chr13	35815908	35816575	MACS_peak_49058	78.59	667	chr13:35790101-35816575+	78.59	3.48	23.39	13_35908444_35881970_-26474|12.74|11|36	PMID:25714049	NM_009881	Cdyl	exonic	742
chr4	141485558	141485672	MACS_peak_152028	78.47	114	chr4:141483725-141494398-	78.47	5.56	9.67	mmu_circ_0001291	circBase	NM_019763	Spen	exonic	969
chr5	112428470	112428877	MACS_peak_163674	75.89	407	chr5:112428471-112428877-	75.89	7.37	9.63	NA	novel	NM_001253917	Sez6l	intronic	407
chr5	103885994	103886290	MACS_peak_162626	73.19	296	chr5:103885907-103886290-	73.19	6.34	9.88	5_104315309_104314926_-383|16.59|21|98	PMID:25714049	NM_178741	Klhl8	exonic	384
chr15	27844809	27844924	MACS_peak_71188	72.81	115	chr15:27844810-27846859-	72.81	5.03	9.92	NA	novel	NM_001081302	Trio	exonic	265
chr1	44157873	44159003	MACS_peak_3085	70.92	1130	chr1:44156937-44167882-	70.92	5.49	10.11	NA	novel	NM_011729	Ercc5	antisense	10946
chr5	113550958	113551334	MACS_peak_148538	70.42	376	chr5:113550423-113558463+	70.42	4.84	17	5_114008280_114000241_-8039|13.54|14|125	PMID:25714049	ENSMUST00000094452	Wscd2	exonic	1027
chr18	53918798	53919033	MACS_peak_101220	70.25	235	chr18:53895531-53919033+	70.25	4.45	10.21	mmu_circ_0000873	circBase	NM_152809	Csnk1g3	exonic	919
chr2	126812534	126813410	MACS_peak_121868	69.15	876	chr2:126810165-126813410-	69.15	5.47	10.07	NA	novel	NM_021450	Trpm7	sense overlapping	3246
chr1	187341486	187341947	MACS_peak_13578	67.28	461	chr1:187341487-187348504+	67.28	6.82	24.73	NA	novel	NM_026367	Gpatch2	sense overlapping	7018
chr3	90341655	90341994	MACS_peak_134227	62.98	339	chr3:90341656-90341994+	62.98	3.6	10.92	3_90145916_90145578_-338|18.85|18|54	PMID:25714049	uc008qca.1	Gatad2b	exonic	339
chr10	22711355	22712091	MACS_peak_15849	58.27	736	chr10:22705693-22712091-	58.27	6.05	26.47	mmu_circ_0000151	circBase	NM_011603	Tbpl1	sense overlapping	6399
chr7	126152825	126153279	MACS_peak_179035	58.24	454	chr7:126120357-126153279-	58.24	4	26.5	NA	novel	NM_028816	Xpo6	exonic	1213
chr4	86836379	86836562	MACS_peak_133873	55.37	183	chr4:86836380-86837576+	55.37	6.08	26.52	NA	novel	NM_184088	Dennd4c	exonic	379
chr19	44941458	44943714	MACS_peak_108741	55.16	2256	chr19:44941459-44949139-	55.16	6.01	11.53	NA	novel	NM_001081225	Fam178a	antisense	7681
chr16	9663438	9663607	MACS_peak_79691	51.66	169	chr16:9653396-9669910-	51.66	5.29	12.22	16_9670003_9653489_-16514|20.16|6|8	PMID:25714049	NM_008170	Grin2a	exonic	885
chrX	134977646	134977747	MACS_peak_204580	51.44	101	chrX:134972347-134977747-	51.44	4.36	19.91	X_131512286_131506886_-5400|17.37|3|3	PMID:25714049	NM_175446	Zmat1	sense overlapping	5401
chr5	23523796	23524888	MACS_peak_155857	3141.57	1092	chr5:23434234-23528062-	3141.57	22.9	0	NA	novel	NM_009274	Srpk2	sense overlapping	93829
chr1	39986624	39986800	MACS_peak_2740	3100	176	chr1:39962178-39990299+	3100	19.13	9.74	1_40047144_40019023_-28121|14.68|2|2	PMID:25714049	NM_008696	Map4k4	exonic	1110
chr12	4634534	4634797	MACS_peak_41275	3100	263	chr12:4613243-4673607+	3100	32.12	9.74	12_4680413_4620049_-60364|18.31|7|8	PMID:25714049	NM_011365	Itsn2	exonic	3492
chr13	23285242	23285858	MACS_peak_52898	3100	616	chr13:23276284-23316747-	3100	493.39	9.74	NA	novel	NR_126443	4930557F10Rik	sense overlapping	40464
chr1	87403666	87403846	MACS_peak_6851	2973.2	180	chr1:87364104-87403846+	2973.2	25.29	9.65	1_89300421_89260679_-39742|21.11|6|7	PMID:25714049	NM_146112	Gigyf2	exonic	674
chr6	52944857	52945973	MACS_peak_173940	1954.9	1116	chr6:52944858-52945973-	1954.9	20.75	7.76	NA	novel	ENSMUST00000074541	Jazf1	intronic	1116
chr10	79864896	79865714	MACS_peak_22413	1882.32	818	chr10:79864897-79865714-	1882.32	19.21	7.51	NA	novel	NR_038088	Bc1	intronic	818
chr9	66545556	66546006	MACS_peak_215114	1619.59	450	chr9:66514219-66566903-	1619.59	32.12	6.74	NA	novel	NM_144937	Usp3	sense overlapping	52685
chr2	131511983	131514202	MACS_peak_112749	1341.84	2219	chr2:131511984-131555847+	1341.84	16.65	6.48	NA	novel	NM_145533	Smox	sense overlapping	43864
chr7	73507805	73507913	MACS_peak_188262	1251.87	108	chr7:73490479-73519708-	1251.87	31.56	6.28	7_80664594_80635365_-29229|12.39|10|21	PMID:25714049	NM_001081345	Chd2	exonic	1938
chr6	77957010	77957686	MACS_peak_175681	1141.95	676	chr6:77957011-77957686-	1141.95	22.61	5.98	NA	novel	ENSMUST00000075340	Ctnna2	intronic	676
chr19	8712537	8713692	MACS_peak_105616	1051.17	1155	chr19:8707750-8713692-	1051.17	13.08	5.89	NA	novel	NM_008577	Slc3a2	sense overlapping	5943
chr1	133009136	133009188	MACS_peak_8830	752.35	52	chr1:132994503-133012714-	752.35	18.03	5.78	NA	novel	NR_126506	Mdm4	exonic	757
chr9	29483886	29485540	MACS_peak_190789	730.84	1654	chr9:29462274-29502944-	730.84	9.2	5.85	NA	novel	ENSMUST00000075069	Ntm	intronic	40671
chr3	127093538	127094928	MACS_peak_126098	706.74	1390	chr3:127093539-127094928-	706.74	18.61	7.84	NA	novel	ENSMUST00000182008	Ank2	intronic	1390
chr16	8716514	8716619	MACS_peak_79645	659.49	105	chr16:8707638-8716619-	659.49	19.54	5.64	16_8716712_8707731_-8981|18.38|1|2	PMID:25714049	NM_001003918	Usp7	exonic	641
chr1	38536627	38537139	MACS_peak_2548	597.51	512	chr1:38497062-38539001-	597.51	8.34	8.29	NA	novel	NM_001290814	Aff3	sense overlapping	41940
chr13	14316860	14317099	MACS_peak_52368	525.22	239	chr13:14316861-14317099-	525.22	7.97	5.53	NA	novel	NM_001081348	Hecw1	sense overlapping	239
chr7	115642897	115643203	MACS_peak_177966	499.4	306	chr7:115642898-115643203-	499.4	9.85	8.89	NA	novel	ENSMUST00000072804	Sox6	intronic	306
chr3	122557433	122558230	MACS_peak_136760	496.97	797	chr3:122539889-122570944-	496.97	9.3	5.55	NA	novel	NM_153118	Fnbp1l	sense overlapping	31056
chr7	84370249	84370957	MACS_peak_189477	482.42	708	chr7:84343742-84372647-	482.42	10.8	5.66	NA	novel	NM_007488	Arnt2	sense overlapping	28906
chr5	25313979	25315822	MACS_peak_141440	481	1843	chr5:25298870-25329575-	481	5.41	7.17	mmu_circ_0012469	circBase	NM_001081383	Kmt2c	exonic	7091
chr13	49061425	49061710	MACS_peak_49438	417.4	285	chr13:49061426-49067304-	417.4	8.76	7.31	NA	novel	NM_029361	Wnk2	sense overlapping	5879
chr8	88346873	88347058	MACS_peak_184771	405.88	185	chr8:88345149-88347058-	405.88	12.51	7.34	NA	novel	NM_012047	Brd7	exonic	385
chr4	132251674	132251832	MACS_peak_138521	400.29	158	chr4:132237111-132251832-	400.29	13.62	10.27	NA	novel	NM_020273	Gmeb1	exonic	470
chr17	46833692	46834164	MACS_peak_85148	380.31	472	chr17:46809568-46858698-	380.31	18.09	10.45	NA	novel	NM_001100452	Gltscr1l	sense overlapping	49131
chr19	45640321	45640521	MACS_peak_108861	372.2	200	chr19:45591729-45640521+	372.2	21.17	6.02	NA	novel	NM_013907	Fbxw4	antisense	48793
chr18	25060325	25060366	MACS_peak_90569	363.7	41	chr18:25028065-25060376+	363.7	8.05	10.8	18_25218877_25186566_-32311|15.13|4|5	PMID:25714049	NM_175276	Fhod3	exonic	291
chr4	63495399	63495612	MACS_peak_143997	348.31	213	chr4:63495400-63495612+	348.31	13.28	6.25	NA	novel	NM_028640	Whrn	antisense	213
chr15	82292833	82293140	MACS_peak_69688	344.64	307	chr15:82292834-82293140+	344.64	4.75	11.05	NA	novel	uc007wys.1	2022-09-03	intronic	307
chr6	37244208	37244673	MACS_peak_159210	334.31	465	chr6:37231117-37295799-	334.31	17.52	11.22	NA	novel	ENSMUST00000042075	Dgki	intronic	64683
chr4	124715852	124716108	MACS_peak_137288	328.85	256	chr4:124715853-124718360+	328.85	9.11	11.37	NA	novel	NM_029157	Sf3a3	sense overlapping	2508
chr15	101197465	101198277	MACS_peak_71971	307.55	812	chr15:101193932-101211402+	307.55	15	11.85	15_101041833_101024363_-17470|16.51|2|2	PMID:25714049	NM_007395	Acvr1b	sense overlapping	17471
chr11	23614080	23614272	MACS_peak_28846	303.92	192	chr11:23614081-23614272-	303.92	13.81	6.58	NA	novel	ENSMUST00000043356	0610010F05Rik	intronic	192
chr9	71717395	71717485	MACS_peak_215853	298.84	90	chr9:71705148-71717497-	298.84	14.21	6.75	9_71565304_71552955_-12349|16.32|4|4	PMID:25714049	NM_026599	Cgnl1	exonic	600
chr3	51323221	51323451	MACS_peak_118539	291.57	230	chr3:51299783-51326035-	291.57	7.87	8.93	mmu_circ_0001123	circBase	uc008pdt.1	Elf2	exonic	587
chr11	76748548	76748582	MACS_peak_34275	290.54	34	chr11:76748508-76754800-	290.54	22.23	6.72	11_76568302_76562010_-6292|15.57|14|29	PMID:25714049	NM_016810	Gosr1	exonic	363
chr18	39120118	39120223	MACS_peak_100118	274.51	105	chr18:39097630-39150118+	274.51	16.4	6.8	18_39309772_39257284_-52488|17.67|9|18	PMID:25714049	NM_175164	Arhgap26	exonic	953
chr18	76290375	76290893	MACS_peak_93399	271.44	518	chr18:76262440-76304776+	271.44	19.79	9.13	18_76464430_76422094_-42336|13.15|13|19	PMID:25714049	NM_010754	Smad2	sense overlapping	42337
chr9	31325626	31325915	MACS_peak_191028	270.41	289	chr9:31325627-31337422+	270.41	8.04	9.21	NA	novel	NM_001080817	Prdm10	sense overlapping	11796
chr17	35689666	35689913	MACS_peak_84452	260.1	247	chr17:35688539-35690180-	260.1	9.69	13.3	17_35827125_35825484_-1641|19.36|2|2	PMID:25714049	NM_007584	Ddr1	exonic	670
chr5	27765586	27766466	MACS_peak_156548	256.71	880	chr5:27744083-27775679-	256.71	4.95	6.87	5_28102219_28070623_-31596|21.38|2|2	PMID:25714049	NM_018878	Paxip1	sense overlapping	31597
chr16	11202317	11202457	MACS_peak_79901	234.47	140	chr16:11194460-11202457-	234.47	8.71	7.19	NA	novel	NM_025546	Rsl1d1	exonic	996
chr8	124860945	124861271	MACS_peak_188262	218.23	326	chr8:124841294-124861271-	218.23	5.27	10.22	NA	novel	NM_025615	2810004N23Rik	exonic	566
chr10	103215525	103216112	MACS_peak_22049	217.97	587	chr10:103170421-103221459-	217.97	7.17	10.21	NA	novel	NM_001163559	Lrriq1	exonic	3364
chr9	71883106	71883251	MACS_peak_195814	189.83	145	chr9:71882717-71885288-	189.83	5.9	10.7	NA	novel	NM_011544	Tcf12	exonic	456
chr10	59178760	59178854	MACS_peak_20217	179.95	94	chr10:59166504-59192815-	179.95	7.26	7.77	10_58655563_58629252_-26311|18.21|7|25	PMID:25714049	NM_001024910	2022-09-10	exonic	1250
chr4	103066284	103066486	MACS_peak_135087	151.12	202	chr4:103048210-103072843-	151.12	10.51	18.41	4_102745448_102720815_-24633|14.88|13|18	PMID:25714049	NM_146254	Wdr78	exonic	1424
chr2	52111892	52112554	MACS_peak_115760	148.68	662	chr2:52109351-52113000+	148.68	5.28	7.94	NA	novel	NM_175238	Rif1	exonic	3142
chr1	191749539	191749555	MACS_peak_15460	146.2	16	chr1:191749540-191763671+	146.2	6.56	7.98	mmu_circ_0000135	circBase	NM_172266	Lpgat1	exonic	616
chr18	44491123	44491330	MACS_peak_92520	132.11	207	chr18:44491124-44519659-	132.11	6.43	19.49	18_44679313_44650778_-28535|16.95|3|3	PMID:25714049	NM_001085373	Mcc	exonic	657
chr1	119755528	119756752	MACS_peak_8032	121.84	1224	chr1:119741355-119773269-	121.84	8.94	19.79	NA	novel	NM_019933	Ptpn4	sense overlapping	31915
chr1	87985901	87986199	MACS_peak_6927	121.27	298	chr1:87975808-87990157-	121.27	9.94	8.35	NA	novel	NM_001033291	Usp40	exonic	1359
chr2	59795794	59796026	MACS_peak_105208	119.48	232	chr2:59785324-59800178+	119.48	6.89	13.55	NA	novel	NM_198294	Tanc1	exonic	1828
chr9	54595165	54595260	MACS_peak_193503	118.65	95	chr9:54595166-54596189+	118.65	2.55	13.61	9_54443996_54442973_-1023|16.34|10|23	PMID:25714049	NM_029573	Idh3a	exonic	303
chr2	45020858	45022123	MACS_peak_106196	109.27	1265	chr2:45017397-45022911-	109.27	7.71	20.72	NA	novel	NM_015753	Zeb2	sense overlapping	5515
chr11	93923808	93923879	MACS_peak_36477	107.39	71	chr11:93905159-93924659+	107.39	5.42	8.68	11_93785973_93766473_-19500|13.31|5|5	PMID:25714049	NM_134012	Mbtd1	exonic	1118
chr13	29459069	29459285	MACS_peak_53301	106.99	216	chr13:29444008-29478708-	106.99	6.35	8.39	NA	novel	NM_144536	Cdkal1	sense overlapping	34701
chr1	192980345	192980561	MACS_peak_14038	101.05	216	chr1:192980346-192986882-	101.05	7.93	21.4	1_194813076_194806540_-6536|18.52|18|155	PMID:25714049	NM_181546	Syt14	exonic	381
chr16	56165832	56166012	MACS_peak_77840	94.97	180	chr16:56153375-56166012+	94.97	7.87	21.97	NA	novel	NM_025483	Senp7	exonic	847
chr15	103519948	103520062	MACS_peak_78791	88.07	114	chr15:103519949-103525337+	88.07	5.23	9.13	NA	novel	NM_008800	Pde1b	exonic	951
chr3	87859957	87861014	MACS_peak_133683	85.35	1057	chr3:87858753-87867410-	85.35	5.59	9.35	NA	novel	NM_033573	Prcc	sense overlapping	8658
chr5	112215488	112215651	MACS_peak_163627	81.36	163	chr5:112215489-112215651-	81.36	26.03	9.38	NA	novel	NR_003718	Miat	sense overlapping	163
chr2	69781944	69782118	MACS_peak_107915	65.43	174	chr2:69761722-69782118-	65.43	5.43	25.16	2_69620175_69599779_-20396|19.75|4|7	PMID:25714049	NM_001077684	Ccdc173	exonic	1023
chr2	104697509	104697730	MACS_peak_110370	63.41	221	chr2:104697510-104699974-	63.41	4.97	25.72	2_104540131_104537667_-2464|19.42|11|20	PMID:25714049	NM_177190	Tcp11l1	exonic	475
chr8	110738618	110739263	MACS_peak_205609	3207.32	645	chr8:110738619-110739263+	3207.32	7.4	0	NA	novel	NM_198625	Mtss1l	sense overlapping	645
chr7	6710713	6710890	MACS_peak_182697	3184.6	177	chr7:6710714-6710890-	3184.6	16.16	0	NA	novel	NM_008817	Peg3	sense overlapping	177
chr15	98762634	98762825	MACS_peak_70145	3135.26	191	chr15:98762635-98762825+	3135.26	24.4	13.33	NA	novel	NM_007478	Arf3	antisense	191
chr11	94333987	94334527	MACS_peak_36546	3120.93	540	chr11:94333988-94334527+	3120.93	26.64	3.7	NA	novel	NM_027799	Ankrd40	sense overlapping	540
chr1	24613305	24614294	MACS_peak_1437	3100	989	chr1:24613306-24614294-	3100	5.63	9.74	NA	novel	uc007ams.1	Atpase6	sense overlapping	989
chr1	30805553	30805850	MACS_peak_1724	3100	297	chr1:30805554-30805850-	3100	48.01	9.74	NA	novel	NM_001081080	Phf3	sense overlapping	297
chr1	136276537	136276758	MACS_peak_10580	3100	221	chr1:136273750-136282881-	3100	19.94	9.74	1_138179458_138170327_-9131|16.10|7|11	PMID:25714049	NM_001081360	Camsap2	exonic	2811
chr10	80300332	80300439	MACS_peak_22525	3100	107	chr10:80300289-80300439+	3100	32.79	9.74	NA	novel	ENSMUST00000105359	Apc2	intronic	151
chr11	58041477	58041652	MACS_peak_31847	3100	175	chr11:58040391-58044050+	3100	15.4	9.74	11_57857552_57853893_-3659|21.21|6|10	PMID:25714049	NM_028451	Larp1	exonic	947
chr13	55475000	55478248	MACS_peak_55602	3100	3248	chr13:55475001-55481660-	3100	26.71	9.74	NA	novel	NM_019813	Dbn1	sense overlapping	6660
chr13	99433768	99435547	MACS_peak_58653	3100	1779	chr13:99433769-99435547-	3100	11.09	9.74	NA	novel	NM_008634	Map1b	sense overlapping	1779
chr14	54642756	54644171	MACS_peak_64699	3100	1415	chr14:54642757-54644171-	3100	18.68	9.74	NA	novel	NM_019567	Acin1	sense overlapping	1415
chr15	25364138	25364759	MACS_peak_70869	3100	621	chr15:25364139-25364759-	3100	31.11	9.74	NA	novel	NM_027395	Basp1	sense overlapping	621
chr15	25780973	25781864	MACS_peak_70919	3100	891	chr15:25778081-25793246+	3100	17.13	9.74	NA	novel	NM_019472	Myo10	exonic	1739
chr16	20651761	20652924	MACS_peak_81149	3100	1163	chr16:20651762-20662659+	3100	53.96	9.74	NA	novel	NM_134101	Psmd2	sense overlapping	10898
chr17	27581788	27582041	MACS_peak_90479	3100	253	chr17:27580914-27582041-	3100	14.38	9.74	NA	novel	NM_019837	Nudt3	sense overlapping	1128
chr17	33652272	33652326	MACS_peak_91528	3100	54	chr17:33649595-33665645-	3100	56.97	9.74	NA	novel	NM_029804	Hnrnpm	exonic	1347
chr17	35156322	35157978	MACS_peak_91751	3100	1656	chr17:35156323-35157978-	3100	11.22	9.74	NA	novel	NM_020027	Prrc2a	sense overlapping	1656
chr2	5957470	5957850	MACS_peak_111062	3100	380	chr2:5957471-5988472+	3100	25.89	9.74	2_5909518_5878517_-31001|18.87|7|11	PMID:25714049	NM_001081132	Upf2	exonic	1856
chr2	85061887	85064016	MACS_peak_118455	3100	2129	chr2:85058126-85072168+	3100	14.17	9.74	NA	novel	NM_001081260	Tnks1bp1	exonic	4380
chr2	121305037	121305667	MACS_peak_121272	3100	630	chr2:121305038-121305667+	3100	22.05	9.74	NA	novel	ENSMUST00000133283	Map1a	intronic	630
chr3	87975836	87977936	MACS_peak_133709	3100	2100	chr3:87975837-87977936+	3100	11.38	9.74	NA	novel	NM_016701	Nes	sense overlapping	2100
chr4	116069722	116070244	MACS_peak_147845	3100	522	chr4:116066976-116075024-	3100	13.95	9.74	NA	novel	NM_025641	Uqcrh	sense overlapping	8049
chr6	30805349	30805695	MACS_peak_171621	3100	346	chr6:30805350-30805695+	3100	14.17	9.74	NA	novel	uc009bfw.1	Mit1/Lb9	sense overlapping	346
chr6	124746487	124746834	MACS_peak_180175	3100	347	chr6:124746488-124746834-	3100	11.75	9.74	NA	novel	NM_007881	Atn1	sense overlapping	347
chr6	124913792	124917775	MACS_peak_180205	3100	3983	chr6:124913793-124917775-	3100	23.26	9.74	NA	novel	NM_026988	Ptms	sense overlapping	3983
chr7	12774112	12775622	MACS_peak_182840	3100	1510	chr7:12770804-12775658-	3100	44.99	9.74	7_13361007_13356153_-4854|23.20|13|51	PMID:25714049	NM_001017955	Zscan18	exonic	1972
chr7	28338351	28338744	MACS_peak_184260	3100	393	chr7:28338352-28338744-	3100	25.18	9.74	NA	novel	NM_013676	Supt5	sense overlapping	393
chr8	22938420	22938717	MACS_peak_198399	3100	297	chr8:22938421-22938717+	3100	30.5	9.74	NA	novel	NM_001081149	Kat6a	sense overlapping	297
chr2	152396388	152396564	MACS_peak_114490	3100	176	chr2:152396389-152396564+	3100	17.93	7.3	NA	novel	NM_011438	Sox12	antisense	176
chr3	10015074	10016111	MACS_peak_118466	3100	1037	chr3:10015075-10016111+	3100	8.74	7.3	NA	novel	NM_010634	Fabp5	sense overlapping	1037
chr6	118404579	118405340	MACS_peak_165585	3100	761	chr6:118404256-118413919-	3100	20.58	7.3	NA	novel	NM_194339	Bms1	exonic	1651
chr9	21424426	21425256	MACS_peak_193346	3100	830	chr9:21387700-21425256+	3100	35.94	7.3	NA	novel	NM_007871	Dnm2	sense overlapping	37557
chrX	105851036	105851270	MACS_peak_207805	3100	234	chrX:105820776-105851270-	3100	14.89	7.3	NA	novel	NM_009530	Atrx	exonic	1997
chr2	32630951	32631391	MACS_peak_114025	3004.71	440	chr2:32628369-32634096+	3004.71	13.93	9.5	NA	novel	NM_021515	Ak1	sense overlapping	5728
chr17	13887981	13888977	MACS_peak_89155	2932.22	996	chr17:13887982-13896222+	2932.22	13.22	9.61	NA	novel	NM_010806	Mllt4	exonic	1131
chr9	114705053	114705170	MACS_peak_219769	2837.12	117	chr9:114705054-114709314+	2837.12	17.05	9.35	9_114618432_114614172_-4260|13.88|13|37	PMID:25714049	NM_146229	Dync1li1	exonic	518
chr19	23892734	23894020	MACS_peak_96224	2690.74	1286	chr19:23892735-23894020+	2690.74	11.42	7.87	19_23968510_23967225_-1285|20.06|6|8	PMID:25714049	NM_177034	Apba1	exonic	1286
chr7	122970139	122970561	MACS_peak_175409	2615.26	422	chr7:122970140-122970561+	2615.26	26.46	7.78	NA	novel	ENSMUST00000148880	Rbbp6	intronic	422
chr12	76327565	76330360	MACS_peak_46383	2422.84	2795	chr12:76327566-76330488+	2422.84	17.1	9.06	12_77431475_77428553_-2922|21.49|5|7	PMID:25714049	NM_001101471	Akap5	sense overlapping	2923
chr2	20871609	20871768	MACS_peak_112273	2346.56	159	chr2:20863080-20871768-	2346.56	21.11	9.03	NA	novel	NM_001081364	Arhgap21	exonic	710
chr5	34465374	34466643	MACS_peak_157462	2293.83	1269	chr5:34420001-34485848+	2293.83	15.54	8.78	NA	novel	NM_001243123	Fam193a	sense overlapping	65848
chr18	32079326	32079931	MACS_peak_91034	2284.59	605	chr18:32070107-32079931+	2284.59	17.72	6.54	NA	novel	NM_173441	Iws1	sense overlapping	9825
chr7	45048846	45049769	MACS_peak_168306	2228.12	923	chr7:45048847-45049769-	2228.12	9.5	7.05	NA	novel	NM_175022	Prr12	sense overlapping	923
chr5	143264292	143264681	MACS_peak_153042	2174.6	389	chr5:143264051-143265133-	2174.6	18.71	6.95	NA	novel	NM_017467	Zfp316	exonic	609
chr3	34648975	34653284	MACS_peak_117992	2169.35	4309	chr3:34638358-34653284-	2169.35	8.82	6.92	NA	novel	NM_011443	Sox2	antisense	14927
chr7	73417526	73417821	MACS_peak_188229	2137.48	295	chr7:73417527-73417821+	2137.48	14.9	8.37	NA	novel	NM_177740	Rgma	sense overlapping	295
chr6	18433819	18435446	MACS_peak_170700	2132.43	1627	chr6:18397333-18435446-	2132.43	14	8.35	NA	novel	NM_080285	Cttnbp2	exonic	3091
chr14	52176251	52177415	MACS_peak_64557	2042.53	1164	chr14:52161670-52181108-	2042.53	8.14	8.07	NA	novel	NM_033618	Supt16	sense overlapping	19439
chr17	56393717	56394106	MACS_peak_85944	2035.54	389	chr17:56352976-56394106+	2035.54	21.59	6.34	NA	novel	NM_172132	Kdm4b	exonic	1635
chr8	84565947	84566393	MACS_peak_203295	1981.31	446	chr8:84556704-84580223+	1981.31	16.27	7.89	8_87104122_87080603_-23519|14.39|5|5	PMID:25714049	NM_007578	Cacna1a	exonic	1925
chr18	47248847	47249072	MACS_peak_90888	1972.39	225	chr18:47248848-47249072-	1972.39	8.26	6.59	NA	novel	ENSMUST00000123228	Sema6a	intronic	225
chr5	142787133	142788759	MACS_peak_152959	1880.47	1626	chr5:142787134-142790189-	1880.47	9.84	6.53	NA	novel	NM_178242	Tnrc18	exonic	1752
chr11	95748999	95749607	MACS_peak_36743	1851.59	608	chr11:95749000-95764327+	1851.59	9.42	7.49	11_95625641_95610314_-15327|19.43|4|4	PMID:25714049	ENSMUST00000148945	Zfp652	exonic	1806
chr16	72904629	72904787	MACS_peak_85617	1849.59	158	chr16:72904630-72935786+	1849.59	28.02	7.55	16_72936031_72904875_-31156|14.91|7|16	PMID:25714049	NM_019413	Robo1	exonic	546
chr15	98805043	98805224	MACS_peak_70146	1793.92	181	chr15:98805044-98805224-	1793.92	12.31	6.26	NA	novel	NM_001013741	Ddn	sense overlapping	181
chr15	98863940	98864125	MACS_peak_70158	1756.08	185	chr15:98863941-98864125-	1756.08	10.56	6.26	NA	novel	NM_001033276	Kmt2d	sense overlapping	185
chr17	32221145	32221508	MACS_peak_83991	1713.72	363	chr17:32214631-32225713-	1713.72	8.84	6.22	NA	novel	NM_020508	Brd4	exonic	1269
chr6	112804512	112804779	MACS_peak_164851	1683.08	267	chr6:112804513-112804779-	1683.08	22.27	6.36	NA	novel	ENSMUST00000060215	Srgap3	intronic	267
chr10	29146563	29147753	MACS_peak_17958	1642.43	1190	chr10:29146564-29150402+	1642.43	8.77	6.84	10_28870208_28866370_-3838|13.74|8|10	PMID:25714049	NM_026138	Soga3	exonic	1574
chr2	155406631	155408167	MACS_peak_124683	1635.2	1536	chr2:155406632-155408167-	1635.2	10.36	6.8	NA	novel	NM_001242558	Ncoa6	intronic	1536
chr7	127530439	127530798	MACS_peak_179254	1604.49	359	chr7:127521476-127534961+	1604.49	10.2	6.3	7_134678475_134664990_-13485|15.44|2|3	PMID:25714049	NM_001304266	Srcap	exonic	2547
chr17	25830768	25831197	MACS_peak_81064	1588.45	429	chr17:25830769-25831197-	1588.45	17.79	5.94	NA	novel	NM_019719	Stub1	sense overlapping	429
chr13	101757325	101758039	MACS_peak_52933	1556.77	714	chr13:101757326-101758039+	1556.77	12.79	5.94	NA	novel	NM_001077495	Pik3r1	antisense	714
chr3	10088670	10088830	MACS_peak_118470	1550.98	160	chr3:10088671-10088830-	1550.98	12.2	6.3	NA	novel	NR_045710	Gm9833	antisense	160
chr9	110547208	110548742	MACS_peak_219357	1546.78	1534	chr9:110545300-110574274+	1546.78	17.91	6.46	NA	novel	NM_001081340	Setd2	exonic	5908
chr3	107672090	107672332	MACS_peak_135843	1412.06	242	chr3:107672091-107675053-	1412.06	12.06	6.46	NA	novel	NM_145542	Ahcyl1	sense overlapping	2963
chr10	18523720	18525689	MACS_peak_15027	1408.68	1969	chr10:18514095-18525689+	1408.68	9.21	5.58	NA	novel	NM_173390	Nhsl1	sense overlapping	11595
chr5	135216589	135218294	MACS_peak_167389	1353.13	1705	chr5:135198171-135222096+	1353.13	11.26	6.44	NA	novel	NM_011714	Baz1b	exonic	2511
chr15	57821031	57823751	MACS_peak_73419	1341.09	2720	chr15:57762646-57823751+	1341.09	19.91	6.39	NA	novel	NM_199449	Zhx2	exonic	2794
chr5	124407122	124407377	MACS_peak_165749	1328.44	255	chr5:124373806-124422979-	1328.44	7.78	6.33	NA	novel	NM_001081203	Sbno1	sense overlapping	49174
chr7	30522833	30522992	MACS_peak_170509	1237.23	159	chr7:30522834-30522992+	1237.23	5.65	6.33	NA	novel	NM_178252	Arhgap33	antisense	159
chr3	105717619	105717793	MACS_peak_124849	1236.5	174	chr3:105717620-105717793+	1236.5	18.58	6.32	NA	novel	NM_175398	Fam212b	sense overlapping	174
chr11	69601251	69601826	MACS_peak_29820	1183.49	575	chr11:69601252-69602454-	1183.49	4.77	5.43	NA	novel	NM_013415	Atp1b2	sense overlapping	1203
chr7	64695023	64696017	MACS_peak_187615	1133.21	994	chr7:64695024-64696017+	1133.21	10.19	5.94	7_71840903_71839910_-993|20.05|11|41	PMID:25714049	NM_007461	Apba2	exonic	994
chr8	105618096	105618276	MACS_peak_189166	1093.09	180	chr8:105618097-105618276+	1093.09	11.48	6.6	NA	novel	NM_001081241	Fam65a	sense overlapping	180
chr11	50381510	50382715	MACS_peak_30929	1082.69	1205	chr11:50381511-50382715+	1082.69	15.22	5.91	NA	novel	NM_021510	Hnrnph1	sense overlapping	1205
chr10	67254451	67254583	MACS_peak_20973	1017.56	132	chr10:67245506-67254583+	1017.56	20.88	5.78	10_66717331_66708254_-9077|18.64|7|11	PMID:25714049	NM_207221	Jmjd1c	exonic	703
chr8	72461184	72463492	MACS_peak_202158	982.66	2308	chr8:72461185-72474747-	982.66	8.67	5.66	NA	novel	NM_138585	Cherp	sense overlapping	13563
chr10	80124801	80127299	MACS_peak_20552	969.61	2498	chr10:80124802-80130436+	969.61	14.73	6.84	NA	novel	NM_011492	Stk11	sense overlapping	5635
chr13	34075083	34075725	MACS_peak_48922	946.55	642	chr13:34075084-34128212-	946.55	4.87	6.82	NA	novel	NM_009450	Tubb2a	sense overlapping	53129
chr4	129473774	129474245	MACS_peak_149978	937.84	471	chr4:129468994-129474245+	937.84	16.75	5.57	NA	novel	NM_133889	Bsdc1	exonic	790
chr17	28807003	28807399	MACS_peak_90756	936.68	396	chr17:28805929-28807399+	936.68	19.24	5.57	17_28944344_28942874_-1470|21.90|10|15	PMID:25714049	NM_001081315	Brpf3	exonic	1471
chr7	4706461	4707221	MACS_peak_168522	923.69	760	chr7:4706462-4707221+	923.69	10.8	6.81	NA	novel	NM_001003920	Brsk1	sense overlapping	760
chr1	72874629	72874869	MACS_peak_5608	893.69	240	chr1:72874630-72874869-	893.69	9.4	5.57	NA	novel	NM_010518	Igfbp5	sense overlapping	240
chr7	63938092	63938571	MACS_peak_169972	891.79	479	chr7:63938093-63938571-	891.79	10.37	5.84	NA	novel	NM_021366	Klf13	sense overlapping	479
chr6	39522655	39523759	MACS_peak_172990	880.86	1104	chr6:39522656-39523759-	880.86	9.36	5.64	6_39473758_39472655_-1103|19.93|16|29	PMID:25714049	NM_172477	Dennd2a	exonic	1104
chr17	6121580	6123120	MACS_peak_79309	874.44	1540	chr17:6118296-6139156+	874.44	9.9	5.84	17_6139156_6118296_-20860|16.33|7|10	PMID:25714049	ENSMUST00000142030	Tulp4	intronic	20861
chr4	122871396	122871497	MACS_peak_148750	837.55	101	chr4:122861934-122872456-	837.55	12.46	5.73	NA	novel	NM_007598	Cap1	exonic	1354
chr17	80406690	80406958	MACS_peak_86009	822.68	268	chr17:80399741-80408740-	822.68	10.19	5.87	NA	novel	NM_009231	Sos1	exonic	677
chr7	143535897	143536039	MACS_peak_195832	818.13	142	chr7:143532309-143538316-	818.13	7.27	5.73	mmu_circ_0014012	circBase	NM_008672	Nap1l4	exonic	533
chr9	123828979	123829201	MACS_peak_220924	802.84	222	chr9:123828980-123829201-	802.84	9.98	5.71	NA	novel	NM_148925	Fyco1	sense overlapping	222
chr5	76997422	76997775	MACS_peak_160840	799.43	353	chr5:76997423-77007407+	799.43	6.55	5.72	NA	novel	NM_025691	Srp72	sense overlapping	9985
chr12	5027042	5027180	MACS_peak_41384	769.24	138	chr12:5013803-5034596+	769.24	11.66	5.61	NA	novel	NM_001099628	Atad2b	exonic	1559
chr9	44842532	44842916	MACS_peak_195839	765.65	384	chr9:44840971-44850054-	765.65	7.7	7.57	NA	novel	NM_001081049	Kmt2a	exonic	3833
chr10	29218040	29218296	MACS_peak_17979	760.9	256	chr10:29218041-29222300+	760.9	11.57	5.62	NA	novel	uc011xce.1	9330159F19Rik	exonic	681
chr6	136587044	136587683	MACS_peak_181179	760.82	639	chr6:136571473-136587683+	760.82	8.31	5.62	mmu_circ_0013137	circBase	NM_019426	Atf7ip	exonic	868
chr18	35978283	35978685	MACS_peak_99529	760.52	402	chr18:35978284-35988238+	760.52	12.36	5.61	NA	novel	NM_028707	Psd2	exonic	1300
chr2	25937945	25940313	MACS_peak_112753	740.85	2368	chr2:25937946-25941469-	740.85	7.6	5.64	2_25796989_25793466_-3523|15.10|14|17	PMID:25714049	NM_001276359	Camsap1	exonic	2545
chr4	107861135	107861551	MACS_peak_135811	738.78	416	chr4:107861136-107876081+	738.78	7.79	7.64	NA	novel	NR_033496	Lrp8	sense overlapping	14946
chr10	42196465	42197901	MACS_peak_16627	735.57	1436	chr10:42196466-42197901-	735.57	9.52	5.85	10_41917707_41916272_-1435|21.54|9|13	PMID:25714049	NM_019740	Foxo3	exonic	1436
chr8	45803832	45803961	MACS_peak_181176	709.57	129	chr8:45792781-45805853+	709.57	11.58	5.89	NA	novel	NM_172752	Sorbs2	exonic	2353
chr15	89547428	89549882	MACS_peak_69277	685.17	2454	chr15:89543105-89549882+	685.17	9.24	6.15	NA	novel	NM_021423	Shank3	sense overlapping	6778
chr4	153432047	153432853	MACS_peak_141456	667.64	806	chr4:153432048-153432853-	667.64	14.05	8.13	4_152806962_152806157_-805|20.09|4|4	PMID:25714049	NM_001099299	Ajap1	exonic	806
chr2	157060187	157060412	MACS_peak_115263	642.13	225	chr2:157053519-157060412-	642.13	10.56	8.23	2_156886148_156879255_-6893|19.36|12|21	PMID:25714049	NM_001164663	Soga1	exonic	384
chrX	134689419	134693391	MACS_peak_208370	635.33	3972	chrX:134689420-134693391+	635.33	12.5	8.25	NA	novel	NM_001202500	Armcx4	sense overlapping	3972
chr15	84804759	84805110	MACS_peak_76446	632.48	351	chr15:84803454-84808158-	632.48	15.02	5.52	NA	novel	NR_030731	Phf21b	exonic	576
chr8	83933989	83934528	MACS_peak_184091	621.98	539	chr8:83933990-83934528+	621.98	11.91	6.55	NA	novel	NM_181039	Adgrl1	sense overlapping	539
chr8	87859283	87859484	MACS_peak_203769	602.35	201	chr8:87773567-87859484-	602.35	10.37	5.44	NA	novel	NM_033327	Zfp423	exonic	3501
chr8	8631988	8632452	MACS_peak_181219	590.85	464	chr8:8620314-8639489-	590.85	22.5	8.39	mmu_circ_0015032	circBase	NM_010111	Efnb2	sense overlapping	19176
chr2	131936922	131937230	MACS_peak_110857	586.01	308	chr2:131936923-131937230+	586.01	7.27	6.7	NA	novel	ENSMUST00000124100	PRND	intronic	308
chr13	9735331	9735466	MACS_peak_51995	576.79	135	chr13:9710146-9735466-	576.79	13.92	5.48	13_9734712_9709392_-25320|15.96|22|136	PMID:25714049	NM_001199141	Zmynd11	exonic	457
chr11	102802644	102802916	MACS_peak_34458	572.56	272	chr11:102800612-102802916-	572.56	22.72	8.48	11_102664230_102661926_-2304|19.06|8|20	PMID:25714049	NM_008122	Gjc1	sense overlapping	2305
chr17	5040579	5040774	MACS_peak_80939	551.77	195	chr17:5040580-5097732+	551.77	9.98	8.62	17_5097732_5040580_-57152|20.18|2|2	PMID:25714049	NM_001085355	Arid1b	exonic	354
chr7	16495621	16498871	MACS_peak_169119	549.05	3250	chr7:16495622-16561975-	549.05	9.83	8.61	NA	novel	NM_172739	Arhgap35	sense overlapping	66354
chr9	111364674	111367548	MACS_peak_219489	548.85	2874	chr9:111362258-111377921+	548.85	16.96	5.55	NA	novel	NM_001164659	Trank1	exonic	3788
chr5	8367200	8368240	MACS_peak_142401	529.12	1040	chr5:8367201-8412300-	529.12	8.94	8.69	NA	novel	NM_013726	Dbf4	sense overlapping	45100
chr2	152780666	152782282	MACS_peak_124267	526.64	1616	chr2:152756887-152782282-	526.64	8.44	5.49	NA	novel	NM_009743	Bcl2l1	sense overlapping	25396
chr5	102966445	102966628	MACS_peak_162416	515.24	183	chr5:102926072-102966628-	515.24	15	5.53	5_103395647_103355091_-40556|17.39|11|16	PMID:25714049	NM_009158	Mapk10	exonic	450
chr7	81899025	81900574	MACS_peak_174716	513.39	1549	chr7:81892964-81905636-	513.39	6.8	8.69	NA	novel	NM_013886	Hdgfrp3	sense overlapping	12673
chr5	66451467	66452283	MACS_peak_144728	508.38	816	chr5:66451468-66452283-	508.38	7.48	6.96	mmu_circ_0012736	circBase	NM_009686	Apbb2	exonic	816
chr18	60712722	60713632	MACS_peak_91658	505.16	910	chr18:60712723-60713632-	505.16	16.61	7.01	18_60873286_60872377_-909|17.56|12|25	PMID:25714049	uc008fat.1	Ndst1	exonic	910
chr11	107054264	107056283	MACS_peak_38462	486.55	2019	chr11:107047000-107085373-	486.55	7.61	5.68	NA	novel	NM_176850	Bptf	sense overlapping	38374
chr13	54551998	54553304	MACS_peak_49880	484.34	1306	chr13:54551999-54553304-	484.34	4.97	7.17	NA	novel	NM_133797	4833439L19Rik	sense overlapping	1306
chr8	84676340	84677252	MACS_peak_203333	464.67	912	chr8:84676085-84677252-	464.67	6.16	5.68	NA	novel	NM_025788	Nacc1	exonic	1086
chr10	79858951	79859271	MACS_peak_19716	459.88	320	chr10:79858952-79859955+	459.88	5.44	7.25	NA	novel	NM_008956	Ptbp1	exonic	777
chr9	14561876	14562402	MACS_peak_208851	456.05	526	chr9:14547690-14575439-	456.05	7.64	5.7	9_14379883_14352134_-27749|17.77|5|6	PMID:25714049	NM_001081395	Amotl1	sense overlapping	27750
chr19	12491835	12492550	MACS_peak_105982	452.2	715	chr19:12478126-12492550-	452.2	6.37	5.72	19_12567040_12552616_-14424|17.96|2|2	PMID:25714049	NM_172442	Dtx4	exonic	1316
chr2	29920774	29920885	MACS_peak_113419	450.05	111	chr2:29893444-29922371+	450.05	8.28	5.75	2_29777891_29748964_-28927|18.60|1|2	PMID:25714049	NM_001113213	Odf2	exonic	1788
chr7	57792491	57792629	MACS_peak_186924	443.46	138	chr7:57765424-57792629+	443.46	15.98	5.76	7_65047999_65020794_-27205|16.85|8|20	PMID:25714049	NM_008071	Gabrb3	exonic	442
chr14	28022066	28022288	MACS_peak_57272	439.38	222	chr14:28022067-28025173+	439.38	8.54	9.54	NA	novel	NM_177814	Erc2	sense overlapping	3107
chr7	45523738	45525391	MACS_peak_185758	428.7	1653	chr7:45523739-45525391-	428.7	7.81	5.8	NA	novel	NM_008654	Ppp1r15a	exonic	1653
chr7	65312554	65313424	MACS_peak_187686	426.62	870	chr7:65311004-65342719-	426.62	6.76	5.8	NA	novel	NM_009386	Tjp1	exonic	3990
chr10	53694694	53694876	MACS_peak_19847	425.89	182	chr10:53694695-53699343-	425.89	7.35	5.78	10_53419149_53414501_-4648|15.02|12|18	PMID:25714049	NM_001081428	Fam184a	exonic	1173
chr4	21854346	21854445	MACS_peak_140652	425.54	99	chr4:21854347-21862177+	425.54	9.86	5.78	4_21789324_21781494_-7830|13.56|5|5	PMID:25714049	NM_025669	Pnisr	exonic	875
chr4	108478872	108479837	MACS_peak_133256	423.32	965	chr4:108478873-108491464-	423.32	8.61	7.33	NA	novel	ENSMUST00000119769	Gm12739	sense overlapping	12592
chr6	48024218	48026389	MACS_peak_157385	418.42	2171	chr6:48017639-48029374-	418.42	9.45	7.29	NA	novel	NM_001081382	Zfp777	sense overlapping	11736
chr9	45890803	45890943	MACS_peak_196073	417.84	140	chr9:45866566-45900256-	417.84	6.99	9.91	9_45708339_45674649_-33690|17.06|3|4	PMID:25714049	NM_178709	Rnf214	exonic	1834
chr3	95766153	95766310	MACS_peak_121787	411.34	157	chr3:95766154-95766310-	411.34	13.31	7.4	NA	novel	NM_001081293	Rprd2	sense overlapping	157
chr11	71759577	71760266	MACS_peak_33560	410.76	689	chr11:71759578-71771974+	410.76	13.54	5.83	11_71585476_71573080_-12396|18.19|11|18	PMID:25714049	NM_177618	Wscd1	exonic	1111
chr13	45566572	45568580	MACS_peak_54516	404.93	2008	chr13:45566573-45568580-	404.93	9.31	5.87	NA	novel	NM_009124	Atxn1	exonic	2008
chr1	93016308	93016819	MACS_peak_7532	402.88	511	chr1:93016309-93016819-	402.88	7.33	5.84	NA	novel	NM_008440	Kif1a	sense overlapping	511
chr7	133759399	133759913	MACS_peak_194902	401.97	514	chr7:133759400-133759913-	401.97	4.37	5.85	7_140951596_140951083_-513|19.58|3|4	PMID:25714049	NM_133941	Dhx32	exonic	514
chr3	107758183	107758338	MACS_peak_135860	389.08	155	chr3:107758184-107758338+	389.08	11.91	5.81	NA	novel	NM_007778	Csf1	antisense	155
chr7	16960470	16961108	MACS_peak_183225	385.46	638	chr7:16960393-16961108+	385.46	6.36	5.94	NA	novel	NM_001007569	Pnmal1	sense overlapping	716
chr15	78671855	78674740	MACS_peak_69028	374.62	2885	chr15:78671856-78674740-	374.62	7.94	10.63	mmu_circ_0000618	circBase	NM_183141	Elfn2	sense overlapping	2885
chr11	108922201	108922296	MACS_peak_35450	374.15	95	chr11:108922202-108922352-	374.15	14.35	10.65	NA	novel	NM_015732	Axin2	antisense	151
chr9	107852316	107853524	MACS_peak_202090	369.87	1208	chr9:107833434-107861729-	369.87	4.39	10.71	mmu_circ_0015242	circBase	NM_011251	Rbm6	sense overlapping	28296
chr4	148241126	148241373	MACS_peak_152706	362.31	247	chr4:148241127-148241373-	362.31	12.2	6.12	NA	novel	NM_001083342	Ptchd2	sense overlapping	247
chr13	54525372	54526672	MACS_peak_49873	358.43	1300	chr13:54523970-54529223+	358.43	10.54	8.11	13_54630584_54625331_-5253|16.50|5|7	PMID:25714049	NM_176987	Simc1	exonic	3006
chr6	128355358	128356003	MACS_peak_166720	353.04	645	chr6:128333833-128359354+	353.04	12.47	10.93	NA	novel	ENSMUST00000180586	Gm26770	sense overlapping	25522
chr2	169883525	169886459	MACS_peak_114893	352.92	2934	chr2:169883526-169886459-	352.92	8.97	8.12	NA	novel	ENSMUST00000180945	Gm26883	sense overlapping	2934
chr7	44864195	44864445	MACS_peak_168258	350.81	250	chr7:44863699-44864445-	350.81	6.84	8.1	NA	novel	NM_133949	Ptov1	sense overlapping	747
chr2	132808043	132809018	MACS_peak_122678	346.57	975	chr2:132805143-132812175-	346.57	11.5	6.28	NA	novel	NM_175113	Trmt6	sense overlapping	7033
chr5	34628414	34628513	MACS_peak_142693	326.77	99	chr5:34619350-34628513+	326.77	8.7	8.43	5_34971162_34961999_-9163|15.66|2|3	PMID:25714049	NM_013457	Add1	exonic	448
chr3	55116983	55117775	MACS_peak_120985	325.17	792	chr3:55116984-55117795+	325.17	7.32	11.41	NA	novel	NM_144895	Spg20	exonic	812
chr5	136485541	136485851	MACS_peak_152126	323.59	310	chr5:136485533-136485851-	323.59	4.88	8.44	NA	novel	ENSMUST00000175918	Cux1	intronic	319
chr4	149328365	149330439	MACS_peak_152916	322.87	2074	chr4:149307429-149387216-	322.87	9.99	6.47	NA	novel	NM_008441	Kif1b	sense overlapping	79788
chr16	11253642	11253986	MACS_peak_71918	322.76	344	chr16:11253643-11253986-	322.76	5.81	8.43	NA	novel	NM_146066	Gspt1	sense overlapping	344
chr6	121413509	121413616	MACS_peak_180003	312.04	107	chr6:121410614-121413616-	312.04	7.67	6.53	6_121363634_121360632_-3002|16.51|5|6	PMID:25714049	NR_110358	Iqsec3	exonic	1271
chr18	45559664	45559850	MACS_peak_92600	311.6	186	chr18:45559665-45559850+	311.6	7.53	11.68	NA	novel	uc008evd.1	Kcnn2	sense overlapping	186
chr6	28526052	28526213	MACS_peak_171242	307.58	161	chr6:28520145-28531499+	307.58	7.62	6.56	NA	novel	NM_019776	Snd1	exonic	810
chr11	74928992	74930748	MACS_peak_33909	303.61	1756	chr11:74928993-74946219+	303.61	11.77	6.62	11_74759721_74742495_-17226|12.64|13|19	PMID:25714049	NM_001002764	Smg6	exonic	2570
chr10	93264879	93265680	MACS_peak_24309	301.04	801	chr10:93264880-93284977-	301.04	8.92	6.71	NA	novel	NM_013508	Elk3	exonic	1010
chr2	120533510	120535679	MACS_peak_121083	300.28	2169	chr2:120533511-120535679+	300.28	5.17	6.72	NA	novel	ENSMUST00000181963	Gm26899	sense overlapping	2169
chr6	128374528	128375793	MACS_peak_163723	295.66	1265	chr6:128365658-128400301+	295.66	10.66	8.86	NA	novel	NM_008021	Foxm1	sense overlapping	34644
chr10	17914991	17916032	MACS_peak_14930	290.59	1041	chr10:17908034-17916032-	290.59	5.58	8.95	10_17635838_17627840_-7998|20.34|10|27	PMID:25714049	NM_001033432	Heca	exonic	1196
chr5	125622460	125623352	MACS_peak_166084	289.32	892	chr5:125622461-125623352+	289.32	5.18	6.71	5_126103722_126102831_-891|22.45|10|22	PMID:25714049	NM_001190352	Tmem132b	exonic	892
chr2	84710317	84711472	MACS_peak_107000	286.44	1155	chr2:84710318-84711472-	286.44	11.12	8.92	2_84551629_84550475_-1154|17.16|1|2	PMID:25714049	NM_144887	Zdhhc5	exonic	1155
chr2	103775609	103775765	MACS_peak_110228	277.61	156	chr2:103775417-103776157-	277.61	6.65	12.69	2_103616314_103615574_-740|13.47|11|14	PMID:25714049	NM_016739	Caprin1	exonic	405
chr3	88162957	88163087	MACS_peak_120947	270.57	130	chr3:88161191-88163087+	270.57	8.18	9.19	mmu_circ_0010853	circBase	NM_133665	Mef2d	exonic	321
chr3	105458738	105459921	MACS_peak_135594	263.88	1183	chr3:105458739-105459921+	263.88	6.04	6.8	3_105262839_105261657_-1182|19.69|3|5	PMID:25714049	NM_001039347	Kcnd3	exonic	1183
chr17	84993679	84994539	MACS_peak_95921	254.43	860	chr17:84993680-85005566+	254.43	5.93	6.86	NA	novel	NM_011151	Ppm1b	exonic	1148
chr8	105663753	105664543	MACS_peak_205022	253.61	790	chr8:105663754-105670351+	253.61	6.2	6.84	8_108194251_108187654_-6597|15.73|11|21	PMID:25714049	NM_181322	Ctcf	exonic	1216
chr5	33744806	33745191	MACS_peak_144951	245.52	385	chr5:33742440-33745191-	245.52	9.62	13.94	NA	novel	NM_019694	Letm1	sense overlapping	2752
chr7	99944820	99945682	MACS_peak_176393	237.97	862	chr7:99924296-99955540-	237.97	17.07	14.12	7_107104050_107072806_-31244|17.58|19|72	PMID:25714049	NM_175388	Rnf169	sense overlapping	31245
chr17	12277920	12278111	MACS_peak_88927	227.48	191	chr17:12270863-12278111-	227.48	9.6	7.2	NA	novel	NM_011948	Map3k4	exonic	1549
chr12	101858055	101858205	MACS_peak_49538	227.39	150	chr12:101858056-101858205-	227.39	9.28	7.2	NA	novel	ENSMUST00000021605	Trip11	intronic	150
chr3	86084196	86085357	MACS_peak_133417	222.79	1161	chr3:86075148-86085357+	222.79	6.72	7.18	3_85889279_85879070_-10209|21.05|2|2	PMID:25714049	NM_001082414	Sh3d19	sense overlapping	10210
chr6	28426162	28426561	MACS_peak_155318	216.17	399	chr6:28426163-28426561+	216.17	7.56	10.26	NA	novel	NM_007480	Arf5	sense overlapping	399
chr1	62637565	62638184	MACS_peak_4307	213.52	619	chr1:62637566-62638184+	213.52	8.83	15.2	1_62684758_62684140_-618|21.20|5|5	PMID:25714049	NM_001081050	Pard3b	sense overlapping	619
chr12	76939449	76940090	MACS_peak_46476	207.58	641	chr12:76937915-76940090-	207.58	9.76	7.44	NA	novel	NM_008558	Max	sense overlapping	2176
chr17	26142617	26143576	MACS_peak_90237	201.54	959	chr17:26142618-26143576+	201.54	11.56	7.47	17_26280521_26279563_-958|17.52|6|14	PMID:25714049	NM_009733	Axin1	exonic	959
chr14	62587152	62587886	MACS_peak_58917	201.39	734	chr14:62587153-62587886+	201.39	4.55	10.45	mmu_circ_0005337	circBase	NM_001243857	Fam124a	exonic	734
chr5	31548404	31548653	MACS_peak_142212	201.34	249	chr5:31536138-31553887+	201.34	4.83	10.46	NA	novel	NM_009206	Slc4a1ap	sense overlapping	17750
chr2	93813398	93813964	MACS_peak_119153	191.35	566	chr2:93806025-93813964-	191.35	4.4	7.6	2_93654121_93646182_-7939|16.79|7|11	PMID:25714049	NM_010163	Ext2	exonic	773
chr15	83791953	83792258	MACS_peak_68474	190.45	305	chr15:83791954-83800184+	190.45	6.36	10.66	mmu_circ_0000630	circBase	NM_172610	Mpped1	exonic	487
chr3	108080136	108080720	MACS_peak_125027	185.05	584	chr3:108080137-108080720-	185.05	7.37	16.55	NA	novel	NM_028779	Ampd2	sense overlapping	584
chr14	99301382	99301566	MACS_peak_61003	182.98	184	chr14:99301383-99301566-	182.98	6.52	10.95	NA	novel	NM_009769	Klf5	antisense	184
chr2	110032331	110032439	MACS_peak_120201	181.22	108	chr2:110032332-110041402+	181.22	7.04	7.71	2_109881559_109872489_-9070|13.66|7|14	PMID:25714049	NM_026613	Ccdc34	exonic	409
chr18	84558326	84559362	MACS_peak_104340	173.25	1036	chr18:84552870-84563046-	173.25	7.39	7.79	mmu_circ_0000912	circBase	NM_001033341	Zfp407	exonic	4835
chr6	47926274	47927340	MACS_peak_160156	170.27	1066	chr6:47920657-47931761+	170.27	5.39	17.35	NA	novel	NM_145576	Zfp212	sense overlapping	11105
chr1	106029751	106031102	MACS_peak_8093	162.7	1351	chr1:106006015-106031233+	162.7	9	7.9	NA	novel	NM_001122676	Zcchc2	exonic	2326
chr2	118919132	118919515	MACS_peak_111172	159.97	383	chr2:118915888-118921696+	159.97	6.83	17.77	2_118747432_118741624_-5808|19.77|9|19	PMID:25714049	NM_001045523	Bahd1	exonic	2143
chr11	80952479	80952607	MACS_peak_32029	131.83	128	chr11:80952480-80971614-	131.83	7.95	19.5	11_80785116_80765982_-19134|25.46|14|50	PMID:25714049	NM_007384	Asic2	exonic	279
chr16	14099925	14100907	MACS_peak_80315	129.98	982	chr16:14099926-14100907+	129.98	4.75	8.19	NA	novel	NM_144518	2900011O08Rik	sense overlapping	982
chr8	95713801	95714435	MACS_peak_204640	121.31	634	chr8:95713802-95714435+	121.31	3.72	8.35	NA	novel	NM_145602	Ndrg4	sense overlapping	634
chr19	4324248	4325574	MACS_peak_96430	118.18	1326	chr19:4319180-4362914-	118.18	4.52	20.16	NA	novel	NM_001001984	Kdm2a	sense overlapping	43735
chr11	43704533	43705477	MACS_peak_27849	114.46	944	chr11:43704534-43705477+	114.46	7.73	20.22	mmu_circ_0000254	circBase	NM_001164231	Pwwp2a	exonic	944
chr2	128675670	128675891	MACS_peak_110429	113.66	221	chr2:128658248-128684663-	113.66	4.6	13.67	NA	novel	NM_008569	Anapc1	exonic	2263
chr2	91772290	91773011	MACS_peak_118856	103.63	721	chr2:91766447-91773747+	103.63	3.78	8.58	2_91613904_91606604_-7300|18.91|8|12	PMID:25714049	NM_172669	Ambra1	exonic	2194
chr5	134176399	134176882	MACS_peak_154192	100.53	483	chr5:134176400-134256008-	100.53	7.98	21.51	NA	novel	NM_010365	Gtf2i	sense overlapping	79609
chr15	50846013	50846942	MACS_peak_72989	99.72	929	chr15:50822105-50846942-	99.72	6.46	8.82	15_50678488_50653651_-24837|17.61|6|9	PMID:25714049	NM_032000	Trps1	exonic	2663
chr11	78341868	78342183	MACS_peak_34610	96.15	315	chr11:78341869-78342183-	96.15	5.72	8.8	NA	novel	NM_201406	Pigs	antisense	315
chr11	8492092	8493337	MACS_peak_27980	91.12	1245	chr11:8492093-8493337-	91.12	3.66	8.93	NA	novel	NM_001083587	Tns3	exonic	1245
chr7	45343740	45343803	MACS_peak_171447	89.13	63	chr7:45343741-45346932-	89.13	7.52	22.44	mmu_circ_0014208	circBase	NM_029741	Ppfia3	exonic	264
chr5	121163137	121163254	MACS_peak_149616	87.88	117	chr5:121137417-121172103-	87.88	3.44	15.43	NA	novel	NM_011202	Ptpn11	exonic	1710
chr3	52345038	52346418	MACS_peak_120765	87.53	1380	chr3:52345039-52348247+	87.53	4.64	22.7	3_52152169_52148961_-3208|15.74|2|2	PMID:25714049	NM_019739	Foxo1	sense overlapping	3209
chr2	172468996	172469119	MACS_peak_126968	78.11	123	chr2:172468997-172469183-	78.11	6.17	9.69	NA	novel	NM_025542	Rtfdc1	antisense	187
chr11	59208406	59208865	MACS_peak_28609	73.52	459	chr11:59208407-59208865+	73.52	5.49	16.95	NA	novel	NM_024210	2310033P09Rik	sense overlapping	459
chr16	17468892	17469358	MACS_peak_72648	73.34	466	chr16:17468893-17469358+	73.34	4.1	16.99	16_17469451_17468986_-465|17.41|11|21	PMID:25714049	NM_007764	Crkl	exonic	466
chr6	42668402	42668587	MACS_peak_173297	70.71	185	chr6:42668403-42668587-	70.71	5.79	10.13	NA	novel	ENSMUST00000045054	Fam115a	sense overlapping	185
chr5	63804555	63806127	MACS_peak_159362	65.53	1572	chr5:63804371-63809098+	65.53	4.38	10.5	NA	novel	ENSMUST00000162757	3110047P20Rik	intronic	4728
chr9	72718313	72718838	MACS_peak_195961	64.85	525	chr9:72718314-72747605+	64.85	4.52	18	NA	novel	NM_010890	Nedd4	sense overlapping	29292
chr10	98968693	98969124	MACS_peak_22630	62.41	431	chr10:98968694-98969124+	62.41	3.24	25.96	10_98431758_98431328_-430|20.96|15|30	PMID:25714049	NM_026482	Atp2b1	exonic	431
