# Supplementary material for: The landscape of m1A modification and its posttranscriptional regulatory functions in primary neurons
Source: eLife. 2023 Mar 7;12:e85324. doi: 10.7554/eLife.85324 (PMC9991057; doi:10.7554/eLife.85324)
Supplement: Figure 4—source data 2. [file elife-85324-fig4-data2.xlsx]

## Sheet: Down-OGDR1.5h_vs_control
Chromosome	Transcript start	Transcript end	Peak ID	Score	Peak length	circRNA	Fold change	P value	FDR	Regulation	circBaseID	Source	Best transcript	Gene name	Catalog	Predicted sequence length
chr5	117998061	117998380	diffreps_peak_00112067	5.09064	319	chr5:117994564-118009243+	8.28662	8.11634e-06	0.000168699	down	NA	novel	NM_145564	Fbxo21	sense overlapping	14680
chr15	71720861	71721160	diffreps_peak_00048724	7.58001	299	chr15:71678579-71727732-	9.67857	2.63018e-08	1.98786e-06	down	NA	novel	NM_177819	Fam135b	sense overlapping	49154
chr9	103162541	103162653	diffreps_peak_00151152	5.93904	112	chr9:103160820-103163903+	2.35337	1.15069e-06	3.54596e-05	down	9_103066233_103063150_-3083|15.34|15|57	PMID:25714049	NM_173781	Rab6b	exonic	366
chr13	52530576	52530752	diffreps_peak_00037396	5.87138	176	chr13:52530577-52530752-	2.99165	1.34469e-06	4.02105e-05	down	NA	novel	NM_001024474	Diras2	sense overlapping	176
chr13	99425234	99425389	diffreps_peak_00039372	5.07024	155	chr13:99425235-99425389-	2.07965	8.50667e-06	0.000174867	down	NA	novel	NM_008634	Map1b	sense overlapping	155
chr8	64822990	64823097	diffreps_peak_00138961	5.68693	107	chr8:64811680-64834568-	2.02115	2.05621e-06	5.65525e-05	down	mmu_circ_0001679	circBase	NM_178633	Klhl2	exonic	355
chr10	108831105	108831171	diffreps_peak_00016043	8.72393	66	chr10:108831106-108902315-	3.24411	1.8883e-09	3.30785e-07	down	10_108339371_108268162_-71209|18.87|3|6	PMID:25714049	NM_009306	Syt1	exonic	167
chr10	127087401	127087506	diffreps_peak_00017138	5.92781	105	chr10:127087234-127087506+	2.20306	1.18084e-06	3.62145e-05	down	NA	novel	NM_001033263	Agap2	exonic	192
chr9	29431921	29432340	diffreps_peak_00146056	6.83069	419	chr9:29411556-29462422-	6.15085	1.47676e-07	7.10895e-06	down	NA	novel	NM_172290	Ntm	sense overlapping	50867
chr4	20652299	20652540	diffreps_peak_00094759	5.1606	241	chr4:20652300-20652636-	7.83957	6.9087e-06	0.000149014	down	NA	novel	ENSMUST00000102998	Nkain3	intronic	337
chr11	81151941	81152400	diffreps_peak_00023748	9.12745	459	chr11:81146081-81159306-	3.61681	7.45675e-10	1.71119e-07	down	NA	novel	ENSMUST00000066197	Asic2	intronic	13226
chr9	29344401	29344548	diffreps_peak_00146033	5.86918	147	chr9:29343521-29344548-	68	1.35152e-06	4.03272e-05	down	9_29152133_29151106_-1027|14.27|13|26	PMID:25714049	ENSMUST00000075069	Ntm	intronic	1028
chr15	71723181	71723580	diffreps_peak_00048725	7.83771	399	chr15:71678579-71727732-	3.34719	1.45309e-08	1.29243e-06	down	NA	novel	NM_177819	Fam135b	sense overlapping	49154
chr9	103566991	103567140	diffreps_peak_00151232	7.12521	149	chr9:103566992-103567176-	9.89062	7.49539e-08	4.20594e-06	down	NA	novel	ENSMUST00000049452	Tmem108	intronic	185
chr13	91972341	91972540	diffreps_peak_00039003	6.17747	199	chr13:91919828-91988039-	84.3	6.64552e-07	2.29925e-05	down	mmu_circ_0004872	circBase	NM_009027	Rasgrf2	sense overlapping	68212
chr10	108629241	108629780	diffreps_peak_00016014	6.15828	539	chr10:108620850-108642398-	2.2325	6.94569e-07	2.36793e-05	down	NA	novel	NM_009306	Syt1	sense overlapping	21549
chr8	65702461	65702980	diffreps_peak_00138978	6.10112	519	chr8:65694851-65721237+	2.97016	7.92281e-07	2.62471e-05	down	NA	novel	ENSMUST00000110258	2022-03-01	intronic	26387
chr8	109912361	109912435	diffreps_peak_00142553	5.73412	74	chr8:109876803-109928655+	11.5316	1.84453e-06	5.16314e-05	down	NA	novel	NM_001122594	Phlpp2	exonic	1982
chr8	58837612	58837770	diffreps_peak_00138773	7.73192	158	chr8:58837613-58837770-	12.2689	1.85387e-08	1.54938e-06	down	NA	novel	ENSMUST00000077447	Galntl6	intronic	158
chr5	150369468	150369572	diffreps_peak_00116230	6.81931	104	chr5:150358799-150378980+	5.70073	1.51595e-07	7.24825e-06	down	5_151181555_151161374_-20181|15.43|2|2	PMID:25714049	NM_172887	Fry	exonic	766
chrX	50605241	50605480	diffreps_peak_00154301	5.77251	239	chrX:50584768-50621132+	71.1	1.68847e-06	4.80511e-05	down	NA	novel	NR_015505	Firre	antisense	36365
chr18	60987646	60987798	diffreps_peak_00068747	5.17557	152	chr18:60987647-60987798+	2.05173	6.67475e-06	0.000144651	down	NA	novel	NM_009792	Camk2a	sense overlapping	152
chr8	66197208	66197300	diffreps_peak_00139020	7.63196	92	chr8:66197209-66197406+	9.84279	2.33366e-08	1.82044e-06	down	NA	novel	ENSMUST00000072482	2022-03-01	intronic	198
chrX	159443649	159444280	diffreps_peak_00157050	6.08797	631	chrX:159443650-159446098+	2.21849	8.16644e-07	2.68804e-05	down	NA	novel	NM_001081124	Map7d2	sense overlapping	2449
chr7	57812053	57812206	diffreps_peak_00129239	5.61022	153	chr7:57788866-57816519+	2.2238	2.45349e-06	6.48089e-05	down	7_65071889_65044236_-27653|16.37|10|18	PMID:25714049	NM_008071	Gabrb3	exonic	619
chr18	38704801	38705200	diffreps_peak_00067732	5.75389	399	chr18:38676718-38739468+	7.31757	1.76243e-06	4.97617e-05	down	NA	novel	ENSMUST00000127448	Arhgap26	sense overlapping	62751
chr13	83628221	83628480	diffreps_peak_00038776	7.39224	259	chr13:83621234-83661619-	7.02252	4.05285e-08	2.71773e-06	down	NA	novel	NM_025282	Mef2c	antisense	40386
chr11	6125121	6125520	diffreps_peak_00018223	6.67397	399	chr11:6108076-6125561-	2.04456	2.1185e-07	9.41323e-06	down	NA	novel	NM_173748	Nudcd3	sense overlapping	17486
chr17	81445486	81445593	diffreps_peak_00065006	6.11134	107	chr17:81388810-81445593-	2.41344	7.73848e-07	2.57941e-05	down	17_81844933_81788150_-56783|18.61|18|123	PMID:25714049	NM_001286684	Slc8a1	exonic	995
chr2	136750601	136751033	diffreps_peak_00082949	5.88005	432	chr2:136749378-136751033+	91.3	1.3181e-06	3.95599e-05	down	NA	novel	ENSMUST00000028727	Snap25	intronic	1656
chr17	74232661	74232980	diffreps_peak_00064655	5.22384	319	chr17:74201057-74245087-	81	5.97253e-06	0.000131989	down	17_74644427_74600397_-44030|11.47|10|17	PMID:25714049	NM_133771	Memo1	sense overlapping	44031
chr15	80117761	80117794	diffreps_peak_00050011	6.60511	33	chr15:80117251-80117794+	3.31062	2.4825e-07	1.07142e-05	down	NA	novel	NM_207708	Syngr1	sense overlapping	544
chr16	72935401	72935780	diffreps_peak_00057314	10.1205	379	chr16:72933213-72935786-	2.60241	7.57642e-11	3.26179e-08	down	NA	novel	NM_019413	Robo1	antisense	2574
chr13	104979661	104980040	diffreps_peak_00039659	5.92842	379	chr13:104951438-104982996-	89.2	1.17917e-06	3.6169e-05	down	NA	novel	NM_029879	Rgs7bp	sense overlapping	31559
chr5	29752396	29752459	diffreps_peak_00106458	6.29093	63	chr5:29748345-29753652+	2.87072	5.1176e-07	1.87174e-05	down	NA	novel	NM_011847	Dnajb6	exonic	375
chr10	79864896	79865280	diffreps_peak_00013859	5.09009	384	chr10:79864897-79865714-	2.54576	8.12657e-06	0.000168815	down	NA	novel	NR_038088	Bc1	intronic	818
chr5	44742581	44743080	diffreps_peak_00107785	7.14854	499	chr5:44740245-44744298-	5.08328	7.10326e-08	4.04797e-06	down	NA	novel	ENSMUST00000070748	Ldb2	intronic	4054
chr4	103929441	103929660	diffreps_peak_00098531	6.39131	219	chr4:103882248-103951993+	101	4.06155e-07	1.56158e-05	down	NA	novel	uc008txu.1	Dab1	sense overlapping	69746
chr5	57917321	57917660	diffreps_peak_00108168	5.62596	339	chr5:57913156-57942262+	16.5	2.36616e-06	6.30546e-05	down	5_58333501_58304395_-29106|18.35|12|61	PMID:25714049	NM_001122758	Pcdh7	sense overlapping	29107
chr9	89603001	89603360	diffreps_peak_00150495	7.93663	359	chr9:89601042-89603394-	41.2826	1.1571e-08	1.12753e-06	down	mmu_circ_0001826	circBase	NM_153509	AF529169	exonic	2353
chr6	119055621	119055840	diffreps_peak_00122539	7.21816	219	chr6:119005038-119057515-	5.60677	6.05111e-08	3.59327e-06	down	6_119007533_118955056_-52477|23.94|2|2	PMID:25714049	NM_009781	Cacna1c	sense overlapping	52478
chr7	46629521	46629960	diffreps_peak_00128699	9.56633	439	chr7:46567105-46635556-	6.68106	2.71438e-10	8.15456e-08	down	7_53890926_53822475_-68451|18.11|4|4	PMID:25714049	NM_013789	Sergef	sense overlapping	68452
chr9	28039421	28039700	diffreps_peak_00145824	7.03998	279	chr9:28039051-28039884+	6.1468	9.12058e-08	4.87876e-06	down	9_27847469_27846636_-833|18.80|3|4	PMID:25714049	ENSMUST00000115243	Opcml	intronic	834
chr12	103133141	103133520	diffreps_peak_00033923	5.46528	379	chr12:103122321-103156560+	9.05732	3.42546e-06	8.53665e-05	down	NA	novel	NM_001081017	Unc79	sense overlapping	34240
chr6	89669061	89669440	diffreps_peak_00120715	9.26017	379	chr6:89650526-89675004+	3.18256	5.49323e-10	1.36449e-07	down	6_89624998_89600520_-24478|17.15|1|2	PMID:25714049	NM_153162	Txnrd3	sense overlapping	24479
chr17	46840761	46840960	diffreps_peak_00062922	5.42866	199	chr17:46809568-46858698-	72.6	3.72679e-06	9.10818e-05	down	NA	novel	NM_001100452	Gltscr1l	sense overlapping	49131
chr8	66112441	66112940	diffreps_peak_00139016	5.90067	499	chr8:66024054-66121899+	4.46008	1.25698e-06	3.80528e-05	down	8_68645798_68547953_-97845|18.24|3|3	PMID:25714049	ENSMUST00000072482	2022-03-01	intronic	97846
chr5	124417421	124417700	diffreps_peak_00113068	5.42759	279	chr5:124373806-124422979-	65	3.73599e-06	9.12521e-05	down	NA	novel	NM_001081203	Sbno1	sense overlapping	49174
chr13	104951461	104951840	diffreps_peak_00039656	6.57296	379	chr13:104951438-104982996-	2.35394	2.67325e-07	1.13562e-05	down	NA	novel	NM_029879	Rgs7bp	sense overlapping	31559
chr13	91554281	91554580	diffreps_peak_00038969	5.55441	299	chr13:91524585-91594723+	82.3	2.78991e-06	7.2115e-05	down	13_91734328_91664190_-70138|16.97|6|6	PMID:25714049	NM_024186	Ssbp2	sense overlapping	70139
chr7	25005750	25005911	diffreps_peak_00126044	7.29052	161	chr7:25005751-25005911-	2.42141	5.12244e-08	3.20533e-06	down	NA	novel	NM_001290469	Atp1a3	sense overlapping	161
chr5	52010621	52010791	diffreps_peak_00108005	5.0237	170	chr5:52010620-52010791-	58.1	9.46892e-06	0.000190874	down	NA	novel	NA	NA	intergenic	172
chr10	108641941	108642398	diffreps_peak_00016019	6.33082	457	chr10:108620850-108642398-	2.85868	4.66858e-07	1.73759e-05	down	NA	novel	NM_009306	Syt1	sense overlapping	21549
chr10	81466049	81466380	diffreps_peak_00014541	5.87755	331	chr10:81466050-81466924-	2.13325	1.32572e-06	3.97335e-05	down	NA	novel	ENSMUST00000118763	Celf5	intronic	875
chr1	164442921	164443256	diffreps_peak_00007806	5.41537	335	chr1:164441575-164443256-	2.11296	3.84263e-06	9.33894e-05	down	NA	novel	NM_009721	Atp1b1	sense overlapping	1682
chr7	99330014	99330169	diffreps_peak_00131787	5.72236	155	chr7:99330015-99330169+	3.00326	1.89513e-06	5.28026e-05	down	NA	novel	ENSMUST00000068973	Map6	intronic	155
chr10	14047221	14047660	diffreps_peak_00010463	5.51594	439	chr10:14004198-14066684+	4.18417	3.04831e-06	7.76772e-05	down	mmu_circ_0002087	circBase	NM_010437	Hivep2	sense overlapping	62487
chr7	99317602	99317779	diffreps_peak_00131780	6.80247	177	chr7:99317603-99317779+	2.23107	1.5759e-07	7.46175e-06	down	NA	novel	ENSMUST00000107100	Map6	intronic	177
chr11	118505622	118506040	diffreps_peak_00028131	6.42045	418	chr11:118505623-118513404+	2.6377	3.79793e-07	1.4836e-05	down	NA	novel	NM_001024931	Rbfox3	antisense	7782
chr15	66255781	66256267	diffreps_peak_00048566	6.43886	486	chr15:66254726-66256267-	3.02534	3.64033e-07	1.43379e-05	down	NA	novel	ENSMUST00000070256	Kcnq3	intronic	1542
chr13	14247281	14247480	diffreps_peak_00035623	5.23899	199	chr13:14230569-14306933-	3.53352	5.76777e-06	0.000128628	down	NA	novel	NM_001081348	Hecw1	sense overlapping	76365
chr2	37935461	37935840	diffreps_peak_00078091	5.19966	379	chr2:37905006-37983105-	68.3	6.31453e-06	0.00013825	down	NA	novel	NM_146122	Dennd1a	sense overlapping	78100
chr17	50673041	50673360	diffreps_peak_00063282	5.36363	319	chr17:50667999-50688027+	64.6	4.32884e-06	0.00010225	down	17_50827352_50807324_-20028|13.13|4|4	PMID:25714049	NM_013880	Plcl2	sense overlapping	20029
chr2	62760541	62760860	diffreps_peak_00079043	6.93893	319	chr2:62702916-62777681-	8.53712	1.15098e-07	5.84987e-06	down	2_62615738_62540973_-74765|17.58|8|13	PMID:25714049	NM_133207	Kcnh7	sense overlapping	74766
chr12	109560021	109560104	diffreps_peak_00034327	6.48933	83	chr12:109559928-109560104+	2.30426	3.24091e-07	1.31099e-05	down	NA	novel	uc007pat.2	Meg3	intronic	177
chr10	79865441	79865714	diffreps_peak_00013860	5.11912	273	chr10:79864897-79865714-	2.00552	7.60122e-06	0.000160969	down	NA	novel	NR_038088	Bc1	intronic	818
chr16	7289381	7289760	diffreps_peak_00053445	5.10822	379	chr16:7285478-7311613+	8.24359	7.79432e-06	0.000164721	down	NA	novel	NM_021477	Rbfox1	sense overlapping	26136
chr12	29827041	29827500	diffreps_peak_00030147	6.47114	459	chr12:29811373-29827831+	2.59531	3.37956e-07	1.35475e-05	down	12_30512696_30496238_-16458|13.72|2|3	PMID:25714049	NM_008666	Myt1l	exonic	1328
chr11	117755861	117756260	diffreps_peak_00027920	5.47698	399	chr11:117732168-117761006+	2.44608	3.3344e-06	8.35748e-05	down	NA	novel	NM_198022	Tnrc6c	sense overlapping	28839
chr6	119599131	119599180	diffreps_peak_00122593	7.20599	49	chr6:119599132-119599317+	114.3	6.22309e-08	3.67675e-06	down	NA	novel	NM_053204	Erc1	antisense	186
chr19	27239844	27239970	diffreps_peak_00072591	5.22822	126	chr19:27230196-27248026+	3.68821	5.91261e-06	0.000130905	down	NA	novel	NM_013703	Vldlr	exonic	2504
chr9	9811021	9811620	diffreps_peak_00144617	6.73629	599	chr9:9743575-9833565-	4.84762	1.8353e-07	8.40076e-06	down	9_9833565_9743575_-89990|11.31|1|3	PMID:25714049	NM_001033359	Cntn5	sense overlapping	89991
chr10	117824561	117824651	diffreps_peak_00016444	6.30975	90	chr10:117824476-117824651-	2.19498	4.90061e-07	1.80559e-05	down	NA	novel	NM_024457	Rap1b	sense overlapping	176
chr1	56891162	56891265	diffreps_peak_00002314	9.27031	103	chr1:56831439-56891265-	2.20636	5.3665e-10	1.34278e-07	down	1_56948109_56888283_-59826|19.48|7|11	PMID:25714049	NM_139146	Satb2	exonic	1143
chrX	159482961	159483086	diffreps_peak_00157061	6.18467	125	chrX:159462114-159483086+	3.17321	6.53629e-07	2.27026e-05	down	X_155921018_155900046_-20972|15.92|13|55	PMID:25714049	NM_001081124	Map7d2	exonic	793
chr7	74511941	74512600	diffreps_peak_00130199	6.82565	659	chr7:74504177-74547081-	5.92123	1.49399e-07	7.17336e-06	down	NA	novel	NM_023908	Slco3a1	sense overlapping	42905
chr13	83642181	83642380	diffreps_peak_00038777	5.84378	199	chr13:83621234-83661619-	92.5	1.4329e-06	4.23662e-05	down	NA	novel	NM_025282	Mef2c	antisense	40386
chrX	157826356	157826540	diffreps_peak_00157008	5.16256	184	chrX:157826357-157834073-	3.4624	6.8776e-06	0.000148468	down	NA	novel	NM_177751	Cnksr2	sense overlapping	7717
chr1	165908221	165908600	diffreps_peak_00007894	6.66255	379	chr1:165875382-165915163-	12.9494	2.17496e-07	9.60757e-06	down	NA	novel	NM_011137	Pou2f1	sense overlapping	39782
chr9	29412341	29412840	diffreps_peak_00146053	6.48326	499	chr9:29411556-29462422-	3.18695	3.28651e-07	1.32474e-05	down	NA	novel	NM_172290	Ntm	sense overlapping	50867
chr4	48614956	48614983	diffreps_peak_00096464	6.4884	27	chr4:48604581-48617331+	2.79915	3.24785e-07	1.31354e-05	down	mmu_circ_0001204	circBase	NM_021436	Tmeff1	exonic	364
chr11	6033841	6034080	diffreps_peak_00018199	7.77442	239	chr11:6015450-6047685-	104	1.68105e-08	1.44079e-06	down	NA	novel	NM_007595	Camk2b	sense overlapping	32236
chr14	28324261	28324540	diffreps_peak_00041713	6.80051	279	chr14:28317249-28384043+	7.28966	1.58304e-07	7.48693e-06	down	14_29197229_29130435_-66794|12.50|13|72	PMID:25714049	ENSMUST00000090302	Erc2	intronic	66795
chr3	82377045	82377460	diffreps_peak_00089708	6.10739	415	chr3:82377046-82379007+	2.12177	7.80918e-07	2.59833e-05	down	NA	novel	NM_001081230	Map9	sense overlapping	1962
chr18	61152184	61152260	diffreps_peak_00068768	5.3815	76	chr18:61152185-61155432-	6.21993	4.15432e-06	9.9571e-05	down	18_61315086_61311839_-3247|20.91|2|2	PMID:25714049	NM_134134	Hmgxb3	exonic	370
chr1	165601081	165601360	diffreps_peak_00007858	5.65855	279	chr1:165593391-165608604-	86.9	2.19509e-06	5.95255e-05	down	1_167538735_167523522_-15213|13.67|4|4	PMID:25714049	NM_001001880	Mpzl1	sense overlapping	15214
chr11	4939454	4939619	diffreps_peak_00017982	6.29582	165	chr11:4939455-4939619-	2.32712	5.06032e-07	1.85476e-05	down	NA	novel	NM_010904	Nefh	sense overlapping	165
chr18	33193981	33194360	diffreps_peak_00066972	6.26016	379	chr18:33187738-33194734+	3.41691	5.49334e-07	1.98367e-05	down	NA	novel	NM_009793	Camk4	sense overlapping	6997
chr9	112184621	112185080	diffreps_peak_00152384	5.97829	459	chr9:112176095-112187766+	2.63703	1.05127e-06	3.29185e-05	down	NA	novel	NM_028755	Arpp21	antisense	11672
chr6	124916441	124916640	diffreps_peak_00123063	6.4535	199	chr6:124913793-124917775-	25.7728	3.51965e-07	1.3943e-05	down	NA	novel	NM_026988	Ptms	sense overlapping	3983
chr18	34476241	34476620	diffreps_peak_00067076	5.92996	379	chr18:34454034-34491112-	96.7	1.17501e-06	3.60628e-05	down	NA	novel	NM_146084	Fam13b	sense overlapping	37079
chrX	159803719	159803823	diffreps_peak_00157098	6.86626	104	chrX:159764012-159816706+	2.10158	1.36062e-07	6.68333e-06	down	NA	novel	NM_021389	Sh3kbp1	exonic	358
chr19	26749861	26749947	diffreps_peak_00072560	5.42086	86	chr19:26749852-26752041+	2.17957	3.79434e-06	9.23948e-05	down	NA	novel	NM_026003	Smarca2	exonic	349
chr2	6677961	6678280	diffreps_peak_00075315	8.44897	319	chr2:6664115-6747946-	3.7882	3.55655e-09	5.09318e-07	down	NA	novel	NM_010160	Celf2	sense overlapping	83832
chr6	99433761	99434060	diffreps_peak_00121325	6.94122	299	chr6:99428789-99435345-	109.9	1.14492e-07	5.82486e-06	down	mmu_circ_0001498	circBase	NM_053202	Foxp1	sense overlapping	6557
chr2	32821834	32821916	diffreps_peak_00077540	5.98321	82	chr2:32814879-32823585-	2.29404	1.03941e-06	3.26591e-05	down	2_32679105_32670399_-8706|18.30|2|3	PMID:25714049	NM_009295	Stxbp1	exonic	541
chr13	42813581	42813662	diffreps_peak_00036670	8.10942	81	chr13:42813470-42813662-	3.05089	7.77292e-09	8.68531e-07	down	NA	novel	NM_001005740	Phactr1	antisense	193
chr12	29826865	29827000	diffreps_peak_00030146	5.81235	135	chr12:29811373-29827831+	2.76522	1.54046e-06	4.46637e-05	down	12_30512696_30496238_-16458|13.72|2|3	PMID:25714049	NM_008666	Myt1l	exonic	1328
chr11	86665776	86665878	diffreps_peak_00024177	6.53298	102	chr11:86602008-86665878-	2.0451	2.93104e-07	1.21613e-05	down	NA	novel	NM_029478	Vmp1	exonic	1000
chr2	32823535	32823585	diffreps_peak_00077542	5.07505	50	chr2:32814879-32823585-	2.57977	8.41301e-06	0.000173289	down	2_32679105_32670399_-8706|18.30|2|3	PMID:25714049	NM_009295	Stxbp1	exonic	541
chrY	90745701	90745960	diffreps_peak_00157582	7.44557	259	chrY:90736914-90819638+	117.7	3.58453e-08	2.47496e-06	down	NA	novel	NM_133362	Erdr1	sense overlapping	82725
chr14	70613081	70613420	diffreps_peak_00044305	9.38121	339	chr14:70612668-70613420+	2.01985	4.15711e-10	1.11979e-07	down	NA	novel	NM_013514	Dmtn	antisense	753
chr5	37291190	37291380	diffreps_peak_00107556	6.0538	190	chr5:37291191-37291384-	2.15951	8.83478e-07	2.86152e-05	down	NA	novel	ENSMUST00000114154	Evc	intronic	194
chr15	83792081	83792258	diffreps_peak_00050596	7.14031	177	chr15:83791954-83800184+	2.29801	7.23926e-08	4.10464e-06	down	mmu_circ_0000630	circBase	NM_172610	Mpped1	exonic	487
chr13	34077921	34078180	diffreps_peak_00036334	10.4667	259	chr13:34075084-34128212-	2.04837	3.41421e-11	1.96535e-08	down	NA	novel	NM_009450	Tubb2a	sense overlapping	53129
chr10	69990801	69990878	diffreps_peak_00012881	5.98311	77	chr10:69990687-69990878+	2.15806	1.03965e-06	3.26617e-05	down	NA	novel	ENSMUST00000047061	Ank3	intronic	192
chr18	22374221	22374620	diffreps_peak_00066294	5.89952	399	chr18:22366612-22434675+	89.9	1.26032e-06	3.81329e-05	down	18_22593176_22525113_-68063|19.77|5|5	PMID:25714049	NM_001167777	Asxl3	sense overlapping	68064
chr10	108624381	108624680	diffreps_peak_00016012	5.05799	299	chr10:108620850-108642398-	76.4	8.75007e-06	0.000178955	down	NA	novel	NM_009306	Syt1	sense overlapping	21549
chr9	47797502	47797740	diffreps_peak_00147756	5.94098	238	chr9:47797503-47799472+	2.20597	1.14558e-06	3.53394e-05	down	NA	novel	NM_018770	Cadm1	sense overlapping	1970
chr11	79620466	79620555	diffreps_peak_00023552	7.07821	89	chr11:79619629-79620555+	2.21211	8.35194e-08	4.56045e-06	down	11_79434057_79433131_-926|21.09|12|41	PMID:25714049	NM_175543	Rab11fip4	exonic	177
chr7	44353881	44354065	diffreps_peak_00127839	7.6594	184	chr7:44353751-44354065+	2.14676	2.1908e-08	1.73677e-06	down	NA	novel	NM_001034115	Shank1	sense overlapping	315
chr5	23774941	23775320	diffreps_peak_00105966	6.07664	379	chr5:23748728-23778439-	9.55414	8.38228e-07	2.74227e-05	down	NA	novel	NM_178403	Pus7	sense overlapping	29712
chr2	163862877	163863113	diffreps_peak_00085175	6.20486	236	chr2:163862878-163863113-	2.58472	6.23943e-07	2.19131e-05	down	NA	novel	ENSMUST00000044734	Rims4	sense overlapping	236
chrX	159482077	159482376	diffreps_peak_00157060	6.88413	299	chrX:159462114-159483086+	2.27515	1.30577e-07	6.4721e-06	down	X_155921018_155900046_-20972|15.92|13|55	PMID:25714049	NM_001081124	Map7d2	exonic	793
chr14	28011635	28011773	diffreps_peak_00041686	6.35166	138	chr14:28011636-28025173+	2.01524	4.44984e-07	1.67751e-05	down	NA	novel	NM_177814	Erc2	exonic	420
chr6	60815841	60816040	diffreps_peak_00119165	6.25398	199	chr6:60815728-60818365-	2.49373	5.57213e-07	2.00506e-05	down	NA	novel	NM_009221	Snca	sense overlapping	2638
chr5	135041930	135042004	diffreps_peak_00114300	10.4452	74	chr5:135041931-135049104+	2.75341	3.58726e-11	2.0216e-08	down	5_135524974_135517801_-7173|14.67|3|3	PMID:25714049	NM_016801	Stx1a	exonic	506
chr15	98805043	98805224	diffreps_peak_00052082	7.34928	181	chr15:98805044-98805224-	2.63734	4.4742e-08	2.90798e-06	down	NA	novel	NM_001013741	Ddn	sense overlapping	181
chr12	109559927	109559940	diffreps_peak_00034326	5.54756	13	chr12:109559928-109560104+	2.70569	2.83425e-06	7.30125e-05	down	NA	novel	uc007pat.2	Meg3	intronic	177
chr16	4763921	4764300	diffreps_peak_00053062	6.60462	379	chr16:4762559-4774005+	4.2433	2.48533e-07	1.07201e-05	down	NA	novel	NM_010443	Hmox2	sense overlapping	11447
chr13	83592777	83592900	diffreps_peak_00038767	5.3355	123	chr13:83575535-83592981+	2.32839	4.61845e-06	0.000107563	down	mmu_circ_0004829	circBase	uc007rih.2	Mef2c	exonic	400
chr11	98348775	98349165	diffreps_peak_00025451	6.39068	390	chr11:98348776-98349165+	2.38161	4.06747e-07	1.56327e-05	down	NA	novel	NM_144828	Ppp1r1b	sense overlapping	390
chr16	33981801	33982160	diffreps_peak_00055462	5.97317	359	chr16:33975331-34054895+	93.5	1.06372e-06	3.32547e-05	down	NA	novel	NM_177357	Kalrn	antisense	79565
chr5	23764701	23765020	diffreps_peak_00105963	8.06065	319	chr5:23748728-23778439-	13.8917	8.69659e-09	9.33069e-07	down	NA	novel	NM_178403	Pus7	sense overlapping	29712
chr9	47799081	47799460	diffreps_peak_00147757	5.8985	379	chr9:47797503-47799472+	2.45324	1.26327e-06	3.81828e-05	down	NA	novel	NM_018770	Cadm1	sense overlapping	1970
chr2	37656521	37656960	diffreps_peak_00078032	6.27138	439	chr2:37580673-37657739-	2.56164	5.35324e-07	1.94184e-05	down	2_37513259_37436193_-77066|17.99|8|9	PMID:25714049	NM_009261	Strbp	sense overlapping	77067
chr19	26679221	26679440	diffreps_peak_00072542	8.21134	219	chr19:26648984-26698424+	6.36398	6.14693e-09	7.36651e-07	down	NA	novel	NM_011416	Smarca2	sense overlapping	49441
chr9	10472238	10472414	diffreps_peak_00144683	5.64389	176	chr9:10472239-10472414-	5.23791	2.27044e-06	6.10258e-05	down	NA	novel	ENSMUST00000160216	Cntn5	intronic	176
chr13	83575534	83575730	diffreps_peak_00038762	5.03766	196	chr13:83575535-83575730+	2.86646	9.16946e-06	0.000186231	down	NA	novel	uc007rih.2	Mef2c	exonic	196
chr1	56831438	56831560	diffreps_peak_00002302	7.74552	122	chr1:56831439-56845731-	2.13069	1.79671e-08	1.51333e-06	down	NA	novel	NM_139146	Satb2	exonic	354
chr6	127724241	127724860	diffreps_peak_00123332	5.15287	619	chr6:127719269-127732820-	2.15266	7.03277e-06	0.000151144	down	NA	novel	NM_201371	Prmt8	sense overlapping	13552
chr7	127805061	127805560	diffreps_peak_00134394	5.43716	499	chr7:127805044-127805969-	2.78123	3.65456e-06	8.96587e-05	down	NA	novel	AK080153	NA	intronic	926
chr4	44146501	44146820	diffreps_peak_00096090	7.53015	319	chr4:44133640-44187519-	119	2.95016e-08	2.16536e-06	down	NA	novel	NM_175201	Rnf38	sense overlapping	53880
chr4	76961521	76961920	diffreps_peak_00097484	7.02525	399	chr4:76934325-76981539-	5.61053	9.43508e-08	5.01104e-06	down	NA	novel	NM_011211	Ptprd	sense overlapping	47215
chr1	136155821	136156198	diffreps_peak_00006548	5.84679	377	chr1:136152326-136156198+	2.00822	1.42301e-06	4.21286e-05	down	NA	novel	NM_001039472	Kif21b	sense overlapping	3873
chr19	41868481	41869100	diffreps_peak_00073391	6.14936	619	chr19:41865521-41871507-	2.12486	7.08992e-07	2.40469e-05	down	NA	novel	NM_199447	Rrp12	sense overlapping	5987
chr19	41870541	41871507	diffreps_peak_00073392	5.19765	966	chr19:41865521-41871507-	2.18799	6.34381e-06	0.000138683	down	NA	novel	NM_199447	Rrp12	sense overlapping	5987
chr10	108636501	108636920	diffreps_peak_00016016	6.1846	419	chr10:108620850-108642398-	3.05825	6.53736e-07	2.27026e-05	down	NA	novel	NM_009306	Syt1	sense overlapping	21549
chr12	61681801	61682000	diffreps_peak_00031204	7.19474	199	chr12:61669480-61692666+	20.7391	6.3864e-08	3.75214e-06	down	12_62793653_62770467_-23186|11.35|6|6	PMID:25714049	NM_178714	Lrfn5	sense overlapping	23187
chr7	46585241	46585480	diffreps_peak_00128692	5.26754	239	chr7:46567105-46635556-	4.47717	5.40082e-06	0.000121945	down	7_53890926_53822475_-68451|18.11|4|4	PMID:25714049	NM_013789	Sergef	sense overlapping	68452
chr11	50122581	50122750	diffreps_peak_00020075	5.60417	169	chr11:50122571-50122750+	2.15527	2.48791e-06	6.55826e-05	down	NA	novel	NM_001290750	Rnf130	sense overlapping	180
chr9	56701521	56702040	diffreps_peak_00148419	7.1524	519	chr9:56685120-56724345-	8.97085	7.0405e-08	4.02761e-06	down	NA	novel	NM_181074	Lingo1	sense overlapping	39226
chr19	6492835	6493009	diffreps_peak_00071378	8.92848	174	chr19:6481110-6519327+	2.5547	1.17902e-09	2.39695e-07	down	NA	novel	NM_020253	Nrxn2	exonic	2454
chr1	56849901	56850220	diffreps_peak_00002304	5.58674	319	chr1:56831439-56850383+	2.10561	2.58977e-06	6.78316e-05	down	NA	novel	NM_139146	Satb2	antisense	18945
chr7	57816274	57816380	diffreps_peak_00129240	11.189	106	chr7:57788866-57816519+	2.39351	6.47077e-12	8.61062e-09	down	7_65071889_65044236_-27653|16.37|10|18	PMID:25714049	NM_008071	Gabrb3	exonic	619
chr9	111366141	111366780	diffreps_peak_00152333	5.34231	639	chr9:111362258-111377921+	2.10227	4.54666e-06	0.000106096	down	NA	novel	NM_001164659	Trank1	exonic	3788
chr10	3455981	3456300	diffreps_peak_00009866	6.19753	319	chr10:3405685-3463475+	12.2658	6.34558e-07	2.21914e-05	down	NA	novel	NM_133485	Ppp1r14c	sense overlapping	57791
chr10	108629821	108630020	diffreps_peak_00016015	7.46509	199	chr10:108620850-108642398-	11.3665	3.42697e-08	2.39795e-06	down	NA	novel	NM_009306	Syt1	sense overlapping	21549
chr5	134216121	134216480	diffreps_peak_00114106	6.31916	359	chr5:134176400-134256008-	3.70847	4.79559e-07	1.77551e-05	down	NA	novel	NM_010365	Gtf2i	sense overlapping	79609
chr10	108637941	108638520	diffreps_peak_00016017	5.90027	579	chr10:108620850-108642398-	3.18167	1.25814e-06	3.8078e-05	down	NA	novel	NM_009306	Syt1	sense overlapping	21549
chr12	33341920	33342120	diffreps_peak_00030333	5.93271	200	chr12:33341921-33363094+	2.86203	1.16759e-06	3.5878e-05	down	NA	novel	NM_001033436	Atxn7l1	exonic	924
chr5	115172758	115172906	diffreps_peak_00111580	6.23331	148	chr5:115172759-115173224-	2.51465	5.84376e-07	2.0825e-05	down	5_115623233_115622768_-465|18.21|3|3	PMID:25714049	NM_013879	Cabp1	exonic	258
chr5	135045701	135045734	diffreps_peak_00114301	5.27597	33	chr5:135041931-135049104+	2.038	5.29698e-06	0.000120143	down	5_135524974_135517801_-7173|14.67|3|3	PMID:25714049	NM_016801	Stx1a	exonic	506
chr10	43004077	43004180	diffreps_peak_00011692	6.68164	103	chr10:43004078-43021331-	2.66872	2.08141e-07	9.28868e-06	down	NA	novel	NM_175407	Sobp	sense overlapping	17254
chr13	59461996	59462100	diffreps_peak_00038052	7.24643	104	chr13:59460469-59462173-	2.1233	5.66977e-08	3.44672e-06	down	13_59563534_59561830_-1704|12.67|15|42	PMID:25714049	NM_023328	Agtpbp1	exonic	338

## Sheet: Down-OGDR3h_vs_control
Chromosome	Transcript start	Transcript end	Peak ID	Score	Peak length	circRNA	Fold change	P value	FDR	Regulation	circBaseID	Source	Best transcript	Gene name	Catalog	Predicted sequence length
chr5	117998061	117998380	diffreps_peak_00112067	5.09064	319	chr5:117994564-118009243+	8.28662	8.11634e-06	0.000168699	down	NA	novel	NM_145564	Fbxo21	sense overlapping	14680
chr15	71720861	71721160	diffreps_peak_00048724	7.58001	299	chr15:71678579-71727732-	9.67857	2.63018e-08	1.98786e-06	down	NA	novel	NM_177819	Fam135b	sense overlapping	49154
chr9	103162541	103162653	diffreps_peak_00151152	5.93904	112	chr9:103160820-103163903+	2.35337	1.15069e-06	3.54596e-05	down	9_103066233_103063150_-3083|15.34|15|57	PMID:25714049	NM_173781	Rab6b	exonic	366
chr13	52530576	52530752	diffreps_peak_00037396	5.87138	176	chr13:52530577-52530752-	2.99165	1.34469e-06	4.02105e-05	down	NA	novel	NM_001024474	Diras2	sense overlapping	176
chr13	99425234	99425389	diffreps_peak_00039372	5.07024	155	chr13:99425235-99425389-	2.07965	8.50667e-06	0.000174867	down	NA	novel	NM_008634	Map1b	sense overlapping	155
chr8	64822990	64823097	diffreps_peak_00138961	5.68693	107	chr8:64811680-64834568-	2.02115	2.05621e-06	5.65525e-05	down	mmu_circ_0001679	circBase	NM_178633	Klhl2	exonic	355
chr10	108831105	108831171	diffreps_peak_00016043	8.72393	66	chr10:108831106-108902315-	3.24411	1.8883e-09	3.30785e-07	down	10_108339371_108268162_-71209|18.87|3|6	PMID:25714049	NM_009306	Syt1	exonic	167
chr10	127087401	127087506	diffreps_peak_00017138	5.92781	105	chr10:127087234-127087506+	2.20306	1.18084e-06	3.62145e-05	down	NA	novel	NM_001033263	Agap2	exonic	192
chr9	29431921	29432340	diffreps_peak_00146056	6.83069	419	chr9:29411556-29462422-	6.15085	1.47676e-07	7.10895e-06	down	NA	novel	NM_172290	Ntm	sense overlapping	50867
chr4	20652299	20652540	diffreps_peak_00094759	5.1606	241	chr4:20652300-20652636-	7.83957	6.9087e-06	0.000149014	down	NA	novel	ENSMUST00000102998	Nkain3	intronic	337
chr11	81151941	81152400	diffreps_peak_00023748	9.12745	459	chr11:81146081-81159306-	3.61681	7.45675e-10	1.71119e-07	down	NA	novel	ENSMUST00000066197	Asic2	intronic	13226
chr9	29344401	29344548	diffreps_peak_00146033	5.86918	147	chr9:29343521-29344548-	68	1.35152e-06	4.03272e-05	down	9_29152133_29151106_-1027|14.27|13|26	PMID:25714049	ENSMUST00000075069	Ntm	intronic	1028
chr15	71723181	71723580	diffreps_peak_00048725	7.83771	399	chr15:71678579-71727732-	3.34719	1.45309e-08	1.29243e-06	down	NA	novel	NM_177819	Fam135b	sense overlapping	49154
chr9	103566991	103567140	diffreps_peak_00151232	7.12521	149	chr9:103566992-103567176-	9.89062	7.49539e-08	4.20594e-06	down	NA	novel	ENSMUST00000049452	Tmem108	intronic	185
chr13	91972341	91972540	diffreps_peak_00039003	6.17747	199	chr13:91919828-91988039-	84.3	6.64552e-07	2.29925e-05	down	mmu_circ_0004872	circBase	NM_009027	Rasgrf2	sense overlapping	68212
chr10	108629241	108629780	diffreps_peak_00016014	6.15828	539	chr10:108620850-108642398-	2.2325	6.94569e-07	2.36793e-05	down	NA	novel	NM_009306	Syt1	sense overlapping	21549
chr8	65702461	65702980	diffreps_peak_00138978	6.10112	519	chr8:65694851-65721237+	2.97016	7.92281e-07	2.62471e-05	down	NA	novel	ENSMUST00000110258	2022-03-01	intronic	26387
chr8	109912361	109912435	diffreps_peak_00142553	5.73412	74	chr8:109876803-109928655+	11.5316	1.84453e-06	5.16314e-05	down	NA	novel	NM_001122594	Phlpp2	exonic	1982
chr8	58837612	58837770	diffreps_peak_00138773	7.73192	158	chr8:58837613-58837770-	12.2689	1.85387e-08	1.54938e-06	down	NA	novel	ENSMUST00000077447	Galntl6	intronic	158
chr5	150369468	150369572	diffreps_peak_00116230	6.81931	104	chr5:150358799-150378980+	5.70073	1.51595e-07	7.24825e-06	down	5_151181555_151161374_-20181|15.43|2|2	PMID:25714049	NM_172887	Fry	exonic	766
chrX	50605241	50605480	diffreps_peak_00154301	5.77251	239	chrX:50584768-50621132+	71.1	1.68847e-06	4.80511e-05	down	NA	novel	NR_015505	Firre	antisense	36365
chr18	60987646	60987798	diffreps_peak_00068747	5.17557	152	chr18:60987647-60987798+	2.05173	6.67475e-06	0.000144651	down	NA	novel	NM_009792	Camk2a	sense overlapping	152
chr8	66197208	66197300	diffreps_peak_00139020	7.63196	92	chr8:66197209-66197406+	9.84279	2.33366e-08	1.82044e-06	down	NA	novel	ENSMUST00000072482	2022-03-01	intronic	198
chrX	159443649	159444280	diffreps_peak_00157050	6.08797	631	chrX:159443650-159446098+	2.21849	8.16644e-07	2.68804e-05	down	NA	novel	NM_001081124	Map7d2	sense overlapping	2449
chr7	57812053	57812206	diffreps_peak_00129239	5.61022	153	chr7:57788866-57816519+	2.2238	2.45349e-06	6.48089e-05	down	7_65071889_65044236_-27653|16.37|10|18	PMID:25714049	NM_008071	Gabrb3	exonic	619
chr18	38704801	38705200	diffreps_peak_00067732	5.75389	399	chr18:38676718-38739468+	7.31757	1.76243e-06	4.97617e-05	down	NA	novel	ENSMUST00000127448	Arhgap26	sense overlapping	62751
chr13	83628221	83628480	diffreps_peak_00038776	7.39224	259	chr13:83621234-83661619-	7.02252	4.05285e-08	2.71773e-06	down	NA	novel	NM_025282	Mef2c	antisense	40386
chr11	6125121	6125520	diffreps_peak_00018223	6.67397	399	chr11:6108076-6125561-	2.04456	2.1185e-07	9.41323e-06	down	NA	novel	NM_173748	Nudcd3	sense overlapping	17486
chr17	81445486	81445593	diffreps_peak_00065006	6.11134	107	chr17:81388810-81445593-	2.41344	7.73848e-07	2.57941e-05	down	17_81844933_81788150_-56783|18.61|18|123	PMID:25714049	NM_001286684	Slc8a1	exonic	995
chr2	136750601	136751033	diffreps_peak_00082949	5.88005	432	chr2:136749378-136751033+	91.3	1.3181e-06	3.95599e-05	down	NA	novel	ENSMUST00000028727	Snap25	intronic	1656
chr17	74232661	74232980	diffreps_peak_00064655	5.22384	319	chr17:74201057-74245087-	81	5.97253e-06	0.000131989	down	17_74644427_74600397_-44030|11.47|10|17	PMID:25714049	NM_133771	Memo1	sense overlapping	44031
chr15	80117761	80117794	diffreps_peak_00050011	6.60511	33	chr15:80117251-80117794+	3.31062	2.4825e-07	1.07142e-05	down	NA	novel	NM_207708	Syngr1	sense overlapping	544
chr16	72935401	72935780	diffreps_peak_00057314	10.1205	379	chr16:72933213-72935786-	2.60241	7.57642e-11	3.26179e-08	down	NA	novel	NM_019413	Robo1	antisense	2574
chr13	104979661	104980040	diffreps_peak_00039659	5.92842	379	chr13:104951438-104982996-	89.2	1.17917e-06	3.6169e-05	down	NA	novel	NM_029879	Rgs7bp	sense overlapping	31559
chr5	29752396	29752459	diffreps_peak_00106458	6.29093	63	chr5:29748345-29753652+	2.87072	5.1176e-07	1.87174e-05	down	NA	novel	NM_011847	Dnajb6	exonic	375
chr10	79864896	79865280	diffreps_peak_00013859	5.09009	384	chr10:79864897-79865714-	2.54576	8.12657e-06	0.000168815	down	NA	novel	NR_038088	Bc1	intronic	818
chr5	44742581	44743080	diffreps_peak_00107785	7.14854	499	chr5:44740245-44744298-	5.08328	7.10326e-08	4.04797e-06	down	NA	novel	ENSMUST00000070748	Ldb2	intronic	4054
chr4	103929441	103929660	diffreps_peak_00098531	6.39131	219	chr4:103882248-103951993+	101	4.06155e-07	1.56158e-05	down	NA	novel	uc008txu.1	Dab1	sense overlapping	69746
chr5	57917321	57917660	diffreps_peak_00108168	5.62596	339	chr5:57913156-57942262+	16.5	2.36616e-06	6.30546e-05	down	5_58333501_58304395_-29106|18.35|12|61	PMID:25714049	NM_001122758	Pcdh7	sense overlapping	29107
chr9	89603001	89603360	diffreps_peak_00150495	7.93663	359	chr9:89601042-89603394-	41.2826	1.1571e-08	1.12753e-06	down	mmu_circ_0001826	circBase	NM_153509	AF529169	exonic	2353
chr6	119055621	119055840	diffreps_peak_00122539	7.21816	219	chr6:119005038-119057515-	5.60677	6.05111e-08	3.59327e-06	down	6_119007533_118955056_-52477|23.94|2|2	PMID:25714049	NM_009781	Cacna1c	sense overlapping	52478
chr7	46629521	46629960	diffreps_peak_00128699	9.56633	439	chr7:46567105-46635556-	6.68106	2.71438e-10	8.15456e-08	down	7_53890926_53822475_-68451|18.11|4|4	PMID:25714049	NM_013789	Sergef	sense overlapping	68452
chr9	28039421	28039700	diffreps_peak_00145824	7.03998	279	chr9:28039051-28039884+	6.1468	9.12058e-08	4.87876e-06	down	9_27847469_27846636_-833|18.80|3|4	PMID:25714049	ENSMUST00000115243	Opcml	intronic	834
chr12	103133141	103133520	diffreps_peak_00033923	5.46528	379	chr12:103122321-103156560+	9.05732	3.42546e-06	8.53665e-05	down	NA	novel	NM_001081017	Unc79	sense overlapping	34240
chr6	89669061	89669440	diffreps_peak_00120715	9.26017	379	chr6:89650526-89675004+	3.18256	5.49323e-10	1.36449e-07	down	6_89624998_89600520_-24478|17.15|1|2	PMID:25714049	NM_153162	Txnrd3	sense overlapping	24479
chr17	46840761	46840960	diffreps_peak_00062922	5.42866	199	chr17:46809568-46858698-	72.6	3.72679e-06	9.10818e-05	down	NA	novel	NM_001100452	Gltscr1l	sense overlapping	49131
chr8	66112441	66112940	diffreps_peak_00139016	5.90067	499	chr8:66024054-66121899+	4.46008	1.25698e-06	3.80528e-05	down	8_68645798_68547953_-97845|18.24|3|3	PMID:25714049	ENSMUST00000072482	2022-03-01	intronic	97846
chr5	124417421	124417700	diffreps_peak_00113068	5.42759	279	chr5:124373806-124422979-	65	3.73599e-06	9.12521e-05	down	NA	novel	NM_001081203	Sbno1	sense overlapping	49174
chr13	104951461	104951840	diffreps_peak_00039656	6.57296	379	chr13:104951438-104982996-	2.35394	2.67325e-07	1.13562e-05	down	NA	novel	NM_029879	Rgs7bp	sense overlapping	31559
chr13	91554281	91554580	diffreps_peak_00038969	5.55441	299	chr13:91524585-91594723+	82.3	2.78991e-06	7.2115e-05	down	13_91734328_91664190_-70138|16.97|6|6	PMID:25714049	NM_024186	Ssbp2	sense overlapping	70139
chr7	25005750	25005911	diffreps_peak_00126044	7.29052	161	chr7:25005751-25005911-	2.42141	5.12244e-08	3.20533e-06	down	NA	novel	NM_001290469	Atp1a3	sense overlapping	161
chr5	52010621	52010791	diffreps_peak_00108005	5.0237	170	chr5:52010620-52010791-	58.1	9.46892e-06	0.000190874	down	NA	novel	NA	NA	intergenic	172
chr10	108641941	108642398	diffreps_peak_00016019	6.33082	457	chr10:108620850-108642398-	2.85868	4.66858e-07	1.73759e-05	down	NA	novel	NM_009306	Syt1	sense overlapping	21549
chr10	81466049	81466380	diffreps_peak_00014541	5.87755	331	chr10:81466050-81466924-	2.13325	1.32572e-06	3.97335e-05	down	NA	novel	ENSMUST00000118763	Celf5	intronic	875
chr1	164442921	164443256	diffreps_peak_00007806	5.41537	335	chr1:164441575-164443256-	2.11296	3.84263e-06	9.33894e-05	down	NA	novel	NM_009721	Atp1b1	sense overlapping	1682
chr7	99330014	99330169	diffreps_peak_00131787	5.72236	155	chr7:99330015-99330169+	3.00326	1.89513e-06	5.28026e-05	down	NA	novel	ENSMUST00000068973	Map6	intronic	155
chr10	14047221	14047660	diffreps_peak_00010463	5.51594	439	chr10:14004198-14066684+	4.18417	3.04831e-06	7.76772e-05	down	mmu_circ_0002087	circBase	NM_010437	Hivep2	sense overlapping	62487
chr7	99317602	99317779	diffreps_peak_00131780	6.80247	177	chr7:99317603-99317779+	2.23107	1.5759e-07	7.46175e-06	down	NA	novel	ENSMUST00000107100	Map6	intronic	177
chr11	118505622	118506040	diffreps_peak_00028131	6.42045	418	chr11:118505623-118513404+	2.6377	3.79793e-07	1.4836e-05	down	NA	novel	NM_001024931	Rbfox3	antisense	7782
chr15	66255781	66256267	diffreps_peak_00048566	6.43886	486	chr15:66254726-66256267-	3.02534	3.64033e-07	1.43379e-05	down	NA	novel	ENSMUST00000070256	Kcnq3	intronic	1542
chr13	14247281	14247480	diffreps_peak_00035623	5.23899	199	chr13:14230569-14306933-	3.53352	5.76777e-06	0.000128628	down	NA	novel	NM_001081348	Hecw1	sense overlapping	76365
chr2	37935461	37935840	diffreps_peak_00078091	5.19966	379	chr2:37905006-37983105-	68.3	6.31453e-06	0.00013825	down	NA	novel	NM_146122	Dennd1a	sense overlapping	78100
chr17	50673041	50673360	diffreps_peak_00063282	5.36363	319	chr17:50667999-50688027+	64.6	4.32884e-06	0.00010225	down	17_50827352_50807324_-20028|13.13|4|4	PMID:25714049	NM_013880	Plcl2	sense overlapping	20029
chr2	62760541	62760860	diffreps_peak_00079043	6.93893	319	chr2:62702916-62777681-	8.53712	1.15098e-07	5.84987e-06	down	2_62615738_62540973_-74765|17.58|8|13	PMID:25714049	NM_133207	Kcnh7	sense overlapping	74766
chr12	109560021	109560104	diffreps_peak_00034327	6.48933	83	chr12:109559928-109560104+	2.30426	3.24091e-07	1.31099e-05	down	NA	novel	uc007pat.2	Meg3	intronic	177
chr10	79865441	79865714	diffreps_peak_00013860	5.11912	273	chr10:79864897-79865714-	2.00552	7.60122e-06	0.000160969	down	NA	novel	NR_038088	Bc1	intronic	818
chr16	7289381	7289760	diffreps_peak_00053445	5.10822	379	chr16:7285478-7311613+	8.24359	7.79432e-06	0.000164721	down	NA	novel	NM_021477	Rbfox1	sense overlapping	26136
chr12	29827041	29827500	diffreps_peak_00030147	6.47114	459	chr12:29811373-29827831+	2.59531	3.37956e-07	1.35475e-05	down	12_30512696_30496238_-16458|13.72|2|3	PMID:25714049	NM_008666	Myt1l	exonic	1328
chr11	117755861	117756260	diffreps_peak_00027920	5.47698	399	chr11:117732168-117761006+	2.44608	3.3344e-06	8.35748e-05	down	NA	novel	NM_198022	Tnrc6c	sense overlapping	28839
chr6	119599131	119599180	diffreps_peak_00122593	7.20599	49	chr6:119599132-119599317+	114.3	6.22309e-08	3.67675e-06	down	NA	novel	NM_053204	Erc1	antisense	186
chr19	27239844	27239970	diffreps_peak_00072591	5.22822	126	chr19:27230196-27248026+	3.68821	5.91261e-06	0.000130905	down	NA	novel	NM_013703	Vldlr	exonic	2504
chr9	9811021	9811620	diffreps_peak_00144617	6.73629	599	chr9:9743575-9833565-	4.84762	1.8353e-07	8.40076e-06	down	9_9833565_9743575_-89990|11.31|1|3	PMID:25714049	NM_001033359	Cntn5	sense overlapping	89991
chr10	117824561	117824651	diffreps_peak_00016444	6.30975	90	chr10:117824476-117824651-	2.19498	4.90061e-07	1.80559e-05	down	NA	novel	NM_024457	Rap1b	sense overlapping	176
chr1	56891162	56891265	diffreps_peak_00002314	9.27031	103	chr1:56831439-56891265-	2.20636	5.3665e-10	1.34278e-07	down	1_56948109_56888283_-59826|19.48|7|11	PMID:25714049	NM_139146	Satb2	exonic	1143
chrX	159482961	159483086	diffreps_peak_00157061	6.18467	125	chrX:159462114-159483086+	3.17321	6.53629e-07	2.27026e-05	down	X_155921018_155900046_-20972|15.92|13|55	PMID:25714049	NM_001081124	Map7d2	exonic	793
chr7	74511941	74512600	diffreps_peak_00130199	6.82565	659	chr7:74504177-74547081-	5.92123	1.49399e-07	7.17336e-06	down	NA	novel	NM_023908	Slco3a1	sense overlapping	42905
chr13	83642181	83642380	diffreps_peak_00038777	5.84378	199	chr13:83621234-83661619-	92.5	1.4329e-06	4.23662e-05	down	NA	novel	NM_025282	Mef2c	antisense	40386
chrX	157826356	157826540	diffreps_peak_00157008	5.16256	184	chrX:157826357-157834073-	3.4624	6.8776e-06	0.000148468	down	NA	novel	NM_177751	Cnksr2	sense overlapping	7717
chr1	165908221	165908600	diffreps_peak_00007894	6.66255	379	chr1:165875382-165915163-	12.9494	2.17496e-07	9.60757e-06	down	NA	novel	NM_011137	Pou2f1	sense overlapping	39782
chr9	29412341	29412840	diffreps_peak_00146053	6.48326	499	chr9:29411556-29462422-	3.18695	3.28651e-07	1.32474e-05	down	NA	novel	NM_172290	Ntm	sense overlapping	50867
chr4	48614956	48614983	diffreps_peak_00096464	6.4884	27	chr4:48604581-48617331+	2.79915	3.24785e-07	1.31354e-05	down	mmu_circ_0001204	circBase	NM_021436	Tmeff1	exonic	364
chr11	6033841	6034080	diffreps_peak_00018199	7.77442	239	chr11:6015450-6047685-	104	1.68105e-08	1.44079e-06	down	NA	novel	NM_007595	Camk2b	sense overlapping	32236
chr14	28324261	28324540	diffreps_peak_00041713	6.80051	279	chr14:28317249-28384043+	7.28966	1.58304e-07	7.48693e-06	down	14_29197229_29130435_-66794|12.50|13|72	PMID:25714049	ENSMUST00000090302	Erc2	intronic	66795
chr3	82377045	82377460	diffreps_peak_00089708	6.10739	415	chr3:82377046-82379007+	2.12177	7.80918e-07	2.59833e-05	down	NA	novel	NM_001081230	Map9	sense overlapping	1962
chr18	61152184	61152260	diffreps_peak_00068768	5.3815	76	chr18:61152185-61155432-	6.21993	4.15432e-06	9.9571e-05	down	18_61315086_61311839_-3247|20.91|2|2	PMID:25714049	NM_134134	Hmgxb3	exonic	370
chr1	165601081	165601360	diffreps_peak_00007858	5.65855	279	chr1:165593391-165608604-	86.9	2.19509e-06	5.95255e-05	down	1_167538735_167523522_-15213|13.67|4|4	PMID:25714049	NM_001001880	Mpzl1	sense overlapping	15214
chr11	4939454	4939619	diffreps_peak_00017982	6.29582	165	chr11:4939455-4939619-	2.32712	5.06032e-07	1.85476e-05	down	NA	novel	NM_010904	Nefh	sense overlapping	165
chr18	33193981	33194360	diffreps_peak_00066972	6.26016	379	chr18:33187738-33194734+	3.41691	5.49334e-07	1.98367e-05	down	NA	novel	NM_009793	Camk4	sense overlapping	6997
chr9	112184621	112185080	diffreps_peak_00152384	5.97829	459	chr9:112176095-112187766+	2.63703	1.05127e-06	3.29185e-05	down	NA	novel	NM_028755	Arpp21	antisense	11672
chr6	124916441	124916640	diffreps_peak_00123063	6.4535	199	chr6:124913793-124917775-	25.7728	3.51965e-07	1.3943e-05	down	NA	novel	NM_026988	Ptms	sense overlapping	3983
chr18	34476241	34476620	diffreps_peak_00067076	5.92996	379	chr18:34454034-34491112-	96.7	1.17501e-06	3.60628e-05	down	NA	novel	NM_146084	Fam13b	sense overlapping	37079
chrX	159803719	159803823	diffreps_peak_00157098	6.86626	104	chrX:159764012-159816706+	2.10158	1.36062e-07	6.68333e-06	down	NA	novel	NM_021389	Sh3kbp1	exonic	358
chr19	26749861	26749947	diffreps_peak_00072560	5.42086	86	chr19:26749852-26752041+	2.17957	3.79434e-06	9.23948e-05	down	NA	novel	NM_026003	Smarca2	exonic	349
chr2	6677961	6678280	diffreps_peak_00075315	8.44897	319	chr2:6664115-6747946-	3.7882	3.55655e-09	5.09318e-07	down	NA	novel	NM_010160	Celf2	sense overlapping	83832
chr6	99433761	99434060	diffreps_peak_00121325	6.94122	299	chr6:99428789-99435345-	109.9	1.14492e-07	5.82486e-06	down	mmu_circ_0001498	circBase	NM_053202	Foxp1	sense overlapping	6557
chr2	32821834	32821916	diffreps_peak_00077540	5.98321	82	chr2:32814879-32823585-	2.29404	1.03941e-06	3.26591e-05	down	2_32679105_32670399_-8706|18.30|2|3	PMID:25714049	NM_009295	Stxbp1	exonic	541
chr13	42813581	42813662	diffreps_peak_00036670	8.10942	81	chr13:42813470-42813662-	3.05089	7.77292e-09	8.68531e-07	down	NA	novel	NM_001005740	Phactr1	antisense	193
chr12	29826865	29827000	diffreps_peak_00030146	5.81235	135	chr12:29811373-29827831+	2.76522	1.54046e-06	4.46637e-05	down	12_30512696_30496238_-16458|13.72|2|3	PMID:25714049	NM_008666	Myt1l	exonic	1328
chr11	86665776	86665878	diffreps_peak_00024177	6.53298	102	chr11:86602008-86665878-	2.0451	2.93104e-07	1.21613e-05	down	NA	novel	NM_029478	Vmp1	exonic	1000
chr2	32823535	32823585	diffreps_peak_00077542	5.07505	50	chr2:32814879-32823585-	2.57977	8.41301e-06	0.000173289	down	2_32679105_32670399_-8706|18.30|2|3	PMID:25714049	NM_009295	Stxbp1	exonic	541
chrY	90745701	90745960	diffreps_peak_00157582	7.44557	259	chrY:90736914-90819638+	117.7	3.58453e-08	2.47496e-06	down	NA	novel	NM_133362	Erdr1	sense overlapping	82725
chr14	70613081	70613420	diffreps_peak_00044305	9.38121	339	chr14:70612668-70613420+	2.01985	4.15711e-10	1.11979e-07	down	NA	novel	NM_013514	Dmtn	antisense	753
chr5	37291190	37291380	diffreps_peak_00107556	6.0538	190	chr5:37291191-37291384-	2.15951	8.83478e-07	2.86152e-05	down	NA	novel	ENSMUST00000114154	Evc	intronic	194
chr15	83792081	83792258	diffreps_peak_00050596	7.14031	177	chr15:83791954-83800184+	2.29801	7.23926e-08	4.10464e-06	down	mmu_circ_0000630	circBase	NM_172610	Mpped1	exonic	487
chr13	34077921	34078180	diffreps_peak_00036334	10.4667	259	chr13:34075084-34128212-	2.04837	3.41421e-11	1.96535e-08	down	NA	novel	NM_009450	Tubb2a	sense overlapping	53129
chr10	69990801	69990878	diffreps_peak_00012881	5.98311	77	chr10:69990687-69990878+	2.15806	1.03965e-06	3.26617e-05	down	NA	novel	ENSMUST00000047061	Ank3	intronic	192
chr18	22374221	22374620	diffreps_peak_00066294	5.89952	399	chr18:22366612-22434675+	89.9	1.26032e-06	3.81329e-05	down	18_22593176_22525113_-68063|19.77|5|5	PMID:25714049	NM_001167777	Asxl3	sense overlapping	68064
chr10	108624381	108624680	diffreps_peak_00016012	5.05799	299	chr10:108620850-108642398-	76.4	8.75007e-06	0.000178955	down	NA	novel	NM_009306	Syt1	sense overlapping	21549
chr9	47797502	47797740	diffreps_peak_00147756	5.94098	238	chr9:47797503-47799472+	2.20597	1.14558e-06	3.53394e-05	down	NA	novel	NM_018770	Cadm1	sense overlapping	1970
chr11	79620466	79620555	diffreps_peak_00023552	7.07821	89	chr11:79619629-79620555+	2.21211	8.35194e-08	4.56045e-06	down	11_79434057_79433131_-926|21.09|12|41	PMID:25714049	NM_175543	Rab11fip4	exonic	177
chr7	44353881	44354065	diffreps_peak_00127839	7.6594	184	chr7:44353751-44354065+	2.14676	2.1908e-08	1.73677e-06	down	NA	novel	NM_001034115	Shank1	sense overlapping	315
chr5	23774941	23775320	diffreps_peak_00105966	6.07664	379	chr5:23748728-23778439-	9.55414	8.38228e-07	2.74227e-05	down	NA	novel	NM_178403	Pus7	sense overlapping	29712
chr2	163862877	163863113	diffreps_peak_00085175	6.20486	236	chr2:163862878-163863113-	2.58472	6.23943e-07	2.19131e-05	down	NA	novel	ENSMUST00000044734	Rims4	sense overlapping	236
chrX	159482077	159482376	diffreps_peak_00157060	6.88413	299	chrX:159462114-159483086+	2.27515	1.30577e-07	6.4721e-06	down	X_155921018_155900046_-20972|15.92|13|55	PMID:25714049	NM_001081124	Map7d2	exonic	793
chr14	28011635	28011773	diffreps_peak_00041686	6.35166	138	chr14:28011636-28025173+	2.01524	4.44984e-07	1.67751e-05	down	NA	novel	NM_177814	Erc2	exonic	420
chr6	60815841	60816040	diffreps_peak_00119165	6.25398	199	chr6:60815728-60818365-	2.49373	5.57213e-07	2.00506e-05	down	NA	novel	NM_009221	Snca	sense overlapping	2638
chr5	135041930	135042004	diffreps_peak_00114300	10.4452	74	chr5:135041931-135049104+	2.75341	3.58726e-11	2.0216e-08	down	5_135524974_135517801_-7173|14.67|3|3	PMID:25714049	NM_016801	Stx1a	exonic	506
chr15	98805043	98805224	diffreps_peak_00052082	7.34928	181	chr15:98805044-98805224-	2.63734	4.4742e-08	2.90798e-06	down	NA	novel	NM_001013741	Ddn	sense overlapping	181
chr12	109559927	109559940	diffreps_peak_00034326	5.54756	13	chr12:109559928-109560104+	2.70569	2.83425e-06	7.30125e-05	down	NA	novel	uc007pat.2	Meg3	intronic	177
chr16	4763921	4764300	diffreps_peak_00053062	6.60462	379	chr16:4762559-4774005+	4.2433	2.48533e-07	1.07201e-05	down	NA	novel	NM_010443	Hmox2	sense overlapping	11447
chr13	83592777	83592900	diffreps_peak_00038767	5.3355	123	chr13:83575535-83592981+	2.32839	4.61845e-06	0.000107563	down	mmu_circ_0004829	circBase	uc007rih.2	Mef2c	exonic	400
chr11	98348775	98349165	diffreps_peak_00025451	6.39068	390	chr11:98348776-98349165+	2.38161	4.06747e-07	1.56327e-05	down	NA	novel	NM_144828	Ppp1r1b	sense overlapping	390
chr16	33981801	33982160	diffreps_peak_00055462	5.97317	359	chr16:33975331-34054895+	93.5	1.06372e-06	3.32547e-05	down	NA	novel	NM_177357	Kalrn	antisense	79565
chr5	23764701	23765020	diffreps_peak_00105963	8.06065	319	chr5:23748728-23778439-	13.8917	8.69659e-09	9.33069e-07	down	NA	novel	NM_178403	Pus7	sense overlapping	29712
chr9	47799081	47799460	diffreps_peak_00147757	5.8985	379	chr9:47797503-47799472+	2.45324	1.26327e-06	3.81828e-05	down	NA	novel	NM_018770	Cadm1	sense overlapping	1970
chr2	37656521	37656960	diffreps_peak_00078032	6.27138	439	chr2:37580673-37657739-	2.56164	5.35324e-07	1.94184e-05	down	2_37513259_37436193_-77066|17.99|8|9	PMID:25714049	NM_009261	Strbp	sense overlapping	77067
chr19	26679221	26679440	diffreps_peak_00072542	8.21134	219	chr19:26648984-26698424+	6.36398	6.14693e-09	7.36651e-07	down	NA	novel	NM_011416	Smarca2	sense overlapping	49441
chr9	10472238	10472414	diffreps_peak_00144683	5.64389	176	chr9:10472239-10472414-	5.23791	2.27044e-06	6.10258e-05	down	NA	novel	ENSMUST00000160216	Cntn5	intronic	176
chr13	83575534	83575730	diffreps_peak_00038762	5.03766	196	chr13:83575535-83575730+	2.86646	9.16946e-06	0.000186231	down	NA	novel	uc007rih.2	Mef2c	exonic	196
chr1	56831438	56831560	diffreps_peak_00002302	7.74552	122	chr1:56831439-56845731-	2.13069	1.79671e-08	1.51333e-06	down	NA	novel	NM_139146	Satb2	exonic	354
chr6	127724241	127724860	diffreps_peak_00123332	5.15287	619	chr6:127719269-127732820-	2.15266	7.03277e-06	0.000151144	down	NA	novel	NM_201371	Prmt8	sense overlapping	13552
chr7	127805061	127805560	diffreps_peak_00134394	5.43716	499	chr7:127805044-127805969-	2.78123	3.65456e-06	8.96587e-05	down	NA	novel	AK080153	NA	intronic	926
chr4	44146501	44146820	diffreps_peak_00096090	7.53015	319	chr4:44133640-44187519-	119	2.95016e-08	2.16536e-06	down	NA	novel	NM_175201	Rnf38	sense overlapping	53880
chr4	76961521	76961920	diffreps_peak_00097484	7.02525	399	chr4:76934325-76981539-	5.61053	9.43508e-08	5.01104e-06	down	NA	novel	NM_011211	Ptprd	sense overlapping	47215
chr1	136155821	136156198	diffreps_peak_00006548	5.84679	377	chr1:136152326-136156198+	2.00822	1.42301e-06	4.21286e-05	down	NA	novel	NM_001039472	Kif21b	sense overlapping	3873
chr19	41868481	41869100	diffreps_peak_00073391	6.14936	619	chr19:41865521-41871507-	2.12486	7.08992e-07	2.40469e-05	down	NA	novel	NM_199447	Rrp12	sense overlapping	5987
chr19	41870541	41871507	diffreps_peak_00073392	5.19765	966	chr19:41865521-41871507-	2.18799	6.34381e-06	0.000138683	down	NA	novel	NM_199447	Rrp12	sense overlapping	5987
chr10	108636501	108636920	diffreps_peak_00016016	6.1846	419	chr10:108620850-108642398-	3.05825	6.53736e-07	2.27026e-05	down	NA	novel	NM_009306	Syt1	sense overlapping	21549
chr12	61681801	61682000	diffreps_peak_00031204	7.19474	199	chr12:61669480-61692666+	20.7391	6.3864e-08	3.75214e-06	down	12_62793653_62770467_-23186|11.35|6|6	PMID:25714049	NM_178714	Lrfn5	sense overlapping	23187
chr7	46585241	46585480	diffreps_peak_00128692	5.26754	239	chr7:46567105-46635556-	4.47717	5.40082e-06	0.000121945	down	7_53890926_53822475_-68451|18.11|4|4	PMID:25714049	NM_013789	Sergef	sense overlapping	68452
chr11	50122581	50122750	diffreps_peak_00020075	5.60417	169	chr11:50122571-50122750+	2.15527	2.48791e-06	6.55826e-05	down	NA	novel	NM_001290750	Rnf130	sense overlapping	180
chr9	56701521	56702040	diffreps_peak_00148419	7.1524	519	chr9:56685120-56724345-	8.97085	7.0405e-08	4.02761e-06	down	NA	novel	NM_181074	Lingo1	sense overlapping	39226
chr19	6492835	6493009	diffreps_peak_00071378	8.92848	174	chr19:6481110-6519327+	2.5547	1.17902e-09	2.39695e-07	down	NA	novel	NM_020253	Nrxn2	exonic	2454
chr1	56849901	56850220	diffreps_peak_00002304	5.58674	319	chr1:56831439-56850383+	2.10561	2.58977e-06	6.78316e-05	down	NA	novel	NM_139146	Satb2	antisense	18945
chr7	57816274	57816380	diffreps_peak_00129240	11.189	106	chr7:57788866-57816519+	2.39351	6.47077e-12	8.61062e-09	down	7_65071889_65044236_-27653|16.37|10|18	PMID:25714049	NM_008071	Gabrb3	exonic	619
chr9	111366141	111366780	diffreps_peak_00152333	5.34231	639	chr9:111362258-111377921+	2.10227	4.54666e-06	0.000106096	down	NA	novel	NM_001164659	Trank1	exonic	3788
chr10	3455981	3456300	diffreps_peak_00009866	6.19753	319	chr10:3405685-3463475+	12.2658	6.34558e-07	2.21914e-05	down	NA	novel	NM_133485	Ppp1r14c	sense overlapping	57791
chr10	108629821	108630020	diffreps_peak_00016015	7.46509	199	chr10:108620850-108642398-	11.3665	3.42697e-08	2.39795e-06	down	NA	novel	NM_009306	Syt1	sense overlapping	21549
chr5	134216121	134216480	diffreps_peak_00114106	6.31916	359	chr5:134176400-134256008-	3.70847	4.79559e-07	1.77551e-05	down	NA	novel	NM_010365	Gtf2i	sense overlapping	79609
chr10	108637941	108638520	diffreps_peak_00016017	5.90027	579	chr10:108620850-108642398-	3.18167	1.25814e-06	3.8078e-05	down	NA	novel	NM_009306	Syt1	sense overlapping	21549
chr12	33341920	33342120	diffreps_peak_00030333	5.93271	200	chr12:33341921-33363094+	2.86203	1.16759e-06	3.5878e-05	down	NA	novel	NM_001033436	Atxn7l1	exonic	924
chr5	115172758	115172906	diffreps_peak_00111580	6.23331	148	chr5:115172759-115173224-	2.51465	5.84376e-07	2.0825e-05	down	5_115623233_115622768_-465|18.21|3|3	PMID:25714049	NM_013879	Cabp1	exonic	258
chr5	135045701	135045734	diffreps_peak_00114301	5.27597	33	chr5:135041931-135049104+	2.038	5.29698e-06	0.000120143	down	5_135524974_135517801_-7173|14.67|3|3	PMID:25714049	NM_016801	Stx1a	exonic	506
chr10	43004077	43004180	diffreps_peak_00011692	6.68164	103	chr10:43004078-43021331-	2.66872	2.08141e-07	9.28868e-06	down	NA	novel	NM_175407	Sobp	sense overlapping	17254
chr13	59461996	59462100	diffreps_peak_00038052	7.24643	104	chr13:59460469-59462173-	2.1233	5.66977e-08	3.44672e-06	down	13_59563534_59561830_-1704|12.67|15|42	PMID:25714049	NM_023328	Agtpbp1	exonic	338

## Sheet: Up-OGDR1.5h_vs_control
Chromosome	Transcript start	Transcript end	Peak ID	Score	Peak length	circRNA	Fold change	P value	FDR	Regulation	circBaseID	Source	Best transcript	Gene name	Catalog	Predicted sequence length
chr4	149979681	149979715	diffreps_peak_00103956	6.30981	34	chr4:149979566-149979715-	11.5488	4.89989e-07	1.80559e-05	up	NA	novel	NM_173371	H6pd	sense overlapping	150
chr10	84413861	84414100	diffreps_peak_00014897	8.03292	239	chr10:84392256-84422227-	25.6607	9.26993e-09	9.74035e-07	up	NA	novel	NM_001004363	Nuak1	sense overlapping	29972
chr6	55458754	55458930	diffreps_peak_00119040	5.14795	176	chr6:55458755-55458930+	5.47899	7.11292e-06	0.000152583	up	NA	novel	ENSMUST00000070736	Adcyap1r1	intronic	176
chr16	33435541	33435840	diffreps_peak_00055392	6.0137	299	chr16:33434630-33468183+	6.12438	9.68957e-07	3.0771e-05	up	NA	novel	NM_011749	Zfp148	sense overlapping	33554
chr6	145224301	145224580	diffreps_peak_00124137	7.48389	279	chr6:145220617-145234426-	20.1607	3.28176e-08	2.32545e-06	up	NA	novel	NM_021284	Kras	sense overlapping	13810
chr9	37269341	37269540	diffreps_peak_00146647	5.65072	199	chr9:37262382-37304405-	62.2	2.23499e-06	6.0328e-05	up	NA	novel	NM_001081429	Ccdc15	sense overlapping	42024
chr4	149331581	149332040	diffreps_peak_00103847	6.5135	459	chr4:149307429-149387216-	3.6747	3.06549e-07	1.2564e-05	up	NA	novel	NM_008441	Kif1b	sense overlapping	79788
chr2	118814245	118814360	diffreps_peak_00081470	6.53998	115	chr2:118814246-118823786+	2.963	2.88417e-07	1.20232e-05	up	NA	novel	NM_026412	Knstrn	sense overlapping	9541
chr6	28801081	28801420	diffreps_peak_00117158	5.93296	339	chr6:28795845-28874968+	16.8929	1.16692e-06	3.5878e-05	up	NA	novel	NM_019776	Snd1	sense overlapping	79124
chr8	26155041	26155460	diffreps_peak_00137570	10.7459	419	chr8:26154223-26157110-	4.37614	1.79517e-11	1.2853e-08	up	NA	novel	AK029233	NA	sense overlapping	2888
chr4	154528581	154528931	diffreps_peak_00104559	8.28623	350	chr4:154476639-154528931-	3.2544	5.1733e-09	6.48806e-07	up	4_153903040_153850748_-52292|19.99|3|7	PMID:25714049	NM_027504	Prdm16	exonic	398
chr18	80451154	80451320	diffreps_peak_00070230	6.67326	166	chr18:80445886-80460013-	8.656	2.12198e-07	9.42462e-06	up	18_80656752_80642625_-14127|21.18|6|14	PMID:25714049	NM_026295	Ctdp1	exonic	2076
chr4	132368041	132368055	diffreps_peak_00101612	7.63579	14	chr4:132363731-132368055-	3.87117	2.31319e-08	1.8093e-06	up	4_131923970_131919646_-4324|17.51|6|6	PMID:25714049	NM_175306	Phactr4	exonic	272
chr10	4356201	4356285	diffreps_peak_00009908	7.67004	84	chr10:4356112-4356285+	2.64648	2.13776e-08	1.70491e-06	up	NA	novel	NM_031185	Akap12	sense overlapping	174
chrX	93620504	93620860	diffreps_peak_00155270	5.10719	356	chrX:93620505-93626562-	2.24455	7.81284e-06	0.000165058	up	NA	novel	NM_008892	Pola1	sense overlapping	6058
chr14	18574761	18574960	diffreps_peak_00040864	5.8148	199	chr14:18574307-18630431-	58.3	1.53178e-06	4.44367e-05	up	14_19462945_19406821_-56124|17.78|8|17	PMID:25714049	NM_144839	Ube2e2	sense overlapping	56125
chr2	158066901	158067380	diffreps_peak_00084728	6.81092	479	chr2:158035996-158075084+	5.17891	1.54552e-07	7.35701e-06	up	2_157900820_157861732_-39088|15.94|2|2	PMID:25714049	NM_027434	Rprd1b	sense overlapping	39089
chr14	31806881	31807120	diffreps_peak_00042056	6.75708	239	chr14:31778922-31817337-	80.4	1.74954e-07	8.08222e-06	up	14_32630523_32592108_-38415|16.38|5|12	PMID:25714049	NM_001024604	Ankrd28	sense overlapping	38416
chr15	97807621	97808540	diffreps_peak_00051911	6.46407	919	chr15:97795754-97810911-	2.2785	3.43501e-07	1.37111e-05	up	NA	novel	NM_019572	Hdac7	sense overlapping	15158
chr3	27627201	27627720	diffreps_peak_00087683	8.30338	519	chr3:27620605-27643085-	4.4856	4.97302e-09	6.3117e-07	up	NA	novel	NM_173182	Fndc3b	sense overlapping	22481
chr2	120534761	120534960	diffreps_peak_00081703	5.53727	199	chr2:120533511-120535679+	2.08943	2.90219e-06	7.45003e-05	up	NA	novel	ENSMUST00000181963	Gm26899	sense overlapping	2169
chr1	74461565	74461680	diffreps_peak_00003317	5.81767	115	chr1:74444413-74479749-	3.52444	1.52169e-06	4.44367e-05	up	NA	novel	NM_176972	Usp37	exonic	1960
chr14	31489421	31489497	diffreps_peak_00042033	5.93442	76	chr14:31489331-31489497-	24.3939	1.163e-06	3.57931e-05	up	NA	novel	uc007sxr.1	Mettl6	intronic	167
chr15	25803262	25803386	diffreps_peak_00046823	8.00507	124	chr15:25795683-25806679+	4.18851	9.884e-09	1.0204e-06	up	NA	novel	NM_019472	Myo10	exonic	1413
chr3	34455021	34455360	diffreps_peak_00088181	10.9362	339	chr3:34454075-34455590+	5.57386	1.15814e-11	1.04065e-08	up	NA	novel	ENSMUST00000172560	Sox2ot	intronic	1516
chrM	3821	5240	diffreps_peak_00153226	6.36392	1419	chrM:1267-14867+	2.24337	4.32592e-07	1.64166e-05	up	NA	novel	uc009vew.1	AK018753	sense overlapping	13601
chr16	46437701	46438068	diffreps_peak_00056575	9.47652	367	chr16:46436354-46438068+	6.25776	3.33797e-10	9.66159e-08	up	NA	novel	NM_021496	Pvrl3	antisense	1715
chr2	150636901	150637440	diffreps_peak_00083538	10.3866	539	chr2:150625766-150644241-	3.23344	4.10612e-11	2.1856e-08	up	NA	novel	NM_080575	Acss1	sense overlapping	18476
chr18	36673327	36673629	diffreps_peak_00067409	6.43837	302	chr18:36673328-36673629-	2.38329	3.64441e-07	1.43512e-05	up	NA	novel	ENSMUST00000001415	Apbb3	intronic	302
chr17	24226501	24226602	diffreps_peak_00060018	7.1907	101	chr17:24224908-24226783-	5.35926	6.4461e-08	3.77784e-06	up	17_24363728_24361853_-1875|18.90|3|4	PMID:25714049	NM_007634	Ccnf	exonic	398
chr4	59218041	59218380	diffreps_peak_00096939	5.30202	339	chr4:59207761-59220389+	61.1	4.9886e-06	0.000114505	up	NA	novel	NM_011673	Ugcg	sense overlapping	12629
chr7	16539281	16539520	diffreps_peak_00125334	6.34469	239	chr7:16495622-16561975-	16.1587	4.52175e-07	1.69681e-05	up	NA	novel	NM_172739	Arhgap35	sense overlapping	66354
chr14	14049581	14049780	diffreps_peak_00040666	5.09919	199	chr14:13995007-14053023+	51	7.95805e-06	0.000166106	up	14_14885537_14827521_-58016|18.94|5|10	PMID:25714049	NM_139227	Atxn7	sense overlapping	58017
chr2	177182101	177182480	diffreps_peak_00086367	8.41019	379	chr2:177159100-177238501-	28.2143	3.88871e-09	5.40639e-07	up	NA	novel	uc029ujb.1	AK078446	sense overlapping	79402
chr2	45020841	45021040	diffreps_peak_00078357	5.09009	199	chr2:45017397-45022911-	2.67215	8.12662e-06	0.000168815	up	NA	novel	NM_015753	Zeb2	sense overlapping	5515
chr11	107345081	107345340	diffreps_peak_00026721	5.09919	259	chr11:107337412-107345799-	51	7.95805e-06	0.000166106	up	NA	novel	NM_145823	Pitpnc1	sense overlapping	8388
chr7	65311003	65311120	diffreps_peak_00129781	6.03993	117	chr7:65311004-65342719-	2.21084	9.12153e-07	2.93399e-05	up	NA	novel	NM_009386	Tjp1	exonic	3990
chr8	11363541	11363900	diffreps_peak_00136337	6.3696	359	chr8:11313455-11398690+	65.1	4.26972e-07	1.62244e-05	up	NA	novel	NM_009932	Col4a2	sense overlapping	85236
chr12	91325501	91325720	diffreps_peak_00033292	6.79545	219	chr12:91289076-91366504-	2.75153	1.60157e-07	7.55015e-06	up	NA	novel	NM_181815	Cep128	sense overlapping	77429
chr2	150641921	150642220	diffreps_peak_00083539	7.12657	299	chr2:150625766-150644241-	7.59242	7.47182e-08	4.19965e-06	up	NA	novel	NM_080575	Acss1	sense overlapping	18476
chr7	116180401	116180498	diffreps_peak_00133147	6.96487	97	chr7:116175712-116189353-	11.9241	1.08425e-07	5.57429e-06	up	NA	novel	NM_001305185	Plekha7	exonic	475
chr3	135240947	135241106	diffreps_peak_00093080	7.9058	159	chr3:135237503-135241106+	4.47421	1.24222e-08	1.18562e-06	up	NA	novel	NM_173762	Cenpe	exonic	1095
chr2	27989081	27989175	diffreps_peak_00076632	6.20435	94	chr2:27980491-27989175+	12.6032	6.24667e-07	2.19235e-05	up	NA	novel	NM_015734	Col5a1	sense overlapping	8685
chr18	5767081	5767300	diffreps_peak_00065804	8.13509	219	chr18:5705043-5773094+	2.82934	7.32673e-09	8.36459e-07	up	18_5773092_5705041_-68051|13.10|7|16	PMID:25714049	NM_011546	Zeb1	sense overlapping	68052
chr8	119931848	119931917	diffreps_peak_00143361	5.87973	69	chr8:119931849-119942138+	2.62384	1.31908e-06	3.95687e-05	up	8_122466038_122455749_-10289|17.21|13|27	PMID:25714049	NM_009462	Usp10	exonic	1156
chr1	68527781	68528120	diffreps_peak_00002982	6.42673	339	chr1:68513445-68603883-	5.83806	3.74347e-07	1.46624e-05	up	NA	novel	NM_010154	Erbb4	sense overlapping	90439
chr17	70994561	70994860	diffreps_peak_00064550	8.95723	299	chr17:70977048-70996271-	2.14552	1.1035e-09	2.28883e-07	up	NA	novel	NM_023402	Myl12b	sense overlapping	19224
chr2	158050261	158051480	diffreps_peak_00084725	6.37879	1219	chr2:158035996-158075084+	2.16198	4.18037e-07	1.59916e-05	up	2_157900820_157861732_-39088|15.94|2|2	PMID:25714049	NM_027434	Rprd1b	sense overlapping	39089
chr8	79142381	79142660	diffreps_peak_00140213	7.34411	279	chr8:79118175-79180211-	3.25394	4.52787e-08	2.92965e-06	up	NA	novel	NM_178267	Zfp827	antisense	62037
chr17	46574271	46574440	diffreps_peak_00062813	5.389	169	chr17:46571603-46574475-	2.32806	4.08323e-06	9.81312e-05	up	NA	novel	NM_175168	Ptk7	exonic	674
chr7	62044021	62044360	diffreps_peak_00129525	6.03691	339	chr7:61974996-62070616-	16.1017	9.18525e-07	2.95217e-05	up	7_69215502_69119882_-95620|17.18|4|7	PMID:25714049	NR_015599	A330076H08Rik	sense overlapping	95621
chr1	34195941	34196061	diffreps_peak_00001139	9.80521	120	chr1:34187972-34196061+	3.66869	1.56601e-10	5.40266e-08	up	1_34252906_34244817_-8089|15.37|5|5	PMID:25714049	NM_134448	Dst	exonic	6042
chr18	75236001	75236360	diffreps_peak_00069722	5.12716	359	chr18:75162467-75243398+	7.05806	7.46178e-06	0.000158705	up	NA	novel	NM_027727	Dym	sense overlapping	80932
chr11	60140701	60141000	diffreps_peak_00021113	5.90544	299	chr11:60140241-60144505+	3.88766	1.24326e-06	3.77532e-05	up	NA	novel	NM_009021	Rai1	sense overlapping	4265
chr3	51544621	51544920	diffreps_peak_00088602	5.36729	299	chr3:51542780-51550359-	61.6	4.29248e-06	0.000102071	up	NA	novel	NM_080793	Setd7	sense overlapping	7580
chr8	72670903	72670980	diffreps_peak_00139941	8.4824	77	chr8:72666610-72672346+	7.65957	3.29304e-09	4.85556e-07	up	NA	novel	NM_176940	Nwd1	exonic	1634
chr8	54804535	54804690	diffreps_peak_00138651	7.37214	155	chr8:54804536-54804690+	3.0127	4.24483e-08	2.80908e-06	up	NA	novel	NM_001253754	Gpm6a	intronic	155
chr1	24614553	24614795	diffreps_peak_00000829	5.32744	242	chr1:24614554-24614795-	4.62402	4.70498e-06	0.000109106	up	NA	novel	uc007ams.1	Atpase6	sense overlapping	242
chr1	191369561	191370580	diffreps_peak_00009643	7.19999	1019	chr1:191368641-191372666+	3.26756	6.30976e-08	3.7167e-06	up	NA	novel	NM_144880	Ppp2r5a	antisense	4026
chr10	84397941	84398880	diffreps_peak_00014888	7.25227	939	chr10:84392256-84422227-	2.07508	5.5941e-08	3.41557e-06	up	NA	novel	NM_001004363	Nuak1	sense overlapping	29972
chr2	92257341	92257540	diffreps_peak_00080323	5.15597	199	chr2:92186551-92270332+	55	6.98281e-06	0.000150217	up	NA	novel	NM_138755	Phf21a	sense overlapping	83782
chr10	12720818	12720942	diffreps_peak_00010359	7.69331	124	chr10:12697989-12720942-	2.45357	2.02625e-08	1.64709e-06	up	NA	novel	NM_011682	Utrn	exonic	1264
chr2	37949221	37949580	diffreps_peak_00078097	7.19757	359	chr2:37905006-37983105-	18.8929	6.34502e-08	3.73318e-06	up	NA	novel	NM_146122	Dennd1a	sense overlapping	78100
chr7	65959121	65959309	diffreps_peak_00129847	5.34482	188	chr7:65910202-65963004+	3.96146	4.52044e-06	0.000105628	up	NA	novel	NM_011048	Pcsk6	exonic	1007
chr7	73484408	73484560	diffreps_peak_00130099	6.50796	152	chr7:73475344-73491424-	4.13245	3.10484e-07	1.26822e-05	up	NA	novel	NM_001081345	Chd2	exonic	1008
chr2	35127304	35127440	diffreps_peak_00077841	6.05298	136	chr2:35111555-35140621+	3.31444	8.85153e-07	2.86468e-05	up	NA	novel	NM_012018	Cntrl	exonic	2371
chr1	39905761	39906015	diffreps_peak_00001715	6.97952	254	chr1:39903868-39906015+	2.79317	1.0483e-07	5.43991e-06	up	NA	novel	ENSMUST00000163854	Map4k4	intronic	2148
chr10	25471418	25471480	diffreps_peak_00010869	5.42719	62	chr10:25441573-25495591+	2.84946	3.73945e-06	9.1304e-05	up	NA	novel	NM_013511	Epb4.1l2	exonic	2006
chr4	9601306	9601363	diffreps_peak_00094428	7.93675	57	chr4:9537679-9604629-	2.28793	1.15679e-08	1.12753e-06	up	4_9531776_9464826_-66950|13.97|3|3	PMID:25714049	NM_023066	Asph	exonic	578
chr7	116181173	116181285	diffreps_peak_00133148	8.29567	112	chr7:116175712-116189353-	3.44162	5.06205e-09	6.38763e-07	up	NA	novel	NM_001305185	Plekha7	exonic	475
chr9	21393661	21393860	diffreps_peak_00145313	5.29907	199	chr9:21387700-21425256+	7.95413	5.02258e-06	0.000115047	up	NA	novel	NM_007871	Dnm2	sense overlapping	37557
chr10	84401621	84401960	diffreps_peak_00014891	8.32166	339	chr10:84392256-84422227-	13.3953	4.76808e-09	6.18814e-07	up	NA	novel	NM_001004363	Nuak1	sense overlapping	29972
chr13	15648520	15648722	diffreps_peak_00035687	9.8226	202	chr13:15641069-15662530+	2.72174	1.50454e-10	5.25248e-08	up	13_15754363_15732902_-21461|19.61|2|2	PMID:25714049	NM_008130	Gli3	exonic	1024
chr10	103214981	103215440	diffreps_peak_00015839	7.12627	459	chr10:103170421-103221459-	3.33975	7.47697e-08	4.19981e-06	up	NA	novel	NM_001163559	Lrriq1	exonic	3364
chr4	70364006	70364130	diffreps_peak_00097300	7.39925	124	chr4:70307195-70380301-	2.18439	3.98793e-08	2.68739e-06	up	NA	novel	NM_145990	Cdk5rap2	exonic	1520
chr8	85912121	85912500	diffreps_peak_00141105	7.39685	379	chr8:85894816-85922242+	8.66508	4.01007e-08	2.69964e-06	up	NA	novel	NM_199446	Phkb	sense overlapping	27427
chr5	103565114	103565200	diffreps_peak_00110131	8.47384	86	chr5:103559137-103582776+	7.60784	3.35864e-09	4.90943e-07	up	NA	novel	NM_011204	Ptpn13	exonic	2092
chr2	59772121	59772539	diffreps_peak_00078908	7.12395	418	chr2:59771132-59772539-	6.14451	7.51704e-08	4.21347e-06	up	NA	novel	NM_198294	Tanc1	antisense	1408
chr7	28184281	28184527	diffreps_peak_00126722	6.25587	246	chr7:28183064-28184527+	2.0446	5.54792e-07	1.9981e-05	up	7_28969546_28968083_-1463|17.81|3|4	PMID:25714049	NM_010092	Dyrk1b	exonic	435
chr4	8751323	8753120	diffreps_peak_00094361	9.75992	1797	chr4:8751324-8753148+	3.00446	1.73812e-10	5.84872e-08	up	4_8680295_8678471_-1824|20.33|6|12	PMID:25714049	NM_001277149	Chd7	exonic	1825
chr17	86249081	86249280	diffreps_peak_00065282	10.4751	199	chr17:86246230-86250977+	4.67399	3.34857e-11	1.93845e-08	up	NA	novel	ENSMUST00000097274	Prkce	intronic	4748
chr6	22925829	22925895	diffreps_peak_00117030	10.7954	66	chr6:22925830-23000199+	2.19276	1.60191e-11	1.22837e-08	up	6_22950199_22875830_-74369|14.03|7|7	PMID:25714049	uc012eim.1	Ptprz1	exonic	2229
chr15	58122461	58122602	diffreps_peak_00048198	5.67223	141	chr15:58116768-58122602-	2.3244	2.127e-06	5.80632e-05	up	15_57954157_57948323_-5834|17.33|2|2	PMID:25714049	NM_027435	Atad2	exonic	598
chr15	102303961	102304145	diffreps_peak_00052690	8.04667	184	chr15:102299803-102304145+	95	8.98116e-09	9.53618e-07	up	mmu_circ_0000652	circBase	NM_001014976	Espl1	exonic	443
chr18	5082782	5082880	diffreps_peak_00065745	8.69455	98	chr18:5063194-5088814+	5.43243	2.02048e-09	3.47357e-07	up	18_5088812_5063192_-25620|20.75|5|5	PMID:25714049	NM_153153	Svil	exonic	1424
chr6	52743401	52743760	diffreps_peak_00118812	7.86371	359	chr6:52742768-52746770+	11.4304	1.36864e-08	1.25328e-06	up	NA	novel	NM_025816	Tax1bp1	sense overlapping	4003
chr3	27137024	27137161	diffreps_peak_00087641	6.26155	137	chr3:27117778-27150180-	9.95098	5.47584e-07	1.97953e-05	up	NA	novel	NM_007900	Ect2	exonic	2267
chrX	96163321	96163780	diffreps_peak_00155414	7.83242	459	chrX:96160196-96166131+	3.01516	1.47087e-08	1.30316e-06	up	NA	novel	NM_010833	Msn	sense overlapping	5936
chr4	53081981	53082143	diffreps_peak_00096592	8.19265	162	chr4:53075131-53086190-	3.37665	6.41721e-09	7.59711e-07	up	NA	novel	NM_013454	Abca1	exonic	1930
chr15	78987891	78987948	diffreps_peak_00049725	7.04319	57	chr15:78987892-79003792+	2.73448	9.05332e-08	4.85165e-06	up	NA	novel	NM_138579	Triobp	exonic	1578
chr12	5009321	5009700	diffreps_peak_00029251	7.31296	379	chr12:4961218-5013984+	3.40289	4.8645e-08	3.08723e-06	up	12_5020790_4968024_-52766|10.90|9|23	PMID:25714049	NM_001099628	Atad2b	sense overlapping	52767
chr8	80784626	80784920	diffreps_peak_00140286	7.34238	294	chr8:80784627-80800395-	2.73224	4.54588e-08	2.93779e-06	up	8_83324294_83308526_-15768|17.58|11|16	PMID:25714049	NM_021356	Gab1	exonic	1516
chr4	126560021	126560220	diffreps_peak_00100632	7.36075	199	chr4:126559208-126563984+	3.43839	4.35765e-08	2.855e-06	up	4_126241228_126236452_-4776|19.74|2|3	PMID:25714049	NM_175554	Clspn	exonic	783
chr2	92201881	92202720	diffreps_peak_00080315	7.52637	839	chr2:92186551-92270332+	4.44839	2.976e-08	2.17731e-06	up	NA	novel	NM_138755	Phf21a	sense overlapping	83782
chr17	28991297	28991420	diffreps_peak_00061029	5.89453	123	chr17:28991298-28992468-	2.31229	1.27487e-06	3.84812e-05	up	17_29129413_29128243_-1170|17.13|3|4	PMID:25714049	NM_134115	Stk38	exonic	175
chr4	132422121	132422540	diffreps_peak_00101621	8.33543	419	chr4:132410750-132506413-	2.58261	4.61919e-09	6.04854e-07	up	NA	novel	NM_026039	Med18	sense overlapping	95664
chr15	58105476	58105662	diffreps_peak_00048194	8.83319	186	chr15:58099711-58111276-	3.9353	1.46828e-09	2.7912e-07	up	NA	novel	NM_027435	Atad2	exonic	1814
chr6	135152820	135152880	diffreps_peak_00123629	5.97307	60	chr6:135152821-135155289-	2.53478	1.06398e-06	3.32577e-05	up	6_135105307_135102839_-2468|17.11|10|26	PMID:25714049	NM_013546	Hebp1	exonic	320
chr9	87225678	87225700	diffreps_peak_00150429	7.92144	22	chr9:87217068-87239933-	9.81481	1.19828e-08	1.15503e-06	up	NA	novel	NM_199316	Cep162	exonic	1796
chr15	86381061	86381500	diffreps_peak_00050988	5.98938	439	chr15:86351654-86393283+	2.72833	1.02475e-06	3.22531e-05	up	NA	novel	NM_145476	Tbc1d22a	sense overlapping	41630
chr15	76048481	76048627	diffreps_peak_00049171	7.60201	146	chr15:76048442-76048627-	2.30052	2.50032e-08	1.91903e-06	up	NA	novel	NM_134089	Scrib	exonic	186
chr4	70380190	70380280	diffreps_peak_00097303	8.11005	90	chr4:70307195-70380301-	2.29526	7.7616e-09	8.68531e-07	up	NA	novel	NM_145990	Cdk5rap2	exonic	1520
chr5	51498033	51498228	diffreps_peak_00107976	8.30037	195	chr5:51490017-51498228-	2.36921	5.00763e-09	6.33758e-07	up	mmu_circ_0012681	circBase	NM_008904	Ppargc1a	exonic	646
chr11	107058301	107058560	diffreps_peak_00026664	7.51371	259	chr11:107047000-107085373-	10.6172	3.06403e-08	2.21952e-06	up	NA	novel	NM_176850	Bptf	sense overlapping	38374
chr8	31830161	31830400	diffreps_peak_00137717	7.46502	239	chr8:31830061-31830888-	8.46667	3.42749e-08	2.39795e-06	up	NA	novel	uc009ljr.1	Nrg1	intronic	828
chr9	37383380	37383454	diffreps_peak_00146662	9.28962	74	chr9:37382356-37383454+	2.40997	5.1331e-10	1.30348e-07	up	9_37191039_37189941_-1098|23.52|15|55	PMID:25714049	NM_175189	Hepacam	exonic	174
chr7	66381601	66381800	diffreps_peak_00129892	6.74087	199	chr7:66381452-66402135-	7.00943	1.81608e-07	8.33326e-06	up	NA	novel	AK135157	NA	intronic	20684
chr19	8999661	9000000	diffreps_peak_00071800	10.2101	339	chr19:8999662-9002115+	2.95057	6.16412e-11	2.884e-08	up	NA	novel	NM_009643	Ahnak	sense overlapping	2454
chr5	113191621	113192196	diffreps_peak_00111222	7.48921	575	chr5:113182054-113192196-	3.2792	3.24187e-08	2.30436e-06	up	NA	novel	NA	NA	intergenic	10143
chr7	127585144	127585261	diffreps_peak_00134280	7.29342	117	chr7:127584821-127585524-	2.84095	5.08841e-08	3.18982e-06	up	NA	novel	NM_001033040	Gm166	exonic	342
chrM	7001	7340	diffreps_peak_00153228	5.88499	339	chrM:1267-14867+	2.18892	1.30318e-06	3.9204e-05	up	NA	novel	uc009vew.1	AK018753	sense overlapping	13601
chr10	52376475	52376631	diffreps_peak_00011927	6.08771	156	chr10:52376476-52376631-	4.28718	8.17119e-07	2.68804e-05	up	NA	novel	ENSMUST00000020008	Gopc	intronic	156
chr4	72134201	72134480	diffreps_peak_00097327	5.66612	279	chr4:72118002-72145420-	11.0562	2.15713e-06	5.86511e-05	up	4_71806454_71779036_-27418|13.48|2|2	PMID:25714049	NM_011599	Tle1	sense overlapping	27419
chr6	128355461	128355900	diffreps_peak_00123413	10.1175	439	chr6:128333833-128359354+	2.37646	7.63019e-11	3.26437e-08	up	NA	novel	ENSMUST00000180586	Gm26770	sense overlapping	25522
chr7	123180539	123180677	diffreps_peak_00133780	8.05011	138	chr7:123179717-123181447+	3.51571	8.91022e-09	9.48543e-07	up	NA	novel	NM_144925	Tnrc6a	exonic	410
chr9	13498501	13498700	diffreps_peak_00144752	7.35145	199	chr9:13497165-13507902+	6.21389	4.45192e-08	2.90013e-06	up	NA	novel	NA	NA	intergenic	10738
chr9	31330981	31331380	diffreps_peak_00146292	5.00159	399	chr9:31325627-31337422+	12.875	9.9634e-06	0.000199508	up	NA	novel	NM_001080817	Prdm10	sense overlapping	11796
chr15	85446341	85446700	diffreps_peak_00050798	8.14587	359	chr15:85393420-85463037+	98.8	7.14712e-09	8.22368e-07	up	NA	novel	NM_016843	Atxn10	sense overlapping	69618
chr11	90657713	90657831	diffreps_peak_00024638	5.9886	118	chr11:90656351-90661889-	2.8566	1.02659e-06	3.23009e-05	up	mmu_circ_0003548	circBase	NM_028011	Tom1l1	exonic	413
chr9	13620961	13621320	diffreps_peak_00144783	10.5659	359	chr9:13619990-13621675+	2.72502	2.71679e-11	1.65206e-08	up	9_13426119_13424434_-1685|21.55|15|32	PMID:25714049	ENSMUST00000159294	Maml2	exonic	1686
chr12	81137964	81138012	diffreps_peak_00032284	11.449	48	chr12:81135776-81152753+	155.5	3.55614e-12	6.25638e-09	up	12_82253740_82236763_-16977|20.25|9|12	PMID:25714049	NM_022316	Smoc1	exonic	286
chr18	6489681	6489980	diffreps_peak_00065839	5.13681	299	chr18:6467056-6493578-	7.28058	7.29774e-06	0.000155993	up	NA	novel	ENSMUST00000115870	Epc1	intronic	26523
chr10	61342318	61342501	diffreps_peak_00012429	5.22608	183	chr10:61339199-61356036-	4.22287	5.94177e-06	0.000131493	up	NA	novel	NM_013753	Pald1	exonic	2300
chr11	88078461	88078555	diffreps_peak_00024351	5.39015	94	chr11:88073057-88078555+	2.40619	4.07236e-06	9.79274e-05	up	mmu_circ_0000309	circBase	NM_016686	Vezf1	exonic	1096
chr11	105259361	105259920	diffreps_peak_00026422	8.07963	559	chr11:105221186-105281368+	17.7758	8.32482e-09	9.09371e-07	up	NA	novel	NM_001112705	Tlk2	sense overlapping	60183
chr4	149222661	149222920	diffreps_peak_00103821	6.63242	259	chr4:149222227-149223408+	19.0208	2.33123e-07	1.01905e-05	up	NA	novel	NM_207682	Kif1b	antisense	1182
chr5	23620181	23620560	diffreps_peak_00105939	7.10801	379	chr5:23540375-23629477-	3.11181	7.79804e-08	4.32918e-06	up	5_23135295_23046193_-89102|16.08|5|5	PMID:25714049	NM_009274	Srpk2	sense overlapping	89103
chr2	18139121	18139320	diffreps_peak_00075820	5.45317	199	chr2:18092769-18146872+	9.72	3.52235e-06	8.73076e-05	up	NA	novel	NM_010804	Mllt10	sense overlapping	54104
chr15	78885255	78885356	diffreps_peak_00049655	5.10254	101	chr15:78881038-78889868+	2.00536	7.897e-06	0.000166106	up	NA	novel	NM_145929	Gga1	exonic	1047
chr8	11325561	11325780	diffreps_peak_00136334	5.29904	219	chr8:11313455-11398690+	7.50862	5.02293e-06	0.000115047	up	NA	novel	NM_009932	Col4a2	sense overlapping	85236
chr15	95948271	95948497	diffreps_peak_00051743	5.82817	226	chr15:95920244-95956021+	2.29566	1.48534e-06	4.36334e-05	up	NA	novel	NM_175344	Ano6	exonic	1148
chr7	5093311	5093386	diffreps_peak_00124790	5.8251	75	chr7:5089919-5097411+	2.29739	1.49588e-06	4.38864e-05	up	mmu_circ_0014189	circBase	NM_010147	Epn1	exonic	1291
chr9	71721595	71721701	diffreps_peak_00149817	7.22528	106	chr9:71705148-71721701-	5.23604	5.9528e-08	3.5596e-06	up	NA	novel	NM_026599	Cgnl1	exonic	706
chr5	142792781	142793160	diffreps_peak_00115551	6.23541	379	chr5:142790064-142793160-	2.93809	5.81555e-07	2.07444e-05	up	NA	novel	NM_178242	Tnrc18	sense overlapping	3097
chr6	128334481	128334880	diffreps_peak_00123408	9.11562	399	chr6:128333833-128359354+	2.42846	7.66264e-10	1.74477e-07	up	NA	novel	ENSMUST00000180586	Gm26770	sense overlapping	25522
chr2	160702721	160702823	diffreps_peak_00084838	6.58888	102	chr2:160670100-160705321+	2.73626	2.57702e-07	1.10358e-05	up	2_160531057_160495836_-35221|18.98|10|11	PMID:25714049	NM_009408	Top1	exonic	1256
chr1	38995861	38996140	diffreps_peak_00001643	7.38855	279	chr1:38994926-38996381+	3.39945	4.08747e-08	2.73187e-06	up	NA	novel	NM_026850	Pdcl3	sense overlapping	1456
chr13	95837823	95837923	diffreps_peak_00039240	9.98123	100	chr13:95763246-95837923-	2.76424	1.04416e-10	4.0542e-08	up	13_96607878_96533201_-74677|17.44|9|23	PMID:25714049	NM_027711	Iqgap2	exonic	257
chr14	75719691	75719800	diffreps_peak_00044494	5.89907	109	chr14:75717109-75727813-	10.6067	1.26162e-06	3.81586e-05	up	NA	novel	NM_177381	Cog3	exonic	531
chr1	39992841	39993260	diffreps_peak_00001757	6.6768	419	chr1:39990198-39999974+	2.40616	2.10475e-07	9.37245e-06	up	NA	novel	NM_008696	Map4k4	sense overlapping	9777
chr2	27986461	27987040	diffreps_peak_00076631	5.66095	579	chr2:27980491-27989175+	4.53709	2.18297e-06	5.92673e-05	up	NA	novel	NM_015734	Col5a1	sense overlapping	8685
chr4	149379941	149380440	diffreps_peak_00103859	5.38205	499	chr4:149307429-149387216-	2.31084	4.14909e-06	9.94573e-05	up	NA	novel	NM_008441	Kif1b	sense overlapping	79788
chr6	128338121	128338320	diffreps_peak_00123409	5.42433	199	chr6:128333833-128359354+	9.98837	3.76416e-06	9.17651e-05	up	NA	novel	ENSMUST00000180586	Gm26770	sense overlapping	25522
chr11	88169564	88169820	diffreps_peak_00024371	6.38733	256	chr11:88169565-88170174+	2.13154	4.09896e-07	1.57242e-05	up	mmu_circ_0000310	circBase	NM_198013	Cuedc1	exonic	610
chr9	41480721	41481000	diffreps_peak_00146831	6.51564	279	chr9:41475006-41528200+	65.4	3.0504e-07	1.25154e-05	up	9_41336283_41283089_-53194|14.31|9|21	PMID:25714049	AK045205	NA	intronic	53195
chr7	101410941	101411047	diffreps_peak_00132121	5.28429	106	chr7:101401433-101411047+	15.2083	5.19648e-06	0.000118164	up	NA	novel	NM_027180	Arap1	sense overlapping	9615
chr16	16037489	16037600	diffreps_peak_00054068	8.38263	111	chr16:16037490-16037709-	13.622	4.14356e-09	5.66462e-07	up	16_16037802_16037583_-219|20.82|4|5	PMID:25714049	NM_146068	Spidr	exonic	220
chr10	120871034	120871151	diffreps_peak_00016707	5.14014	117	chr10:120849976-120871151-	2.88409	7.24204e-06	0.000154995	up	NA	novel	NM_177092	Msrb3	exonic	304
chr10	13130571	13130803	diffreps_peak_00010390	10.2817	232	chr10:13130572-13130803+	2.28171	5.22786e-11	2.58253e-08	up	NA	novel	NM_009538	Plagl1	sense overlapping	232
chr4	149242321	149242580	diffreps_peak_00103828	6.36352	259	chr4:149226263-149245590-	5.95673	4.32997e-07	1.64289e-05	up	NA	novel	NM_008441	Kif1b	sense overlapping	19328
chr6	48597161	48597359	diffreps_peak_00118650	8.84656	198	chr6:48597120-48597359+	3.18389	1.42379e-09	2.74222e-07	up	NA	novel	NM_175099	Repin1	sense overlapping	240
chr10	128251481	128251563	diffreps_peak_00017429	6.23725	82	chr10:128251119-128251563+	2.27231	5.7909e-07	2.06965e-05	up	NA	novel	ENSMUST00000055539	Timeless	intronic	445
chr11	85581161	85581238	diffreps_peak_00024120	5.64401	77	chr11:85531793-85583994+	7.51613	2.26981e-06	6.10186e-05	up	11_85397496_85345295_-52201|21.43|11|14	PMID:25714049	NM_138681	Bcas3	exonic	984
chr9	67031451	67031514	diffreps_peak_00149466	8.88558	63	chr9:67031452-67032541-	2.26916	1.30144e-09	2.57695e-07	up	NA	novel	NM_001164250	Tpm1	exonic	139
chr1	59859521	59859920	diffreps_peak_00002494	8.23755	399	chr1:59842743-59863902+	90.6	5.78701e-09	7.05411e-07	up	NA	novel	NM_007561	Bmpr2	sense overlapping	21160
chr1	24612921	24613072	diffreps_peak_00000828	5.12212	151	chr1:24612922-24613072-	4.95637	7.54883e-06	0.000160091	up	NA	novel	AK141672	NA	antisense	151
chr4	55044641	55044840	diffreps_peak_00096673	5.12755	199	chr4:55007348-55073105+	19.8788	7.45496e-06	0.000158593	up	NA	novel	NM_172867	Zfp462	sense overlapping	65758
chr4	149237261	149237460	diffreps_peak_00103827	10.7437	199	chr4:149226263-149245590-	3.08351	1.80423e-11	1.2853e-08	up	NA	novel	NM_008441	Kif1b	sense overlapping	19328
chr12	76290980	76291117	diffreps_peak_00031899	5.03012	137	chr12:76290981-76297584+	2.57191	9.33005e-06	0.000188893	up	mmu_circ_0004200	circBase	NM_138745	Mthfd1	exonic	470
chr16	43610481	43610740	diffreps_peak_00056402	10.8871	259	chr16:43577030-43610931+	3.66379	1.29695e-11	1.08662e-08	up	NA	novel	NM_019778	Zbtb20	exonic	1957
chr19	7201441	7201700	diffreps_peak_00071570	5.39988	259	chr19:7199477-7204451-	2.09792	3.98213e-06	9.61526e-05	up	NA	novel	NM_134150	Otub1	sense overlapping	4975
chr3	135239756	135239948	diffreps_peak_00093079	6.08761	192	chr3:135237503-135241106+	2.89988	8.17324e-07	2.68804e-05	up	NA	novel	NM_173762	Cenpe	exonic	1095
chr2	113365601	113365820	diffreps_peak_00081266	7.94889	219	chr2:113363836-113365829+	79.8	1.12488e-08	1.10817e-06	up	mmu_circ_0001055	circBase	NM_010230	Fmn1	exonic	1994
chr1	24615334	24615527	diffreps_peak_00000830	7.77554	193	chr1:24615335-24615527-	5.71891	1.67671e-08	1.43767e-06	up	NA	novel	NA	NA	intergenic	193
chr3	27522461	27522760	diffreps_peak_00087670	8.30764	299	chr3:27498777-27538025-	83.2	4.92443e-09	6.29468e-07	up	NA	novel	NM_173182	Fndc3b	sense overlapping	39249
chr1	55695744	55696040	diffreps_peak_00002289	5.33204	296	chr1:55695745-55702133+	2.01975	4.65545e-06	0.000108152	up	mmu_circ_0000042	circBase	NM_001114663	Plcl1	exonic	2679
chr2	77085421	77085800	diffreps_peak_00079723	8.61071	379	chr2:77074836-77173607-	10.8457	2.45069e-09	3.96379e-07	up	2_77011664_76912893_-98771|19.64|9|10	PMID:25714049	NM_001025576	Ccdc141	sense overlapping	98772
chr2	116012201	116012580	diffreps_peak_00081358	5.5812	379	chr2:115994226-116049198-	2.24878	2.62302e-06	6.84749e-05	up	NA	novel	NM_010825	Meis2	sense overlapping	54973
chr15	97806201	97806660	diffreps_peak_00051910	7.2747	459	chr15:97795754-97810911-	2.64113	5.31254e-08	3.29405e-06	up	NA	novel	NM_019572	Hdac7	sense overlapping	15158
chr18	80973481	80973720	diffreps_peak_00070270	9.56508	239	chr18:80969275-80974629-	3.3006	2.72223e-10	8.15456e-08	up	NA	novel	NM_178280	Sall3	sense overlapping	5355
chr9	22105621	22105820	diffreps_peak_00145591	12.3324	199	chr9:22065701-22113943-	194.8	4.65135e-13	2.57788e-09	up	NA	novel	NR_030448	Mir680-2	intronic	48243
chr18	80972281	80972520	diffreps_peak_00070267	6.91012	239	chr18:80969275-80974629-	3.40562	1.22992e-07	6.16998e-06	up	NA	novel	NM_178280	Sall3	sense overlapping	5355
chr10	41521917	41522060	diffreps_peak_00011579	6.46812	143	chr10:41521918-41528770+	2.52905	3.40317e-07	1.36179e-05	up	NA	novel	NM_016898	Cd164	sense overlapping	6853
chr7	81361621	81361809	diffreps_peak_00130709	7.16824	188	chr7:81355875-81372200-	25.2424	6.78825e-08	3.92591e-06	up	mmu_circ_0014435	circBase	NM_007755	Cpeb1	exonic	1022
chr1	165315301	165315620	diffreps_peak_00007843	5.29385	319	chr1:165306178-165321814+	12.8095	5.0833e-06	0.00011608	up	mmu_circ_0000112	circBase	NM_001081126	Gpr161	sense overlapping	15637
chr14	100053481	100053820	diffreps_peak_00045082	5.29905	339	chr14:100022622-100063065-	7.47414	5.02279e-06	0.000115047	up	NA	novel	NM_010636	Klf12	sense overlapping	40444
chr10	81249164	81249260	diffreps_peak_00014429	6.97568	96	chr10:81241995-81249796+	6.33913	1.05759e-07	5.47156e-06	up	mmu_circ_0000189	circBase	NM_001034895	Zfr2	exonic	1690
chr12	100968019	100968040	diffreps_peak_00033734	8.63181	21	chr12:100968020-100968253-	3.28892	2.33448e-09	3.84564e-07	up	NA	novel	ENSMUST00000068411	Ccdc88c	intronic	234
chr11	113188753	113189005	diffreps_peak_00027136	9.05506	252	chr11:113188754-113189005+	8.20085	8.80934e-10	1.94487e-07	up	NA	novel	NR_015556	2610035D17Rik	antisense	252
chr2	180181642	180182040	diffreps_peak_00086751	11.0597	398	chr2:180181643-180182388-	5.57579	8.71527e-12	9.32219e-09	up	NA	novel	NM_001081171	Lama5	sense overlapping	746
chr15	25781361	25781800	diffreps_peak_00046817	6.99242	439	chr15:25778081-25793246+	2.66013	1.01761e-07	5.31301e-06	up	NA	novel	NM_019472	Myo10	exonic	1739
chrM	9301	9680	diffreps_peak_00153230	5.04961	379	chrM:1267-14867+	2.32684	8.92042e-06	0.000181858	up	NA	novel	uc009vew.1	AK018753	sense overlapping	13601
chr2	150632841	150633160	diffreps_peak_00083537	5.35688	319	chr2:150625766-150644241-	2.43252	4.39666e-06	0.000103444	up	NA	novel	NM_080575	Acss1	sense overlapping	18476
chr6	55466881	55467080	diffreps_peak_00119046	5.07412	199	chr6:55465722-55491586+	9.84146	8.431e-06	0.00017363	up	NA	novel	NM_007407	Adcyap1r1	sense overlapping	25865
chr13	45945141	45945360	diffreps_peak_00036928	7.71323	219	chr13:45918888-45956575-	92.9	1.9354e-08	1.60051e-06	up	mmu_circ_0004613	circBase	NM_009124	Atxn1	sense overlapping	37688
chr5	23173801	23174060	diffreps_peak_00105861	5.11121	259	chr5:23173530-23174060+	58.2	7.7409e-06	0.000163673	up	NA	novel	NM_001081231	Lhfpl3	intronic	531
chr1	46241284	46241437	diffreps_peak_00001993	5.8148	153	chr1:46241285-46241437-	58.4	1.53179e-06	4.44367e-05	up	NA	novel	NM_001160386	Dnah7b	antisense	153
chrM	10061	10540	diffreps_peak_00153232	6.2196	479	chrM:1267-14867+	2.6254	6.03112e-07	2.1332e-05	up	NA	novel	uc009vew.1	AK018753	sense overlapping	13601
chr16	43576941	43577240	diffreps_peak_00056394	10.8573	299	chr16:43561713-43577748+	3.66205	1.38885e-11	1.12495e-08	up	16_43577861_43561826_-16035|15.88|11|42	PMID:25714049	NM_019778	Zbtb20	sense overlapping	16036
chr6	115787129	115787269	diffreps_peak_00122166	7.7483	140	chr6:115786876-115793171+	2.21737	1.78523e-08	1.50677e-06	up	NA	novel	NM_025958	Cand2	exonic	2184
chr2	29215941	29216320	diffreps_peak_00076776	5.07069	379	chr2:29207418-29248878-	3.81224	8.4979e-06	0.000174722	up	NA	novel	NM_133500	Ntng2	sense overlapping	41461
chr4	108817581	108817820	diffreps_peak_00099056	5.09919	239	chr4:108816346-108819197-	51.3	7.95809e-06	0.000166106	up	NA	novel	NM_027453	Btf3l4	sense overlapping	2852
chr19	28545621	28546040	diffreps_peak_00072695	7.86079	419	chr19:28530873-28548423-	12.1176	1.37788e-08	1.25328e-06	up	NA	novel	NM_175459	Glis3	sense overlapping	17551
chr4	49671021	49671220	diffreps_peak_00096557	5.66547	199	chr4:49670024-49687734-	66.1	2.16039e-06	5.87163e-05	up	NA	novel	NM_001004025	Ppp3r2	sense overlapping	17711
chr7	49065301	49065520	diffreps_peak_00128798	6.44444	219	chr7:48992875-49088987+	9.41379	3.59387e-07	1.41876e-05	up	NA	novel	ENSMUST00000183659	Nav2	intronic	96113
chr12	81104606	81104772	diffreps_peak_00032283	9.34768	166	chr12:81104607-81106011+	2.94479	4.49076e-10	1.17833e-07	up	mmu_circ_0000397	circBase	NM_022316	Smoc1	exonic	279
chr11	22056081	22056280	diffreps_peak_00018707	6.24905	199	chr11:22053432-22056589-	26.0909	5.63573e-07	2.02403e-05	up	NA	novel	NM_153078	Ehbp1	sense overlapping	3158
chr5	77002401	77002660	diffreps_peak_00109112	8.19938	259	chr5:76997423-77007407+	3.92461	6.31854e-09	7.52376e-07	up	NA	novel	NM_025691	Srp72	sense overlapping	9985
chr15	25778081	25778187	diffreps_peak_00046814	8.12196	106	chr15:25778081-25793246+	2.41356	7.55161e-09	8.53573e-07	up	NA	novel	NM_019472	Myo10	exonic	1739
chr13	58344541	58344760	diffreps_peak_00037937	9.97575	219	chr13:58328856-58354947-	32.0833	1.05743e-10	4.08858e-08	up	13_58456308_58430217_-26091|14.96|3|11	PMID:25714049	NM_175214	Kif27	sense overlapping	26092
chr5	121799561	121799880	diffreps_peak_00112467	5.13983	319	chr5:121797319-121802265+	4.14072	7.24712e-06	0.000155056	up	NA	novel	NM_009125	Atxn2	sense overlapping	4947
chr8	90266381	90266720	diffreps_peak_00141291	6.42217	339	chr8:90257875-90270483+	8.45161	3.78292e-07	1.47943e-05	up	NA	novel	NM_172913	Tox3	antisense	12609
chr10	84409581	84410100	diffreps_peak_00014894	8.19085	519	chr10:84392256-84422227-	2.23788	6.44389e-09	7.62429e-07	up	NA	novel	NM_001004363	Nuak1	sense overlapping	29972
chr9	115279841	115280160	diffreps_peak_00152538	8.91137	319	chr9:115266094-115302541-	129	1.22639e-09	2.46635e-07	up	NA	novel	NM_024222	Stt3b	sense overlapping	36448
chr15	58111141	58111276	diffreps_peak_00048196	9.56368	135	chr15:58099711-58111276-	5.42105	2.73097e-10	8.15815e-08	up	NA	novel	NM_027435	Atad2	exonic	1814
chr11	68064501	68064820	diffreps_peak_00021725	5.44921	319	chr11:68011315-68067960+	54.6	3.55457e-06	8.75733e-05	up	NA	novel	NM_018768	Stx8	sense overlapping	56646
chr8	80791388	80791614	diffreps_peak_00140289	11.363	226	chr8:80784627-80800395-	2.56935	4.33549e-12	6.78214e-09	up	8_83324294_83308526_-15768|17.58|11|16	PMID:25714049	NM_021356	Gab1	exonic	1516
chr6	93745433	93745560	diffreps_peak_00121092	9.09634	127	chr6:93745434-93747374-	2.12743	8.01056e-10	1.8099e-07	up	mmu_circ_0013616	circBase	NM_010367	Magi1	exonic	804
chr13	3883041	3883246	diffreps_peak_00035162	7.61045	205	chr13:3882641-3883246-	2.25599	2.45217e-08	1.88845e-06	up	NA	novel	NM_019671	Net1	sense overlapping	606
chr4	9607796	9607871	diffreps_peak_00094433	7.00072	75	chr4:9583812-9610938-	2.47929	9.98352e-08	5.23782e-06	up	mmu_circ_0001182	circBase	NM_023066	Asph	exonic	576
chr12	119194301	119194680	diffreps_peak_00035133	7.8973	379	chr12:119180303-119222477-	12.8362	1.26679e-08	1.19962e-06	up	NA	novel	NM_177290	Itgb8	sense overlapping	42175
chr2	5987401	5987600	diffreps_peak_00075253	5.22339	199	chr2:5973508-5988472+	8.63793	5.97868e-06	0.000132082	up	NA	novel	NM_001081132	Upf2	sense overlapping	14965
chr12	3496421	3496620	diffreps_peak_00028977	6.46087	199	chr12:3442474-3502368+	2.31665	3.46043e-07	1.38045e-05	up	12_3502368_3442474_-59894|17.28|4|5	PMID:25714049	NM_172421	Asxl2	sense overlapping	59895
chr11	6307581	6307980	diffreps_peak_00018247	6.93609	399	chr11:6307263-6308051+	14.7722	1.15853e-07	5.88217e-06	up	NA	novel	ENSMUST00000003461	Ogdh	intronic	789
chr15	97800421	97800680	diffreps_peak_00051905	6.71174	259	chr15:97795754-97810911-	5.25444	1.94203e-07	8.77562e-06	up	NA	novel	NM_019572	Hdac7	sense overlapping	15158
chr17	35688538	35688560	diffreps_peak_00062143	10.0387	22	chr17:35688539-35690180-	5.60786	9.1468e-11	3.71648e-08	up	17_35827125_35825484_-1641|19.36|2|2	PMID:25714049	NM_007584	Ddr1	exonic	670
chr15	81626337	81626475	diffreps_peak_00050234	10.0464	138	chr15:81600908-81643191+	2.74321	8.98643e-11	3.67577e-08	up	NA	novel	NM_177821	Ep300	exonic	4520
chr15	58181261	58181348	diffreps_peak_00048206	7.36225	87	chr15:58181191-58181348-	16.2679	4.34257e-08	2.84862e-06	up	NA	novel	NM_026346	Fbxo32	sense overlapping	158
chr4	8785601	8785763	diffreps_peak_00094374	11.0705	162	chr4:8751324-8785763+	2.72628	8.50212e-12	9.32219e-09	up	4_8712910_8678471_-34439|19.33|5|14	PMID:25714049	NM_001277149	Chd7	exonic	2247
chr2	115997281	115997560	diffreps_peak_00081355	8.47395	279	chr2:115994226-116049198-	3.54893	3.35778e-09	4.90943e-07	up	NA	novel	NM_010825	Meis2	sense overlapping	54973
chr16	24761592	24761860	diffreps_peak_00054910	5.78956	268	chr16:24761593-24762276+	2.02508	1.62346e-06	4.65302e-05	up	16_24762362_24761679_-683|23.08|3|3	PMID:25714049	NM_178665	Lpp	exonic	684
chr4	149230741	149230960	diffreps_peak_00103824	5.51293	219	chr4:149226263-149245590-	7.33594	3.06954e-06	7.81308e-05	up	NA	novel	NM_008441	Kif1b	sense overlapping	19328
chr18	5073880	5074004	diffreps_peak_00065744	9.44685	124	chr18:5062162-5074004+	4.49609	3.57398e-10	1.01301e-07	up	NA	novel	NM_153153	Svil	exonic	1165
chr4	132412981	132413380	diffreps_peak_00101619	7.87601	399	chr4:132410750-132506413-	3.41233	1.33044e-08	1.23578e-06	up	NA	novel	NM_026039	Med18	sense overlapping	95664
chr11	88052981	88053039	diffreps_peak_00024346	6.56947	58	chr11:88049977-88053039+	4.997	2.69483e-07	1.14218e-05	up	11_87866541_87863479_-3062|20.39|8|9	PMID:25714049	NM_173374	Srsf1	sense overlapping	3063
chr9	14551541	14551920	diffreps_peak_00144857	6.89836	379	chr9:14547690-14575439-	2.16183	1.26368e-07	6.31768e-06	up	9_14379883_14352134_-27749|17.77|5|6	PMID:25714049	NM_001081395	Amotl1	sense overlapping	27750
chr1	34744461	34744860	diffreps_peak_00001207	10.0697	399	chr1:34732109-34745444-	14.1078	8.51794e-11	3.5551e-08	up	NA	novel	uc007apf.1	Arhgef4	antisense	13336
chr5	103784501	103784513	diffreps_peak_00110139	6.53713	12	chr5:103783124-103784513+	5.40909	2.90317e-07	1.208e-05	up	mmu_circ_0011938	circBase	NM_133919	Aff1	exonic	979
chr18	65093561	65093920	diffreps_peak_00069005	5.98138	359	chr18:65074724-65106552+	3.82746	1.0438e-06	3.27572e-05	up	NA	novel	NM_031881	Nedd4l	sense overlapping	31829
chr5	24429839	24430021	diffreps_peak_00106035	9.39705	182	chr5:24429840-24430021+	2.15299	4.00818e-10	1.09708e-07	up	NA	novel	NM_009207	Slc4a2	sense overlapping	182
chr5	23767461	23767840	diffreps_peak_00105965	6.25146	379	chr5:23748728-23778439-	2.45934	5.60448e-07	2.01457e-05	up	NA	novel	NM_178403	Pus7	sense overlapping	29712
chr1	14252427	14252614	diffreps_peak_00000372	7.35839	187	chr1:14208895-14283198-	3.61099	4.38134e-08	2.86504e-06	up	1_14273279_14198976_-74303|16.84|4|4	PMID:25714049	NM_010164	Eya1	exonic	1001
chr3	87977681	87977936	diffreps_peak_00090103	6.91035	255	chr3:87975837-87977936+	2.31586	1.22929e-07	6.16833e-06	up	NA	novel	NM_016701	Nes	sense overlapping	2100
chr15	25779582	25779810	diffreps_peak_00046815	9.03348	228	chr15:25778081-25793246+	2.14424	9.25803e-10	2.01403e-07	up	NA	novel	NM_019472	Myo10	exonic	1739
chr8	80800100	80800220	diffreps_peak_00140291	10.4031	120	chr8:80784627-80800395-	3.73279	3.95275e-11	2.12048e-08	up	8_83324294_83308526_-15768|17.58|11|16	PMID:25714049	NM_021356	Gab1	exonic	1516
chr4	8785061	8785320	diffreps_peak_00094373	7.39386	259	chr4:8783286-8785763+	6.77	4.03774e-08	2.71026e-06	up	NA	novel	NM_001277149	Chd7	sense overlapping	2478
chr4	82330339	82330480	diffreps_peak_00097670	7.6498	141	chr4:82330340-82350449-	2.14575	2.23975e-08	1.76503e-06	up	NA	novel	NM_008687	Nfib	sense overlapping	20110
chr5	35032101	35032300	diffreps_peak_00107181	6.08515	199	chr5:35019343-35032434+	2.52569	8.21968e-07	2.70071e-05	up	NA	novel	ENSMUST00000087684	Rgs12	exonic	2109
chr9	13549540	13549660	diffreps_peak_00144766	8.05622	120	chr9:13549541-13549724+	12.3733	8.78579e-09	9.392e-07	up	NA	novel	NA	NA	intergenic	184
chr16	85043575	85043743	diffreps_peak_00057643	10.6773	168	chr16:85013627-85043743-	2.545	2.10256e-11	1.42202e-08	up	16_85043988_85013872_-30116|17.40|10|10	PMID:25714049	NM_001198823	App	exonic	822
chr12	51731641	51732120	diffreps_peak_00030753	6.50812	479	chr12:51717076-51738764+	7.70303	3.10368e-07	1.268e-05	up	NA	novel	NM_021710	Ap4s1	sense overlapping	21689
chr10	84399681	84400380	diffreps_peak_00014889	7.54565	699	chr10:84392256-84422227-	2.60835	2.84676e-08	2.10682e-06	up	NA	novel	NM_001004363	Nuak1	sense overlapping	29972
chr19	28289081	28289320	diffreps_peak_00072650	5.0777	239	chr19:28262627-28298946-	58.9	8.36187e-06	0.000172426	up	NA	novel	NM_175459	Glis3	sense overlapping	36320
chr5	103564010	103564339	diffreps_peak_00110130	7.94631	329	chr5:103559137-103582776+	2.99964	1.1316e-08	1.11114e-06	up	NA	novel	NM_011204	Ptpn13	exonic	2092
chr9	37382355	37382455	diffreps_peak_00146661	10.3015	100	chr9:37382356-37383454+	2.23895	4.99446e-11	2.50245e-08	up	9_37191039_37189941_-1098|23.52|15|55	PMID:25714049	NM_175189	Hepacam	exonic	174
chr7	130961981	130962177	diffreps_peak_00134660	6.05359	196	chr7:130961513-130962177+	2.11047	8.83907e-07	2.86246e-05	up	NA	novel	NM_019564	Htra1	exonic	305
chr17	65858701	65858940	diffreps_peak_00064082	5.71216	239	chr17:65849915-65859134-	5.68592	1.94019e-06	5.38677e-05	up	NA	novel	NM_009067	Ralbp1	sense overlapping	9220
chr5	122579741	122580080	diffreps_peak_00112670	6.99405	339	chr5:122540304-122611107-	82.9	1.01379e-07	5.29712e-06	up	5_123061116_122990313_-70803|20.00|4|9	PMID:25714049	NM_009879	Ift81	sense overlapping	70804
chr8	11557121	11557740	diffreps_peak_00136410	6.12793	619	chr8:11557003-11562117+	2.46471	7.44853e-07	2.50363e-05	up	NA	novel	NM_011919	Ing1	sense overlapping	5115
chr10	8814161	8814457	diffreps_peak_00010126	7.06204	296	chr10:8780519-8814457+	2.99061	8.66875e-08	4.69803e-06	up	NA	novel	NM_175155	Sash1	antisense	33939
chr2	145258261	145258660	diffreps_peak_00083319	5.37196	399	chr2:145244961-145266974+	21.8485	4.24654e-06	0.000101307	up	2_145092710_145070697_-22013|19.02|2|2	PMID:25714049	ENSMUST00000153249	Slc24a3	intronic	22014
chr5	103783123	103783244	diffreps_peak_00110138	11.0803	121	chr5:103783124-103784513+	3.4476	8.3112e-12	9.32219e-09	up	mmu_circ_0011938	circBase	NM_133919	Aff1	exonic	979
chr19	28531301	28531700	diffreps_peak_00072693	7.73772	399	chr19:28527760-28540408-	2.02601	1.82926e-08	1.53389e-06	up	19_28614898_28602250_-12648|13.15|2|2	PMID:25714049	NM_175459	Glis3	sense overlapping	12649
chr6	33436361	33436560	diffreps_peak_00117626	6.09382	199	chr6:33428901-33442039+	25.0606	8.0572e-07	2.65798e-05	up	mmu_circ_0013296	circBase	NM_009148	Exoc4	sense overlapping	13139
chr2	26060361	26060740	diffreps_peak_00076345	6.74502	379	chr2:26060190-26064618-	2.80462	1.79877e-07	8.26494e-06	up	NA	novel	NM_026495	Nacc2	sense overlapping	4429
chr2	145253481	145253960	diffreps_peak_00083318	8.02757	479	chr2:145244961-145266974+	5.32891	9.385e-09	9.82247e-07	up	2_145092710_145070697_-22013|19.02|2|2	PMID:25714049	ENSMUST00000153249	Slc24a3	intronic	22014
chr5	65786121	65786320	diffreps_peak_00108401	6.97016	199	chr5:65784310-65786361-	5.38439	1.07113e-07	5.5268e-06	up	NA	novel	NM_001024917	N4bp2	antisense	2052
chr9	35031601	35031840	diffreps_peak_00146527	5.13331	239	chr9:34983621-35034252+	12.8958	7.35677e-06	0.00015681	up	NA	novel	NM_026324	Kirrel3	sense overlapping	50632
chr7	45217371	45217500	diffreps_peak_00128286	6.86764	129	chr7:45217372-45218145+	2.23857	1.35633e-07	6.67182e-06	up	NA	novel	NM_011565	Tead2	sense overlapping	774
chr16	67619721	67619943	diffreps_peak_00057174	7.19077	222	chr16:67619719-67619943-	3.0063	6.44514e-08	3.77784e-06	up	NA	novel	ENSMUST00000114292	Cadm2	intronic	225
chr2	118818981	118819220	diffreps_peak_00081473	5.50374	239	chr2:118814246-118823786+	62	3.13519e-06	7.94173e-05	up	NA	novel	NM_026412	Knstrn	sense overlapping	9541
chrM	12361	14140	diffreps_peak_00153234	5.38111	1779	chrM:1267-14867+	2.00844	4.15806e-06	9.9649e-05	up	NA	novel	uc009vew.1	AK018753	sense overlapping	13601
chr16	14125401	14125600	diffreps_peak_00054001	7.38025	199	chr16:14121244-14146089-	28.3056	4.16627e-08	2.77472e-06	up	NA	novel	AK002785	NA	intronic	24846
chr2	26061921	26062280	diffreps_peak_00076346	7.28719	359	chr2:26060190-26064618-	3.39229	5.16196e-08	3.22097e-06	up	NA	novel	NM_026495	Nacc2	sense overlapping	4429
chr7	130219101	130219121	diffreps_peak_00134558	5.79438	20	chr7:130185229-130228792-	6.6	1.60555e-06	4.61072e-05	up	mmu_circ_0013924	circBase	NM_010207	Fgfr2	exonic	985
chr5	113190761	113191040	diffreps_peak_00111221	9.16774	279	chr5:113182054-113192196-	2.79253	6.79612e-10	1.60165e-07	up	NA	novel	NA	NA	intergenic	10143
chr2	83654341	83654740	diffreps_peak_00079891	8.15867	399	chr2:83653358-83664192+	10.2672	6.9396e-09	8.03907e-07	up	2_83504349_83493515_-10834|15.19|12|28	PMID:25714049	NM_026934	Zc3h15	sense overlapping	10835
chr18	75137681	75138020	diffreps_peak_00069714	6.04383	339	chr18:75080203-75151238+	9.76744	9.03998e-07	2.91508e-05	up	NA	novel	NM_027727	Dym	sense overlapping	71036
chr3	34649821	34650920	diffreps_peak_00088262	7.39412	1099	chr3:34638358-34653284-	2.07796	4.03536e-08	2.71026e-06	up	NA	novel	NM_011443	Sox2	antisense	14927
chr19	3876881	3877680	diffreps_peak_00070645	8.89655	799	chr19:3875735-3893557+	4.01024	1.26898e-09	2.53212e-07	up	NA	novel	NM_013490	Chka	sense overlapping	17823
chr19	28572101	28572560	diffreps_peak_00072700	5.82925	459	chr19:28530873-28596212-	2.48125	1.48166e-06	4.3544e-05	up	NA	novel	NM_175459	Glis3	sense overlapping	65340
chr19	28530841	28531060	diffreps_peak_00072692	5.45803	219	chr19:28527760-28540408-	2.14514	3.48313e-06	8.65301e-05	up	19_28614898_28602250_-12648|13.15|2|2	PMID:25714049	NM_175459	Glis3	sense overlapping	12649
chr8	70285393	70285550	diffreps_peak_00139322	7.96339	157	chr8:70285234-70286062+	2.02586	1.08796e-08	1.08651e-06	up	mmu_circ_0014932	circBase	NM_011984	Homer3	exonic	371
chr3	34643081	34643660	diffreps_peak_00088257	7.09499	579	chr3:34638358-34653284-	2.98318	8.03547e-08	4.42887e-06	up	NA	novel	NM_011443	Sox2	antisense	14927
chr8	79129461	79129840	diffreps_peak_00140200	6.11976	379	chr8:79118175-79136663-	6.91045	7.58993e-07	2.53943e-05	up	NA	novel	NM_178267	Zfp827	antisense	18489
chr1	24612689	24612800	diffreps_peak_00000827	7.11022	111	chr1:24612690-24612862+	8.23396	7.75855e-08	4.31228e-06	up	NA	novel	AK141672	NA	sense overlapping	173
chr2	26063601	26063880	diffreps_peak_00076347	5.75264	279	chr2:26060190-26064618-	20.2778	1.76751e-06	4.98637e-05	up	NA	novel	NM_026495	Nacc2	sense overlapping	4429
chr17	65660801	65661060	diffreps_peak_00064028	5.8148	259	chr17:65613220-65667975-	58.2	1.53178e-06	4.44367e-05	up	NA	novel	NM_013933	Vapa	sense overlapping	54756
chr6	116026781	116027060	diffreps_peak_00122221	8.51744	279	chr6:116021426-116043805-	113.2	3.03782e-09	4.60112e-07	up	NA	novel	NM_177412	Tmcc1	sense overlapping	22380
chr12	98688721	98689180	diffreps_peak_00033438	8.26986	459	chr12:98682519-98689628-	2.50266	5.372e-09	6.6922e-07	up	NA	novel	NM_011877	Ptpn21	exonic	1799
chr9	14596450	14596600	diffreps_peak_00144878	5.92608	150	chr9:14592754-14596600-	3.30108	1.18555e-06	3.63422e-05	up	9_14401044_14397198_-3846|16.67|9|17	PMID:25714049	NM_001081395	Amotl1	exonic	1108
chr19	38523681	38524060	diffreps_peak_00073146	9.53377	379	chr19:38506315-38525452+	3.07697	2.92571e-10	8.67667e-08	up	NA	novel	NM_019588	Plce1	sense overlapping	19138
chr11	100958746	100959046	diffreps_peak_00025834	8.70061	300	chr11:100958747-100959046-	3.01256	1.99247e-09	3.43986e-07	up	NA	novel	NM_008986	Ptrf	sense overlapping	300
chr11	107048341	107049040	diffreps_peak_00026651	7.22195	699	chr11:107047000-107085373-	4.29339	5.99865e-08	3.57351e-06	up	NA	novel	NM_176850	Bptf	sense overlapping	38374
chr3	89442581	89442780	diffreps_peak_00090544	7.52016	199	chr3:89439602-89443099+	90.2	3.01881e-08	2.20017e-06	up	NA	novel	ENSMUST00000038942	Pbxip1	intronic	3498
chr7	123181318	123181447	diffreps_peak_00133781	5.62693	129	chr7:123179717-123181447+	2.78157	2.36085e-06	6.29377e-05	up	NA	novel	NM_144925	Tnrc6a	exonic	410
chr5	64333441	64333591	diffreps_peak_00108291	7.05159	150	chr5:64316354-64335437+	8.53571	8.87992e-08	4.78698e-06	up	NA	novel	NM_019636	Tbc1d1	exonic	726
chr18	5747721	5748460	diffreps_peak_00065803	5.47044	739	chr18:5705043-5773094+	2.65484	3.38504e-06	8.45545e-05	up	18_5773092_5705041_-68051|13.10|7|16	PMID:25714049	NM_011546	Zeb1	sense overlapping	68052
chr6	149080981	149081200	diffreps_peak_00124355	7.73784	219	chr6:149068050-149084936-	30.25	1.82876e-08	1.53389e-06	up	6_149033458_149016572_-16886|12.49|13|22	PMID:25714049	NM_177192	Dennd5b	sense overlapping	16887
chr7	134760811	134760937	diffreps_peak_00134887	7.66252	126	chr7:134756877-134789285+	2.5517	2.17512e-08	1.72701e-06	up	7_141980968_141948560_-32408|17.11|3|3	PMID:25714049	NM_001033420	Dock1	exonic	1215
chr10	8784181	8784560	diffreps_peak_00010120	5.90996	379	chr10:8780519-8814457+	2.63767	1.23039e-06	3.74094e-05	up	NA	novel	NM_175155	Sash1	antisense	33939
chr12	85933281	85933674	diffreps_peak_00032917	6.17068	393	chr12:85925640-85939510+	3.31943	6.75031e-07	2.32647e-05	up	12_87280460_87266590_-13870|18.83|4|4	PMID:25714049	NM_001081423	Ttll5	exonic	1041
chr12	91366081	91366500	diffreps_peak_00033301	5.16121	419	chr12:91289076-91366504-	3.55357	6.89911e-06	0.000148854	up	NA	novel	NM_181815	Cep128	sense overlapping	77429
chr13	15641081	15641274	diffreps_peak_00035685	9.89239	193	chr13:15641069-15662530+	3.28942	1.28119e-10	4.68841e-08	up	13_15754363_15732902_-21461|19.61|2|2	PMID:25714049	NM_008130	Gli3	exonic	1024
chr9	114384741	114384867	diffreps_peak_00152456	6.37626	126	chr9:114381586-114384867-	2.99364	4.20472e-07	1.60727e-05	up	NA	novel	NM_019922	Crtap	exonic	301
chr10	25488950	25489093	diffreps_peak_00010878	7.05201	143	chr10:25441573-25495591+	2.30515	8.87132e-08	4.78632e-06	up	NA	novel	NM_013511	Epb4.1l2	exonic	2006
chr10	110259181	110259520	diffreps_peak_00016149	7.20268	339	chr10:110216702-110272828-	8.49265	6.27076e-08	3.70011e-06	up	10_109709884_109653758_-56126|13.24|4|6	PMID:25714049	AK035945	NA	sense overlapping	56127
chr10	121371143	121371203	diffreps_peak_00016734	5.42615	60	chr10:121371144-121374564+	2.81407	3.7484e-06	9.14899e-05	up	NA	novel	NM_029364	Gns	exonic	267
chr18	36647681	36648100	diffreps_peak_00067405	6.95755	419	chr18:36646691-36648740+	2.4737	1.10269e-07	5.64643e-06	up	18_36808394_36806345_-2049|17.58|11|17	PMID:25714049	NM_175375	Ankhd1	exonic	1760
chr11	46268181	46268460	diffreps_peak_00019885	5.14326	279	chr11:46266730-46276817-	9.97059	7.19016e-06	0.000154047	up	NA	novel	NM_133769	Cyfip2	sense overlapping	10088
chr16	20186261	20186480	diffreps_peak_00054526	8.32499	219	chr16:20186251-20203913+	5.2029	4.73166e-09	6.15647e-07	up	NA	novel	NM_001033237	Yeats2	exonic	1053
chr15	77774634	77775169	diffreps_peak_00049490	6.87339	535	chr15:77774635-77775169-	2.20969	1.33849e-07	6.60945e-06	up	NA	novel	NM_022410	Myh9	sense overlapping	535
chrM	3141	3800	diffreps_peak_00153225	5.30642	659	chrM:1267-14867+	2.13839	4.93835e-06	0.000113568	up	NA	novel	uc009vew.1	AK018753	sense overlapping	13601
chr5	43261733	43261784	diffreps_peak_00107715	5.22452	51	chr5:43237307-43261784+	14.2857	5.96322e-06	0.000131854	up	5_43653023_43628546_-24477|13.66|7|10	PMID:25714049	NM_175937	Cpeb2	exonic	514
chr4	72126681	72127000	diffreps_peak_00097326	8.07766	319	chr4:72118002-72145420-	29.875	8.36265e-09	9.10534e-07	up	4_71806454_71779036_-27418|13.48|2|2	PMID:25714049	NM_011599	Tle1	sense overlapping	27419
chr4	8801323	8801465	diffreps_peak_00094375	10.6844	142	chr4:8751324-8801465+	2.61368	2.06806e-11	1.40798e-08	up	mmu_circ_0011823	circBase	NM_001277149	Chd7	exonic	2389
chr4	97975661	97975860	diffreps_peak_00098051	6.69719	199	chr4:97944867-98041679+	73.1	2.00822e-07	9.01564e-06	up	NA	novel	NM_010905	Nfia	sense overlapping	96813
chr15	100405761	100405814	diffreps_peak_00052412	5.01434	53	chr15:100401268-100406386-	3.89205	9.67523e-06	0.000194384	up	15_100236817_100231699_-5118|18.54|4|5	PMID:25714049	NM_008732	Slc11a2	exonic	918
chr2	158009121	158009320	diffreps_peak_00084722	7.58665	199	chr2:158007019-158009358-	11.5812	2.5903e-08	1.96173e-06	up	NA	novel	uc008npj.1	Tti1	exonic	2340
chr5	110658421	110658620	diffreps_peak_00110698	5.96595	199	chr5:110653223-110720843-	3.71987	1.08156e-06	3.37308e-05	up	NA	novel	NM_029337	Ep400	sense overlapping	67621
chr15	25793150	25793246	diffreps_peak_00046822	11.0002	96	chr15:25778081-25793246+	2.77409	9.99574e-12	9.57195e-09	up	NA	novel	NM_019472	Myo10	exonic	1739
chr13	103833861	103834240	diffreps_peak_00039577	10.7836	379	chr13:103827907-103835028-	2.77853	1.64587e-11	1.24919e-08	up	NA	novel	NM_001005868	Erbb2ip	exonic	1792
chr17	6169661	6169860	diffreps_peak_00058969	5.8148	199	chr17:6137211-6185298+	58.2	1.53178e-06	4.44367e-05	up	17_6185298_6137211_-48087|18.69|23|202	PMID:25714049	NM_054040	Tulp4	sense overlapping	48088
chr6	128374861	128375180	diffreps_peak_00123423	9.0296	319	chr6:128365658-128400301+	6.88861	9.34104e-10	2.02433e-07	up	NA	novel	NM_008021	Foxm1	sense overlapping	34644
chr3	34651001	34651580	diffreps_peak_00088263	7.68941	579	chr3:34638358-34653284-	2.156	2.04453e-08	1.65735e-06	up	NA	novel	NM_011443	Sox2	antisense	14927
chr4	97958461	97958680	diffreps_peak_00098049	6.25709	219	chr4:97944867-98041679+	5.98868	5.53231e-07	1.99576e-05	up	NA	novel	NM_010905	Nfia	sense overlapping	96813
chr2	128660804	128660879	diffreps_peak_00082319	7.25555	75	chr2:128658248-128684663-	17.7288	5.55205e-08	3.40037e-06	up	NA	novel	NM_008569	Anapc1	exonic	2263
chr5	115441341	115441445	diffreps_peak_00111641	6.40278	104	chr5:115440485-115441445+	2.93304	3.95568e-07	1.53266e-05	up	mmu_circ_0001393	circBase	NM_008629	Msi1	exonic	201
chr16	14175290	14175400	diffreps_peak_00054017	7.17697	110	chr16:14175291-14183612+	2.31078	6.65314e-08	3.86535e-06	up	NA	novel	NM_023317	Nde1	exonic	286
chr6	99454841	99455080	diffreps_peak_00121327	5.31824	239	chr6:99428789-99456580-	8.86207	4.80572e-06	0.000110903	up	6_99406574_99378783_-27791|15.77|3|4	PMID:25714049	NM_053202	Foxp1	sense overlapping	27792
chr12	53347761	53348260	diffreps_peak_00030905	10.3879	499	chr12:53343286-53354434+	3.55192	4.09337e-11	2.18448e-08	up	NA	novel	uc007nnp.1	Npas3	intronic	11149
chr15	25780973	25781160	diffreps_peak_00046816	6.56731	187	chr15:25778081-25793246+	2.20529	2.70823e-07	1.14644e-05	up	NA	novel	NM_019472	Myo10	exonic	1739
chr15	25811001	25811012	diffreps_peak_00046827	7.70263	11	chr15:25810823-25811012-	2.43768	1.98324e-08	1.62049e-06	up	NA	novel	NM_019472	Myo10	antisense	190
chr18	84389581	84389780	diffreps_peak_00070413	6.31262	199	chr18:84315806-84407793-	8.10204	4.86836e-07	1.79694e-05	up	mmu_circ_0007573	circBase	ENSMUST00000125450	Zfp407	intronic	91988
chr6	128372941	128373560	diffreps_peak_00123421	9.8924	619	chr6:128365658-128400301+	2.35261	1.28116e-10	4.68841e-08	up	NA	novel	NM_008021	Foxm1	sense overlapping	34644
chrY	90813061	90813820	diffreps_peak_00157621	6.44066	759	chrY:90736914-90819638+	2.24183	3.62529e-07	1.42897e-05	up	NA	novel	NM_133362	Erdr1	sense overlapping	82725
chr6	5064901	5064997	diffreps_peak_00116405	5.57197	96	chr6:5064800-5064997-	11.1139	2.67935e-06	6.975e-05	up	NA	novel	NM_181595	Ppp1r9a	antisense	198
chr5	67747277	67747360	diffreps_peak_00108607	5.20257	83	chr5:67729792-67751085-	4.45865	6.27241e-06	0.000137464	up	mmu_circ_0001354	circBase	NM_009727	Atp8a1	exonic	607
chr15	77763263	77763820	diffreps_peak_00049481	5.77149	557	chr15:77763264-77763820-	2.54922	1.69242e-06	4.81497e-05	up	NA	novel	NM_022410	Myh9	sense overlapping	557
chr17	24224907	24225077	diffreps_peak_00060017	8.21423	170	chr17:24224908-24226783-	3.74977	6.10622e-09	7.33058e-07	up	17_24363728_24361853_-1875|18.90|3|4	PMID:25714049	NM_007634	Ccnf	exonic	398
chr4	83554693	83554884	diffreps_peak_00097761	8.86554	191	chr4:83535790-83635742+	2.85237	1.36289e-09	2.6574e-07	up	4_83281646_83181694_-99952|13.17|4|4	PMID:25714049	NM_001081012	Ccdc171	exonic	1425
chr11	109528601	109528920	diffreps_peak_00027010	6.97597	319	chr11:109489768-109572542+	79.7	1.05689e-07	5.4693e-06	up	NA	novel	NM_028710	Arsg	sense overlapping	82775
chr4	70360810	70360965	diffreps_peak_00097294	10.2332	155	chr4:70307195-70380301-	2.05339	5.8456e-11	2.79888e-08	up	NA	novel	NM_145990	Cdk5rap2	exonic	1520
chr15	97810601	97810911	diffreps_peak_00051913	7.30673	310	chr15:97795754-97810911-	2.91004	4.93476e-08	3.11638e-06	up	NA	novel	NM_019572	Hdac7	sense overlapping	15158
chr2	92320228	92320459	diffreps_peak_00080334	7.2896	231	chr2:92320229-92330808+	3.2133	5.13337e-08	3.21113e-06	up	mmu_circ_0010264	circBase	NM_138755	Phf21a	exonic	612
chr7	134763848	134763973	diffreps_peak_00134889	10.4348	125	chr7:134756877-134789285+	3.01434	3.67463e-11	2.03137e-08	up	7_141980968_141948560_-32408|17.11|3|3	PMID:25714049	NM_001033420	Dock1	exonic	1215
chr2	31077385	31077400	diffreps_peak_00077132	11.4079	15	chr2:31077386-31077620-	4.07461	3.9097e-12	6.46132e-09	up	NA	novel	ENSMUST00000073879	Fnbp1	intronic	235
chr8	120657527	120657800	diffreps_peak_00143486	10.973	273	chr8:120657528-120660860-	12.1	1.06423e-11	9.91314e-09	up	8_123184760_123181428_-3332|12.20|2|2	PMID:25714049	ENSMUST00000181333	Gm27021	intronic	3333
chr4	102436201	102436540	diffreps_peak_00098353	5.08108	339	chr4:102421549-102506042+	57.8	8.29703e-06	0.000171332	up	NA	novel	NM_019840	Pde4b	sense overlapping	84494
chr1	10104261	10104364	diffreps_peak_00000249	5.45315	103	chr1:10104212-10108481+	3.86222	3.52252e-06	8.73076e-05	up	1_10098562_10094293_-4269|12.61|2|3	PMID:25714049	NM_026493	Cspp1	exonic	266
chr13	107740241	107740379	diffreps_peak_00039762	5.34789	138	chr13:107733799-107748363-	4.60426	4.48857e-06	0.000105063	up	NA	novel	NM_145456	Zswim6	exonic	1048
chr8	70331680	70331840	diffreps_peak_00139356	5.64204	160	chr8:70331681-70331840-	2	2.28011e-06	6.11832e-05	up	NA	novel	NM_030680	Upf1	sense overlapping	160
chr1	131511181	131511440	diffreps_peak_00005872	5.54586	259	chr1:131436750-131524999-	10.2022	2.84535e-06	7.32524e-05	up	NA	novel	NM_001081011	Srgap2	sense overlapping	88250
chr6	128365657	128365880	diffreps_peak_00123419	7.82761	223	chr6:128365658-128400301+	3.21739	1.48727e-08	1.31428e-06	up	NA	novel	NM_008021	Foxm1	sense overlapping	34644
chr18	75603981	75604360	diffreps_peak_00069830	9.86883	379	chr18:75565004-75637341-	14.7558	1.35259e-10	4.88857e-08	up	18_75796995_75724658_-72337|19.06|8|11	PMID:25714049	NM_201354	Ctif	sense overlapping	72338
chr6	34755739	34755898	diffreps_peak_00117761	7.18222	159	chr6:34755740-34755898+	2.5122	6.5732e-08	3.83113e-06	up	NA	novel	NM_145575	Cald1	sense overlapping	159
chr7	28364916	28365470	diffreps_peak_00126772	9.35112	554	chr7:28364917-28365470-	3.4916	4.45529e-10	1.17353e-07	up	NA	novel	NM_138752	Plekhg2	sense overlapping	554
chr2	119446855	119446920	diffreps_peak_00081571	5.31926	65	chr2:119441613-119458266-	3.45234	4.79442e-06	0.000110705	up	NA	novel	NM_026574	Ino80	exonic	1735
chr5	123801794	123801966	diffreps_peak_00112941	6.17108	172	chr5:123787507-123815029+	10.6707	6.74406e-07	2.3251e-05	up	NA	novel	NM_001042421	Kntc1	exonic	2710
chr5	137311873	137312043	diffreps_peak_00114746	5.91284	170	chr5:137311874-137312233-	2.37707	1.22226e-06	3.72008e-05	up	5_137753461_137753102_-359|14.00|17|51	PMID:25714049	NM_011639	Trip6	exonic	264
chr6	29753261	29753540	diffreps_peak_00117282	8.99524	279	chr6:29750392-29759958+	18.3304	1.01102e-09	2.14701e-07	up	NA	novel	AK140774	NA	intronic	9567
chr3	89440121	89440440	diffreps_peak_00090540	5.46434	319	chr3:89439602-89443099+	7.4152	3.43288e-06	8.55306e-05	up	NA	novel	ENSMUST00000038942	Pbxip1	intronic	3498
chr10	84868861	84868962	diffreps_peak_00014961	10.761	101	chr10:84868352-84880974+	2.58133	1.73388e-11	1.26899e-08	up	NA	novel	NM_027689	Rfx4	exonic	495
chr4	97967461	97967820	diffreps_peak_00098050	8.45889	359	chr4:97944867-98041679+	6.42651	3.47623e-09	5.00614e-07	up	NA	novel	NM_010905	Nfia	sense overlapping	96813

## Sheet: Up-OGDR3h_vs_control
Chromosome	Transcript start	Transcript end	Peak ID	Score	Peak length	circRNA	Fold change	P value	FDR	Regulation	circBaseID	Source	Best transcript	Gene name	Catalog	Predicted sequence length
chr2	143978181	143978540	diffreps_peak_00078979	8.9646	359	chr2:143974461-143988586-	170.4	1.08493e-09	1.4834e-07	up	NA	novel	NM_024281	Rrbp1	sense overlapping	14126
chr5	53627382	53627421	diffreps_peak_00102760	5.171	39	chr5:53627383-53646044+	6.73418	6.74522e-06	0.00010833	up	NA	novel	NM_009035	Rbpj	exonic	476
chr17	70989681	70990160	diffreps_peak_00061135	6.31917	479	chr17:70977048-70996271-	2.03456	4.79543e-07	1.19415e-05	up	NA	novel	NM_023402	Myl12b	sense overlapping	19224
chr7	80103181	80103500	diffreps_peak_00123842	7.35306	319	chr7:80103182-80115304-	2.55763	4.43547e-08	1.9084e-06	up	NA	novel	NM_173011	Idh2	sense overlapping	12123
chr4	119233299	119233400	diffreps_peak_00094742	11.8029	101	chr4:119233300-119233603-	2.94538	1.57441e-12	1.81877e-09	up	NA	novel	AK165077	NA	sense overlapping	304
chrX	170010673	170011260	diffreps_peak_00149358	5.46403	587	chrX:170010674-170019058+	2.10381	3.43534e-06	6.12073e-05	up	NA	novel	ENSMUST00000178789	Gm21887	sense overlapping	8385
chr14	18596381	18596580	diffreps_peak_00038795	7.65517	199	chr14:18574307-18630431-	94.3	2.21222e-08	1.15709e-06	up	14_19462945_19406821_-56124|17.78|8|17	PMID:25714049	NM_144839	Ube2e2	sense overlapping	56125
chr14	75719691	75719812	diffreps_peak_00042198	6.8302	121	chr14:75717109-75727813-	5.16236	1.47843e-07	4.68094e-06	up	NA	novel	NM_177381	Cog3	exonic	531
chr15	58122461	58122602	diffreps_peak_00045821	11.0415	141	chr15:58116768-58122602-	2.95107	9.0888e-12	4.9132e-09	up	15_57954157_57948323_-5834|17.33|2|2	PMID:25714049	NM_027435	Atad2	exonic	598
chrM	5761	6080	diffreps_peak_00145433	6.41323	319	chrM:1267-14867+	2.09483	3.86159e-07	1.00315e-05	up	NA	novel	uc009vew.1	AK018753	sense overlapping	13601
chr4	147892101	147892440	diffreps_peak_00098316	5.62502	339	chr4:147888659-147894616-	56.7	2.37126e-06	4.47823e-05	up	NA	novel	NM_133201	Mfn2	sense overlapping	5958
chr6	37358462	37358647	diffreps_peak_00111954	6.84528	185	chr6:37353557-37358647-	5.15656	1.42796e-07	4.55534e-06	up	6_37308647_37303557_-5090|18.62|5|7	PMID:25714049	NM_178661	Creb3l2	exonic	460
chrX	10527561	10527860	diffreps_peak_00145713	7.56994	299	chrX:10522506-10531524+	3.42014	2.69188e-08	1.32914e-06	up	NA	novel	ENSMUST00000076354	Tspan7	intronic	9019
chr7	123180539	123180677	diffreps_peak_00127017	7.54498	138	chr7:123179717-123181447+	3.45742	2.85118e-08	1.3847e-06	up	NA	novel	NM_144925	Tnrc6a	exonic	410
chr11	116694622	116694680	diffreps_peak_00026065	11.0212	58	chr11:116694623-116695010+	134.5	9.52381e-12	5.0076e-09	up	NA	novel	NM_009180	St6galnac2	antisense	388
chr11	109564881	109565920	diffreps_peak_00025367	7.87469	1039	chr11:109489768-109572542+	8.6891	1.33446e-08	8.26814e-07	up	NA	novel	NM_028710	Arsg	sense overlapping	82775
chr10	26860721	26860732	diffreps_peak_00010337	5.62503	11	chr10:26854874-26880770+	56	2.37121e-06	4.47823e-05	up	10_26600576_26574680_-25896|14.28|2|2	PMID:25714049	NM_176837	Arhgap18	exonic	819
chr18	5704781	5705200	diffreps_peak_00062392	6.89928	419	chr18:5633204-5705243+	2.55976	1.26103e-07	4.14442e-06	up	18_5705241_5633202_-72039|12.53|19|120	PMID:25714049	NM_011546	Zeb1	sense overlapping	72040
chr7	49048501	49048980	diffreps_peak_00122189	9.67106	479	chr7:48992875-49088987+	4.11677	2.13273e-10	4.29561e-08	up	NA	novel	ENSMUST00000183659	Nav2	intronic	96113
chrY	90785521	90786240	diffreps_peak_00149578	5.35158	719	chrY:90736914-90819638+	2.11912	4.45066e-06	7.61317e-05	up	NA	novel	NM_133362	Erdr1	sense overlapping	82725
chr10	32574301	32574540	diffreps_peak_00010621	5.08428	239	chr10:32572259-32616486-	59.9	8.23602e-06	0.000128719	up	mmu_circ_0002167	circBase	NM_001013411	Nkain2	intronic	44228
chr12	85908792	85908855	diffreps_peak_00031056	6.13317	63	chr12:85899393-85917774+	2.8399	7.35917e-07	1.69119e-05	up	NA	novel	uc007ohk.2	Ttll5	exonic	294
chr3	135238381	135238470	diffreps_peak_00088294	7.67804	89	chr3:135237503-135241106+	14.6595	2.09877e-08	1.1172e-06	up	NA	novel	NM_173762	Cenpe	exonic	1095
chr3	28545481	28545840	diffreps_peak_00083216	5.43538	359	chr3:28543986-28548653+	20	3.66964e-06	6.47711e-05	up	NA	novel	ENSMUST00000159236	Tnik	intronic	4668
chr6	120750851	120751005	diffreps_peak_00116521	7.96612	154	chr6:120738156-120754740+	2.82692	1.08113e-08	7.21977e-07	up	NA	novel	NM_001128151	Cecr2	exonic	668
chr5	20898561	20898860	diffreps_peak_00100314	5.736	299	chr5:20896120-20927730-	64.3	1.83652e-06	3.61926e-05	up	NA	novel	NM_001080977	Rsbn1l	sense overlapping	31611
chr9	110711085	110711162	diffreps_peak_00144535	6.93777	77	chr9:110708446-110711162+	2.52014	1.15406e-07	3.86165e-06	up	NA	novel	NM_028312	Ccdc12	exonic	254
chr11	8519481	8519570	diffreps_peak_00017258	8.72668	89	chr11:8518199-8519570-	7.36395	1.87637e-09	2.24657e-07	up	mmu_circ_0000234	circBase	NM_001083587	Tns3	exonic	301
chr3	90225607	90225887	diffreps_peak_00085974	6.22551	280	chr3:90225608-90225887+	2.45025	5.94957e-07	1.41613e-05	up	NA	novel	NM_026677	Rab13	sense overlapping	280
chr5	125622861	125623060	diffreps_peak_00107626	7.09686	199	chr5:125622461-125623352+	3.17972	8.00099e-08	2.95703e-06	up	5_126103722_126102831_-891|22.45|10|22	PMID:25714049	NM_001190352	Tmem132b	exonic	892
chr15	12338661	12338940	diffreps_peak_00044224	5.99202	279	chr15:12330576-12343151+	6.83173	1.01854e-06	2.21191e-05	up	NA	novel	uc011zrm.1	Golph3	intronic	12576
chr15	100528394	100528546	diffreps_peak_00049669	6.33272	152	chr15:100525567-100528546-	2.36121	4.64815e-07	1.16448e-05	up	15_100358977_100355998_-2979|15.28|1|2	PMID:25714049	NM_033476	Tfcp2	exonic	335
chrX	96163341	96163860	diffreps_peak_00147464	9.67578	519	chrX:96160196-96166131+	3.93382	2.1097e-10	4.2709e-08	up	NA	novel	NM_010833	Msn	sense overlapping	5936
chr15	58105476	58105662	diffreps_peak_00045817	7.98521	186	chr15:58099711-58111276-	4.60856	1.03464e-08	7.02805e-07	up	NA	novel	NM_027435	Atad2	exonic	1814
chr6	115787129	115787269	diffreps_peak_00116012	9.41944	140	chr6:115786876-115793171+	2.03702	3.80677e-10	6.75521e-08	up	NA	novel	NM_025958	Cand2	exonic	2184
chr7	13278927	13279640	diffreps_peak_00118774	9.88408	713	chr7:13278928-13282542+	2.37283	1.30592e-10	2.98484e-08	up	NA	novel	NM_010715	Lig1	sense overlapping	3615
chr16	31194161	31194620	diffreps_peak_00052264	7.84841	459	chr16:31170600-31196653-	4.64319	1.4177e-08	8.58812e-07	up	NA	novel	NR_035427	Mir1195	intronic	26054
chr18	36178001	36178400	diffreps_peak_00063848	6.25628	399	chr18:36165423-36184590-	4.2275	5.54263e-07	1.34034e-05	up	NA	novel	ENSMUST00000115705	Nrg2	intronic	19168
chr5	115440484	115440567	diffreps_peak_00106043	9.2085	83	chr5:115440485-115441445+	2.56868	6.18725e-10	9.85755e-08	up	mmu_circ_0001393	circBase	NM_008629	Msi1	exonic	201
chr9	45672625	45672680	diffreps_peak_00140003	5.13259	55	chr9:45672626-45672915+	5.12329	7.36907e-06	0.000116845	up	mmu_circ_0015611	circBase	uc009pga.1	Dscaml1	exonic	290
chr9	124439661	124440200	diffreps_peak_00145423	5.39622	539	chr9:124423792-124440885+	2.31847	4.01585e-06	6.97219e-05	up	NA	novel	NR_015516	4930526I15Rik	sense overlapping	17094
chr12	8983441	8983660	diffreps_peak_00027537	9.26454	219	chr12:8974049-8985794+	6.84211	5.43822e-10	8.87662e-08	up	NA	novel	NM_172470	Wdr35	sense overlapping	11746
chr7	115643141	115643203	diffreps_peak_00126375	9.01524	62	chr7:115642898-115643203-	4.91284	9.65525e-10	1.36823e-07	up	NA	novel	ENSMUST00000072804	Sox6	intronic	306
chr16	14313881	14314013	diffreps_peak_00051245	10.1488	132	chr16:14311047-14314013-	11.5369	7.09856e-11	1.89729e-08	up	NA	novel	NM_025345	Fopnl	exonic	283
chr12	104736341	104736700	diffreps_peak_00032142	7.1964	359	chr12:104731800-104738848-	84.2	6.36202e-08	2.47243e-06	up	NA	novel	NM_148948	Dicer1	sense overlapping	7049
chr3	127815595	127815694	diffreps_peak_00088113	7.15542	99	chr3:127812216-127817006-	3.34981	6.99165e-08	2.66696e-06	up	3_127519924_127515134_-4790|16.81|8|13	PMID:25714049	NM_145964	Ap1ar	exonic	455
chr13	95837823	95837923	diffreps_peak_00037267	11.3092	100	chr13:95763246-95837923-	3.22635	4.90673e-12	3.45197e-09	up	13_96607878_96533201_-74677|17.44|9|23	PMID:25714049	NM_027711	Iqgap2	exonic	257
chr13	54560790	54561000	diffreps_peak_00035557	7.2797	210	chr13:54560791-54564049-	7.87234	5.25164e-08	2.15845e-06	up	NA	novel	NM_001252647	4833439L19Rik	intronic	3259
chr13	15548399	15548520	diffreps_peak_00033794	8.29414	121	chr13:15478000-15548642+	3.78297	5.07991e-09	4.34402e-07	up	13_15640475_15569833_-70642|17.86|2|2	PMID:25714049	NM_008130	Gli3	exonic	408
chr4	132370761	132371120	diffreps_peak_00096450	5.92808	359	chr4:132363731-132371120-	2.91649	1.18011e-06	2.49789e-05	up	NA	novel	NM_175306	Phactr4	exonic	1049
chr7	65311003	65311120	diffreps_peak_00123139	6.77069	117	chr7:65311004-65342719-	2.15723	1.69556e-07	5.22176e-06	up	NA	novel	NM_009386	Tjp1	exonic	3990
chr16	94409741	94410200	diffreps_peak_00055285	9.11382	459	chr16:94383912-94468064+	2.39121	7.6945e-10	1.16174e-07	up	NA	novel	NM_009441	Ttc3	sense overlapping	84153
chr10	4355846	4356049	diffreps_peak_00009330	6.4328	203	chr10:4355847-4356049+	2.52494	3.69144e-07	9.69745e-06	up	NA	novel	NM_031185	Akap12	sense overlapping	203
chr5	113146741	113147720	diffreps_peak_00105678	6.48051	979	chr5:113090844-113183623-	2.60204	3.30743e-07	8.86758e-06	up	NA	novel	NM_172884	2900026A02Rik	sense overlapping	92780
chr10	9581773	9581923	diffreps_peak_00009665	6.05085	150	chr10:9581774-9581923+	2.1992	8.89502e-07	1.97593e-05	up	NA	novel	NA	NA	intergenic	150
chr4	56847881	56847999	diffreps_peak_00091841	5.06792	118	chr4:56838966-56847999-	2.97694	8.55227e-06	0.000133002	up	NA	novel	NM_018761	Ctnnal1	exonic	588
chr2	150636881	150637480	diffreps_peak_00079237	6.26921	599	chr2:150625766-150644241-	2.90844	5.38016e-07	1.30854e-05	up	NA	novel	NM_080575	Acss1	sense overlapping	18476
chr10	8784181	8784560	diffreps_peak_00009545	6.56074	379	chr10:8780519-8814457+	2.76394	2.74957e-07	7.61329e-06	up	NA	novel	NM_175155	Sash1	antisense	33939
chr5	103575078	103575140	diffreps_peak_00104730	5.24089	62	chr5:103559137-103582776+	62.3	5.74257e-06	9.44207e-05	up	NA	novel	NM_011204	Ptpn13	exonic	2092
chr4	70364006	70364130	diffreps_peak_00092410	9.58538	124	chr4:70307195-70380301-	2.54193	2.59786e-10	4.99898e-08	up	NA	novel	NM_145990	Cdk5rap2	exonic	1520
chr15	95948271	95948497	diffreps_peak_00049054	10.9281	226	chr15:95920244-95956021+	4.08132	1.18014e-11	5.69658e-09	up	NA	novel	NM_175344	Ano6	exonic	1148
chr13	58344661	58344920	diffreps_peak_00035949	8.5409	259	chr13:58328856-58354947-	20.2653	2.87804e-09	2.94624e-07	up	13_58456308_58430217_-26091|14.96|3|11	PMID:25714049	NM_175214	Kif27	sense overlapping	26092
chr10	13130571	13130803	diffreps_peak_00009809	8.10973	232	chr10:13130572-13130803+	3.6512	7.76724e-09	5.81566e-07	up	NA	novel	NM_009538	Plagl1	sense overlapping	232
chr7	134763848	134763973	diffreps_peak_00128058	11.9213	125	chr7:134756877-134789285+	3.48144	1.19862e-12	1.56611e-09	up	7_141980968_141948560_-32408|17.11|3|3	PMID:25714049	NM_001033420	Dock1	exonic	1215
chr2	20881841	20881851	diffreps_peak_00071998	8.12971	10	chr2:20879961-20889953-	2.75367	7.41801e-09	5.65594e-07	up	2_20811580_20801588_-9992|18.02|14|31	PMID:25714049	NM_001081364	Arhgap21	exonic	2025
chr13	63533263	63533666	diffreps_peak_00036244	6.23214	403	chr13:63533264-63534408-	2.60623	5.85944e-07	1.39972e-05	up	NA	novel	NM_008957	Ptch1	exonic	522
chr18	80972861	80973720	diffreps_peak_00066696	6.6213	859	chr18:80969275-80974629-	2.50438	2.39169e-07	6.84593e-06	up	NA	novel	NM_178280	Sall3	sense overlapping	5355
chr6	94042721	94043040	diffreps_peak_00115009	5.75893	319	chr6:94026942-94050766-	68.8	1.7421e-06	3.46902e-05	up	NA	novel	ENSMUST00000055224	Magi1	intronic	23825
chr7	16546721	16546960	diffreps_peak_00119061	5.64983	239	chr7:16495622-16561975-	8.26496	2.23961e-06	4.28965e-05	up	NA	novel	NM_172739	Arhgap35	sense overlapping	66354
chr18	82988101	82988198	diffreps_peak_00066778	6.55827	97	chr18:82986744-82988198+	7.24309	2.76522e-07	7.64914e-06	up	18_83157590_83156136_-1454|18.31|6|8	PMID:25714049	NM_183033	Zfp516	exonic	1455
chr11	29482597	29482741	diffreps_peak_00017893	8.44281	144	chr11:29482109-29498612+	3.52722	3.60739e-09	3.42922e-07	up	11_29398612_29382109_-16503|11.83|17|80	PMID:25714049	NM_176841	Ccdc88a	exonic	1267
chr7	116189269	116189353	diffreps_peak_00126455	10.8121	84	chr7:116175712-116189353-	3.75515	1.54135e-11	6.69129e-09	up	NA	novel	NM_001305185	Plekha7	exonic	475
chr6	71522141	71522540	diffreps_peak_00113399	6.55111	399	chr6:71505734-71561076+	11.0889	2.81121e-07	7.75689e-06	up	NA	novel	NM_009543	Rnf103	sense overlapping	55343
chr2	83654361	83654740	diffreps_peak_00075734	7.73004	379	chr2:83653358-83664192+	10.7607	1.86192e-08	1.03112e-06	up	2_83504349_83493515_-10834|15.19|12|28	PMID:25714049	NM_026934	Zc3h15	sense overlapping	10835
chr7	28364916	28365460	diffreps_peak_00120358	6.5379	544	chr7:28364917-28365470-	4.43829	2.89802e-07	7.95643e-06	up	NA	novel	NM_138752	Plekhg2	sense overlapping	554
chr5	5044141	5044400	diffreps_peak_00099733	6.04654	259	chr5:5010833-5050499-	72	8.9839e-07	1.99277e-05	up	NA	novel	NM_011074	Cdk14	sense overlapping	39667
chr15	97807521	97808380	diffreps_peak_00049197	7.18304	859	chr15:97795754-97810911-	2.34817	6.56091e-08	2.53215e-06	up	NA	novel	NM_019572	Hdac7	sense overlapping	15158
chr6	53685292	53685520	diffreps_peak_00112880	5.31627	228	chr6:53680936-53685520+	2.92704	4.82763e-06	8.16368e-05	up	NA	novel	NM_172728	Creb5	exonic	552
chr6	22925829	22925895	diffreps_peak_00111071	10.707	66	chr6:22925830-23000199+	2.43666	1.96317e-11	7.83382e-09	up	6_22950199_22875830_-74369|14.03|7|7	PMID:25714049	uc012eim.1	Ptprz1	exonic	2229
chr5	103783123	103783244	diffreps_peak_00104737	8.50711	121	chr5:103783124-103784513+	3.47632	3.11091e-09	3.08744e-07	up	mmu_circ_0011938	circBase	NM_133919	Aff1	exonic	979
chr2	5974061	5974280	diffreps_peak_00071344	7.48887	219	chr2:5973508-5988472+	16.4127	3.24438e-08	1.5267e-06	up	NA	novel	NM_001081132	Upf2	sense overlapping	14965
chr7	48994461	48995100	diffreps_peak_00122173	7.20035	639	chr7:48992875-49088987+	2.45482	6.30453e-08	2.45586e-06	up	NA	novel	ENSMUST00000183659	Nav2	intronic	96113
chr3	87977721	87977936	diffreps_peak_00085410	6.68719	215	chr3:87975837-87977936+	3.43778	2.05499e-07	6.09772e-06	up	NA	novel	NM_016701	Nes	sense overlapping	2100
chr18	34280721	34280812	diffreps_peak_00063590	7.51263	91	chr18:34280653-34280812+	2.06416	3.07165e-08	1.46655e-06	up	NA	novel	ENSMUST00000066133	Apc	intronic	160
chr1	182323541	182323740	diffreps_peak_00008629	5.8625	199	chr1:182320156-182324721-	4.5817	1.37247e-06	2.83225e-05	up	NA	novel	ENSMUST00000051431	Fbxo28	intronic	4566
chr9	13620901	13621200	diffreps_peak_00137559	7.75124	299	chr9:13619990-13621675+	3.1061	1.7732e-08	9.97131e-07	up	9_13426119_13424434_-1685|21.55|15|32	PMID:25714049	ENSMUST00000159294	Maml2	exonic	1686
chr13	15648520	15648722	diffreps_peak_00033801	11.754	202	chr13:15641069-15662530+	3.05565	1.76184e-12	1.96568e-09	up	13_15754363_15732902_-21461|19.61|2|2	PMID:25714049	NM_008130	Gli3	exonic	1024
chr6	128352701	128353060	diffreps_peak_00117152	10.1582	359	chr6:128333833-128359354+	105.8	6.94726e-11	1.87635e-08	up	NA	novel	ENSMUST00000180586	Gm26770	sense overlapping	25522
chr7	125770721	125770980	diffreps_peak_00127097	8.55086	259	chr7:125740278-125820183+	29.5455	2.81279e-09	2.90779e-07	up	NA	novel	NM_001081022	D430042O09Rik	sense overlapping	79906
chr13	94365216	94365220	diffreps_peak_00037157	5.12787	4	chr13:94365217-94365768+	4.20588	7.44952e-06	0.000118036	up	NA	novel	ENSMUST00000022196	Ap3b1	intronic	552
chr2	116035881	116036080	diffreps_peak_00077147	5.01659	199	chr2:115994226-116049198-	5.05909	9.62523e-06	0.000147332	up	NA	novel	NM_010825	Meis2	sense overlapping	54973
chr18	25307781	25308060	diffreps_peak_00063123	6.73662	279	chr18:25302236-25346699-	81.4	1.83393e-07	5.5641e-06	up	NA	novel	NM_001033532	AW554918	antisense	44464
chr2	20788427	20788611	diffreps_peak_00071979	9.35931	184	chr2:20778026-20788611+	2.70942	4.37206e-10	7.49035e-08	up	2_20710238_20699653_-10585|17.66|2|2	PMID:25714049	NM_029895	Etl4	exonic	1063
chrX	170018441	170019058	diffreps_peak_00149359	5.81027	617	chrX:170010674-170019058+	2.04167	1.54785e-06	3.13571e-05	up	NA	novel	ENSMUST00000178789	Gm21887	sense overlapping	8385
chr15	78987891	78987948	diffreps_peak_00047236	7.50535	57	chr15:78987892-79003792+	3.86126	3.12358e-08	1.48252e-06	up	NA	novel	NM_138579	Triobp	exonic	1578
chr6	84149873	84150035	diffreps_peak_00114045	8.54975	162	chr6:84149675-84152409+	7.02071	2.81999e-09	2.91084e-07	up	6_84102403_84099669_-2734|21.68|2|2	PMID:25714049	NM_021469	Dysf	exonic	507
chr8	85912141	85912580	diffreps_peak_00133968	6.78418	439	chr8:85894816-85922242+	6.09275	1.6437e-07	5.08256e-06	up	NA	novel	NM_199446	Phkb	sense overlapping	27427
chr9	103338301	103338372	diffreps_peak_00143599	8.41309	71	chr9:103334056-103342148+	3.74523	3.86284e-09	3.60808e-07	up	9_103244478_103236386_-8092|14.34|2|2	PMID:25714049	NM_176979	Topbp1	exonic	788
chr10	62437433	62437440	diffreps_peak_00011943	6.98976	7	chr10:62437434-62441246-	10.0631	1.02385e-07	3.52305e-06	up	10_61903994_61900182_-3812|19.20|7|9	PMID:25714049	NM_181423	Supv3l1	exonic	282
chr14	27450801	27451280	diffreps_peak_00039511	9.58206	479	chr14:27438599-27480842+	4.2319	2.61784e-10	5.0228e-08	up	14_28294028_28251785_-42243|14.27|3|3	PMID:25714049	NM_028945	Fam208a	sense overlapping	42244
chr11	30851142	30851234	diffreps_peak_00018035	5.40556	92	chr11:30841569-30878517+	3.26129	3.9304e-06	6.85263e-05	up	NA	novel	NM_134013	Psme4	exonic	2114
chr11	102514281	102514580	diffreps_peak_00024541	7.24433	299	chr11:102500803-102521071-	7.8565	5.69732e-08	2.28206e-06	up	NA	novel	NM_001159492	Gpatch8	sense overlapping	20269
chr2	18302221	18302760	diffreps_peak_00071897	7.89601	539	chr2:18260072-18308949-	30.7838	1.27053e-08	8.00709e-07	up	NA	novel	NM_007869	Dnajc1	sense overlapping	48878
chr18	23535161	23535229	diffreps_peak_00062947	11.1774	68	chr18:23535162-23569775+	2.89386	6.64695e-12	4.21311e-09	up	18_23728276_23693663_-34613|11.33|7|15	PMID:25714049	NM_010087	Dtna	exonic	363
chr5	125118616	125118794	diffreps_peak_00107518	8.50886	178	chr5:125118617-125119609-	2.04441	3.0984e-09	3.07965e-07	up	5_125599979_125598987_-992|20.99|4|4	PMID:25714049	NM_011424	Ncor2	exonic	306
chr15	95949490	95949600	diffreps_peak_00049055	9.08239	110	chr15:95920244-95956021+	2.43217	8.27195e-10	1.22196e-07	up	NA	novel	NM_175344	Ano6	exonic	1148
chr14	45587885	45588000	diffreps_peak_00040439	5.52988	115	chr14:45587886-45629753-	4.6901	2.952e-06	5.39275e-05	up	14_46249428_46207561_-41867|15.42|2|3	PMID:25714049	NM_176845	Ddhd1	sense overlapping	41868
chr1	176757101	176757400	diffreps_peak_00008108	5.08095	299	chr1:176742552-176774910-	6.39394	8.29937e-06	0.000129617	up	NA	novel	NR_029775	Mir350	sense overlapping	32359
chr4	82330291	82330426	diffreps_peak_00092759	7.81246	135	chr4:82310303-82353643-	2.17953	1.54006e-08	9.06636e-07	up	NA	novel	NM_001113209	Nfib	exonic	898
chr19	28283041	28283420	diffreps_peak_00068903	10.5914	379	chr19:28262627-28298946-	116.7	2.5622e-11	9.3058e-09	up	NA	novel	NM_175459	Glis3	sense overlapping	36320
chr6	134083201	134083400	diffreps_peak_00117229	5.73385	199	chr6:134082657-134137417+	68.7	1.84567e-06	3.6326e-05	up	NA	novel	NM_007961	Etv6	sense overlapping	54761
chr4	126388461	126388740	diffreps_peak_00095507	5.30806	279	chr4:126346631-126439611-	11.9365	4.91968e-06	8.30235e-05	up	NA	novel	NM_153402	Ago3	sense overlapping	92981
chr2	117160481	117160820	diffreps_peak_00077176	7.67045	339	chr2:117152992-117182126+	93.6	2.13574e-08	1.13202e-06	up	NA	novel	NM_033524	Spred1	sense overlapping	29135
chrY	90759521	90759720	diffreps_peak_00149556	6.48735	199	chrY:90736914-90819638+	6.13622	3.25572e-07	8.75216e-06	up	NA	novel	NM_133362	Erdr1	sense overlapping	82725
chr16	43610341	43610800	diffreps_peak_00053470	10.0391	459	chr16:43577030-43610931+	3.50273	9.13991e-11	2.28086e-08	up	NA	novel	NM_019778	Zbtb20	exonic	1957
chr2	120811621	120811960	diffreps_peak_00077515	5.80452	339	chr2:120790282-120837260-	15.0702	1.5685e-06	3.17204e-05	up	2_120662996_120616018_-46978|21.32|2|2	PMID:25714049	NM_080788	Ttbk2	sense overlapping	46979
chr16	43574001	43574240	diffreps_peak_00053459	5.28851	239	chr16:43561713-43577748+	4.3544	5.14626e-06	8.61948e-05	up	16_43577861_43561826_-16035|15.88|11|42	PMID:25714049	NM_019778	Zbtb20	sense overlapping	16036
chr8	80791388	80791614	diffreps_peak_00133237	9.15475	226	chr8:80784627-80800395-	3.78163	7.00253e-10	1.08155e-07	up	8_83324294_83308526_-15768|17.58|11|16	PMID:25714049	NM_021356	Gab1	exonic	1516
chr4	70380190	70380300	diffreps_peak_00092416	9.04197	110	chr4:70307195-70380301-	2.3712	9.07885e-10	1.3052e-07	up	NA	novel	NM_145990	Cdk5rap2	exonic	1520
chr16	39012101	39012380	diffreps_peak_00053100	7.49856	279	chr16:39007134-39025313-	91.1	3.17276e-08	1.4994e-06	up	NA	novel	AK088657	NA	intronic	18180
chr11	119725009	119725160	diffreps_peak_00026671	5.2083	151	chr11:119671278-119744013+	3.97303	6.19011e-06	0.000100538	up	NA	novel	NM_028898	Rptor	exonic	389
chr10	84395041	84395420	diffreps_peak_00013998	5.07454	379	chr10:84392256-84422227-	3.06342	8.42296e-06	0.000131248	up	NA	novel	NM_001004363	Nuak1	sense overlapping	29972
chr4	70235101	70235300	diffreps_peak_00092373	7.31558	199	chr4:70222828-70235490-	11.8854	4.83527e-08	2.03065e-06	up	NA	novel	NM_145990	Cdk5rap2	sense overlapping	12663
chr3	75894834	75895137	diffreps_peak_00084859	6.31746	303	chr3:75894835-75898132-	2.73088	4.81441e-07	1.19415e-05	up	mmu_circ_0010789	circBase	NM_175193	Golim4	exonic	465
chr12	119194581	119194860	diffreps_peak_00033236	9.28862	279	chr12:119180303-119222477-	7.19231	5.14499e-10	8.54164e-08	up	NA	novel	NM_177290	Itgb8	sense overlapping	42175
chr9	96049041	96049300	diffreps_peak_00143117	7.0368	259	chr9:96026889-96052814+	18.4167	9.1875e-08	3.26361e-06	up	NA	novel	NM_011916	Xrn1	sense overlapping	25926
chr15	58103221	58103394	diffreps_peak_00045814	7.97876	173	chr15:58099711-58111276-	5.6624	1.05011e-08	7.08859e-07	up	NA	novel	NM_027435	Atad2	exonic	1814
chr9	67031451	67031514	diffreps_peak_00141897	7.99022	63	chr9:67031452-67032541-	2.67724	1.02277e-08	6.97766e-07	up	NA	novel	NM_001164250	Tpm1	exonic	139
chr2	77049578	77049580	diffreps_peak_00075547	8.67736	2	chr2:77023446-77059681-	6.95853	2.10205e-09	2.43244e-07	up	NA	novel	NM_001025576	Ccdc141	exonic	2092
chr1	167316242	167316289	diffreps_peak_00007460	9.6378	47	chr1:167314107-167319329+	4.72107	2.30248e-10	4.52689e-08	up	1_169249460_169244238_-5222|13.93|1|2	PMID:25714049	NM_001039483	Tmco1	exonic	175
chr2	16373021	16373219	diffreps_peak_00071792	5.01256	198	chr2:16372857-16373219+	2.4935	9.71489e-06	0.000148498	up	NA	novel	ENSMUST00000028081	Plxdc2	intronic	363
chr6	113612401	113612640	diffreps_peak_00115737	5.02505	239	chr6:113611495-113614313+	2.67088	9.43961e-06	0.000145084	up	NA	novel	ENSMUST00000035725	Brk1	intronic	2819
chr9	65776041	65776300	diffreps_peak_00141761	5.96356	259	chr9:65740731-65778226-	60.4	1.08753e-06	2.33044e-05	up	NA	novel	ENSMUST00000159109	Zfp609	intronic	37496
chr19	38523641	38524120	diffreps_peak_00069375	8.11419	479	chr19:38506315-38525452+	4.01018	7.68802e-09	5.7862e-07	up	NA	novel	NM_019588	Plce1	sense overlapping	19138
chr8	79167041	79167360	diffreps_peak_00133173	8.90536	319	chr8:79118175-79180211-	125.1	1.24349e-09	1.6522e-07	up	NA	novel	NM_178267	Zfp827	antisense	62037
chr7	73515725	73515812	diffreps_peak_00123470	6.8509	87	chr7:73490479-73519708-	2.15138	1.40961e-07	4.5113e-06	up	7_80664594_80635365_-29229|12.39|10|21	PMID:25714049	NM_001081345	Chd2	exonic	1938
chr7	133759761	133759913	diffreps_peak_00127992	6.69026	152	chr7:133759400-133759913-	2.07938	2.04049e-07	6.06287e-06	up	7_140951596_140951083_-513|19.58|3|4	PMID:25714049	NM_133941	Dhx32	exonic	514
chr2	152273781	152274020	diffreps_peak_00079396	5.91888	239	chr2:152250402-152279118+	3.89414	1.20538e-06	2.5397e-05	up	NA	novel	NM_007788	Csnk2a1	sense overlapping	28717
chr4	132704461	132704660	diffreps_peak_00096495	7.39996	199	chr4:132680756-132707123+	8.39502	3.9814e-08	1.76312e-06	up	NA	novel	NM_010166	Eya3	sense overlapping	26368
chr15	57822461	57822860	diffreps_peak_00045782	10.9499	399	chr15:57762646-57823751+	2.23192	1.12218e-11	5.51068e-09	up	NA	novel	NM_199449	Zhx2	exonic	2794
chr8	116607772	116608213	diffreps_peak_00135726	7.2814	441	chr8:116607773-116608213-	2.22733	5.23119e-08	2.15183e-06	up	NA	novel	ENSMUST00000109102	Cdyl2	intronic	441
chr9	45776041	45776240	diffreps_peak_00140062	5.61967	199	chr9:45775865-45776830-	5.60606	2.40066e-06	4.526e-05	up	NA	novel	NM_001081373	Cep164	sense overlapping	966
chr2	150632841	150633160	diffreps_peak_00079235	6.14946	319	chr2:150625766-150644241-	2.36172	7.08822e-07	1.63975e-05	up	NA	novel	NM_080575	Acss1	sense overlapping	18476
chr4	55037281	55037900	diffreps_peak_00091783	7.7059	619	chr4:55007348-55073105+	8.31863	1.96835e-08	1.06929e-06	up	NA	novel	NM_172867	Zfp462	sense overlapping	65758
chr18	80969381	80969780	diffreps_peak_00066693	11.3392	399	chr18:80969275-80974629-	2.96948	4.57901e-12	3.32546e-09	up	NA	novel	NM_178280	Sall3	sense overlapping	5355
chr4	97958381	97958680	diffreps_peak_00093149	7.86215	299	chr4:97944867-98041679+	7.91481	1.37356e-08	8.41838e-07	up	NA	novel	NM_010905	Nfia	sense overlapping	96813
chrX	96160261	96160520	diffreps_peak_00147463	10.5488	259	chrX:96160196-96166131+	3.76838	2.82603e-11	9.80177e-09	up	NA	novel	NM_010833	Msn	sense overlapping	5936
chr11	90661755	90661889	diffreps_peak_00023163	11.752	134	chr11:90656351-90661889-	3.11611	1.77002e-12	1.96568e-09	up	mmu_circ_0003548	circBase	NM_028011	Tom1l1	exonic	413
chr4	70354712	70354860	diffreps_peak_00092401	7.26962	148	chr4:70307195-70380301-	3.25078	5.37499e-08	2.19595e-06	up	NA	novel	NM_145990	Cdk5rap2	exonic	1520
chr13	112676161	112676480	diffreps_peak_00038026	5.60921	319	chr13:112667052-112703645+	7.15504	2.45917e-06	4.61657e-05	up	NA	novel	NM_178746	Slc38a9	sense overlapping	36594
chr4	70360810	70360965	diffreps_peak_00092405	7.96924	155	chr4:70307195-70380301-	2.30178	1.07339e-08	7.18946e-07	up	NA	novel	NM_145990	Cdk5rap2	exonic	1520
chr10	84399741	84400300	diffreps_peak_00014000	6.7377	559	chr10:84392256-84422227-	2.91993	1.82936e-07	5.5528e-06	up	NA	novel	NM_001004363	Nuak1	sense overlapping	29972
chr17	6120921	6121240	diffreps_peak_00055895	5.51046	319	chr17:6118296-6139156+	6.44242	3.08701e-06	5.60943e-05	up	17_6139156_6118296_-20860|16.33|7|10	PMID:25714049	ENSMUST00000142030	Tulp4	intronic	20861
chr4	133190128	133190259	diffreps_peak_00096619	8.48458	131	chr4:133189078-133192260+	3.07318	3.2766e-09	3.2038e-07	up	NA	novel	NM_153423	Wasf2	exonic	405
chrM	7621	8040	diffreps_peak_00145434	5.3274	419	chrM:1267-14867+	2.62386	4.70543e-06	7.99246e-05	up	NA	novel	uc009vew.1	AK018753	sense overlapping	13601
chr8	70285393	70285540	diffreps_peak_00132381	6.6213	147	chr8:70285234-70286062+	2.3118	2.39168e-07	6.84593e-06	up	mmu_circ_0014932	circBase	NM_011984	Homer3	exonic	371
chr4	9601306	9601363	diffreps_peak_00089626	6.10415	57	chr4:9537679-9604629-	2.22039	7.86777e-07	1.78716e-05	up	4_9531776_9464826_-66950|13.97|3|3	PMID:25714049	NM_023066	Asph	exonic	578
chr7	134760811	134760920	diffreps_peak_00128056	7.41558	109	chr7:134756877-134789285+	2.4458	3.84081e-08	1.71812e-06	up	7_141980968_141948560_-32408|17.11|3|3	PMID:25714049	NM_001033420	Dock1	exonic	1215
chr16	85043641	85043743	diffreps_peak_00054678	6.831	102	chr16:85013627-85043743-	2.78686	1.4757e-07	4.67603e-06	up	16_85043988_85013872_-30116|17.40|10|10	PMID:25714049	NM_001198823	App	exonic	822
chr5	113156301	113156580	diffreps_peak_00105679	5.98762	279	chr5:113090844-113183623-	71.9	1.02892e-06	2.22994e-05	up	NA	novel	NM_172884	2900026A02Rik	sense overlapping	92780
chr1	24615334	24615527	diffreps_peak_00000787	6.40421	193	chr1:24615335-24615527-	5.98847	3.94266e-07	1.01981e-05	up	NA	novel	NA	NA	intergenic	193
chr6	55473561	55473760	diffreps_peak_00113022	5.184	199	chr6:55465722-55491586+	14.1053	6.54634e-06	0.000105469	up	NA	novel	NM_007407	Adcyap1r1	sense overlapping	25865
chr17	35854086	35854278	diffreps_peak_00058829	7.74607	192	chr17:35854087-35854278+	2.46285	1.79443e-08	1.00395e-06	up	NA	novel	NM_001010833	Mdc1	sense overlapping	192
chr4	41397546	41397880	diffreps_peak_00090642	8.41559	334	chr4:41397547-41429411-	32.0811	3.84066e-09	3.59371e-07	up	NA	novel	NM_024241	Kif24	sense overlapping	31865
chr6	22970181	22970700	diffreps_peak_00111079	8.07726	519	chr6:22961667-22972821+	2.12375	8.37027e-09	6.1254e-07	up	NA	novel	NM_001081306	Ptprz1	sense overlapping	11155
chr15	25779582	25779810	diffreps_peak_00044492	6.27181	228	chr15:25778081-25793246+	2.37591	5.34804e-07	1.30185e-05	up	NA	novel	NM_019472	Myo10	exonic	1739
chr2	158050261	158051480	diffreps_peak_00080337	8.77318	1219	chr2:158035996-158075084+	3.2602	1.68586e-09	2.07611e-07	up	2_157900820_157861732_-39088|15.94|2|2	PMID:25714049	NM_027434	Rprd1b	sense overlapping	39089
chr5	103564010	103564180	diffreps_peak_00104727	8.42943	170	chr5:103559137-103582776+	2.35734	3.72024e-09	3.50959e-07	up	NA	novel	NM_011204	Ptpn13	exonic	2092
chr9	13497561	13497760	diffreps_peak_00137525	5.58867	199	chr9:13497165-13507902+	20.3333	2.5783e-06	4.80976e-05	up	NA	novel	NA	NA	intergenic	10738
chr14	120324793	120324900	diffreps_peak_00043488	6.67364	107	chr14:120324794-120325412+	2.38976	2.12014e-07	6.24711e-06	up	14_120724634_120724016_-618|16.50|17|64	PMID:25714049	NM_175341	Mbnl2	exonic	619
chr6	135152820	135152940	diffreps_peak_00117364	7.22854	120	chr6:135152821-135155289-	3.06581	5.90832e-08	2.34339e-06	up	6_135105307_135102839_-2468|17.11|10|26	PMID:25714049	NM_013546	Hebp1	exonic	320
chr5	97965681	97965760	diffreps_peak_00104372	5.02214	79	chr5:97938087-97980034-	11.6349	9.50302e-06	0.000145866	up	5_98409053_98367106_-41947|21.34|6|63	PMID:25714049	NM_133738	Antxr2	exonic	789
chr5	115441327	115441445	diffreps_peak_00106044	7.42285	118	chr5:115440485-115441445+	3.42332	3.77703e-08	1.69686e-06	up	mmu_circ_0001393	circBase	NM_008629	Msi1	exonic	201
chr16	36014001	36014200	diffreps_peak_00052884	5.44655	199	chr16:36000182-36072137+	63.8	3.57644e-06	6.33664e-05	up	NA	novel	NM_008465	Kpna1	sense overlapping	71956
chr17	27193301	27193520	diffreps_peak_00057484	6.14901	219	chr17:27190220-27199438-	25.5152	7.09562e-07	1.64088e-05	up	NA	novel	NM_146075	Lemd2	sense overlapping	9219
chr9	92573470	92573607	diffreps_peak_00143039	6.46567	137	chr9:92571255-92584603+	2.29641	3.42236e-07	9.12102e-06	up	NA	novel	NM_011961	Plod2	exonic	506
chr6	128365657	128365880	diffreps_peak_00117158	6.04253	223	chr6:128365658-128400301+	3.32627	9.06723e-07	2.00856e-05	up	NA	novel	NM_008021	Foxm1	sense overlapping	34644
chrY	90793041	90793780	diffreps_peak_00149579	5.74079	739	chrY:90736914-90819638+	2.04833	1.81639e-06	3.58814e-05	up	NA	novel	NM_133362	Erdr1	sense overlapping	82725
chr9	31333501	31333740	diffreps_peak_00138885	10.3492	239	chr9:31325627-31337422+	109.1	4.47547e-11	1.37659e-08	up	NA	novel	NM_001080817	Prdm10	sense overlapping	11796
chr12	29597081	29597340	diffreps_peak_00028248	5.26813	259	chr12:29597011-29601700+	52.8	5.39353e-06	8.94327e-05	up	NA	novel	AK012660	NA	intronic	4690
chr11	32511241	32511680	diffreps_peak_00018210	7.35091	439	chr11:32499225-32518294+	73.8	4.45751e-08	1.91325e-06	up	NA	novel	NM_173784	Ubtd2	sense overlapping	19070
chr12	98688681	98689100	diffreps_peak_00031611	6.03013	419	chr12:98682519-98689628-	2.80989	9.32969e-07	2.05135e-05	up	NA	novel	NM_011877	Ptpn21	exonic	1799
chr12	111097681	111097880	diffreps_peak_00032667	6.85691	199	chr12:111093081-111111970+	8.2028	1.39026e-07	4.46469e-06	up	NA	novel	NM_198023	Rcor1	sense overlapping	18890
chr10	93264879	93265080	diffreps_peak_00014615	5.65995	201	chr10:93264880-93284977-	2.2805	2.18799e-06	4.20621e-05	up	NA	novel	NM_013508	Elk3	exonic	1010
chr14	75717108	75717197	diffreps_peak_00042197	6.62801	89	chr14:75717109-75727813-	69.9	2.35502e-07	6.7693e-06	up	NA	novel	NM_177381	Cog3	exonic	531
chr15	99819493	99819840	diffreps_peak_00049577	6.50548	347	chr15:99819494-99826837-	2.53539	3.1226e-07	8.46367e-06	up	15_99657268_99649925_-7343|20.76|5|9	PMID:25714049	NM_001113545	Lima1	exonic	511
chr9	114384821	114384867	diffreps_peak_00144731	6.38696	46	chr9:114381586-114384867-	2.73961	4.10246e-07	1.05263e-05	up	NA	novel	NM_019922	Crtap	exonic	301
chr17	10212027	10212040	diffreps_peak_00056265	9.84484	13	chr17:10212028-10212177-	4.0409	1.42943e-10	3.18637e-08	up	NA	novel	ENSMUST00000097414	Qk	intronic	150
chr15	98076549	98076700	diffreps_peak_00049224	6.53198	151	chr15:98045303-98087133-	2.1498	2.93781e-07	8.04581e-06	up	NA	novel	NM_144851	Senp1	exonic	1904
chr2	77085341	77085540	diffreps_peak_00075552	11.3379	199	chr2:77074836-77173607-	10.9626	4.59344e-12	3.32546e-09	up	2_77011664_76912893_-98771|19.64|9|10	PMID:25714049	NM_001025576	Ccdc141	sense overlapping	98772
chr13	15641081	15641274	diffreps_peak_00033798	6.01933	193	chr13:15641069-15662530+	2.82197	9.56465e-07	2.09489e-05	up	13_15754363_15732902_-21461|19.61|2|2	PMID:25714049	NM_008130	Gli3	exonic	1024
chr5	131196117	131196180	diffreps_peak_00107943	9.35763	63	chr5:131196118-131196267-	18.8947	4.38908e-10	7.50654e-08	up	NA	novel	ENSMUST00000086023	Wbscr17	intronic	150
chr1	165602801	165603000	diffreps_peak_00007321	5.58865	199	chr1:165593391-165608604-	13.5714	2.5784e-06	4.80976e-05	up	1_167538735_167523522_-15213|13.67|4|4	PMID:25714049	NM_001001880	Mpzl1	sense overlapping	15214
chr10	4356241	4356285	diffreps_peak_00009331	8.57186	44	chr10:4356112-4356285+	3.64592	2.68001e-09	2.86472e-07	up	NA	novel	NM_031185	Akap12	sense overlapping	174
chr7	49022281	49022580	diffreps_peak_00122179	9.20918	299	chr7:48992875-49088987+	143.1	6.17756e-10	9.85755e-08	up	NA	novel	ENSMUST00000183659	Nav2	intronic	96113
chr14	18593601	18594140	diffreps_peak_00038794	5.85162	539	chr14:18574307-18630431-	4.01488	1.40729e-06	2.89352e-05	up	14_19462945_19406821_-56124|17.78|8|17	PMID:25714049	NM_144839	Ube2e2	sense overlapping	56125
chr8	72874781	72875140	diffreps_peak_00132949	6.8538	359	chr8:72814574-72885803-	81	1.40024e-07	4.48853e-06	up	NA	novel	NM_010687	Large	sense overlapping	71230
chr1	119757841	119758200	diffreps_peak_00004887	6.1899	359	chr1:119741355-119773269-	7.49367	6.45804e-07	1.51552e-05	up	NA	novel	NM_019933	Ptpn4	sense overlapping	31915
chr2	163322771	163322933	diffreps_peak_00080713	8.03513	162	chr2:163322772-163322933+	2.19172	9.22301e-09	6.52557e-07	up	NA	novel	ENSMUST00000148599	Tox2	intronic	162
chrY	90758561	90758880	diffreps_peak_00149555	6.24095	319	chrY:90736914-90819638+	8.18018	5.74182e-07	1.37772e-05	up	NA	novel	NM_133362	Erdr1	sense overlapping	82725
chr11	90657713	90657831	diffreps_peak_00023161	6.71736	118	chr11:90656351-90661889-	3.80105	1.91706e-07	5.77043e-06	up	mmu_circ_0003548	circBase	NM_028011	Tom1l1	exonic	413
chr8	64604807	64605038	diffreps_peak_00131977	9.21747	231	chr8:64604808-64605038-	2.42329	6.06078e-10	9.71559e-08	up	NA	novel	ENSMUST00000048967	Cpe	intronic	231
chr11	8492761	8493040	diffreps_peak_00017256	8.86486	279	chr11:8492093-8493337-	3.1655	1.36502e-09	1.78046e-07	up	NA	novel	NM_001083587	Tns3	exonic	1245
chr9	15037481	15037720	diffreps_peak_00137656	5.26137	239	chr9:15028716-15043024-	62	5.47812e-06	9.0651e-05	up	NA	novel	ENSMUST00000056755	Panx1	intronic	14309
chr11	4658214	4658325	diffreps_peak_00016857	6.49199	111	chr11:4640383-4659384+	4.39232	3.22111e-07	8.66733e-06	up	NA	novel	NM_029291	Ascc2	exonic	850
chr15	78882127	78882203	diffreps_peak_00047171	8.04759	76	chr15:78881038-78889868+	3.98723	8.96221e-09	6.42584e-07	up	NA	novel	NM_145929	Gga1	exonic	1047
chr15	58104430	58104566	diffreps_peak_00045816	7.26761	136	chr15:58099711-58111276-	4.22777	5.39992e-08	2.20132e-06	up	NA	novel	NM_027435	Atad2	exonic	1814
chr8	80788981	80789094	diffreps_peak_00133236	8.02447	113	chr8:80784627-80800395-	3.41365	9.45205e-09	6.64733e-07	up	8_83324294_83308526_-15768|17.58|11|16	PMID:25714049	NM_021356	Gab1	exonic	1516
chr5	106661961	106662320	diffreps_peak_00104948	7.90368	359	chr5:106618071-106666845-	3.04508	1.24829e-08	7.92231e-07	up	mmu_circ_0001380	circBase	NM_026856	Zfp644	sense overlapping	48775
chr11	119671277	119671580	diffreps_peak_00026664	8.03828	303	chr11:119671278-119671757+	5.83432	9.15621e-09	6.4927e-07	up	11_119533071_119532592_-479|20.04|4|8	PMID:25714049	NM_028898	Rptor	sense overlapping	480
chr3	107479321	107479520	diffreps_peak_00087280	5.37447	199	chr3:107479289-107480367-	2.7073	4.22215e-06	7.2693e-05	up	NA	novel	ENSMUST00000029499	Slc6a17	intronic	1079
chr3	89043118	89043240	diffreps_peak_00085682	7.26545	122	chr3:89033259-89058640+	3.06522	5.42687e-08	2.2067e-06	up	NA	novel	NM_138679	Ash1l	exonic	1260
chr11	117742281	117742520	diffreps_peak_00026211	6.85041	239	chr11:117732168-117761006+	10.1417	1.41121e-07	4.51357e-06	up	NA	novel	NM_198022	Tnrc6c	sense overlapping	28839
chr15	97808961	97810300	diffreps_peak_00049198	5.82937	1339	chr15:97795754-97810911-	2.48921	1.48125e-06	3.02147e-05	up	NA	novel	NM_019572	Hdac7	sense overlapping	15158
chr4	70352668	70352788	diffreps_peak_00092398	11.5733	120	chr4:70302084-70352788-	2.81333	2.67146e-12	2.32409e-09	up	NA	novel	NM_145990	Cdk5rap2	exonic	979
chr11	21121516	21121691	diffreps_peak_00017567	5.40285	175	chr11:21121517-21121691-	5.10112	3.95499e-06	6.88521e-05	up	NA	novel	NM_023324	Peli1	antisense	175
chr1	191369521	191370920	diffreps_peak_00009040	8.02646	1399	chr1:191368641-191372666+	3.40963	9.40894e-09	6.62573e-07	up	NA	novel	NM_144880	Ppp2r5a	antisense	4026
chr3	53652061	53652329	diffreps_peak_00084137	5.20913	268	chr3:53652045-53652329-	2.13813	6.17831e-06	0.000100379	up	NA	novel	NM_172862	Frem2	sense overlapping	285
chrX	10526421	10526760	diffreps_peak_00145712	6.9822	339	chrX:10522506-10531524+	5.77652	1.04185e-07	3.56676e-06	up	NA	novel	ENSMUST00000076354	Tspan7	intronic	9019
chr11	102802761	102802916	diffreps_peak_00024576	9.81818	155	chr11:102800612-102802916-	2.60164	1.51991e-10	3.33871e-08	up	11_102664230_102661926_-2304|19.06|8|20	PMID:25714049	NM_008122	Gjc1	sense overlapping	2305
chr17	35689741	35689913	diffreps_peak_00058803	7.12979	172	chr17:35688539-35690180-	4.30267	7.41667e-08	2.79735e-06	up	17_35827125_35825484_-1641|19.36|2|2	PMID:25714049	NM_007584	Ddr1	exonic	670
chrY	90760521	90760920	diffreps_peak_00149561	5.98471	399	chrY:90736914-90819638+	2.39887	1.03584e-06	2.24182e-05	up	NA	novel	NM_133362	Erdr1	sense overlapping	82725
chr17	3168221	3168560	diffreps_peak_00055641	8.2944	339	chr17:3145075-3198223+	49.0303	5.07686e-09	4.34329e-07	up	NA	novel	NM_134123	Scaf8	sense overlapping	53149
chr18	5673861	5674360	diffreps_peak_00062386	6.05018	499	chr18:5633204-5705243+	2.86879	8.90888e-07	1.97834e-05	up	18_5705241_5633202_-72039|12.53|19|120	PMID:25714049	NM_011546	Zeb1	sense overlapping	72040
chr5	110663841	110664200	diffreps_peak_00105231	6.13326	359	chr5:110653223-110720843-	9.76923	7.35761e-07	1.69102e-05	up	NA	novel	NM_029337	Ep400	sense overlapping	67621
chr3	135240947	135241106	diffreps_peak_00088296	7.61951	159	chr3:135237503-135241106+	6.06177	2.40154e-08	1.22574e-06	up	NA	novel	NM_173762	Cenpe	exonic	1095
chr15	57804961	57805069	diffreps_peak_00045779	9.08913	108	chr15:57804903-57805069+	4.59459	8.14466e-10	1.20675e-07	up	NA	novel	ENSMUST00000096430	Zhx2	intronic	167
chr16	45757098	45757245	diffreps_peak_00053621	8.12344	147	chr16:45757099-45789117-	8.70878	7.52601e-09	5.71412e-07	up	16_45789230_45757212_-32018|13.95|2|2	PMID:25714049	NM_153412	Phldb2	exonic	1314
chr7	45217371	45217540	diffreps_peak_00121743	9.94136	169	chr7:45217372-45218145+	3.02406	1.14457e-10	2.71904e-08	up	NA	novel	NM_011565	Tead2	sense overlapping	774
chr4	118264181	118264420	diffreps_peak_00094642	5.7596	239	chr4:118257612-118269317-	15.9649	1.73939e-06	3.46509e-05	up	NA	novel	NM_011213	Ptprf	sense overlapping	11706
chr6	128349361	128349820	diffreps_peak_00117151	7.70025	459	chr6:128333833-128359354+	3.33881	1.99413e-08	1.08181e-06	up	NA	novel	ENSMUST00000180586	Gm26770	sense overlapping	25522
chr4	21975281	21975800	diffreps_peak_00090015	6.00265	519	chr4:21948692-21993632+	2.44615	9.93906e-07	2.16447e-05	up	mmu_circ_0011526	circBase	NM_175234	Faxc	sense overlapping	44941
chr3	34649201	34650920	diffreps_peak_00083663	8.32385	1719	chr3:34638358-34653284-	2.16765	4.74403e-09	4.12616e-07	up	NA	novel	NM_011443	Sox2	antisense	14927
chr19	34837881	34838540	diffreps_peak_00069212	7.48119	659	chr19:34812278-34841109-	4.61949	3.30223e-08	1.54368e-06	up	19_34915599_34886768_-28831|13.64|18|41	PMID:25714049	NM_023792	Pank1	sense overlapping	28832
chr9	37382361	37382455	diffreps_peak_00139259	6.70966	94	chr9:37382356-37383454+	2.51117	1.95138e-07	5.85213e-06	up	9_37191039_37189941_-1098|23.52|15|55	PMID:25714049	NM_175189	Hepacam	exonic	174
chr4	132369733	132369820	diffreps_peak_00096448	7.71723	87	chr4:132363731-132371120-	4.70488	1.91767e-08	1.05081e-06	up	NA	novel	NM_175306	Phactr4	exonic	1049
chr10	42799781	42800120	diffreps_peak_00011064	6.02511	339	chr10:42783442-42829039+	6.4472	9.43812e-07	2.07152e-05	up	10_42548845_42503248_-45597|19.00|12|29	PMID:25714049	NM_153055	Sec63	sense overlapping	45598
chr4	34650221	34650251	diffreps_peak_00090370	5.43181	30	chr4:34647786-34652208+	12.8246	3.69992e-06	6.52084e-05	up	NA	novel	NM_181406	Rars2	exonic	234
chr9	41448681	41448880	diffreps_peak_00139399	5.42521	199	chr9:41431754-41463649+	6.05618	3.75656e-06	6.59964e-05	up	NA	novel	AK045205	NA	intronic	31896
chr18	24664781	24664980	diffreps_peak_00063055	8.28977	199	chr18:24659990-24709773+	105.9	5.13131e-09	4.37075e-07	up	NA	novel	NM_026779	Mocos	sense overlapping	49784
chr1	165906461	165906900	diffreps_peak_00007347	5.24205	439	chr1:165875382-165915163-	3.34662	5.72724e-06	9.42312e-05	up	NA	novel	NM_011137	Pou2f1	sense overlapping	39782
chr7	80346321	80346520	diffreps_peak_00123884	7.48316	199	chr7:80343935-80348120+	12.825	3.28733e-08	1.54138e-06	up	NA	novel	NM_026812	Hddc3	sense overlapping	4186
chr1	24612921	24613072	diffreps_peak_00000785	5.70267	151	chr1:24612922-24613072-	4.16672	1.98305e-06	3.86465e-05	up	NA	novel	AK141672	NA	antisense	151
chr4	143139401	143139760	diffreps_peak_00098140	7.0834	359	chr4:143135020-143142234-	86	8.25274e-08	3.01697e-06	up	NA	novel	AK135872	NA	intronic	7215
chr11	19954781	19954980	diffreps_peak_00017454	8.53759	199	chr11:19949027-20015707+	119.1	2.90006e-09	2.96124e-07	up	NA	novel	NM_033523	Spred2	sense overlapping	66681
chr3	55116983	55117180	diffreps_peak_00084184	7.94016	197	chr3:55116984-55117795+	2.41568	1.14774e-08	7.49686e-07	up	NA	novel	NM_144895	Spg20	exonic	812
chr10	122680756	122680880	diffreps_peak_00015929	7.36943	124	chr10:122680757-122680988+	3.67806	4.27144e-08	1.85188e-06	up	NA	novel	ENSMUST00000067918	Ppm1h	intronic	232
chr19	17119734	17119740	diffreps_peak_00068481	9.81638	6	chr19:17119735-17119886+	5.10492	1.52625e-10	3.34101e-08	up	NA	novel	uc008gxf.2	Prune2	intronic	152
chr17	74209581	74210200	diffreps_peak_00061232	6.85316	619	chr17:74201057-74245087-	2.787	1.40231e-07	4.49396e-06	up	17_74644427_74600397_-44030|11.47|10|17	PMID:25714049	NM_133771	Memo1	sense overlapping	44031
chr2	143983561	143983880	diffreps_peak_00078980	6.34193	319	chr2:143974461-143988586-	5.52344	4.55062e-07	1.14511e-05	up	NA	novel	NM_024281	Rrbp1	sense overlapping	14126
chr4	82323544	82323710	diffreps_peak_00092757	7.16121	166	chr4:82310303-82353643-	2.71232	6.89904e-08	2.63721e-06	up	NA	novel	NM_001113209	Nfib	exonic	898
chr5	122579741	122580140	diffreps_peak_00106943	5.8752	399	chr5:122540304-122611107-	69.6	1.33289e-06	2.76722e-05	up	5_123061116_122990313_-70803|20.00|4|9	PMID:25714049	NM_009879	Ift81	sense overlapping	70804
chr15	84804759	84805110	diffreps_peak_00048132	10.5419	351	chr15:84803454-84808158-	2.18108	2.87156e-11	9.9423e-09	up	NA	novel	NR_030731	Phf21b	exonic	576
chr18	5062361	5062405	diffreps_peak_00062340	7.22236	44	chr18:5062162-5074004+	3.99489	5.99288e-08	2.36695e-06	up	NA	novel	NM_153153	Svil	exonic	1165
chr6	118404255	118404357	diffreps_peak_00116200	7.82269	102	chr6:118404256-118413919-	2.16124	1.50423e-08	8.92693e-07	up	NA	novel	NM_194339	Bms1	exonic	1651
chr10	14015341	14015620	diffreps_peak_00009878	7.84242	279	chr10:14004198-14066684+	7.72558	1.43741e-08	8.67046e-07	up	mmu_circ_0002087	circBase	NM_010437	Hivep2	sense overlapping	62487
chr5	137311941	137312043	diffreps_peak_00108874	10.4182	102	chr5:137311874-137312233-	3.27503	3.81746e-11	1.21957e-08	up	5_137753461_137753102_-359|14.00|17|51	PMID:25714049	NM_011639	Trip6	exonic	264
chr2	27988901	27989175	diffreps_peak_00072629	8.30056	274	chr2:27980491-27989175+	20.3651	5.00539e-09	4.30371e-07	up	NA	novel	NM_015734	Col5a1	sense overlapping	8685
chr2	153773561	153773780	diffreps_peak_00079635	7.37736	219	chr2:153746256-153787752+	90.1	4.19416e-08	1.83239e-06	up	NA	novel	NM_007896	Mapre1	sense overlapping	41497
chr10	8786101	8786460	diffreps_peak_00009546	5.07203	359	chr10:8780519-8814457+	2.29249	8.47174e-06	0.000131904	up	NA	novel	NM_175155	Sash1	antisense	33939
chr10	12720818	12720942	diffreps_peak_00009786	6.95574	124	chr10:12697989-12720942-	3.21426	1.10728e-07	3.74743e-06	up	NA	novel	NM_011682	Utrn	exonic	1264
chr1	186737587	186737685	diffreps_peak_00008824	5.22176	98	chr1:186736116-186739863-	2.38971	6.00117e-06	9.78535e-05	up	1_188563742_188559995_-3747|19.47|15|35	PMID:25714049	NM_026041	Rrp15	exonic	557
chrX	93626601	93626612	diffreps_peak_00147324	5.5091	11	chrX:93620505-93626612-	3.24701	3.0967e-06	5.62292e-05	up	X_90871951_90865844_-6107|13.56|19|43	PMID:25714049	NM_008892	Pola1	exonic	303
chr11	6307541	6307760	diffreps_peak_00017137	8.55488	219	chr11:6307263-6308051+	122.9	2.78692e-09	2.90779e-07	up	NA	novel	ENSMUST00000003461	Ogdh	intronic	789
chr10	25484361	25484380	diffreps_peak_00010282	8.9006	19	chr10:25441573-25495591+	3.22741	1.25719e-09	1.66611e-07	up	NA	novel	NM_013511	Epb4.1l2	exonic	2006
chr2	131542781	131543140	diffreps_peak_00078453	8.4421	359	chr2:131511984-131555847+	111.4	3.61325e-09	3.42984e-07	up	NA	novel	NM_145533	Smox	sense overlapping	43864
chr13	21753261	21753674	diffreps_peak_00034020	5.27268	413	chr13:21721667-21753674-	2.24781	5.33733e-06	8.89042e-05	up	NA	novel	NM_178183	Hist1h2ak	sense overlapping	32008
chr5	8083161	8083580	diffreps_peak_00099800	7.71767	419	chr5:8082231-8088068-	5.09361	1.91572e-08	1.05077e-06	up	NA	novel	NM_001098225	Adam22	sense overlapping	5838
chr8	39063401	39063700	diffreps_peak_00131089	10.937	299	chr8:39058059-39071516+	12.6905	1.15608e-11	5.62149e-09	up	NA	novel	NM_030254	Tusc3	sense overlapping	13458
chr15	77774634	77775169	diffreps_peak_00047025	6.39574	535	chr15:77774635-77775169-	2.80856	4.0203e-07	1.03543e-05	up	NA	novel	NM_022410	Myh9	sense overlapping	535
chr2	31077385	31077540	diffreps_peak_00073099	9.57967	155	chr2:31077386-31077620-	3.86773	2.63228e-10	5.04077e-08	up	NA	novel	ENSMUST00000073879	Fnbp1	intronic	235
chr5	24429839	24430000	diffreps_peak_00100701	7.541	161	chr5:24429840-24430021+	2.79997	2.87737e-08	1.39605e-06	up	NA	novel	NM_009207	Slc4a2	sense overlapping	182
chr7	73507805	73507913	diffreps_peak_00123466	6.76534	108	chr7:73490479-73519708-	2.42207	1.71654e-07	5.27247e-06	up	7_80664594_80635365_-29229|12.39|10|21	PMID:25714049	NM_001081345	Chd2	exonic	1938
chr8	93965901	93966360	diffreps_peak_00134426	7.81095	459	chr8:93953975-93967083+	2.56768	1.54543e-08	9.08448e-07	up	NA	novel	NM_010308	Gnao1	sense overlapping	13109
chr2	37611881	37612240	diffreps_peak_00073911	10.1938	359	chr2:37580673-37657739-	46.2653	6.40037e-11	1.76359e-08	up	2_37513259_37436193_-77066|17.99|8|9	PMID:25714049	NM_009261	Strbp	sense overlapping	77067
chr4	138221601	138221980	diffreps_peak_00097421	6.52758	379	chr4:138221526-138241736+	2.02723	2.96768e-07	8.11977e-06	up	NA	novel	NM_010470	Hp1bp3	sense overlapping	20211
chr7	49044781	49045120	diffreps_peak_00122187	7.48089	339	chr7:48992875-49088987+	5.34085	3.3045e-08	1.54437e-06	up	NA	novel	ENSMUST00000183659	Nav2	intronic	96113
chr5	51498033	51498228	diffreps_peak_00102629	7.0983	195	chr5:51490017-51498228-	2.07195	7.97437e-08	2.94939e-06	up	mmu_circ_0012681	circBase	NM_008904	Ppargc1a	exonic	646
chr17	6145041	6145420	diffreps_peak_00055904	6.17938	379	chr17:6137211-6185298+	6.26957	6.61642e-07	1.54689e-05	up	17_6185298_6137211_-48087|18.69|23|202	PMID:25714049	NM_054040	Tulp4	sense overlapping	48088
chrY	90747621	90747860	diffreps_peak_00149553	6.39728	239	chrY:90736914-90819638+	13.4603	4.0061e-07	1.03245e-05	up	NA	novel	NM_133362	Erdr1	sense overlapping	82725
chr7	16533101	16533600	diffreps_peak_00119057	13.0057	499	chr7:16495622-16561975-	9.24082	9.86993e-14	8.98318e-10	up	NA	novel	NM_172739	Arhgap35	sense overlapping	66354
chr1	153227281	153227540	diffreps_peak_00006476	11.0123	259	chr1:153226470-153227561-	2.32093	9.72006e-12	5.04812e-09	up	NA	novel	ENSMUST00000161744	Lamc1	intronic	1092
chr2	84650489	84650725	diffreps_peak_00075781	6.61065	236	chr2:84650490-84650725-	2.25362	2.45102e-07	6.98554e-06	up	NA	novel	NM_007615	Ctnnd1	sense overlapping	236
chr7	140143737	140143818	diffreps_peak_00128321	8.21976	81	chr7:140143738-140144720+	28.7879	6.02896e-09	4.87606e-07	up	NA	novel	NM_199301	Mtg1	exonic	229
chr8	11376661	11376900	diffreps_peak_00129422	5.38498	239	chr8:11313455-11398690+	14.2456	4.12113e-06	7.12443e-05	up	NA	novel	NM_009932	Col4a2	sense overlapping	85236
chr2	118814245	118814380	diffreps_peak_00077249	7.0284	135	chr2:118814246-118823786+	5.39574	9.36692e-08	3.31193e-06	up	NA	novel	NM_026412	Knstrn	sense overlapping	9541
chr1	155189781	155190160	diffreps_peak_00006613	6.37892	379	chr1:155173986-155197435-	14.8772	4.17903e-07	1.06635e-05	up	NA	novel	NM_021433	Stx6	antisense	23450
chr9	70322391	70322480	diffreps_peak_00142137	5.91546	89	chr9:70316592-70327276+	6.04367	1.2149e-06	2.55732e-05	up	9_70175083_70164399_-10684|16.92|11|12	PMID:25714049	NM_181072	Myo1e	exonic	578
chr4	72147921	72148240	diffreps_peak_00092443	5.62504	319	chr4:72145351-72158248-	55.3	2.37116e-06	4.47823e-05	up	NA	novel	NM_011599	Tle1	sense overlapping	12898
chr15	25780973	25781220	diffreps_peak_00044493	6.64235	247	chr15:25778081-25793246+	2.74387	2.27852e-07	6.58566e-06	up	NA	novel	NM_019472	Myo10	exonic	1739
chr16	17479501	17479960	diffreps_peak_00051443	7.83665	459	chr16:17469280-17483769+	95.6	1.45664e-08	8.73595e-07	up	NA	novel	NM_007764	Crkl	sense overlapping	14490
chr17	10298061	10298520	diffreps_peak_00056276	6.24777	459	chr17:10282839-10302960-	2.70763	5.6523e-07	1.36271e-05	up	NA	novel	NM_021881	Qk	sense overlapping	20122
chr3	27627081	27627680	diffreps_peak_00083119	8.81703	599	chr3:27620605-27643085-	6.76957	1.52393e-09	1.92325e-07	up	NA	novel	NM_173182	Fndc3b	sense overlapping	22481
chr7	66387961	66388380	diffreps_peak_00123246	10.6338	419	chr7:66381452-66402135-	6.4073	2.32369e-11	8.81454e-09	up	NA	novel	AK135157	NA	intronic	20684
chr11	78231501	78231740	diffreps_peak_00022046	6.20924	239	chr11:78231080-78233610-	2.49342	6.17671e-07	1.46178e-05	up	NA	novel	NM_009297	Supt6	sense overlapping	2531
chr2	72950261	72950454	diffreps_peak_00075378	6.4776	193	chr2:72949454-72950454-	17.7368	3.32965e-07	8.91466e-06	up	NA	novel	ENSMUST00000066003	Sp3	intronic	1001
chr6	120743782	120743866	diffreps_peak_00116520	5.81826	84	chr6:120738156-120754740+	10.5288	1.51965e-06	3.09089e-05	up	NA	novel	NM_001128151	Cecr2	exonic	668
chr15	97806201	97806400	diffreps_peak_00049195	7.71365	199	chr15:97795754-97810911-	19.5667	1.93354e-08	1.05458e-06	up	NA	novel	NM_019572	Hdac7	sense overlapping	15158
chr15	95943397	95943475	diffreps_peak_00049053	7.85882	78	chr15:95920244-95956021+	3.67779	1.38415e-08	8.46155e-07	up	NA	novel	NM_175344	Ano6	exonic	1148
chr10	121371143	121371203	diffreps_peak_00015808	5.23974	60	chr10:121371144-121374564+	2.40909	5.75791e-06	9.44458e-05	up	NA	novel	NM_029364	Gns	exonic	267
chr15	97810621	97810911	diffreps_peak_00049199	6.98403	290	chr15:97795754-97810911-	2.58024	1.03746e-07	3.55359e-06	up	NA	novel	NM_019572	Hdac7	sense overlapping	15158
chr4	152108180	152108330	diffreps_peak_00098986	5.58409	150	chr4:152107712-152108330+	2.28436	2.60563e-06	4.84839e-05	up	NA	novel	NR_104381	Plekhg5	exonic	411
chr2	31035499	31035620	diffreps_peak_00073085	8.84727	121	chr2:31035500-31035707-	3.41411	1.42144e-09	1.8331e-07	up	NA	novel	ENSMUST00000073879	Fnbp1	intronic	208
chr8	45770545	45770590	diffreps_peak_00131288	6.38298	45	chr8:45741487-45790025+	2.16483	4.14018e-07	1.05848e-05	up	NA	novel	NM_172752	Sorbs2	exonic	1009
chr9	59450061	59450320	diffreps_peak_00141178	9.60542	259	chr9:59426123-59467864-	13.0673	2.48076e-10	4.80159e-08	up	NA	novel	NM_019927	Arih1	sense overlapping	41742
chr4	8751661	8752840	diffreps_peak_00089566	9.20938	1179	chr4:8751324-8753148+	3.23398	6.1747e-10	9.85755e-08	up	4_8680295_8678471_-1824|20.33|6|12	PMID:25714049	NM_001277149	Chd7	exonic	1825
chr19	8999661	9000220	diffreps_peak_00068087	6.27716	559	chr19:8999662-9002115+	3.472	5.28249e-07	1.28937e-05	up	NA	novel	NM_009643	Ahnak	sense overlapping	2454
chr7	66381601	66381880	diffreps_peak_00123245	8.01871	279	chr7:66381452-66402135-	7.86047	9.57832e-09	6.70759e-07	up	NA	novel	AK135157	NA	intronic	20684
chr10	84402421	84402800	diffreps_peak_00014003	9.91571	379	chr10:84392256-84422227-	6.31609	1.2142e-10	2.83397e-08	up	NA	novel	NM_001004363	Nuak1	sense overlapping	29972
chr17	10282881	10283260	diffreps_peak_00056273	5.88945	379	chr17:10282839-10302960-	2.25962	1.28988e-06	2.69426e-05	up	NA	novel	NM_021881	Qk	sense overlapping	20122
chr6	125124081	125124328	diffreps_peak_00116922	5.54899	247	chr6:125123998-125124328+	15.7368	2.82497e-06	5.19611e-05	up	NA	novel	ENSMUST00000056889	Chd4	intronic	331
chr7	127585144	127585261	diffreps_peak_00127490	6.64551	117	chr7:127584821-127585524-	2.64075	2.26197e-07	6.55024e-06	up	NA	novel	NM_001033040	Gm166	exonic	342
chr10	25488950	25489093	diffreps_peak_00010283	10.345	143	chr10:25441573-25495591+	3.16047	4.51826e-11	1.38301e-08	up	NA	novel	NM_013511	Epb4.1l2	exonic	2006
chr5	92883357	92883400	diffreps_peak_00104200	5.09813	43	chr5:92883358-92883512+	4.10882	7.97752e-06	0.000125251	up	NA	novel	ENSMUST00000113054	Shroom3	intronic	155
chr11	88078461	88078555	diffreps_peak_00022893	8.08208	94	chr11:88073057-88078555+	2.82017	8.27781e-09	6.08093e-07	up	mmu_circ_0000309	circBase	NM_016686	Vezf1	exonic	1096
chr6	36789141	36789400	diffreps_peak_00111840	6.79072	259	chr6:36782581-36804640-	3.19839	1.61911e-07	5.02278e-06	up	NA	novel	ENSMUST00000101534	Ptn	intronic	22060
chr7	115777050	115777258	diffreps_peak_00126395	6.79658	208	chr7:115777051-115801609-	2.66512	1.59741e-07	4.96886e-06	up	7_122945123_122920565_-24558|19.36|5|6	PMID:25714049	NM_011445	Sox6	exonic	449
chr3	135239821	135239948	diffreps_peak_00088295	7.49044	127	chr3:135237503-135241106+	3.49142	3.23267e-08	1.52336e-06	up	NA	novel	NM_173762	Cenpe	exonic	1095
chr4	97957761	97958120	diffreps_peak_00093148	5.59859	359	chr4:97944867-98041679+	4.2497	2.52003e-06	4.71298e-05	up	NA	novel	NM_010905	Nfia	sense overlapping	96813
chr1	23866141	23866560	diffreps_peak_00000759	7.5193	419	chr1:23846433-23871518-	2.11658	3.02486e-08	1.45094e-06	up	NA	novel	NM_028534	Smap1	sense overlapping	25086
chr2	73437112	73437274	diffreps_peak_00075425	8.15937	162	chr2:73437113-73437274-	2.36981	6.92838e-09	5.38608e-07	up	NA	novel	NM_153138	Wipf1	sense overlapping	162
chr7	115642897	115643060	diffreps_peak_00126374	5.93021	163	chr7:115642898-115643203-	2.3605	1.17434e-06	2.48777e-05	up	NA	novel	ENSMUST00000072804	Sox6	intronic	306
chrX	23774521	23774820	diffreps_peak_00146047	5.54554	299	chrX:23756440-23805013+	10.4889	2.84747e-06	5.23119e-05	up	X_23382139_23333566_-48573|15.23|5|6	PMID:25714049	NM_175180	Wdr44	sense overlapping	48574
chr1	131160409	131160624	diffreps_peak_00005436	6.61109	215	chr1:131155168-131161402+	2.37951	2.44855e-07	6.9795e-06	up	NA	novel	NM_010709	Eif2d	exonic	616
chr9	37383380	37383454	diffreps_peak_00139260	6.45736	74	chr9:37382356-37383454+	2.73526	3.48852e-07	9.26126e-06	up	9_37191039_37189941_-1098|23.52|15|55	PMID:25714049	NM_175189	Hepacam	exonic	174
chr4	82320473	82320556	diffreps_peak_00092756	5.68015	83	chr4:82310303-82353643-	2.56724	2.08856e-06	4.03933e-05	up	NA	novel	NM_001113209	Nfib	exonic	898
chr1	126781631	126781760	diffreps_peak_00005205	11.6529	129	chr1:126781632-126781787-	23.0875	2.22387e-12	2.18415e-09	up	NA	novel	ENSMUST00000094609	Nckap5	intronic	156
chr13	15644293	15644440	diffreps_peak_00033799	11.1644	147	chr13:15641069-15662530+	3.37145	6.84872e-12	4.28793e-09	up	13_15754363_15732902_-21461|19.61|2|2	PMID:25714049	NM_008130	Gli3	exonic	1024
chr13	119472138	119472240	diffreps_peak_00038192	8.23938	102	chr13:119472139-119481030+	7.03846	5.76258e-09	4.75364e-07	up	mmu_circ_0004478	circBase	NM_026127	4833420G17Rik	exonic	750
chr13	98789861	98790080	diffreps_peak_00037355	6.73847	219	chr13:98789774-98796367-	3.64608	1.82612e-07	5.54734e-06	up	NA	novel	NM_172591	Fcho2	sense overlapping	6594
chr3	108012201	108012800	diffreps_peak_00087340	8.41881	599	chr3:107966279-108014863-	2.46725	3.8123e-09	3.57434e-07	up	NA	novel	NM_008183	Gstm2	sense overlapping	48585
chr8	17483661	17483880	diffreps_peak_00130199	7.62374	219	chr8:17473574-17510398-	8.15497	2.37829e-08	1.21795e-06	up	NA	novel	AK043289	NA	intronic	36825
chr10	24892561	24892659	diffreps_peak_00010214	5.61717	98	chr10:24873473-24902473+	10.4222	2.41449e-06	4.54906e-05	up	NA	novel	NM_027347	Med23	exonic	2448
chr2	150642501	150642700	diffreps_peak_00079239	7.0609	199	chr2:150625766-150644241-	5.59312	8.69165e-08	3.1261e-06	up	NA	novel	NM_080575	Acss1	sense overlapping	18476
chr11	89008861	89009100	diffreps_peak_00023069	7.37884	239	chr11:89004729-89016794+	5.43165	4.17984e-08	1.82814e-06	up	11_88878108_88866043_-12065|16.13|2|4	PMID:25714049	NM_009546	Trim25	sense overlapping	12066
chr4	132412981	132413380	diffreps_peak_00096459	8.12521	399	chr4:132410750-132506413-	3.59795	7.4953e-09	5.69953e-07	up	NA	novel	NM_026039	Med18	sense overlapping	95664
chr5	115433501	115433840	diffreps_peak_00106037	7.29311	339	chr5:115431960-115434881+	2.35329	5.09205e-08	2.11167e-06	up	NA	novel	NM_008629	Msi1	sense overlapping	2922
chr4	126560181	126560352	diffreps_peak_00095523	11.4354	171	chr4:126559208-126563984+	4.77411	3.66911e-12	2.84345e-09	up	4_126241228_126236452_-4776|19.74|2|3	PMID:25714049	NM_175554	Clspn	exonic	783
chr5	89091281	89091520	diffreps_peak_00104015	5.50098	239	chr5:89084642-89122559-	12.2105	3.15515e-06	5.69546e-05	up	NA	novel	NM_018760	Slc4a4	antisense	37918
chr1	55137301	55137660	diffreps_peak_00002108	6.87013	359	chr1:55136677-55152825+	7.72959	1.34854e-07	4.37515e-06	up	mmu_circ_0008802	circBase	NM_025283	Mob4	sense overlapping	16149
chr9	49534221	49534540	diffreps_peak_00140415	9.19606	319	chr9:49505440-49546308-	9.55245	6.36704e-10	1.00651e-07	up	NA	novel	NM_010875	Ncam1	sense overlapping	40869
chr1	14226181	14226400	diffreps_peak_00000342	6.90412	219	chr1:14208895-14231569-	78.6	1.24703e-07	4.11306e-06	up	NA	novel	NM_010164	Eya1	sense overlapping	22675
chr1	119764161	119764520	diffreps_peak_00004888	5.79548	359	chr1:119741355-119773269-	15.5263	1.60149e-06	3.23053e-05	up	NA	novel	NM_019933	Ptpn4	sense overlapping	31915
chr5	51495669	51495795	diffreps_peak_00102628	5.02614	126	chr5:51490017-51498228-	3.02925	9.41583e-06	0.000144774	up	mmu_circ_0012681	circBase	NM_008904	Ppargc1a	exonic	646
chr4	82327728	82327913	diffreps_peak_00092758	7.29596	185	chr4:82310303-82353643-	2.46259	5.05876e-08	2.10314e-06	up	NA	novel	NM_001113209	Nfib	exonic	898
chr8	90266441	90266640	diffreps_peak_00134164	5.65431	199	chr8:90257875-90270483+	18.6216	2.21663e-06	4.25383e-05	up	NA	novel	NM_172913	Tox3	antisense	12609
chr9	71885182	71885280	diffreps_peak_00142265	5.79086	98	chr9:71882717-71885288-	2.57763	1.6186e-06	3.25908e-05	up	NA	novel	NM_011544	Tcf12	exonic	456
chr12	53348241	53349680	diffreps_peak_00029067	5.65129	1439	chr12:53343286-53354434+	3.21786	2.23206e-06	4.27725e-05	up	NA	novel	uc007nnp.1	Npas3	intronic	11149
chr5	23450801	23451000	diffreps_peak_00100561	5.8692	199	chr5:23434234-23528062-	63.8	1.35145e-06	2.79429e-05	up	NA	novel	NM_009274	Srpk2	sense overlapping	93829
chr3	5242921	5243280	diffreps_peak_00082466	5.10164	359	chr3:5241670-5245645+	2.52839	7.91333e-06	0.000124391	up	3_5245645_5241670_-3975|19.83|12|28	PMID:25714049	NM_030708	Zfhx4	exonic	3055
chr5	113098701	113098900	diffreps_peak_00105670	5.62503	199	chr5:113090844-113183623-	55.9	2.3712e-06	4.47823e-05	up	NA	novel	NM_172884	2900026A02Rik	sense overlapping	92780
chr7	101391509	101391660	diffreps_peak_00125415	11.1257	151	chr7:101391510-101391714+	5.84543	7.48732e-12	4.50873e-09	up	NA	novel	ENSMUST00000084895	Arap1	intronic	205
chr16	33940621	33940900	diffreps_peak_00052550	5.39326	279	chr16:33940490-33949049+	2.7878	4.04334e-06	7.01501e-05	up	NA	novel	NM_010580	Itgb5	sense overlapping	8560
chr17	35688538	35688690	diffreps_peak_00058802	10.6991	152	chr17:35688539-35690180-	4.27194	1.99941e-11	7.88601e-09	up	17_35827125_35825484_-1641|19.36|2|2	PMID:25714049	NM_007584	Ddr1	exonic	670
chr2	152889145	152889322	diffreps_peak_00079489	6.59402	177	chr2:152885011-152889322+	2.89271	2.54673e-07	7.21786e-06	up	2_152715058_152710747_-4311|20.97|7|10	PMID:25714049	NM_028109	Tpx2	exonic	487
chr2	158039201	158039620	diffreps_peak_00080335	7.72236	419	chr2:158035996-158075084+	14.7133	1.89514e-08	1.04381e-06	up	2_157900820_157861732_-39088|15.94|2|2	PMID:25714049	NM_027434	Rprd1b	sense overlapping	39089
chr7	80114901	80115304	diffreps_peak_00123844	8.63683	403	chr7:80103182-80115304-	2.32799	2.30764e-09	2.59681e-07	up	NA	novel	NM_173011	Idh2	sense overlapping	12123
chr6	99435221	99435500	diffreps_peak_00115199	7.74767	279	chr6:99428789-99456580-	87.8	1.78784e-08	1.00196e-06	up	6_99406574_99378783_-27791|15.77|3|4	PMID:25714049	NM_053202	Foxp1	sense overlapping	27792
chr7	13282181	13282542	diffreps_peak_00118776	9.48453	361	chr7:13278928-13282542+	2.86596	3.27696e-10	6.00297e-08	up	NA	novel	NM_010715	Lig1	sense overlapping	3615
chr18	80970681	80970880	diffreps_peak_00066694	5.11522	199	chr18:80969275-80974629-	6.6755	7.66974e-06	0.000121068	up	NA	novel	NM_178280	Sall3	sense overlapping	5355
chr1	55695744	55695900	diffreps_peak_00002177	7.56893	156	chr1:55695745-55702133+	2.61829	2.6982e-08	1.33165e-06	up	mmu_circ_0000042	circBase	NM_001114663	Plcl1	exonic	2679
chr2	116012201	116012600	diffreps_peak_00077143	10.1369	399	chr2:115994226-116049198-	2.54752	7.29685e-11	1.94053e-08	up	NA	novel	NM_010825	Meis2	sense overlapping	54973
chr5	124272401	124272660	diffreps_peak_00107297	5.96354	259	chr5:124271523-124274649-	61	1.08757e-06	2.33044e-05	up	NA	novel	ENSMUST00000031344	Mphosph9	intronic	3127
chr6	5154061	5154260	diffreps_peak_00110487	7.0185	199	chr6:5100432-5159748+	5.48519	9.58297e-08	3.36761e-06	up	6_5109748_5050432_-59316|15.16|4|4	PMID:25714049	NM_181595	Ppp1r9a	sense overlapping	59317
chr10	96731241	96731760	diffreps_peak_00014823	5.10204	519	chr10:96727787-96740632+	2.67137	7.90599e-06	0.000124286	up	NA	novel	AK035940	NA	sense overlapping	12846
chr4	135332157	135332238	diffreps_peak_00096921	7.64198	81	chr4:135329373-135338078-	2.21429	2.28044e-08	1.18311e-06	up	NA	novel	NM_016799	Srrm1	exonic	588
chr13	3883121	3883246	diffreps_peak_00033274	6.10421	125	chr13:3882641-3883246-	3.11302	7.86659e-07	1.78709e-05	up	NA	novel	NM_019671	Net1	sense overlapping	606
chr17	67263341	67263720	diffreps_peak_00060797	8.08668	379	chr17:67262425-67270468-	11.9205	8.19076e-09	6.03409e-07	up	NA	novel	ENSMUST00000037974	Ptprm	intronic	8044
chr3	107758281	107758338	diffreps_peak_00087329	5.97093	57	chr3:107758184-107758338+	7.87313	1.06922e-06	2.30471e-05	up	NA	novel	NM_007778	Csf1	antisense	155
chr1	14253019	14253102	diffreps_peak_00000350	7.83029	83	chr1:14208895-14283198-	7.46739	1.47812e-08	8.82635e-07	up	1_14273279_14198976_-74303|16.84|4|4	PMID:25714049	NM_010164	Eya1	exonic	1001
chr5	125124769	125124860	diffreps_peak_00107520	7.35579	91	chr5:125118617-125124980-	2.20029	4.40764e-08	1.90137e-06	up	5_125605350_125598987_-6363|22.17|3|3	PMID:25714049	NM_011424	Ncor2	exonic	517
chr18	5073880	5074004	diffreps_peak_00062342	7.55794	124	chr18:5062162-5074004+	5.1875	2.76733e-08	1.35665e-06	up	NA	novel	NM_153153	Svil	exonic	1165
chr14	75333041	75333440	diffreps_peak_00042181	6.72816	399	chr14:75291569-75339489+	80.1	1.86999e-07	5.65293e-06	up	NA	novel	NM_026083	Zc3h13	sense overlapping	47921
chr10	84880812	84880974	diffreps_peak_00014084	5.51424	162	chr10:84868352-84880974+	2.98816	3.06025e-06	5.56489e-05	up	NA	novel	NM_027689	Rfx4	exonic	495
chr4	97978001	97978560	diffreps_peak_00093151	7.66252	559	chr4:97944867-98041679+	3.29728	2.1751e-08	1.14584e-06	up	NA	novel	NM_010905	Nfia	sense overlapping	96813
chr18	80971761	80972180	diffreps_peak_00066695	8.39513	419	chr18:80969275-80974629-	2.29859	4.02599e-09	3.69609e-07	up	NA	novel	NM_178280	Sall3	sense overlapping	5355
chr6	124915901	124916180	diffreps_peak_00116860	6.40506	279	chr6:124913793-124917775-	3.38391	3.93494e-07	1.01827e-05	up	NA	novel	NM_026988	Ptms	sense overlapping	3983
chr4	8785621	8785763	diffreps_peak_00089574	10.3238	142	chr4:8751324-8785763+	3.08151	4.74441e-11	1.42614e-08	up	4_8712910_8678471_-34439|19.33|5|14	PMID:25714049	NM_001277149	Chd7	exonic	2247
chr10	75266341	75266860	diffreps_peak_00012609	7.37813	519	chr10:75230682-75267589-	5.79619	4.18667e-08	1.82992e-06	up	NA	novel	NM_153406	Specc1l	antisense	36908
chr13	98806305	98806397	diffreps_peak_00037359	6.72082	92	chr13:98775821-98806397-	2.09111	1.90184e-07	5.732e-06	up	mmu_circ_0004939	circBase	NM_172591	Fcho2	exonic	763
chr6	119950621	119951118	diffreps_peak_00116480	6.685	497	chr6:119950507-119951118-	2.33658	2.06537e-07	6.11499e-06	up	NA	novel	NM_198703	Wnk1	sense overlapping	612
chr15	30333768	30334000	diffreps_peak_00044790	6.65642	232	chr15:30333769-30334019-	2.65364	2.20585e-07	6.4265e-06	up	NA	novel	NM_008729	Ctnnd2	antisense	251
chrY	90803281	90803480	diffreps_peak_00149583	7.13737	199	chrY:90736914-90819638+	2.97199	7.28835e-08	2.75945e-06	up	NA	novel	NM_133362	Erdr1	sense overlapping	82725
chr15	57821821	57822220	diffreps_peak_00045781	8.77251	399	chr15:57762646-57823751+	3.29159	1.68847e-09	2.07804e-07	up	NA	novel	NM_199449	Zhx2	exonic	2794
chr18	5062161	5062240	diffreps_peak_00062339	8.04042	79	chr18:5062162-5074004+	81.1	9.11136e-09	6.48109e-07	up	NA	novel	NM_153153	Svil	exonic	1165
chr6	119947974	119948140	diffreps_peak_00116479	10.3545	166	chr6:119943806-119951131-	2.2895	4.42099e-11	1.37098e-08	up	NA	novel	NM_198703	Wnk1	exonic	2146
chr13	89700401	89700760	diffreps_peak_00036919	5.82601	359	chr13:89685644-89702471-	10.4038	1.49275e-06	3.04211e-05	up	NA	novel	ENSMUST00000109543	Vcan	intronic	16828
chr12	100626501	100626840	diffreps_peak_00031826	6.23907	339	chr12:100615997-100628159-	9.01709	5.76668e-07	1.38255e-05	up	12_101866369_101854207_-12162|15.63|7|8	PMID:25714049	NM_153587	Rps6ka5	sense overlapping	12163
chr7	24228721	24228920	diffreps_peak_00119548	6.64076	199	chr7:24228048-24229840-	12.6842	2.28689e-07	6.60697e-06	up	mmu_circ_0001550	circBase	ENSMUST00000037448	Zfp109	exonic	1793
chr2	117169041	117169320	diffreps_peak_00077177	7.89945	279	chr2:117152992-117182126+	14.6705	1.26053e-08	7.97192e-07	up	NA	novel	NM_033524	Spred1	sense overlapping	29135
chr8	54804535	54804690	diffreps_peak_00131714	9.97912	155	chr8:54804536-54804690+	3.85863	1.04926e-10	2.55104e-08	up	NA	novel	NM_001253754	Gpm6a	intronic	155
chr4	132672895	132673032	diffreps_peak_00096492	7.57217	137	chr4:132656693-132673032+	5.20717	2.67815e-08	1.32302e-06	up	mmu_circ_0001277	circBase	NM_010166	Eya3	exonic	463
chr9	71716407	71716556	diffreps_peak_00142254	5.54578	149	chr9:71705148-71717497-	2.43435	2.84593e-06	5.22932e-05	up	9_71565304_71552955_-12349|16.32|4|4	PMID:25714049	NM_026599	Cgnl1	exonic	600
chr17	15057961	15058240	diffreps_peak_00056578	5.14295	279	chr17:15013672-15059469+	60.8	7.19539e-06	0.000114502	up	NA	novel	NM_001034891	Ermard	sense overlapping	45798
chr4	8751323	8751600	diffreps_peak_00089565	7.987	277	chr4:8751324-8753148+	3.27666	1.0304e-08	7.00796e-07	up	4_8680295_8678471_-1824|20.33|6|12	PMID:25714049	NM_001277149	Chd7	exonic	1825
chr6	128372901	128373960	diffreps_peak_00117161	9.16628	1059	chr6:128365658-128400301+	2.91622	6.81898e-10	1.06021e-07	up	NA	novel	NM_008021	Foxm1	sense overlapping	34644
chr15	77763263	77763760	diffreps_peak_00047017	9.33584	497	chr15:77763264-77763820-	2.35702	4.61491e-10	7.81196e-08	up	NA	novel	NM_022410	Myh9	sense overlapping	557
chr6	29753581	29753900	diffreps_peak_00111333	5.96553	319	chr6:29750392-29759958+	3.08999	1.08261e-06	2.32901e-05	up	NA	novel	AK140774	NA	intronic	9567
chr19	48719481	48719760	diffreps_peak_00070376	8.63189	279	chr19:48704225-48722997+	138.7	2.33407e-09	2.61469e-07	up	NA	novel	NM_025696	Sorcs3	sense overlapping	18773
chr18	5082782	5082930	diffreps_peak_00062343	7.62825	148	chr18:5063194-5088814+	5.08526	2.35367e-08	1.20971e-06	up	18_5088812_5063192_-25620|20.75|5|5	PMID:25714049	NM_153153	Svil	exonic	1424
chr10	84409581	84409960	diffreps_peak_00014005	10.8896	379	chr10:84392256-84422227-	2.60804	1.2893e-11	6.05818e-09	up	NA	novel	NM_001004363	Nuak1	sense overlapping	29972
chr4	154528581	154528900	diffreps_peak_00099246	8.0268	319	chr4:154476639-154528931-	2.8636	9.40157e-09	6.62573e-07	up	4_153903040_153850748_-52292|19.99|3|7	PMID:25714049	NM_027504	Prdm16	exonic	398
chr1	87986041	87986199	diffreps_peak_00003902	6.11379	158	chr1:87975808-87990157-	5.23037	7.69509e-07	1.75325e-05	up	NA	novel	NM_001033291	Usp40	exonic	1359
chr19	7202061	7202280	diffreps_peak_00067864	6.03408	219	chr19:7199477-7204451-	8.67045	9.24529e-07	2.03648e-05	up	NA	novel	NM_134150	Otub1	sense overlapping	4975
chrX	93623541	93623920	diffreps_peak_00147323	7.81876	379	chrX:93620505-93626562-	6.52866	1.51787e-08	8.98103e-07	up	NA	novel	NM_008892	Pola1	sense overlapping	6058
chr16	45758116	45758120	diffreps_peak_00053622	6.73344	4	chr16:45757099-45789117-	6.01181	1.84741e-07	5.59903e-06	up	16_45789230_45757212_-32018|13.95|2|2	PMID:25714049	NM_153412	Phldb2	exonic	1314
chr7	61985581	61986000	diffreps_peak_00122868	6.93357	419	chr7:61945131-61986276-	3.16754	1.16528e-07	3.89588e-06	up	7_69131162_69090017_-41145|14.19|11|23	PMID:25714049	NR_015599	A330076H08Rik	sense overlapping	41146
chr9	44158976	44159108	diffreps_peak_00139666	5.96607	132	chr9:44158514-44164889-	2.77565	1.08127e-06	2.32688e-05	up	9_43972972_43966597_-6375|16.01|12|19	PMID:25714049	NM_007619	Cbl	exonic	934
chr3	34647981	34648820	diffreps_peak_00083662	6.34857	839	chr3:34638358-34653284-	3.17325	4.4816e-07	1.13133e-05	up	NA	novel	NM_011443	Sox2	antisense	14927
chr6	34755739	34755898	diffreps_peak_00111786	8.36917	159	chr6:34755740-34755898+	3.36515	4.27397e-09	3.83501e-07	up	NA	novel	NM_145575	Cald1	sense overlapping	159
chr15	12905401	12905700	diffreps_peak_00044309	5.24051	299	chr15:12881578-12914056+	3.13071	5.7477e-06	9.4427e-05	up	NA	novel	NM_026799	Drosha	sense overlapping	32479
chr2	29971401	29971680	diffreps_peak_00072904	7.66312	279	chr2:29965745-29978616+	94.3	2.17212e-08	1.14504e-06	up	NA	novel	NM_001076554	Sptan1	sense overlapping	12872
chr6	36786181	36786380	diffreps_peak_00111839	6.42083	199	chr6:36782581-36804640-	8.10256	3.79467e-07	9.89199e-06	up	NA	novel	ENSMUST00000101534	Ptn	intronic	22060
chr5	27100721	27100846	diffreps_peak_00100935	5.69046	125	chr5:27100462-27100846+	3.69886	2.03958e-06	3.95636e-05	up	NA	novel	ENSMUST00000071500	Dpp6	intronic	385
chr5	134249621	134249840	diffreps_peak_00108302	5.6264	219	chr5:134176400-134256008-	2.68471	2.36376e-06	4.47823e-05	up	NA	novel	NM_010365	Gtf2i	sense overlapping	79609
chr12	98688281	98688540	diffreps_peak_00031610	8.47939	259	chr12:98682519-98689628-	9.37847	3.31597e-09	3.22956e-07	up	NA	novel	NM_011877	Ptpn21	exonic	1799
chr5	136483727	136484000	diffreps_peak_00108764	8.48274	273	chr5:136483728-136484112-	113.1	3.29045e-09	3.2123e-07	up	NA	novel	ENSMUST00000004097	Cux1	intronic	385
chr19	28546181	28546940	diffreps_peak_00068939	6.72956	759	chr19:28530873-28548423-	5.24309	1.86398e-07	5.64063e-06	up	NA	novel	NM_175459	Glis3	sense overlapping	17551
chr16	45173651	45173840	diffreps_peak_00053599	6.2043	189	chr16:45173652-45173840+	26.9091	6.24736e-07	1.47568e-05	up	NA	novel	ENSMUST00000023343	Atg3	intronic	189
chr11	35892341	35892640	diffreps_peak_00018422	6.4604	299	chr11:35889366-35897438-	10.9625	3.46417e-07	9.21286e-06	up	NA	novel	NM_170779	Wwc1	sense overlapping	8073
chr1	34190081	34190420	diffreps_peak_00001078	6.90282	339	chr1:34187972-34196061+	3.52237	1.25079e-07	4.11999e-06	up	1_34252906_34244817_-8089|15.37|5|5	PMID:25714049	NM_134448	Dst	exonic	6042
chr10	12714321	12714374	diffreps_peak_00009784	6.66867	53	chr10:12697989-12720942-	3.60172	2.14454e-07	6.30216e-06	up	NA	novel	NM_011682	Utrn	exonic	1264
chr6	24505522	24505911	diffreps_peak_00111113	6.94007	389	chr6:24479144-24505911-	2.61896	1.14796e-07	3.84621e-06	up	6_24455911_24429144_-26767|18.23|6|12	PMID:25714049	NM_172535	Iqub	exonic	1402
chr15	76048621	76048627	diffreps_peak_00046721	8.97743	6	chr15:76048442-76048627-	3.24394	1.05335e-09	1.4472e-07	up	NA	novel	NM_134089	Scrib	exonic	186
chr13	43376441	43376640	diffreps_peak_00034860	5.10576	199	chr13:43368034-43385613+	59.8	7.83854e-06	0.000123411	up	NA	novel	NM_178848	Sirt5	sense overlapping	17580
chr1	24614553	24614795	diffreps_peak_00000786	5.36256	242	chr1:24614554-24614795-	6.05282	4.33951e-06	7.44872e-05	up	NA	novel	uc007ams.1	Atpase6	sense overlapping	242
chr2	91680342	91680457	diffreps_peak_00076098	6.80863	115	chr2:91678727-91681695-	7.29936	1.5537e-07	4.86104e-06	up	2_91521852_91518884_-2968|14.06|1|2	PMID:25714049	NM_145528	Atg13	exonic	576
chr13	34077121	34077380	diffreps_peak_00034418	6.03432	259	chr13:34075084-34128212-	13.386	9.24016e-07	2.03643e-05	up	NA	novel	NM_009450	Tubb2a	sense overlapping	53129
chr18	16627567	16627710	diffreps_peak_00062763	7.98887	143	chr18:16622128-16650498-	2.29953	1.02596e-08	6.99124e-07	up	18_16809007_16780637_-28370|17.90|3|3	PMID:25714049	NM_007664	Cdh2	exonic	2177
chr9	71717395	71717497	diffreps_peak_00142255	11.6495	102	chr9:71705148-71717497-	5.30952	2.24154e-12	2.19066e-09	up	9_71565304_71552955_-12349|16.32|4|4	PMID:25714049	NM_026599	Cgnl1	exonic	600
chr9	71883106	71883251	diffreps_peak_00142264	6.73852	145	chr9:71882717-71885288-	2.76628	1.82591e-07	5.54734e-06	up	NA	novel	NM_011544	Tcf12	exonic	456
chr16	24762121	24762276	diffreps_peak_00052055	5.95592	155	chr16:24761593-24762276+	3.59581	1.10682e-06	2.36604e-05	up	16_24762362_24761679_-683|23.08|3|3	PMID:25714049	NM_178665	Lpp	exonic	684
chr6	52743521	52743780	diffreps_peak_00112808	10.1735	259	chr6:52742768-52746770+	19.254	6.70696e-11	1.82776e-08	up	NA	novel	NM_025816	Tax1bp1	sense overlapping	4003
chr8	57513398	57514182	diffreps_peak_00131777	6.55676	784	chr8:57513399-57514182+	2.30662	2.77487e-07	7.67264e-06	up	NA	novel	NM_008252	Hmgb2	sense overlapping	784
chr18	84376121	84376500	diffreps_peak_00066821	5.58755	379	chr18:84315806-84407793-	66.5	2.58494e-06	4.81911e-05	up	mmu_circ_0007573	circBase	ENSMUST00000125450	Zfp407	intronic	91988
chr5	3612341	3612640	diffreps_peak_00099628	8.24921	299	chr5:3605434-3624130-	104.4	5.63368e-09	4.68301e-07	up	NA	novel	NM_027777	Pex1	antisense	18697
chr6	143861383	143861529	diffreps_peak_00117790	5.76582	146	chr6:143841174-143874150-	3.03226	1.71465e-06	3.42296e-05	up	NA	novel	NM_011444	Sox5	exonic	607
chr7	13279861	13280480	diffreps_peak_00118775	9.97001	619	chr7:13278928-13282542+	2.30971	1.07149e-10	2.58769e-08	up	NA	novel	NM_010715	Lig1	sense overlapping	3615
chr9	87221097	87221325	diffreps_peak_00142857	6.70315	228	chr9:87217068-87239933-	2.91507	1.98084e-07	5.9193e-06	up	NA	novel	NM_199316	Cep162	exonic	1796
chr2	118817881	118818260	diffreps_peak_00077250	6.33765	379	chr2:118814246-118823786+	2.34809	4.59574e-07	1.15441e-05	up	NA	novel	NM_026412	Knstrn	sense overlapping	9541
chr15	81440681	81440960	diffreps_peak_00047665	6.49524	279	chr15:81430690-81453059+	74.3	3.19714e-07	8.62219e-06	up	NA	novel	NM_177310	Xpnpep3	sense overlapping	22370
chr17	64033141	64034080	diffreps_peak_00060540	6.33101	939	chr17:63995014-64078975+	2.98832	4.66651e-07	1.16864e-05	up	NA	novel	NM_008000	Fer	sense overlapping	83962
chr18	79099841	79100120	diffreps_peak_00066592	5.4742	279	chr18:79086551-79102662-	6.33537	3.3558e-06	6.00058e-05	up	NA	novel	NM_053099	Setbp1	sense overlapping	16112
chr11	4649761	4649869	diffreps_peak_00016854	5.20895	108	chr11:4640383-4649869+	3.16094	6.18082e-06	0.000100411	up	11_4549872_4540386_-9486|17.86|8|11	PMID:25714049	NM_029291	Ascc2	exonic	558
chr18	84403541	84403740	diffreps_peak_00066823	5.10413	199	chr18:84315806-84407793-	14.6939	7.8681e-06	0.000123759	up	mmu_circ_0007573	circBase	ENSMUST00000125450	Zfp407	intronic	91988
chr5	23620181	23620560	diffreps_peak_00100606	6.93048	379	chr5:23540375-23629477-	3.01243	1.17361e-07	3.91616e-06	up	5_23135295_23046193_-89102|16.08|5|5	PMID:25714049	NM_009274	Srpk2	sense overlapping	89103
chrX	10194841	10194983	diffreps_peak_00145704	6.9016	142	chrX:10164722-10202165-	7.82632	1.25428e-07	4.12669e-06	up	X_9779291_9741848_-37443|15.03|10|19	PMID:25714049	NM_011285	Rpgr	exonic	1053
chr8	46612369	46612446	diffreps_peak_00131367	5.21332	77	chr8:46599719-46612446-	61.4	6.11895e-06	9.9496e-05	up	NA	novel	NM_001001184	Primpol	exonic	639
chr16	39015781	39016300	diffreps_peak_00053101	7.10311	519	chr16:39007134-39025313-	3.99701	7.88662e-08	2.92621e-06	up	NA	novel	AK088657	NA	intronic	18180
chr10	25504136	25504240	diffreps_peak_00010287	9.37724	104	chr10:25479009-25507857+	4.31643	4.19531e-10	7.30627e-08	up	NA	novel	NM_013511	Epb4.1l2	exonic	1644
chr11	100958746	100959046	diffreps_peak_00024271	6.73418	300	chr11:100958747-100959046-	4.18953	1.84425e-07	5.59029e-06	up	NA	novel	NM_008986	Ptrf	sense overlapping	300
chr7	65312554	65312820	diffreps_peak_00123140	7.17181	266	chr7:65311004-65342719-	2.82755	6.73278e-08	2.58405e-06	up	NA	novel	NM_009386	Tjp1	exonic	3990
chr9	67023161	67023295	diffreps_peak_00141894	7.28585	134	chr9:67023076-67023295-	2.7982	5.17786e-08	2.13832e-06	up	NA	novel	NM_024427	Tpm1	sense overlapping	220
chr5	23604681	23605040	diffreps_peak_00100603	7.23362	359	chr5:23540375-23629477-	8.73248	5.83953e-08	2.32168e-06	up	5_23135295_23046193_-89102|16.08|5|5	PMID:25714049	NM_009274	Srpk2	sense overlapping	89103
chr18	80908081	80908320	diffreps_peak_00066689	5.00716	239	chr18:80905652-80917878-	2.82765	9.83642e-06	0.000149986	up	18_81114617_81102391_-12226|15.79|5|8	PMID:25714049	NM_015805	Atp9b	sense overlapping	12227
chr16	85043575	85043600	diffreps_peak_00054677	7.11736	25	chr16:85013627-85043743-	2.9819	7.63198e-08	2.86109e-06	up	16_85043988_85013872_-30116|17.40|10|10	PMID:25714049	NM_001198823	App	exonic	822
chr3	75897970	75898100	diffreps_peak_00084860	6.35294	130	chr3:75894835-75898132-	2.42319	4.43669e-07	1.12168e-05	up	mmu_circ_0010789	circBase	NM_175193	Golim4	exonic	465
chr18	54865841	54866600	diffreps_peak_00064861	11.3858	759	chr18:54802617-54900300-	6.49381	4.11336e-12	3.07947e-09	up	NA	novel	NM_175751	Zfp608	sense overlapping	97684
chr5	130236802	130236900	diffreps_peak_00107820	7.86997	98	chr5:130229449-130236953+	2.82337	1.34905e-08	8.32056e-07	up	5_130712823_130705319_-7504|16.40|6|17	PMID:25714049	NM_027854	Tmem248	exonic	615
chr9	41478941	41479320	diffreps_peak_00139405	6.89924	379	chr9:41475006-41528200+	3.32235	1.26113e-07	4.14442e-06	up	9_41336283_41283089_-53194|14.31|9|21	PMID:25714049	AK045205	NA	intronic	53195
chr17	65696270	65696377	diffreps_peak_00060616	6.5145	107	chr17:65696271-65722087-	2.04069	3.05847e-07	8.31769e-06	up	NA	novel	NM_133685	Rab31	exonic	341
chr11	102800641	102800980	diffreps_peak_00024575	8.30569	339	chr11:102800612-102802916-	2.59669	4.94666e-09	4.2576e-07	up	11_102664230_102661926_-2304|19.06|8|20	PMID:25714049	NM_008122	Gjc1	sense overlapping	2305
chr14	45476041	45476113	diffreps_peak_00040429	8.76648	72	chr14:45461767-45482566-	2.71942	1.71208e-09	2.09907e-07	up	NA	novel	NM_146054	Fermt2	exonic	1478
chr5	103565114	103565289	diffreps_peak_00104729	6.24184	175	chr5:103559137-103582776+	5.28188	5.73006e-07	1.3753e-05	up	NA	novel	NM_011204	Ptpn13	exonic	2092
chr4	98021021	98021220	diffreps_peak_00093153	12.0424	199	chr4:97944867-98041679+	8.30915	9.06985e-13	1.40577e-09	up	NA	novel	NM_010905	Nfia	sense overlapping	96813
chr9	72722061	72722280	diffreps_peak_00142340	10.784	219	chr9:72718314-72747605+	16.9318	1.64425e-11	6.98095e-09	up	NA	novel	NM_010890	Nedd4	sense overlapping	29292
chr19	34957416	34957544	diffreps_peak_00069225	5.37171	128	chr19:34955951-34959571+	6.38776	4.24903e-06	7.3105e-05	up	NA	novel	NM_183046	Kif20b	exonic	410
chr5	90973061	90973440	diffreps_peak_00104095	5.35512	379	chr5:90946773-90974415+	6.90135	4.41444e-06	7.55915e-05	up	NA	novel	NM_026788	Mthfd2l	sense overlapping	27643
chr4	98019581	98019940	diffreps_peak_00093152	8.27219	359	chr4:97944867-98041679+	38.3636	5.34329e-09	4.50709e-07	up	NA	novel	NM_010905	Nfia	sense overlapping	96813
chr10	25501823	25502387	diffreps_peak_00010286	6.29473	564	chr10:25479009-25507857+	2.10765	5.07309e-07	1.24705e-05	up	NA	novel	NM_013511	Epb4.1l2	exonic	1644
chr10	128251481	128251563	diffreps_peak_00016443	11.1177	82	chr10:128251119-128251563+	2.89285	7.6259e-12	4.51617e-09	up	NA	novel	ENSMUST00000055539	Timeless	intronic	445
chr3	34651121	34651560	diffreps_peak_00083664	8.96617	439	chr3:34638358-34653284-	2.35894	1.08101e-09	1.48051e-07	up	NA	novel	NM_011443	Sox2	antisense	14927
chr8	80784661	80784930	diffreps_peak_00133233	8.0355	269	chr8:80784627-80800395-	3.24429	9.21517e-09	6.52308e-07	up	8_83324294_83308526_-15768|17.58|11|16	PMID:25714049	NM_021356	Gab1	exonic	1516
chr17	70995861	70996080	diffreps_peak_00061141	11.8721	219	chr17:70977048-70996271-	4.3921	1.34232e-12	1.61413e-09	up	NA	novel	NM_023402	Myl12b	sense overlapping	19224
chr19	3876981	3877540	diffreps_peak_00067036	8.22382	559	chr19:3875735-3893557+	5.92097	5.9728e-09	4.85477e-07	up	NA	novel	NM_013490	Chka	sense overlapping	17823
chr5	117386561	117386820	diffreps_peak_00106320	5.65822	259	chr5:117384350-117387053+	3.75385	2.19674e-06	4.21976e-05	up	NA	novel	NM_028128	Rfc5	antisense	2704
chr4	97783081	97783100	diffreps_peak_00093136	7.00098	19	chr4:97783082-97783613+	3.04474	9.97735e-08	3.46296e-06	up	4_97450304_97449773_-531|22.52|2|2	PMID:25714049	NM_010905	Nfia	exonic	532
chr6	99429721	99430060	diffreps_peak_00115197	5.12713	339	chr6:99428789-99435345-	5.75122	7.46227e-06	0.0001182	up	mmu_circ_0001498	circBase	NM_053202	Foxp1	sense overlapping	6557
chr18	70580652	70581060	diffreps_peak_00065848	9.78045	408	chr18:70580653-70594399+	2.08869	1.65788e-10	3.58291e-08	up	18_70754053_70740307_-13746|15.31|12|15	PMID:25714049	NM_010773	Mbd2	sense overlapping	13747
chr13	63090581	63091000	diffreps_peak_00036200	7.14075	419	chr13:63068040-63094631+	4.4132	7.23181e-08	2.74275e-06	up	13_63195991_63169400_-26591|10.33|3|3	PMID:25714049	NM_001289924	2010111I01Rik	sense overlapping	26592
chr17	70994601	70994860	diffreps_peak_00061140	8.88847	259	chr17:70977048-70996271-	3.03919	1.2928e-09	1.70533e-07	up	NA	novel	NM_023402	Myl12b	sense overlapping	19224
chr10	84868861	84868962	diffreps_peak_00014079	9.25237	101	chr10:84868352-84880974+	2.47611	5.59277e-10	9.07246e-08	up	NA	novel	NM_027689	Rfx4	exonic	495
chr4	8801323	8801465	diffreps_peak_00089578	7.04768	142	chr4:8751324-8801465+	3.22038	8.96025e-08	3.1995e-06	up	mmu_circ_0011823	circBase	NM_001277149	Chd7	exonic	2389
chr19	28531721	28531920	diffreps_peak_00068937	5.13411	199	chr19:28527760-28540408-	2.96033	7.34322e-06	0.000116472	up	19_28614898_28602250_-12648|13.15|2|2	PMID:25714049	NM_175459	Glis3	sense overlapping	12649
chr7	121057214	121057399	diffreps_peak_00126823	6.11202	185	chr7:121047838-121057399+	2.08904	7.72645e-07	1.75949e-05	up	mmu_circ_0001624	circBase	NM_021554	Mettl9	exonic	586
chr6	119920109	119920190	diffreps_peak_00116474	6.50163	81	chr6:119920110-119921028+	5.60131	3.15041e-07	8.52684e-06	up	mmu_circ_0001516	circBase	NM_011236	Rad52	exonic	303
chr9	21076281	21076720	diffreps_peak_00137941	6.93228	439	chr9:21075710-21077025-	3.17166	1.16875e-07	3.90486e-06	up	mmu_circ_0015438	circBase	NM_027911	Raver1	sense overlapping	1316
chr9	29468181	29469000	diffreps_peak_00138674	7.2681	819	chr9:29462274-29502944-	4.20885	5.3939e-08	2.20132e-06	up	NA	novel	ENSMUST00000075069	Ntm	intronic	40671
chr3	27517041	27517860	diffreps_peak_00083103	6.21045	819	chr3:27498777-27538025-	4.89266	6.15962e-07	1.45861e-05	up	NA	novel	NM_173182	Fndc3b	sense overlapping	39249
chr9	65762221	65762420	diffreps_peak_00141756	5.13813	199	chr9:65740731-65778226-	9.36364	7.27559e-06	0.000115547	up	NA	novel	ENSMUST00000159109	Zfp609	intronic	37496
chr11	69734524	69735091	diffreps_peak_00020835	7.22411	567	chr11:69734525-69735091-	2.43178	5.9689e-08	2.36035e-06	up	NA	novel	NM_001291068	Polr2a	sense overlapping	567
chr4	133189077	133189195	diffreps_peak_00096618	5.52911	118	chr4:133189078-133192260+	2.63928	2.95729e-06	5.40142e-05	up	NA	novel	NM_153423	Wasf2	exonic	405
chr13	103833901	103834260	diffreps_peak_00037600	7.83854	359	chr13:103827907-103835028-	3.34357	1.4503e-08	8.72434e-07	up	NA	novel	NM_001005868	Erbb2ip	exonic	1792
chr6	37355642	37355760	diffreps_peak_00111953	6.14892	118	chr6:37353557-37358647-	3.77704	7.09715e-07	1.64105e-05	up	6_37308647_37303557_-5090|18.62|5|7	PMID:25714049	NM_178661	Creb3l2	exonic	460
chr12	81104606	81104760	diffreps_peak_00030414	10.5128	154	chr12:81104607-81106011+	3.26663	3.07035e-11	1.04662e-08	up	mmu_circ_0000397	circBase	NM_022316	Smoc1	exonic	279
chr8	127156281	127156445	diffreps_peak_00137089	6.92552	164	chr8:127156220-127156445+	17.127	1.18708e-07	3.95013e-06	up	NA	novel	ENSMUST00000026921	Pard3	intronic	226
chr10	79859780	79859955	diffreps_peak_00013103	8.29519	175	chr10:79858952-79859955+	2.40667	5.06772e-09	4.34109e-07	up	NA	novel	NM_008956	Ptbp1	exonic	777
chr2	10185681	10185682	diffreps_peak_00071587	5.36923	1	chr2:10185519-10206889+	4.88911	4.27339e-06	7.34923e-05	up	NA	novel	NM_172471	Itih5	exonic	804
chr6	119944700	119944784	diffreps_peak_00116478	11.5222	84	chr6:119943806-119951131-	2.6374	3.00461e-12	2.5474e-09	up	NA	novel	NM_198703	Wnk1	exonic	2146
chr4	97972621	97972820	diffreps_peak_00093150	9.68231	199	chr4:97944867-98041679+	23.3889	2.07822e-10	4.22875e-08	up	NA	novel	NM_010905	Nfia	sense overlapping	96813
chr18	22917521	22917780	diffreps_peak_00062911	5.01044	259	chr18:22912582-22952310+	58.2	9.76253e-06	0.000148974	up	NA	novel	NM_199024	Nol4	antisense	39729
chr14	30770061	30770400	diffreps_peak_00039823	5.77203	339	chr14:30765963-30817914+	7.02837	1.69033e-06	3.38256e-05	up	NA	novel	NM_019460	Sfmbt1	sense overlapping	51952
chr7	49007541	49008020	diffreps_peak_00122175	9.69238	479	chr7:48992875-49088987+	18.0155	2.03059e-10	4.17033e-08	up	NA	novel	ENSMUST00000183659	Nav2	intronic	96113
chr17	24224907	24225077	diffreps_peak_00056909	7.09322	170	chr17:24224908-24226783-	3.59684	8.0682e-08	2.97135e-06	up	17_24363728_24361853_-1875|18.90|3|4	PMID:25714049	NM_007634	Ccnf	exonic	398
chr16	43575101	43575380	diffreps_peak_00053461	6.79124	279	chr16:43561713-43577748+	8.31707	1.61718e-07	5.01854e-06	up	16_43577861_43561826_-16035|15.88|11|42	PMID:25714049	NM_019778	Zbtb20	sense overlapping	16036
chr18	5766861	5767220	diffreps_peak_00062401	11.814	359	chr18:5705043-5773094+	4.12486	1.5347e-12	1.79101e-09	up	18_5773092_5705041_-68051|13.10|7|16	PMID:25714049	NM_011546	Zeb1	sense overlapping	68052
chr14	45482431	45482566	diffreps_peak_00040431	7.83322	135	chr14:45461767-45482566-	2.41969	1.46817e-08	8.79603e-07	up	NA	novel	NM_146054	Fermt2	exonic	1478
chr8	80733761	80733856	diffreps_peak_00133224	8.24071	95	chr8:80716449-80733856-	2.48814	5.74497e-09	4.74305e-07	up	NA	novel	NM_053124	Smarca5	exonic	1518
chr2	27986461	27986860	diffreps_peak_00072628	5.58003	399	chr2:27980491-27989175+	4.60933	2.63009e-06	4.88842e-05	up	NA	novel	NM_015734	Col5a1	sense overlapping	8685
chr1	14252427	14252614	diffreps_peak_00000349	7.90083	187	chr1:14208895-14283198-	3.70964	1.25652e-08	7.95668e-07	up	1_14273279_14198976_-74303|16.84|4|4	PMID:25714049	NM_010164	Eya1	exonic	1001
chr18	13846881	13847080	diffreps_peak_00062672	7.10265	199	chr18:13843782-13847134-	4.2327	7.89505e-08	2.92824e-06	up	18_14005643_14002291_-3352|18.21|2|2	PMID:25714049	NM_145492	Zfp521	exonic	3353
chr4	124838561	124838917	diffreps_peak_00095262	5.5078	356	chr4:124837698-124842591+	2.41957	3.10599e-06	5.6372e-05	up	NA	novel	NM_008636	Mtf1	exonic	766
chr16	14175290	14175400	diffreps_peak_00051238	7.03202	110	chr16:14175291-14183612+	3.72162	9.28932e-08	3.29094e-06	up	NA	novel	NM_023317	Nde1	exonic	286
chr2	118821381	118821840	diffreps_peak_00077251	6.67909	459	chr2:118814246-118823786+	3.58366	2.09369e-07	6.18297e-06	up	NA	novel	NM_026412	Knstrn	sense overlapping	9541
chr11	107050021	107051160	diffreps_peak_00025039	6.83967	1139	chr11:107047000-107085373-	3.05034	1.44655e-07	4.60205e-06	up	NA	novel	NM_176850	Bptf	sense overlapping	38374
chr3	79196861	79197280	diffreps_peak_00084887	6.56119	419	chr3:79169739-79210747-	14.6667	2.74668e-07	7.61144e-06	up	NA	novel	uc008pnn.1	Rapgef2	sense overlapping	41009
chr10	120871081	120871151	diffreps_peak_00015780	8.09184	70	chr10:120849976-120871151-	3.76126	8.09396e-09	5.9917e-07	up	NA	novel	NM_177092	Msrb3	exonic	304
chr2	35127304	35127530	diffreps_peak_00073765	5.53858	226	chr2:35111555-35140621+	2.63915	2.89347e-06	5.30636e-05	up	NA	novel	NM_012018	Cntrl	exonic	2371
chr10	42196961	42197760	diffreps_peak_00011006	10.3319	799	chr10:42196466-42197901-	2.2826	4.65667e-11	1.41129e-08	up	10_41917707_41916272_-1435|21.54|9|13	PMID:25714049	NM_019740	Foxo3	exonic	1436
chr2	26060361	26060900	diffreps_peak_00072382	9.46287	539	chr2:26060190-26064618-	2.65676	3.44455e-10	6.25298e-08	up	NA	novel	NM_026495	Nacc2	sense overlapping	4429
chr5	125068931	125069077	diffreps_peak_00107491	8.5102	146	chr5:125055733-125069077-	2.05971	3.08887e-09	3.07634e-07	up	NA	novel	NM_011424	Ncor2	exonic	525
chr2	92235981	92236460	diffreps_peak_00076189	5.81272	479	chr2:92186551-92270332+	4.49725	1.53913e-06	3.12133e-05	up	NA	novel	NM_138755	Phf21a	sense overlapping	83782
chr4	132422081	132422500	diffreps_peak_00096460	10.5979	419	chr4:132410750-132506413-	3.23777	2.52388e-11	9.21255e-09	up	NA	novel	NM_026039	Med18	sense overlapping	95664
