# Supplementary material for: The landscape of m1A modification and its posttranscriptional regulatory functions in primary neurons
Source: eLife. 2023 Mar 7;12:e85324. doi: 10.7554/eLife.85324 (PMC9991057; doi:10.7554/eLife.85324)
Supplement: Figure 5—source data 1. [file elife-85324-fig5-data1.xlsx]

## Sheet: Down-OGDR1.5h_vs_control
Mature miRNA	Pre-miRNA	Mature sequence	Fold change	P value	FDR	Regulation
mmu-miR-128-2-5p	mmu-mir-128-2	GGGGGCCGAUGCACUGUAAGAGA	-3.6	0.00020204	0.021574	down
mmu-miR-132-3p	mmu-mir-132	UAACAGUCUACAGCCAUGGUCG	-1.8326	0.00689828	0.080396	down
mmu-miR-151-3p	mmu-mir-151	CUAGACUGAGGCUCCUUGAGG	-1.7663	0.0117124	0.112055	down
mmu-miR-370-3p	mmu-mir-370	GCCUGCUGGGGUGGAACCUGGU	-2.27414	0.0276011	0.176923	down
mmu-miR-409-3p	mmu-mir-409	GAAUGUUGCUCGGUGAACCCCU	-1.54481	0.0396964	0.212045	down
mmu-miR-411-5p	mmu-mir-411	UAGUAGACCGUAUAGCGUACG	-1.93357	0.00638251	0.076868	down
mmu-miR-433-3p	mmu-mir-433	AUCAUGAUGGGCUCCUCGGUGU	-2.02823	0.0366609	0.204345	down
mmu-miR-434-5p	mmu-mir-434	GCUCGACUCAUGGUUUGAACCA	-1.57448	0.0195128	0.154416	down
mmu-miR-668-3p	mmu-mir-668	UGUCACUCGGCUCGGCCCACUACC	-2	0.00804989	0.086	down
mmu-miR-690	mmu-mir-690	AAAGGCUAGGCUCACAACCAAA	-1.8	0.0161301	0.132556	down
mmu-miR-770-3p	mmu-mir-770	CGUGGGCCUGACGUGGAGCUGG	-2.35583	0.00836516	0.087903	down
mmu-miR-novel-chr12_6371	mmu-mir-novel-chr12_6371	CGUGGGCCUGACGUGGAGCU	-2.07292	0.000985341	0.029115	down
mmu-miR-novel-chr18_13753	mmu-mir-novel-chr18_13753	UGGGGGUGGGGGCCGGG	-2.52381	0.00241334	0.042971	down
mmu-miR-novel-chr18_14058	mmu-mir-novel-chr18_14058	GGGGGUGGUGUGGUGGUG	-2.32967	0.000855051	0.029115	down
mmu-miR-novel-chr2_17083	mmu-mir-novel-chr2_17083	CGCGGCGCGGGCUCCGG	-4.35714	0.0320371	0.190146	down
mmu-miR-novel-chr2_17089	mmu-mir-novel-chr2_17089	CAUCUGAACUGAGGUCC	-1.72727	0.0232152	0.165726	down
mmu-miR-novel-chr2_17090	mmu-mir-novel-chr2_17090	CAUCUGAACUGAGGUCC	-1.72727	0.0232152	0.165726	down
mmu-miR-novel-chr6_23575	mmu-mir-novel-chr6_23575	UCGCUGCUGUGUGCUUG	-2.44444	0.0313757	0.18908	down
mmu-miR-novel-chr7_25293	mmu-mir-novel-chr7_25293	CAAUAGGAUUAUGCUGAGGCCC	-3.2	0.00793309	0.086	down
mmu-miR-novel-chr7_25460	mmu-mir-novel-chr7_25460	UUCUGUGAUGACUUUAC	-2.60526	0.00936169	0.095251	down
mmu-miR-novel-chr8_26057	mmu-mir-novel-chr8_26057	AUUGGAGGGCAAGUCUG	-1.59184	0.0274943	0.176923	down

## Sheet: Down-OGDR3h_vs_control
Mature miRNA	Pre-miRNA	Mature sequence	Fold change	P value	FDR	Regulation
mmu-miR-127-5p	mmu-mir-127	CUGAAGCUCAGAGGGCUCUGAU	-1.76471	0.00517963	0.054904	down
mmu-miR-128-2-5p	mmu-mir-128-2	GGGGGCCGAUGCACUGUAAGAGA	-1.8	0.0013239	0.029034	down
mmu-miR-130a-3p	mmu-mir-130a	CAGUGCAAUGUUAAAAGGGCAU	-2	0.0474207	0.18617	down
mmu-miR-151-3p	mmu-mir-151	CUAGACUGAGGCUCCUUGAGG	-1.72872	0.0176356	0.104857	down
mmu-miR-3470b	mmu-mir-3470b	UCACUCUGUAGACCAGGCUGG	-2	0.0474207	0.18617	down
mmu-miR-369-5p	mmu-mir-369	AGAUCGACCGUGUUAUAUUCGC	-1.7027	0.0153943	0.098897	down
mmu-miR-370-3p	mmu-mir-370	GCCUGCUGGGGUGGAACCUGGU	-2.33176	0.0262168	0.130439	down
mmu-miR-409-3p	mmu-mir-409	GAAUGUUGCUCGGUGAACCCCU	-1.59004	0.0268517	0.130439	down
mmu-miR-410-5p	mmu-mir-410	AGGUUGUCUGUGAUGAGUUCG	-2	0	0	down
mmu-miR-433-3p	mmu-mir-433	AUCAUGAUGGGCUCCUCGGUGU	-1.99603	0.0378735	0.158986	down
mmu-miR-434-5p	mmu-mir-434	GCUCGACUCAUGGUUUGAACCA	-1.6544	0.0146596	0.095138	down
mmu-miR-770-3p	mmu-mir-770	CGUGGGCCUGACGUGGAGCUGG	-2.80292	0.00376283	0.052025	down
mmu-miR-novel-chr12_6371	mmu-mir-novel-chr12_6371	CGUGGGCCUGACGUGGAGCU	-2.39759	0.000135609	0.005013	down
mmu-miR-novel-chr18_13753	mmu-mir-novel-chr18_13753	UGGGGGUGGGGGCCGGG	-2.20833	0.0128904	0.092116	down
mmu-miR-novel-chr18_14058	mmu-mir-novel-chr18_14058	GGGGGUGGUGUGGUGGUG	-2.49412	0.00356985	0.050454	down
mmu-miR-novel-chr2_17083	mmu-mir-novel-chr2_17083	CGCGGCGCGGGCUCCGG	-3.58824	0.0423945	0.172839	down
mmu-miR-novel-chr2_17089	mmu-mir-novel-chr2_17089	CAUCUGAACUGAGGUCC	-2.375	0.00147312	0.030223	down
mmu-miR-novel-chr2_17090	mmu-mir-novel-chr2_17090	CAUCUGAACUGAGGUCC	-2.375	0.00147312	0.030223	down
mmu-miR-novel-chr6_23575	mmu-mir-novel-chr6_23575	UCGCUGCUGUGUGCUUG	-2.44444	0.022646	0.120024	down
mmu-miR-novel-chr7_25285	mmu-mir-novel-chr7_25285	AAUAGGAUUACUCUGAGGCCC	-2.6	0.0474207	0.18617	down
mmu-miR-novel-chr7_25293	mmu-mir-novel-chr7_25293	CAAUAGGAUUAUGCUGAGGCCC	-5.33333	0.00289001	0.043763	down
mmu-miR-novel-chr7_25460	mmu-mir-novel-chr7_25460	UUCUGUGAUGACUUUAC	-3.41379	0.00575089	0.058057	down
mmu-miR-novel-chr8_26057	mmu-mir-novel-chr8_26057	AUUGGAGGGCAAGUCUG	-1.9403	0.0136615	0.093427	down
mmu-miR-novel-chr9_27806	mmu-mir-novel-chr9_27806	GGGGAUGUAGCUCAGAUGGU	-1.83051	0.0343035	0.151507	down

## Sheet: Up-OGDR1.5h_vs_control
Mature miRNA	Pre-miRNA	Mature sequence	Fold change	P value	FDR	Regulation
mmu-let-7c-5p	mmu-let-7c-1	UGAGGUAGUAGGUUGUAUGGUU	1.62595	0.000780285	0.029115	up
mmu-let-7c-5p	mmu-let-7c-2	UGAGGUAGUAGGUUGUAUGGUU	1.62595	0.000780285	0.029115	up
mmu-let-7f-5p	mmu-let-7f-1	UGAGGUAGUAGAUUGUAUAGUU	1.75333	0.00279874	0.045906	up
mmu-let-7f-5p	mmu-let-7f-2	UGAGGUAGUAGAUUGUAUAGUU	1.75333	0.00279874	0.045906	up
mmu-let-7g-5p	mmu-let-7g	UGAGGUAGUAGUUUGUACAGUU	1.50715	0.000122212	0.021574	up
mmu-miR-101b-3p	mmu-mir-101b	GUACAGUACUGUGAUAGCU	1.65	0.022646	0.165726	up
mmu-miR-106b-5p	mmu-mir-106b	UAAAGUGCUGACAGUGCAGAU	2.07921	0.0061916	0.076323	up
mmu-miR-130a-5p	mmu-mir-130a	GCUCUUUUCACAUUGUGCUACU	2.53333	0.0361748	0.203983	up
mmu-miR-135a-5p	mmu-mir-135a-1	UAUGGCUUUUUAUUCCUAUGUGA	1.77778	0.00219213	0.041328	up
mmu-miR-135a-5p	mmu-mir-135a-2	UAUGGCUUUUUAUUCCUAUGUGA	1.77778	0.00219213	0.041328	up
mmu-miR-143-3p	mmu-mir-143	UGAGAUGAAGCACUGUAGCUC	1.88793	0.0333365	0.196043	up
mmu-miR-145a-5p	mmu-mir-145a	GUCCAGUUUUCCCAGGAAUCCCU	2.1	0.0379966	0.208169	up
mmu-miR-148b-3p	mmu-mir-148b	UCAGUGCAUCACAGAACUUUGU	1.55412	0.00188847	0.04035	up
mmu-miR-152-3p	mmu-mir-152	UCAGUGCAUGACAGAACUUGG	1.70199	0.0344044	0.196969	up
mmu-miR-181b-1-3p	mmu-mir-181b-1	CUCACUGAACAAUGAAUGCAA	1.52381	0.0379966	0.208169	up
mmu-miR-1843a-5p	mmu-mir-1843a	UAUGGAGGUCUCUGUCUGACU	1.87273	0.0242517	0.169086	up
mmu-miR-192-5p	mmu-mir-192	CUGACCUAUGAAUUGACAGCC	1.5618	0.0412687	0.216032	up
mmu-miR-1933-3p	mmu-mir-1933	CCAGGACCAUCAGUGUGACUAU	2.66667	0.00749043	0.084235	up
mmu-miR-194-5p	mmu-mir-194-1	UGUAACAGCAACUCCAUGUGGA	2.06667	0.0269973	0.176781	up
mmu-miR-194-5p	mmu-mir-194-2	UGUAACAGCAACUCCAUGUGGA	2.06667	0.0269973	0.176781	up
mmu-miR-19a-3p	mmu-mir-19a	UGUGCAAAUCUAUGCAAAACUGA	2.33333	0.00227843	0.041728	up
mmu-miR-19b-3p	mmu-mir-19b-2	UGUGCAAAUCCAUGCAAAACUGA	2.48077	0.000300894	0.021574	up
mmu-miR-19b-3p	mmu-mir-19b-1	UGUGCAAAUCCAUGCAAAACUGA	2.48077	0.000300894	0.021574	up
mmu-miR-1a-3p	mmu-mir-1a-1	UGGAAUGUAAAGAAGUAUGUAU	2.45455	0.000469554	0.025082	up
mmu-miR-1a-3p	mmu-mir-1a-2	UGGAAUGUAAAGAAGUAUGUAU	2.45455	0.000469554	0.025082	up
mmu-miR-203-3p	mmu-mir-203	GUGAAAUGUUUAGGACCACUAG	1.91667	0.0315625	0.18908	up
mmu-miR-219a-2-3p	mmu-mir-219a-2	AGAAUUGUGGCUGGACAUCUGU	1.69697	0.0168963	0.137095	up
mmu-miR-21a-5p	mmu-mir-21a	UAGCUUAUCAGACUGAUGUUGA	1.65466	0.0288444	0.183062	up
mmu-miR-23a-3p	mmu-mir-23a	AUCACAUUGCCAGGGAUUUCC	1.87143	0.0270273	0.176781	up
mmu-miR-25-3p	mmu-mir-25	CAUUGCACUUGUCUCGGUCUGA	1.55764	0.0013189	0.035226	up
mmu-miR-26a-5p	mmu-mir-26a-1	UUCAAGUAAUCCAGGAUAGGCU	1.63849	0.000961384	0.029115	up
mmu-miR-26a-5p	mmu-mir-26a-2	UUCAAGUAAUCCAGGAUAGGCU	1.63849	0.000961384	0.029115	up
mmu-miR-26b-5p	mmu-mir-26b	UUCAAGUAAUUCAGGAUAGGU	1.57843	0.00286464	0.045906	up
mmu-miR-27b-5p	mmu-mir-27b	AGAGCUUAGCUGAUUGGUGAAC	3.66667	0.0161301	0.132556	up
mmu-miR-28a-3p	mmu-mir-28a	CACUAGAUUGUGAGCUGCUGGA	1.97368	0.0249827	0.170361	up
mmu-miR-3057-5p	mmu-mir-3057	AUUGGAGCUGAGAUUCUGCGGGAU	3	0.0161301	0.132556	up
mmu-miR-30a-3p	mmu-mir-30a	CUUUCAGUCGGAUGUUUGCAGC	2.16176	0.000590039	0.027015	up
mmu-miR-30a-5p	mmu-mir-30a	UGUAAACAUCCUCGACUGGAAG	1.61734	0.00884804	0.091477	up
mmu-miR-30b-5p	mmu-mir-30b	UGUAAACAUCCUACACUCAGCU	1.81226	0.0308663	0.18908	up
mmu-miR-30e-3p	mmu-mir-30e	CUUUCAGUCGGAUGUUUACAGC	1.52174	0.00146164	0.035723	up
mmu-miR-322-3p	mmu-mir-322	AAACAUGAAGCGCUGCAACAC	1.83607	0.00195932	0.040514	up
mmu-miR-324-5p	mmu-mir-324	CGCAUCCCCUAGGGCAUUGGUGU	2	0.0232152	0.165726	up
mmu-miR-325-5p	mmu-mir-325	CCUAGUAGGUGCUCAGUAAGUGU	1.8	0.0257214	0.173552	up
mmu-miR-335-5p	mmu-mir-335	UCAAGAGCAAUAACGAAAAAUGU	3.53125	9.17848e-05	0.021574	up
mmu-miR-34a-5p	mmu-mir-34a	UGGCAGUGUCUUAGCUGGUUGU	2.03922	0.0100636	0.099242	up
mmu-miR-34c-5p	mmu-mir-34c	AGGCAGUGUAGUUAGCUGAUUGC	2.12136	0.00144277	0.035723	up
mmu-miR-3535	mmu-mir-3535	UGGAUAUGAUGACUGAUUACCUGAGA	2.05618	0.00967591	0.09691	up
mmu-miR-361-5p	mmu-mir-361	UUAUCAGAAUCUCCAGGGGUAC	1.51064	0.01539	0.132556	up
mmu-miR-362-3p	mmu-mir-362	AACACACCUGUUCAAGGAUUCA	2.73913	0.000169861	0.021574	up
mmu-miR-362-5p	mmu-mir-362	AAUCCUUGGAACCUAGGUGUGAAU	1.60938	0.0232689	0.165726	up
mmu-miR-374b-5p	mmu-mir-374b	AUAUAAUACAACCUGCUAAGUG	1.8	0.0145131	0.127437	up
mmu-miR-376a-3p	mmu-mir-376a	AUCGUAGAGGAAAAUCCACGU	2.66667	0.00749043	0.084235	up
mmu-miR-376b-3p	mmu-mir-376b	AUCAUAGAGGAACAUCCACUU	1.55224	0.0109317	0.10617	up
mmu-miR-376c-3p	mmu-mir-376c	AACAUAGAGGAAAUUUCACGU	2.12069	0.0456051	0.233863	up
mmu-miR-503-5p	mmu-mir-503	UAGCAGCGGGAACAGUACUGCAG	2.6	0.0232152	0.165726	up
mmu-miR-542-3p	mmu-mir-542	UGUGACAGAUUGAUAACUGAAA	2.51923	0.00647559	0.076868	up
mmu-miR-574-3p	mmu-mir-574	CACGCUCAUGCACACACCCACA	1.8	0.0362778	0.203983	up
mmu-miR-664-3p	mmu-mir-664	UAUUCAUUUACUCCCCAGCCUA	2	0.0474207	0.239344	up
mmu-miR-6944-3p	mmu-mir-6944	UAACUCUUCCCUUGUGCCCUCAG	2	0.0474207	0.239344	up
mmu-miR-9-3p	mmu-mir-9-2	AUAAAGCUAGAUAACCGAAAGU	1.96557	0.000336575	0.021574	up
mmu-miR-9-3p	mmu-mir-9-1	AUAAAGCUAGAUAACCGAAAGU	1.96557	0.000336575	0.021574	up
mmu-miR-9-3p	mmu-mir-9-3	AUAAAGCUAGAUAACCGAAAGU	1.96557	0.000336575	0.021574	up
mmu-miR-92b-3p	mmu-mir-92b	UAUUGCACUCGUCCCGGCCUCC	1.55462	0.00465606	0.064881	up
mmu-miR-93-5p	mmu-mir-93	CAAAGUGCUGUUCGUGCAGGUAG	1.87888	0.000528669	0.026067	up
mmu-miR-99a-5p	mmu-mir-99a	AACCCGUAGAUCCGAUCUUGUG	1.60187	0.00796307	0.086	up
mmu-miR-novel-chr1_142	mmu-mir-novel-chr1_142	UUAGUGGAAAUUCUGAUU	4.05952	0.00416307	0.060648	up
mmu-miR-novel-chrX_29907	mmu-mir-novel-chrX_29907	UUGCAUAUGUAGGAUGUCCCA	1.85714	0.0132356	0.1212	up

## Sheet: Up-OGDR3h_vs_control
Mature miRNA	Pre-miRNA	Mature sequence	Fold change	P value	FDR	Regulation
mmu-let-7c-5p	mmu-let-7c-1	UGAGGUAGUAGGUUGUAUGGUU	1.66848	0.00398647	0.052821	up
mmu-let-7c-5p	mmu-let-7c-2	UGAGGUAGUAGGUUGUAUGGUU	1.66848	0.00398647	0.052821	up
mmu-let-7f-5p	mmu-let-7f-1	UGAGGUAGUAGAUUGUAUAGUU	1.76323	0.000172842	0.005496	up
mmu-let-7f-5p	mmu-let-7f-2	UGAGGUAGUAGAUUGUAUAGUU	1.76323	0.000172842	0.005496	up
mmu-let-7g-5p	mmu-let-7g	UGAGGUAGUAGUUUGUACAGUU	1.58234	0.00100141	0.025476	up
mmu-miR-101b-3p	mmu-mir-101b	GUACAGUACUGUGAUAGCU	2.05	0.00318481	0.047106	up
mmu-miR-106b-3p	mmu-mir-106b	CCGCACUGUGGGUACUUGCUGC	1.88462	0.0462647	0.18617	up
mmu-miR-106b-5p	mmu-mir-106b	UAAAGUGCUGACAGUGCAGAU	2.26733	0.00194816	0.033075	up
mmu-miR-130a-5p	mmu-mir-130a	GCUCUUUUCACAUUGUGCUACU	3	0.00862393	0.069428	up
mmu-miR-135a-5p	mmu-mir-135a-1	UAUGGCUUUUUAUUCCUAUGUGA	1.88889	0.0161301	0.100576	up
mmu-miR-135a-5p	mmu-mir-135a-2	UAUGGCUUUUUAUUCCUAUGUGA	1.88889	0.0161301	0.100576	up
mmu-miR-143-3p	mmu-mir-143	UGAGAUGAAGCACUGUAGCUC	2.10345	0.00560128	0.057458	up
mmu-miR-145a-5p	mmu-mir-145a	GUCCAGUUUUCCCAGGAAUCCCU	1.7	0.0077626	0.066716	up
mmu-miR-152-3p	mmu-mir-152	UCAGUGCAUGACAGAACUUGG	2.06623	0.00841975	0.069428	up
mmu-miR-154-3p	mmu-mir-154	AAUCAUACACGGUUGACCUAUU	2.22222	0.0379966	0.158986	up
mmu-miR-155-5p	mmu-mir-155	UUAAUGCUAAUUGUGAUAGGGGU	3.66667	0.0013239	0.029034	up
mmu-miR-16-5p	mmu-mir-16-1	UAGCAGCACGUAAAUAUUGGCG	1.67769	0.00167653	0.031361	up
mmu-miR-16-5p	mmu-mir-16-2	UAGCAGCACGUAAAUAUUGGCG	1.67769	0.00167653	0.031361	up
mmu-miR-1839-5p	mmu-mir-1839	AAGGUAGAUAGAACAGGUCUUG	1.71976	0.000864741	0.022916	up
mmu-miR-1843a-5p	mmu-mir-1843a	UAUGGAGGUCUCUGUCUGACU	2.03636	0.0250116	0.129832	up
mmu-miR-185-5p	mmu-mir-185	UGGAGAGAAAGGCAGUUCCUGA	1.50655	0.0105208	0.080079	up
mmu-miR-192-5p	mmu-mir-192	CUGACCUAUGAAUUGACAGCC	1.7191	0.0187023	0.108133	up
mmu-miR-194-5p	mmu-mir-194-1	UGUAACAGCAACUCCAUGUGGA	2	0.0123485	0.090272	up
mmu-miR-194-5p	mmu-mir-194-2	UGUAACAGCAACUCCAUGUGGA	2	0.0123485	0.090272	up
mmu-miR-195a-5p	mmu-mir-195a	UAGCAGCACAGAAAUAUUGGC	2.52941	0.0212607	0.114592	up
mmu-miR-199a-3p	mmu-mir-199a-1	ACAGUAGUCUGCACAUUGGUUA	2.28571	0.0198908	0.109991	up
mmu-miR-199a-3p	mmu-mir-199a-2	ACAGUAGUCUGCACAUUGGUUA	2.28571	0.0198908	0.109991	up
mmu-miR-199a-5p	mmu-mir-199a-1	CCCAGUGUUCAGACUACCUGUUC	2.28	0.025563	0.129832	up
mmu-miR-199a-5p	mmu-mir-199a-2	CCCAGUGUUCAGACUACCUGUUC	2.28	0.025563	0.129832	up
mmu-miR-199b-3p	mmu-mir-199b	ACAGUAGUCUGCACAUUGGUUA	2.28571	0.0198908	0.109991	up
mmu-miR-19b-3p	mmu-mir-19b-2	UGUGCAAAUCCAUGCAAAACUGA	2.78846	0.0045798	0.053716	up
mmu-miR-19b-3p	mmu-mir-19b-1	UGUGCAAAUCCAUGCAAAACUGA	2.78846	0.0045798	0.053716	up
mmu-miR-1a-3p	mmu-mir-1a-1	UGGAAUGUAAAGAAGUAUGUAU	2.27273	0.00719967	0.065259	up
mmu-miR-1a-3p	mmu-mir-1a-2	UGGAAUGUAAAGAAGUAUGUAU	2.27273	0.00719967	0.065259	up
mmu-miR-20a-5p	mmu-mir-20a	UAAAGUGCUUAUAGUGCAGGUAG	1.852	0.00155456	0.030897	up
mmu-miR-21a-5p	mmu-mir-21a	UAGCUUAUCAGACUGAUGUUGA	1.80822	0.0174051	0.104857	up
mmu-miR-22-5p	mmu-mir-22	AGUUCUUCAGUGGCAAGCUUUA	2.29412	0.0141726	0.093445	up
mmu-miR-23a-3p	mmu-mir-23a	AUCACAUUGCCAGGGAUUUCC	1.92857	0.0126925	0.091732	up
mmu-miR-25-3p	mmu-mir-25	CAUUGCACUUGUCUCGGUCUGA	1.70677	0.0179529	0.105723	up
mmu-miR-26a-2-3p	mmu-mir-26a-2	CCUGUUCUUGAUUACUUGUUUC	2.75	0.0134651	0.093339	up
mmu-miR-26a-5p	mmu-mir-26a-1	UUCAAGUAAUCCAGGAUAGGCU	1.70121	0.0142519	0.093445	up
mmu-miR-26a-5p	mmu-mir-26a-2	UUCAAGUAAUCCAGGAUAGGCU	1.70121	0.0142519	0.093445	up
mmu-miR-26b-5p	mmu-mir-26b	UUCAAGUAAUUCAGGAUAGGU	1.66667	0.021059	0.114474	up
mmu-miR-27a-5p	mmu-mir-27a	AGGGCUUAGCUGCUUGUGAGCA	1.96	0.00746745	0.065259	up
mmu-miR-27b-5p	mmu-mir-27b	AGAGCUUAGCUGAUUGGUGAAC	4	0	0	up
mmu-miR-28a-3p	mmu-mir-28a	CACUAGAUUGUGAGCUGCUGGA	1.68421	0.0135019	0.093339	up
mmu-miR-28a-5p	mmu-mir-28a	AAGGAGCUCACAGUCUAUUGAG	3.6	0.0079662	0.067553	up
mmu-miR-3081-3p	mmu-mir-3081	UUGCGCUCCGAUCUCUGAGCUGG	1.83333	0.0172951	0.104857	up
mmu-miR-30a-3p	mmu-mir-30a	CUUUCAGUCGGAUGUUUGCAGC	2.57353	0.0052906	0.055161	up
mmu-miR-30a-5p	mmu-mir-30a	UGUAAACAUCCUCGACUGGAAG	1.92832	0.0070365	0.065259	up
mmu-miR-30b-3p	mmu-mir-30b	CUGGGAUGUGGAUGUUUACGUC	1.88889	0.0013239	0.029034	up
mmu-miR-30b-5p	mmu-mir-30b	UGUAAACAUCCUACACUCAGCU	1.61686	0.00687613	0.065259	up
mmu-miR-30c-2-3p	mmu-mir-30c-2	CUGGGAGAAGGCUGUUUACUCU	1.62745	0.0390205	0.162203	up
mmu-miR-30e-3p	mmu-mir-30e	CUUUCAGUCGGAUGUUUACAGC	1.69082	0.00887894	0.070588	up
mmu-miR-30e-5p	mmu-mir-30e	UGUAAACAUCCUUGACUGGAAG	1.58601	0.0356514	0.154247	up
mmu-miR-322-3p	mmu-mir-322	AAACAUGAAGCGCUGCAACAC	2.29508	0.00211636	0.033752	up
mmu-miR-335-5p	mmu-mir-335	UCAAGAGCAAUAACGAAAAAUGU	3.21875	0.00738297	0.065259	up
mmu-miR-342-3p	mmu-mir-342	UCUCACACAGAAAUCGCACCCGU	1.673	0.00197619	0.033075	up
mmu-miR-34c-5p	mmu-mir-34c	AGGCAGUGUAGUUAGCUGAUUGC	2.46723	5.95828e-05	0.002526	up
mmu-miR-3535	mmu-mir-3535	UGGAUAUGAUGACUGAUUACCUGAGA	1.89888	0.0408482	0.167609	up
mmu-miR-361-5p	mmu-mir-361	UUAUCAGAAUCUCCAGGGGUAC	1.51064	0.017641	0.104857	up
mmu-miR-362-3p	mmu-mir-362	AACACACCUGUUCAAGGAUUCA	3.18841	0.0140449	0.093445	up
mmu-miR-362-5p	mmu-mir-362	AAUCCUUGGAACCUAGGUGUGAAU	1.73438	0.0093084	0.073088	up
mmu-miR-365-1-5p	mmu-mir-365-1	AGGGACUUUUGGGGGCAGAUGUG	3	0.0257214	0.129832	up
mmu-miR-374b-5p	mmu-mir-374b	AUAUAAUACAACCUGCUAAGUG	2.08571	0.0194167	0.109991	up
mmu-miR-376c-3p	mmu-mir-376c	AACAUAGAGGAAAUUUCACGU	2.06897	0.000141878	0.005013	up
mmu-miR-384-3p	mmu-mir-384	AUUCCUAGAAAUUGUUCACAAU	1.78378	0.00115823	0.028332	up
mmu-miR-449a-5p	mmu-mir-449a	UGGCAGUGUAUUGUUAGCUGGU	1.67606	0.00334319	0.048324	up
mmu-miR-450a-5p	mmu-mir-450a-1	UUUUGCGAUGUGUUCCUAAUAU	1.73333	0.0379966	0.158986	up
mmu-miR-450a-5p	mmu-mir-450a-2	UUUUGCGAUGUGUUCCUAAUAU	1.73333	0.0379966	0.158986	up
mmu-miR-455-5p	mmu-mir-455	UAUGUGCCUUUGGACUACAUCG	2.5	0.0223942	0.119687	up
mmu-miR-467a-5p	mmu-mir-467a-1	UAAGUGCCUGCAUGUAUAUGCG	2	0	0	up
mmu-miR-467a-5p	mmu-mir-467a-2	UAAGUGCCUGCAUGUAUAUGCG	2	0	0	up
mmu-miR-467a-5p	mmu-mir-467a-3	UAAGUGCCUGCAUGUAUAUGCG	2	0	0	up
mmu-miR-467a-5p	mmu-mir-467a-4	UAAGUGCCUGCAUGUAUAUGCG	2	0	0	up
mmu-miR-467a-5p	mmu-mir-467a-5	UAAGUGCCUGCAUGUAUAUGCG	2	0	0	up
mmu-miR-467a-5p	mmu-mir-467a-6	UAAGUGCCUGCAUGUAUAUGCG	2	0	0	up
mmu-miR-467a-5p	mmu-mir-467a-7	UAAGUGCCUGCAUGUAUAUGCG	2	0	0	up
mmu-miR-467a-5p	mmu-mir-467a-8	UAAGUGCCUGCAUGUAUAUGCG	2	0	0	up
mmu-miR-467a-5p	mmu-mir-467a-9	UAAGUGCCUGCAUGUAUAUGCG	2	0	0	up
mmu-miR-467a-5p	mmu-mir-467a-10	UAAGUGCCUGCAUGUAUAUGCG	2	0	0	up
mmu-miR-542-3p	mmu-mir-542	UGUGACAGAUUGAUAACUGAAA	2.76923	0.0200612	0.109991	up
mmu-miR-574-3p	mmu-mir-574	CACGCUCAUGCACACACCCACA	1.66667	0.00749043	0.065259	up
mmu-miR-574-5p	mmu-mir-574	UGAGUGUGUGUGUGUGAGUGUGU	3	0.00749043	0.065259	up
mmu-miR-6944-3p	mmu-mir-6944	UAACUCUUCCCUUGUGCCCUCAG	2.5	0.0132356	0.093339	up
mmu-miR-701-5p	mmu-mir-701	UUAGCCGCUGAAAUAGAUGGA	2	0.0474207	0.18617	up
mmu-miR-9-3p	mmu-mir-9-2	AUAAAGCUAGAUAACCGAAAGU	2.14921	0.0049062	0.053716	up
mmu-miR-9-3p	mmu-mir-9-1	AUAAAGCUAGAUAACCGAAAGU	2.14921	0.0049062	0.053716	up
mmu-miR-9-3p	mmu-mir-9-3	AUAAAGCUAGAUAACCGAAAGU	2.14921	0.0049062	0.053716	up
mmu-miR-92b-3p	mmu-mir-92b	UAUUGCACUCGUCCCGGCCUCC	2.06162	0.000332231	0.009605	up
mmu-miR-93-5p	mmu-mir-93	CAAAGUGCUGUUCGUGCAGGUAG	2.18634	1.08376e-05	0.000492	up
mmu-miR-98-3p	mmu-mir-98	CUAUACAACUUACUACUUUCCU	2.33333	0.0161301	0.100576	up
mmu-miR-98-5p	mmu-mir-98	UGAGGUAGUAAGUUGUAUUGUU	1.63077	0.00855282	0.069428	up
mmu-miR-99a-5p	mmu-mir-99a	AACCCGUAGAUCCGAUCUUGUG	1.9332	7.35601e-05	0.002924	up
mmu-miR-novel-chr12_6082	mmu-mir-novel-chr12_6082	CAGGAUCUGUAACUCCAGUGU	2.66667	0.00749043	0.065259	up
mmu-miR-novel-chr1_142	mmu-mir-novel-chr1_142	UUAGUGGAAAUUCUGAUU	4.5	0.00212276	0.033752	up
mmu-miR-novel-chr7_24573	mmu-mir-novel-chr7_24573	GCCCGGGCCCGCCCUCC	4	0	0	up
